# Supplementary material for: Discovery of a fungal Tc toxin complex and functional mycoserpin through a novel two-by-two comparative genomics approach
Source: Front Cell Infect Microbiol. 2026 May 22;16:1800461. doi: 10.3389/fcimb.2026.1800461 (PMC13236867; doi:10.3389/fcimb.2026.1800461)
Supplement: Supplementary file 2 [file Table2.xlsx]

## Sheet: Summary
Species/strain	Singletons
C.javanicaAPOPKA97	130
C.javanicaIJ2G	1411
C.fuomsoroseaARSEF2679	129
C.fumosorosea_grCorFumo1	98
C.militarisCM01	390
C.militarisATCC34164	117
C.cateniannulataFRD24	88
C.cateniannulataMCB234	208
B.bassianaJEF-350	249
B.bassianaERL836	297
M.brunneumARSEF4556	374
M.brunneumARSEF3297	56
E.festucaeFl1	146
E.festucaeRoseCity	130
T.reeseiQM6a	101
T.reeseiCBS999	68
These proteins formed no clusters (singletons), they comprise proteins that may be falsely predicted genes or proteins truly unique to a given strain.

## Sheet: C.javanicaAPOPKA97
SeqID	Amino Acid Sequence	Description
V2A60_000095-T1	MAELNGEMLAGLRKAEDGTIINADVVAMATGFKKNAEMVRNLFGKDIVAKPDGLRDLDDEQERTGW	V2A60_000095
V2A60_000200-T1	MRIPSFSTGVSHAAVLLELDNQSELDERRAEVLNPNAASGWVLLNYVETDQVPRILHFTASGEDSVDELKPHLEDGQVQYSLLRISVQEKGTLKTTSRDVFITWIGPDVSEDRKIEETALAAEAREYLLPFHAAVVVLNRDHFTDESVADKSHPLSGSNIID	V2A60_000200
V2A60_000256-T1	MMIPSAHTLAAVALIYAAVTLGAPHPAAKIKGLEIAVQQAQANYALQFGHDLSE	V2A60_000256
V2A60_000299-T1	MTLLAQDSGDDKKRRIPHQGRDPAGFTQGADHHHTPGQYRLEVETTSRVLE	V2A60_000299
V2A60_000508-T1	MAPVGHDAGQMHRSPEPGLLGPDERRPLRDGPIDSVGVAGQPSKDPLGGSLPLDRSSWRRARGGGHDGAVPDGAQKGLSNIQSHRTAFIRAGCGGRGPVVSHDGSLRAQGG	V2A60_000508
V2A60_000656-T1	MESYAGTLSSLENYNPQDLSSEALDQALLSLKKQLLKAEAAKLLLPVKELPIKKDLFEVLLEQAVTASQVNVTEIATNNEVNKVVLSTVLDEDFLTRTLQPSPL	V2A60_000656
V2A60_000665-T1	MENGSFAAGKQQGEGVMHAHTRKLHFQLSNLGQLSPLVRHEMVTAYNNNKL	V2A60_000665
V2A60_000695-T1	MGSFALVKVLWHGRSPHRPGYQKPLAPHNREAPSMHCSPGSPQLGVPSAAYAEAGTATARPTTAAATTS	V2A60_000695
V2A60_000696-T1	MFASGKAVLLLAVLAATPTMAGECSPGEFTCGGRLGRFEKDLLYACDAAGSWTLAASCNRLCCSSSEGRAFCKC	V2A60_000696
V2A60_000788-T1	MGTPTLSAHQELRPESVHVGEELSSAAARRTLQYEQEEYPSVDHVLPSAEDGRYYCTYQGCAESFEIPSLLRKHVRDHAKPLKCFYYAECRFRSAQKREMERHMRVHVPDELKTTYKCKQNGCGKSYSRRDKLAEHEKKHH	V2A60_000788
V2A60_000789-T1	MSYDAFGEGAFVDPALLSAESSYAQARNLTDSELAAENVADSNLEMMHQ	V2A60_000789
V2A60_000865-T1	MRVALNDVTLPTGGGKSGKEPLAIAKGSSIIYSLMGMQRRKDIYGDDAETFRPERWEEQNVYRWHFIPYNHGPRMCMGRNFGQQQVEYMLARVCQEFEEIRVPPGQREQQVKIELNCKMAHPCMCEFVPKGQAA	V2A60_000865
V2A60_000886-T1	MYFSIILIALLWSKITSATVGLAWQFPNSSRLRAGLKDITFPFDMSKAPHKDGLYFAQQFFFEDYKENGYTGLQPRPDDGAGSVIHAVFSSFIEEPYEYGVCEGKSAFSTHSIVDGFFVESGF	V2A60_000886
V2A60_000935-T1	MRNETNVRGAGMLVYASLPGMIAFIRQELSYLSESSDSHSQDSVRISRSHALLRNAIELDWPAADIEHLSVSDTDDAYVVVRPELTAKTREHKIPIAHIWMDDSSVPACPTIDILNIVSLGFDGSSTSGFFTTFCVVNDRNSCALITRGKRFHLQRFDEYGAHADDQRDIPHYRIAKLFNSGPTGRLFAIGNVASKQNMKLMEVSLSPTLAVRELVKIPGLVVGDDVVAVAVESTGKTLIIVASLTGASRRVIHKISVPKHGQS	V2A60_000935
V2A60_001026-T1	MIQAFKTSGSASQWQEAASSEYPCFQSPPYTTNNLSLHVTAAQSAPLETMEHGARKR	V2A60_001026
V2A60_001280-T1	MRGAFTAAFPEAGRGGAAAAAVVAVAVAVAVAVAGHAKAKLHCTLKTPDGGYRPVLTAHMYGIPEPMHFARVESDLLAAIRCSSSRNFGTGM	V2A60_001280
V2A60_001327-T1	MPLNLLLTLLETFLAAFRRPEPLDNEEAVEDTVVDIGMLLLLLFLKDVLNSVKLAFLLFFDRKNIDGRFLRRMLPRRDSLLGDEEIVLSCCRRIDGPWAELNRKKLMDLGLLSEFLAIPMSARMVRWRESQPLSVVAALSEWHSDDDMNELVSMDLDFRNFCLWTGQNDVSDSHTVSSFLESVSSERSSQKSSYVRAVKGEVLGRWPPSALECVRSGTSK	V2A60_001327
V2A60_001343-T1	MVTRMPDNMSWEQAAALGAVGHGTVALALWMCLGLEGTSAAPLAPGSDSGIEADEEEEESNYVLVYGGSTATGTMAIQLLQLSGYKPVASLLAAQLCPRALIWRRGRL	V2A60_001343
V2A60_001453-T1	MDWDTLDALLQRVVWPAAPSYPPAVPEPGIDSLLWPVQFSESGAADRMGSASDGRSPPPLDLEKAFRLLASLELESDS	V2A60_001453
V2A60_001524-T1	MTHHVVKKARRSLQEWLDSRDEHHTEMQHYQQRFHQMLVELEGVSRVAGSRIPVEIAENIIMFTLGNVLNPLMV	V2A60_001524
V2A60_001555-T1	MNCDHDPLDPTTRLNFNAYNRRGATYLPIHNQSSSISWSLQHGARHQISFDFATAASKYL	V2A60_001555
V2A60_001601-T1	MIQGSPNGEMDNMMTTSRDASFNSHTTSVASRGDSLGNSNPENTSGSAKAFKDGGNSADGLTTEAKAAIRVTIPVVAVLTGLANFMFFCVRRKRLAKADGELQGSNQQSSDICLLKPTQS	V2A60_001601
V2A60_001657-T1	MRISHILLGLASTAATASALAVDYNVLTRGAMGGSINSVGYKPETDSADAAKVLGSNE	V2A60_001657
V2A60_001703-T1	MQAKIRKPWYRGREVVDLPAAGDGQGLSHPLSGSEMGRRANKLVLYIHGCGYIIIISDSRLDLSVLGELRWWVRRQGVVVAEGVYKLVPRGRMPTHLAPSRCRFPRVDIRAQGLTPRDTIVGRQALEVVEN	V2A60_001703
V2A60_001728-T1	MTPSTTRSKGRIDGAEDAVDDTYVGAEVLRSEDGAGNDEHFGDMPVSGDVLKLDAASKGPTNTGV	V2A60_001728
V2A60_001745-T1	MSDGMNEAHEAIFGARGNQRRTSPPSLPCPVACSAPAPIGILGSLHEPSESHPPDEVARIASLGEHPETRVPGSAGRGTDAKETGRRRSRRRSQRHGGPSSMSRARCGAGAGGGLRAVTPWGRGGRRMLGGAVGHDGSQDTAETRWQLLNSARVIDEVAGKVNYDL	V2A60_001745
V2A60_001847-T1	MRSEILIAVAATCAHLAQANPVREPAAGDTALHSWYDRATAASTAGGDGFHSWYAKATAQAEPDADGDQHSWYRRAAPTATAAAEQKH	V2A60_001847
V2A60_002075-T1	MEVTLDCHDYMLYAYYDDSEFDFECPTFGSPFNYMSAVLQHAERRSYETKNGK	V2A60_002075
V2A60_002135-T1	MNNQSQSLLKLFSSDSEVSQMSFDSSLSSSPNASTAYMSSSMLSGADSGSSSIVLQSKLNPESAVWTPSSWGDFSPTISKGANTTQTDSDLSTSLSSSDDFAHELLSQAIAQGSVSSIGTP	V2A60_002135
V2A60_002249-T1	MLTVGNTGRTEVPFLLDQVEKISIVGELSNTEPTMSVFLICITRKTYKTLSGLKIKFTAIKSKQSDPGSLRFLGLEEDLDIRELKMACSGQRRNVDCSKIHIDSTVVV	V2A60_002249
V2A60_002308-T1	MSLLCSDNGGQLLSWALDFELDSVVSAMRRFVEERGVLRDAKEFFNVGSNVEATMPFGDHVMLDSLDRPPPASTLDALAIAMDD	V2A60_002308
V2A60_002382-T1	MSHQSVKGFEILNPSLYQAGRTLSIREPPPDSADGKPPPPLPRRLRSLLLACEEHINFVEKFFLLITAASFTPLTRKEEFVESFVGGWTDELLQELQQLSQNVDACEPSQPELQSFPLAFMTKFVSFVVDKAVLAGFKKPNEADKCLKPFLQKWEKSGKSAGTSSISDLNTVEKRRRSSRKLFQYDGWYTENDIEAIKQQFGSKPATCRLHNHAIYKLLDPNNLTPMLLWPMLWPLCDTFELYPVVGGTERQKRLRELHQNATAEIQAMKPTADNPTGKNEDHPEGRNYVDCAIFTTEAIEYLRSEVLAGQWPFNLFGSTIDMKRGDPSLLNLIGQDMGYLPDDLDLPGLALSYSSGPVEISRGIDELQ	V2A60_002382
V2A60_002390-T1	MPTKKRPLDVVNQLTDAAKLRVFSGTPVSFTPFRHNDADALRNNNSNKYRDDKLPQFLDQVFLNCGPAMYSLCAEIVRPTWLRSWTKYDIQGLVLQLKRLYQEKPFCDLVTKEPSKEQALVAAAPVSSGASRLPGMECTVQSTPDIVRTTTVFDNEKLLSVTKTFLPPDAASLISSVLCRVPELAVHDMCSAVATHPKRFGPSLSLLKIELLKGNLSDKLYEALENSSFRKQEVKNRCIYLTGAATVRYARTEGGDFLLQLIVSRRYGDAISQVLGDPAASVKEHIGEFLFAGLVNSKFCGQLPTLHKFAVRVNTGVASLPDDSVVDIVLSFATGMILADEHWEQ	V2A60_002390
V2A60_002429-T1	MSLHAFWGPNQTLRTRSSSSASSSRQSTDPHEPPTLNERKPDVFDQYLHRSSCPPHSLSFPINWAVIRRHDGTILKGIQYRIRDKGSMGRRVKVSWIYSHGAELEHSNDKYFLYADCHTKQRYMGQLFAAESTMAAIQHLTEFHEVKRSSNSTDDDEDIHTDHATEVF	V2A60_002429
V2A60_002584-T1	MAVNHPVSSNIGCVSGWARLAEIVPEIRSSGTLSLPAGAGGPRNATKGHSGLLSDDVTS	V2A60_002584
V2A60_002728-T1	MRVLQSPYSSPAAPTVGTKMLIVFNAGSISTNDETAQILDSKSSSPTTHRAGAFQIRIDKLKYHSRAY	V2A60_002728
V2A60_002841-T1	MLSTSFSLVDLPQLSTLPLPFFLFLHPAALGGSPLHRRDQPHVRLAQPLQALARTSELAFSDVERGAQRGRGAARRRQSLTQGPDLDPGVSQVRLEGPPSAPSGSSGSSSPPVGHAGTLQQCPAPIPTPPTPPTPPPAAAAAASHLSLGGYELGFERLHRLAGGPRLPFGTVTTTSTAAAFFFVFAFFGLACQRRGAALALRRLEQLHAEPDVVHKTGVPGLRLLQLLGYAPQPFQDCAFGCPLARGGGRRGGGGGGVKQAIGRAGGPASKSGRQGDSREQRANS	V2A60_002841
V2A60_002844-T1	MYRKRKTVSFRQTLTSHTASIFDGNPHNGTRLAPTFEKMDAHRSHIAKYTDFPIDPADRPLLTVIFTSSLL	V2A60_002844
V2A60_003223-T1	MVLFSAISRIRKNAANAISASRPSPNQLGFMTGASNMSPLRIVMLPRAAVEYSVDPSSRKFISGQSVGKLSRSFRVALPQYAATEARRKLFVSFHPSVSLTVFRPVFARA	V2A60_003223
V2A60_003410-T1	MSIPFAFCHLTAGDDSAPGERAQAAAACAGSGGQQGENLRMHGLIYPALLRESRSIFRCIALYSL	V2A60_003410
V2A60_003476-T1	MLKPVVGVVVLTFVIEVVFDSKTEVDDALPGIVCCVVVLRLGVEERLLVECEADEGSEEDVCELLDALDVIDMLDCVVDAVDVVVREVSELVWDGVRIEEAASLDEDWEDDIKEVVEDLLLGFGAGCIAIEELLVMA	V2A60_003476
V2A60_003512-T1	MSAGGDEASAAATSSVFRIIDLPIETQRDILSYCSQSDLICVALVSKHFHDLASAILYRDFHIIFPDDDDLSFESPVDGLAGGLDTFTTSEYDYARHLRDLSMDTLSSGLKGERSYQPYLYSSSCGKFFNTLLFLTLKKAQFLESFRYAYSSPPPSHAHLLTVKFTAGMCESSSVDRYIGDCDS	V2A60_003512
V2A60_003515-T1	MDFQSGPPPYPHSTGFCETCHETRCLLSQLHGQLDEWVDELEEQMPHLVGVATAEDGRTALSKPAFRNPGETQALAQYWVMRLAIYLTTWRLSKMPSDACRAGVAEDVRRRDETYIGAVRAALRTAAYCMGPGTGSWHREMWVELSDDMKLFCDKRGGLGEIQEKVLRLQEDVNSGWEAHRLTRALVNEGDDRYFV	V2A60_003515
V2A60_003763-T1	MERAMETAMETAMETAMGTVIQTDMETATVIQTAMETAIETVSEGVIEMAMETAMETAMETAMETAIETAIETAKETTVETEMETAMGTATNTAMEMAIETASEKAMETTMETEMETAMETSMETTRETSMETAMETTMVAAMETTMIAAMDVTIETAIETETERVDSHRLRFY	V2A60_003763
V2A60_003784-T1	MKKKASGAAIKIASVGQLIEGLEKYPPTVLLDDVDREFLKAIMSRVRHILEASWSTRNLRGALTINALSIHEDVKRQFNSWINEPSTFWHPESYGVEKYSERISASEKAQAFYLEVLGLRGEVEKHKVRWRLSTISAYLDYDRVSSERITTLQVKQYLEKLQCSANEQDVQKCKEILSGGRRRFEFCQRTGATTDGRKGCYGPMFLEGIPDEIWEKRNGMVKLDAEALQTHLGKLKIQSWSESSRCNEVTEKLLQFNENLFSDSTRPTRADRAPGQNKRKRQRHTGPFHASHEAIDNQSPQDAATTNPQQGLAFTSSESVVSSTEHMGTTATADRGRNPTIPAVALTEHESAAVPWISPQNTEHRLLSTPQRQYDPVRDADDTDAAITSRNHTGLNNYS…	V2A60_003784
V2A60_003893-T1	MANPTRSMPVCFRPQKLSQVAAPSQVVVYPVRSSKAEYYPPDSFLNDGQVPHNRTGNANEF	V2A60_003893
V2A60_004076-T1	MAIRGGILSQPATRQFLSLSSLWRTYAGLHGALFLAPTTQKRGGFRAVLLQKAGSLFNDLWALAALYPLLETISSPPGEDR	V2A60_004076
V2A60_004100-T1	MSLKQETPNARIEVALAKMEVAFADLKEAMNSADSSLTDHSSYEAVRTAVQKISGVESYRQGRLKPYLEQLDRFNEHFDSVFPDISIAEGIWMPIIPLRQLSLQHPSNTTTLWSLLESALAFWNVRLRGDQTLRVIPTPEIIAMIYIKIIRSYTCLFNNVTDIKSLRGIIFLLFTSARGLRVITLTATVCQGEQRAKSEESTKF	V2A60_004100
V2A60_004243-T1	MNDMLFPPPVGVTYTTGLSPRTIAAITLAYPGRNVAPLPLMHANTIDTSTCRNASNRRNRTFCRLPSNLLRCLRCCAAPVAPPYTVYYPDPSYPKSKNWCHSRLTSRNFSRIMAVPPNPCCISRAYIIPATCDVCPAIKSRVSLTPASSIPSSSSLFSP	V2A60_004243
V2A60_004312-T1	MKFSLVCLAFAVGASAVDIAGLVKMVTELVAKEGKPVDTRPQPPAIPEAAGRSQSSSSRAPGRTAAPVNNKLPPHH	V2A60_004312
V2A60_004326-T1	MLHPSTTLTAQATYFAPAQRRQPDQGPKKSQEPFTALLHARPAAVAEVCPHQGQQCKGAHRYGEQVVYSVMSQRLGVSRRATASCSATRRASQARTGPRRYAGSRSTMGRRSSSSREAVPKHAS	V2A60_004326
V2A60_004368-T1	MASLKREFGGYGLPANPSDGVRSRRTQTLTTGGLPRPVNSHATREAFLTKPEKIRQQQSRAPNKLVRVAGRSESGLPVPTSPPQSHEPRRMPSISVSGSASSRSRTQGSLDSSSSGMSYESSLKSLGEQSIKRKSISSRNATIMEDARQVSSSPKRQSMASIDEALDIYLDIGSKPTKLDAVTSKKSLDIGSATPKSPFIYPELDRYRNHEQQSSLGARKPSTDGLYKLSTHDLPPPTPASAVFSGSSSQLSTVSASPSTKFSASPGPGPYSRDTTPTSISSQSPGLLVPSRPSYYTKPKQFSPSNTRPPVTRRRAGSIPDADTIAPDPRGLAAEVVPKVWKDEGRRNAIGKDIRHREQRKRDNVPTSATTNTSSSEP	V2A60_004368
V2A60_004377-T1	MVNMESNDDDDHHIPVWFDGSSVLDPRSPLPRTDGKVRGGSDGDGGDGGGGGGGGGDGGGGGGGGGDASVEVASAWAD	V2A60_004377
V2A60_004403-T1	MSDRYGPDEWEEYLDCCSETHTSPIPTDSLCDECVELDIERYGCGSRFYPHDSQRLSPCSRLQRLDIPHRRRRSLHRLSEPEPRSRYEEHWGERRRRRRGDAPYCHGDLGSQQTEWSPRSSEMIGMQLGEGPRSRRMLTWERGRDQRRDSEEWDAEEYHEVGPRFAPEYDMPRSYSRGRRRSIPSASQAGGWGRRRGSDHPYTVDDRYSSTSSYEPSSSRYLEYR	V2A60_004403
V2A60_004528-T1	MTSSIPKLRVPKTWDEWFHAPEIYAKSLHIWENVDPATDDDPDDTLIKPTLPIKESVTHGLI	V2A60_004528
V2A60_004545-T1	MQPSTSAFLAVVALLGSDVLGMPTPDINVVQANAVNTNRAYTYFADGVQAEDVLGSRQGP	V2A60_004545
V2A60_004873-T1	MPSAPGPRFDSRATSTSTSTSASRTDASERGPRRSSRRARSSAAGLSEASQHRAVNEVVDAAGSSETVTLVVGVAVRETMNTDKEPRDAGWHEPTK	V2A60_004873
V2A60_005021-T1	MTKEEKTTTSPVGEGHGYAPPPPPSQTTPTVEAKQTSTMTKEEKTTTSPRRNMITLILLMEKRNMMMLILQERNMAMNMMMLLNLMEERNMAMNMMMLLNLTEERNMVMNMIMLILMEKRNMVLNMMMMLINLMEKRSMVMNMMMMLINLMEKRNMVLSLLQERNKIMSGAEEVVDNLKKLAQVKQEMVQQVGKEMMELGGKIAKTVGQALIEGADEAVGLFKEKVDELEEKFARLGEELLKEFQEEDDEEDDEEDDEEDDE	V2A60_005021
V2A60_005405-T1	MRENAELKKELQARLLAVEQDLVRNFGDFDFEVRLNTHFQRIYELATVKTAIEEDGEFYVELFQATGDARAEILKMEILGD	V2A60_005405
V2A60_005506-T1	MRTCERHSCAVVGCDGAAPGKANFCTRHLCAADNCLGYKEAQRWFCREHECRRLRCLSKATEEAAGLCLRHLEDRKEEEEEVVVVRRRLVVGGSRQQGSAAPPDDDPRYRVYRGVRRQRPDEGAPPVGRDARRGAASTNYTDVAEAGGRNGPTIGQDAGLNMLLQLRYW	V2A60_005506
V2A60_005555-T1	MLGVVQGPLGSLPRAGLVQRELIDAHLNGNTAVRTAVQLTCDDVSGPCTTGRMGSRTSVQALLVEIVLKALLIAVA	V2A60_005555
V2A60_005771-T1	MMRLPREALLHIVALLPSVSDVNSLALVNKTLLRSLESTLCTWPCERPLLDEAYIEPLSGEEARPSMALAGAAVALVLAVVRNHARAAAALLAVTSHSSDVLDFCVESATRFAKAPVLKTLLEAEGVDLVRY	V2A60_005771
V2A60_005901-T1	MEDYYGGASACLVLVGSGAKPFACLPMQTGVIMSAFQQLWLNREALDSFLQSSWGERVWTLQESLLPRQVIYSVADQLVDGDYVSELMSYLDTGTRRYLGNRRESWYGGYGCYRWTPSLPAIIAPRSIRVKDGKLRIIRSVYGGEEQRRALVRPGHTNSIAMPFEEALALVTNRNSTHNRDYIYGILGLTQNRELVPVELKITWEEMLVNLSNAGMITARQLASTTAHPAPGKSWLPAEPELREQPEQKWDVYARQTPGFGPFMQMEILAGPLKLPKLQWSSQGATVSGAAFQWLKYTIDALPTNNRHGMPCQVAYGFICFPDTPEVSARVCAMSSGNLSPETFTGTHLLLHKELIAANDQTVAIQVEGDNMAEHRARRQRGYILDDFRWFDARKLAEI…	V2A60_005901
V2A60_005908-T1	MAISGLPPSPQGHLQNLVVHHHVPVGLGLVARAAPNGRVWPATAGSSESWWWSSSAHRNSTPNLAISSSADCVSRATIRFPREMAVTSSTSSYSPVGIATRNMASSRTSRPRLSRCSLRNCFRGNMRPDRLDECQ	V2A60_005908
V2A60_005935-T1	MRGMPGPPWRSMPSRRRIIPVLIFLALVALYMRSRLFARVPYPGLTKLPAHLASDNHPITQLISNATAHVEKLLSSQSFTIQDAAEKYRLRRGRHPPPGFDQWFKQATRDNAIIVEEFF	V2A60_005935
V2A60_006042-T1	MEVVEEVGSLSAGKRLEMEKREFPNWVQKEIFKGLGVLVCKEKMQEEEEEEEEIFGDDEGRVGDGDGRHWASF	V2A60_006042
V2A60_006083-T1	MHSPAVSRRYEQNHVSPTSNEAPSIYTAECLDGRRAVSSVRRGQRLAVDGPTSTDVAGALVRHLWRDGKGRQPEELVDQVLRYLMPALYSDFRDEYWKVMAEVLAQEPRQGSNHK	V2A60_006083
V2A60_006641-T1	MNGGQRQDGMLDRGLSMESLQNVSIPEWGVDLRSLGQKVNGSTKGGSDSDVD	V2A60_006641
V2A60_006654-T1	MDLGCSFERLAGAVDSGPGAPAAALASGFVDGPVLLLTWGSDDDEKNGSCFAGAPIPLLACLADDDGEDADGGGAADALACGLGDGPCLLWTGAAFDEGVFLDAADAPACGFDRASSLRPARGPPPADRSSAFSPCRCLGPVPSRPLF	V2A60_006654
V2A60_006682-T1	MPDSGPDNSSRRLNGHVKTAAQDHAIVKRKIEVGSADAAGETLLGYQLALICILQSRIRASKVGDGGTQIARILERKAIESERSRKYVGTDTLLNKSVCGVGHLRSVSEMQLVM	V2A60_006682
V2A60_006763-T1	MPHRHGNENKDLEDTRSLRDRHTGRQSPRKVERSGTDTPEKPIRRVVISFQGRIISKTDNRCDEPRFHEAQEARVYEVLAPDTRTWAFKAILLVALDESARPQAENEVALLQRLRTT	V2A60_006763
V2A60_006782-T1	MAGRINGIVSEWNGSVEPSYGFIDVEGSDKHVAFSIEDVKQNKDEILRVGAMITFVYEPGTYEQAADDVCLRS	V2A60_006782
V2A60_006790-T1	MVHESVLTVEEGRKKLRLPFHDLAKAGVLSKADLHTKIMVLGLRHEEEDCLQVASRGFTRIESLH	V2A60_006790
V2A60_006878-T1	MTKAGKAVNDAVNNKNVTLYQELQGSANVPSPTNLAVIPQIARGIVAEINSLNTFVDMPPLYLAYAVDGILNYHDRLDPSSTSFVATHRSRPTGFQSQIPSAGTPVVVILQALQGAVPSR	V2A60_006878
V2A60_006918-T1	MEHQRPHNDIFSDASEQLPGQFYLIDAPNGEYGHYSALSGYSPSNNSSVGAGSVQPGMQTRHGVVSTSSTSTSTSSINSDITFRTTSNGNSSISTTTRPSTTSQMTFLQLDHRRRPRRY	V2A60_006918
V2A60_006921-T1	MSQSIQRSEQLQSSSASQSPPRSSLTPSPITTTTASPPKRMWTTTAGLDGQKLRLAIALASVVGFSLFGYNQRPMSGIISGEQFTQEFPAAAAAAGVPEGASGAHLAPRLRRPRRAITSCYELGCLLNVGPSGHGTSGFQLIVGKRFSN	V2A60_006921
V2A60_006968-T1	MSLSDNAPIRIQYHDLVSHIEPIRGMSSKNGDDAKLSYKAVRAKYAHEYNLSSNWIQAT	V2A60_006968
V2A60_007074-T1	MAFSMEPSRSTADEELEKFRGDDVNDNDDSGRDKPHSGGVLGTENSATVSFVEPATGDDDDAGDGETSLCIIGSHFIREHPRGTELPLSSPRSISASVTKKQLLASRDWLVPAQSVKSPCAPGDSRELGADRILDYRR	V2A60_007074
V2A60_007094-T1	MSEPSIEGPNSSTPAPKVKQQQRQQQQRSRFKTFVRQCTRTLCVATHGVVARVGLLWCLICHQGTQEF	V2A60_007094
V2A60_007245-T1	MARFPFQSYLASGLQETPEFEEDDDDLELEAERERAEKLFKEYHDPALDDPANFKPPFDEDEVIHEIKYLHLLPLDVWGYFAMASVSTID	V2A60_007245
V2A60_007250-T1	MPSIDFVPSSEAWSTRGLDDVPIDPTLQSATAQYLESLDFAFSVETTLEEESASVATDLYLNSKLDLSLSQAIPTLTEDEGAGVDATEQNNDSDFFLSMRQETMQELSDLNMRLSRQLGAVGSTVNMCADIRTNSRLTALATPPDEKRTFNDVVIFMMHSIQTYHRLLVEILRSARPPHPSRYDSHENLKSSTMGISRLSSIEGDTAEDLNGRMLEATGQPPRKRFRSGRNADSTAPQDLSHNPRIDMPTSLLLLSCHTNLIYNCRDVFAAIRGAISTKNREISLFTISFHNIDSLSIPTDPDLQIIVLIQAVIRMIDKIGRLLGYPDDCETNSGGESNAHSSAIPRRLLDSMLKSEAGADFPADRVGTQALRAEMRQLHNLVYKPL	V2A60_007250
V2A60_007257-T1	MRCTALLVAFATAAMALPTEDVAKRSLKTASAAEKSFCAANPDHFKCVNNIDF	V2A60_007257
V2A60_007261-T1	MSLISPNDSGVLPNTINFHAFIRRSDHPGIAGSALRDDQATVAAVEAVEPYRASPLWEHVAGLVPTAIVVAEGEPVSGTVFALKDGNVTALPGGRLWAAAAGDGGEGRGGGGGGDEDGTATHLGGLIVEIQDLKVSFI	V2A60_007261
V2A60_007320-T1	MAAFHASRRQQDMDPYLDKLAQLAHNPEYPNCFPATYDYGTILLKQGRYREVESVMIPTIDRIIQRPKFWLATIEGLSYIWMVKALCLALVNQNRAADAECALLAAYSSVKSVSEDDTLSLLHMEHLLISFHRKWGLPLPSPVADYERSLSDRFRRMYAPNETVLKKAEGLGMAAVLLGQGALEEAESVSLQFVGTSVAMLGESHALTRRARQLHHAAVSDMRREEENIRNGDFWPHFGSILFPRDCNSADGAGSVLNDCTIAWVTDKSRRPCTILDQLDAMVADFVPLQFPSRACWAIFGLGLLFFISHQRSFVMAAVMAAVIATVIATVITTWERSLFKMS	V2A60_007320
V2A60_007473-T1	MDEKRRLPLHHRHRPSAAADMTTPAVRRRRTRLWLPVLVLVLVGYSLLSGYNVDVRGRLDQLSREATSSAAKAVGGRRKVPLEAHIISKCPDTRVRQSRLFQNCAPVAVF	V2A60_007473
V2A60_007507-T1	MCTQGYRIVIYSCLDAERKNADLDICSDIGKEGHTTVERSLASAKRGYKCGRYDCRDPPKEQK	V2A60_007507
V2A60_007757-T1	MRPVANELFLIGFAMAFLDLEVAIAAEASLLDLQARHALSQIVSRKKAAFADYLKILESTPTKYEQCMQQYLIGRSCANFALHEH	V2A60_007757
V2A60_007961-T1	MGAAIAVAGATAGAAVGALIGGVLSVVGAAAGAVIGDAAGALETEAKIRITKFWNYD	V2A60_007961
V2A60_008201-T1	MLQYCINHHSVARVYRHAQWNVSLAIFNICSNARVLELFPHQLSDGCVSIPRRVVQRRLTLIPLYLLNQTESIHEMLQHGVDDRTVDRHHTFQWRLAAVILFLHACADFVSEVLQNDVNQFRLTVSSCPVQQRVAVPIYLINIRHIHGQQLFDVGTLEFQLILVE	V2A60_008201
V2A60_008344-T1	MGSTEINSDQLPLSGYLDRFSAFPGEHIDGYVSTQCNEGNFNIRLQRVLCADANPGGPGMQFETVGEPMACKGSFQPISIGSYAQIPLSAPLTTSRTWCLSFSVRVVPNGAACLFSDEAQSCDDKLKVFLSRNAVLVEDNHGATYKMHADIAQDKWYRLFVATDLERQTLRIGLGGQNESMHYINHEMQQGPGFIPCPSYLMLAAQDYAQPKSHFTGRIEGLRVMDQFLQSWPGDIVDVDVDYQGSIIGAWDFSIGIESNTIHDTGPFKFHGTLYNQPTRAVPGSNWTGLEHQWRHAPDEYAAIHFHDDDLEDCQWSRTFRFHLPENLRSGCYVLELTAGSVRDWLPFWVRPSPRKQRARLLFLVPTFTYLAYANGRLSNKYEACQQRNLEWSGTTYAS…	V2A60_008344
V2A60_008367-T1	MIVFRQDNNKQDKENVVTREQVLEEEEEEEEEEEEEEEEEEEEEEEEEEEEEERGSQPRNVTDEDSRGRARSGRTRGPRWMDGWMDG	V2A60_008367
V2A60_008435-T1	MASAVTHLEYGLKSDLESMLSRKAPGASRSRINRLTTLCVANVESEAVLIPLLHAHFRKTPDTHKLSVLYVIDSVVRAWLLQARARNQDVSRPAPDGTHVAAGKIIKLLDIQKMGKTFPAENLRIWRQGLTVPPHAAVHCTPPDHAALWASKSGQLGSSDSEVAQRTGKDAETGTCGVGGGPCLELTLQVSTNSQFNFIGSLSDNHDCRAETATTKIKARCPYSSWVSRHPPMALVCLGGERDGIDTALRFGGQPTKAPVTSCRRARARATAAGSSSPTTAPVPRVQPVDTDKAKAKMRCLHTSQAPRFSSVTLTCLDGEDGVVVTVLLYASETRPTQCPLCHIDIAQ	V2A60_008435
V2A60_008455-T1	MFYDRADRLRSSQSDCIPEGCEGTAGGSQISNDAVRWIITRELKGRWTAEDVVSFITQFENVKNRLDPDRMSAGQPLRLNAGDCRSQVVLTQEHLQRVYEAAYGKTLKTLREMISRLAEQRRDFFVIFCGGSYQSPWLSRVVREYMDDMETKASQEEPPSRIRHAFLTDYDNYWPSAVSSGAALSAMRLPRPRQILAEGSAIGIQLIVKTEKPSAG	V2A60_008455
V2A60_008541-T1	MSSSHLPNRHHMLKYPNRILNTSIIKPIMVLLIKSHLPNRYHMLKYLNRILNSSVVKSHLLNCYHMLKYLDRILDSSVVKSHLLNCYHMLKYLDRILDSSVVKSHLLNRYHVLKFLDRILDPSIAKPIAILFRKLGSHPPTYGLITFYCLFKPPIT	V2A60_008541
V2A60_008558-T1	MEVGEKSVNDSFEVPMVAQLLKSVSLVPTVMKSDVLSGTDEKLSSSAKRQHAPNYQYALAELVTPLPVGVFCDLFGVNIVRTFRRKQKRPQSVCEQVVEVLDDGAL	V2A60_008558
V2A60_008604-T1	MDVTNVNLTGRNVMKALGCRVLLEQGTLVWLKDLAGRTTSEVTGLESSLGAR	V2A60_008604
V2A60_008733-T1	MFCFCASGVPYLEQKHTAPLWKYTSPPWSLKGHGQIGTLSCDYSLTCAGCETINSEEAINILPTVSKKQLQLVREDDTDTDTEKEDE	V2A60_008733
V2A60_008746-T1	MGKQEAAAPLEDLATNRPVKRLPGKKAPKRRQFTRNDSETWHRPQATNVARHHTLVDVGLAVIVGGIAFLIFMSYASTQTSHERPKSHWKLARSEVAVCEVSRGLGCF	V2A60_008746
V2A60_008783-T1	MATASVSAVSHTWEMDGAFDTATIPGIGRALREKDLIMGSTTYNGLVPIERQVELQDSHADDIKALLAIIDKYGMGGLFGVHSLHRHGAVPDKTIRVESGAPGIDGMSWTRATAITSDLLAPDKIHANFFKVQGSAIIPFEFSEGPSPLNEQTVLPQFISDIAKYLSEHDLTDLIAIEVKDFTKKSNGDDRRTSELDIVWGKAETLTVVLPFDRMIEEVTNPVPTGWNIQYCNPEADPSQPGPGEHWNQATKSDGSVTHKVHVDSTEPISAERLYASLVEQGYVAKI	V2A60_008783
V2A60_008785-T1	MRIQPRVGREPSALLTDRVARELAEPAGEEASEIGNKLVSKITLNAIVVAIILAAQATILAVFAGQTTLTTLTIFARQAGRTTILAVFAGQTTLTTLTIFARQAGQSTVLTIFAGQAGRTTVLTSVLTILTILAVFAGQTTLTTLTIFARQAGQSTVLAIFARQAGRTTVLTIFAGQTTILTILTILAGTGAAEATALLAQAVADVGGTGGVNDSVSGEGDYGESA	V2A60_008785
V2A60_008793-T1	MASTTITCKAAVAWEFGKDLTLEDIEVAPPKAHEVRAQIHYTGVCHTGTGAVRRSAPRERSSLWEKYRLAIRPGQPRVATEYDAGMTV	V2A60_008793
V2A60_008820-T1	MASTPPTAENNASNADTSTDTLPPRDHLDTAETLKEKILRQIPSQHKVEHDPARTR	V2A60_008820
V2A60_009073-T1	MPCSTAADTDPERQPLLPNDTNPNSAQMPTVQRGRFWRRARTVLKGSASTITFRYPNETIVWTPCGVLEGKLVECSSVVAPMDHFNLMKERFPLVGFDPRGDGASRHLAVCFVGGPERDIRRWSGYLPASLPGAFSRIPPGTWSAMAATS	V2A60_009073
V2A60_009095-T1	MKAPLTEEPLTAGSLIEEAGVEEPPAKESLIEEAGVEEPPAKESLIEEEAGIEEPLTKEPLPKALLRKERLMEERLMEERLMEERLMEERLMEERLMEEALME	V2A60_009095
V2A60_009096-T1	MKPSTLRPPAVEPPQFEPTPFAPTTFKTTTFETATSEPTILAPISNTTPLTNADANQADETPMADDNLGDDEDVLWGGLPRPTVTCPTMPSQCAEIEQTGYLGLPFKIPGCVFSLPTFDVGSTVGCFFNAPTEGSVVAQCLNAANAAECSGKAEKKMPLAPPSGRRKSTAHSRLHLAV	V2A60_009096
V2A60_009167-T1	MKTPFGVWLQPRRAQGTPGPPNWSAKSAPKVPWPLRKDEIALNHKWVRMMRLMALRMMREFKKSRQKKKEKKKKDKAEDEDDEDEDDEDEDDEDAKEEEEEAEKSECH	V2A60_009167
V2A60_009188-T1	MARGLNVYIALPFRRILKAVKTQRNLWKDKLDRDFEAKPREIETAAAVAVGTNMLAVTTRRPRKRRRGRNRRRYDHGSS	V2A60_009188
V2A60_009267-T1	MANSSHCVAETPIETKTRLHVRVSITKKVSYFETWQKKIKLMPFSATQELTEMIYPQMYDSDHPRVWKIGLRLIFWLFVVLQAAALVFIVLCMTGAETSRPEGTRFELYKNSRFEACAARPVQNLDCAALFDTMKHHPDSKGDDSPGNHTTLIYGFNRTHWCDNAWCFRDFKVVPSAIPSRVLLHGRLLQWWFIGETALFTAYHFKSQAFFDAHTPSQCKDKGIGMKLSLFLSLASLAWWWTDFGLILAQGSLPISFTTLSMFSRAVTWRTAHSFHLHPLRCAFHAWRRVGRLSKTVLLGFYLFRVIISALSKKWQLLPGLRQYARPQRSVDFRLDIYEWFMSD	V2A60_009267
V2A60_009449-T1	MAHPSGMLFTPQKIHGRSITGITGFFSMVSSPAFAQVLAYGTTKMVVFEFNE	V2A60_009449
V2A60_009484-T1	MSDSSDLAGVIGTWVAVGLAIMALLGIITPIVLLREARSDRFHAINAVDTQDTGYVRGGFQLHRRRGARERYFQRVRVPILTSPPRFDLMPRAPTSDAAAATGTAVMNSATGWVNFASLVQMYAPDVPLGDALRVMDRDTWLPVHCFWLLVVGLLGRYGKRDDRGLSINPDNAMRLLIERPGAWRNDRAVYGITGAMVWTPPSLEPVGSATFAGDRLYFKVHSVQAQGSLVPDPTPLPLLFWLALGCLPVLPENCGVPARVFDLAHFTPSLISHRTSTRKQQFFRYKQRNGALGSTAAWADATGVDMSCLWSCEEENLPRDFLSLENGRPLPSCWTSVHADEP	V2A60_009484
V2A60_009497-T1	MYNPLNKASYIILVHHLVAYDAIRFHFLKTSRNYTDQYLLVGERPSRSELHFFDRSHSIRPPSATSIPASSPFVRD	V2A60_009497
V2A60_009509-T1	MELRSKLTQVIHGKYASISSIHHWPQEEKECPGQESTRIFATSVAANLGIDEEPVFWYFFEDQQKKPGYSCGDCKSSRSGHIAQEIRMSLGAINEDSNGKIKAKNGRGSNSMLMLDVDNGGNGYSSDQL	V2A60_009509
V2A60_009527-T1	MSTLDLQKAATALANEQCGDRSWSAKGDGVLPPSNSTGVTAPRYFVRFEMDRTQTKLPCSVTVVIDCAMIGSMAVMAHPAEGIMKGGFVIGSSVH	V2A60_009527
V2A60_009569-T1	MQVKASLAIASLLLGANACYVRCSDGSVHDVGASQTVCPGKQIYIYAAPGYADIVYFNGRPNSCVDNEGFSLKNIPQNVIGCGNGVRGRCCGRDRC	V2A60_009569
V2A60_009593-T1	MKLTNIPLYVIACAFPANAATVNFYSDRDCGNLVQTREVFDNSCAQNNPKYNSIKVTGAGTWGQRLWTYKTAGCGWGTQNGCLTAEKTGPSNRHTAA	V2A60_009593
V2A60_009599-T1	MPDESYVTIPYTLWGQLSHALLTSSRVYLLDIAGWDKALIDSDKKFLPTLDAVIERLAASQNYAKANWLGETDDSILARIISKFGWMRKWFEEHTGEESTTETNAAAFANSDVAKSGMQEIQNSIFMDSRFWEEIMTEYQTLPEAFMANSIPEPILY	V2A60_009599
V2A60_009614-T1	MAATTEYYTPAAYEPRAMDSLEDIGITAGMFADLKGYETMKSLVRDVFLKHGVESIGIGLPHKHYPLASNERIVALYNGEIRPVEYAFVPHRDLASVDKAMFPAAFARDIIQTLELTGLDSLLSIVRVGRDAHEEDTMELTFGRSSIVIPTTKEEEAKILEDNNIEGFQAA	V2A60_009614
V2A60_009812-T1	MAPTTDKKSEAPQESKRAESSQAVAEKPDSAEDRKRAAADYYAAFEEFMKIKTEDFSLEAEISKGADECPKKA	V2A60_009812
V2A60_009816-T1	MCWFTGRRDEVFIIEHVKTGALGLYVELGKKSQKKRNSKSCFIFPEGEIDRKGTLEQFPDFVFAKNSDVIGTIPSSCYPYQSWITQGNTGENKKTASKRWLVKVLSEDVETQRFDWKQSKETVLAGFQEDKENKEVKEDEEDEEVGYDPVAFALAIHHGTGHPFGKNHMTDFGKSRS	V2A60_009816
V2A60_009836-T1	MPPAKDPAPRHTPLAQAKDRDYDRGRDNDRSTSSSSSSAAVSAAVIASPPTENEGTSPPRQKRWATKTRTGCITCRYVISSSPVFPGGGRCTGAPLHRRPIGH	V2A60_009836
V2A60_009915-T1	MTAAAAARPAVASFETLWIPQELSDLQLAIVWLEAYHMLLLIEKQELIRKISNFGKGGSKHNRAP	V2A60_009915
V2A60_010009-T1	MLCRCLDWGLIKTSLKADGSVNALAVDKFDADLNGLCYIACRYGVCPDKVRVKTPYDSCNVDKDAVYPGELTGYFECTSITPMSASSTALPSGFGAHRASSR	V2A60_010009
V2A60_010061-T1	MKSTRTTVILALVAIVAGLPAPKLEGQALENVLDRLNAPEPWEKRNDNIARQYMIDPYEEKGDKVARQYMIDPYEEKGDKVARQYMIDPYEEKGDKVARQYMIDPYEEKGDKVARQYMIDPYEEKGDKVARQYMIDPYEEKGDKVARQYMIDPYEEKGDKVARQYMIDPYEEKGDKVARQYMIDPYEEKGDKVARQYMIDPYEENNKEVA	V2A60_010061
V2A60_010062-T1	MQFIIVAAALLTSLSSGVMACKCYDSNGQQNVGNTQGCCRDLRGVFQYGNDCAASSISEHLSDFRRCCGGYSDCDYPHANAEKRDFTPATQTVVVVA	V2A60_010062
V2A60_010153-T1	MVIDLAETSGTALAWSREANAIIRSHGAERSVLRGRRTHFGKQVALAGYRMAVLLDKIAEEYNAQSWDGGDAELEL	V2A60_010153
V2A60_010156-T1	MIDYQGAESICGRAIDAWGAVYGSNHGEKPVLVSSPGAVCMTQGRLSEAEKLLVKALRGYEEVIAPMQSARAVFRRAREYYQPALDAYRAILGPENATVQGLQEGLRHLNRLMLEAGSDQGSAILYEESAKDEEEDR	V2A60_010156
V2A60_010331-T1	MPAAGSVEEPLLAANAPTNKLADDAGTDNINTKLISSAGASACERRGKESLTEADSGGRSNEARSKIAEVLGSVAELSTSPNSDAKDSQWYRISRGLAM	V2A60_010331
V2A60_010399-T1	MALFEDIDDSRSLFSSWDLLVCLAYFAFGCFSVKLGPGAPARRPDLALGDAAGRAARRERTTPEWLRSSRPGILAGIRKKGKPGTTRPGETKQGKGKWPHLRFPEKKKRKLVHFDIVDDRSDKFRRIPSAVRLIHHRRAGPRFCQL	V2A60_010399
V2A60_010410-T1	MKFTAVILFAATLAAAADSSSSSSASSSSSSIASSSSKAASSSSSSASSSSSKAASSSSSSASSTSSSKGPAATNYAAAGAGFAAALGAAAFIV	V2A60_010410
V2A60_010466-T1	MADINEKKCIERLAFSISLCNSIISRTTYSAACIACIACIACIASFTEADDAAASSETLRSHRKLLTKLSNGTLGLEKALSKALIVSASLQEALESALTTGDEAIGKMHEQLMEVQLEDLYLIDEGYMDRNRDLPAAHVQTISFLTNLLSA	V2A60_010466

## Sheet: C.javanicaIJ2G
SeqID	Amino Acid Sequence	Description
TQW01336.1	MVMMTAVGVDVRWRIGLGTPRPSKGSRRRLASSHRTPPPTTTPTTKSLPHHDSLMAHSWVVVATAFHRFRVPSTRCRSSHYGHTAHISASVVSCEVRTASTTTAPISSCTWKPRGGSEGRRQQTGWPATAATTATPSGPRTGLRVPPPPRSQRRYRLPLPANRHRLWLHARGQGCAVVPRAPALSRRRHIQKTGGAAGYPNPRVSWRGETPAAVSNDERQARDRYAAALIRGDAAVFAIVASPARGAAGGRGCRGVSDDWGASGAWSGG	hypothetical protein IF2G_11143 [Cordyceps javanica]
TQW01337.1	MTNSENGKERGRDRGHGGMLGELYCAHVCARQALPYPTKRIQQNYIYVYKDLLYNRYSK	hypothetical protein IF2G_11142 [Cordyceps javanica]
TQW01339.1	MDPDTPRPSICPSRRVFARMTPPAWRVCVTYSLCMPTIAFRSGKVMPAGQCCVTCQSEDASWWAKIAGMFPFAPSSLIWIAKERPRFFVAAECCTASAEGSAPR	hypothetical protein IF2G_11140 [Cordyceps javanica]
TQW01343.1	MSHVCADCKGLRGIKGNNIGGGGAWRRRRRMAAAERPPSLALLLPAPSSSYEQTREAAKQGNRGQKRGRGERERERERKTTTNPAKWKLKPRCSCKAATSRSPGSSLPDQTRELLVYRPCLAPSNGHQQTWTNAAVAAAAPSCSKRRPCTEYQ	hypothetical protein IF2G_11136 [Cordyceps javanica]
TQW01344.1	MKRRPGSMATYTSLCIYRITKLSSSRVALRMEARLRNAKDQRRSGYGDAASSRHEGAARAEILFLLFFLGCACATRQNVTSQSCRGDRSRSGNTIHRLPFSASQR	hypothetical protein IF2G_11135 [Cordyceps javanica]
TQW01346.1	MPRMSEVEVLRLHFSLTAHLQHIVQLSRTLLAAFQVTGGVQDCARPCVYKSFLCLICPVGARAVADLAFHHAAVNTQLLHRWHGCCVVIDLPGTAALGLKDGGEWRCQGEWLVRSRQAIASKKHSIDMSLSSFIPISAIHLALPLIVWHRSSEQNASYCAHATVSCPTPKAFPGSQKPSQIRLRHRVDAVRDDS	hypothetical protein IF2G_11133 [Cordyceps javanica]
TQW01349.1	MDKRGKERPTTVANDCSLIRSGNISSLQPPVSVAELTSCVPFFGVTLLSPPAVKASFLLQPGEGLEKPPQSLTPMDTPASQISELAPRWAVRVVQIHVVPPSRLARRRRRQRTYSSGRCATVIGKRRGHPPHPFT	hypothetical protein IF2G_11130 [Cordyceps javanica]
TQW01350.1	MPLLTLLQPPHPPPSSPCKSSFPSSSCSSPTCQLPSLAEPASSNAHYLHSPSPSNFLLLPLCRHPRSCQPACDSLRLVAVPTITSPWWFRQKLFCGHLRCLYGY	hypothetical protein IF2G_11129 [Cordyceps javanica]
TQW01354.1	MRRIQCLTEVSFANLLPPHSFDFANVLDRPLGDKSALRTGAAAEGYAADRDDMKCGRQTSTIRNDTAMAARARRHERGRWRGPDSCICWL	hypothetical protein IF2G_11125 [Cordyceps javanica]
TQW01356.1	MYIGDSKYLLPGLFLWDTVCVTALSGAAATAGWISTGYGIVRFANGVRILIHRPHARVLDSFEGSSPTATSSRACLYWQVQRATLRNVYLSQECYMMSPRRGGTVSMPQTTVAFVFLLYFFLSSGGGVGDSPLH	hypothetical protein IF2G_11123 [Cordyceps javanica]
TQW01363.1	MTVLLIGTGHRYSVLPIGTRALILAGTIRTDERLITARSSEPIPPILQTIMDPAGLRVFSLGSIWFCT	hypothetical protein IF2G_11115 [Cordyceps javanica]
TQW01371.1	MASTDFFRSKLVDAEPELPCTQFLSDAAFPSDWVENDRVSYGAEGQALPCSTYRTASENGLTTSSPERATRDYGGLVPTVQELISSDENKSGGHVEAEKTACCPPQKHPTETLCY	hypothetical protein IF2G_11109 [Cordyceps javanica]
TQW01374.1	MLLSGRWRTALSACTDPASAGPLPSTTITIRHIMLNRPQAREVGAGNLSLGFCIVLHVMSAARVRRVSLRLYAAPFICAKKLPRLSSRPLHHRRPQLDHYRSPPPPRRASATTSSRYSRARLVSFVLPNFAPCEDRH	hypothetical protein IF2G_11107 [Cordyceps javanica]
TQW01376.1	MIGLLPSTAKGIGPHLCSSCSGKRRRSLRWTCSLLVSALAVTNQSNSMANKDQDMPSRTLRSTSRRY	hypothetical protein IF2G_11103 [Cordyceps javanica]
TQW01381.1	MFLKFPASVSQYETSPRADPSLSPSTATETIATKNTSASSAASVSNSVSMGSSPLSVTSSSTSSPESSPAPSSASTSPSSLPSSSASSSTSILASSSTSTSSSTSSAAPSPMTTGLIQEVCSLCSVTAGKVPNFSCRCGGILIDGDLNNYVWNDQGVLKAGHRSVSFLTQSIDWLLAACKGAPPTGANKVLPLQHLDLGKYKNPTEVNQSNNCRTNHSSDI	hypothetical protein IF2G_11096 [Cordyceps javanica]
TQW01382.1	MNQAEGILKKWKREAYTDRGQHANRGKVYSTSYSQPGLTSQNQTYTIYPLDPTHLTTFSVLAFAYPGLCKTTTAIALSTLDSKAVSSKLASTCKYFPFSRMVTLVVVIASRQM	hypothetical protein IF2G_11097 [Cordyceps javanica]
TQW01385.1	MERIPTLRKHLGTRGEPHELLGPAEGLSPTVSKGPNSGISPKPNCREQPIVRGNLRQEGCHPPCLTLTYPARTTSSSYSLPNDEFCGSASNDLPLEKAGLTARPSAPQPSPQHRPVSSATRVGTHERMLPAHHHRNDHGGRTPHNESYRRQGGTSTDGQNNKYTASRRLDRGER	hypothetical protein IF2G_11095 [Cordyceps javanica]
TQW01389.1	MRTCAVPVVRPISHIQQKNRPAEDELYSHCIFEANMRHPWPSSYGPYMFPRTAISCCSAYSLARIGSSISFARRGST	hypothetical protein IF2G_11087 [Cordyceps javanica]
TQW01391.1	MFAMYPAENKRRGEPDSGEKDCALKRKEGANDCGGYVALVRGENAARLLITILHRTARASPPRIALTAKAKTGSVSYTLCLLSRV	hypothetical protein IF2G_11089 [Cordyceps javanica]
TQW01409.1	MDGRPLPWLVEGSVVTIVSGSSGSARRLWLMWPARSNCWSRFSRLIVHLTTYPPTSVRVFCLFVGFLFFLAFFFLPVCVRHVTHPCARHYLFLILRRALAQLATARE	hypothetical protein IF2G_11073 [Cordyceps javanica]
TQW01417.1	MSGRVATGLSRPDEVTLDGMKIRTPENFHSPLPRRTKRKSRKFILPKAGQRNNALRVFEPFSTLHVQMSAMSEGDLLGCLMTSWSSMLQCIEPGNFQKFVIEKVLAAGQVLYMVGRMTLDAVKTGLSRVLAGYPYHGEADRWENNIGAALAYQTEISHCRLEIDRCIHWYYGRLQRAHLPDERTRLDLPEFELLRPAMLIYLLLGGAQSPVSYEFVDIAKLIEHEPLSNPQYQFLPFFGEHPEELGRQHQNAIRASRAPDCDGTDVDCWSLPNTLQKAYVCARYIAAWTGAMQLFIPHYEQPTEYIIPLPNNRQWETSSIQVALVIPYSTTSLRVKLGDKDSESIDWPPSCALLLVGRALWLMEQRKEDKICAILWIAEDCSLPT	hypothetical protein IF2G_11063 [Cordyceps javanica]
TQW01418.1	MVYGKAQKLFVFVYSTSHRTFTLKLALTSRQYVPGIIAYSISKACPRTLRHFALYVDRMGICFPSGFAKKSVARGKSDHGWRDRAKHEWDASATMFQADTQDPLGSALWPGSIGAEQPADRLSSAQRWLLGIGCGVPRGFVWPGADRMGHLSIGHALIIWHSYAYPPVVLLKKVEVM	hypothetical protein IF2G_11064 [Cordyceps javanica]
TQW01419.1	MKRSYSDYCITQSTQADSCRSNAVARRARGIRHLSDEELSQHGKEDITDNNGDGQSDGSHTAVQRWLSIIRPGTAAERRTSLVAEKELPIVLFQIRP	hypothetical protein IF2G_11065 [Cordyceps javanica]
TQW01420.1	MGLQEAKMSFWTCKVAELASPNWLFTGRNQLLVWFGLVWLPIFSAFSQSIPASHQRKSAHHSRLFVPVHAGHICSRKQMLMKREEDPQLGRSA	hypothetical protein IF2G_11054 [Cordyceps javanica]
TQW01421.1	MRVEAVARCGSTRFGLAINHATNNFFTKPTIAATRSQIEAILGASTILDATCHFQNSMKPLVQLRRHQEWSLELEYCTKRFDLVTRNMN	hypothetical protein IF2G_11055 [Cordyceps javanica]
TQW01425.1	MACRVVPPAHNGPLPDKQPVEFHTFIIAVAIFHCDVTMAVFPLDRHIQPHRIVIHGGICNKSTRQLLRFVMNVKLARAIGARAIVNPQLYCRSLGHAEPALYVSRSPQIKLLLDTGRDMLAGGGQVTGLFAIQRGQQRQELVGVISGRDGISVEESDGGERWLFADALAFTRCDATRSATRNTAPSCLLVAMPSRVLRPLHAGLRAENGLLQQPGRRYPMSGTMLP	hypothetical protein IF2G_11059 [Cordyceps javanica]
TQW01430.1	MRKLKRACAAKWCQTNSPVPTSEAVVTRNNLHSDGQKRRRAAMPSPRGHHRDGSDDVFVHGSAAPSKGSPPSSEGWIPKLNTAACCYQDEHYEGRV	2OG-Fe dioxygenase domain-containing protein [Cordyceps javanica]
TQW01442.1	MLEGAASPIRLFRVLLCVKARRTKAFITFRGNEQHVGLSEQLSSRTRLLEAQGRHQEPHTKNHTATAASRNRVLLRKFDMVFATELTMPYHIFGYSLLLRRLRFRGIEGPGGLSPQETSQLKYYRRVRDNT	hypothetical protein IF2G_11038 [Cordyceps javanica]
TQW01444.1	MLLNGESRHFYIHRGNSPYRVRCNAYITLGIHLPLSEKNQNRMIYSADLALEQPDSATEITRRAPACSSQYSSRIYIMKAISIPQAGYSMCDSDKDPRALRASPARTIAHSRARPDWRSIMVSRVGEVKKMRLVDPTTRGLGLLLKCSADGCSSQKTVHFPQWKLT	hypothetical protein IF2G_11040 [Cordyceps javanica]
TQW01449.1	MDCLPLCANCSAPAKLKCSACLNAPEYESGDAAGVAYCGPACQGQHWNTHKSYCAPLKRRKKLLRTAVLAKTALLTYRRVNYDIDLVKVEKQGDTLYLHQKLHSITKQKSRGPFPDQLTPHIKYQEAALAANQCTTAMAILGPLIRKLLAGFASPIEIMDLNVGRPVFQPKLVPGPDAANLPHTVLKLGRPYSKETWVLDISGCQYGFHDSLLPYHRYIEEGMCRIVNGPQTYDASETSDLDFYETLPFMTRSKAQRIDLATERRYRRCFADFIERHVEQTILEGTDADFQSRKKQFAMDLTAQLSSLQSRAQSFNV	MYND finger domain-containing protein [Cordyceps javanica]
TQW01451.1	MEQQTRPQISYISIMVQVRETINLGSHGGETREGLLAVGNKVGQYILTIGTVSRYKYGNPSNTTAWLWQLDTEPVKAFSSWKMLLCLDSERVSHTGDCFRGGKRATIKGLFQTEAPSCKNHSLNLFHLSYTYLIPIFCAATQKEL	hypothetical protein IF2G_11033 [Cordyceps javanica]
TQW01452.1	MRYWSSPNELSATLPEPLQKKLALQNTEYWETLWCPARTATAPRRQEHQALFPEVERRRQQASRAEARRDSPTRRNGTARSSAPQQGPNTYATTNSTRVR	plasmid replication region DNA-binding n-term domain-containing protein [Cordyceps javanica]
TQW01453.1	MTRQGPADQGHPGGVPYLAQLSSISWGRLVSYQLCCRISRTAIALSPPLIPILYSLCRENCTVDVVSAFRVILILPCWIICCWFHCLNLRRCILMQLSQSLLSFCAPDHWVQLKGVTQRPKHWPK	hypothetical protein IF2G_11021 [Cordyceps javanica]
TQW01455.1	MRAVRLQGPSFGVLLSIIKQVAQVLLLSCIKLRNLNRWIHQDGFGSVLALAVSLRRQRHLRCPQ	hypothetical protein IF2G_11023 [Cordyceps javanica]
TQW01470.1	MEVATTNRYGIATNNASTLAELISTIPQSWRPSIGAYLTTIYRAATKLANVQNTIAAYQRHTAEKSFPASIKNSVKDPKIQFSKEYLGTTEGSLAGGSIKDQVLEAQKNILKRALMLKEEELAALQSVIKFDRAAWRREVVDVASRTATAYGVTFKYSLENDAGPEWSGNAQGQLQADCKGLWAFGDLFHYRAVAIARSLADRSLIEKTRNLNMKKKTDQDKMDIDSEKPTKELIDDSIKAFESRLKTDLARMMGTSPGKRRGGILTSDRQFKKTRQQKQPQQERQAEQPFSRQEREAPKERPSQETRVMTLRSFMAECSKDFRPWLIETYPCIYGSLSSQTRIKIDFAFMRPWEIDTLRVSKPGVFKHPDVVIPDDIEYMLAVNHKFILHQRPEQHDV…	reverse transcriptase (RNA-dependent DNA polymerase) domain-containing protein [Cordyceps javanica]
TQW01475.1	MYFVHRGPGYFGAAVVGGRPMWLRRVYEMHAAAPVVPLLCPFYAPTLPLLCSELNPCSPAPRVLPYPCFDVPALYFLSCTVMLPV	hypothetical protein IF2G_11006 [Cordyceps javanica]
TQW01481.1	MLRDRSQFRNGSRALRPGPLISGKLCRVHDLNFQTRYSQGSFLHINRCGKIAGNFCRSWPTFAPTCTCGCRQPPASQFAQARPYTGRARFPARSQKARCPQLQTVPWKFIVQKLYLGCFHSCQKWRCMLGRSEGTTGSSVGASAPPRCTPNRLHYFPHQAQHGQHSQY	hypothetical protein IF2G_10996 [Cordyceps javanica]
TQW01482.1	MQRCVAFISPRRTLALHVTTGAGMPRPLYFPEVPGPPSCTSTRRRCHVRAGTRVASSDVLTQNEHNSTGPRHALSLDASGRFLKGQPQSFVRLHSTLLPQIADKNAGAWRLVAALQYVGQRSAPVPPTFRAFQLRKTIPL	hypothetical protein IF2G_10997 [Cordyceps javanica]
TQW01483.1	MKFSFVHNASLPHVITPPWDLPHGRQPHSHLPNQACRSSSNKTHLDNLCGFRPKVRVVIGLQCALGESVCIVVLKMRFASRIVAATESMVRHVSSCLQRKSKTACASSSARHDTNSTASIMSLTSYITLATRKTGFTVINIVATGVAEAEANLVSAVNITYEEILRQTPIAIVPGHTPVGRRAGGRIGVGPTVYNRTMEKESRNRVGWRNDWGGFHMRCSYGHELFSSQRCRSPCS	hypothetical protein IF2G_10998 [Cordyceps javanica]
TQW01496.1	MPSRIKAGVRLSATQAGCQSDLLSDDLHSDLCLVQSCLWHSAPQYCKAALATKSAYLFAVTTAPSIGMNVGAAKVNSVHF	hypothetical protein IF2G_10987 [Cordyceps javanica]
TQW01499.1	MVEELSPAVILTCQCSTANARNQFVRQLTSTFPPPPDLMHVQICGRRVPVLRAFHSGLYKERHDQQWAGSDRGRREECRRLLTALLREVFWEAFHMASRDYVVMDRKKDLFEQFRRLRCDGAPCKPPRSNRGWASIKGN	hypothetical protein IF2G_10990 [Cordyceps javanica]
TQW01501.1	MCLLVIYRLAEPHWDYSNGVLKNLRSSLSACIAQRLSIHISNQKAIFPHSARQVLLSSTFVLKEY	hypothetical protein IF2G_10992 [Cordyceps javanica]
TQW01504.1	MLLHVQQFQPSNELLKRLDWHKVRHGLFDVVRALQEHRDPGFVWDMESSAESTAGSDSPRHSTFQDLVSSSVVKQRKQYRCPRYSCRHKRYPRKQDLIRHYATKYLNHKCAKASSIGKEMYNSIRMQVEEDLVSCNIQKHTSGGTSKSKPCPRTSEIRLSSHNNLAPSQHDLHQEDLLAAPVEGLNYNAGIDLPLDFTAQHPLSTSFPTSASSEFQARYTYLAGLFDSAPGSGQTTFMQVVEYFITGDLLVAHARSRWWLLVKIFLVLSALLGAAQDLNQTVDTHSQLQSLFQPEMQAAGAKSC	hypothetical protein IF2G_10971 [Cordyceps javanica]
TQW01511.1	MTAQESTSRPLGRSKLLLWCRTPNLCTARNYRCTVFLEKSTLSPRASSSNPPVRTLLTFLAVATLASRLHDRLFGTICASGRRGTSRSVDRSKSIIITVPVSELNNIFASLHIPMDHSFVV	hypothetical protein IF2G_10961 [Cordyceps javanica]
TQW01512.1	MNLRSFATDHYSAKHLRKSIEAKWRSDLRLLHAKKIQSCISILRILYIALLTYLLDAEGIASQKNSSLLTQSFDVVRINIAARIGVEL	hypothetical protein IF2G_10962 [Cordyceps javanica]
TQW01519.1	MSAARFSFALHSPDNLNHDGHIETESSNSGWWLRMGCILLVSTRRLHSVCCETTLAAGSVVTGRGCRMCRRIRPLRQQGPRNSWRSGSRLSGRVGVVYCHCRRRLSGDTSGCCWAGMGRSSHGRRLSRALPVYHDGNRLGTVGGPLRRSQAWTIGQSPLPAAAQER	hypothetical protein IF2G_10950 [Cordyceps javanica]
TQW01521.1	MRKAELQCQTELRDSHYAYDFNHDNRFNYVRDFDDVRGSDDVRDPRYDYNAHDVQDFNYGHDSKHVRHNRDSRYVRDPDYIRGYQ	hypothetical protein IF2G_10952 [Cordyceps javanica]
TQW01522.1	MALESRPRVKTDLETELAVPLVSGAWGVVEGCDTEEGEIESDDDGEAEAAGDDGAAETDPEVEVGVDDVDDVDDVDDVDDVDDVDDVDDVDDVDDVDDDEVDDDEVDEEAEVANVVDG	hypothetical protein IF2G_10953 [Cordyceps javanica]
TQW01523.1	MRCQIRGDLLRDVWRCRPIPSDVTARQACPTHGQWAGCVGAYPTVFGLGWWTLSRRPRPVVCLKVEPGIVEAVQAGHFEQVEDLLDAGADPKAKDENEVPILALAVEADRGDTGMVLLLIEREADANAKDRNEVPIVARAFQAGRFKFGELLLGCHADLNAKDGEGVPLIALAVEVGRFELVKLLLEYGADAS	ankyrin repeats (3 copies) domain-containing protein [Cordyceps javanica]
TQW01524.1	MTGPLSPSQRAWLRHFLQEHPHESFVWILLRGAESANGEPEKVIDALEAMPAGDEHRRTRMQQLISNVQETTGDPAAVPEIERTMGNYPKVCRALLRQGQRGDAVRLLGQARRPVIVAKMAAEIGASLRCEPDIETAVTAWQVSLTNTPRYSRACDTLCNILAKLKDPHIPVTVWTNIITSPPASNLYAGDSLLQLAHPQLQMVLKARKDLCLSASAYKELWKYGPDQQQAAYLQIIAGTLAEVLSPENGHAFAVTLCEICYTIGQTASRHETG	hypothetical protein IF2G_10955 [Cordyceps javanica]
TQW01525.1	MIEAQRLRAAMGSRSPSLASVVTRANMFPGARRISGHSDNNGRGSCKNPKRPYPSADSPADFFAPCHRIGGAYTYANDNNANTLNGDRCRDAVGATCCIGNGCLSWDDMPR	hypothetical protein IF2G_10956 [Cordyceps javanica]
TQW01527.1	MCQLRRSSSQHCLKLTLMPGCSLRDAAEMDVLRMKVRRGLQDCAYTDDVYICSSIQQ	hypothetical protein IF2G_10958 [Cordyceps javanica]
TQW01549.1	MSTSKYSVGAVGTAAATGASTANSWSQTVRSWHSSQGFRRLGAGCRDSTMKIRPKVIKEKKNQARVF	hypothetical protein IF2G_10936 [Cordyceps javanica]
TQW01552.1	MRRIWYMNSHGWPHSDKKFQDIPTWSDAAMVRRLLLVERAWQRCTDKKGVGKKRDQENKIKGKENKERKREKRERKKVAFYLVSDQVSSICLPRDRTLPDSGCFDMPKNGFSTDMFFGTSTEPKGNSDISFFLDKPPNSRDWLGLQKTASSVSLSICLLRTLLHGTRGAEPGRPDGPATDPVRTKGHVMAHWIMEMIQRHRIIGIVR	hypothetical protein IF2G_10939 [Cordyceps javanica]
TQW01556.1	MIPGPAFALLLVCVAAVAARRHRVQANLAILVCLGCRASIQPPLYRLTPGFLSLRNKPPAASIFLIQSLSCLTTCRPRLFFSPTNACLFLQVDTSAPKPSRALSTSINRLALL	hypothetical protein IF2G_10914 [Cordyceps javanica]
TQW01557.1	MMFTRGCFSPLKWLWSIVRPPPPYRIIIVGGLGTGKSTVSQVQYDPTPCDTTKYTADRDCEITEYSAYSRPEPGLHMLDVNLFNDYDMVVFANRYRTTGFSKTTREWVEKFNHKYPLKPLVVVASDAPPEKIGCYKQTNCSVVFFQRDRDPSALLSTIADFQVMIQ	hypothetical protein IF2G_10915 [Cordyceps javanica]
TQW01558.1	MRLVMPTNRAWTRGNRAQHVDGGPSQATSPQILNVLKKLVEILQLNQPLVARLQFQPPRSCRQD	hypothetical protein IF2G_10916 [Cordyceps javanica]
TQW01567.1	MIGGGASNPACSRDEHGLGRYSTRSRTIRTTPRRVGQRAKAGSENSAILLCLLALPCMTAPAVAFPRRAHSRAVRSRSQSI	hypothetical protein IF2G_10925 [Cordyceps javanica]
TQW01572.1	MTVAGDGTNITLETARAEGWKISVRSNQRHNILAHRDWLSDHTKPAPLDDATLWKLRAAGTCRDWTKP	hypothetical protein IF2G_10896 [Cordyceps javanica]
TQW01578.1	MLSPRRLLACAFGAAGRLRAKHAPSLTRQDLNWATLLLRYNRVWTWDRAREEERIRIVRYKK	hypothetical protein IF2G_10902 [Cordyceps javanica]
TQW01585.1	MVSGPPSSVSDSSALVCACHQPTVTASLEYLADTCVSHYIMIEKSGIEEFILNENVRCYLKM	hypothetical protein IF2G_10909 [Cordyceps javanica]
TQW01587.1	MSVIPSHAAVGNNRDTPSQTLDNNSSSANLAQTVIRFAASRRRTINFRRSALFQTLHCPSPLRSGFSTASSALPVSPFPSPYVLFLLLSVSPRHLARRRSGQLIQATRALGSAPTPLVMATNTAEQTTGLTRLSLDLSAGWITLLCFLGGTIFILLWLRPTPRSKRAASTGSIS	hypothetical protein IF2G_10881 [Cordyceps javanica]
TQW01589.1	MEKVNHTQLSFATSHFHVLSEVLLPPCIPAPKGAYAWLHGSIVKITDAVSSIRKGTIRFRVHTR	hypothetical protein IF2G_10883 [Cordyceps javanica]
TQW01598.1	MIEFAMRPCEPFRQEVFKGQEIVGSYCFKRSSVGLCAPSSWVEPAHSSLRLMVTEQMLVRAVLYVVIDRDTVLIYAATTYRACRVRRGVRDGRPRMRERKVKTLDRSTTVSHIGSQHDRPLFRKVSLHSRGRAVASINCDVSAVHIHFPIPELVEPRPREQSASCWYVTGQLELPCRRQRAVSNIRVHRACKAEIVRLSGLPAHHRCALLCIEQRMIALTREIASVGAERCRHVIVDIGRVRVEFGAEGWWPTHLHVPMRDAQDAKKKINRRNHSSLHDYES	hypothetical protein IF2G_10892 [Cordyceps javanica]
TQW01599.1	MSARNDPRLSHPPISPPAHGRLLSRSFAAQRPDEYAGSASTGGNHVLSLQIGSRYEIWYSYRYTSFAARLAQSHPDLDSVDFNPAPAIRPKTVAVLLWILHAVLFLLSIPIGGRAEDIVFNIIRNINAVFINPLFTLIATIAVFTQVRAMPNQLMGCSHWTLGAQSFTYLILAISWPFRLILPPNMWGPGSKPDQLLQWYRWVGWACVNNAILAIGQGVMLFLSISRVADGHLNLADERRPLIGSDEIQLTINNGPNGALKGPTPFSSAPEIRSVGGARPQSGPFQPLFELSLASRLAPPPKMAVGWEHLLHDSSTEMALHGKQRSI	hypothetical protein IF2G_10863 [Cordyceps javanica]
TQW01603.1	MHPPSALERVQYNPPAPFALQQSSLLQGYIGRLSFSVPGLSISRISHFYQHQPSATILPFLSPASGSRPSAMRLVSPGSLLSVALVMASSALILGHGIAVMQGIGAPGSYRAHLSD	hypothetical protein IF2G_10867 [Cordyceps javanica]
TQW01614.1	MNNAGRLALKANHRFIRHNRPRPKRVGPSVCRDETCYAQFALIQKVCGAASSEMPYCHNMYSKYPSFESRCNNSINYMKLVVNDKRIGWLAAFTDFFAISCPSLAQNTRPASGGSGCSAKASLYRHFSRRSLSVLNANVPFCSYGSSQQH	hypothetical protein IF2G_10878 [Cordyceps javanica]
TQW01619.1	MVSGSTCEGCAICGNLPCRNRSSCNPNVPLEPAERLLLKWPKTTKTYLEDHGLSSTTRVPESNGGQKDYKSLRVRLMCHPGSKS	hypothetical protein IF2G_10854 [Cordyceps javanica]
TQW01629.1	MPYMPRLSQWSPSTAAESPRHYNYLWQCMKEDPLARAKHPGTRQAFVYSPQKDNYVYLVCPSGRGSDWPMKEMRRLPFKEYTRTGKYEIKIGGVTINVQNFVTGCESISVPSLACFFDAGGKTTKVWVSRPGEEVVEMPVLQDVAAFQSPFKSRRHEKPTVSIHWAGNLPVTRFHAEAPATDKPYLNGPYKEVWNAIDRDWIQNQIWDDAPPALICSKTQPKYVYLVFANTDEREKRDVLKKDQIPFRKDLKRQGDYHVIVGKVTVNVAFLMISPSVSILYENPDWFLDENGEDGVCVCQYGKLAEAIEPRRVVGQLGPFAPPSKVTIHVERTNMLIPWAKFEQMYPVQI	hypothetical protein IF2G_10826 [Cordyceps javanica]
TQW01630.1	MAPEYKLDVNRVFGSDDSTALITVGRRNWWDVFDLLVRSGADVNVCPKRKHRLLSYIVREGNSKSVERVVAARADVNLSDNHGKAAIHLYDLMVWRQKKSVVVQLLQAGADVNARVGPLYFLIFDRYENCSIFELAIILAADGDSFCFDLIEEHSRIVSDEAVHVATKFIHTNMGERPSLVDVQREVGFLQSVAKQ	ankyrin repeats (3 copies) domain-containing protein [Cordyceps javanica]
TQW01631.1	MKATLGGLRGNLEAEQMAKTQNDQRDSHLSTNRAESPNLTARSLNVKLQKELGRVASAVEYNKMIVNNSLYPVLEVLDLVVYTLGLLRVECDVDIECQIEPLADTTVSLLDTQISSITETIQVESRGPPLPVAVDERIQKAGGTTSALRLQPAALRSKKPPVSIEHHNAELNIELQQLDMERLYYETLATSTLNSTLGWAQWGCGQLHAFLLECENHLTEKAVVPDYPWRSSSSVYSVKEEEADDEFTSAVVSSGDSTRTGSQTPSKQSPSSPSTPSSSDPLQTDTSPPAPPPLESLLQQMLERDYNWRYRPFLRMLWAIDEFCGQLKTISQDAETQIEEAQSRWEQNCTKTWL	hypothetical protein IF2G_10828 [Cordyceps javanica]
TQW01634.1	MEIELHNFGFLVITLHLINLLFYFHQLNAGATKNQMLTSHPSTTLLDAMFDTKGDISAAKDIKKSKNVPRKQQTSDRTLRSKRPISKSMVLRAIKASQLASSDLRRGEPAYRTAYGRPVFPSWKLMENEKTSLLLQERHEN	hypothetical protein IF2G_10831 [Cordyceps javanica]
TQW01635.1	MIFFAIACLSARVVGLHTDFVTEIVTTTTTTCLSQTTAELPMTANPPYPYETAASMSKAWPLFPVTGTNAESSALTRSNPTESRYYTLESGRKLNSGGSIATPAATTSMNTPVFVGEAARSLPPRGRMATVTLIMAICGWLYSIYLFLVLRY	hypothetical protein IF2G_10832 [Cordyceps javanica]
TQW01638.1	MKSERYSTANPAEHINDMPPLPRDASRQEQAGMGSNAGFKAPRGERLYQDEEQSCPLAALSADIVEFYGCQTPFQRGLDSVEKNCVNCVLHCACFRRQLGSSESPLSGPCEGVTACHVYNGESVLGDVVENACHSCGLHRGCAVALLEEENNPSKSPFRCLVACSVRARGFSTVDNIVRKGYGKCALQRDPVLQLFAESHNSLHRPCKCDIELQRPSPRSSSDTLKTARWTAPRPPTPMPPSQINMSSDSSICSSSCSDDSFEAA	hypothetical protein IF2G_10835 [Cordyceps javanica]
TQW01639.1	MASPGPRPPEKEMLEEGERRQALLTVLKTVLENTLNPKQISIQWLCLDNMSKLSSLVSDTAGSMMKVDWRRTRAGTNTFQQLSHRSTIYFPIAGVILTLNLWLLGVHRFSWLPSCLRFLM	hypothetical protein IF2G_10836 [Cordyceps javanica]
TQW01640.1	MCSTIVLRLQCVVCRGVKFRDTKRVGCKKTSLLSRMFCNGKEKPLWIRDICSRCIKTQQWLDLKLEPKCRQDGGQWPVELCAKP	hypothetical protein IF2G_10837 [Cordyceps javanica]
TQW01642.1	MPMQIVTPRRANCVLVLGADPWEQFSPLYEDSGTTVAQCIRTPHLCLVGIQALHHPDISQFRDLSRVLHRNIVKPLCFYQHDDTFYIVHEIIGKKICDILPLSINKARSIMRQVHYSFQTEMFVRIKEVRITIGEITDCIAVLDWDHELSVDSNTFDANYEYIASYILDLMGLIGQFITWDASALQFIHALQSGTLSLSQNTFLPLFDQAFTFYSPKSFLTRTLKFR	hypothetical protein IF2G_10839 [Cordyceps javanica]
TQW01644.1	MPTPFPYLFDNGKAHKYVDTESNRMTIKDATTLEFTPNRQTDIDLPYTIDIELAYKHDSDSIELTASYGGLFHEQRSFVAPIVSFRFPETERYGKRTTATLGIDRDGYEENGCLDHTVLYIVPRSSSIWCEFMKGLRPSSEETVFVALAGTCKAEDDYYYVSENQDQQSRNLLQRFPPEARDYIIKTKLAGKTRGPYSKMANQPSGPKD	hypothetical protein IF2G_10841 [Cordyceps javanica]
TQW01646.1	MAPETEVTRASSVECQLRLTGSWAVASSTSQRTYDTTGCECLPAEAPERSVDAKRLVICSRCMQVRHTQHGQLCHVVVLPARPGRCGAHAAVASTTQVRAFGTTPLVFAGFGYESVRQGHITGGAG	hypothetical protein IF2G_10843 [Cordyceps javanica]
TQW01648.1	MDDELAALEFDEYLRENAGDRQSSWASTADTFERYCASQERQAAMHKSHMDVAHLACAFAALENIQSIHISQAFTERSGPWCGEEGSPDGYRDFLDLPTSQRMLGVIVAALVAADRKIESLTLMSMDDFGPYPLVGLIKALNVSNGKVYRDALSHLRVLTIFLPHDGEDADVDEAQEEQSISIRGLSDLMNSLPMLQEVVFPGDVWHSRRILQSFLDSLRIKRLRSIEIRGAAFATASSLVDFLKRHSEGIVRVRFCDLILHEGSWRNVFHQIRTTLNLQSSEMSGNFYTATPGEFRSVEIGYDVEYHCIPILQPQCIEEFIERRTDVDPFDLLQKYLHEFPLHSTMGEIHQCAAHICPHYYTPEQAARELTNKKQNVGANGLVYNLTRHDLFLLSLIL…	hypothetical protein IF2G_10845 [Cordyceps javanica]
TQW01650.1	MFSLAMVAVLTWFTTKTLACYPGTYNCSFDYNSIKVCDGNHNDMVAMLHLGSGMLYSSYTESYLRLLIGENQCKTPMSYTTYVRCCV	hypothetical protein IF2G_10847 [Cordyceps javanica]
TQW01660.1	MDSDHTAFLRVPAIKELRGAENWESWRLFVRIQLQAAGLAYLLKPPPDGQAEAAIQKRAKDELKALAFITPYISPQIMLDLSRQGWQPTLPLQETMSMLERMLSMVPETSIPELFLKFFSMKITPQQGIQKVLNTHDEILAAFRIRYTTLDALFNDMSATALLQALSDHYPDYHRILETELSRDTKLDSKRLREWYQRRRNETPKATIFATLPAASPASTNDDRWCQDYILKFPGRRSRHTPEGCWIRFPHKKREYDAQKAASRAAASKSVGTPANQQKEGATSYIPQQSPGPGTDRIMKGNAFNGTAFAATAMALSVNEVAALPLGRNSIIVDSGCNVHTFNDRAWFSELTYLPKPRDDQLSASGHNMLCIGVGTAVVPLVTGHSLQLRNVRLVPDAP…	hypothetical protein IF2G_10801 [Cordyceps javanica]
TQW01662.1	MAHSTTRAMNAHEYKSPPTSLVVFQDAETKVEGAKTSPSSTVPDSDTEEDEDVPSTGAMVALMDAQNTLERENNSPGQLLQECSSHHESKEDDEDQGSLALQHRL	hypothetical protein IF2G_10803 [Cordyceps javanica]
TQW01664.1	MDKVDTLELVRRRANAPLEGCLTNEAQTFDIQLAAEVFSLGHRIFENTSRACELRSAGNSNVEHFQLCHRWSSLPYNSSITPIMRLEQVSLWFMWSVCCGLHTSQKRVALYNACVKVHRSRGFEEWSEPRSFKELVTLTAALLLLQYAACTQTTMTKLTLYSETSSPSLSPSLFGFPVLPLPEQEPLTQQMGGTQQAHDYLWRWKSYQIQHGLWQWNPLPRLEPNGEPGHITYIMACFAWYVEYYESVREGRAENHRSRNRAELFLSTLIKEVCNMRRPDVFCRMLSMERYVF	hypothetical protein IF2G_10805 [Cordyceps javanica]
TQW01665.1	MSSLSSAAAWLLSLMCALEFIEMEVGDEGDDDAVSDSDEVDDDTASDDTAADAGHEVDDEKRHSVFMSTVTLGFVDILKQSNSLRSGVRIYKQGVQTQGSVASIWEQLRAAGPVTETQYLRFRQYMKARLTNLISHSKSAIWIADFLTETSTIFSNAGGQISNKPLRDRLKTVSRFLEVVTDLGHVGPLVVSAAGHRLNRFAEITKIKEKDWNTWRESTQRQLHHLTAYIRLLLDPQAAKDIKVTAIDAVSYCEETHVERATLHESAVLSHSQLHPKTARPADIRFACHCEKYKAIRFTNMPIEIRRPHQPTTLEEPRSGAEETIEDSDTTEVSDPAATCRTAPRDSTASGTSSSTADLTQPRMFGEFPQDDSLWTSPNPYDWQHDWGIDGDSIPATSG…	hypothetical protein IF2G_10806 [Cordyceps javanica]
TQW01666.1	MNHSNELYVVYTCNRTEMRSLLDNIVKCLPSLTTTVQGEAANGKMLHYDETSETRSLGTFIHNNVSFAPDDD	hypothetical protein IF2G_10807 [Cordyceps javanica]
TQW01671.1	MRVVSFSLYATLYVLPFTFAFATPVHEKIVTAVVTTTICPISAARSGSTRTAYTVVSDTPTSTKTTIESTEPERSQGPHATSPSRQVSSTTADTATSSTYWATVTVFNILEKNGTISDRLSEATTNVACLNRGHNSTLATLASHSFGNFSRADTGSHGMFSGTSGHNRPTSLSTLPFPTSNFVSSGVSLLKPWYFVLMMACASTL	hypothetical protein IF2G_10812 [Cordyceps javanica]
TQW01677.1	MFSLVAPGILFLPSSSNCSSFAPNGIYLSESIPVSGITMMLVFCACGRHRGRVAPATFVSWSLYGDQREPCCQWRISPKTKERYEDLTSSANYSGWILYRARQACTHAKCYMRLLIFE	hypothetical protein IF2G_10818 [Cordyceps javanica]
TQW01681.1	MQPIGPPDYALVLVVWAFGAAYLGFGLAIYYSPKRERHALLNDGTSFLKYKIIIYLLLTSLLMISFFIAYGGTRNQPLTFWLYNAWRLSIGLCCHLSIQINPFKEGCSSFLIAGIYVLLAVAVLVPGFRSYVVTERQWLWLFMSAQAALTLAISLSHGSDREYSKHVYFLLVILVIIIGTGLAATIVAVEKAPALQRIQYACQSTFTLAALCAARLTSLINIQNNSKANREWASLPRQPLSAGNSRSRLHCDHTTCLGLCSRSGSAHELERTTTHASSSPARAVTLV	hypothetical protein IF2G_10822 [Cordyceps javanica]
TQW01685.1	MHLLQPRLDLLHTVTVYNEKHLQGQFNPYLSLLYMYDVSVSLIPVSTQISFPSDTHPSYFHYKMRTGSKFESSASKLSIVTLNVGTAAFGLD	hypothetical protein IF2G_10764 [Cordyceps javanica]
TQW01688.1	MFDASIRLQRCQGEKWTVDSASVASPESSKLVQHQHRRKPRHPKKNVVVDVVFKPLMDRSFQ	hypothetical protein IF2G_10767 [Cordyceps javanica]
TQW01706.1	MTLAGRKNSSLIAHLAACTDIFYPSKRLLNLRTRQPRPSILFPPPPCPR	hypothetical protein IF2G_10785 [Cordyceps javanica]
TQW01725.1	MLKLRMACAGSHIIAAGTRARCHSHVIEVHQHAHIPPPVWCLSVYTRRGSPTNLVAPFYDRFTNCGATLVAWPSRLYALDEADIEPLCHYHLSLAFAPGADAAANDCLLKVDITRSLYHTLHIRTGNSGATMERVHPVQELMRPLEESRAVRHSITFPPRHPVDFNLLHIPAGRCVPCHSR	hypothetical protein IF2G_10707 [Cordyceps javanica]
TQW01726.1	MSPTPSPSSSKTTFNRARHGLVSQSGPSNTIPLRLNAFECGNNRKDEEESLGDSEPSPISSEPACEEQAAPSSPGEAPSEQALPEMLQCTGYEWETDTHVLWLLIKPADANEPPLHIREAHVHHGRPRWLLQHWKNNERPVNPNHSELFEPLRIVRAQEREGTPGFRVQFVGFDASKKNLGWLSEDDIAQCALGLLDEYQAQPDVSETKRTRTVGQAGASRRRPGRARRPRNPDAP	hypothetical protein IF2G_10708 [Cordyceps javanica]
TQW01728.1	MPAAAGMMRISTTLLVLASALLAPSYSEPAEVSTSVIAQARRRHVRINRPYVVRGYNASTSATTLSSSSSTSDSTVADSQGQPSTVYSDTSTSAAVTVTVTLSTVDSVTSVDGTSSTSPRTTETEREPSSIRGSFPTPAPIVTTTEPMSTSHAEEPSSSALSTSVSFDIPSPEPIVTTTQSVSTSQTKKDLSSGASLSTGSFEAPPPVTPYPSATATTFDAESSARLSDDQSTTALSGLPTTLSGSSVLDVVQSSQSPKPVTSRSRVEESTFRAGPVSAKKDIELSLSLKISLSMSIETSSASALTSEPEPSSSVPFRISQSAKNGSSPAEQTQTSLAPTEAMPEGTSEATSSSTIGGGKTSFFPGSTSRLVTTTAVKPGSRSAPGPSALPTDPVADPP…	hypothetical protein IF2G_10710 [Cordyceps javanica]
TQW01730.1	MFRKRTDTLFKKAKELHENTGAEVYVLFRDKNATTWADDSHHGFDGCAFGDEAPGNIKQVLDQVHGNGRRPRKRGPKKGARAARSLAESYSPQGQHSDFVDADEQLFYDLAEEDDPMPDPMLDSIPDTTPDTIQVATSGALPEVRTEALSRSALPAEAMQYDVSDADQNVTVDCNAQEAALLAGLTGVDSVPDVLLDQDRPYADAPHDFEIGPLGGFANVVQSFESPQLYGAPSAVAPQDSQFVACESFSDLFPPDDDQLDYSTLLFSSTDEFSDFLTGDQYSSVQRETHQSDRLTEGPWREEMSRPLSAVPSGYGPDFVFAMENLLASAPYGEKMRDEASAAVAISLDDLGHASFKGLAGDSNILHVSQKHARHSAFAALAQERVLFFQRLQQSPSPT…	SRF-type transcription factor (DNA-binding and dimerization domain) domain-containing protein [Cordyceps javanica]
TQW01731.1	MAATPFLTFCEPSSSFPGVPGVPGASGVQVTQGGFLDPREQKWYLSAATLPAASQPPYSSAGFASSQDGRGPYAPNPPTGPAFTDHRPEYNLFEPASSAGPTYDFYSTNLGRPPSQLGGEFGRSHPDVGGLDQNDKVKDLEGAQHGADTKIRQLEDKLRQMEDKLRQMEEDNRKYGELLCRACEAFGKPQGSNSDTKKLFETLEAKIDDFLGQPKATEGSDHAN	hypothetical protein IF2G_10713 [Cordyceps javanica]
TQW01732.1	MDFSNVLKFLTKHRWIFVGATVHVVPLVFVIVFACIGRKGAKDEGLFRYVLSLDGAHARRFSNPLGVLSQVASSVSAVATAGAQEAQDYGQKLLKGLNVTASVGLAEGCVRVGFESLATATISKCTPFTKLADLPKTCAILLGLSSLSLASAYTGRALWAAKDSCRKWVVPALCLGSCLGSLAAWLLSLALVLVALSLYDLVQNAADVAHGPAWAMCWAICVAASVHVVGTLILARLTCHSWREDLPASTSVASAGCQKEAGSDTANPDASPLLLPPGLRN	hypothetical protein IF2G_10714 [Cordyceps javanica]
TQW01733.1	MALLHDRRVTAKQQKACARFVAAGFFKNPITTQVWYSSHYGRRTLQNRSGESLPDFGARYNDADGPRNFLRDWQQFCTALEDPSHKLRAILDGVLYLTSRVTRNSVEDLRSEALKFFDAHESRRDLETVLRNEFPPGEILSLGAWDSPRLCFAAEGSATLGLPDLIARIVRRYTAADRSAQLLALDGDHGLRTLNGFTRSWMGSCLLSSDPRQQLVEFSEGVTFLIEAYTGKPSALCGRVKIRVHGATPCLGHYLGMAQLTAAVGVGLMQAFIESDARHTERDLRRTKYARLYVPPKRQASCEVGLLAMVIAVRDEFQASLSKLLDRFDRAAGATDADHHRWELEWCLGRRLMDRVRQTNLPCARAVTWDYQPDRLVKSGDGVVKRYIVVKVLFRDPTI…	hypothetical protein IF2G_10715 [Cordyceps javanica]
TQW01734.1	MNTAISQNAAAGADLLSSAIRACQEYEGWHADWLAFASSQEEENKRLTAELEAVEGRKKQIQEIREKQERMVEAQMDLINTLKRDIADMEAEPLSPGEFLAVDPALRVDGLDSRPCSPSPSEGQAAALLLEHVGACR	bacterial type III secretion protein (HrpB7) domain-containing protein [Cordyceps javanica]
TQW01735.1	MAESDPKTSGKVEDNVRKPSAERTTAKEFEENVENFRTERLGQPAAYQEIFVVTKILKATQNNESHLALAWFLSCPKRREIIGSFELIPKNGRKPNSALLKAAQKLRSAIKDMRTEALPTDYRIPTESTHCEKCKKAVIDAWSDSEKCYACTGSRSQAEMEKGKRPASPTPETKPEQAVKKPRQRDGDKKVRPAETPTLAPEAAKATGTSDGNAEITIASANGKDGKDGKDGTLPPKPSAPARAPSQTPDEKST	hypothetical protein IF2G_10717 [Cordyceps javanica]
TQW01736.1	MDREDYQFPTAHEMDTGISDMDDMEGALDDYQQNLEDAGGNNAGGNPPADNPPAGQAPTGTAATGDTATTGGAATTGGAATTGGAATTGGAATTGGAAXXXXXXXXXXXXXXXXXXXXXXXXXXXXXXXXXXXXXXXXXXXXXXXXXXXXXXXXXXXXXXXXXXXXXXXXXXXXXXXXXXXXATTGGAATTGGAATTGGAATTGGAATTGGAATTGGTDTTGGTATTGPTQTSYQADDGSTRYKINPLKLLPMKVNSAIERLCRDPGTKFVGVYIEYAQVSVIRVIDNKKFVKREKQVHRVFRVYKRKAWHFLREQRGELSSKLAVIEEGPLVDQTDMTEFGKIHPDTPIELVGIEAVAWETEAQLLEDKDVGEMMEVQLRAGRPREIGEIKAIIRPYL…	hypothetical protein IF2G_10718 [Cordyceps javanica]
TQW01740.1	MCDPAWSSRHFKHALSPSMWLLASLEALIFNQPPLSDAYIVHLPLKTQSSFSLLRTQAVKMLSTDYGEERRRQDVAELRLILVVQQTIDYQNSCLRQLLHRGAGHTNTELEFLSRFELQAGIREARLMYCGEGITTEEDSMACAGQIDIVDCATAEFAKEDLPKLEELVKNTLYGHRKNHQVQAI	hypothetical protein IF2G_10722 [Cordyceps javanica]
TQW01744.1	MAEFGAARSRSRYQAPEHITEDIEVIDLTGSDSESGIHTLPSLRRERASLGLERSSSSNAATLHRSTSGTRDDPNWSLYCARCNASISDTAVLRACGCVSAFEIESCPVLIRCDQLYCSTCNKNTAERWGKSGPSRRADDFPCNILNHHRIAPQTGRKIRGLTPACPVCWEPFYPHSVLSTECHVFHEECIMKILRKRWTCPFCAAGAIGTELWRIKSLGPLQETPCGMLKRKSGTPERSGSAPSRKRLKVEGAYS	ring finger domain-containing protein [Cordyceps javanica]
TQW01745.1	MFLEDLLAQFKLPRAIDFVRLPTKTIKQGRCCSGSRNVFMSLEGRSLISTSDCSRCLESLIHSVCLQLVITILTG	hypothetical protein IF2G_10727 [Cordyceps javanica]
TQW01746.1	MASQQYDLPVHTQHLLAILEGYSFRINALRQRANALATDNIELKKKIEDANRQLEFHEGEFARQANLIDCQDHHIRTLDDIRLKSKGYSSLTVVQPSTVYAPYTALHTSKDDDMFPN	hypothetical protein IF2G_10728 [Cordyceps javanica]
TQW01750.1	MASEAIHTLSKAIEQAKERFAVLQADDLVNVANSMAALDARSTEHEKKLVEIGCKMDEIKELLSNLVSRLDLSEKAAPYARTLDLVLQSSGLWSTLKTNKKKKKITKMIKQARGLEQLGMNYGFPPRYPKDGVFSFERPSVVEQNEADGKAADLTADEQ	hypothetical protein IF2G_10732 [Cordyceps javanica]
TQW01752.1	MASIAGVVLWIYATQAESYLLQHLRHHVLPSDLSCE	hypothetical protein IF2G_10734 [Cordyceps javanica]
TQW01754.1	MNQGRHSDVDSLSTGKSRPRSRLSLVDQIPQMPGKDAPSAFLASSQAPTNVRLLFITRNLGFKITPMGRTYQRTTSRMLPIGLGSKPRSKIQLRRFEPLLHRALVW	hypothetical protein IF2G_10736 [Cordyceps javanica]
TQW01759.1	MFGIAAPRVFFPSRQGKGISFVTKITPASRLRPSVYIAEARTSIRHTILALELGCCHCQKKVNEMEVVRSHEGTLFHSSCAREIWLSRKAP	vacuolar sorting protein 39 domain 2 domain-containing protein [Cordyceps javanica]
TQW01776.1	MKAALSTDNNHNADQPTGHIDARTRNTETSENMQTCQTRLNPSLDQQRTNISTVPTAAIDNIVFGVPEIRTFFDTDLPGMPEELLDALRLDTSIPVTLALRSLIIVSWRKCDC	hypothetical protein IF2G_10758 [Cordyceps javanica]
TQW01779.1	MLDDLNFPPAEQYLTRGSESFAMLDDLNFPPQSSLSGRNTHPRGITQAVLPDHVCGMAPGETILTSVFGCESASTIATIASARFTSNSVALGTFLARITVETVC	hypothetical protein IF2G_10761 [Cordyceps javanica]
TQW01780.1	MPSATFTHDLFVVSGCTAALLLANIALAMKACPPWHRGRVIRGATATLYLILLTVGTVLLAVDLVSVTRYQLCRGIITSCLAIPQVWAVHNIATFHRIWMAVAVGLIQLLWVVAGTVLWQSQVLSVSLGLGHLLFGLIVTDDYLLNWWDSNKTNNLITRRSTLSRACLHGVTGLSTINFSYNIC	hypothetical protein IF2G_10762 [Cordyceps javanica]
TQW01782.1	MNSSNVFYPRTQVELPGKRLDCVIHRPTQPKSTTCLEYMFLAYLDVPDTSSPIDAALPLNLSLSLAGKRAEAELSGNPARLPSLKKAPNDEELKYFSSSFTLTGTPGRASPPREGGGRP	hypothetical protein IF2G_10630 [Cordyceps javanica]
TQW01787.1	MASPLLARNPERPSCLASVTSIFHGAASKQETKRKKKQRNNAIFLVTPWLPFPSPISTQHPPFAVGLPHGKTNVPLCTLAGPRCPLPLVVTAPRLPSLSLSPALPLFPPPVLLLLLLLLLILLYLLFP	hypothetical protein IF2G_10635 [Cordyceps javanica]
TQW01788.1	MYAIRSYKRETRRHFIYSTVVQKGKEEEKITSISLRKKRVGENQKGPAIHTPPSPPPPPSSPVVVVVVVVLQATTAALWSGHSISTATALFSSSSLLVVVFDCPLALSFPPLSPATMGTPMNLCRARSGGMDG	hypothetical protein IF2G_10636 [Cordyceps javanica]
TQW01790.1	MRAQKGAEGRDGDGREERAAMRCPKETARVPRASPCRARDPVRPRSSMITLVTRAFCSGCFCDSQKTSARTHIHIHGCPTSDTNNSHIRTRKALPEWTRTLSLATAFENFWDKITPPPPPPEWRAGANARDEVGGCEICAYRYTKRPKERHIHAHANMYIQGGAITVIGIRGSEAERGCWGLEKRIGKGRGRGGGGGGGGRVDACCFCAKRRGAGRAGGRAGKMSGLGRVMNE	hypothetical protein IF2G_10638 [Cordyceps javanica]
TQW01792.1	MHAQDEILQQSLQDPEAFWARQAARLHWHRQPDAALRTFDKTLADGTTTHASWEWFPGGELSTCYNCVDRHVLAGRGDDVAIYYDSPVTATKERYTYRQLLREVETLAGALREEGVNKGDVVMIYSKFTLTLLSRCSLAISL	AMP-binding enzyme [Cordyceps javanica]
TQW01810.1	MRARHPRCTEAREPRLLRRTGKKAMCLVTVGLQSPSGVPGIQGIHQADIPWIPLGTTQ	hypothetical protein IF2G_10658 [Cordyceps javanica]
TQW01816.1	MLGDLTATVNLAPHRDDCTVLMPNGQILSPNTHTSAFLQTFEIGDCSRNQVRSVGGIWGCVEADHLGRRASPRASIWSLPRHEQDCYGQVSGLAAILRTNCTMA	hypothetical protein IF2G_10664 [Cordyceps javanica]
TQW01822.1	MDLCFLQGSFGSSLPGRSDFVKAGNSESRAASSQVKAFRASSRYNPSSQMATRTFIHLLPLSLFLYFLLFLFLSHPLNVTVIGAPATQSTESSC	hypothetical protein IF2G_10670 [Cordyceps javanica]
TQW01833.1	MSTCARPIPITAVPSISLHAPQLSPSDSFRPKFRGAAVVNPNHVEYSGRGFLPSCFLWQVIKAYTVQERWNTRVCRKPPIAFSNSQLFGSRAGVGRLRADPPEMLLTRSRNSQRSN	hypothetical protein IF2G_10681 [Cordyceps javanica]
TQW01838.1	MVAGRSTITLIDGGTVVLASDVGKGSEEICSLRFLRSISPFASACSRQDRTSPCECLYESASSPW	hypothetical protein IF2G_10686 [Cordyceps javanica]
TQW01848.1	MVPTLKVEALQEVVLQEEALQVEALQVEALQEEQPDQILTGRCPATDLPLHGSKSPFRQYDAIGRMKVPHHHTMKASTTILLVAQTLLTVASAANVARVPGEMHAPLIRGDPPPYHPAHDKRGDPPPYHPAHDKRGDK	hypothetical protein IF2G_10696 [Cordyceps javanica]
TQW01850.1	MRSYADLRTDFVSTAGRKSILAAGSGPGSWPCPTDSDGASKPSHSGSSMPMFSDDETATSSSETQEALCEMTTALKRQKSSILAQKTSQIADEACIVFAIHYANAICNMHDSALSAIIPDSKLFSSLLGADSGASFLQSIPRLCQAIEYTSLGEQHCRIWKRIAMAHFFHSYEYAQKNSHSFFGWYRNHQSNMLPPKGSVRSMVAQCFANLMLRPANAAAIDSQKSRLNKIQTWRKCGKPWAKLITSFGCGILLLIPMSLADEE	hypothetical protein IF2G_10698 [Cordyceps javanica]
TQW01854.1	MRARQKRRRFPRRRHTAPLGPVLTDTVAADESSQSGSDSPNARQDISSQSLPERESCSENSPTETHMVEQTDTDASQGRSSSVDEPLDKGTQYAGQPPFPESRHAQSSDCSQVHESETKSGLASAIADQGSAVAAPPLVEAQTDEPGKDATVSEAWWLDTKRAVKQTPPPPLATQPPPAQQPSPQPLPPQTPPLQTPPLQPFPPHTDPQGSLQYSATQNGPHDRGLRSPMPIPLLSSAKAHRTTYQPKSGTNTRTTLESPGSKGSGVAPVGYPPQRKSGAFTKTCEQARSVGKRARRRRRAAAAWQKKSQPQRTQVGGQASHGVNRESLLDLISLVNTLRGRSLYRSNGQMPPGPPASVNHPAVTKIPRPLPLQKLRPGYAFPTAVSASMSAPLPGDGP…	hypothetical protein IF2G_10567 [Cordyceps javanica]
TQW01855.1	MAVAVRTLLDQCASSIAGMLVGISAMREFNTNGLHRYTIQIQRRRTYHHIHVKLMAATKPKRAAMHTAGNALAALAHRSNTLPAIFSM	hypothetical protein IF2G_10568 [Cordyceps javanica]
TQW01859.1	MESTSKEARVNLALVALERNPALSIRAAAKIYNVPKTTILRRRKHQLARHDTVPNSRKLTNLEESIIVEYILDLDSRSFPPRLSGVQDMANRLLADRDAPLVGVNWASRFVKRQTELTTRFTRRYDYKRALCKDPKLIRS	helix-turn-helix, psq domain-containing protein [Cordyceps javanica]
TQW01882.1	MLDFPAKMFPLDSTVCESIQISVFVWCRCKYRLTTLPSYGTSFGTRKERKWTMTWSGRAKVASEEVNEPKYGGASAHILTGL	hypothetical protein IF2G_10595 [Cordyceps javanica]
TQW01883.1	MFLCQTQTQTQPPIFTLSPTCNCNADCSATPTPDGVSDIRNLTRLEAWLMGALLLIALCILRLYLGQRRGREESSVLGMRYSHTPEEFRVSPRRRPLEALDATPHPLIPLETVNPNIMYPNAHSMTSMTERYQMPCAPLAGPRRHLCMSELHVHCHA	hypothetical protein IF2G_10596 [Cordyceps javanica]
TQW01884.1	MSQPWKSMEDDRTSVEATNASRAGREWEQAAPFSGAGAAESHFAWMAGGEIGELERVDELVQSAPCLFSNLWPSL	hypothetical protein IF2G_10597 [Cordyceps javanica]
TQW01888.1	MTNNSECKVLGNIDAVKSSIFASYEWVDEIHRLGSKLVFYGIDLVSLTDGLEDRLSGRCTKTAYIALDLVH	hypothetical protein IF2G_10601 [Cordyceps javanica]
TQW01897.1	MNNFIRCGDDNIPCINRQFDLCGKHSSIEGKNKNKLPSLPWLSYCENAFVEATLSRGTGVQYASCVIFDAMEPSPNVAIALSTRHIAHMAIRK	hypothetical protein IF2G_10610 [Cordyceps javanica]
TQW01900.1	MNRALWLPSGVILTTPLGTIMDCGIECQFSMDWLICLHMKSARVGIVASSKAYDMRQEARLCRGVEKKCRGREGKAIMAHTLCKYLLVHFAGLFGL	hypothetical protein IF2G_10613 [Cordyceps javanica]
TQW01935.1	MIDQQPAAPTSKLQGRAPLVGVRVRGEARKRPASSHSFETGCKPKEGHEKKNGEESASRRNKKKKRKQKKKPERPRQSIHKHTVRGATTIRTRRQTTHATRNNGLQPRNWLFSQRSCFQSKEPAEELLP	hypothetical protein IF2G_10506 [Cordyceps javanica]
TQW01936.1	MDANMRFAGVVRWWQVPGSTGDGIQQGLMKETAGDRLSEKDASPYIGVAIHNELYSALSKLGNAAKRGSCGGSLLPVKVTSCDSFFAESWDSTADTHLSPPWWLSDMCFAQYKSGAKALEMRPGRAARWRWTINRGVVCTSN	hypothetical protein IF2G_10507 [Cordyceps javanica]
TQW01937.1	MARDGKLYLRSIDSQGHCRNLPSHLEASWPCCHWSCGKRLEIHTPARLTSNVLSRGNSSPGDVKTN	hypothetical protein IF2G_10508 [Cordyceps javanica]
TQW01956.1	MDFAVAIPISIDSALWDMMPMPRKSASRCDDYGCCLGVRPSRRFARVRLFAEWAPRVAIDLLHGAQISLLPTDLLSMRQQPCTVPLLRIELVTTEPHSVNAAKRQPIEKQSIDVGRLKTASGLCCLFNPSCGRFCLFPQSAMVFSDVKLRTHDIERHSRRAPKMHTTARSSGGCGRMGSDRQGLCAIRITVCCQAHRGTSLDLGLIGSKGLDATVV	hypothetical protein IF2G_10527 [Cordyceps javanica]
TQW01958.1	MSQRTLSASCLCRTCWPPWRAPSSDGLRSRKAMAWVAEGAFGVTIHASLCVLPVLLGWDVGREMDNAACQIPIGVVSAICVAMRATFWRKRGAIDGAGTNIMMTELPVVHELTQIDCILSWVSFSIFSSLLVLEIIIMIQVHAATETGSRFLLTGCQRQGMPCSLVSLSLPAKGLVN	hypothetical protein IF2G_10529 [Cordyceps javanica]
TQW01966.1	MWHRPISSGKRFYAASNTVGRSKRWGAGFLHDRGLLLGGNTATNPLLDEEPDLPTNHVRPGNTSSVPRRHFAFESLEYKAIVPSDLLNALNSTYIRQLLNSKEPSKSEFCTAWVDAIRSYWVAATRATIHW	hypothetical protein IF2G_10537 [Cordyceps javanica]
TQW01977.1	MFTLPDSSSSSITSSHLVAELAIGSAQAVAVEAAFPAAGHAEIGYGGLLAIEAVAQANATLDELVAEGLGLHVESCTCQRLYWNHR	hypothetical protein IF2G_10548 [Cordyceps javanica]
TQW01978.1	MCDHTCPPEVRAFLHLALETEAQSRLDATGGRQLVRGHKSYFCPGTQHRCQSFRHHQVSRYNQPIIPTNNCLGSPQKQVFDAKISSTPYYVPTHALPRSAAGLPGSRAAVRSGRDVHDARVGSSCCTHHLEPASQEKSFQGRKLIRKPKKKCPRVCVTRKGTVDVR	hypothetical protein IF2G_10549 [Cordyceps javanica]
TQW01984.1	MGSALQYFRVSHESLRKSPVEAQAGIRSPLRIPSAARRGFLNASQLKNVKGTVQIFSDPILRRSHIGLRFDVNRRPRCCPKSFHRQRQRLPTMERWTGNLWTAKRPHTIEHRLLPLHKDLYTTHWGHLYQNPPDKRGFRQKTDAP	hypothetical protein IF2G_10555 [Cordyceps javanica]
TQW01990.1	MTSYTARIGTVRLPFRDTPTTQRTALECHRQPSRCWPWMINHHFAKLTCACNMLITFQKAKFGRVTRILPRRTDRV	hypothetical protein IF2G_10561 [Cordyceps javanica]
TQW02006.1	MLPCNASRLYPSHVYTAPLSYVPVLSSSRCHCLQSNSTSSVLPHVEHALAAAKDKEALYTNTAVRMVPEMATPSSGVGSSLPPTNSSCPLRYTMASTDRITMANTDTTVLGGRKRGY	hypothetical protein IF2G_10406 [Cordyceps javanica]
TQW02024.1	MPARRIGCLMPSTLVSSAVMGPVGAIVSVFVLAMCYFESTVSEGWVRSPLPKRVPEGRGASGCVFLRQRVG	hypothetical protein IF2G_10424 [Cordyceps javanica]
TQW02038.1	MRTPSTHQLLVTSSYYYEWHRLPLTKPGSPRGGGGGEDGEGKQRGGLHAAEKCELLLAAYSLLSMNLFIFVFLFLPLHANFLPEAFAIAPSSFFFLLFSSPPFFLAYTVENAVPTMGRFTDFVDREREARLVFD	hypothetical protein IF2G_10438 [Cordyceps javanica]
TQW02041.1	MHVTGELYPRDAVINSRRGVGIGPARQAAGGAARIREGQLQDISLLTTNYDDQCRNEASLVVRTGVKEGGGMDEKRRGPKTARHVQADVSILLLLFFFQTRIQPSSPFFVLRIGKTTHSSKLSKWRL	hypothetical protein IF2G_10441 [Cordyceps javanica]
TQW02098.1	MKIGSGTTALMSCTRERGRRFSQQQQRLARALRTGAKATVRCLGSSAYGGGRSKRPGGSRIS	hypothetical protein IF2G_10303 [Cordyceps javanica]
TQW02124.1	MESSSLPDITAVMGVSGIGDESWEHAARRSNEPSLGSHAAPGLPNPVPSSQYSVVMYEYNGAMTLLRFSDRDFPIPGDFVSGGRQGGPAEALWMDWTGLVDELMCDGGDLGCQHMMTQSSGHGRRGGDTETTDTASPGEVPCTRG	hypothetical protein IF2G_10329 [Cordyceps javanica]
TQW02125.1	MHACHSSLGLLRAPPGASHPCLPSPFLSAFSDRTAYEPLGTPVPRRCAHAYARSGHPPKE	hypothetical protein IF2G_10330 [Cordyceps javanica]
TQW02129.1	MGVYLNRGLLGSQRIGDLGGTIGHRMRASTTSSTGIPATDKAAVYRPRALGPKAYGTRASPGRLIQGRAFLLQLTGQRCARTAAHDAGGAGGSMR	hypothetical protein IF2G_10334 [Cordyceps javanica]
TQW02130.1	MIFFHCKDDPARSVGHAIATTGFVIPHSCAESAATWACWLCTSAQSLKISVISKRVDHSNSMASVTHNNQQPQHLHQLR	hypothetical protein IF2G_10335 [Cordyceps javanica]
TQW02132.1	MGWDANTPNFDWVEMVQHHEKAMTPVGRGGCCSADNKGACRAGVWLEWRWSGGYLCRYLALPC	hypothetical protein IF2G_10337 [Cordyceps javanica]
TQW02154.1	MATFSNGNRLGGGHPSYPQGSCTSCPFFFVFAALVRVREWELVCVVLVVW	hypothetical protein IF2G_10359 [Cordyceps javanica]
TQW02161.1	MTTTTGFGMGRGERGQLRKTRRELQIGSLKRGPRWARRSVAGEVCTFKRLAHREPSEAY	hypothetical protein IF2G_10366 [Cordyceps javanica]
TQW02162.1	MTALRMFVSGFLLVTTRKAECRNMTPESTSVREPYKTTLVLRSYKYIKHGKGLGLVAGGPRDHGCEDEHPDCSAVQRVHGKLLSADAIARHDVYYLMVCKFGYLDRFVARSFCGGGAERERQGAKARSVWRVTFGYIVLLAQKTNRGRRNVQLPSPLPKKKHVAVCTKQGDQARTAWAGCIDVELVLYCRRAEA	hypothetical protein IF2G_10367 [Cordyceps javanica]
TQW02166.1	MAAKSKWFLLAGAGRASRVPTWHELVTTIDSIFPFHGRVYKGKKGLVSWLGQGGVAVMRLAEYASFNASSMFMCSISSLHCGGAAQRLVGDLARASQYDTQRASGGDFVATCTLPTLYVSISMHYFEQSR	hypothetical protein IF2G_10371 [Cordyceps javanica]
TQW02173.1	MKQSLALDNLAWDKVNGDSEQASIQLRAQVVVDFQFASQKRSDALAVGREAMQRDSFNQLSGPACFNMCMLQCYLTVVEIV	hypothetical protein IF2G_10378 [Cordyceps javanica]
TQW02210.1	MPDLVLQSEKNCLADQIQSPQAQQRKVLQETMSVSYEPSMIRLVSESRHVRPLVVTLVTLKTACHENDDDFRRPILHFQQLR	hypothetical protein IF2G_10218 [Cordyceps javanica]
TQW02214.1	MQPWVLYELFDVLTSIMCCLYLCIRAHTNGWWMWPMERPAGSQCVNATIFTAVQHPGDIVCKLMRCLSRLLDLFYCLIVSSRHLSFQFVLTCLDRTLVRHSYSIGGGPASRYQVSVGVRKRCRITTSRGLPSFGDYRLAERLISGMIETR	hypothetical protein IF2G_10222 [Cordyceps javanica]
TQW02217.1	MFSSSTDEDISSQSPVAQKLSRHLMYHKRLVTWFAMRSRRLALWPTAACTTMSHPTLAKIIDLDLPYTVASRTARPHGRRGAVPALKSKNGMRGLN	hypothetical protein IF2G_10225 [Cordyceps javanica]
TQW02224.1	MPWTSNGKAKCPGRLSEQLGRLLASCCALNAGRRNTERARGVGWCCSRLRDHALTRNSSQMYSLSHKFTLPGCCTPYAVAAVVAMLECEEPRPVYTCRCPAPQPAAPLPTGRRL	hypothetical protein IF2G_10232 [Cordyceps javanica]
TQW02227.1	MALFVRVSRYPTDFQLDSKSGRGSQSVGSRHGCLVTQAGRPMHLHQQTSAVPSRLAHQKGRCGRPWLPGCVCSAR	hypothetical protein IF2G_10235 [Cordyceps javanica]
TQW02253.1	MPKRGCEVLGEYNKRTRFARGRLANKPGCVGRRRSTSVKATESGKGPKELTRPGTRPAGTLPPGFTVTRGKALLELSE	hypothetical protein IF2G_10261 [Cordyceps javanica]
TQW02254.1	MSQSIQRSEPLPSSSASQSPPRSSLTPSSPPPPLVTRRARSDLAASASLPYYACTNWLCSFAVVMFTPGLLRHQPLGASISSSRWSTWWWPSPLPTSFVRRRPERHLEEIDLIFAKAHNRGQVTVPDCTADAKAA	hypothetical protein IF2G_10262 [Cordyceps javanica]
TQW02255.1	MAVPSPGRDSLTEYNGPACWTSCFATKCDHAMTRTDTGRFRSLLTGQGLVLLIYSSELTLCSIFYCFYALKVQSRPWTFLLARVERGRS	hypothetical protein IF2G_10263 [Cordyceps javanica]
TQW02294.1	MHPCIPHAPVDLCDAAMRQHRGMALGEGGRSQLKPGVSVVPCAGHPGQVPGLVLRKSTYSKVHGYLQGGPVPLLPSCREVS	hypothetical protein IF2G_10097 [Cordyceps javanica]
TQW02304.1	MRRRGSAGFWRLAPGGIPVAWFCPSSRARNTNSCASRPSVTAMPLPRRPSSRKNGRCC	hypothetical protein IF2G_10107 [Cordyceps javanica]
TQW02312.1	MQFTKIASFIALVGAALAAPAPAPEPVQVTAALTSSRWLRTKRKKKDPNTSGRVEVYCGNLRYPAYKWTK	hypothetical protein IF2G_10115 [Cordyceps javanica]
TQW02313.1	MQHVLEKHERPCGIRSMRSRRGPLLPRPPTARLTHFLHHTGNIPGQYFWASKVAKSKWFHAAKSCISSVASETMPFRHPQYGPHLVACLDSISLFEAASPCSHKKDIPAIPRIMHKASGILYRTLPSAVPPVAASGDSHLPSCGRFAAGRGGRGLIMVLPAGLSFPAYQRDFINSLTRPQDFAALRLAGRLVSEISAFDIKPITDYQ	hypothetical protein IF2G_10116 [Cordyceps javanica]
TQW02336.1	MCVFGKGQFKSWLVDVLVFIEIERMSPSDTKTVKGIGTLMKRSVDKMMTATGRPAR	hypothetical protein IF2G_10139 [Cordyceps javanica]
TQW02344.1	MRHSAGESGRLLAHHRLAWLPFPTSPSSPSIHPSIINHHQRPVFCGPKQLENAGPPPVIDWDDVYRSPSGGPAPRPTPTPAAAAKRETGPGVRAPASRESPDLQPAVPAPRRPHRLFGVPGFVGFPAN	hypothetical protein IF2G_10147 [Cordyceps javanica]
TQW02373.1	MVINMSSCMYMYILASIALFGTQSLHTPPSSRREKVGAVGAVAEMSILTY	hypothetical protein IF2G_10176 [Cordyceps javanica]
TQW02388.1	MKPSLREKLAARLEQQLDSLHTPSPSAAHHLSVDITQNLDYSWQLFDQAIIEQVMDPFWMRENSNQSAIPH	hypothetical protein IF2G_10191 [Cordyceps javanica]
TQW02390.1	MPQHVDWRRIPCAHHSAEKGAQCVEICADPRLLVSASSRPTPFERNMCFWAILCARLRRSRTNSYAEIERKWKIARRKKDGVMSGARCLRCSLRSVGFCAATERE	hypothetical protein IF2G_10193 [Cordyceps javanica]
TQW02398.1	MLHFFFFFFVTRLGWCGADAAELMMMMMRDHEIACIWVRLSTTKGPETKFSVVQVLMIFGMGVDGIHVVEGIAGLRCAVSGLTAVLVVASPGS	hypothetical protein IF2G_09998 [Cordyceps javanica]
TQW02408.1	MFGVCSFCRLILDWADWHWLEAQDCVAHDVACLFLFNFIIQFWYLHWIRDTSRRTGPLPCWSLASQGHNPPGMH	hypothetical protein IF2G_10008 [Cordyceps javanica]
TQW02444.1	MHLKCEVGGNIARGENAVVSCGFNYRYPTAKARWGLLATCRRRCTFRPCNGQTGNFRVPTFIPVGSRGGGRFQNSFERMEGGVSFGMKLAIVASSFSNTLVGEKRKRKAQPKTPCLFGRNSGPTTNYTMKSSFAWFQARIEAMLRCLEKANYNTLC	hypothetical protein IF2G_10044 [Cordyceps javanica]
TQW02446.1	MRRRRQCSQLPIAAAARPCQFIKKVTTRRTQPAFLPFLRLLPVVGLLRTSLLASQRPPLPHTHHHIPSLAAIVAVGLTTCVKVCFITKRPILDYLIYMYMYTYKSAHLFAAQSATAPVLHGIRHPFFRSPSYTQASHP	hypothetical protein IF2G_10046 [Cordyceps javanica]
TQW02461.1	MEITFLPPRAFSPPFRGHPLPCHIRWDNARALLVTSKIFAQLAASHLTREVRFSRQEISSSSSSAARVLVHWYCSRNRDIDHDKSM	hypothetical protein IF2G_10061 [Cordyceps javanica]
TQW02463.1	MPQKLARQQSVYCRSALIRARATFGHGCDRNHSTLPGPFISGTHNRSNKGRESRPKVYLPIRTSPPLSDPSSFLIDKPIDRARVAEATAVVLASNANPLQNYAHLWPLLQNALWEPALL	hypothetical protein IF2G_10063 [Cordyceps javanica]
TQW02471.1	MVSGRCGGGLATNCDRVATGQGPCGEGWLCALDELRKEGSQKNEQGRREQRLLPSVGQVSNMAVSRR	hypothetical protein IF2G_10071 [Cordyceps javanica]
TQW02474.1	MDRMGRSREDCESERTYLHGRSREPRIGICSSRGGRQRSRALEVDGLAASYGREDGAAHACQLSGKSAKAVVCRRR	hypothetical protein IF2G_10074 [Cordyceps javanica]
TQW02479.1	MTSAQRRWCSLASVKHTHVRPVQEHLSYPLAQKITHHPHGCIHWSMQNPGRQYGLPTTHRSKVCCSYGPYQYGPYNPSLSRLVSVCCVIFCSPVPGFENRHAETRRY	hypothetical protein IF2G_10079 [Cordyceps javanica]
TQW02484.1	MVSRLATNTSSTFRDPPRRRSFSFSNKVSSRRRLVQLSIWSVRVFTALGLGNMSHSKSNAVVNRQLLDMLAAYLGRIRRRFGTSFLVMVVLILTWSIGFYSSLDYSQTGKLAKNHQAICRHHYRHPN	hypothetical protein IF2G_10084 [Cordyceps javanica]
TQW02486.1	MVVTSYSYVKSSAELQIKVVYFELPGSNGKRVSGLLNAFSICDRSLGSISAEPGGRPFEVIISVGEVFAKKIFSHGIEQIRCLVESHWRKARRTAQVDNLRRGRYWPQQMSRESQKVPCRFTPCRRRLSYVTYTRREKDESGRGQDFKRRVIIVPRMLTREREREPTFYPEYCYEHSAISLGVQ	hypothetical protein IF2G_10086 [Cordyceps javanica]
TQW02501.1	MTINLCLVLGSRYPNSNIWIIVGQQATPVESLRSRAAHVRAAWPVTAYFPSPSSLIAGTRIRFGRYGVDVMDICKLANQKALCDAKKGRQWSNSVTSAGSCWKERQQQRHSP	hypothetical protein IF2G_09892 [Cordyceps javanica]
TQW02506.1	MRRAALALRPEGQGRLPRQLEEEACKARIPRSRECRPCWHLFRRVYSSASQRLSSSPAGQAPTAKILSRRDTHTHIAYTRGGIAYLIPVSGPVKACIAKTILGLGGLLFSLSCFRHQHLSEPRGSKKKKCFSVPPLARVRSSPVPSSSETGKEKQQERARPCWKQQQWAGCGGGAGDLV	hypothetical protein IF2G_09897 [Cordyceps javanica]
TQW02513.1	MRIAAISCRCGCAHTLTRVWDTQWSGPRFYDCTLQYQTCSQPLATRCKSALGICRGSRKRPTIKAVFVSLLSGDTKPGLVW	hypothetical protein IF2G_09904 [Cordyceps javanica]
TQW02517.1	MPACVPVLARKWVWLCMIVCVYVCVCLRGRFGKGTVLVPLTDTAAGRKDGKATRTSKSRRELGIALRVGYIGQQRMNDESTFQPPKTRKKNRQGPGTLILFHPAEMVPKLRPLPSAAVETTVSCSLSAPSEPQSVPTACLVFFGLSFPPATPPPPLLIPARPFHRSPLAHLRTCLARPARPPPPAVAQSVGPSVTHSVTQSSRASQVTHSHCTPPSSPTPLLWALWLKELDTNERRGGGCVELGKGKEKSKSKKKNWR	hypothetical protein IF2G_09908 [Cordyceps javanica]
TQW02522.1	MVMIIIYVVIKRNAILVEQGASPVCAFRCVRHEMFLEAGKKEKGQIIGHSSTLPP	hypothetical protein IF2G_09913 [Cordyceps javanica]
TQW02525.1	MAFFRRFICRVQFGLVILRQRAHATIETKTKYNHHAGIWHLNLRGAIELPSMQSLIRKFASFHSSPTAPTASRLMLLHRVHTTCSLLCAPDAPPRAPP	hypothetical protein IF2G_09916 [Cordyceps javanica]
TQW02527.1	MCFSAARPHRPVAAIEPRFLGCGGLLLIKAGGQLEQRVASGAARVGPPSAARTCLQPYRAEPFAASTAPHITVRAPFIMLLFDVCPCTLARHCHCPGNVLDLSCPLIQSCHLIQSPVAPNCNCIYNHKTEQVMQSLLLSPSHARSFGHCFLEEPTGGYFYFPGQTKAGRDSSAPALRDGILPSSPKYLYQISKQSLWGFNKYF	hypothetical protein IF2G_09918 [Cordyceps javanica]
TQW02532.1	MKLDADRVSDQHLLEGFSFSRQVQIPLMQRLRHSHATTPVALKTTAASESIYRGESSGHLGLVICFFLQAPGSASAQTASLTHTRRQCCPAPVVCPGQPTPWNRKTDDTNQQQSTSAVHHWHTYGHPSCSASSPDPFSDGPLTLLLPCSPVGLGRRRGAQFASRPNLAANDWPTALRAAPQAFVSVLPAPPVAASPDAVVLFLAVFQISVKRGRGRHVKKRVRQGFPMRAAMVVLRNHDPGLHAPTTVELHMHTHSDI	hypothetical protein IF2G_09923 [Cordyceps javanica]
TQW02546.1	MVTTSTPPRLVVMAGQPSQPVNPTHPHTPTIKQSKQPKQPLEHTKKTVQPNLINKSHCAHTAAKAINRIKAQPSLHHHLPRPVPRTRRSNIPLPRATASSTASLWPSGGTAWTRPLTLSYSRIRRQPFASRTRGLVAPQRVRTQGRQAPVAEDSTRVDRPRNTTFEWQVPSM	hypothetical protein IF2G_09937 [Cordyceps javanica]
TQW02558.1	MKGNKTIQRRLTVDRPGSAFPPPMSEWQPTNAHCSTLVTAFAFSHSMGLKLLRFSCSEMA	hypothetical protein IF2G_09949 [Cordyceps javanica]
TQW02570.1	MFPVQLPSLTCALDCRTLLAGWSSSYPAVIGPRNGARGRFAVCERVEAIDKARPATSRRLTLACLSHLEKKKNEVPRLSIVCLARPSRDPPPGDASQRQHFHSRSLFKNLHPELTRSVELAAHLSSRSFHPVQKGRFSASL	hypothetical protein IF2G_09961 [Cordyceps javanica]
TQW02587.1	MRATYQYSAVGFERGLAWLYEEPRSINSCYTSVRSTIRSSPVRWRKEEACPCHYGSGYWQSGKAG	hypothetical protein IF2G_09978 [Cordyceps javanica]
TQW02593.1	MPLLATLLSQPNKAALVLKASGLAISVLEVGCLIRKRASSQQATSSGSYELCSRTTDQLTPTPTYELGTVCVREASHVSDFMIRPVSVQPLYGVTSVYLEAIGATRMRAQ	hypothetical protein IF2G_09984 [Cordyceps javanica]
TQW02603.1	MLILYWYVLRIPVAPVVSGPKPGEQEGRGAGGSRYRSGRRGPRRRGVSSLAPLLLLLLLVLRNLYSVLSPHVPAPSLLAALLVSWLGLLVRRSVSATLLDLFLLRTWNSPVLPDSRRAKRCFENQLAALGHRHVVLAQLPIAPTIGAEPVDPFDGRAFPSWREKKKERPKWWGFGLAAFTSTLGGNQPRARPIRGLHPLLFRVAERGRQAVLLAKTGATWSGYFVPGLSRLSLAVMCTSKVLLLQEHVNFGIRFKLPSTECAVSFSVFPFFLLLLFYSHAREHQRTVGVSVESSYGLPSQSCYSAAVGRAKAKLESPSGSTGMQKPLNVCLQEDNDTVPFPCTQTVRQMWPAIQPMPACPNVERMGNIRVLARALVIEIVSKYGVLGRTWTRARTNYW	hypothetical protein IF2G_09770 [Cordyceps javanica]
TQW02611.1	MNLGQAHRVPVVGIAYIRARRLDHKPAILALANLARPGLHVAVRPALLRVARAGVVPALGEAHGVPAVAPAYAVAEARDGEAPVGGAHPDAARPALPVAPDVVARVLVAAVVPARVLARHAVTAVRAAHAPPGAVRDGLPGLLAVAVHDVACGARRLAPPVAGLVAGGAGHGVGGQTQADTQRGRCKGEFHSHACVEK	hypothetical protein IF2G_09778 [Cordyceps javanica]
TQW02627.1	MYWPAECRPSLLSSKSRPKRCWHAIFAIVVLRSKAFPGIVSDEHFMRIRAAIAISNYLRLEKRSWWGHYPTLPRPKCPRQSNATPGSTLGLIICGCRDPE	hypothetical protein IF2G_09794 [Cordyceps javanica]
TQW02647.1	MPDSVCAFYAGGDVPFLFVSMERGREGGGRAGACLFGYRVPMDERLFLEAWQQVMLACRNVAGKAVKSLRWPRCFFEVRRHGVLGSL	hypothetical protein IF2G_09814 [Cordyceps javanica]
TQW02652.1	MPSQERQSGFKKIQSFKTDYAPCTVTQYVSERSGMQVIVADRQGPKVNGYFTLATEILDDSGAPHTLEHLIFLGSKSYPYKGLLDKLSSRAYSGTNAWTATDHTAYTLETAGWEGFSQILPLYLEHVLLPTLTDEGVVTEVWHIDGEGNDAGVVYSEMQSVENNGPEIMDIKARRLLYNKNIGFRYETGGMPGALRVLTADRIREFHKEMYQPRNLCVVIIGETDHNDLLQKLDDFEDSIASDIPALSTPFKRQVDNYD	peptidase M16 inactive domain-containing protein [Cordyceps javanica]
TQW02654.1	MVISIARAWVVREEDYRMSMANEPISGSEEMSSRTSVFRLACCGACLTQSPHLYGVFALG	hypothetical protein IF2G_09821 [Cordyceps javanica]
TQW02672.1	MFPTSVYFVIRGTLCGICQHTGSSAAGSDQAWRNAQLHRVEKINQSLLTLDGHSYGSRVFSGEQNGCGLQTLPAHPTACFTSLASARARRQEWLVCRLQQLLGTLSELTTTLR	hypothetical protein IF2G_09839 [Cordyceps javanica]
TQW02688.1	MAMVLARTPRPKVKRILGTITNDENRNTVDYNDTKSALIEELWDQSSLLMNGPGPETVQVLSTWE	hypothetical protein IF2G_09855 [Cordyceps javanica]
TQW02722.1	MEQEAQEMRASIRRENNQGSESDISEEWNEFRPKPHRDDEGWLRTCSVSRWAGFDDAGQTQTPSAEQGTSRYKGGTSRK	hypothetical protein IF2G_09604 [Cordyceps javanica]
TQW02723.1	MLLVLFPCPCPFACCLVLRHGEQVGGVAQCAAQLSPSAYGEDFLCRLANLIRRLGTHLHTSGAHGHSTAHVMKATAHEPRISGSTPTGLPGDSLVVTLICGWARCARWCECVVLLRTSRLPKTCPQRVIPRIGTCS	hypothetical protein IF2G_09605 [Cordyceps javanica]
TQW02734.1	MNNFTSFDGVTGHVMMRRRAFAGARFAAWFIIMIGLFFFFVGLLFVLRRFSPQNGENARPDSHELQSRTGADALEAGTMPARPTSAPAAHQRAGVLEPGMPPDRPLSAPPARRNVRIATAGDMAGRPAPTGLAPQDGLHRRSPSPFANI	hypothetical protein IF2G_09616 [Cordyceps javanica]
TQW02737.1	MRSTARSVMLLPRPAAVSGTVTNGLPDVHHIALSQMAPAQVSENKDHCQTSPWYVFFCGKESVARITRRYEALRGTSNRSRREHEPCLANKLTFSFLCLFQPCNFWVLDWHITNQLQLPFQSFSNLVAATRITACGVFELPVTDRVVTNTVASTTAATSLDKNSAAAAARPPPCMTLEFVASRDSLPALTIQTRKQFLGEKRQTWTSTDELVCVFRRCRQAWDLLCTKLTRSKLSASRLVSQDKTASSAPAAGGAGSGGPGWQDVSISKDFSASLVAHCFN	hypothetical protein IF2G_09619 [Cordyceps javanica]
TQW02751.1	MSPPKQEPRFEQAGPFFRVACPPRASSGLHYRHAPARELSSGTTTLRLQKDWAVW	hypothetical protein IF2G_09633 [Cordyceps javanica]
TQW02759.1	MGGRIRTRRATASLVCYIRPWLMLASPCCKWSLLLTQLRIHVYCIRSTVYRLVKRSQSARAGNGDKALPGTSTSKRSPAIARRPSLGPCLRAKDQTARCSSDRYQVRRRDARLVDKILSASPNGAVYTETLAGRLASWLASRRLPDFWSWARVILVLGCPLIRLVEDGQIQG	hypothetical protein IF2G_09641 [Cordyceps javanica]
TQW02763.1	MLIWVDSTAATILLAGLRWSVGRCPVRRRHPLANMFGPHLISASNQHTADWDEQWFPQVGCQPRRLPRRYGETSIRFSVQCCIDSEGHSCLMFDVCVWVTVRQQPCDRQCIVSEVSDTQIDDDDVIDWTGLDWTGLLILAEKYCSQGAVTAWTM	hypothetical protein IF2G_09645 [Cordyceps javanica]
TQW02775.1	MRMLNPSKIGFGSLHSQTLLYYAVHQFPIVERIPSPPMNLDDIPNFLTPKLDPSRVFGQIDEHLAHEVCRVVYRARLDDAASALNVRAGISARFQESVHNGVKNRWPVPQRKRSVAHARRELLSHGMPLLVAE	hypothetical protein IF2G_09657 [Cordyceps javanica]
TQW02783.1	MSARTLQEIVTDLASFTNLRATLRNEPPPFLLWFQLVPIGEECCPRRFKMRALPPESEVMARRHLYEPVPVDDVEIDSIPLAHLLKSSYHQDTFWKETFLQKLSAELCRPAGTKDSVIGWGVRINESLNWSIVLLGIIWVLTILHAAPIWVSLLPHRYVQDNGVEEQRHGRQANHGTVLQTRRRVANQPRPPVHLDVAPHHVDGRAGARGRVVDGVAAGGIIAIAPPPRRLTVGVARARACARSVQHGAVPVRQHGDGRAPAQHGGAVERDHGPDRVRRAAEEARDDDVELRGRDGGADADRDAEGRVAAHRRRRHGRVDDGGQQRRRQQDPPHHAAASGFPVAEAPARLPLAPAPVACIVAVWGPRRAAPAPAPVVLVGPLLWRLSRCVCGVLLFCSD…	hypothetical protein IF2G_09665 [Cordyceps javanica]
TQW02799.1	MRFPCMAVVAKTCFWPNEIRVDRYRELEGKVVCDAPTSEMAGARDLSSGCIEKLNAESIRLCNSQTNHTRVLYTDRTVKWLAGSSCALVGARRPKPCPIYKRRQAF	hypothetical protein IF2G_09681 [Cordyceps javanica]
TQW02800.1	MFSAPADSADSRREKASALLVKHALVSRVNSDDVGDALTTTVLPASLTLHHKAPTLELARPIPTSREICRCMSFVHGDRCSPPVVHWRSLSNGLSSDFTAVIAHRSPHFKIPATNLQQQRIRECRQ	hypothetical protein IF2G_09682 [Cordyceps javanica]
TQW02803.1	MPDFAETYKWAFVTCKWPQHFEAQADNDAILPGGILSQGDVPSSGIHRGSLREHAWPYSLRSLIPGSRSIASVARGKTLRTIVAKEAAVAASCHFAKIIDELQALRLISIILKTCVGLGLQVHEGDATINISLFSRSNRKAWRNDNYTRGSSCDSLLLLGSQPRLPRFAYATVSGH	hypothetical protein IF2G_09685 [Cordyceps javanica]
TQW02808.1	MVQVPAAPGAPPQLPHGHPGFGGYGMRFCRQATSRSPAPPSQPLLSCSSCRRRVTGSHLMHFISLDSSTDSSSLQHIQYCAKSDHNTKAPVLTLRTGKKEYKKRKHPYTQHTAPIPVSGSVRLAQTRHLLENCSTPQLTRYGVLRS	hypothetical protein IF2G_09690 [Cordyceps javanica]
TQW02809.1	MAGRRWGGWMDGGGWPLSLAVVAGRCRWLPYQTMTATTCLWAWLAGREKEEGCWKQLAKYGVKWRLICLFNYLIIFFCVFSLLIFPLSILALQ	hypothetical protein IF2G_09691 [Cordyceps javanica]
TQW02814.1	MHHTHVPGPNTRASFLGPSWLLSKNDYAEHAARAAAKTFSQSHQSLSLPIGEPGSLPFWSHEKRKSSVLSHLVGPGCLHLDRGFEVDPRLA	hypothetical protein IF2G_09696 [Cordyceps javanica]
TQW02820.1	MEVHTSHLVHGTQTQTQCQESLCPEATGTRAKQTEEEDRGVKRGQGLLKPTLLYISVTRCIDSMGGRGRKGDGPWSDG	hypothetical protein IF2G_09702 [Cordyceps javanica]
TQW02822.1	MLGLMNPCKAPRGERGETGAKIRLLAGWGTWASVGWWLVGVMQDAEKRGTSGGGKEGKEEAGWIVACTSRRLQSTDQPTRPLQCPVTTHPEGALPLLILSAVHGIMKKPTFFFHQFLNFSTNLYGYMRKPLPFPDRRALFRQGIYTLVILTVQLTAEAADTHGRTASVPAQYRVKSSQVKSSQAIM	hypothetical protein IF2G_09704 [Cordyceps javanica]
TQW02842.1	MAVFCASLLWDRGRFPPTLLCCVTHQHRARSRQKGGKKEKKKKERKKFVLPLYRPSTIRITSRLQGCHMFRSVDGLEQCSCIVPPPDPSCTSTIASYPAALVL	hypothetical protein IF2G_09724 [Cordyceps javanica]
TQW02849.1	MYTGWSCLYPGCGSLHLFGCRLSLGDGLAAKEILAAEFLSTSLSKERFWLGPVKQTTVSTIDKLGGFLKAISVLLLLLRQGTCCLLADVLVAEGVNLGRARAHDVVRGRDVLLGTSDDVRFLGHFALKDLAVVVHALDILGLLGVAGGLLRLLHGGVDVLFAENVGRHGE	hypothetical protein IF2G_09731 [Cordyceps javanica]
TQW02854.1	MKKQKKYAEAGNAAQLAYTLWLRYPKYSNTDIVAAEWALKASCGKTVVLCAV	hypothetical protein IF2G_09736 [Cordyceps javanica]
TQW02862.1	MQLYEVTLACPETVLTRVATLILCRSKRLLPNEHLLFSVAAWSGECPSGSIMSALSGRHEFRIFRGAEGAEARGDGRLAGWAFVPKEAQYLSHMPVCRMGAVRDMVESAVSPRSWHRRRSCVKRQHVFRSQEFGVKGVKVSIRSAGSLSEKILALKDGCQSVPGSCSHERFADDASTYEMGGLIKVSGGGKLGGKFGGNLVPTRPMPQGFVGLLDVLNAERRWERARSRPLETVGDRWRPLKTAQRRRIVRYSKIVLPKDPAPDLMPSLVTRQPSARRPASESCPCRLFLPDKRRLTRSTQTTLAIILASTHPYHHSCIIFHRRQNAPTCTLLASRSLLPTLSRTLAAHHATPPSQPNQPLPQSPPLPPPPPPPPPTSLPTSSTALVILSVA	hypothetical protein IF2G_09744 [Cordyceps javanica]
TQW02875.1	MVPVMGLALHISRPGAWGLRRRWGRSRSRTRRQNLYCTENVIRETRGKVIVGRYYPAIAPN	hypothetical protein IF2G_09757 [Cordyceps javanica]
TQW02877.1	MGRELQKKKRRSGRMPVQQHCRRELGQKGNTFPKLPPSRARVPPARADGRRRGPPGQVLHRGAAGCPFRRRRRLFLVLAILGPGRARRLGQDHPRDPSPGRPRQPPQRPPPPPRRRRRRGRWGPWRPAGRDGARGRRLPKDEEAPGGARGVGRHRRRRRGGHDGRGARARPAGAQPGAPQGEAPERARGRVAGPPGGAARRRHPRHGPRREPQPDAADGGRHCAQAEEAECVRKGRRAVAGRCRCCCSPSPSAEGKNENLHALDI	hypothetical protein IF2G_09759 [Cordyceps javanica]
TQW02901.1	MSLDPRLLPPTVPTKKTRPAPASYLPTTVAIPAQSSRVLPVIDRGPATGRLPSISSWTQLLRARGTGWSRGLGGSSCNGRVGLPPSTFRVCRLTFCYSFF	hypothetical protein IF2G_09418 [Cordyceps javanica]
TQW02919.1	MALASLRQQTRQLVQWIETLPVRIWCLPIFQPTEGRAVRSMSYKACFAIRDNATCLWLMQRSTVLRAVRVL	hypothetical protein IF2G_09436 [Cordyceps javanica]
TQW02921.1	MSFLTLIHATRPLLWSLSDYTNNSMSPQLAALPCCFPRFIASPSLCPAWVGAVLEAVPIRQCLGQCTWFESW	hypothetical protein IF2G_09438 [Cordyceps javanica]
TQW02937.1	MRLRQPSSCPTQRPHVLPVLTQKTNYQVGIRWPPGAARRIAARRFGSHEHVLDLGLGFRSLSLLTRLRASSCVLCCRDTLQRGQLCREISEYSIVPEMCSTSHPKNERGNSGTVPLGPTE	hypothetical protein IF2G_09454 [Cordyceps javanica]
TQW02952.1	MVVDPKSDDGASSFRIRGEEKTLLFQNRLLHVRERASSRPRRQKPKGRPLSGLRRPGLWQIQQRTEMLSF	hypothetical protein IF2G_09469 [Cordyceps javanica]
TQW02958.1	MSSNRDNSRVAPGTVGLKSISRSLIRLHIGGTSETKVMKTMESVSLKYRYT	hypothetical protein IF2G_09475 [Cordyceps javanica]
TQW02968.1	MNGRNMSLARCKRKHVLFIEPNSFVKDARFHACFIIGFMRASLLGLCCGSCASAFITTTAPSHSRYIEK	hypothetical protein IF2G_09485 [Cordyceps javanica]
TQW02973.1	MPGTPCRTTISAMQLTRYCSRARSSLSPSDRGEAAACRDDRANSRTSDLGKKPAEPSMAPPQPTLITGSSCWPSPVKTRNLSASPRAGLRAICVSCETSPCESLQPTMLGCCASVANVAGVTLTMLDTPP	hypothetical protein IF2G_09490 [Cordyceps javanica]
TQW02986.1	MFSFNMGRAARFQKKTSSRTSIIPGMNARQKLWISWAAEKQTMQLAELRKKERERTKKKKNRKKGPAYACVTTLTKARTMGTITSAGGGAGGPCSSLGLDPARHEDKLARPSTSFGRGDTCLHVASWDLYCTAKYNLVLHHTPSGPKPVR	hypothetical protein IF2G_09503 [Cordyceps javanica]
TQW02992.1	MSGRARSCVGSSSTFLFFCQAQNHLSIRSAYPCLVACSMVLRHPGHIDGLMGKVENRMMRLHGWEAVERGNTVAVVGPNNNPLTDFFDSHLCRWCLDAWRSTRFRTVKCLIFLLLPLLVCGISGSLSRARVLGHGSCDDEAARGDGSSCHFGMIQVM	hypothetical protein IF2G_09509 [Cordyceps javanica]
TQW02993.1	MGVGRRARCYAVGGRPAGPGNSFSVRGRASFCLGIVLVMEEDRQRRGRGQSNPGGRPASELCHSQHGTGHLKVLGWAKAILFGKRLAWSDFGEMYGVKKNPPKKAMSKYLLCSDTARLLTGNVLFFRGGGIMADPEAWAVESPGSPGRGREGRRVALVGHQGDDG	hypothetical protein IF2G_09510 [Cordyceps javanica]
TQW03001.1	MRMREQNLLPSTRNSERPPRRVVEATLYRSPLRYHLRFRPLTVAAAMTPPRTLV	hypothetical protein IF2G_09518 [Cordyceps javanica]
TQW03002.1	MACRARTCANEAAGPLGRWNAEYADKMSHPVSTTSRPPPSPSPLSVRLSSQAVRKTEKEDRVQTAWLLHRSEGGGPGGWMQAASFGIGRQRGLQRIVTWTDRCSRTARQ	hypothetical protein IF2G_09519 [Cordyceps javanica]
TQW03003.1	MGRIERFRGDSTGSWTERMQINVSITGSFSDFMPLVNETDTIASSRVVGSLLFPCIRTER	hypothetical protein IF2G_09520 [Cordyceps javanica]
TQW03004.1	MVHFSTALDLFWKSCSEYACPVTTVSPGAHHLCHLIVRHQRNAEATGSSGAATSAHESEKREEEKEYMSNQLCFLQQFITQHGVCVAFSDP	hypothetical protein IF2G_09521 [Cordyceps javanica]
TQW03018.1	MSCNLHSRHRFQIKASLVALSTKARNQLPVLHRGCPQVSGQLGDVSINSVYEKQPEPQHNTSMPCHARFWHGEIACHMFAIMALSNSNIPRA	hypothetical protein IF2G_09535 [Cordyceps javanica]
TQW03020.1	MPTNLASFFMLACVESILLVQDYPHPLSRLQPTSSFVAGIKATYPPLKVEVRLVQIPITVAPEQVINIRFLASSLRRSIIMKICRLGSAVAKREPKKKKTRMNGRRLEAASEPKGAKETYDRCPDACDLDFGAARAH	hypothetical protein IF2G_09537 [Cordyceps javanica]
TQW03027.1	MLETLTCFHTNRTASPEDVSSRPRIRVCFHVSEIATNRSRHPTWRAVQRCLSSQLTCEMLGRRIRAWRAGHGCYYALLQRPRYGDAVITRRHLARRWRSNVFDQHESPVSRVYIS	hypothetical protein IF2G_09544 [Cordyceps javanica]
TQW03036.1	MRRLRPTVAFTQDLSRKLIDCKSIHTTRALLIRIAGYNSALHMLSVANHSTSLLVDGVQRELLMWRTRRSRHKEKTGTR	hypothetical protein IF2G_09553 [Cordyceps javanica]
TQW03038.1	MPQQLPTTTVTICLLIGYRALPSRAARQPDTPAGLCAAHLTCRNLSMIRAIFPRSACFLAQDKPPRHSSPLTTAPRKLSTVPHRCHRQTRARPHCHAVRHGSFPTKRTDAINEEKSNKFQRARPCSGSLDTAITLKSLVPVSTCHPLS	hypothetical protein IF2G_09555 [Cordyceps javanica]
TQW03049.1	MHVGLNSAVGQPCVRPSPDEPSHRKSPNSSGTTLSCPRCTSIFFNLSMSAVISTPTYTSNPIESIAQLNGQQILSLGQQGLNDHASSPPPPKTGTGVGGREGPWQSVVLSTQYLDKPSIPTCHYSLVGEYTNAGK	hypothetical protein IF2G_09566 [Cordyceps javanica]
TQW03053.1	MAHVVFFHPSRLYPPAPAFQSPALFVCLLPNSASTPSFVPPPAARHPPPHLLSLFAASIYLGSASWLSCTINLLQNIICRPVRESFITRLLSLSHSATTRLSPRDVPGMTLVCLAA	hypothetical protein IF2G_09570 [Cordyceps javanica]
TQW03054.1	MTIWVGIARWEERGQTSFLRAAQREMGHWGMDMAVYYAPLHYSTSQLYSLLRSFHHHQTGITYGSSAGRDEDVFIGGQFLSIRPSAKCQLTIVACIFREIAYRARQLERPTKRKEKKDY	hypothetical protein IF2G_09571 [Cordyceps javanica]
TQW03066.1	MVSTNETHIGRHFESVSTVYRMSRALSTQQHAEHFLDIHSLYSHLHPACIQQYVN	hypothetical protein IF2G_09583 [Cordyceps javanica]
TQW03069.1	MMERYQICAAQFKKKSLIHSLAAHNGEWRGGRWSHVGHPAHQRRRDGQSPVRLGLIMALYASYHLHLQ	hypothetical protein IF2G_09586 [Cordyceps javanica]
TQW03095.1	MRRPVYKWSWSRVLAGGGYETQPLSPTVSHDALSLHLLGCDESRCSQICHADMELDSINIWRIGRWRLG	hypothetical protein IF2G_09228 [Cordyceps javanica]
TQW03101.1	MISQNLVIDSLLLGNGATLEHVPDKGREAKTEKKKKKISIVSVSCCQAGPGCGHGSAGLHRAVYVKQAFRPRLARLTQEHASCKRTELVRLARTPGRVLELGNLAAVAAASDMATWVGGFGDP	hypothetical protein IF2G_09234 [Cordyceps javanica]
TQW03107.1	MRQVVAQNKVPFCAMCLCVAMPLIDTNSVLVVGIASPPFHSIAWLSLAMSDNKCGETHQIHRTQ	hypothetical protein IF2G_09240 [Cordyceps javanica]
TQW03125.1	MRVEVSKAQKGEGVAVWLMAKNGLHWGRTNHLPKAENRGCHVCTASGRHQCFMKELIKLCEVRHGTTRRQHRYVGGRQ	hypothetical protein IF2G_09258 [Cordyceps javanica]
TQW03126.1	MNLISDGSDGSVGSFFSKDSSANLGGPGETAWMLGPDTQPRAAQPSTWSGGSRI	hypothetical protein IF2G_09259 [Cordyceps javanica]
TQW03141.1	MTEDAQPHGRRHCRRSRTGIDLNERRATGVRAGELRLGYAGTGFARREWARRGKQHRKAEEKECPNCNSTWMQ	hypothetical protein IF2G_09274 [Cordyceps javanica]
TQW03143.1	MRIPSGSRYDITTPAINASLLILCTAYMHPLISVRRRAWLRGKQSIRFLGKVFRTSLPVLGCTRMSTRTGQPFFRPSISWAVRPLGVGLIRTS	hypothetical protein IF2G_09276 [Cordyceps javanica]
TQW03144.1	MGVAIHRDSWVLMVSLSLCRWAYILVVLIHPWSGFASGGARHGPRFTLPRCSLLSVSSCVCVFRYRLARSPRSPRAVYSVLTKLLSTSTTAASLGRA	hypothetical protein IF2G_09277 [Cordyceps javanica]
TQW03165.1	MRLRREEGGGGWVEVVGGHEWSDVVVFSQRGGSKRKLGEQRPIGQNVGCGNKMLINSVWVANGFDF	hypothetical protein IF2G_09298 [Cordyceps javanica]
TQW03176.1	MPSSLTVKPLSHWRCCPLRALATKCAFFFNPNDLNCRVGLRAQASAKQLHSPTFNLCPTSDRHHANAQFLPISCMTYHSQERNRISHSIDLYAMFRNASLPLRLTPSFPLSSVVASPSSRRPFSPRYIIKASFAQEDRLG	hypothetical protein IF2G_09309 [Cordyceps javanica]
TQW03193.1	MTTCKMSIGTSFVMSPCLTTHQANEPMEGGGVAGRHPRPSPHLPKSLGGQNGPPDVMSGQTRQRCNRPVTKCKKSHLEAPDSE	hypothetical protein IF2G_09326 [Cordyceps javanica]
TQW03201.1	MANGWILYESKERGTLPLTRAATVQSLAYQQPPLRRREAGKSAASAVFNEITAVHMPDFLSEFPDSRRLPVYKCIAADLGYRKGKAMMKSLIFVVKVIFVLTLYGRDYWNVVLHSTVRGTSGVNNSNIPIGGCGVIAWPWKPSLAGLSIPEDVFGSSKA	hypothetical protein IF2G_09334 [Cordyceps javanica]
TQW03202.1	MVIDTASAENADWQPTCQKSPFVLLVTCRAPSPATTDPWQCSSYHGKINSPKVDNIEGASRPTTLAEEWPRQGGAAGTRLAT	hypothetical protein IF2G_09335 [Cordyceps javanica]
TQW03204.1	MVRNGYTADSSFVAWCYWSVVVSNKSQRRASLSCLVSTLASESCWVRVGSAWLGMHIGVASRPNLVVRGLLYISCRMILDPGVRELALTTDCRNFVPKHTWGLSRNGERYL	hypothetical protein IF2G_09337 [Cordyceps javanica]
TQW03205.1	MKWRSDRRFREIDWSPPVCERGIYSEPRNLIRQPLKRMDDQILGRSCSEVMELPLCVSCCELGTSLLITTIASIMSTKTTSNLASQTGLSRKTGMSECQCTNPSSSKSWRFVPTFYLRGTPPTGNTGKDSHLALDRWHVIFIPVRSMVHSCTAVPTGYEMVELKSVRTGIAVACLGRYPGPQRGGFLSRFKGKCLAINPRIANHTPFTQPYFATRGGSFRSAKTRFPSGSGVLLGAMAEV	hypothetical protein IF2G_09338 [Cordyceps javanica]
TQW03207.1	MYTSDAVVRAQVAAPTCESTFVLDVAAYDAGLAGARITAVRRCRHPSAAGTLSTWNHYVTECKQLFIWGGNTRKCPARLVKEGKPVPALLNHGNHRCMLDALCFAWFDPT	hypothetical protein IF2G_09340 [Cordyceps javanica]
TQW03225.1	MAAREYKGSIQHLYFDSKSSLTPHALLMTKDAPCMCARNVMHETKIIGRPHSGNQPEWKERRNTDGFTQHRFQYINNYVHVAML	hypothetical protein IF2G_09358 [Cordyceps javanica]
TQW03235.1	MTTWRTSHTWLNVICVFCSITTRLHSGGETWSFCSTKSYVGQPFFFWNACAYLVCCVRQTTALISKSTYRVSRLK	hypothetical protein IF2G_09368 [Cordyceps javanica]
TQW03263.1	MELLEEAGLQPAALYRLTDGLPSSENNERRAWEDCAGSNGQDRLITNKGTEINCLLPIHIRMQCGLSQCSTSSSMNRAPSITPLCPRSSLCQAGPANPARPRIARLANPCLRQPMSFLERPPWSPLPGLLANPLPGPTARPVLDECIGAAVASIVLSR	hypothetical protein IF2G_09396 [Cordyceps javanica]
TQW03264.1	MFLGSGRDGGTKSPVDDGATQAVLGQRGGPTKNEPLSHSKRYGWRRGAHRRNGGASCFFFRRRGDTLILSKYRTREGTREKLSARYVDDSSLAGGDARGEKSYVSSYLGRLPIRGPCQSR	hypothetical protein IF2G_09397 [Cordyceps javanica]
TQW03265.1	MPCRVQLLSRLETTRKLGQANGPSIWLLNGSTFRNRNGTRNGAPQIVMGSRILHSLGVRGGGRCLDADAFRSTWYSVVG	hypothetical protein IF2G_09398 [Cordyceps javanica]
TQW03266.1	MLIQCQVQILSSQHVNQALPFLILSPATPYTLARTFGRKKVFREGKQYGEPYSAEAVKQIGFRMFLLPYADYRQPAATPIGIRTHIVRPRAGQYRKHKGNRSADIPLADKRLYCTGDQKQGSAYASVVADASSGHPVLQSNHEVPSPEGMHTWSLIYFPGCRISFRSNRTKSRYL	hypothetical protein IF2G_09399 [Cordyceps javanica]
TQW03270.1	MIDVGTRSGWKWLAATSFSLRCDSINWLYHVHLLPDPSLRSSFNGLLLIFQSSRIRRTVKDPNAVVPPECRADKTCKVTATTPATHPLLA	hypothetical protein IF2G_09403 [Cordyceps javanica]
TQW03271.1	MSTVILATPESASTSKFNDFMQAMLKRGDVDRVVVDKSHVILDARRPEGREPEFRPRLFELGDYPSMWGLQTILILSNGHTITRNQSKLLNRLGLKHHQPTVFRIRTTQHNIRYAVHPVRPTGSNSGREPSTPIYMPNLTRVLPCVCFLLGTFLTPSKKFVPSFPAFSCHPAEPLTGKVRLLGIKLVTVETVHNMSFHSTITHILNADQLWIIVAKKTLQNSPFPKRGAFSYEYLAYSISLNMNYIVTFIKIINAGYALVLSLRSYR	nitrile hydratase, alpha chain domain-containing protein [Cordyceps javanica]
TQW03283.1	MGFGKKKTWGLSVHFWDLQAKPFCPSYGVTPTKMQDPQLESFPCSPFFDCFDMIQTIRNPHACRN	hypothetical protein IF2G_09012 [Cordyceps javanica]
TQW03284.1	MGQRRGGARLAAQPATRAPPRRSQLFFLLTSLLLFSEFNLFLCSVCCHLPFVGRSNVNRPSPCHVWTRAKSK	hypothetical protein IF2G_09013 [Cordyceps javanica]
TQW03297.1	MSKYTHQPACIEKIVTRRTTSNTDCTGHCSYFIMFPCLKMQEADHFVTCSSPRILGTVRVSHFARLLYLHAYYWYYWDQHLHDLPHVARPSSANMPAPGTLARILIH	hypothetical protein IF2G_09026 [Cordyceps javanica]
TQW03304.1	MTAALRPRQSHTEPFGERITGPLFLTGLCRRSGYGYAIGSVRGHRGVDELR	hypothetical protein IF2G_09033 [Cordyceps javanica]
TQW03330.1	MCGIVVPIVIVSTNRPTYDRIDGGRGRECGKRWATTSVQPSPQGAEMRIARVLVGSQPLLS	hypothetical protein IF2G_09059 [Cordyceps javanica]
TQW03339.1	MGWCFSPSVRLLFPLFFWGAAALCNVSFSLVVQQVGNQTIQVRHEFIDVA	hypothetical protein IF2G_09068 [Cordyceps javanica]
TQW03353.1	MRHEAWQTCNETCLVSTSSRVMILVKGLRVRKSMASSPSFLSLMKSFDPKRRGSIWTQRPGISLSKRSAFSSSIQHGVLIHTHTVRTFNSGHCARQETLEDKFRVQKSKSRAADSPLPLPLSPARGAKVVCCGKTRSSSASSLPSTSSSSSSS	hypothetical protein IF2G_09082 [Cordyceps javanica]
TQW03357.1	MVAAGAVQRRAGMAGKQASRDPPKDTAGPLNLITLLYQSVLRTPEYIAPCLHMASLTEKRLQDVNHSRRDRRQRKRSAGPSCYRIQPTDSLRLKALSVMITDTSPTRLRPSTYPSTLPPLPPPPLPSPSSLPTYIAGRATRSQRPLRRDVIPQASVTRPSTMSSHGYPLICFCCRLPIRYLVDPNHPEAPTRPVLLGCLGSRSQVAMSHR	hypothetical protein IF2G_09086 [Cordyceps javanica]
TQW03365.1	MRNDFSSQTTARLSSSPCARQGNKKPPSHSLGSCGIKRSRYLNSSRSGRWPGKSLSGGEEESRTNRLVENQLSMRMRFTGNSKRWTGNMKTTSASGWTWTNLRDHCGHPEGGKEGIRRAFQ	hypothetical protein IF2G_09094 [Cordyceps javanica]
TQW03428.1	MRAKRLARRDACFTSPTRRIGFACVTAAHSRTSYGPEGPSAGFPCGTGRLTNSDVVGFALYILDRWMSSAAHSRAEKSPRRRRAPLPTDGAGICF	hypothetical protein IF2G_09157 [Cordyceps javanica]
TQW03433.1	MSLAMRLYELPPMPDSELYASIECVESATTAQSSMEEFNHFTYDWIVAPEAITIGGQNEDVFHGLQPKSRTLSSERSLQRTTEVEMAKSSDLASQSPTTSSSNHDISHTVVQTAEGVSGSESDGWARVCTLSHASRPCRRF	hypothetical protein IF2G_09162 [Cordyceps javanica]
TQW03486.1	MKSAGESRTAVGARGRGAVSKCTRLRPESASASQIKAVVKQNGAPDLRFPHDSYRQLSSWRRIFFISIHKQSSYWEVCLASPTAAQCSLLIFDIQFLAVSIRPDMTSYGDSRRAGTKTRWRNKRRKT	hypothetical protein IF2G_08784 [Cordyceps javanica]
TQW03509.1	MRFESLQQKGKTRWISNLIFAMGLDQRRDQLFRDVATKLSAESRGSTQDVSVLLLLLSYLLTSLEIIF	hypothetical protein IF2G_08807 [Cordyceps javanica]
TQW03534.1	MKRAVSNSAAQGFFKDQSDWAVERAREVIGGEMQWQRWCPWGMRLGWLFTYYKCQENEGAGVCGWPCRVRWTRAMPYGLRVGALSCQVVSVMHPRCQCIAHGTLFSIMPRIGLDHGFEATIGTGSCHRWRLRLS	hypothetical protein IF2G_08832 [Cordyceps javanica]
TQW03543.1	MLGNLVFPTASAGPLLSTLPSNAAVETTKVVVVIDVIRKQRGGRLPTCSSCGKRELLTTYQDASTINGHFSAHGDTRRKRQLWWPCPAKAHNTDTYSRCYATLLHVPARRAP	hypothetical protein IF2G_08841 [Cordyceps javanica]
TQW03546.1	MMGRAGRKMELMHPGIAKRTKSKTCRNRLGDDGGDDYGCAFFRFRRESTSPPFARLWPLPRSVSMMMARINETAGSGPAALDGWCPSCDTAWAPCG	hypothetical protein IF2G_08844 [Cordyceps javanica]
TQW03557.1	MRAGYLVLIARPPEGLQSQGEGGEEDRSPLVVAVVGLTSDLHGRKGGNLHAIMPWRKESKGNYHVSKVVKDVGRPGGRASDLQVAASARSNRSSPVGSDRLMWCSEKWEWVTD	hypothetical protein IF2G_08855 [Cordyceps javanica]
TQW03558.1	MLRRAARVLPQPISIQTAVVAREVRIWQSFVILFGKFITRPANTLSPVTYETTRLYY	hypothetical protein IF2G_08856 [Cordyceps javanica]
TQW03560.1	MTAHPPTQEAPEHDSAKTVCKRHVRKQTRFYEDKDVTVNPFPDRSRLSCCWCQGYIC	hypothetical protein IF2G_08858 [Cordyceps javanica]
TQW03575.1	MTFFLSLYLSALGLEVLFAVYRLFEFEAVQGCHSSHQESCLSVTRHLRAKFTRCISITISDRYACNFPAAQRDSRCVYLYILLFSLSRFIFINFLLALSMVPKEGCFFFHFSS	hypothetical protein IF2G_08873 [Cordyceps javanica]
TQW03592.1	MGGAESAGGLCLPTKNSQKTFSERVIPEILEDGGKRTKLHTKILKSRWKGLLLRWSVQAFDIGILRRLPSLSRP	hypothetical protein IF2G_08890 [Cordyceps javanica]
TQW03608.1	MKKDSGWCLDATPARQIEITRALPLYLYASLHASPRRNTKRYLHFCTAACPPTDMVPISRCNSIFYSGGRGAIRRRTSHIRLVNSSLATAATAATSATSPPQISLAPIWSRFLAKPSFLPSRHTKQVNGGLLYRLLLLFFFFHLSRVVFSNKSVRGEFIGTTYLHFCPALHLVFLISCRVLAPTKDISARSHSHAPPSPPPPPPPPPESTLLSAADRRLVSIVRTEYSIHHLPFDSLLTLPAFFPPSPSQGPHRQCCSPSASSAAEMPASQPSKNLGDLSATDFPSIRGSEQGGLGRQLVHAGIPHLQISAKSSVFF	hypothetical protein IF2G_08906 [Cordyceps javanica]
TQW03622.1	MIDNTGRQTDSAGEIATDRWMLRCAGDGVSTSVRIIMPKFHSLLEMFGQGIASIYCCQRSCMVLVLVP	hypothetical protein IF2G_08920 [Cordyceps javanica]
TQW03633.1	MQSVVPLVACSRQVPHQTTDLHFITGCQLKVTYAPTTPLVVSGAKNEATTEVPEKPHAAIRLIPWKSPPSPPPLPTGTPLVLLVSTTSSSPSIFRF	hypothetical protein IF2G_08931 [Cordyceps javanica]
TQW03646.1	MMPPIYQEYVPQAGCLASPGARRTVRLRMLHHLPLPRTSRSLSNDCVVTVRVQGNYACMSSQFRLYCSIRDLD	hypothetical protein IF2G_08944 [Cordyceps javanica]
TQW03664.1	MAVLDPLSKTPKCKTPKPIRSASTVSTNRTSTHGPRGYSNTDAPFNLAYPRLARPRLVLCGSCQLPRGVALVKCEYNVALLVV	hypothetical protein IF2G_08962 [Cordyceps javanica]
TQW03674.1	MYKKSSKINVTWKPDRINIFIPVLDSTSCLSRKRDRSWLIQHQSRLTRSFPSVAAFRDKQEFHADIVRKHHSVRTHISEFSH	hypothetical protein IF2G_08972 [Cordyceps javanica]
TQW03676.1	MYSVISEYLLLLTRSQRKSSQPTSLSPCTRPDAQPEPGLSGNGHGLDCIVVRILHRFSFCADPVPLFYFHSFYQYPPLFSYPTTFFLLNLL	hypothetical protein IF2G_08974 [Cordyceps javanica]
TQW03700.1	MFSIGDHCWRIKIFHSYCALLRGRSPHEVISVAGFCPFRRFRTWVRGLVRPKPIARDRQEAKPAGTPTRFQNSVRL	hypothetical protein IF2G_08998 [Cordyceps javanica]
TQW03710.1	MSACTCSDACRVSNKTLAGKAQSGRILVEEGPTRLNPAARFLLGFSPAKPASVSTNGICIHRCASLS	hypothetical protein IF2G_08539 [Cordyceps javanica]
TQW03714.1	MFVSFDASEAAPALATRSEDTSLRRQFNVKLHSSRCLRDEGRLGWPPHHHHLIVVWWRSFPCQREPASIAVRDQLVQSVEKVTDQSVRQSYPCS	hypothetical protein IF2G_08543 [Cordyceps javanica]
TQW03719.1	MGLRTLTATPSSRLPFDSGTFQNRLTDPKTRCLLRDTSSYFIMRGQRPSGMTPDSPGPGLRLHAGIANRSLQGPRCSAGRVAILEPLCRIAKLARVLVPSLVLTVTGILSVCLVSVAPVAAPGAEYATTPVSRQIWSATIVAMQGLIAQAASARAGFRSAAPTALADDEMPVASTRMHTWSVCKFGVRFCVCTS	hypothetical protein IF2G_08548 [Cordyceps javanica]
TQW03722.1	MDGTGSSNKSVLCRPGTRARKDVSPRELYNDVACSCALELRHSTPHDCRIQKHNDEFLYTSCRAKTHASFPFLAQSRDAGYDSVINRIGTRHWQATRQLVGPSAVRTATLHTILHHSCKVVQHGSMVTWVR	hypothetical protein IF2G_08551 [Cordyceps javanica]
TQW03749.1	MQNEELDDLPWLARWGPRPFKRDRSNLARTIPCPIECLMQKYILCHNRIPLQGVLSQGSSQSLLEVDALAI	hypothetical protein IF2G_08578 [Cordyceps javanica]
TQW03762.1	MPPVAQAHCNMIWRKASINSVNLSQLRDSARCGDWRMRFSPGDASGSRLADLPARTSLSSSLSCLCGGLCTTSYEASKNAKYAFALPPCTS	hypothetical protein IF2G_08591 [Cordyceps javanica]
TQW03763.1	MPTRRSRHTSFLLPSIPEAAPAAKAESGRTLPDAMPVDEDARSEMLAAKVLGEVEAHPGPSLTELLV	hypothetical protein IF2G_08592 [Cordyceps javanica]
TQW03768.1	MGSSAAKLILFLSPPLPSPRSPSPKLPHSSFQTEFNSQPSRPNPCNRYSTLCFAAANFLCCTLLEPPESLLLRSSSAAGLGHHLGTLVASLRATRRSVCGACLVVNKPSWVATAPHKAPPPRLALKPKTQRRRRRDESQKKGHAYF	hypothetical protein IF2G_08597 [Cordyceps javanica]
TQW03771.1	MCSRTCLLSTSAAQNVLTGFTYLAHQFSQYNRNHPANPPSRYLPYHPPLPRYSSAEITMCQHKRSIPVSLKIAGFNSDDGSCIWRHNMELTAVSLSNEPLALEQGGNDRARKSSCGSQRRQLAILIVISTWLGWLKPPVGQIH	hypothetical protein IF2G_08600 [Cordyceps javanica]
TQW03776.1	MQPTALAHPCATPSLAEGQWHRAARVVCRCTSTGIQKSSSSKKYICRHGHTHRYQPFCKTIPTTDSKALSPLGSFSAQGCPPPRAHERGEGGVGLARSPVTKGLLLSRRNVSAQRLSVFLFPSLRMPVAFDQTSTHLEAFPGSSRIYRQFGEAKRKKLFSVPNYKEWPPPLLVSPLVGAGSWRGCFKSWL	hypothetical protein IF2G_08605 [Cordyceps javanica]
TQW03783.1	MSTYSTVRLWQGTTSHAWSRSRGTCPFLALHQCSRARPLLLAVANRRRVERS	hypothetical protein IF2G_08612 [Cordyceps javanica]
TQW03784.1	MIKIAVLTNQCTTAVVGASGQRVGWPSSALWISTRPVHQQAVNGQQTTYQYWHLDAGCDAMGSCRGHEQKRRAEHVEFEIRIADRHALEQAPGRMTWQDRSLLDQPQERPQYAASQSPSPKKEAFQGSIEGGAEKKGQVDKKIKKRARGGREGFLQISEIYPHMHTK	hypothetical protein IF2G_08613 [Cordyceps javanica]
TQW03786.1	MVTLCPSERRCRAACPPIKPVPPTTRVFILRVVRVYSCRFDCLFFPVIICKLTLYVLIVEEYMSAARDCPSRYPSPPRLLYNFTLLPLCSFFVLNSIT	hypothetical protein IF2G_08615 [Cordyceps javanica]
TQW03796.1	MGTNFVPSSLPFLLLFPSFPPAKLPISFPFSPCRIVEATGAHPTLQKVSPDPRYLHGRPGRCGSDFLLIFPISLFSLVSPFSYFCRSAPCFSHYLWNVVSIQLAWASHHEDCYACP	hypothetical protein IF2G_08625 [Cordyceps javanica]
TQW03804.1	MTRWVARWLGGFDRWGVVHHQPQNYHGRSNAQVNAQLGARWDHQFDLVDSLSDLAARTNQLHSDSFRNEHILYTDTDTDMVADKGVPERVCIGRFQGDLNSLQA	hypothetical protein IF2G_08633 [Cordyceps javanica]
TQW03805.1	MLPPPKHTETRDSARRLKDPGPGRWEMWRNHKRECDSGKPPCLPLSTYRGREGKEGYTMEYAVQGNFKFSCPPALLGQLQSCHLRIEGEKILLSPCIIVESRTTRNASMNYLPSTIPLVPRPASPFFPPSPSPSPPQIANL	hypothetical protein IF2G_08634 [Cordyceps javanica]
TQW03806.1	MAADLGETARLKKKHDSIDKKKEDFPPCLVLRALLLPEVNTYRQTRQTTARVRGAALAGSNCSRRARGRGGVSPEREYQDLWLDSWTAVPRNDQGQQTGRRADRQTGSQDQQARAKKCQQGK	hypothetical protein IF2G_08635 [Cordyceps javanica]
TQW03807.1	MVVPPSLYGWFGARAICFAGWSADGQSWCATLDYPNTLGVSLNLRLPLSASPWGEKEGLGSSPPGVNPKRGPLPFPCFLSHNASTQVLLSPTPTDWLLTHSSYICFPSAPVQSSSLSSPSCLGSPVLSPGSFMGVSPISTKTVLLLLLVKAEPVSKLR	hypothetical protein IF2G_08636 [Cordyceps javanica]
TQW03808.1	MPLPWLKSKANSMGTNTVLARTWGSSFTWYSTSNQGQWHSSVRKQTDADTCIMTADLHLATSSQSEQAGNLPHNPRCSIADFRAVMESSAT	hypothetical protein IF2G_08637 [Cordyceps javanica]
TQW03815.1	MQGCHGAGRIPDGARCRAKERCHSLLTDRLVVRSGTQPHLISSHPLQVYCGLVRAMSKFEP	hypothetical protein IF2G_08644 [Cordyceps javanica]
TQW03819.1	MSDQVPLWRQKAKSDTRIPDSDHSSYFHFCHHTGGSSQASSSLPLPTTTGHPSSITHRITHHPSSNYGYITQLRFIQLFLQPSIADLHSCISPNPPKGVAAPFCYNHHIQMSSTPVSSFQSSLPPSVPPTPSSPAKEARKGLVLCLTRPHGPDMHHTALQTLGVLDQGIWKPLSQAADDRTAPWLTLELLCFFSLCLHSTPTSPKQANSCDASFKPLALLVGAVAPATAPEYYHDDRGFRNSVDIRQAVAACCEVTKLSSVFKNSINGAPSKNTHKTIPAGRCRSVLLNRPIGCWKRLTGERCKSRHDSGRTMYDPHMDRLGQRYPCPVVEYRPPLRIYRAAQVLTRWHQLIARRNRRCAVDSSSQIISAWPTPRILGACCHVLVFNTVSVLLSWDAGG…	hypothetical protein IF2G_08648 [Cordyceps javanica]
TQW03825.1	MPISISPGLGIVKAGPSQRVIATAQEANEMTYMRAEFRGLFSCPSLARPAGATDRVLPKQRLQPLQPNLLGSPPNRRGDKTRHKG	hypothetical protein IF2G_08654 [Cordyceps javanica]
TQW03826.1	MSKIKNEGIRPERLDLCMTKPSTPAPLWEDVLGKEEMRIEAGEWRFLGGGEGGGKVLDKGRLAVFVDAVFTSTEAALYYRRRANRYTAVNPLGYQSKQSAKLPRSSLPAAFWFSLPRMRQPRTLTVCGAVDRCACILKKRTREQ	hypothetical protein IF2G_08655 [Cordyceps javanica]
TQW03841.1	MSTLRQRHPFLQLAFMKRLVDLHFGVCGSIFWCLLSVAHDPPILSLISSLLCKPKLSV	hypothetical protein IF2G_08670 [Cordyceps javanica]
TQW03852.1	MLTLASKTRRVARGHAGRQETTRRHHHPGRRTSQDYGARLGRYVWRAELQP	hypothetical protein IF2G_08681 [Cordyceps javanica]
TQW03868.1	MFFYFFLIFFLRLRRALVAWLSAVVDKSPRSCALEWVTEYFEQRPSTSVIRQKGAWNIHPCKQLFLPRATVWPSSFALFGVTWTRRNRYVMAWCPPSYPGKPGTMQVVLYTAS	hypothetical protein IF2G_08697 [Cordyceps javanica]
TQW03890.1	MAKPNVHRRFNGRTAFLGSQSVASSGLLFSQQLAVKSLVDDAHNLSANCIPFHAENRLSRAPVRIFHRGRILVGAALGLAP	hypothetical protein IF2G_08719 [Cordyceps javanica]
TQW03891.1	MDGGHSKCNRPGTVRAHRWRSPTGEKQLAQSTVHHEDEKEKGKKKHRTGYSGHLLPIKGTRQSTKLARSCRFADVELGAWADAMRRPPRPAVIQSVLAGYINQQTGPTAESRRGTRKTPHNPKLKTRRKRKECNHDNNQESQARPFKRLEHILGGKQGSLW	hypothetical protein IF2G_08720 [Cordyceps javanica]
TQW03902.1	MRILGLVLLRPSGLTVVGYQKHSVRGSRYVLGYSTEDRPAHHWQDMCQSSSQWRSPMLRFRSAAFDQETR	hypothetical protein IF2G_08731 [Cordyceps javanica]
TQW03905.1	MRHVHLRGHLIRSTHPHTHTTTTTHLSLTTPSDPFATYFEPSPFAERAPAFFFFGEAIPSRETSKDHFRDSRPRHEFGNFSILSFFLLNLTRENSLQDAIPNPKCHCIQRRIWLGPPSLPCVSTAIPTSSFTYIHEPILCNPHVMSRCLINLLLQPRHYYSVWSRQLYMSPVLGSLFRCPFFSPQRRSPSPPPPVSTRITASPAKDHHRPSACHRFKAAVSIKILPPNK	hypothetical protein IF2G_08734 [Cordyceps javanica]
TQW03907.1	MGWPHRQAVVPNTNSPGYFFFSFSFSMEGGVWSIFSSAKHEGKKREARAMGNMSRM	hypothetical protein IF2G_08736 [Cordyceps javanica]
TQW03913.1	MTPGLAVIATYSPSSCFVMPSSLVRFPLPPAPTYQFASLALPACLGHRADEHAPMYEYIPELALFSLTPCLPITLCVCLCACVRVSLFSSLAAFASGGRGLHMQQTMRQLAIVWGRLQGCFQALYQ	hypothetical protein IF2G_08742 [Cordyceps javanica]
TQW03929.1	MQVNTAGLILHNTVTNPTHTTCTKQPKPTSSADVSLVHDAPSASKPAAPPLSQTRLNIMRIRLDCPRR	hypothetical protein IF2G_08758 [Cordyceps javanica]
TQW03930.1	MDWIVPCFFFATRDAKLRLVDSLPALHGAATQHAVRGPGGDAEGARGSRRLSHLAKGPAALVGSGALVATAVSLCAAHHLLITYTRTPYTHTHLGLSEIDALMRTGIGGRQNHSEPLTVYCAPDARTGSCTGQQVPTFGWPTTQSSAAYSPLIPEPLVDWRQNRPTSRLMGCYI	hypothetical protein IF2G_08759 [Cordyceps javanica]
TQW03931.1	MIRQPKGVDASGVLGKVARSCYISQKLHDLMEMMTPYSVLELSLQKYGVQQCRPSQGREAVSAGLVTLFTSTSKVLGGKVTVRRQSPVIIIEANSVASPQCGPRVPSILSTRRQPASWIDKGSTGGGPAIPKFEHMVCILLLFTGCDCEAGLFFLLLLSSSKLLTSTVPTREFLDQTGRRGLFRKSNPAPEESSWGSCFK	hypothetical protein IF2G_08760 [Cordyceps javanica]
TQW03932.1	MLLILSILPIPSILLQVCEFVSLPPLNLAESLRCPLACLPAGLHACHLLTLALGVGCTPPPAEIGHGWPGT	hypothetical protein IF2G_08761 [Cordyceps javanica]
TQW03935.1	MTTVPPPWCVSPPLQVLGAEERGRKKVGNQLKKPCFLASFYSRASSHVAKTSILTSSAIYPLASSISRAAAAPTPQLSPLWPPRLLVGSAAFGSACVCAAKPY	hypothetical protein IF2G_08764 [Cordyceps javanica]
TQW03942.1	MRRKCGSIDPNSLPNYKDYKDKTVLFHLVIARGQAYISVHLSPVSTVPHAGIVRGRNRLRTRIPLNR	hypothetical protein IF2G_08771 [Cordyceps javanica]
TQW03969.1	MNGLLAYPVAGQDGPCVQRLRPKGPTGKPCRMVIPPSRALVLRTWAATTFLYRYARKLGR	hypothetical protein IF2G_08283 [Cordyceps javanica]
TQW03971.1	MAASSALSMAALSALSMAASSALSMAEAVGALCELIDGCVLCHFLCLYEPMSDRFLDRKCWFDQGIIRVIIRGRINIFPNVQALGIDFRCVEPLIPGLGNSELRNGRSHDQRLIE	hypothetical protein IF2G_08285 [Cordyceps javanica]
TQW03974.1	MSLKKLRVSLPFVMSQFDVSLVCIRMSSKIFMIIYAYICFGSDLPLRRHRHAPVECDEHEAKGVSQRANAQFGCTSISKI	hypothetical protein IF2G_08288 [Cordyceps javanica]
TQW03979.1	MTRANLDNILQSYPVVQTCVGKLCPSGSRSKPPRTAVARQLGCWGLVFSKDALPREKGPCLAAWHCFEEKRGDRRNFSHFADTACWWTVACRFIPPYCAGSAPCGVTQYSVHTTPRP	hypothetical protein IF2G_08293 [Cordyceps javanica]
TQW03982.1	MGFQSTSDGGVANTWGGDSASPLVPTGHARGRAATNLRYKKKKDPFAHGRGAILPGFDEQGRRGVGQAAHSQVPHCHEKAVLCERGREIDGSGTGVQWHNGLLMMMMLMMMRIGARPLLGPAVMAA	hypothetical protein IF2G_08296 [Cordyceps javanica]
TQW03999.1	MTIRVHDPMGCAGLLPSSLVVPCRPAVHTPSIHAPHVGGAVPVEGDGDTHECACMERTSCMTGTHI	hypothetical protein IF2G_08313 [Cordyceps javanica]
TQW04000.1	MQHIRQIHLGAATRTRAEKNFASICGKKKKTLLFSSTTAALLLMMLDGRDGGSTGIPA	hypothetical protein IF2G_08314 [Cordyceps javanica]
TQW04008.1	MSWGGARWTAAPARSLGRGVSHVTQMAVANYEAPGLDWSTPAGISETARG	hypothetical protein IF2G_08322 [Cordyceps javanica]
TQW04010.1	MYYNNNFKQLVYLEKVIGVVTDKAGRGVPLTQQLRAPDRGTQNGRRKKIHGNQVDGLLLSIVFSNATDHID	hypothetical protein IF2G_08324 [Cordyceps javanica]
TQW04014.1	MAAAVVLLVASCKGSLAISRVPVSWAFRYKSTDQTGLKEIEDTCGKRARDRERWRERGRDERKEMDTRIQDGGDRFVGRCSSINDGWVIHVLSFDRLNPGIPLNCGIFMGCWHCIRTSREGQAKSRVPSLHMCCVCLFVSTTWSVLWQGVLIVEGEREWPTFFFYCCGNSLVLSIGGARGRERALPENIVEIKR	hypothetical protein IF2G_08328 [Cordyceps javanica]
TQW04029.1	MNVTEEAGERKQSKVTKKNSERENLTKELKKRVERIDNLRKGKLSGNRKWIFYSKTLYSRLIGIGVYFSSFDIFPSRWLHFLCRGVR	phage minor structural protein GP20 domain-containing protein [Cordyceps javanica]
TQW04032.1	MVSCKSTCYDPWPYDLWTWNNSRRCCTHLPRNCFDWKVRTDSRSGARRLTGRTDDGPDMLNSSLAT	hypothetical protein IF2G_08346 [Cordyceps javanica]
TQW04037.1	MGILWIRACKWNAPIRMPGQGDLARDDVESIEMVPGASSSTRSVCCFSGRKQGIIDASVFPGARQFWYIDATLGKLAAALSLGERPPDVWFRRSRM	hypothetical protein IF2G_08351 [Cordyceps javanica]
TQW04043.1	MSVPREYGSEEAHIWPRAAVVCDLRLLRCSTENADDLAPTWLSRRPCYCESMEMAKNKESPSTFSRCKFCLLHAFHPTGFCKIRSTLTFFFFFFLKVVLVTIRERIQSLKVLGELRRVANSDRFSSQCDEPPYLPFIALRVVNCMICCWAVASPRAHEQHTLDWLSSIGQRPNRRHLGTWWLSEIWIPILPF	hypothetical protein IF2G_08357 [Cordyceps javanica]
TQW04047.1	MHLLRATTLSTSSIARRVSTPYACLERQRDWRVALVLLLQRSSSRFAGGRLPMMVRATGNPWPVVGVAKGTRWLGVGRLGTMQTAAIPAACEVKEPLHRRSSIFFKQAMFQMWLVD	hypothetical protein IF2G_08361 [Cordyceps javanica]
TQW04048.1	MCHVNRKRFSPLHPFFFCPRCTSCSSWLNKDSVVQQVHMTDLFSSFTNSMPRFRFSSFATPE	hypothetical protein IF2G_08362 [Cordyceps javanica]
TQW04063.1	MAQTHPTIPTLDRGRLVFSLSLANDFVCLLDIEPLSEEIRRRSPGQGYRLTLLSPLSFLLGPIYGDPGLVAINRLLANVLATTGPSNTVRRCHPPCSFPLYHSDPPPGETRLFYGPECHSLYCKLRSTDDGYNLCELPDGLGISSITCTPSHVFCGVPGLEPVSATEKKIDFGLEPWRGGGFLAEQAICRTAIYQNTSPTVWYPPFASGPVTRHHTRQNGLDTCRILIDTWSFFVPVHVFRHQISHRAQSASHSLSVLEQNSRLDEKKKYVAIAARAPAECSSFPVAQPDSGDPGTDRDRETCPSATRDLPVLSSTAMIYYDAGPSFSEVKHLPHPLSFLAWRVASGVLYLRVRDIQCLPHNPDLSAPARRTQKVRAPAQNPCVPEIERASILNVSLIM…	hypothetical protein IF2G_08377 [Cordyceps javanica]
TQW04064.1	MSDLDDSMRIQKQRIRVHAKTAVRNVIRTTSIVYARCSNTEPDGYSAWKNSGQLQDSACTEREATYQLAIDVSNTVIMSLFWFWRIKRFLLLDPGKSRLERKPRQGSATSVLTSYDRLMGNRLLPSEAMSPMLCFRICNMIEKRLTVTSAVYGMKR	hypothetical protein IF2G_08378 [Cordyceps javanica]
TQW04080.1	MFQSCSSFLLAEKSNRKFPGRLKTCLEYSVVEMLNESKGGVGGRSEAIRVHSVTAYKARQGKARQGGKWTEKTEKRLILGTSTVGPQAR	hypothetical protein IF2G_08394 [Cordyceps javanica]
TQW04087.1	MTIPTGSSAIRPPSLLESAFIPSPRYAGLPSILGRCRASLLHSIAMKCTQILARSTCKAIYIVTPLPTNLIFEGFHRGFEVGHARTSRCSVSVMVGQLVSSCTT	hypothetical protein IF2G_08401 [Cordyceps javanica]
TQW04119.1	MVRAGAGPDHAHGQTLGRCQGSISGKKRRYFPGRARRLMPISTSYPPQTNTTTTTTDTKTLKLSSLSVAPSTERPPNCWIHRQHVQQLTELILSRGHRESVAQYRQWPRHPGGPKRPGSSTPPQISSLSIDVNPVRRRIRPLLVLGDPGDASGGRTTGCDDTVRSKDTQARLALLHGVQDLRRGGDGFCSALPWSVVGHLPIFFASHCRMKIWESM	hypothetical protein IF2G_08433 [Cordyceps javanica]
TQW04132.1	MQSVADDFVESPWRRADTFICHRFFFPCGDTSEMLSLHVPVTSVLFFLHLVIVGGAIDMKRGASSTMRRSGPCPCRRVEFQLSVLASFENLLIIDSRPRLELFGSWLELEFRRAGKESGRLLRRWRVRAWSCCRSECPSLCVQADDEADDG	hypothetical protein IF2G_08446 [Cordyceps javanica]
TQW04137.1	MHGATLIQGSKQTYQVLSSNITRQASNNKRPLLTTKKSSTPSRRGFVGICIHAGLGCAIDAMLLIIHPSTLCACHAHKCDDCFNLLCSSSPPLPPPSTVITRAVALRFWSDQKLCGELKKKTIAGRGVPRF	hypothetical protein IF2G_08451 [Cordyceps javanica]
TQW04138.1	MQDETRPISKENMSSCTFQQSREPTYHCITAPCTVTALPEPRKSTWSGVGSLPIAVTSWPNSYFISFVSIYAANASPCLGRANFVQATTPPDLTTPQKHAIHNLKENVSWQFKTVPAASMRSRLYLQKLILPLLATAIKWGEIGGWPEKWACCARGQELHGSWLCGCAAPKHVGPDGYSSRKSGTLMSVSSEKSSPDIRMEECVIFLDNLNPGPIPCTIDIALRPARYDIRFVNYWTNIPWIYRQSP	hypothetical protein IF2G_08452 [Cordyceps javanica]
TQW04144.1	MEMAAAPRISPKAATQRTNKEGGGQYLLGYDVESGLTSCVLRLAKATILCISLLILGPTLMRNKVQGTRFITKGEKGDSDVC	hypothetical protein IF2G_08458 [Cordyceps javanica]
TQW04148.1	MAGSPCLPCCPRCVLDRMSIPTSRVSRRETRQPGYGQSILRSVSQTSGPRCPFSQMLSDESRRAEYVPTTVSASQLPRLELLSGTLSGGQVRPATPLAIERNIDWSAFVTRLSSLPRACEIVHVLNCLVLCRSVGLLRSAPVIASADNDEARLPKAHNANERCMFPAARSNPCSMNQGLRKTPGYDAFISINVLATTQYNASHKLGLACLVDDGHLATPIIHRKSVDMSCAALDSLPYRTFITPVSFPLASFGHFYLHHLGPSKLTVVWLAVPLTTWRALASGKRSHMTGVHRHKNPTGDNWPQIIVRQDYSTSEVATVLR	hypothetical protein IF2G_08462 [Cordyceps javanica]
TQW04160.1	MPLFRAIFSPYTALVDTLSCITCKHSRGLRRWNSISSFAGSKPLHLLQTRSDYTIRGTSTEHMSSHMRQNKVYSLHKLQPSCQAVNLVWHVGCTPVTAKALSISSLLPKRFPPRQSLVRHRQHVKGKPGTNVAAIASPAALDAEDLHNNVPLVASIAKVNPSHAQDSLGLKGKDLESILITTVALGTSFCPSWLSQLLPQPDSVATKMPGIGQQKTPCHEVTCSKTGWPQY	hypothetical protein IF2G_08474 [Cordyceps javanica]
TQW04170.1	MNLGYFEGLCAACRAGQRVLREHTAESNIKSARTGNMGDFHGKVSCRSRMWSIPFHLDPSSFGHVCVYGWGTSDIRPRVNDQVILAGRQFCLGLVYKPPVKRKKNVLVILGTWVAVRIVVGYYWIAIKCVLFICRASLGHSLLSSLSSSLSLTIASVSTSEE	hypothetical protein IF2G_08484 [Cordyceps javanica]
TQW04172.1	MTAACGLRWALAARCARFANSLSSRRAWSRFRPGACRCKKSTQIGPPFTSHKEYTRARNGSVSKLTCAKGNNGRFADFSLAADGSRNSYCSKWWWQAAALLFIPLKVKDDSTRCASPF	hypothetical protein IF2G_08486 [Cordyceps javanica]
TQW04174.1	MNNAIDGATRHSPRAALSVLSSLQTIPPHCVGTANPSPRCAQPSTWPEEILQPRARTRCCVIANRQPKKARKKERKKTSQEIHSFVCLKSKSPKTFFYVNQLFFPAISPVSVIAATLAAGRLLLERHTPSASLY	hypothetical protein IF2G_08488 [Cordyceps javanica]
TQW04175.1	MGKNHSKSASSLRIVGKRTGAAPPPAPPSSNAAPKSASPASPNSLSHDLLTKCLVTSAYGTSFPLIHLPAPPCDDRAPQVPNLGSLGLSNLGCLAAPDECASCLTLDSLALHTGSSHTT	hypothetical protein IF2G_08489 [Cordyceps javanica]
TQW04187.1	MDPWMGEVEVSWYDVHVASVGGTWGLSLVTRGSCAACLSWMPYQDKQLGGRAGSSKYLSLNTWY	hypothetical protein IF2G_08501 [Cordyceps javanica]
TQW04188.1	MSWPPPKLPSLPHNTLGPFRTLTTLQLDPVPLRRGEGVVSAHCRHGTPAYVPTTYVPVVGCVIRHISGGKRLCFLRPRQDGLVSPEGGASVMSNDRTTPPRHGRREGG	hypothetical protein IF2G_08502 [Cordyceps javanica]
TQW04195.1	MKELDDIWKLADSFIATASHITEAAAHRQGHVAWPRRAKMKKVTVFSWAQRIFGSSDCSGGSGTWAEFETAIVLLDVNVDRELTSLST	hypothetical protein IF2G_08509 [Cordyceps javanica]
TQW04202.1	MLRTRTGSWRVAGDFIDEGVKGGCSADSAHILNLTWSFTSLSWPIFILLPDSCPAQGQHNSSCPCKPPPTYTNTRRTQAQHNVRDQAIG	hypothetical protein IF2G_08516 [Cordyceps javanica]
TQW04210.1	MSGIGRYCYPRPAVTGLDAVCRQRYQRSPGSGSCPKTTATEQGCECIR	hypothetical protein IF2G_08524 [Cordyceps javanica]
TQW04212.1	MKRKVLPFVATKDQNKGNHRMPSSACYIQFSAGHSSLSRHQTLQKPMGSPGGFLLHTLHKIQLL	hypothetical protein IF2G_08526 [Cordyceps javanica]
TQW04215.1	MNAHRPRRLMVMNLGPNKPTDDGRGDGGPAQRAIRCSQVRYGGDQGVKIEIKVGPKVLVVPVFKCLSLLVFCRR	hypothetical protein IF2G_08529 [Cordyceps javanica]
TQW04217.1	MLKSHPKSWLLLLTSSTMFAHTNATTPTTDQVPRLQQPELALAAREHARLHLKVRGVRVAIPGVKVVAASTLGVDDTLPEAIVLRRVLLHAAAYRESLDATYRAKLVGFK	hypothetical protein IF2G_07987 [Cordyceps javanica]
TQW04239.1	MQKGCNLSASYQDPVPAKRVAKIKAALHCTAPQYPSLGPFAITKPDSICILRQLHTCPSLHPSIYPASNHFTTPQTTITSASPLLSFSPSRSLTHRLTRLHSLSLYGTSYMVPITSNLSSSSLSNHLSSFGPDAFSSGDLDP	hypothetical protein IF2G_08009 [Cordyceps javanica]
TQW04243.1	MDISCPLAMPTISRLGLHSVVSTSLSHVIVGVVGELALAASAASAALSSSLSALLSILMIPFLHLCIRTPCRQLSGNMG	hypothetical protein IF2G_08013 [Cordyceps javanica]
TQW04259.1	MTTSPLPPLGCPSPGACHLIRGPRSPQPRAANVLGAHRVARLVAVGVDPVGAALAVVDAHRVRAGADGKGRAAVVVDEKLLAVARAPPPDVAVPEELRPAAEHVEAEAAVRAVALVAPRARRQGGRVGVGVAGGRVAGGRPLNGRGQHLDGEHQPGRALDQCAFHRSCLVRVRLTTDGAAGLCTIARRPKEKKRLGCRERRGRCGCLRK	hypothetical protein IF2G_08029 [Cordyceps javanica]
TQW04262.1	MQDYSSASYQPHGRGPIELQLNDVVEAPPSQLGVSRIEVCTYEMPIVSVTSRHPASPFVILGYGRGRSRPPPPQLVSSMQLLNITTQRVQLLYIASYTLSREFVRGYGNPDKVTSPQLSVLAKN	hypothetical protein IF2G_08032 [Cordyceps javanica]
TQW04278.1	MGKGMQPGRQEELLVHVLRQASLDGSRASQSSVVWNAIADVLAASVQPWPQASPLLPQAERWPLTWVGRVLEPDQPTGLVPQLRRRGKTCRHVLRKKLSNFSSGAGAGGGFVRVAATLHSSRPCRHNYASQSQLIRSASRCGWKNPFLPPVIDWKPISMWAGGACDRRKLLTSEISLLLTAWRMGRMMAIAPGIPPSVP	hypothetical protein IF2G_08048 [Cordyceps javanica]
TQW04281.1	MARNWQKSREIVPSVNGVSRQISHRIPVFDHAAISVMLPARGGVVVMAFSPGRWKAGSL	hypothetical protein IF2G_08051 [Cordyceps javanica]
TQW04282.1	MGANKDTAPRQAVASSWIARLSGKEGSVYSKGDKIVEFNKSEARRGGKSQEIGVRLALTNCKHDLKSFSFPFFKSLFQPFTITRGIKICVTGFVEDEKLSCVRLQDAIARASLVAPPSLLACGFICQDASNRAGLTDCSMSIKKKSRSVNNVAWLLGCPLPWNRMESTPLGHEGGMKAAHRHNDPGERERNGIKEKNKLTIRVCGDGVPRPRVPEARRIARRFSYSLSSLSDFYQPKSTLALLRRGLVLDQRRRPKPATTHTSKQASRQAGRQARIDAGPPESRCNQVSTRLLVPFVLCAAARSHDPKAKVGCCKFQQPLQRRSLSAALLLGRQRETKRRTLDWLALALPGLKPGNPFENRKSLVDVWCSCPPLAQWTLFRAFRLLCWSLTGTLHLLFY…	hypothetical protein IF2G_08052 [Cordyceps javanica]
TQW04296.1	MTESMIHTAGRVAESFDCRVVGTLLRIWLDDVEIKFHLSSTAKKLKRWAWKAMKEEESFFICWQLGEW	hypothetical protein IF2G_08066 [Cordyceps javanica]
TQW04310.1	MLLLSQSPVSGLVSGSCFIIAIPRLLYVNKAKIGKHIRVIRKSVRVISGAEYLQLRTRPCFQTAAAGAGPFQ	hypothetical protein IF2G_08080 [Cordyceps javanica]
TQW04340.1	MEMGRRYLHLRRVRSWAGAPREHFTPVWILRSVSLFFPGCFRRKHVCAGVFVAGMAVW	hypothetical protein IF2G_08110 [Cordyceps javanica]
TQW04359.1	MTAPVAWRRVGAAASGILSLVTAFQPSQVQLPVSSTNGVVLQTCRRATRPPFHMQTHSKVYFQIMQRIYLLHSPLLQQRTHSWTHLRRDCRTPIHPCVHQRRNIQQKRKRGKCDN	hypothetical protein IF2G_08129 [Cordyceps javanica]
TQW04385.1	MVKHLELFWKRGRRNPTLDLEECFMTRGGRPPRSGPQLEVLLRFQVHGLESEKVAAPVSRCCLASWNSRNAERRPSCRQ	hypothetical protein IF2G_08155 [Cordyceps javanica]
TQW04407.1	MEAGRAFWVSPLRSKVMTMGRYSGAAPSLVRSAFSFFFYVRLIAPITQYEHSF	hypothetical protein IF2G_08177 [Cordyceps javanica]
TQW04408.1	MDNISEPDNSFQRWMKEQDARHFVSRLISPPTRSSQRLQPTVPAIHGDADSPSIRAQYNPFPSCFRKSSSVAFVNATLRPRLPSAHYCW	hypothetical protein IF2G_08178 [Cordyceps javanica]
TQW04409.1	MRSSAGFNAQFRILAGAMMKKPLAARGSYPGLKDLWDQYPAGARKFLAYYLVELNHDSPLVTDKAFPKPSRLLYERPTVRTEETP	hypothetical protein IF2G_08179 [Cordyceps javanica]
TQW04436.1	MSPLCWVVPPKHAVTWLAIGKAASPGQWGKEAKADERLWPPCPDGGVKSVAGLSHVRFSVSRALVANSPGTTPKGQKYSTHAFDSQRPILSNHVAPVYLCCCIARPHASPPARPPSSIQHHDPPSPITHGHRHGL	hypothetical protein IF2G_08206 [Cordyceps javanica]
TQW04447.1	MMNLAATLSQPNERDTNLFEYWHTMHAIAILWPGCNTLYRDRHMYEESEAAIGRQGGKEAANTVSTAGPLRTVPHATQLLNKLAK	hypothetical protein IF2G_08217 [Cordyceps javanica]
TQW04459.1	MQGKSAQRRCITCSQNARVSEKMNGFIPFSRPLCRSAHRDNGHHLTICLDTLKLTPVHAVMLVLENPLASQQDCDSLAVGGWLQTMPPKQPSCQAEARGYQQRGAHLILACLYACQLSLAWGLFSCEVFPCVVRLGTTPWYIVGPPSADGQITLSATFKTMTRSQVPGTEALKVRPCKFRHNDLHSSPSLQRLRQRDPGFYGKQGLERHGDQPPRGVRAKSSRR	hypothetical protein IF2G_08229 [Cordyceps javanica]
TQW04505.1	MTTLATGSPTSSSAPDPTHTVYVSQTPALPTGVKAGIGAGAAAFVVVLFLLAFGLYRRRRKEKMCRVPATAAERRERSEIDGEASKKQGTEADVLEISAVDGGDATKYTMPQKEIVELPTERGN	hypothetical protein IF2G_07734 [Cordyceps javanica]
TQW04518.1	MQASLAFRPIHSLLPSIFATEISPFVDKRNLVSVWLSSLSSPTFITHTKIVSASLILRLGSDNLQAEVTEPCIQTSIHYPAVFCRMSSVLLRIQFALAPGLRVVAVIYQPRTQLTFSASSQHE	hypothetical protein IF2G_07747 [Cordyceps javanica]
TQW04528.1	MASFIWMGGRSYAGRCACTHHNRSRIPIISDEYAATDNQLYQRQLYASASQWIDDWGENCYCSVCSFIDSWPGGRSVSMLS	hypothetical protein IF2G_07757 [Cordyceps javanica]
TQW04533.1	MSKLCCWWTLINGKSLQSEPGISTESSVSYNSSGLPNKREGPEDSGFFVIILRFVIYWPTFA	hypothetical protein IF2G_07762 [Cordyceps javanica]
TQW04542.1	MEMENGKWKLWHNLTAWPVLACLFPFFLFPLTVQTKSMTTVQKALFCNSVLGGNYPICVFGHVQGDRQAGAGFVKRDTMERKRVAKYERSALAEKTPADGLHVI	hypothetical protein IF2G_07771 [Cordyceps javanica]
TQW04558.1	MPNPVSMPVVAAAVPHCSLSSHDEEEANRLGVPSFGAKRICRRALEEKKRRKNRKKYNA	hypothetical protein IF2G_07787 [Cordyceps javanica]
TQW04566.1	MTLQVRLLKSSYHRCREAAHTTPPHTSTLDGSPLEQLLRVIFQDMTSEAGDCPIMAGVRSTNVAGYCNIIWGFL	hypothetical protein IF2G_07795 [Cordyceps javanica]
TQW04586.1	MRRCRCVWMGVDLVCADKCRGATWIWLVKRGCCWWCREWKTDKSVTGADMARVLATGCITASLVHAYRDACTSRLGNAKVVVVVVMNLLRGVALMNLHPVVSPLY	hypothetical protein IF2G_07815 [Cordyceps javanica]
TQW04587.1	MRKRKTAFLQNNEFARVKIGQERKKEKKADEEEEEKEEEEEEEEEEEEEEGDWINVVYIAPSRIGNGSRFGHKRR	bone sialoprotein II (BSP-II) domain-containing protein [Cordyceps javanica]
TQW04590.1	MEGCVGRAWFGIPPLSANLPPQAIYQHNPDQDSCNSTIICHVRVRPSTPIPLPTASTFHPGTVARSKGRVLGAGLQDS	hypothetical protein IF2G_07819 [Cordyceps javanica]
TQW04591.1	MVPWAWTSSRTDVSRSWLDPVLSVSCWCPSMAWMLQPECSVVRRGTCQTLYGTGECSNG	hypothetical protein IF2G_07820 [Cordyceps javanica]
TQW04593.1	MDVGSRRGTGRSRKINRVGLFVGSGEGKDGRGKEEESGEGSPDSKGGGCARINRPNLDLGSFFAIRRMYRCRLEISCRGSLYMGLPVGRSGHLRRHPSPTPEAGGLTGAEIRK	hypothetical protein IF2G_07822 [Cordyceps javanica]
TQW04594.1	MCVHVVLVVAVPPRAHADATSKNTQIWLPWTQSRTGPRDGWSWSIDLIGARMAVLQLVYEGGPVAVVFSSEGLDSLPRGCDFVLTMLFFITLTMIS	hypothetical protein IF2G_07823 [Cordyceps javanica]
TQW04595.1	MTGWPRRLANGSVSVMVTMSSLLSFYTCRVVLIPLIHLVAASALKVRTQQRTAPIGQLRSRSITADGDISAALLSTLVCLGLNPERTSQQFVVAVGLHHARPGNTNLKYLSSSPCSSHHLCATRFHFNSFSRSRIFELVVSLSGLVSLLAA	hypothetical protein IF2G_07824 [Cordyceps javanica]
TQW04604.1	MILRSLSRLRPATRLLPASQIGHVPWSWDAVALSRYTECRTHPAYISSHFIASHRIPSHGLDIRVSLGQEQTNCATSARLYICACVHG	hypothetical protein IF2G_07833 [Cordyceps javanica]
TQW04649.1	MRTPGGGGVGFNLPFLPCIYIWRSCSTSVSSPGSEFQLVRTILFRQSHLFAAESVLTAPDRAVAYPGFVNRDTDPYLHNRPEAQTLPTIFCPATSAVRVAQPTVVTPARALVWPSFLRNELCIDTRTILSHQCLLLPARFQRPRGFTPTSCRTCIPHRGALR	hypothetical protein IF2G_07878 [Cordyceps javanica]
TQW04651.1	MRICVRTSGQRGPPHVQARAIYCLWVAGRTTMGMPVTKWTGKCFPMREVHLKTTRRDDYDECSNADGLNCQKKERLDTI	hypothetical protein IF2G_07880 [Cordyceps javanica]
TQW04679.1	MARLDCWPALRRLQMLCKELATACPQRNARVTPGRPCQTVEEFVFMRHALQEKCVDYLLHEKAEACMAWSVTSACIEIGRRLPVLGRTSRMWRKSKTRMLVRSFFLAPLVSRSWPCLRHHRLLDKHTGTQVDKYRRVYERVGLWWIKAIDPDHCARKSSQ	hypothetical protein IF2G_07908 [Cordyceps javanica]
TQW04683.1	MTSLTYSFPLDRRVSLLKIAFFSMSSSFATLIWLGPLRLARSLRSLLLVSCKLLGRHVVALSTEQIYGTSFYRDLSPPSLGVYFLDLAADVKPQEMSRRITTAEKMTLARRSSLRPRPSSL	hypothetical protein IF2G_07912 [Cordyceps javanica]
TQW04696.1	MASTTTATVVFQSVQRKENNSTRNGDWVREAEFLGRGVCFDAPTKTMQKTTMTPTFLAGQLFARLAISCMTRPG	hypothetical protein IF2G_07925 [Cordyceps javanica]
TQW04697.1	MRLSSPQTESPAGPILQHSIHECNDARARVALVSISNVDPKQPGHSNLGVQTATTWCSNIDAVVPSRRASCWTANYSFGSEGSRQLWSRHRFSSRVPCCRCARFCRSSDWVGFFSARLVTDLVVFISTGRSRALKGRPGDAKSLACEVRYKHVRPSDTPGPAAAPSPTEPLITMETRPGHIIRGVERRTAASRMMIEKTYSVHRRPAKVLSTQHEQAQQPRSGDAKPRSVVRDVRPRFSSLSECALSWINKIILQSAYALPPKLLLLHPPLHQPKILSLQGKKRQYPPSIAARGWLSISIAPYTRVLSHRGLSLLPLFPSLPAIGYAVERMRVNFDTAQKHLPKQAGNPTTEQQSTRPAMHICDGSCDAIELVSRSIVERIGWQ	hypothetical protein IF2G_07926 [Cordyceps javanica]
TQW04704.1	MTLGVNILGTLLCRRDIRSKLLTARVGVDGPVVLKWTARCENANNARNKCSNNENKADKDANLKGTSQPKHETRQKG	hypothetical protein IF2G_07933 [Cordyceps javanica]
TQW04709.1	MRKMGADWQNQCKPRGLPVAMVTTCCTLLCHGNPRHKLYVSSERIYRVSTMRSAISRLVLRISRWQTRCEKPEGFLQGH	hypothetical protein IF2G_07938 [Cordyceps javanica]
TQW04711.1	MEPPPPFVSARFSPCIRPGAARAKLTKARTRLCWHSVSREAQQVSNDIALTSSTYVLRTYSVQLAPRRICLAPVGRQPACTAAGQKSIPTQAAADTVFASHSGNGAMTLTFHAVPSRSCLGGQPSWSATCYGRHYYNGSVHRRASVAIAILYQHSSTGCSRIEVSPTVCSRSFDPAKGPPPRPYLLMPAWGDGRVCRTRRVSTQRRYTHHVCGDEDPRANAGRHYVAAWPTAVPNSQACLSKRPWISVAARCRLLELGRSRSRLAMFSVSGVHGLKGWLMASHIVQDAITPHRLMYFGSMGRQFVTCLLCMDVTTAPITALFGSLPGVSATKAYPIPSSVALAFHIRLCYPLNAAFALPRSGSRNSRAC	hypothetical protein IF2G_07940 [Cordyceps javanica]
TQW04725.1	MMDDGLWMDGWMDGQAGRQAVIGKQAKIVAVDVIGIGCTNATRFAVYRPSRLLFFRTGTIAKAIKPADLSLPLSLSLSLTSTQ	hypothetical protein IF2G_07954 [Cordyceps javanica]
TQW04729.1	MPIKVAFFLSIHLTLAMMTLCTKTRLRCPSGCAGLGHRLKKNPAGNIPLCWSVRGTRPLVMARPLGRVSVGGNIRACFLLDWPWRPIEPGSRG	hypothetical protein IF2G_07958 [Cordyceps javanica]
TQW04730.1	MFPFTLAISVDWLGTELLLTDCPKVAQQQHMTAHHVTTRSFYEKLPKSILIDYAAYQ	hypothetical protein IF2G_07959 [Cordyceps javanica]
TQW04745.1	MPCACASWCPCACRCTSMHLVITCALYPRHHFHTYHPGPDEHGPIQRHHRLPSTTARRSLTGHYRHSNPWSLFRPPSVLTSSWLLSARHPSV	hypothetical protein IF2G_07974 [Cordyceps javanica]
TQW04747.1	MKHVSPTTFSLLKISIGPYFWRTCNIDRRSANVDGAGDITTRIDLLAKRLLIARNGADAIYCLYRGCVYETEITGCDDYASKVTVDRSRPKILM	hypothetical protein IF2G_07976 [Cordyceps javanica]
TQW04752.1	MVMASQLSFTSAAPHVFSLQTLRVDQDEVWCLRTGQFIANISGKCGKLGTGGYWQYGPCSTRINAARCPPPSPFCLLWSVTKQWSDELGRRQLQALAILALEPVGMRSPSIFF	hypothetical protein IF2G_07981 [Cordyceps javanica]
TQW04754.1	MQELGRWCGFCLINATCEKRSSPLVKRYNISDLPRHEDRGDEPRGIRSTEYQYP	rRNA processing/ribosome biogenesis domain-containing protein [Cordyceps javanica]
TQW04756.1	MRNLRFVLPFYGVVSSGVNGKHKILWHLSNTTLALGLGGLTTGAGICPVCHL	hypothetical protein IF2G_07985 [Cordyceps javanica]
TQW04768.1	MIPGCRLQGHAQGHASDRRGHLLPLIKIPRVLSFSSCPLFPFFFGLCFSLLCFTNAGPERQGSPPLLTRLGGRHRKLWLLAGDGSPLLPCYNYIIQAERLHLKCDTPSVVPKPACAMSQAVQHRVRHGMRRRKDAWAADGNHRAEPQINRSCMYPYGRLQSVTTRYGLQIGDFTIWWAVSVQSTEYTESSLIKPFSTDRYQ	hypothetical protein IF2G_07411 [Cordyceps javanica]
TQW04769.1	MTADSPFHVDSIVPVRVAHFCCGLMDATPSLGKISTSDLPFLARTIGFLSIVQN	hypothetical protein IF2G_07412 [Cordyceps javanica]
TQW04778.1	MSWCQGKCHAARCPVGDISPFLLGRAYMGVVVIFISLMIRDASRSGMTAMTRSQNSADLPTLVARIPGGH	hypothetical protein IF2G_07421 [Cordyceps javanica]
TQW04781.1	MGYIGCSGPTDCCPLKRGGTSKPITSSIVTLNPFGGKGGGRLTALQPRAKQPSQITRFVDARTVFDVYSLSCIVPRASHIIYPACHGAAAQHGIARPDLAKQASSLSTRSCLLAPSIARCP	hypothetical protein IF2G_07424 [Cordyceps javanica]
TQW04787.1	MIHHGAPAKEHIHASISIHAGTHTQTSSSLKDLDIRFPTTGQGRPLGLQKLRSPSYIATSHRRVRLVLTGKAPPA	hypothetical protein IF2G_07430 [Cordyceps javanica]
TQW04788.1	MLKSGHQAGRNGLACLRCQKECHVTLLCWKRVWTMSPNLNKAGSHFLGQVTRQGRRREGGRPIGR	phorbol esters/diacylglycerol binding domain (C1 domain) domain-containing protein [Cordyceps javanica]
TQW04789.1	MREEGGEGDEGGCRPLRSSSEEGACMRRRLAAGMRGRQVIFCQSGFLLLSPPSQNAWETAESGERRAESGGSLLQARKKKKQYTEYTISVCQRSLAEGETCNVLAKAASFWAAPAAAKRHVG	hypothetical protein IF2G_07432 [Cordyceps javanica]
TQW04790.1	MHVRITEYGLRSAEQRLSLAHFPLPARCLLPVACCPSLFVIIVSPSMAIESPPPLPLLFLLLLVPTHCHARRASSLRCKAMRCLPPPPPSPPPPPPPSLHHHYHHNHDNSRRRQIGHLVANPPLTPQQKASQGHPQQPKK	hypothetical protein IF2G_07433 [Cordyceps javanica]
TQW04792.1	MAARNTGLSKEVASPSLGQRKPPIQSRMFRRFELVSGDVLLATPLPTRHDSREMINTANSFLSPRIFVYARSKRVGLLLASRSPPFSWPLFPTLVATRTRFGRVASHSTHRRFSLWTRRASNGHTGWLLKICGFYSHSRALTIHPMYGSG	hypothetical protein IF2G_07435 [Cordyceps javanica]
TQW04797.1	MRQRIRGRTKRSRRWKSKEGNATMRMGIGTGMGANQGDGAAKRALRAGETRLPGCQGMDSVSWMIWDIHYPQPRTEKEEGTGEQDGRAKSERRIADPLLFYQRLGPG	hypothetical protein IF2G_07440 [Cordyceps javanica]
TQW04802.1	MRPHFFPLPFLSFAVIWTSPSDRGETMEMGGGLPPPNVQMVQAPEKAVESHIQLLYLVLAALHPKLSNAHGATLYGRSPDWPITPSSPP	hypothetical protein IF2G_07445 [Cordyceps javanica]
TQW04831.1	MLIVDLYRPCSHTRCVRARGLEDRLISIEIEVVLISYRGERREAHDGSNSTPITKGRRSRCSTFQTYLDKMFFAVLSNPQMCCGLERKENVLLWWRPANAIFARAATRPAGGIT	hypothetical protein IF2G_07474 [Cordyceps javanica]
TQW04836.1	MHVPHQATHDCVESRVAVSHERVSKNTPVYGVSEVNLARQVSPYFLGSSTG	hypothetical protein IF2G_07479 [Cordyceps javanica]
TQW04842.1	MKFASRIENKRGAAFELYQSGFRGTNGSDRNVRLFGKLWVHLLQFGYPDERHGVSGEQGNKPAMKIEQDQIKG	hypothetical protein IF2G_07485 [Cordyceps javanica]
TQW04843.1	MLCLPPALFVLRATPFYSQTLYPTLCIIRCAFFALASIPHLRLQFLGLASDLAHTHANARRSVHCLSTAQPRPTIRRVDGTRNGDCFVSIMLLPIYNHMYRAHDRQWRV	hypothetical protein IF2G_07486 [Cordyceps javanica]
TQW04853.1	MYTVLQLDGSACGVSFGWRTWTCAGRATGDQQPPGGGNTARYRRLLQWLQEGPAEVASQASVTGEVGGVAAPAQGQRPTKVPGETLKNYNTGKTRITHATCRGASTGHGPQFPQESTKMLVSAPSTSVTLSVSLRRVLVPGPRKKRHLPRPWAPMPSQAPRGFYRLASSHVLFSFSPS	hypothetical protein IF2G_07496 [Cordyceps javanica]
TQW04858.1	MHRETRLSADRPGRTTADETTHTRSKEKNSPNRASARHPARIGLGGPALLCKLSETQKVRVKEGQQSLNHPSPAEVTRRSVSRRDGNKMLPEKGYGQRRLWWRSSFSRATKPRVLGRHDMVRLAGQYQPRYG	hypothetical protein IF2G_07501 [Cordyceps javanica]
TQW04876.1	MSLSKDRFGRAVVTLAVEWIASAIITFPGFPLSLFEASVDPMCRIADAQGLQNKLSRSQSPRTRGWRVERAMTMESYQ	hypothetical protein IF2G_07519 [Cordyceps javanica]
TQW04888.1	MVYEYRYSYTRRHNFVIGMYYHLPGFSTTKQLFCNPLASYTGYLVYLNTRAL	hypothetical protein IF2G_07531 [Cordyceps javanica]
TQW04916.1	MKTENVSSSSYLPVCKALKGVSGVLDNTVQRRLYISYMANGGHDRLGTPNRSYRCYYTSTVTAPFPLAYSRHVPVGEQSWLMTGIAIWFPSEAGAMERHRSMGNSSRCSKWTLMGQ	hypothetical protein IF2G_07559 [Cordyceps javanica]
TQW04921.1	MRPTSSAGVVALVWSFSTSLRARSTHQPIEDYGNYYERVSSTTVSIVFPRLGVVNLFDRGCSSWIAAGFPRTGGPPHIPANTSMERAMVCTAAAVGK	hypothetical protein IF2G_07564 [Cordyceps javanica]
TQW04935.1	MTPRVHWQNSFVMLYSDRPADLPQKSFFSNHLNVFCYPAASHIAIMTMIMKLLMHLVACVLLTNFVAVGLPSKWQQGRDMSCPERASF	hypothetical protein IF2G_07578 [Cordyceps javanica]
TQW04949.1	MSNRILELPMLIETKRLEKRSASTRRRNVGPLPKPERQPARYLPLFWLAHKRKPHS	hypothetical protein IF2G_07592 [Cordyceps javanica]
TQW04951.1	MRWLPSELRNQIFRDVLCVGKIDPWGHSYLGPLTPGLLSLNRGISAGALDIFYGENCFDLRIFKSNHTATFIHNIGSNAKKIKVVHIDVNLCPDDSGPDQDTTDLIDLLRKSCENLIKVIVSMPEKCDLDTAAAAHVVSKIPRLGDIEISIYSEEHNGTETLPVEIKLAKQHVMDQYSNRIDEPDCLECSRWRSSPDTAPDRHPHLLGSLARNEQSDASFLREINLMILCDAKDMKEIRYPEPGRTIISANGKLRHVEWEDFSMQFFFTTVRRPMLCKQHLPWLCLQ	hypothetical protein IF2G_07594 [Cordyceps javanica]
TQW04961.1	MRSNPTPGVPVQFQCMTHIGAGMCLPENEKEIPARTATGWMWTRQSILARFKGATSQQSCFASGRCRPVDQIDRRPRTEYAVGDLVVQVDWERLIVFGAEN	hypothetical protein IF2G_07604 [Cordyceps javanica]
TQW04962.1	MGLWPLCVFYFISSCLFSLEATASHRFGPRCSIQWPAEELHCHANDATYQVGGCDWLPRLPKTNSSAAELHNLPSSPLISHVRIHMQAHARAYRPQLLLAGACGESPPTNAVYQYIDKRPQYSAPSQPTQKFLHAVFSCRCQQHPQVSSAETRLVLVSSTSTDSTTVAVMDGIWYGTAPHMCVCGRKVPTRAAQDRPLAAILIISESLAKIEPSPHLPCRVVSGRQLRDTRACRLRGGKICLHFTNHQGVELLDSWSIPDPCAFAGATTGTIVRLSHPGAKEFAAAWSEVLASGDLFLMYRGGDGGAITSRKKQGEISRDISFTLESFKLQHETWERVEAHLANPTAHSLPVGLIYTALYIVDEKEGGAEAVPVSVVTTGSCQLPGEVAGKCPPSPCPC…	hypothetical protein IF2G_07605 [Cordyceps javanica]
TQW04963.1	MKAVACLFASSSGHLSLECSLCFANTPRYMARDGSAMRYAGMLSHLSLHASRYPVSLLFLLFRSFVPYFFCALCFGVVVCGFGSGQWVRNKLALTRSAL	hypothetical protein IF2G_07606 [Cordyceps javanica]
TQW04965.1	MRRANCLDPSSPPPARSSCATDSPCPRGLPRAVRAANVNGSKSRDRDRERKKRVSQLMPSRPLYHLSRLHLSTCGCNGHALSVPTTAAADISCRHFQRETKLCDGVKLDIDGKKSSPPTFFLKPASCSLQHQMPRQRVTTFRNRWPQHESPRDPHTWCAFEPVTDGCCSLSR	hypothetical protein IF2G_07608 [Cordyceps javanica]
TQW04968.1	MSELFARFAACLAWPGRAMSEEPSVSSFLCFRQRLAPHPSRTHRGSDQHLFPTEMSTIIHVQVPILVRSALGMTV	hypothetical protein IF2G_07611 [Cordyceps javanica]
TQW04969.1	MRVLRSPPPHGKPQSWKRTRVVLIIQDAVRNVLAWPCSKLYFISQTQSSGITEEIGQMQKAVNLWAHMLSFNHSPSGITNRALSGGILGQLLRLSNVRIIGWRGTMPRRWPHQRTCGLLCKYLETT	hypothetical protein IF2G_07612 [Cordyceps javanica]
TQW04992.1	MACFSISLPGQASEGEAVAKDWRVYTMWSPVTVMRSSKAATILFTSRPVGQSTSQTERSLSRQSFSVSLAGAVGAFRSTPPSASLQRRTGLK	hypothetical protein IF2G_07635 [Cordyceps javanica]
TQW04993.1	MKSCPQPPGAPWLYDKSQFGNVDAALVRRGGRKGEQARPKCRLAPRSSLAFP	hypothetical protein IF2G_07636 [Cordyceps javanica]
TQW05007.1	MSFAMNESVPPSRVKALSGRAVLDKAAFGGRERVALLRQNYPKKPKRIRCVTGSGDLDRAPEQRAGGADVCAFDLFKLSRRSRFVAGTCSCALAPVDALVFPSIETGFGREEKKEERVYCGCFSMTAKGGTSRSLILSQASTSNLPATKLAASSNAAPSSGTEQQAVQLAGDVGREQL	hypothetical protein IF2G_07650 [Cordyceps javanica]
TQW05008.1	MWLGALGAAGTEFRAQWQIDTYFDSVCLLACSDLRSWEQSCTYSTPYLALLNSKK	hypothetical protein IF2G_07651 [Cordyceps javanica]
TQW05009.1	MSRKCVMAIACLFWVCRLMHDGSSTASRCGKGRPNRALWRRKGPESRSGAGRTPARCGADMPGQCASALGRRSDVVRAAGRSWGTLEEEEGGGVEFGSLARSSPERPSREGEKKVAVAVEDETWFYLYRATQRPRLLRKPPRNTARACFCCGDITTRRMLEE	hypothetical protein IF2G_07652 [Cordyceps javanica]
TQW05013.1	MPGPTKYEKRAIWQDGICPRPWLSSRGLQSGTYHFICSLPLRVQSPTSGRIKYGDYCRYDNLTFARPVYQISRPCDFAGRWLTRVFLLSCRLDSCILLGESMVRTGAQVVAEGLSMESKAKEIDGIICSLGWAWSQVHQSGHHSVKVAASRSCRDGMFSCPRLDHAGGLVRDSVTDGGIDETTLWGMMRGARISYPQFLLRIIDSEDGFDLAAASLLVSVRKLRS	hypothetical protein IF2G_07656 [Cordyceps javanica]
TQW05032.1	MLVKLYSPRAIFPSRQCVQTLLSCRISGFVTAYINNPSIFVRHVLLLVYMLIRAMRPDVLAPEPACWAISNDDCAHSLFQYRM	hypothetical protein IF2G_07675 [Cordyceps javanica]
TQW05036.1	MRIKLSGIDVPKNRQNYALAIAQYSRAPLGTVKIRGASMISPASSRSRNSS	hypothetical protein IF2G_07679 [Cordyceps javanica]
TQW05048.1	MSVSGTAREGVGKAGACAAIDDGVGFSEVRAWSGQGDVRTGRVRGVVEVDEYGDGGGGGVGSRRGGGGEDARKPIGRRRKQDALGNAKEEKKDIRYRGRVIPKGSDRCGRGKRTFFLEGEPD	hypothetical protein IF2G_07691 [Cordyceps javanica]
TQW05049.1	MTLPPRIHCAAANAIGDGPRMFQLLRDHLSRPPFPVSEVRHALVGGPPPLANRRGPHSRSLVGRDIMHVTCRANIR	hypothetical protein IF2G_07692 [Cordyceps javanica]
TQW05072.1	MGFSTTPGGARRDKCKEAEASPRRKAFRRYDIPPREWEKQNCHESQTACLIHLDLQPRNVSGSAQGRNQLTALCIRRADMLICFSNVNKSGRRTSTDRICIKNWQSGGAGA	hypothetical protein IF2G_07715 [Cordyceps javanica]
TQW05090.1	MSRRRLAGYFLLMDSFPTPLPTAWGSSLTGSERAFGRGKTCNFMQKGHGWLRMVGNANNRRESRACYFRTTPSGDPTLVVGAYLGTYLGTYLGQVGT	hypothetical protein IF2G_07027 [Cordyceps javanica]
TQW05092.1	MRDGFSSQLNPDVAHVSPGLSARLLHRIRLLRSPRAGARGPLPYQTVAGCVLQKGADFRPGLPAWDHCTADMNGGTTSYGGVVLRMSAREYCSMMRKRLKGIALLGKDGVRHFVSS	hypothetical protein IF2G_07029 [Cordyceps javanica]
TQW05103.1	MNSGDCAQDISLSVRLVCALFLPDGGQLWRYYSLEEASRPIREDLLCTDTCMHILAVVQPSSPQSTPAHDAMSMFFS	hypothetical protein IF2G_07040 [Cordyceps javanica]
TQW05104.1	MGRKQMDFYDIERYQALYGRGKNTVLGRKGAHIKAKTFVFFVSAFLDKIEKNRVYYSTKKGFGIIRL	hypothetical protein IF2G_07041 [Cordyceps javanica]
TQW05106.1	MLRRRLPRYSLPAQYGGLPFRLADHVWDPCIATTSTHGDTEHDCQTCLNILILVCRVSGLAAACLPESFYTPSRLNFSSLGERGRAAG	hypothetical protein IF2G_07043 [Cordyceps javanica]
TQW05130.1	MNAFYGLEDPTGATASNAGDEPYRIEAMAAETRSSPIDQSISCANSRQNRQASGRSRRYASHCQSHAIYRAGGNDKGSTQSKTIPGDVHHSYDSRTIAFATPGVLLSFHEHRGNKLVRRQDSPAIPRFSILASLAS	hypothetical protein IF2G_07067 [Cordyceps javanica]
TQW05134.1	MGNDKWKWEWDRDSLTRGIGMVSKRFRFSSHSGMDRNLRITCWFDSSVGSCQRDKKKGRIF	hypothetical protein IF2G_07071 [Cordyceps javanica]
TQW05137.1	MLRGCSLEGQLGKRSFDNETTLRSLSHYTVGYRLLLHVMMMSTCAQIPSPLWQKPLIHKNPHHHFSHPLTLNTRLLSLACRRAKE	hypothetical protein IF2G_07074 [Cordyceps javanica]
TQW05147.1	MSDPRFCPRSAKTDAQRRQPIQCQTTTSVLERLLRAHLVLVGMRLSTLKPQNQLPAYDEHPHATAFAYGRYGHKGTSQDVVIRHHSPVDSKPTWSLLVEPSIPHPPYFTFLFCVSPRRHLTHLAHCQRQLLPMLLNWLAGTCAVASVGSPARRSALSRPWLLCLSRHHEPGLVSSWQLDSLWILLNILFPVNLAMSLASSYPCLQPGSSVASTLSVYIIV	hypothetical protein IF2G_07084 [Cordyceps javanica]
TQW05156.1	MLIAFFRATFAPASIIGAIPNQHYESRQSSALAAHPTWYSLVVLAQWERPLEILQLPQPRS	hypothetical protein IF2G_07093 [Cordyceps javanica]
TQW05166.1	MVTFSMTDMKRFDYGCMNPVSQLKSQSQKSPFDPPSTLAPALSTTLPSCRFLWAGLHMGPPSSKEDLSVLKACAGTEDVGSTGRRRE	hypothetical protein IF2G_07103 [Cordyceps javanica]
TQW05198.1	MVNAYDHCLRLHHSRRNQSFPLSYAHDTRKMCFAIIGDGMKFYSASCWIPAQVAATDTTCRQDANAESLTG	hypothetical protein IF2G_07135 [Cordyceps javanica]
TQW05201.1	MRYIMILAASVTASRGYRVKGISRCSRRVLILCVLVSVDDCARLQGSHAVSARVTLHHTGHGEAAERC	hypothetical protein IF2G_07138 [Cordyceps javanica]
TQW05203.1	MFMSVGLRGRKGKEEQGEGGGGGCGGGGGGGVEEEMGCKGEQGCCLHYVCVWARMVMVMTMMMMMMAEMGRGWAMMGLREWEMGKKRKKKRKRIDCRGGQHQIRLACEGEQVGFSGIKKVKARLAGCWAQASNGLDRTDPQMQASSSKAGMSRSTKRPCK	hypothetical protein IF2G_07140 [Cordyceps javanica]
TQW05209.1	MGSGAARWPGRTRTNRQRDARCRHCVRAGHGLRVEMMGQKSSQDKRGKEIETENVQAAICRDESAPVNRSRS	hypothetical protein IF2G_07146 [Cordyceps javanica]
TQW05229.1	MYVIFLLLRTRLLFSACSLIHWEPYTPYSVDRQTSHARACHVESHWTKKCTSCRRVHLPADGTSPNKRPRFYRYTENPSANTAKDQGRGAKGQGSQSQVVLPSISTEYRPLIDILRGIVSFTPQPTQSLREQRARECE	hypothetical protein IF2G_07166 [Cordyceps javanica]
TQW05232.1	MGSPTTALLGAAEPSVPHTLRHRLIETASPDSDNCWAAAFHPFLLRIPCRFQARYICSCQRSIHTCVCHVPIQPDVYTLFCLSIDTYSP	hypothetical protein IF2G_07169 [Cordyceps javanica]
TQW05239.1	MPKKQVRTLGRREEPEQDKSSTPQRQRRQKGCLAVPHGAKSRAHTIPMPSCVAASLGKLGRLCATTHTWMASVHVWSWLTPLGAVPRPFFFQHEAGLPSTLDSPAKLIMCHRHAVGVGRDGTPTFCSL	hypothetical protein IF2G_07176 [Cordyceps javanica]
TQW05240.1	MDGFGMIGALALRRRTTELFPHAKAKDFPHQGTAKLDARCDVNLQGRRDVKDDCHSWLYSTTQIARAVSGPHFDDNNGRLRLDLEYIREVSAPGAFLGTIRNEKIK	hypothetical protein IF2G_07177 [Cordyceps javanica]
TQW05241.1	MCAHQAKREGSAETFTRAGVWVPQACHAGAAAWSRGPGLASVSESIVLVWSGMSATFQQLVARRPGYAVNRMKPCGFGAILELSNSFFKWRRLHASVVTRVLSIRPC	hypothetical protein IF2G_07178 [Cordyceps javanica]
TQW05242.1	MRTEVLTNQRFRATSEKLVIGFSLASSTSRISPPPLMMYVRQWTVAPTPVAHAVLARRIRRSSTPLTYHPGAKNNIVNLDLTWSTIIEDLSVISDYEPTSDVGRWPCLFHPNTNLTPAHCHRNYSAQSVKRSGEKAPNTAFCPELLTHHSSCDIFTYISPPPWRLGSMIHLCTMFRYYSSQHCKSSVTARSRLQAACFCFSSFEVYSTTVQVSVTRLNI	hypothetical protein IF2G_07179 [Cordyceps javanica]
TQW05243.1	MLPTLVRCKRANPAGTRAVVYMSLRRNVVSFVLPYYLVCGMRLTCASRKTCQLKDCAIDTISRRPRGLSVLPFRCIAVRCYQ	hypothetical protein IF2G_07180 [Cordyceps javanica]
TQW05244.1	MDAAFKWRLVTCLPQVYQLPDGTELLAAKKGSGFNRSVGSKGYQAGKAKLVDSSTWLNVNRSGSQRAGP	hypothetical protein IF2G_07181 [Cordyceps javanica]
TQW05249.1	MKLLVITTYHYSYRRRELQQAQTHTDADAGHGSSANGGGTLPLAETNKVTIILESRSTAGHSLPVPGDLGSVVSPLLRYQYLYQLTTSTRPAPVWPMSRSCRDWAAPALWQVLNLITYWYLPNYGVPYLPTSTLYSRTAYRTPYFAVIRTRTE	hypothetical protein IF2G_07186 [Cordyceps javanica]
TQW05260.1	MNFNCNGGSYSSWRVCENVERKVVREGSKVMSKERGRGGKPKQRQRPWQQTEQANCSPIAPSLFSFGGKRVELEQAALTSRFYLIVRIDKQTSDSADAHRPRSGSLSSFDWEGANGGQLLQIHQRETVLIGKRRGIAVHADQQWRPTQRSCSVVEGSSERRSLQNSMGRCR	hypothetical protein IF2G_07197 [Cordyceps javanica]
TQW05265.1	MWAFSPAVSRTRQTKRKAAILGSKNQPGVYHLKPENSSAQRLDLAVYFTIKPSCTWKWSHDI	hypothetical protein IF2G_07202 [Cordyceps javanica]
TQW05282.1	MSSQSRIASAVPYNCSLIVRRRRPSPTCWRARSVPNTNYGVALSVKVADSGYPWTVASKYAAVNSLR	hypothetical protein IF2G_07219 [Cordyceps javanica]
TQW05283.1	MPAKQQNGATWSPQFLLDALLIETAWHMLGYLEDFTLRKSELGILRGNLTPQTLYVSGSEFGHWTQAPPATLGD	hypothetical protein IF2G_07220 [Cordyceps javanica]
TQW05288.1	MPVIVASRPSVLSTQVSEVPSSHLKGNPTGRDLLLHLLFLSYLLFGQVGQLFITTTCTASLPALHRRGPVCDRISVVNDRH	hypothetical protein IF2G_07225 [Cordyceps javanica]
TQW05292.1	MACFVLLNAVFLKTNDLTETPCVTGFGHGCSCPKASVSTVAWNQIVFFDKSAIKVSKEEDVLGELPDVLEPACSRSVYRVVGVL	hypothetical protein IF2G_07229 [Cordyceps javanica]
TQW05296.1	MPHLYSDRHVAPHDIIDKPVAGPLSYSLSGVDFISARLVRIDKSFAIAFQGLPELAHALAIQIRIKTTQCLPVRSTAAQLHCQAEPIFNSQNCIQSHCSSSRKFRRM	hypothetical protein IF2G_07233 [Cordyceps javanica]
TQW05310.1	MLYSVRRNVFVFDIKSDRMRSRIWEVFIRTKCRLWSGVDVVWRCTRLESTK	hypothetical protein IF2G_07247 [Cordyceps javanica]
TQW05312.1	MIVPALTKVARLHLLKGAVVVQKCAIGGCSLQRRTSSSHIKVLGKGQVASALSRCLENSVDGFLWSRVIALMKCRWQQNPLGPKHGRNVDLDALFLNATTTNGQSLGDRVFRDKPDDY	hypothetical protein IF2G_07249 [Cordyceps javanica]
TQW05316.1	MKPVRDRAWPTTSTPCSSATQDVTKFTDDAHWITTSSCDVYAVRADADQVCSEAKKTLWERQLKGKGEVGNRRIVVIIGVFKTGQFLGLNLSTSKGEAILKGQMSRRCIVDVLSRLAWPRLRREQDNTQ	hypothetical protein IF2G_07253 [Cordyceps javanica]
TQW05318.1	MATSLGPGLQYRGNGHGLSVSQKELVERRESPGQGFHGTETFRSAGEKRCRVGCRVTSIVNESLCFPWLSRGEGGPSQRHPHQLVNGNWGHNMSGLATVDGTRT	hypothetical protein IF2G_07255 [Cordyceps javanica]
TQW05338.1	MEDCDNFYKSQRSGSCEAGRELGAKWSKHQVLGLALCRANGLAGLMCTAASAPSWHVVGTSALYA	hypothetical protein IF2G_07275 [Cordyceps javanica]
TQW05345.1	MVSTERLSSAFWNRDGCVEEGSVWSGSRLTTSRKSRTSVSSPSVRYCAGSKDSSLTSFDAARRPIVGDRTLAASPSASDSANTSGTATISLHNKTSVVHALFLVAVATTWLPWAALATSTAISIRGKGDFFVSSPSTRFCADQRSSQESRSHGPISDMGAIDENAESWQISGYARTLARLCACFSACLGLRIRYVSETDGVALGPPSTWSRTCAGGMSISIDAFFFESLFGDDCNFSISPTCQAATVIRGQRPDQGPELRDPRRHQQQILQKALDGALQLGARRMAQHAEPARQQPRPEGFRPAEQQAVGRRGVAQHGRRLVDGEAQEGERLERLATVAGSVEKRRVVVVEARGVEHHPAVDVDEHVVVLGALRRRPQQ	hypothetical protein IF2G_07282 [Cordyceps javanica]
TQW05362.1	MPEERNVTRKCFQLRTNIPNNRSYLLSVPHGVHRCRLHCAWHDERCLQWASWSCVSRRNISSVTCIQLHVPHSLSPITTTLYPNIHFATTSILTCLAQRTCETTCTRPVLPSKARQ	hypothetical protein IF2G_07299 [Cordyceps javanica]
TQW05365.1	MSSLGGVALSWTHTRQRRRVSFILKEQTRDTLFSNAWTGCIVSVKPCPSAARLSHLVLERYDLNHTAKLGSRTYLAYHPKSIDQKQFRRCHKIKNVVISHRICRALNTGAAATPYSFVAENRHHWYTIVPPSRRWARRPAEAK	hypothetical protein IF2G_07302 [Cordyceps javanica]
TQW05368.1	MYILSLSFLILLPTIRAGGIIARATASMGSQITNGAPMSFFFYSYLLLFFCNMCDGRLKIVE	hypothetical protein IF2G_07305 [Cordyceps javanica]
TQW05370.1	MTGEKPAIIQTLFLAGVHTMLPDEVLLFPRPFVHLPIRESFNVKVYQTRTRAIQGQGTAGYSGSFPLRQDFSVLSRDTEHDMSLFPLG	hypothetical protein IF2G_07307 [Cordyceps javanica]
TQW05392.1	MELETVTRARTTSLVTVVNASHFSLLCYIQPLTNTNACFPTTVSRSRSSRGTDKYFDKGSGNTLPPN	hypothetical protein IF2G_07329 [Cordyceps javanica]
TQW05394.1	MTATRAQESKAAGGAVTRWVECERRVNEASQAVDSTVQKTYSSVTFYVLCAVCSLRLGFKLPTVQIRCDDTEYCRPAISKGPSSSFFGFFACTHAFMLQPVIIGKVNEQTRCLNFPPYQQMHKARRRNTMHKGLGALPPPRLDGYHQETSKGARVFLCKRQSRNHESAAHAPSPRHGPATTSTPTGYQYEDDPPVASTGDPYTT	hypothetical protein IF2G_07331 [Cordyceps javanica]
TQW05395.1	MLKHLSAHSGRPRFGGSFANTVSPAQVLLNGTWCHHHTPAVTLASELLTTEYEWGRHWDLDDLSPLLSPAARLGWQESGRNFLWALLAGPAQVAGHRFTPSLLCVATTTIRSAYSVLLSRSCRTKRCGKGG	hypothetical protein IF2G_07332 [Cordyceps javanica]
TQW05404.1	MGRISAGKSLLLKGILGDVAGISGEIAFEEGASFAYCSQTPWLENVSAEENWTRRGTAKNWNQLDKIARNYGLKDIQELHDYRTGAIGSQGVKLSGGQRQRLALARAATLERDVLLLDDVFSALNRRTKLRVAERLLRSRDDRNQSTVIFSTHDEHIANMADEVYEINQSGTLVRRPTTEPASEALSDDGDLSPEAKEEVATSETSQTSPSDTISPPSPDPRVKDMDVYKTYLRSMGLGNAVVFLLLGGLYGLDEDAQHRMEMLIESKFQDKTIISVCHKLPWALKSDRIIVLEKGEIIHDGATRDIVKESTLFAGASLPDIE	multidrug resistance protein MDR [Cordyceps javanica]
TQW05417.1	MNRSSIFGDGNLESTVPASWHTPRTFLSRRVCVKILTRYRAKVYASDLYSSHFANDRPSPAGLDEWRCRVLELDSSLSRVGVRDGLMGRILDVDILMNPVSQSPCFLR	hypothetical protein IF2G_07354 [Cordyceps javanica]
TQW05434.1	MGEMGTEARDVTGQSMGRRIPCPRSRRARRLAHRKPRRLGERDDTHTHARHTHMSPLTTAGSRYLERVTLYENSDPPSSGGREAASRERIAKLGRAGPVHICIVQGSRVHQNSNPKKRPEKALFLFCPYDSTVCTGMMS	hypothetical protein IF2G_07371 [Cordyceps javanica]
TQW05435.1	MSVCWSSELLRSKSQTCALGVECKKDDESCEPARREWNEREVVGKQDKQRDMRIFKSMDERGKKKNRHYHHYHHHPPSPFLDGRLSRGSPLPALLRPPILTCKESFAWTVTDVAVKQ	hypothetical protein IF2G_07372 [Cordyceps javanica]
TQW05436.1	MPRRTGERHCQEATIGHFLSGCAALTGKKSLYWLEARRMTCSRRLSLLEGPAGAVFDPNSSPPNGDDGHMSLFRASNIHGLVSSLLMVRGDLPRSNEPRSWDGSGRTLMLSFSILQSG	hypothetical protein IF2G_07373 [Cordyceps javanica]
TQW05444.1	MNRLSSTEYLVVTDPLRCISRAVSPSGRRRTRWCPCTRCPCTRVPDGPDMPICSLARSLLSLHLFFFWAALRLILCHTESRNAVGAIETAPSNLVPPRRPPQHCTRARTRVPVSPRFDLTNP	hypothetical protein IF2G_07381 [Cordyceps javanica]
TQW05452.1	MKLRKSDQSSAAFAFDKCSSYLLAKRFRAPVKSQVQSRNQLTRPSLLFCRQSLLGVWLTTLKLRRLCDKYSTVDQLLSLYITHAILSSTFKYNPLFRCQAPLRNIALLHYTAPHLWYAGLSFSHGIFPTTLIKRKRLENHLVPLLLRPTCVSVSQDAGAPR	hypothetical protein IF2G_07389 [Cordyceps javanica]
TQW05460.1	MPVMESRDRTQLRLTASEPSQSINMDFSVGRAGTPHGAPNRQRITANAPNHPISWFAHLLVPAAFIKEQEKKRKTDACYLLCNSTDYLYSRLYRVRLPFFLRKYSSILALKNATGYFRPAPTFIYRYSQS	hypothetical protein IF2G_07397 [Cordyceps javanica]
TQW05461.1	MRYYTIHYIANRCGTMHRLAGCDCLSAAEASPAIALICLPHRDWARPGPLPGRRALNGASETALCCRDIDICVPRDSISASPHVLAQCI	hypothetical protein IF2G_07398 [Cordyceps javanica]
TQW05463.1	MKDRCCDRQGRWWLTPWRCRVGGDHKLSRNATVANARRDNQFPIHRCRAEIC	hypothetical protein IF2G_07400 [Cordyceps javanica]
TQW05464.1	MGRWPYLGSCSAIFPGLAQWRWRCRHGLSSPNLGWGGGVSTRNMFFGMTTAGVGWKGVLTKDHVCLRRGRLDCVAGVQVRNERHDGRVLGGDLGGARFAAHERDRLGGEARVGEPVQDLAADEARSAGAAGDELVLGVLVAWLEGLGALFLHEDATHWYACFARNKWMRCTGGKKKTKVLERKKECDSSD	hypothetical protein IF2G_06586 [Cordyceps javanica]
TQW05473.1	MNKGPDSSFVHLLLSFTFTKVYPSEYLAWLTWPSRFLPNKRRLAAKPRSTRYQPASTWQLVTLPNFMCLTNSRHYSGPPSSRSITQYAVSYQHLSA	hypothetical protein IF2G_06595 [Cordyceps javanica]
TQW05482.1	MQPRIVGVPTQLMFHLGHTNSCAALRLPPVPAAPPLLRGPLDEAAPPTPQQGLSITSPKQRLNLAVNLRQPAQPARRCPNQTPDRVRWPAAAHVMSHVLADARANTL	hypothetical protein IF2G_06604 [Cordyceps javanica]
TQW05483.1	MNRATGVAPPIACHVVVDYSLTAQNNGGGAITPGPWPGLDSPIPPKQPPPPLASLFSLTRKEDDYSQKQRVSYRDGLPFQKQGRV	hypothetical protein IF2G_06605 [Cordyceps javanica]
TQW05492.1	MTQKPTVYRAAKQRRRQSHRDLNRTLTLYPKCGFSSSSAHIPLMKRNETESTHDENKHLDTVVHHRSISFAFSLLQAVSWPPLSRCRAEQG	hypothetical protein IF2G_06614 [Cordyceps javanica]
TQW05510.1	MYELKSGIEPSIAFSGKKNPVQFRRDIFDHVVLLCDLVHGHFILGLLLMKIPKMWLACLKVRAVCTRCSDTPANYASVCLGQLYRAHKDLVGLYVEQICAACSFCSPQVGVLCEQGTGQRCLAACLPHLRYHKRDCLYCSCESILTTLVVSYRMQE	hypothetical protein IF2G_06632 [Cordyceps javanica]
TQW05527.1	MSLRRSEDPITSVRAYIKRRPIALWWGSEVFNMQRSFDMPNDVDESNRVLA	hypothetical protein IF2G_06649 [Cordyceps javanica]
TQW05529.1	MRELEREKVYLARHNYQAGGLYRNFGPPKDRNQHCERREDQKHDECQGTGRHGPFHFHITIKLNCSFLPVVCPRRSTRYLSTVLPCMYVRLNALVKKYGGNDASNY	hypothetical protein IF2G_06651 [Cordyceps javanica]
TQW05542.1	MRDSLFFGVLCSGCQGEDWGGGQLPVACHRSRTASKARAAPRTLPTCPAAKQSGNCLFSGSTRPHHTHGPNFLITKATQYVGGIQFTSNKPMYTEYQRELSHLWQSPRHVGNKRRDANQGLPASCKRTSPFLYRLHWASASDTLSSGGLMVRNPHWRWLGHLDWPGASANRSSAHTSAMCAQWLESGRARHAVHLYAVGTFVVAIPRSW	hypothetical protein IF2G_06664 [Cordyceps javanica]
TQW05544.1	MTGIIPRHQTHTVRVGEEEKRHHMTFVCINRPQAFSPQWGEGFALAHLHGSLLEGIKEQRLWWRSRVGARSRGVRLCMLVLSHFLIMFMCHQRPSKTRKDVTTATGIEGLLRCRGKAYFPSYFDQRRTQSPADSMLSERVRHSQECNNQDP	hypothetical protein IF2G_06666 [Cordyceps javanica]
TQW05551.1	MDEVVHSMLSRDALQYPQPAQMTGPDKRRSRSFNTVKGEEGEGRAQGYIWSDV	hypothetical protein IF2G_06673 [Cordyceps javanica]
TQW05556.1	MCQGPLSLLATMRQLLMKGLKATYSRSATHCSSVNTTFPKLLEWSSCRMSSRQTRGIMRPVFLLRSFQVTICVGD	hypothetical protein IF2G_06678 [Cordyceps javanica]
TQW05557.1	MLNSCSVPPGLAKSAIFYVYTIFAAWFTATTCPAFCPTRSLEMLRSTVLRDGVTDGSAAFGPLPFQSLGLGGLCCSGIGARRSAATWDQNLTALLRSWKRKESSGNSSTKRHAGNKIECGGVFETADAKADFLHYYHQTWSGIGRLRDGGVSNGRDYSILSPCLFAKGLSGTQRGANTGGHQETRAKGFQ	hypothetical protein IF2G_06679 [Cordyceps javanica]
TQW05558.1	MSRAVCQGGTGAFLTGIQPSPRLAALTHILTGIAIAYPIVGGLAKYSPSTMSAVKTSKWKTGTEHCTNIPSFRCYVV	hypothetical protein IF2G_06680 [Cordyceps javanica]
TQW05561.1	MWATYLQGTVQHGHPRPGTAKYLAMNMCKRLSSSTVLHPVSRFPLTAEARIHGFDTSSQAAGHNDRRCRSVGKSLTTGARGKWWPRRSTQQTMTTKQSTLARSCWSAGCLDGRFAVVWRTTQPARTESRSWVSSLFVTVVVPVSRNLARVRRLMQYMAASKLVPLPYISGY	hypothetical protein IF2G_06683 [Cordyceps javanica]
TQW05574.1	MASMITLLGRAHIPEFPSSFGRVHAVLSEGGKTGQGQLDHTKTDSPSARDMYCLVWLELLGWQVPKWNHDFGLVWQILGACAANWR	hypothetical protein IF2G_06696 [Cordyceps javanica]
TQW05584.1	MAYLFFAFSPWSLQGLAAATAGLVSTLPRHAIEVDYDPAHSHHISFWQLS	hypothetical protein IF2G_06706 [Cordyceps javanica]
TQW05586.1	MSTPRCVSCARNDRPPSTRLQIACVDRADVHHWPLKRWHDYAERRRPWVAAF	hypothetical protein IF2G_06708 [Cordyceps javanica]
TQW05587.1	MQSTLEYIPACGTPLRRAVTLNQDQTKMCKSCPIPSPIFPAHCACSSQASSVIDKLQGFVGGPTGFETAAAYL	hypothetical protein IF2G_06709 [Cordyceps javanica]
TQW05595.1	MAVASIRPFYRSRPQEYFRAAPKLLAAGSVPARGSQNYQAGVNHPLRAISVAGRVQYGAWAPCDTDNFHFSIEPCMFGFGHRRLAVPLPGTPRTNCSASILLEVRVPAGDWTCRSQRHNAQQLCICHNQFFFAPPQKLACCIDEHGHGSPAIGRLSNIP	hypothetical protein IF2G_06717 [Cordyceps javanica]
TQW05608.1	MPPGQECRALGSDLKPPVAHETNLLQLSSTALISLVTDPEIEGIQLLKREGRESGTTHNLCDCRAGSGRSHDYMS	hypothetical protein IF2G_06730 [Cordyceps javanica]
TQW05609.1	MTASYLCSAMHANKKNAGEARRHVQAAIIEYENQHVIVQQVTEHQAAECTRLT	hypothetical protein IF2G_06731 [Cordyceps javanica]
TQW05618.1	MAKHALQRSRVDDDDDDVDDDRKLDGLASGKSERPAYQETTERADGPFPRVPSCRYCPPLFSPYLIFPLILVERTLTCKDQLSPPGGARRFFFWLPGCSLVGCMLNSLLGTRFHGAEHMQRLSLSLLTPFPFPLR	hypothetical protein IF2G_06740 [Cordyceps javanica]
TQW05636.1	MKERKKERKKEIPGDSTVSHSCYVIAQSAGASTTLTSTWARRRGARHGSCLVIGRGRWMGWMGMAHATPAHRCSPAGRLCFFPGFCRGHSSSTAGPYMKLSRRRGQHSDKTWLGKVRVVENFLRSCSQVTCGKQKCQLSRGWEKKGNLAVARHPGKLVIVTDESKTRHLQLP	hypothetical protein IF2G_06758 [Cordyceps javanica]
TQW05639.1	MNSWRSGVRLAGKSYRATALQPAIFSAPCAFYPLIMSETLRYALARFGRITNLAPAIACLNRVPKAKIRTIHPSILRWVRILPSTHPLPGGGGVASLNSSTSDAF	hypothetical protein IF2G_06761 [Cordyceps javanica]
TQW05648.1	MSVACWEHLSRQVTLRVTGRSDWPLFIPTAATYPSAACLSKLCLRYLSRPHDCRALPLWQADSDSCSAVTGRHQCPWFACTGLFAAHQVGKSGAAARTTASLRTLPT	hypothetical protein IF2G_06770 [Cordyceps javanica]
TQW05649.1	MLGNLSARQLAVISERDKPERGRSRKMNIKRALLGEESLKKDPLQIAIPVMGVKVSNSESLLLPYSREEDEGLNGLSYLHIRTQLLASYMG	hypothetical protein IF2G_06771 [Cordyceps javanica]
TQW05650.1	MRWLGLQRILEECRSVPPSLSLSVQPLSRLSAIPGQLTTLLVGHYTKLLNKSLADWLAALRSLIALRPPFCTTSPPIKNLAPCSRLFFFLVLWKLNQPTTQRTLAARSDVSNWLDILYTIPPAAAPPPLLSPRGLI	hypothetical protein IF2G_06772 [Cordyceps javanica]
TQW05651.1	MPSPVKNCPWLTCICNITGQVQTLNHKMKPREKKHFAAKAGKLPLHAELARMPTLTKSSIERQLLVKLFPSPIFLAHLETQPCPHLQRPQGSFSFFLLFAFPTKAKQNPLQILFRRLRTKLHAGSDPSLRYWWGLADGLAYDLSTKLGPVASRCAGTLRGRAKQGQQGHAHTDWVLG	hypothetical protein IF2G_06773 [Cordyceps javanica]
TQW05665.1	MLVLSPVVLLLKLAKTDPALRTVLVRRTAHWTGSSVYLVFETCGLNQFALLHNLSEVSSSLWSVATGPMQTRFIPGARHERAFIRSSPAGTNTLNDELAVVGDELRGKSYDPPRPSRSAPSHQMAQPRTILIAAHCWVLFFSPLSLP	hypothetical protein IF2G_06787 [Cordyceps javanica]
TQW05667.1	MTVPHFTIYTFDFPGTRCRHKYVRPTDRFYEPPGTLTNHHQTTDYHTCLLAPGRAGLVKLLVLDVPDPVRGSDGGGVGGEWVVFSVDWDILVTNSSTRENHRRPYQNSPILANQLHQQKRPPTKKTRTQQLLGTRRRRRLRSASAQPHQPRADQLLASV	hypothetical protein IF2G_06789 [Cordyceps javanica]
TQW05669.1	MEGRGDIIGGTHLRVSVSSATQHRGERERNVTSYGGTLPKVCMCNVSALFLFSYSKPVQFLYHSICVSKRHSAALMYIQQSKSRKGQYTDCTIKSSKSQCSQMGEKRADDALGCGVAWRTSPQGTIDQPNMEKLRRKGEKKEHQEQTLGLRDSRHK	hypothetical protein IF2G_06791 [Cordyceps javanica]
TQW05685.1	MTILMEAYGYPSELLFHLLLLDRLVLRGWEKYQIQKYRQAVCRQSCFASTKLSPVYPM	hypothetical protein IF2G_06807 [Cordyceps javanica]
TQW05687.1	MTTTFFAEARNANKTSDDDGEAKCRLPQDRRGREKQSIALVKVEEPENAREARRSEPKCRRW	hypothetical protein IF2G_06809 [Cordyceps javanica]
TQW05688.1	MQVTRCWKAETARSSCQQAWSRSRPPNTTGISLARRIVLTAWDNKQYSSGAARGASYQLCATHRDGTLAKRKERTALSVLPQFCMNILSERDDGYGDWHFLALLGRATSTAALSELPDNNVSSYSVITMPMGKRVQDCGPDPRLLTLADHRQQVTSQVPIADRRARGVVGSNGPMRRRSWTTDNTAAAAAAAVAPAPIRKPEQPQRNGQDSLGRRATQASSRWRRLRLQTWSGFRAVGTGHLSPAILETAIWRGAKAG	hypothetical protein IF2G_06810 [Cordyceps javanica]
TQW05689.1	MTKTGRAIIPCTHIVAGQAEGLVDILATLYFLLLCDQFILLILYPTALPKEQKKPGLGPAKSPSRPAHGHLPFLIHVVVDREMLSVPSNTPVAEPHVEGRGAQGCTKGMGRLPPHPRREKVAK	hypothetical protein IF2G_06811 [Cordyceps javanica]
TQW05696.1	MRMRKGVAPRFMDQMSSMIHYKGCIATDLIGQIRLNGLVAVAPFIEQDKAKKNHIEENLSRRVGAMISEDESCDGRVTCWKCA	hypothetical protein IF2G_06818 [Cordyceps javanica]
TQW05703.1	MSASLLGQRSACPERNFVAGPNLLTGRHITSSLFEITSSSLRHWSHEQQISRRRASQSLACGHFGLASLGHKPGVVAEPKVPAGFQFGPKC	hypothetical protein IF2G_06825 [Cordyceps javanica]
TQW05719.1	MFLSPVIGCSVLAISWPNWQRLAINHQSRCSRGNAPPSWFPLGRVLDDGQADSEAC	hypothetical protein IF2G_06841 [Cordyceps javanica]
TQW05724.1	MPIARGGGCSATRHLSGSPSSYREYTKIGGVFATARQSSSVFAKVRHRPRGLFYGLSCLLRRDQVPAYKARGRPLPSSESWLRIRVAEE	hypothetical protein IF2G_06846 [Cordyceps javanica]
TQW05737.1	MKQTLGSVELLPRGVSSSNAMACCSRGPCPQAATATAILHLVGGLPSCQRKKKKRQGTDGGGGNGVDLVRCRGRRLGDARISNNTSFAPIIIYRVSATRTRIKALAPGFQCRRLPNRHSPWSSLFPSCSAPQCLADVCQCTACHDVPPPFPCKLVPLGTLRLEPKSQRPVPGLGRH	hypothetical protein IF2G_06859 [Cordyceps javanica]
TQW05752.1	MIASHTLGMEEEVLPSERYTGGVKGKLHCTEYRLLYRTQALVTVAGLVLQLGRSSVRRIPKKRLLLHLVTQGTSKHDVAFCMARRVCL	hypothetical protein IF2G_06874 [Cordyceps javanica]
TQW05758.1	MPLKSPHRILPLTTQTRDAFLYRRTDRPLLTPKPVVSLPSATLAAPYSHSHSRSHSHPHFLTKSTTKYGVPIITTAGKPQSAAPMPRIHGTYGVQVPRLPTLPSLVRSEQAAYMLPFPVPTSLWTVYGGLPFWDIKVPPPSIIRDLASIPSSSHPKF	hypothetical protein IF2G_06880 [Cordyceps javanica]
TQW05784.1	MEGFIDTLATAHSSALRWSGLVMQPGRRRDHNGTVAYFQRDCRILSTGLSHTFNGTVAYFQRDCRILSTGLSHTSLANRPFHTTGSHFTPVHRPLFFINDTLKAVIAFEFFDTDPLQRYIKE	hypothetical protein IF2G_06906 [Cordyceps javanica]
TQW05791.1	MSSGSCLMSLSVVAPTHPHMQQKTADGLPETEQLLISSLPMMIFIFSTGQDTHLAQWLSPPLLHSLSPYSLCAAHRLHSLYTCISVQLPILAPP	hypothetical protein IF2G_06913 [Cordyceps javanica]
TQW05793.1	MDECNAIGSVVSDLGGEGIKRIDEAEYEAFPEKRNTERRNEEEKKELQMLDTKGLAGEKSWGKWVGGWERGGKKKKKKVHAGLLRMMYW	hypothetical protein IF2G_06915 [Cordyceps javanica]
TQW05805.1	MDRSEQDGQEHRSRRGRRRGGTVSRGGGENNNNNNNNKTRHDYGSIHTRTHTHTHTRTRGE	hypothetical protein IF2G_06927 [Cordyceps javanica]
TQW05806.1	MRWSTGSSNIAPQARFLSRRPYLLGNDESKQQCLRGRGFQEKGGLFATTGRREDLSKGGKLSMVRTGRYVRNAKKYAQGAEQVSSSEEQDGHEKELAQPIKKRAHSNRPARPGPSNPLGFVAGRVLGRSGCMTGERRVYVENADEAAQRRRARQAGEQTTDRRWC	hypothetical protein IF2G_06928 [Cordyceps javanica]
TQW05815.1	MALSRYLPPLIGCLPRTILVSAGIVPPSCRLYFPSSLFFFIILITQYYFFHSPFLTFVRLGRLLEWLPFPPGLSYCFITLSPCNHFDSSLPPCDTRHRWQARAKSLPSQAKKGLIAPRPTHAHTLLFPAAMSCYCCFVGTRHAE	hypothetical protein IF2G_06937 [Cordyceps javanica]
TQW05821.1	MRSIRSSRSRRAARCLRGLMGSESKDDPRAIANVLRVFKASKTKRALLVTNQAQQWHHHDSSCAEKADPRCEPLNEEG	hypothetical protein IF2G_06943 [Cordyceps javanica]
TQW05826.1	MVRVYGSQRVGNSRDLIMFGSVLLRLLEICYNFVGTLHFRKSAIQEKENNATSFTNTLHQLWTISRPISPIVVLYSFACW	hypothetical protein IF2G_06948 [Cordyceps javanica]
TQW05853.1	MMVLPVCRQRARAGNQTMVHDCSTIYKYDVVWSSFALPLTFLYLGRHHSAVRRDRGKTLSMHLGLRTELMPAHFQVHKSSIINFQLSHDLRLLLLAPTGPAVHQLIVSHGLLNCRVGSQWSSVIRRVMSGNHGVRLVKALTYVKDGK	hypothetical protein IF2G_06975 [Cordyceps javanica]
TQW05854.1	MFRQKVKSEGGRDRSVSRASGVAPYPGFMLLIAGPAADCQRHPVEIKAASLNICGMASVGKTEPAGVENASGIRVSFSQSYYLVSSPLSYSILVGISERHPHYNTGP	hypothetical protein IF2G_06976 [Cordyceps javanica]
TQW05855.1	MASLTLRMNIRTKTLVLIQISQVLRAVFWFDTNIRKDFKGDALTREALNNLLHRIKLLHCAIGDHGDAPSAKIFEVHPDLLRDTGAEADRGGRHLKSVLLERLCLRGRCIAAVARVGASGQHCRLGLVVARVGVARTGRWVCILDGTEEAARTYSRLGSGNENIQVSLRGVL	hypothetical protein IF2G_06977 [Cordyceps javanica]
TQW05871.1	MTRSCQISATPLHSHAVCPMPPLSRNPGCCMQSLDQCNICHNCCGQMCVYFVCSGGSLFPHPTIPSPLLARPQMAQRFLQATKPPSR	hypothetical protein IF2G_06993 [Cordyceps javanica]
TQW05872.1	MACSSDLARAVLGRHFGPALGGRSAAAGFRANLDVKRKKDKKKAWPKLQFSPSGDPRQDPCHERSSALPPSSYQADGHRLFLICHLTKELMPSEKGQEEYTVAELRPQPICFLLAHLFWGGDLMGPNFGMPSHATQGPGSRKDASCPRPALELRREMLLLALRVAALFIMAE	hypothetical protein IF2G_06994 [Cordyceps javanica]
TQW05873.1	MNTGLQAAQDTLHPCGLPVYYQGASKQIMCVKKRAGQGGQGGAIVFGGFGGKGKEERTRAACTNGAFSCSHKRAKAESKCSFSPQEEEAGHEQGKQGKLGPRIPLLFFGRSMHTPPPLWCLSRRALPVLVVFLVVNCDGGWEPCRVGSCDTQSWGLVEGPKCRMNRSTASPPHITSLVSRLVILVLTIQYLRLFCTILACAWVLPLRSNKAVRRQRPGEKSRRRDPWRNQ	hypothetical protein IF2G_06995 [Cordyceps javanica]
TQW05875.1	MHTAENKSADETLRLYGRLHSIHFARHVRDRGQTSKEGVQNSVGSQLAILADDCGLTIRLAFSLCLRPSLPSVFFLAVSIGKGDLEQDVREPPGGTLRDPAPFPLS	hypothetical protein IF2G_06997 [Cordyceps javanica]
TQW05876.1	MYSRTGHKEVRDAKKGRPHYLIPSLPLMLSCCGKRSFLVGRLSEKTRLQKRQGQGQKK	hypothetical protein IF2G_06998 [Cordyceps javanica]
TQW05886.1	MQIPVLSNQFVLSNRGCEGWIDRCSVVSIVCCALDIWILLRKHNAATINHTIEIISPVVTKGTCVITYI	hypothetical protein IF2G_07008 [Cordyceps javanica]
TQW05887.1	MSLKPTPSFFTTCSMSESPTPDLQTHISCFRTPRARCSGACGLPLRARVVRRLRRFGVQPLAQAATRMRVNPPGAVSADTAGLGKWEIRSTGWVGCEVRHDQVSGRDPSVLVLKERLWVEPRRHYADVDADTSANQRMRRLLCARRPDQTVIGSLREGWIFAIASQVTEANAFEDSIANLRGIVDIPAAFLCPRLRYGVGPRLPVRV	hypothetical protein IF2G_07009 [Cordyceps javanica]
TQW05893.1	MRRRSSLTSDLMLQNSYSRKRCRWHGAELGVLDIFLGRLVLNWRGPRHLLTNHG	hypothetical protein IF2G_07015 [Cordyceps javanica]
TQW05903.1	MMHLKGPENENKRAGKQWFGGNVTNCVVVSIILGALFTIVDFLRVLPFQRLSDMHGSFITFSDWAFGISLGPSTRCTASMSLIKCISRKTA	hypothetical protein IF2G_06185 [Cordyceps javanica]
TQW05917.1	MSSALLSTACSCALCWVCPCQFPGRCACLNRGRAHVLAGAAKSCSNTHAEMHLFAFS	hypothetical protein IF2G_06199 [Cordyceps javanica]
TQW05944.1	MTDTVGPLPESANRPLPNNEGALRSSFDEIALLGKTVDMCSTVTYSSPAALISTLIRNTSNNATGCHPQQVSISSNLDAHKSHYKGLTALLAKFCPLLAPQATEIACWNPPGMSEFD	hypothetical protein IF2G_06226 [Cordyceps javanica]
TQW05947.1	MGDIEWTFPFGDFPWLLSHVVAMSGSYRVFDYWHLCVFHVKCVRRSAAHQPVDEMFIFTKGENSKDLTYPQRLTLAV	hypothetical protein IF2G_06229 [Cordyceps javanica]
TQW05948.1	MISESQTKERGAVAKRHDGSCLGRRHGCRSVSIALKKKFKKQVGQSTATDWRGCAREGGRAARGSPLITDGGDVWTGEEVDGGLPLEPLRGPNKKPSVHQTVNAVAKCLNAGHREK	hypothetical protein IF2G_06230 [Cordyceps javanica]
TQW05949.1	MARSLNRCFSYRLDAAFLNALDFVACACPNQDPEGIDSVMTLRIRTGVFLDMAIHCAVMSFFARRRGRAEMTTPLRVMAVVPVRVYIRSLLGILGCIYLIPGAGDA	hypothetical protein IF2G_06231 [Cordyceps javanica]
TQW05951.1	MDCISREGRQNGRRGLTEWYRHQSRMRTQKIVDVGGRGNVLLPKLCTLKMRYGHNVDCRKQLGGRSFFRSKDLVFQHAA	hypothetical protein IF2G_06233 [Cordyceps javanica]
TQW05954.1	MTACSLSRHPAASSCQQPAVSSPLYVAATCQSRKAQPIGLTGTAEYEAILAPLSVVKSLLFFEQGGLNV	hypothetical protein IF2G_06236 [Cordyceps javanica]
TQW05957.1	MLYRPEEYYGELSVVRGQIVVSGQYARLIWWTSMVYSVWWNLGRSGKSRLPGIRSQHPEYISIGVIRYESTATAKQTRRLLIDSALRSVWLVAVEGCQSCVAETGTAGGAATTRTGVSAPGCGPAKALTEEAVGFFGVHSASDASCMRPLISISCARSRDTLMRIGILSCILVMSEAAMAVLGDRCVCAVSAS	hypothetical protein IF2G_06239 [Cordyceps javanica]
TQW05959.1	MLATLWVLVHASKHEPRLPQKQRCRRSQACKPSLQQRCNQATRSSLHCLHCPKLLTVSRDGANLPIDPFSPSHGLDAVGGFSDGPRSRLPGGVFLSHLPDQLQSLLGNLSSSS	hypothetical protein IF2G_06241 [Cordyceps javanica]
TQW05962.1	MEVQRSFHFELASRSLSARSTLPAACEAAGEAQRCGLDRGAPRFSGHAERLHPTQRYASELKGRASKTSVMCLKLYFVRTACFSFFFLASSVGWRVRFDDKLHPKAVFVGELADRDHRRCLLTPSCLLSKDDFLSKGRIIAHCPKSQLIVYSSASSVRYSCTE	hypothetical protein IF2G_06244 [Cordyceps javanica]
TQW05966.1	MQIETRLASQLLLLSYIFFLMMLSTTNNNHEGKQTRQVGKKKKMYRISMARTGVGTATIYPVAQQPPT	insulin-resistance promoting peptide in skeletal muscle domain-containing protein [Cordyceps javanica]
TQW05972.1	MLTTSTRVCVSGRAGRGGSGGGGLPWTSAGSAACPSHDDLLTGVQQLTVESSTHPVRKASPTP	hypothetical protein IF2G_06255 [Cordyceps javanica]
TQW05980.1	MVRTRVDGASRASTNPLESTAPRTKLSGWRQTGTRLSGQDTCRVQLWISVRDEKRSRIWDKCLACQSALAPVPPFYAIPSAGHACPPNRLLVLALVLGRSCQCRSGEACPRKPPTSFSTMRASGQRSRQCASWTNHRVSGRRTKPQWPVTTWATVTEHL	hypothetical protein IF2G_06263 [Cordyceps javanica]
TQW05990.1	MLWCLGKYRCPRNYRVPRLLEIATKGKPLTWSQTLRHNKTMITRAQKVV	hypothetical protein IF2G_06273 [Cordyceps javanica]
TQW05994.1	MRKQRIRRELAGCPGPSFAQDDELGVEPVRETIAEQSRWVRQPMVIESLVGVGVDDGWEGGAARTKLAGGRRAGHRMLGRRRSGSCCGLPCPEYSVYCHVPTYLYCILSRRTTHKQAGFL	hypothetical protein IF2G_06277 [Cordyceps javanica]
TQW06000.1	MLGVDEEGYKPPFYWIPLAGPVGRKGLPGRWGWERKFLSAKLSQTRSVAMEEVSWKGYGSSFSRRTYHLPGIDTLWKRGSYGDRHSLPSTPGRGPITTK	hypothetical protein IF2G_06283 [Cordyceps javanica]
TQW06003.1	MFHGVMPNQPCRALPTTILGHATPGRHLSSPARQALEASSASCVIRGLLSRGIAGWLASRGGGGRGGGGGEAALGTALESESEWLRIDLIGPLPVRLSQSNFSLPAQPSAY	hypothetical protein IF2G_06286 [Cordyceps javanica]
TQW06004.1	MSSCRRFQASIVSTGRADRPAAVGSGRMCSSRSLSESGAVLPLLSPSPPSLKQRRRRDETRRDAAYRQAARRTPRRGKTHTRRDAQVNVLDSLRSTSRSALVVMRVLGARRPRPRPSGTGRQVDSVMYSQCNSCGYGVAKWRI	hypothetical protein IF2G_06287 [Cordyceps javanica]
TQW06031.1	MERLHAAGRPKFTHLLAHSVRISFVGISPLILMSNQISRPLADVFDPHANLGVARAPQKPRSRLAHNNHPLGAWTGTSEHSAIGIFATAALQLLKPSTDLSSYLLNCLGLDCYSPNNKVVNICAPTANKTATLLQHLVSPTPSDLQLNSSPATTTLVWLAARSRLQSTFGPQAFALGRPLQLFSYPQPPMAQFAWQGFPERKFPAL	hypothetical protein IF2G_06314 [Cordyceps javanica]
TQW06040.1	MGSSIRPLFIGCLSPAASYLSTNTPMRLCTKETKQSLSSYDVMPQKEKPRRCTALSLAHQLPCCCRNHAGRPPTCSTVKVSPGDIASDE	hypothetical protein IF2G_06323 [Cordyceps javanica]
TQW06041.1	MGESALLGWQARRSREDEAQFRHRINGICSAPEPRCVILPAKLRRAGHFEVDCAPGRLVHTLRVFCKLTSD	hypothetical protein IF2G_06324 [Cordyceps javanica]
TQW06049.1	MRTKSASVNRGSLLFIFWKMVSKSILDSRLVLNRFFCILVVLFFLVYQYISRVGSSLLTEYRQAEAYYGLWSRQTTPHARLSIRFAPANKLNRSNLASPVQTVNFPSAFPFKAPLPPHLQNGHPCLSLKARIS	hypothetical protein IF2G_06332 [Cordyceps javanica]
TQW06068.1	MSQVSPVVRAAQCVSWIDATTRATVGGATRNECRGMTRRAKRGHAFKSIHCFISIVVSDPSVSGACLRSESSGLEGYEVKGRTLFFDLLRGSGFQRRFRRKLVLHSRHFGSNQAKNENGS	hypothetical protein IF2G_06351 [Cordyceps javanica]
TQW06069.1	MLTRRCKLVANFSLSVPSTNLPVLCIPNPPPPTYYLPQTQLPASDELAACP	hypothetical protein IF2G_06352 [Cordyceps javanica]
TQW06072.1	MACPLILASQTRSYCHLARHRHTHRNRLVLGTMMLTTEDGDRAQSRRCRGIKVQQGRGDVPVYFRRLSCRGTDLLLRRVSETWSNTFGLIFSDERLTNLPVKIQPQNYGGIP	hypothetical protein IF2G_06355 [Cordyceps javanica]
TQW06073.1	MRRESALEKRERESSSHWEARPTATTSRPGFSAASRASNGRTDPICHIVEGVPTATHRCDGVCDAVGWHAILPRPQGEGGGEPSYEIATTGHGLLTS	hypothetical protein IF2G_06356 [Cordyceps javanica]
TQW06074.1	MAVNRFASAVGKVSRKLNVVTLASSKQSWDIWAVCYDWCLATHRHLYAFLALSPNFGPSHVSCMHAQTTNIKSSSTESMTL	hypothetical protein IF2G_06357 [Cordyceps javanica]
TQW06077.1	MYEYSVLKYGASTFWAGRFRYKSIVAHGHSSQKVQRAIILSLVHPYSPVLPCPVLPRAAAPPGLLAPLQRGKDLGWLKAGLVNLPRPPTSWSDQVLASATPQIRVRRLPAVAPA	hypothetical protein IF2G_06360 [Cordyceps javanica]
TQW06081.1	MPMPCALPDAVAKLGYPANCQAKEPASHQTRRYEPRLLSLPQQDTALVRSRQKDASPPRLSEHDSTENGCFNQSHDAICRRHRPSPILPEEARFYLITSPAPKLIVDSYYGCSASKTSLILAYY	hypothetical protein IF2G_06364 [Cordyceps javanica]
TQW06085.1	MDRARCRVYRRQLETRPPPASSSLPQAPVPPGRRGRIEPAGENPEPAFILAMDAHPVVAFSLMCKGSRWQNDVLVWGGWQMEPCGETCIEGPVQ	hypothetical protein IF2G_06368 [Cordyceps javanica]
TQW06087.1	MRSMIEGAVHLSAHAPGIGKSPSCCTSEQKASIVNNMYPSSAQSQLHTFRNNTRLLIRSQAALPSLLCAIVPARQTTP	hypothetical protein IF2G_06370 [Cordyceps javanica]
TQW06110.1	MRNSHLLISWNMKRGVWSFRWSNSASGRSTGVLSSSGWTLGDFVLQLSAANFESVQTISNYRLLCGRCGRCGPISRGLLRV	hypothetical protein IF2G_06393 [Cordyceps javanica]
TQW06127.1	MISSDRKSRRRRDARPFFVLPRRIEACVSVGRYVWGGELECCCLQLVRWGVAMPDLQRTKGICGQEREKRRESVGKRI	hypothetical protein IF2G_06410 [Cordyceps javanica]
TQW06129.1	MPNGKRSDRTKPAGACVTCKSAPSRGGFSHMLAQSDEVVKFPSCSLPFLTGVHGKSFLPQFGASIFAALLIQAKGSGRQVAAQPQSRDTGTVAFSA	hypothetical protein IF2G_06412 [Cordyceps javanica]
TQW06146.1	MSVELRPMTLLGPEAGRHATSSTALARQGHPPGQLSQHQRKDDSPAATRPPSLVDEEGDGGDERHEFSLPPTDSGKDAWMFLLSSFMMEAFVWGMRVTTHKRR	hypothetical protein IF2G_06429 [Cordyceps javanica]
TQW06150.1	MSPSSIFVACAVALFNASAIMAAPGMLWLSSSRSVAALAACHMALPRNPPLIEPASIDTNTIMGLA	hypothetical protein IF2G_06433 [Cordyceps javanica]
TQW06152.1	MAPSIYLYVLIIAQTMPGGFKRKPSRTLFLFASACKTQSCSMPWKHVYPHSKQMPPGAQIIRFKPNVKGSTAALQPA	hypothetical protein IF2G_06435 [Cordyceps javanica]
TQW06156.1	MSDQGLNSIRKTVTCADDIPIIQAPPIRHIFDNEPHEHSQVAPDADFGFRRFICKSTSEQFKFPVSNAGSNGSSPLAAVRSIFSSDQMSKAVYCSHKTAHVWS	hypothetical protein IF2G_06439 [Cordyceps javanica]
TQW06158.1	MWMLSRNSFGTWALSRCGRAGGIGNGRLRGQAQDNGTAPVSAQPTITMMESMLILDRDLRKTDWLSCANQSLAGAHHRPTSEVLFSLGWIWQADAWPAERFSSTRGAG	hypothetical protein IF2G_06441 [Cordyceps javanica]
TQW06163.1	MRPAPCRGRGCPSMRTEFADFMMPVLCRCLSAYSGSGSALASEVYTVLSILGTAKGGLSSQQRIDTLFLFFLFCNGGTAQWLPVWLASKTELPAT	hypothetical protein IF2G_06446 [Cordyceps javanica]
TQW06164.1	METRVSVTPLTIIQFYDMNRRHHVVSPWGSRINSSFAAASLARARVETSCFGSRCFTELL	hypothetical protein IF2G_06447 [Cordyceps javanica]
TQW06165.1	MGIDRRYRRPCYFMMGKWLRLSLLLLLLLLLLLLHDVASASRSLPERAWHQDKEPSRQSNPSIIKAPWIDLAAGSTWLAPRAWPRPAYPADGQLDYLVACFQGRKGEKAQENFSGWLCAKHNRLMGPGSC	hypothetical protein IF2G_06448 [Cordyceps javanica]
TQW06166.1	MEKRREEEAEKEDKEEGGGGGGGERRARRRRKRKKSTSTRGCGIRRVDKQIIISMDGGGDGELQTGGSLGLKARTEGEQAQNGGAAKDPLH	hypothetical protein IF2G_06449 [Cordyceps javanica]
TQW06177.1	MISSGLVDGHLLLNADGVLRVTAKPVLLPLFRLAPPTCSLLKHSSHSQWFTQPCRLALGSKERSIHALLHFPWALSVTFHKVYAEVVSQPVYHPSTWPTQGLLKVPQSVHTSTVLEFMSFWKQFERCF	hypothetical protein IF2G_06460 [Cordyceps javanica]
TQW06183.1	MNYTNEIKARLRRDGNGRIFIRAPFRRYLAEGGVRGTSKVKATVLMSGPSR	hypothetical protein IF2G_06466 [Cordyceps javanica]
TQW06198.1	MWPCDGTHPPTHIAVVRVGASSIEMYRCTYMARQIMDGGALDPSPPPDARGSRAETLYMTDWTRLHCPFVNVASSKRKGKKRVPAIRETTAERQTGKQKRAVSMQFCPCRHDTTTTIIIIIHH	hypothetical protein IF2G_06481 [Cordyceps javanica]
TQW06199.1	MPCSICDGRKQVHKTFLSIKGACRVAGYLATCQVYSSVHSSVPSIYPPAPPSFVRRPVSCHACASGYSHPDKRSIGHDSWVPGRVISLVTANGPWGKTAAAWCALPHQNS	hypothetical protein IF2G_06482 [Cordyceps javanica]
TQW06200.1	MALSRWFVSSIPISRLIYPALRESESSKIQTTCSKVKLLRLRVTTPQDRFSCDIFRKRIPGVTQRHAARPLQPARRLQSQASSTCFRKSNYVQGLFIRPHEVPRAKDVALISRQTSQPDLDQAFRVGQRNIFGRRAY	hypothetical protein IF2G_06483 [Cordyceps javanica]
TQW06226.1	MPNEHSTFGTAHGPSLRAAAVSPGNPVLMRLGSSSTVAVHLTSLRTWLPDIAGASAGHIVT	hypothetical protein IF2G_06509 [Cordyceps javanica]
TQW06245.1	MRDGRQDKASRNDTSSITMFEYKILGMAGGRKVSCTRPSRTTAESQVQRTLARRDQVQIVEDGPFKLIHDCQRKARLQQSLLEAAKTLWKMQFIDNIGRRCWRTRWIFHRAAANHDDAHD	hypothetical protein IF2G_06528 [Cordyceps javanica]
TQW06247.1	MRHHGTYERLNESNKSSKSSNVNKLRPQVVSPGVAASLGGRTRRGSHLLAGPSATRDSQDNGQTRDFYRKPRTRPSHSATWHSSSTLSHSSCSSGRDGPSSAAHSLGSGSEQDISLPGSSTQYLSHANNDQPESSPKVDYSFREADLFYGVVPDEASTRDTPDSAGACNTSSEPAATSETGTGAESRNQTQWWRPKFSTTWTRKFPLLVQPAPKEEGFQVVRPGNAAFRMARMKQAQAQAQAMHSDHGEGQDSHAPSDTLSSDGVSDESVSRDTR	hypothetical protein IF2G_06530 [Cordyceps javanica]
TQW06251.1	MTCIDERQAKGLWVNKAMTWVAFSWPHSSHLIKRPEFCTQRPCNFLVIITGGHSKLVGCMKPKRLVCCATAPPIVQCRSS	hypothetical protein IF2G_06534 [Cordyceps javanica]
TQW06302.1	MGLFGVAWPCHPLDSTERRQYRSWSETAHRVTNITRMASAPFDRFLRPFSSRPQDPLKASVVVMRVWLLYKETSKCRKRQPKCPDRLLDNSEACSLDECLDFDGNLHLEFCFLKHYI	hypothetical protein IF2G_06585 [Cordyceps javanica]
TQW06314.1	MKRQQGPFNKPSFHDHLFIQVYMCNQLSSRATEQQLLFFLANLARPKQEGLKNLLTTVACNSYSVPVRTTAREYASMPNGRCDTFQSGYPNLGRPSPQEGLELFFQEKRNTTPHTSAY	hypothetical protein IF2G_05736 [Cordyceps javanica]
TQW06323.1	MARPSIMEPFCVALSKSLYSLCSFNSADASLAVSLASQPAAHAVRDWSPSQSAVLGPYVSRGLITAELVSVITCDTVPRIIAYQASANLPHIKGPVAPSPTKNPMQSCP	hypothetical protein IF2G_05745 [Cordyceps javanica]
TQW06363.1	MEPHCRSGQPTTGVRRLQGYNSPPDSLIHALGTIHEPGNADLGARGAIDFWVPSPAEPVYDMMAQTKPTRKDFGCPSDVAILTEP	hypothetical protein IF2G_05785 [Cordyceps javanica]
TQW06368.1	MVGFVMWQGMPVGNRNIYEDFHKAIVSFCQLLILQTTKARLETSAINHAYQIHFRQHICITSLERCQVKLLPGIIAINQLTPAFGRASDIHSNSSLHAFTTRQKPSIPSESIVEPNTETANEI	hypothetical protein IF2G_05790 [Cordyceps javanica]
TQW06375.1	MRARGARISLAVFEASICPKGGGRGEGLLIFAEGAPPVIEEEDRRARNAQIAKKNKQKQAQGTSSHHVLPLGINKSIPSETWLRTGQCDQHSTRVCSQKQGRRAVNRALIILILSLRHGDQFCGIGIAHKKSRQ	hypothetical protein IF2G_05797 [Cordyceps javanica]
TQW06379.1	MGKNSLSPGCQAKNLTCRSGSWTTINSINSGRSGTLYIRPMVSGHTARLGPTDRILDWPSPGTTLFP	hypothetical protein IF2G_05801 [Cordyceps javanica]
TQW06383.1	MCIGGNFDDGKVFKSQNRLAGSVPVGDSRTAGLQSAYVTGGPHGLPFAVQGHQIQGTAIIHNNIIALRFLLSSSSSLGTKECWLRIKCTLTVRQPSLPLRDH	hypothetical protein IF2G_05805 [Cordyceps javanica]
TQW06388.1	MMSCSEICGVNAASLGSFILSTSQSSSRILIHLLSNLGGCLRFFISSALANLYPGVVVGYWGMRPVPEETAGYAGLENGFKERGRARWVNYGDGLLPLYSRSKIGAFLPRGMDIPSYSCFAAASSPXRTRLCCRPGCWPLRSTGETTGKAGLLSPAMRVLRELICGVNAASLGSFILSTSQSSSRILIHLLSNLGGCLRFFISSALANLYPGVVVGYWGMRPVPEETAGYAGLENGFKERGRARWVNYGDGLLPLYSRSKIGAFLPRGMDIPSYSCFAAASSPLNPPPPLSLLLLAQRRVPAYPPAALPAVLPVPTAAPWRVDPSSILPVLAKGVAEFGQKEWHVDVPGFTVFGKSGQQLVEAITGPRGRVCAVGCGTEYRG	hypothetical protein IF2G_05810 [Cordyceps javanica]
TQW06389.1	MGCCPASPRRICRMPRVVTSLRLLAPFCKRLQPSRVATSVPLATIESFFSPLAEDVDADLSGKCLLPGAEGAGEFPRQDGYQYTISFSAKFLLRSLAESRPIAASRSIMNRGPQLRLTSLAETTDRSLDSEAGPPGYRNRAGGDIEVTAPVERTRPAGSETFQL	hypothetical protein IF2G_05811 [Cordyceps javanica]
TQW06390.1	MSSTVSGCKSVGHAREWFQTGHSETVVANNNHGTGAEGPTLERWRGYVYVGEMRSVCCHDVSEPARDGTKPYGHDDGLVPTAWGALPRDWVMSCALEFGGMENTWLDAGGSKRSSPGVSRGDRVRVVLERLGPSASICC	hypothetical protein IF2G_05812 [Cordyceps javanica]
TQW06400.1	MQTRRYSFNCAPGYCARGNYVSTIVSEVAKSRVVRTTATNGETRSSGNVYVKNNSAFEGKHIFDELLQLRRQLH	hypothetical protein IF2G_05822 [Cordyceps javanica]
TQW06408.1	MLVRMTHELCSVVFILQRVVVTKVMKDCIKSSFCFVSNFLCKWESGRRVDDVLQCITMAAVSGRHDCSDSSFSRASSMKEDVQISRVPSR	hypothetical protein IF2G_05830 [Cordyceps javanica]
TQW06415.1	MTAYRWAVDKTWVLHHIIRVSILRTAKFARHDQRSCHFNYAVARMEHWLFREPGDVPFAAVFQPATGVMIQSCLQASTVGNSPVGYLP	hypothetical protein IF2G_05837 [Cordyceps javanica]
TQW06420.1	MMGVIKYNSPRSARSQGLAIAGLPWRVSSEKQTAGGQAAQHWARPSMPAPLESLFVGCHQSTWRPLFCIVPVRLLIVCLVNSPLLAANGHPPSQHVSPCRLQVPRTQELADKVPKCPLKVTWSTTNSANLLSKTPLDSQLNTNLGKQASISGPPAVSAARRPTVSNGTCHACGFASVLSVSLPLYLCLCLCQSHPFYVSFLFISSGRLPFLPLPLLTPLVYYFLL	hypothetical protein IF2G_05842 [Cordyceps javanica]
TQW06422.1	MTSSSPIIIRYTTGVLFGLGWAWLVAMITHCSFQEQVVRRRQLLRQTLRAIQADKRYHY	hypothetical protein IF2G_05844 [Cordyceps javanica]
TQW06423.1	MDRSSIIKHFVCIRTTAMKMTRFFRGILTWYSPFANALFIQYPTIARHRHCADILQGHRLKYLITSASRARTVPESQPPTCYLAPLRGISPTSSPLCPHQI	hypothetical protein IF2G_05845 [Cordyceps javanica]
TQW06428.1	MTEGLLEGRGEKKKGLQGLTIAGYGGRACRWLAGREDANEGRGWVGGKWIVPKTTELLARPALVGTERAKKCPNLVLCRTNNANVNFQSGNWKRYRRKKLGWQVGRLSGIMRYYWMLDIGQGGRGGGGSGGLTLTLD	hypothetical protein IF2G_05850 [Cordyceps javanica]
TQW06431.1	MRSKRLRALPRYATTVGTARTTYPLTCPWLAGRPDAIHNAGLLLVGVPKEPTSPSGTPRLTWRWYKYQDVNPNRWTVARLDDVLFSCQASARHNILDPDPGEFIALLDRGPVVHAALFFIWLAWRLRQIEPPDATF	hypothetical protein IF2G_05853 [Cordyceps javanica]
TQW06444.1	MLHYHTLTITQTIRLSAYPTIYPTIRPVVNFFTPCPPSLSTSYPCKRCPSHKLVQPQWPHFEQFQSMFFIQCRHRPFASPARVYYTLLTTTKYDSLIPKMCIKMGKMGKMGKMGKMGGSGAANVRDFSTSHEKRPNQTMEREREREMEKRARDCFLRHCPSRPHSYFAVPAYWNGTRAPLQGGEPT	hypothetical protein IF2G_05866 [Cordyceps javanica]
TQW06457.1	MPPFTFHTLQFRKPHARGQCMFPFPAINHNAGSLAPKPIRALKHIDIPPYPHASLPLAPMTPPFPPCRFAHHETARPSPPRSLYPLGTHQPIGSLSKYPPPGWDTIFNRYGCSCTCS	hypothetical protein IF2G_05879 [Cordyceps javanica]
TQW06459.1	MEEDDSQGVKCVSACEVDNDSRLHLRPPILFVSSKHEDFQKRPDSGPKQIECRRLFREPADTGG	hypothetical protein IF2G_05881 [Cordyceps javanica]
TQW06463.1	MYSCTFLLASLSVVVDRVLHGLASSAAGPFKYKGAAGFPSKRSSLKKRHFIAARIPILLNTSLAGSNGH	hypothetical protein IF2G_05885 [Cordyceps javanica]
TQW06472.1	MLSYGVICSLTLFRNHGAWRPRVRPPHLRSGASPSWIRIWPGRINSAAWTTWQHYISSISAPVSFDDSL	hypothetical protein IF2G_05894 [Cordyceps javanica]
TQW06474.1	MGILVHDNGRTQNAPSFLVLFSFSSSCCTLFPATLLLLLLLIGQDYCWARATAHGRGGWERGVSLPPFLFLYRQVHFGSFLFASSPL	hypothetical protein IF2G_05896 [Cordyceps javanica]
TQW06492.1	MVYLHRIFGTASETISSGDGSMQQKVYARVASEGVKKKHLSLTMNLGIEADVASGMALHSSLQWPAGQAMRS	hypothetical protein IF2G_05914 [Cordyceps javanica]
TQW06503.1	MGFSCVLGYLHGEHLQWQKGRAVSRNGHSTPYSASIRTQRRETRSSASAGQPGARCQVIGKQSGGVDGWMDSVSVSTE	hypothetical protein IF2G_05925 [Cordyceps javanica]
TQW06533.1	MQRSEKGLAGDFVLLGSQRSDSMTQRKVCMNSRFFSHTDAASARLDSVLTLQGSRMWLLIVDRVFSRHGLQVWCCTIGTVSPAASETCYQLCLPLSFFFGVVQVFLGVRGGSFCKGALARNNLVKCRTRCGVGGQVKMWTSQKRCLK	hypothetical protein IF2G_05955 [Cordyceps javanica]
TQW06550.1	MAWLEEEKEDSKQASRLKQGEVGRMDEEARRTIQRGASDWPKGVYCLGQACGLGTVRAKNCWGSHPDALGSAVPWWGQVQGQSGNLHERVRYRPSPAEKSFFFPVLAPDQARQKSTSARQILDSPAHHQRRTHRWREDGYIELS	hypothetical protein IF2G_05972 [Cordyceps javanica]
TQW06557.1	MLIVGMCIDGQLATLGLVPATRPFSHSATTQHCAAKSFEPWSWQCTKYLPSLAISQPVRYSRVPHSNESLAARQQATCKPTYIARCEPAYALGVACCFKCSIPSWPAAKILVCVRPTFVGGWIAVPIITVQRGWLPVQDAVMHGGIDEQGGYMPLLPLVHEPFRSYW	hypothetical protein IF2G_05979 [Cordyceps javanica]
TQW06562.1	MSRQGIIESARKSVTSNCDFIDPIFACFIVVLVRELFSAGGGSSHHLVGFKRASARNIDTELRN	hypothetical protein IF2G_05984 [Cordyceps javanica]
TQW06567.1	MITKSRHWEIAVLRRARTIREFAPAGVRSMCCKDEQPIQRLYGTETSSNNLGPMGFYLIQDPAYSAIAMEMIFLPRSNYEVQDGHATASWRETSLPQPTPRTVVSRDEVALKRTGSAPGKNDADSVGPDLRRSRSVP	hypothetical protein IF2G_05989 [Cordyceps javanica]
TQW06580.1	MSLATGSSLMDALIVAVTQIIARQAELSQPVRLPDKELRRKADQIVFPLSA	hypothetical protein IF2G_06002 [Cordyceps javanica]
TQW06582.1	MCALSQQGSTSLQGALLLTQLILGKQVSRCRKETMPQPILLNIINNCCRNQEYDGHYSVDISPLTRQETGTSSGGESVAGKPNLRTWATKVHTQQ	hypothetical protein IF2G_06004 [Cordyceps javanica]
TQW06585.1	MTVEKILGALVCTALLTILVDPRLSDLPVPRFGCNLITPDEAKLLSYNLAESTGYSPSTYLAAWLPTYVGVACSLSACRPIW	hypothetical protein IF2G_06007 [Cordyceps javanica]
TQW06596.1	MPPAGRCMSDAWGRPNRTGGIQHGQNPEHLSEIRGRIVQSKFLRPAMLHRVAPRPGRPVPIRRAAHYRLLCGHGAVPRPIIRRSTLQAIAAWADVCGDDPGACRSRRYGHPATRFSCEAYPLAGPAVDIDQQQW	hypothetical protein IF2G_06018 [Cordyceps javanica]
TQW06601.1	MPARTWNPEYYYSKDHGSRVLLLELCRCGADATRQHGAHASELVETASRPGVQDQSFSIYRAPKPGYGKCKATRSPAHPRPRLNCFCLVPVPCQCLQSGRPQGTEPTARRCPAVESKNTNIFPTTQ	hypothetical protein IF2G_06023 [Cordyceps javanica]
TQW06603.1	MVFEVYDWRRVNQVVGHVLSSASASCPKIFIESNVYDYGNLMVRNIPTKRSAISWVGTSHQRLWQHSRTTVARGQSIIHQLTLASSNTCSIA	hypothetical protein IF2G_06025 [Cordyceps javanica]
TQW06607.1	MLVHTRHWATLPTGHAPQSLDAAVDVALALHEAVMGVLDGLALAVQVGEGAGANLLRLVGEGLAGLEALGAAVEAVGAGEQLLALLEVDVGGAGGVVGVAGAEEGGAVRGEVGELAAAAVDVGLVVAEALVDLAAGRRGDVGLFEAHLADSSASSSARSAWLMAALRGSPESSGICSIFCDRSAWTSLSSASYELKSSEPASLSRGFDMAGDGSCGSQGGGGGGGDELGDAVWPAEATEKGDVAVGGRGAPRVGSIGTE	hypothetical protein IF2G_06029 [Cordyceps javanica]
TQW06640.1	MVAKKGGVGGRLPPFLASLVRSPTAPACHPEVNGTGRSFWKSEAVAAFRIDGCNHHYAERVSDNSPQAPSLHESPRSRHRTSKRTGRDTITSSRGDEQQPGQLATTLRKERKLMGASWCPLLLPRNEDAKSRSSWPCSVSSCVRLSR	hypothetical protein IF2G_06062 [Cordyceps javanica]
TQW06644.1	MLDTASVRYQSLTAPREIEFFFPRLPAASERRSRLRLPFAVSVLLFASLLFCRPRRSAPPEFIVRLHNKTESPFSSSSTTVILSISVRCPPSYSLPQLLLLDIPLHGPILAHHAASTAHETSLAGTPPARSQLPCLSRASLPSLKSQFNTPDIHSLPHQPEASPRATLRSGF	hypothetical protein IF2G_06066 [Cordyceps javanica]
TQW06655.1	MKTSPLPISLSYALCHGPSCAISHSWAVTFRFFSGAHSPSQHAAESGWNRRAIAGPARDTYLDEYFTRL	hypothetical protein IF2G_06077 [Cordyceps javanica]
TQW06662.1	MIRLPFFATELRQSEECAEEPWSSSKIEVRGANHESGLHHSHAMKASFSFVVLAPLYGGISRRLRYMTLGIRLSQQSNKREQQSKTIPKMSWQYGRAVAVISQYNCTLKNLFRKSADLPGVDAISTAFAGTDDPDVRRNFANTAEMS	hypothetical protein IF2G_06084 [Cordyceps javanica]
TQW06663.1	MAWGRPSDRDVVARGARILEFPNRHPSHGVAQTLMAAQPSRLDNDHAMHTTNACT	hypothetical protein IF2G_06085 [Cordyceps javanica]
TQW06686.1	MSVPSKLRQAQTPHSSSFFPRWCHNQTLHFLPSLFLPARLHSTSMLHGALTVMRNGMIPAPARPLRPNPAPCCFLHLSPATTTIFFPPCLIASRSGEM	hypothetical protein IF2G_06108 [Cordyceps javanica]
TQW06700.1	MKQKLTSALQEFEKMLTQNLWQTACNIGRGRGRAAYRVPRGGFDDMCVRAPSGQDSQLSAAKKSFPELQTRPCPPAYAVGQLLQTGACEGTCCYGVLVTIARARPTPFPGRKANQPAIFTARNHKQQTPTVTRTSCLGVGGWSSKKRQLLLPSKRGGEADRSGSWNRVAIRAMIREAGKPRIGEISTGLSNQFDWLNNGTNKSFQHKYNTLRVLFITLDWNHVSHQSFCPGLGRAGWSEDAPIVPLVRDWRHDQRLITFSVAMFLYGIDYAGAFTIKNTIQSLSDCAYPAASMSVSIGSGAWILQLRNAAFKKTGHGLLPQ	hypothetical protein IF2G_06122 [Cordyceps javanica]
TQW06704.1	MTRGSVIASFFQLGHGKPIGMQRATVAFGNRSLTLHAAPNCMTTSSINSYSLYLGQALIQGRVVIALAYTPRLAAFLTRTCLLLNKQQKNVHARVRRQFACDCGNGT	hypothetical protein IF2G_06126 [Cordyceps javanica]
TQW06705.1	MRADIVWMPKSCQAPPVFMIPANRAERKGHESPTPFRMPNSNATSPFGPDSLEKCGVCSLCNLSIVIFKKKNV	hypothetical protein IF2G_06127 [Cordyceps javanica]
TQW06726.1	MKTAASQLNAQRPGVSHGITAASQGSLAYAITVLARDGWCVIRAILYPLLRKPPWTTM	hypothetical protein IF2G_06148 [Cordyceps javanica]
TQW06732.1	MALIDERAIFCLVAILAYIQRSMSIGCLVAYLGSQHFVTYRRPSHAVLGVLGHTAIHVPRTHFLLHSTGRQTQPTSSSSFGQPPGTLSAAIAGLRFDGKRPIHVCDEVGREMGRTGFLAMPLRRQRLQLASPGSYFGEKKLAL	hypothetical protein IF2G_06154 [Cordyceps javanica]
TQW06734.1	MQSCQCGLNHTYAWHDVATAIATVYRFDKVTQLFAKVTPVVGHSCATFESLCRFLLRAGCDSYSDAMSRQKHVHVPHTPTISKEGAGVGV	hypothetical protein IF2G_06156 [Cordyceps javanica]
TQW06743.1	MERIAIGHVHGIHERCGTNPKGHDRGTPGSWLSRNRGYLDRIPSRLHPRQRVGYRQFVLFPPRVFGG	hypothetical protein IF2G_06165 [Cordyceps javanica]
TQW06748.1	MKFNFGCIGLTGFLTPTLVYVKTVPQTCDLGDRLFNRGNAGVEAMGLRIRELDDENSVTQSVRLANENSALGFIRLRLSSVEEDGPWDGSHPSPKFDVCSPLLTIDTLAVLVLDQ	hypothetical protein IF2G_06170 [Cordyceps javanica]
TQW06753.1	MVQQETNRKRPVHKEIFVPAFYTLPAAFTADLTFSQRNPESKIALKMQRTEVEEKRKGSKSDRLQNPKVEEGGPKVDMQANGPICEASVRQKERRKAANQWRRDREAIKL	hypothetical protein IF2G_06175 [Cordyceps javanica]
TQW06756.1	MPSIFLPWVLLALECGGPLPRPTHNEVPEVSRATMRCLSATRSGYSHRFNLYRLQARSHGVRTPGNKSGLVTGTITLIKSPISRVSTASNS	hypothetical protein IF2G_05140 [Cordyceps javanica]
TQW06758.1	MVPLLDQIVEHTSLPSCQSISKQLAGASVQPPLCLSASLPLCPSTSLPLFVCLYHSPISHDALHLHTNPPTPFLCSSRPPTPSFCMLFLLLPHSDVQILALYALLGTVEACGRGCAFTTFEKGKMADTC	hypothetical protein IF2G_05142 [Cordyceps javanica]
TQW06773.1	MSLNAGPRDEGQWKVFAGQPARGSSSGEPWREGVGTGQAIVAARNFTSRCVGGS	hypothetical protein IF2G_05157 [Cordyceps javanica]
TQW06779.1	MATSRYQHNKMPSNFRASMRITPSQSHTRSTSSFVGFSAAITINSIINRQPSIVGLAQERTSFAAELGLLEPRPLVYWSSVEDRIGCL	hypothetical protein IF2G_05163 [Cordyceps javanica]
TQW06787.1	MCGFAPPTATVRTTKYSLNDLRPSMLASDHPLPKRASDCLTAEEKHATVGSYLKNWSNLFSMIGFFWCPTLDLNLLFPLLFKYCFYLDVQAMNRLLLSACVAQLPCLPSALPSICEHTPAGLILEIETFMSATMIEPATFAD	hypothetical protein IF2G_05171 [Cordyceps javanica]
TQW06791.1	MASLFFRGSGVHPPFSYPIQRERRWPSVPSLISGSQARDSSFEVSTLLLFASHFCTRPTLSTVYGAWPQAAKATIWQRTVALLVTTTPSRLRCYSELRICAADLHACHCIYGYGHYTRDVLHPFISTSFPLRSIPRKWVPLSSHNLAAAAYFCLSGPMSS	hypothetical protein IF2G_05175 [Cordyceps javanica]
TQW06794.1	MRPVLVNLLLTATTLSKPHIPCFPKSSTGWPTGTPDSQSSTCLVSTHAGTSGFRYNCLPLRMLAWGPRPKQPKPTEGMTRDNSHRFQPPPPDRRVKKETG	hypothetical protein IF2G_05178 [Cordyceps javanica]
TQW06795.1	MPRGTLSAAFSKLATCAISDAIQSTSLASFESVCDTLCTVLNSIEVVKRKSWNTILLLMATKRHKFSTTGRRPHNKCNHKNDINLKINDELWFCKVVGTKSLERQDSGRGELVPVVRRLLPCHV	hypothetical protein IF2G_05179 [Cordyceps javanica]
TQW06797.1	MTKKRSCSQTDERSRSKQAMRGGWRVALQGSRNNQSSTQVCSGPVDCERALARSAPESLPEYMH	hypothetical protein IF2G_05181 [Cordyceps javanica]
TQW06806.1	MRMHIGKAGLVLVLVGNTDTLLWLGLRGSRCVGTEKTVVHSFAIAETVHSQTCGAGLVSRKARQGDTGAGNRSIISITTTIRHVPIY	hypothetical protein IF2G_05190 [Cordyceps javanica]
TQW06807.1	MQFANLAEIFGQQELTSISEHPTPITTPITKMEKSLSVYVLRVFYELCPSQEANVRLLICTVLTFHHGWLITASIHTSLLSKLSTCHHLLLGTDTVTVLHVGQLHTSCWRRSI	hypothetical protein IF2G_05191 [Cordyceps javanica]
TQW06809.1	MPLQARTTLITSYIGTLRGLVKPDWEGSLSKKRLVPPQTQLYQTPETCSRRLDSETLHTQTFHALFFFFMAIRCVSARLGTAAGRHTNLPLSFRARQGAFIFLQLTYICRVMMGNSQFRTCPSGNPKHLQWQFHCQITRVSATLRRTRVSE	hypothetical protein IF2G_05193 [Cordyceps javanica]
TQW06823.1	MLTAAQPKGTRLARPSSPHKTQCDKCLACVSGLTVLGCSGRDKVRVPSDWWYLFAVRPSFCYSANDAPLLHCLAAPVGVVSNLA	hypothetical protein IF2G_05207 [Cordyceps javanica]
TQW06839.1	MHGCSSPKAGAKGLLSRIRSKAWNGAGSAGTHARNGIAPPSGRCRGMGGHAEVFLLKDGLGKGKHWKKMWRRWTVEMMVYAKRIKASLRACSLKSLRIAMDLVAHSSFPCTFSLLSYSCAVASCFFFGLQGANGQSLMALDQPECGAMMEAFCQRILPWGA	hypothetical protein IF2G_05223 [Cordyceps javanica]
TQW06843.1	MEQKCLDLEGRLSAAELARDDATTKLEHLQSAFNVAELARDDATAKLEHLQLTFNANIAQMKAQCDAKNLQYENNCNDQLERHKRERDDDLRRHRLTFTIGLAHARSNCDRLLNSAIEHKDEELRAHKRSFEEAFGSRVEEAARLVRRTDAQASDRHSQLIKDLSERIDGQFSVLSSRFDAMANDMTSVRANTGSILQTQSSLSDAVTSMCNESQRVSMSVKANMCQLTELVEGLGVTLVDVKNSVSRVPSAAMQMQAAINNVPNVLETSIQDGTKSLVSMLSAVLEHVQSISGLSPAMQSVEKFMVTLKPLPKLSSKIVRSLDVVVAGQSALERHLHLFRTDGHDIVEAMKGCQEVLGHIRTEMGSFATSHTYELGNLLLQFDSGNDEVVAQMQSIAT…	hypothetical protein IF2G_05227 [Cordyceps javanica]
TQW06844.1	MAMPRATEQTEMASQLDMIGRVGLGACSAALTELADNWHCLRYRVGSVPNETAWGRHETQGPWIFDNGESGILQLSVNSKVISLRIQKRLGLKDPAR	hypothetical protein IF2G_05228 [Cordyceps javanica]
TQW06847.1	MTGPVTAPWTRGRGNGLQSLPIRLSHEISPSAHGQACSSYLPFPPGLLIHILNGRSEPVIQEGWWSSSIC	hypothetical protein IF2G_05231 [Cordyceps javanica]
TQW06848.1	MAVATRCTIAQQGAGAGGLPTGINVQSANRRGSWCPLLAAVTSHGLVPPSGRITGNAPYSTGPYRYHFQAQCCTIWYRGVLDTNDDDDKWPSDKASARKVWRTSHTLDLPNLAKSGPSPLCILPTSPRVADYNPMHHASGH	hypothetical protein IF2G_05232 [Cordyceps javanica]
TQW06858.1	MVMIRVGHDEIRHHVRRSFGFMSIIVVLFWFQAAAKDGSRHGVWAGNIVEFAQNMTADTGNRPQSRGL	hypothetical protein IF2G_05242 [Cordyceps javanica]
TQW06859.1	MMGMPEAVAARDSPLWQRQRLEPCTIHPAADSATIVIGCPGLRRTGVALPLPRPLQPSPSLPTAQGFIRRPQPHCIDPRGDVNLRPYPRKCVECRQTHNRQTARQKASPSPVTSPTAPHSIPAWQVLSTLLPMMSPCVVHLDRPAVHVCGILFP	hypothetical protein IF2G_05243 [Cordyceps javanica]
TQW06863.1	MVASWVMVGGDGFLDTTTDNVLADYKLSCIHMRRRKSTFSLGAQGQGPGANKERGIHGKTWSLQNSIPALFWHLGSFEGRRKAAMRACVLGVCAFSTAGSVGWPLLVSTRLFSEIGTWLVNRENSRALLGRVHITHRNPSDGVPLAPQGGGLVSVLGSLLQPHLQPRPQPQAA	hypothetical protein IF2G_05247 [Cordyceps javanica]
TQW06864.1	MQFIVTPMKEAGRHGQDCLPPIIGQRWSEGGGNETVNRQNGASAVTSTFVGTVSAAWVPLELRERKRTLMQWPGTLFLFDELSIAEYTRQQGASHASQVLWQFETLVGSAIVVQARAIQPLTSGWQGCYDGLGIMIPYPGLY	hypothetical protein IF2G_05248 [Cordyceps javanica]
TQW06865.1	MLDRNGGFAQIPIPSPSCFPPLPLHHLAPPSFSSSTLSILIHPPPPPLPVYAFYLLILLILLLLLYYPLRRLFSILSPSISSPICTIKSLLPNNIVTSTSKKVQHLAIAPSTLNYNKTRNFVVASPLLDAALLVSST	hypothetical protein IF2G_05249 [Cordyceps javanica]
TQW06893.1	MMMKGPGEWVSRQIRTGRRRSCWWTKQASDVACLSVRPVVCGYLHLRVP	hypothetical protein IF2G_05277 [Cordyceps javanica]
TQW06897.1	MMVCVVIQDLAGNRVPRSKFGWPWWAMEVGTDATTTEGGTRKRDGGPHGHLTLVPPPPFSSSSVQEERRALANKGADLQLGSGSTQ	hypothetical protein IF2G_05281 [Cordyceps javanica]
TQW06910.1	MYSCTYSCHTPTARADGTDTGKKGASNLPAEKARVPSAYVHPSVLLPSLSLPHPYSVPGTAISALKSVHVCVWVVSVPLPVSMQGW	hypothetical protein IF2G_05294 [Cordyceps javanica]
TQW06915.1	MALQKFPTQGLKPGLHLAHFSFSHRPSNISSHHKAFLGSTPSRAKQTFVHRVDLSETIAHILGDIWPQRHDVGMPLIQVEFRSRRQDSLARSACKPGCARSKIFLGHLVIILRI	hypothetical protein IF2G_05299 [Cordyceps javanica]
TQW06920.1	MASSLSFSCPRFSSSRAQDYRTVARGRERIPFLPRLYGNLIPLVPSRHRPCHCLNGENGKQEDERERRGGEKAKKKEGERERHSERNRENKGRVRVYKGQRTKGGNHTASSSVLHLLVS	hypothetical protein IF2G_05304 [Cordyceps javanica]
TQW06925.1	MTTSPTSPICFALLFLGDCLRTHRTFDKSTRHTFDTHTNTRHTVHGKSAASTCLLQQLGQVPVDLCLSAPGAPSTPMPCKIHSHTQCRPRKRGILAANETDQNGCLTRRVPGNKYLQETIIQYPYGALLPYLPVLILGYGYLISYLPIYSVLLA	hypothetical protein IF2G_05309 [Cordyceps javanica]
TQW06926.1	MHPLYPPAVPANLPRYTSYLSRTSQTWHPDLRLVCFLLFLPSSTSRYTHLRSSTTNLWTTLTPIFTISTPTKSHPWACHLFSTPSRTVLGDPSSGHLSQNIGALPYLTTVSLSPRPCALFSRLVDSSASTSSLKRSAVASLRFPSSSRLTHLVISAILIPGPKAPRCHHSTPPCTYLSRPAPAPTSCKSPICRRLH	hypothetical protein IF2G_05310 [Cordyceps javanica]
TQW06941.1	MRGRSWSDIGACSSGWADLTRLQGLLRPPLYHNTGLLNRQLTTCRAPSDLPPPSVFYVSAGPISK	hypothetical protein IF2G_05325 [Cordyceps javanica]
TQW06946.1	MPPSCRLLIKVVCRYVAIQHNTTATYWYTYLPHPPTLVPSNLPAYPRHTAIA	hypothetical protein IF2G_05330 [Cordyceps javanica]
TQW06948.1	MPICFRRPLKRLNLTPISPRHPPPPSHPSNPSNHRDNQYFGLRSGTTQQARQLPPLSPSSMLSFSTSHLRLVPVSHPTSLIAGGIY	hypothetical protein IF2G_05332 [Cordyceps javanica]
TQW06990.1	MANDLEKAEPLNVIEKTSATKQEKEGGEPVPDWEVVHSGEARIEGAQQGGTVEPQHAWSRRSQFTWDVNWGGRKYNIISWDFTVKF	hypothetical protein IF2G_05374 [Cordyceps javanica]
TQW06998.1	MACNYASINRQDLPHHSTPTCHLHHLMIDRQFAQQTINTSAAISTQRTGWRTGRNVSPPINKRAAMQGTALCDEFIDSLPRSYSFFGTGFIHSAQLDPEIY	hypothetical protein IF2G_05382 [Cordyceps javanica]
TQW07005.1	MRLLLAMSSHRIETLPIRALGYAQRRTDRHCATRLACQGDDRLGRLVDYASYMRRRLWDTDDRGHCDGTHVGGIAHCACHDSTAESSAARLTDETMHVASGFQVTWFPHLLDWQMPTPRQPVFLYCRIG	hypothetical protein IF2G_05389 [Cordyceps javanica]
TQW07008.1	MIDNGRQVSAIVYLVAEYKRNENASRQAETCSCTGTRFRHPLLSIWAQIRQPVRSNLCLITSGPVRVQGSQQTRVLVCTSMTSQRRRCTPRLSRPRYMALCRAACPHPPTLPLTKQFGDDDDDGLALTRLRLSPPPVVGGLAAQLPVVCSAAAMKRFQERGTGSPVGNIAQGQPYNAAPPLGQVVFLIESRLYHGHALSCTRTRQRQSLAY	hypothetical protein IF2G_05392 [Cordyceps javanica]
TQW07011.1	MVFRGYIPAPRARKFSDCLENLAIIFPCRCARAAIRHSPHPWRVSRAAEVLAHYALLSTLRRTRDSKTFQRRCQTLGQRGFAISKLDLKS	hypothetical protein IF2G_05395 [Cordyceps javanica]
TQW07024.1	MISRAHFLLMTRTANKTKSAAHDEKDMRVREAQTGHQQQKSRHQRFVLMNQGGASVSISRGPPLL	hypothetical protein IF2G_05408 [Cordyceps javanica]
TQW07028.1	MASLPLPRAQCSQADLFLQRVLITAVPNVALPGSLGKYLGHDETAQVADLVLTATWIGVSVEADSESRGARKLTRLLHRWVIVCLVQAAAGNPNSVLIQELQICEEERDPALGSG	hypothetical protein IF2G_05412 [Cordyceps javanica]
TQW07032.1	MRPWYGTKRSHHQTLHHWDAQGEKRITMVDVYHRCGTMHRQTAQLIPSPGLLRDILDQHHRPFVRTIVNKRVPFIFTLSFDLLTALAALQYPPCNYSYCASSALKRTNSIASIASFPDPTWRYGGSPRRWLQMHDSKWRRRS	hypothetical protein IF2G_05416 [Cordyceps javanica]
TQW07033.1	MTDNAKTRETDEAFPTPRELRGGASRPLPYLSPSCLAAQKMSTAPCDEPEECARASNVTRRLMDAGDVARLAQALAEFTIRTSQNEDIGTSDKRQATSLRTSQIRRCLYI	hypothetical protein IF2G_05417 [Cordyceps javanica]
TQW07034.1	MAFQQRLASTDRLPFAHANCLPACQLSRPSGAANQGPKGRRPGANNLASNHTSPWGIRGPNNKDEAGWAKLLNVLAPGVITGATEGEWRKWILIILQEMKRMLCKFRHALLSGRLSG	hypothetical protein IF2G_05418 [Cordyceps javanica]
TQW07038.1	MKQLLKPTDAAHRSAEERRRNKHNSEKDRKRQHGTFILRPTMAAWCSQTRRRSFTANKSYESQTARRCRSLAIISLSLSPNTCMRPVAQIKWKDHLTTYRPCFGPTTPPDVRHIGTHAAPHRVALQSLTLARWCLFFFFFLTTISLDTFCCLVHCIYSLDKFTAERQPGAPKPAYFSTLVVRLPQSLPPTYTAYRGHASARRSLKLLYSLL	hypothetical protein IF2G_05422 [Cordyceps javanica]
TQW07048.1	MRTRKAKYTKPNLRCCLAGMKQIDQFHQKREQSNPSYILAHSTSVHQLLSSSALQLRRCDLMGSP	hypothetical protein IF2G_05432 [Cordyceps javanica]
TQW07057.1	MAHKYHDQPTARGALCRRRGPASLGSRLGRNTKGGASRGVAACISQAVRWKPLVGNRDHGKWKQFLHGQIRPNAKCEMWPAMAPSSVTLASERGIPYHKLGAEWYLLQEASRNSSALAEVPSTELSLPVRHLTLGSWQPASNWPLSVRKHSGARRRQFGKRTLTIPSSKCHHRFSFLQLSDVPSFPSSVSRLCRYIRLPDRTSYYIPQPTSYIAVPTYSTIAPASVALIPAFHY	hypothetical protein IF2G_05441 [Cordyceps javanica]
TQW07073.1	MIHRHSGIEIALSEPPGSFIMRVILAAGAALFGRRRCVAHVSAWCGIRHGRTEMVRHNGHAPR	hypothetical protein IF2G_05457 [Cordyceps javanica]
TQW07096.1	MGLGTDTRSGPSGRQEGRAAGGRCTQLTVFISGILLSLVTKLPSTKVPTNTAFRSPQRCFSQSLYFVGSEQLHQLVLLEKSLALVTKGPLYRRHHHHHHRHHHRPSPTIFPRHDGFILS	hypothetical protein IF2G_05480 [Cordyceps javanica]
TQW07101.1	MLHIMSCCVACGQHRRSRLLLVQDQIGKYPAQDLTSIHFSCFQHSVGETADDRSSCPRTPVALSPSFLVGSGRIPGYQGTLPMKLYSPSTDFDRFSAMPSWMRRRLRRFGHRSGHATIDSGGRRMSTLDRAGQFIRPRVSGEDGKGSVAHGSRRPTMDMLGSHHRAY	hypothetical protein IF2G_05485 [Cordyceps javanica]
TQW07106.1	MGVYNVFVRLMECSCNGGHTTRPEGPGRILQGNWHWAAATETRLHCLENGINRGSLLPESPPALRKRSHANRPASDRTAQLKRGGQQLCVECGIEAASNHPSSVHACISGWFWLKVVCYHAQACPLENSEYTSAETVWGSIKLSSIVCWTVCSNKCATDHV	hypothetical protein IF2G_05490 [Cordyceps javanica]
TQW07130.1	MEPAALAATEPAIVTSSYIKAAVTPVGINLAGLILALRRVSGRGTAYALRDSSPAGQLGERAVLGSAACAGKGKDAVGSLFRHVEDGADVAEPAFLAKRLSPAMGQHPATYRAVARAVRVHSPMANSRALTARSPEHERAGGCIFRGPFGIPVLMTAEVDVFCKNAHVLLAMRNCPWPFGKNCQDNDMFLYLALLFSW	hypothetical protein IF2G_05514 [Cordyceps javanica]
TQW07146.1	MIRWKLPASVPPFVHFAGHGLTSRRGERGSCLPRSSAGRDSGVPDFIFSSSSFRGQCTD	hypothetical protein IF2G_05530 [Cordyceps javanica]
TQW07157.1	MFFDPSSSELPPYQLFSDNHSNLYRCRFIRPPHRASSILCPPTRPCTACVQCLGFCGCGLDDSLTRGRACCRICHCAGVWRARTDTTKRVLSNKTLHGLCGGRDGAGDCAIGPLHLGPSSSCLIDWRFFLPLLILPACCCPSAVSKRHDPPATRHAYAMEHVWFVTTRCKYSPQ	hypothetical protein IF2G_05541 [Cordyceps javanica]
TQW07167.1	MTARFSPRDFLLIRIPQNLFSLEKALRSTHDSFQSVPFTFSRGGGVGPRIGSTSTDDYKCPITTTCARGSAVFNFKVAADEGLLEGVSIAVKAIRAAQSAIANVCQQVAG	hypothetical protein IF2G_05551 [Cordyceps javanica]
TQW07178.1	MGRRQKITSVVATLTADPLHESLTVLSHLLTIRTMKALTACLLWCRMITKLSTLRSSCLFQAFDSL	hypothetical protein IF2G_05562 [Cordyceps javanica]
TQW07185.1	MRSYWNDRSYLGVLHRPQQHSLAGRHRGRRRHNRAGTDNDHLLEARHNGSELVKPAAWRAIFVFNQEGNVVRVARM	hypothetical protein IF2G_05569 [Cordyceps javanica]
TQW07197.1	MRVPSFVSWRRLTRRQSTGRLWRSTILSASFPAETSPQVNSASRNRNSKHCEHDEGCILPGQRHGAVGLDGNEFDEGCRYRQPGVPWTNN	hypothetical protein IF2G_05581 [Cordyceps javanica]
TQW07206.1	MIDTDSDSVVWIGKRRKQKPSKRKGSRKIGGGRVTVRGCHSGRLKPWTCLVLLLLPVVVVLGAGSSSRTSAIVRTVLEFPLPLHALAGKRLRCVWIAIKLQGYNRP	hypothetical protein IF2G_05590 [Cordyceps javanica]
TQW07211.1	MGGSHSLVRTGLQASRYGVPALILREIFIVWQLSMLISSTDYLLVLVNHLAAYWYT	hypothetical protein IF2G_05595 [Cordyceps javanica]
TQW07214.1	MRCFRNWPRRMTISKGQDDWYRITRQVPSSVGHHRTQLCRFDQPFQHPWKPPAPMDGHQSRCHDGNAPTPPLLLLAAYLHAECLLAEQG	hypothetical protein IF2G_05598 [Cordyceps javanica]
TQW07225.1	MHISIQATVAKQFSESLFQSRTKELACYLLLSARRPVVGQNRTTERFNTRRPCGYSVTKHVADTAA	hypothetical protein IF2G_05609 [Cordyceps javanica]
TQW07234.1	MFYVPPSWPPLPLAPRHGSRARLRRGQPISEPPTAREGYTPTDGLYPSTAAAPSTPPQRAGWLAATCSLVCCRHRLPFFILNYGYMALQQPTFFILIASCC	hypothetical protein IF2G_05618 [Cordyceps javanica]
TQW07235.1	MNKAEAKTQCLRYHRAVFQGRCYFQVEALSRWPGHPPPGLVGWLPKYILKRNGSWRYPAVLFLLRYSARESNVQKLLRRARSEPPAFPRWRNESRTRSSLGSDTHCYVAIHSILPSDVRRISWGGTRVYNPKPFGVCQGHYEICDERRDLNSSDSDWPTALIERCPPLLVRSDYWLSNGPRHGDAAAIYPDSVLI	hypothetical protein IF2G_05619 [Cordyceps javanica]
TQW07240.1	MALMLPSHIYSIMSFSFLGQNPPVKRQKHPIVTRHDHKTETVGSPRHSPLSTAGTTTIVTTITAAPSPSTHYQYSTAATVAQLPARFENKYENKGRPIHTPSNNKRKYHVLHPTAKARWPSSYQYPEVGWLFSTTYHPR	hypothetical protein IF2G_05624 [Cordyceps javanica]
TQW07243.1	MSPNRLIRFSQEKQGSKDDWYTESSISYNYSFIRLPRNVCAQLVQMGCAPDTMEPVLGISIPDSGWRWGDEYEVRVRLASDYQDGFYMHDTSPTEPAINSVHESSRLKELMSDTTTIPRSNARSCTRPLGMMLQGCLAWYRRQRSRSEKEKKRPCSDSTLVPNNEVDEFSMKMGSIPIDGPGHRQCQPTPPQPAAAASQITEPQRFCKYSSEFDRRKWGELQPQVVPTDMVLKRVKLSTLDSSSLHGSLVVAAHG	hypothetical protein IF2G_05627 [Cordyceps javanica]
TQW07245.1	MAVQWLCLPASRISAASVSGSGYKALPMQSRIRFQAIRLVSSWRLSRVRALQRLRLAADLASDYHVLAAFALRMIQRVHDVTLPSQPPRAKVCTFCIIYSHESEKKKELIQQRQTRITLCMAGGSSTCLNVPLKREQVTEQWGRAPESVVGRHASAAFATYVFNNRKIKSCVFFCFSKTPSFLALDTRQERSSGGEQTWSTTRRIRSRISNTDTGSRGRGSLSSGGAHTTSGKTYWSVSVRCTIKHLATDFEK	hypothetical protein IF2G_05629 [Cordyceps javanica]
TQW07259.1	MWPGRFSLQLKADPVKDSRYICTNPAHFSFHGLRKDGYSQVKKNTEQPPPIASNSVSRAY	hypothetical protein IF2G_05643 [Cordyceps javanica]
TQW07260.1	MPAEMLGRTPGYQEKFVLTEYRMVSPCTARDKTSSRRARMWTGQADGAPLSPDWWLYAPDHMASRPQQAGRRNNDAGGWWVGKLGSRDGDGLVAQMASCRCRRKTLLELPRFAKGHIAGVIHALDVPKGCQQGSWPSGFVKAAGGRDHTQVYLLRHVATDLPVTERGSNRTCSCAYQFAVRGSEAWRSLAGMGREHGKDVRDLACWTS	hypothetical protein IF2G_05644 [Cordyceps javanica]
TQW07263.1	MRAGSRRASTPRTSSQSRGVLSTNVCAVASDGSEAEGAKKSMVVRRRAEKAGVRDQKTVSSAYSHVPARHQCRASPKGQGSTPCARRTTSPGGQIARGEKADAGTSASPSRRRAAPRLPTP	hypothetical protein IF2G_05647 [Cordyceps javanica]
TQW07283.1	MSLASCDTLSLRFRPRCRAFPCYSAALSTLRAWPFVPSYLPHHTRNEQIKEIASRREKTCTAPILFPIRTAGGTVASIDFSFLHFDTNIRCRRPLALCATHHLPAPEEKPKLTTAKQDG	hypothetical protein IF2G_05667 [Cordyceps javanica]
TQW07292.1	MISFNTHPGRNHSFLDAFVRLGAAPSAAVLSVHLERVTRDQTVPDDMKASSDLLFTGTRKSNGMRDRLGECGGV	hypothetical protein IF2G_05676 [Cordyceps javanica]
TQW07295.1	MFATDREPAASQAGGVTETGGKGERERERTCPLAAEYLALAKGPALAAGTAETVAAGRQGPGASRVAGVEEVLFESPKAAAAGELAGRALPGHGGRGGEDGKQQHGFPAGKHGVAMRAGVVKRAVNDGGRVLVVLFGRVEDGKFALV	hypothetical protein IF2G_05679 [Cordyceps javanica]
TQW07300.1	MSVHPKQAGRDGSPDRDGLFDRACITGGAKAPALFFLSGNKCGETVFERGVVQTRNASQALFSCNQGSCPSYVVGSSQSRDPIAAKPCSMARLVGQPATSIACIQSYLEEESRTLS	hypothetical protein IF2G_05684 [Cordyceps javanica]
TQW07303.1	MHSLGRYDTDYTRQRQCGITCFPFGKHRVVISGLVWTEVDGNTTVFPALVIITCMHLGIEHTADTGSATQPGSGLRCQKRHFDFAALKMRGLGIRMQPQSRCGVRRAKARRA	hypothetical protein IF2G_05687 [Cordyceps javanica]
TQW07305.1	MDTTRGNGLTESGHWQGKNLQFLKLFRFIPTRNPGFLVGRKKSQMTAPLISQARLLTRSGSRTVKKSYAVLERQDNVLW	hypothetical protein IF2G_05689 [Cordyceps javanica]
TQW07306.1	MIHTRMLRCEDSMFWPSHKTLNLNPPDAVISLSVTSRAVLAQACPRFQVVSVPCTPPSSSAFHVCQHGVPVDLQPSSLISRGKVKLKIEGGVGIANRAEDWFERRWRRDGLRLYKNARGKVSGQHLHRFS	hypothetical protein IF2G_05690 [Cordyceps javanica]
TQW07325.1	MLAYFVSFYDIPITDPTTSPDGDDDLESIIIRDPDTAVDQLESILGLIEDNFTRFRHRAAEMVTYSRPAPRTKRSRFADETQHTLRMKRYKDESPESDHSDAHASTRLGWAIRSTPSSQRPSATPELRRQARELARAQERARMSHQSSDDDALTSANPNTSPREPHRIPR	hypothetical protein IF2G_05709 [Cordyceps javanica]
TQW07327.1	MSHVLLTEYGDHYICGLMPCSGGRVRSATARSGGASACSVVKRGPAIPTESTADAHRFSGLLGGVDCPLNGPDFRLSRWAAQRCQIVRSAACRGGASILPDVMRAPYSVKMTSTDSAFNHCRA	hypothetical protein IF2G_05711 [Cordyceps javanica]
TQW07328.1	MFYCPLTKTLGRNWRGPTKKAAVSHHHRYHPGPSSPARNRTFPVMCATCIELDMAYQSVDCTLPHVINVAVRLGDRWRFTQPCRATTRSSTAKPSVPRKGKQPRTKRELCGHCGGIVFFQASKFPALYVCSKYAAVCNEAGP	hypothetical protein IF2G_05712 [Cordyceps javanica]
TQW07367.1	MFPTAARAGTRHPVLVVPGAPNNSKEARQAARACLLHASAARLQLTDGGVSLRARVELGRQGKGRVVRLPVICTVCCRLVLDKHRSTWRSGPVGRRWILTGWPVRSAERMRRGVCGPTQEPGNGLDAGGWWGVDGGGWHGGRWWMVDGW	hypothetical protein IF2G_04528 [Cordyceps javanica]
TQW07369.1	MGSRHIRQMADEPVNLMSMHMARCKRICSAILKDQDVSELSINWRPFKDL	hypothetical protein IF2G_04530 [Cordyceps javanica]
TQW07372.1	MAVQCAPLVDIIVVVVAADLRRPPPPPPPPPQTNFVWLPRALPSATYRIGARMYQQPKLANVFLAALVGLAFYQESLLDAEAQDDNAADDPWQGVIHLSLAVKHNFNNKC	hypothetical protein IF2G_04533 [Cordyceps javanica]
TQW07373.1	MARHVPHLGSQRRPTSTCSSQGALLHTLPTKSRVPGRAHQPRPDPVAALISLATSLPVSLLARQHGRGEEKKKARHSSS	hypothetical protein IF2G_04534 [Cordyceps javanica]
TQW07388.1	MYGVLRMHSVLAMHALSTSKKSPVLKPLIPPTYLPTYRDASSLAGPLTLWIVFPSMDCPPRPNVPAKLENMEE	hypothetical protein IF2G_04549 [Cordyceps javanica]
TQW07399.1	MLHKYAAKCQGAKADVVLFAPIDSDAEVEFTSVLTMRRNCEIQLSSRLSHIPLLGQLRAFLPVVTSSALPLSQNMIQFHSLIFLIFDCSYHTIV	hypothetical protein IF2G_04560 [Cordyceps javanica]
TQW07408.1	MQCACSPCMYVYWYFLLQCTYAHASTHIDIQIGRPLVMRINSLEQSLAESLDM	hypothetical protein IF2G_04569 [Cordyceps javanica]
TQW07410.1	MRWPEMTLLPCLEAAPFQQGAIPNSSFVSFCFTLLTMPIHVRNFAQRAAYSAAIPAMTAAKEQDMGWVRVRPAVTCCLVAAEKPHRLGGAGRVSAADMSIARASSIFSSFYFSFSFSSFSSFLLFLFPPPPLSSSSSFSYPKARPNASSPPSRTRAPVWHRFSPPTGKTMLPASSHKTLMVGRHAGKGRRALKRGAHCNGRWAIGLWRRLCVSVKGEPPM	hypothetical protein IF2G_04571 [Cordyceps javanica]
TQW07415.1	MRGWCVPVPWEKLVWAAADGRGPLTPKGVSLLVQSALRRSVVEEGSRDARGEMRYASRRLPTSDGRFNDVARSMGFTRR	hypothetical protein IF2G_04576 [Cordyceps javanica]
TQW07417.1	MQRRAALGIFPTRHGHAYILGTTLGHQLKTPKAQTWLATWRRPLLCNGTHDEAKLKCAPTTN	hypothetical protein IF2G_04578 [Cordyceps javanica]
TQW07423.1	MHNQVPNATHSAKLRGFQEGIDDPAEFGGRTLSVVLAAMCLLEGFDMSTSCLSKHRLSAATHTSLSRSFSSNSNWTRFCAPVTRPRRHMNQAAH	hypothetical protein IF2G_04584 [Cordyceps javanica]
TQW07428.1	MKTSSRDKLSVWYTPASCNCVLMPRIVRIARTATTFKGRFGCGICNVSSSSSGVVFARPGDVTLEKFRLRNAVLAMTLCLETVKISYKGLSSYVEICLCRGFRFL	hypothetical protein IF2G_04589 [Cordyceps javanica]
TQW07430.1	MLPCFGFLRSFARVLWPLVPVGSSCHGKLIPTCVIEVSRCCAWFSLSRTRTMTTMLVFKEAPSLSKCQSTRMLGK	hypothetical protein IF2G_04591 [Cordyceps javanica]
TQW07438.1	MRRTMDIFNEGHIFAVYTEEETTNQLNPVTESYWTNHGSTQLTDPSLNLV	hypothetical protein IF2G_04599 [Cordyceps javanica]
TQW07442.1	MSADRLKDRNVLFKRPSREFSPNQLVRRAPPRLRVRRAARPSHLSYLYPWSCLTTCSCCRDGRKGG	hypothetical protein IF2G_04603 [Cordyceps javanica]
TQW07445.1	MNFNATNVGSVQQPKNIHMTKKIRLFDVCDSSTHGSSSLGSKHASTYTHTRTPGDDTATLIQAGTRTPTSRKRGQPTGCQCGGQTVGPMATHGMAAVHLTHQAIAHHSFVACRHFAVQFFRGLRRPFFWSKYSFSYEKEGGGAEEKSPDASTPGGHEEREGGGGREGVVDGGGGCAGFGCRKDGDKKKKQATLIVWSGNGAGRTEQIASMALIGTEYIQWYRGRVCMGNSEPDFRTGLQSWTAGGTGVGHGGKRGSSRGGGGFITWRYAVRSTLPIYLTLTQYS	hypothetical protein IF2G_04606 [Cordyceps javanica]
TQW07446.1	MRLCDRAPTSSSSPGPWRDLESGEDGGLDVDWGFLRGENWRARERDTENESCEDGM	hypothetical protein IF2G_04607 [Cordyceps javanica]
TQW07451.1	MSVSGYLVQDAVLEPRTRDPPRHPSPWFLIAYRRFHVLLASTFAKAAAGAVPPGGHEAGGVRHDNAPAARHFDAAFWIRQMCPWYEVVPSPREGGFLHERPSARCKTLNHGAREPLQQPPRDQGPGDRARSLLLRRVPNLNLISKKKAHPPPPPVRGQWPLDARAGSRQFQTLTRAGGERIPVQTPAGRLRVDCRSSRPTASIVPLTPNLSSLQPNETGARQSCICKRLQ	hypothetical protein IF2G_04612 [Cordyceps javanica]
TQW07452.1	MQLAVVPTRTRFAGRSHSWRARATGLGRTRILQNTPAETSMMASRLKDLLGRREVRGWCNLQQPDSVITCQRIADEAKQGSHDGRLHAVQPRVPRFST	hypothetical protein IF2G_04613 [Cordyceps javanica]
TQW07454.1	MHGGSCMAWLGGVAHPARWPNSNLQQPAQSRYCTFEYFLGPEARVRHDGVRLSATQRTRVWGRGSTTSSSSSTESLMQTSARLRKAKQASAHVTPEPQCLESLYGLACIRSPPPLVRPCWLAASDWLGHGWFGCEGGVWAAKVQTT	hypothetical protein IF2G_04615 [Cordyceps javanica]
TQW07468.1	MLRVGGASKHAQRGCITSGVRDPSSLCRTICVPSKYYEEPQLNAVCKPPCSAPGCFQFTYYCPVTLLQLQRCA	hypothetical protein IF2G_04629 [Cordyceps javanica]
TQW07476.1	MLQAQKFLDIWRDLRNVKFLRMKLDGPMSILFSTREEASGSIVVGWIAPSSPSSFTAPW	hypothetical protein IF2G_04637 [Cordyceps javanica]
TQW07479.1	MLWRTCYLPNLYDRVLPLRHLRAAEATNLKNHFSTFQPQYLIPRFRCSYNLPSRSKPPPHHTHSSWAAAPPAFQLQRCKSTAAITD	hypothetical protein IF2G_04640 [Cordyceps javanica]
TQW07491.1	MTLTPLFPLIPLPSPPLSKHAQDIDLCMELLPLAATHGTWNFSSVLLLRLGMLFMGSGQPSQPKRPPHLYGSRLHLG	hypothetical protein IF2G_04652 [Cordyceps javanica]
TQW07492.1	MENNAHPPRLLIPKKKCMARSGFRQLSLSLRSKKFNLASHTVNGTNVSTSSAGAGTSRAFHWAPPSLS	hypothetical protein IF2G_04653 [Cordyceps javanica]
TQW07497.1	MQQNCIDRDKMAIGNSMSICPYSFESLASVRELLSAAGTIGPNLKEWRCWIERMTSLIRNFGHPPAQIANSTVVARTIETSDTRLVRVRSDQPSVSTYILGCFTNSPDGVRHIQVISFKNNPSTTGPSVCCRGHASARTSVMRAI	hypothetical protein IF2G_04658 [Cordyceps javanica]
TQW07518.1	MITPWSPRSGIRHHEATRMGPPRRTGRIFLVPNRFDYRAKNHMTGESVRHGQLSGSFKLRAAPTITIAAWRSVRYDWASRRVGRVLLSQSLVG	hypothetical protein IF2G_04679 [Cordyceps javanica]
TQW07519.1	MDQAVGALTEEAKAELPQSFHEWRKRSFKVDRQSNSLRVSQGCRTLDLTLRCNYYRTRRPEIRNS	hypothetical protein IF2G_04680 [Cordyceps javanica]
TQW07520.1	MYKSACFGGLVACNPLVRLLLHRDGGICASLLLSEQVSLTQPEPGHPPRDSQAMSLTGPSAACMQPLWRVGGDEEERAQRSVDAFARWFTYCFF	hypothetical protein IF2G_04681 [Cordyceps javanica]
TQW07535.1	MLKMPRCVPSPTRYYGPNRVIYFLASSRAAAEDAPSGPRILGTSKLYTLARDAQRHHRASKFEEASSVSSHWGLTNKVSTRRPRVAQSCLPANAKLNRKSLAPLPHPTLFFACIDFATAYLLVLSSYPYVRRSTPYLSGHFSL	hypothetical protein IF2G_04696 [Cordyceps javanica]
TQW07536.1	MTSQPRPYRTPSSADTLLREVRSTPESLSRLGLTSVPVTPSPSLFGLPSRPQYDAPSQPQFGLLSFFNHRQSSGGSTSPAIFQGTCRVLLASPNIPIYFNKTPPNTSSRRRQHALDSPIPQSALPAVLDVG	hypothetical protein IF2G_04697 [Cordyceps javanica]
TQW07537.1	MTLTLFRDGYKLCLACSVYVGAISLMVKKSHMYLETSRHHMSLMQVSSAGRLFGVCPGRDKAGYACRTLGLNAVWLRCRYLPDFAEMIGVLVDVSVHPVWPVRVDGVRPVRPKPLHDKRHTLAIILWRRNQFGAGQVLPTARTVGLDPSRFDTLTLVSEQVLTNFITTARRRQVPSTNLKDRPTYGRFADVDGSRTGEPIQENGQWIVKGRHACFLHAELRHSEACAEPGALISLPIKSAADVSSASSVGFLSPTGKLQSNAESRP	hypothetical protein IF2G_04698 [Cordyceps javanica]
TQW07539.1	MRIAEAKKKKRERNWSKTPKDIHVRAARALWLFFLSTTELLSSRSVDETTFSTCSFSPASGGLLLAFVLLVFCNNETTGSETQRGSIRKRRTERLTMYLVEGLDGVLVQMEQRRHTPIMIPPLSVEGRGCGVKEAPCYASGDREQGSSRKTRTTKHGCLFALSLAHSFSLSPSVSLSSLSSFPLALVYLKRMAQLPMPRALFPSRSSHMRGAAAGGCEVPTVTLDLHELVSPLGGFL	hypothetical protein IF2G_04700 [Cordyceps javanica]
TQW07542.1	MSEYQTSRLDPGQSVTRTPEHVERIRGSFGGTTSRVCQCRQRRSTSFPETLQRLTEKDPRTEEMGWMLARLAPREESTEGTKRSQGREIKRKGRKKKRRSIQGRNGNSDHRKLHYHVAPGYLYNACTGKYVRSY	hypothetical protein IF2G_04703 [Cordyceps javanica]
TQW07543.1	MRAVRGGAKSDERCKQQQTTPVVEAGTSQRPENRRMNKKYIYKYLSLQRMARARNEPFTVYRAGAWLVCDDTVAQVPLAPIVGLFRLGPDGTPTSRSQLSNSMSPATTTTPGGLAFGVWGGCVGDARMRDELPRGGEQAMDNSRERMVDDKD	hypothetical protein IF2G_04704 [Cordyceps javanica]
TQW07560.1	MADAGSESRVVKSPGKLAIHPATLVCSLRVTLASDDEPTSLLQYSVPSWHSPKPVRPLQGKQGAAGRELIPARGGVLYLASDPRQPSLNFRSPPCPLALFFLFFPCVSLLFARLRQLSCDYRPLRATPPKRIQYTRRQPQALGHPLYGQNAMNINFKESMHVNQKKAVCLKMLWLAVRCSCALPSKWLCATSTSQLVARHFDSDVTYVMFCGLYRFQSDIDGRIRDQGRGGGTIFSCARHIQLWAVQSTMSMMNPNPHRTGIISCSPLLLLCLIPLSRMSYCQ	hypothetical protein IF2G_04721 [Cordyceps javanica]
TQW07561.1	MWECAFMLVGCRRGTWNRKNDNQQHPIYSVVLGPLSTSTLKRARVYQVPLASRQGRCTFVTLLQKVAQNSRNCRKALSRTLWRRQTAVKEVDSANGSLPVAARRTALAVETHTTPERHASSTSQRGVHDVVARWGLHESFGGGDPNVSVGRDDPLWAATRREEGATERTHGSDAQ	hypothetical protein IF2G_04722 [Cordyceps javanica]
TQW07566.1	MSSKPCYSCPQATRPSTYLPTICRPGWGAAGLDSALATYLATCVPRYLHTALGPDTWVLDSFLPRPYLFLLSPYSSSATRNLAPSFSLSFSSSSSHHHLLILTLKQGVCPRAPYIALSAVAVLPLPGAKCLPASVC	hypothetical protein IF2G_04727 [Cordyceps javanica]
TQW07567.1	MCIRVTCPLLLSLVVVACAFLSRLPDVIDRCCRPLMGSCILLLFFNRNTN	hypothetical protein IF2G_04728 [Cordyceps javanica]
TQW07573.1	MGKLRARETPPLPPPLPSIETCKSEESVAAGSSLVGSHSKMCVCVCGSPWQKLQRAMVIDCLNGGKRRETHTDDMYDAQGIPYSTEYGSTLMILFENGSRVFKRETKVADPTWERGGRNRRLNRPDACLFSHFTALVRNTSQQE	hypothetical protein IF2G_04734 [Cordyceps javanica]
TQW07578.1	MVDSLGSQYMLRVIQQHQISVMPIKKIHWCTTWIHYGNCSCDGAVEPNPVSAGDPRTRENLQEAGWCILVLTGSQQCSNHQPQFGRYKGTASLAALAWSASMRDIFYRRRRGCHRPESHPPDACAQKHCCLLVLV	hypothetical protein IF2G_04739 [Cordyceps javanica]
TQW07592.1	MMVENPCVWEAELRAAKGRGRRYIPRRKDEIVLTYRSHFDPGVSFERIHFAFAVAQAAQAAPHFAVGNFGRSSLGMVGLTARRARSGSPWLTRYYSITAFQTSGCCMRLSGSLTGD	hypothetical protein IF2G_04753 [Cordyceps javanica]
TQW07609.1	MISPIFDNVVDEAGRHGFSQSRFRWRRVPDTLGRTGSGAAGPASPKLFFSEESSLPLTFAFCYHHHILYIISPIEFHRYVAFSFVIIDIAFVDFRQKDRSEDDRPRTAPVTSPAVAIQGYMLPSETWPETASPRKQSAWATAVQAAPSKAGSVAMQDDSPA	hypothetical protein IF2G_04770 [Cordyceps javanica]
TQW07615.1	MQITAFIYPARSNPPSRHVRLLSSADARQHQPISPALKRLTPSSGQSFLPSTPAAICGSSQFLDAYPSIVNHLVPSLFHLQHYQCGCDLSVNKRPFRQPRPCSPVDTNSL	hypothetical protein IF2G_04776 [Cordyceps javanica]
TQW07618.1	MVLSVHDKAIITTACSSPPTPGLQRPLLRQVGTYTTVSTRRDYLESAWHLTSDIPKTDALIKPVTFNNHPLPSPNSHHFTPSKSNHFLHHLDQPPILRRGFHPIIPILTDLFYYTFAIPLLYYSSPPVSHAGVAQVPLVPSRLITY	hypothetical protein IF2G_04779 [Cordyceps javanica]
TQW07623.1	MLKAARHWLPDQTHVGRKRSTRNPRSTWPLRQLESGTYKTAGRRTPSVGSPSLTVGKIWLQTAVSHKNRC	hypothetical protein IF2G_04784 [Cordyceps javanica]
TQW07626.1	MEDSGWETGQGCWVVRPRSSATEVREAPLARAGRLHFSPSNRTSAELKKGQWTASRWTTMALATATVSRDPNPGASVSLSLCLLPTVHRY	hypothetical protein IF2G_04787 [Cordyceps javanica]
TQW07627.1	MRRRQEEGGRREGGCVGEAAKEFADLRMVFRIVLSCGSWEIGFAGLQEIRDRRIIRQETEACDFLGMSTSELGLVPLRFPSRTVDVPPMFIEDALLFSGWFHPLQSPSQSLSLSRSLLLFPPLLANQAQTTRTARPRARQPEKSHICQSIALYCCKGITMLASVYHAGRRDKGDGCRRQGKASFLP	hypothetical protein IF2G_04788 [Cordyceps javanica]
TQW07637.1	MHSAHPVTPTNAAPNSGQGTSKLTRFFLEVVECGNGAAEMSRAEANTPGGGGGGRRLGHG	hypothetical protein IF2G_04798 [Cordyceps javanica]
TQW07639.1	MLVRDVVKMARSHRLPLDQSCLMSPFLGPLLDITPLPADAGQREWEDSETHVGTAATAATGAHTTKREAHRVAVAGMRVVVSGSQAPVSFGYTRGAKGFFTASCLSSSSSPWRTGQSDVQGMTPNKKLRPRMGQRRDGNRERGRVNEWERKREMERQRSGERGRDCERERAAVSSFPSSSSSSASSSSPCNSMLDSQRTRWVT	hypothetical protein IF2G_04800 [Cordyceps javanica]
TQW07646.1	MSRERTNTKKRMQQEMPQSTSRPTIVRFRAYMNHVSSASRTASQTAQPIPSQLHDAGSMDDEGGKILLVRRRAATTPGSSRAGGPPAGSGQLGPRIIHQHPITAK	hypothetical protein IF2G_04807 [Cordyceps javanica]
TQW07655.1	MPSRSAGVNNSSRSTGNLLGDASKIDPSVGAVGVEGEPVGSKIHSCLESGLESRHEFNGASQSCPWQDVTEQRGEPMSLRSPISTFVMFAGWRVANPERD	hypothetical protein IF2G_04816 [Cordyceps javanica]
TQW07658.1	MHQNLRTSLPPRLPTSLLKVKHPTLLSLHSLSRLGQRHIAKPYALPFIPKPTSTARRATLSCLRIVQDGIGNLLRKHVCASNVSSR	hypothetical protein IF2G_04819 [Cordyceps javanica]
TQW07668.1	MAVPIVGNGQAGSYQYGLLPDSSSGEREREREKGERLETETPTAALLLHAKHGALLALGGRRVGAGLLDEIA	hypothetical protein IF2G_04829 [Cordyceps javanica]
TQW07670.1	MQCVLVSLPLTSYFPNANTSSRTNNPAPNLDARQPPDPIRTTKLPHGICPPPSRMLPPVPKRTNSLPNLPAVHPHRPRIGSCLNHPPPPILTPPAACDASRPETRTRIKDITYYILMCNWYTSLPSLRAFRRRVCQVGNLQPATNAHRSRFLEQSIHCEVLGRSHAMLLS	hypothetical protein IF2G_04831 [Cordyceps javanica]
TQW07680.1	MIPVPTYQRHRCGRIHPLRVLLLFGAVTGLVKEDEGTKMMSKKNPSSLFSPSPLVPGCHRFRSAPHAPVILVAYHGIPFQARTMVQQPVPVSCKPEGAASLSTWIQLQLSLRVRGSGGDGRGGIDSPKTCQHR	hypothetical protein IF2G_04841 [Cordyceps javanica]
TQW07683.1	MHAPISKSLLDIIISVLRPVAANHPAILLPILATAQGGRGEGGGRATPANAVFTLALFSGASIIGNVIDHIAVHDFTHPARGWRRRRPCCSFLLHNLILALQPPLFAVRLYASTTNRPNASHPEPAPHADARPLLSSAFDAYFFCEPLTNSDRLDQPYRSSACWWCKQLMGLFSRQSDPPVCPKWTTRS	hypothetical protein IF2G_04844 [Cordyceps javanica]
TQW07687.1	MEEVSKMTPRPSHNGARVGVWIHSRYNGERRVPDFQGRGIDPFRSLADPLILKFDLMGNATDEDGVT	hypothetical protein IF2G_04848 [Cordyceps javanica]
TQW07688.1	MSQPRDSPDQLATSLPEALRMMCSTRSALEWICRALDHDWLCHPELCMSLIQIIHDSSPKWRAAIHQRSYGSCQRMLLINSPSLTLYRRRLPEQYP	hypothetical protein IF2G_04849 [Cordyceps javanica]
TQW07706.1	MSDRLFLPVLLSRWVTYTSRSHDTSQGISAQTEQIMPCRMNHYVENNVWGCDSLQVPRELLPDSFIQPLSRGGSTSLANQDAT	hypothetical protein IF2G_04867 [Cordyceps javanica]
TQW07717.1	MPARLFQGMVMSMTYTKTKKKKPYLCCSVVCRIPRMHRFHLTPHECSPSTSLYDSSLAHAEACRSTTVQTEEGHAWLWPFRRFPSSAHTSVGSSLVPGYTLNICI	hypothetical protein IF2G_04878 [Cordyceps javanica]
TQW07733.1	MLVSAFRAKTDSQNAQQVDLCFAAAAAYEGKNPSTCISAEMCMMCHCKRCHCGVCLQKYGSQLV	hypothetical protein IF2G_04894 [Cordyceps javanica]
TQW07742.1	MGVATLAMPVGACQGENCPELPGIHMLATRSGWIASHIQQASRLPRSILDLGSRLKQDWTPTLIMVITTRVHYYADHMEMKMDRRRAPLGAFALRPILSRLKIAGVERGGGKHWRMRHVRSACKQP	hypothetical protein IF2G_04903 [Cordyceps javanica]
TQW07743.1	MLASSARALPKGFLASLRNPQQTNLSTGGGIARHLRSSGSALSIAKSKIIRVRHATRQKANEFVFLVAVGAGVWLCAGSPPYLTSTCFAARQAMANEPASVLEG	hypothetical protein IF2G_04904 [Cordyceps javanica]
TQW07744.1	MLRVVGPCWPFDYLLSLLTRPLWSKSGHPSLATHGCTVSILVDLWVIPYAHPPQRTEYIFRLPSAHTARDAIMAWSRRHCKAAMLTACRRRSHPVAADLGPHSGASMHNLSQGKPTNQPTTDTLILTTVQRIPQHLRACAGPTWVAAVRVKQLLLVSHLKKGGREADMPSWPWLWPWPWASAIRRGSFLLRRAMAKTDWSTTQIDVLRME	hypothetical protein IF2G_04905 [Cordyceps javanica]
TQW07760.1	MGGARGPTLSWSATSIAVPRLSRAKAALANHAPGICWTCSAPLRECPSSDSDWARRNCPSKTYPSSPASQSVGNLIVAGPWGNNWRNSHVNRDFWHVGIGRLENEHYESDAVETGRRLLKLFESCARCGLRWQ	hypothetical protein IF2G_04921 [Cordyceps javanica]
TQW07770.1	MLPSQPRCTNPYSATLPRSHPAGAYFGSTQPCRRLTTVPSRLPNTLSDSIVMYSAYDVQPHSGL	hypothetical protein IF2G_04931 [Cordyceps javanica]
TQW07788.1	MPFMSSMNVTNECHQAGRKAYLGALSNSFLSFELTPCMTRKKSIFSASTLEYEKYATNRPGSLPSLSETTGLSRNSIVKAGCHTEYIKRRWNGAFLGSLST	hypothetical protein IF2G_04949 [Cordyceps javanica]
TQW07796.1	MRKSRQGIRSPDFSRCRCVTRQQWAGKLARKAGKDDDTDTAGKGSCQPDFAVFGAADHPHCWQEAVRSTQNGGRGD	hypothetical protein IF2G_04957 [Cordyceps javanica]
TQW07801.1	MRGQTALGPILRKHIFIFTAQDRLACLAIEPSHAPRATPPPPPQHQPATTNQPPPLPNLHAALFWGNSHCSTAPRGFGANLTSPAITLAQGGFAVPTSFDRVWPSHC	hypothetical protein IF2G_04962 [Cordyceps javanica]
TQW07812.1	MHLGLLPVLGSSALRHWHRHLASAKQYSALLGSLYKPQGYDASPEMEKRLTPSTPLGLG	hypothetical protein IF2G_04973 [Cordyceps javanica]
TQW07813.1	MEPCSSPPPPRRPSNSCASQGHQDDRDASRSALQLFRMAPAPLGLERMSLPPLAQVKRRPRWVPALGPRVGSGRNCSLHTTNTMRRWLAMHGHHPV	hypothetical protein IF2G_04974 [Cordyceps javanica]
TQW07823.1	MTFEPAMETPLRIQQYSLLLFERIDSPRLEPDRIGQTLGILKLTRDAAEADFEHLPATCNRTIRLPQQTWFEASPRQRWLLATCICMGSTAKVPSTTGADVAFHKHRETSRKNGCRPIIVAK	hypothetical protein IF2G_04984 [Cordyceps javanica]
TQW07828.1	MCNLTWARQNDPLHGCNGGLWRLGSGCNALDAPSERGYARPGSSQIVRSCPALWLAQVCQVTHQTPRGHASNVLGAPGAGGLVQ	hypothetical protein IF2G_04989 [Cordyceps javanica]
TQW07855.1	MIRAELGNETIPKYVLTSCKEYWAKSRLIYRPYNLPEHSTHRQSEVLDVHIACFRSTKYSSLRHLKYMAQNQPSSSSE	hypothetical protein IF2G_05016 [Cordyceps javanica]
TQW07862.1	MLHRSENHPSMDKQKQPPSSAPLRHPPTTEIRNTPSLPSSKWLGGWEGEKEKYSCPLSTWLRQGKTRASGADATRAWVPCHPLLLGGRELVSSSIPQHPSAPLSIQELLPAHPSMVPVSLLVDTRLRLISTGPVRQGKVLMGTKGAESVEKREVRVLCTWIRSSKCRDWTRASRIRCIYTRSIGQTLFLVRQVICLSALKPYHRLLLHRYATIFLDPHQRVSRPKAKPSMTAKEEVAASLPQQTTTTHPFPHLLHPPLPGDLLIWHALVDPSLRAYKNTCSQLSLRLCLIDLQSCKPENSSASSIHSFGGPPTANTDTAPPRSRREWTAGSLTRRTSVPAPSTAAVDVTSNPVPSLLTAASPFFPLSVTASSFSSVDTWRCCRCHYGQIQRGLARLTPC…	hypothetical protein IF2G_05023 [Cordyceps javanica]
TQW07870.1	MSLYIVRDSLPGSPCTDQNCSRKVLSLALDHLLGRGDAVGLDSLDVGVRLERGDGVLGVADTAWEGESIVSKLCPLWYYEFGGGGVQLPAPIRVQGSRHIVVGE	hypothetical protein IF2G_05031 [Cordyceps javanica]
TQW07893.1	MIADRAPPLRPNPWPLRESGLPEEKNGHADKLYEICSDSLGTKLRGSALAKNPSHQEEGHESWANQVYHSSTRQG	hypothetical protein IF2G_05054 [Cordyceps javanica]
TQW07914.1	MYSPLVYFTNDIKRKRQQFNLFCSRSVKVCPLARDGFLLEVFPPGAIDLHLGLLHGLDNLQLTLGNFNNLLDKAGTDLLLEFLDPDLLVSRQLRLILPLDLLVVLEGLALSPDDLVGALSRSADALKLAALVLLAIPLLNALIAGEMPGADYEDTVPELDGAGLAAVDAAASYAELLGIAAHQLPGFGRPRLVAGRRVLLDERQAMLGHGLDRLAVQRCRRQRL	hypothetical protein IF2G_05075 [Cordyceps javanica]
TQW07931.1	MRRRAGGFSLSLSIRGVGEKSAWDDDKVQQTRMYVSTYVFDLLRQWQTKSLRCSVGALGAVKVEAQQATGSSPSLFVKG	hypothetical protein IF2G_05092 [Cordyceps javanica]
TQW07974.1	MPKEERWRKPRESTLIEKRRTRAGTHPNEWRFTVSGKARSQCRRSRGPDCLALALAVSRCLPAIPLLATSQAQKQSSSCPGTRCPFDGNSDVGLGELQCKPCVWLAREEDVMVCRARAGEAGK	hypothetical protein IF2G_05135 [Cordyceps javanica]
TQW07981.1	MRNDVCHSPRTAERTTHPSGHPGEGCVCVRGGCRNSPSNASIFGPLSCNYQGSTPYRNLIRTVLSLGAPPRPHPPTYGMSEALLGRGGCDGGLEQRSMEGSRSAASREELSTLRNCRERLQIRAALVMENAAEQEACRAGNWGGARPYVLNVGCGLVGTKMAQWVQGHQAGGGGSLSWRSWERGVATIRRCLTIPSTFFRDICFCLVQACLKSPPRRPPTTSNWPCQAGACPPSTSGVGSTRRGRCFLHMRCSGALVGDLQDGEIVHLTAWLDVGVCVWSFRIGGG	hypothetical protein IF2G_03857 [Cordyceps javanica]
TQW08000.1	MNGEFYVSRHEQTAQAQGKRQSGEGRGRPDLGTRSRLEECILCMHGNFITVPARRFNPPAPAVLSVSSGAAVGPKKENMMQQVYRSGLLLISSGLRR	hypothetical protein IF2G_03876 [Cordyceps javanica]
TQW08020.1	MRRKGGGVSAIDSQDRLIVPIPAAVSGHCTTPSALYPWLGCLGRWRADAGHHSVGLGRYKTFGSGLLWADYMPNYLLVRSNGVLSGQPAAVDILLPCRRTCAVKVEEPQLLTHVGRDGIITLHSKKCDSNSRLLAKPLFFFFRSNAVVMIGLLHCCPHNPLACICRFLRMHHV	hypothetical protein IF2G_03896 [Cordyceps javanica]
TQW08024.1	MGLDKVKHIVLVLSGKGGVGKSSVTTQLALSLALAGHSVGILDIDLTGPSIPRMLSIESSKITQVPGGWSPVCVQAPRVPAPAAGRRGGVARAQEDGHDPAVLRGRAVARGGLPARRHAAGDVGRAHLAGRDAAAGRAAGAGVRGGGGDDAAGRGDGRRAQGAQLLRQDGHPRARRGGEHERLRLPALLRVHRHLRLRRRRGHGGRVPGQVPGGGAHGRPVHHAGGGREAAAVPRGDASQRAGHFESARQRGECGYRDADGKVQGLLAVSCV	cobQ/CobB/MinD/ParA nucleotide binding domain-containing protein [Cordyceps javanica]
TQW08026.1	MHLSEMICVAPPNQSCSGCCLVLASRAALWEACVRTIVTSRLAPPELGRGQIKRRITNVRHSALSYLVSKLQVVESALVFRVHHHMLESAHQLPIICEAATVCFWPVALQIFHSSLSFANWAQWQ	hypothetical protein IF2G_03902 [Cordyceps javanica]
TQW08027.1	MAKSSTRRLISLSRAQAPAGISNMRQANKRAKGASQRLGLFLYGTQSHGASVLFFCTTMPQRSEKKAV	hypothetical protein IF2G_03903 [Cordyceps javanica]
TQW08041.1	MGMAGAAPLHLFAIMSSSAHITSRAEGRRSILGTLGITHFFGSVYLIYA	hypothetical protein IF2G_03917 [Cordyceps javanica]
TQW08051.1	MGLRWGGGVAADSRDMATGSTVPSQCCNLKQKRGRGVTTLVRGVVLQNKWCMGESWVVLSPMVGGGSAVQTRLRPSGYEWPSTAGSQVF	hypothetical protein IF2G_03927 [Cordyceps javanica]
TQW08054.1	MARLRLLQDPDRDSGLVGPRAHRRSTVRVGTENTDRIRTHRSRVVSSSPCVDQPGACAHVQWGRESTRRGKLPKAPPLPEGDTIVNQQTRGMRMPEQQQFTQDSQEKPRPRTVMTS	hypothetical protein IF2G_03930 [Cordyceps javanica]
TQW08066.1	MFAGHEATFSFSVPAYWLFCHNLRFLRCFFSDTASLFNAPSPRLHSELKLWTEGFSFRGAEVLGAGIVLGEAILCTTTVIYLHAIFMTF	hypothetical protein IF2G_03942 [Cordyceps javanica]
TQW08068.1	MCRTYSVPGLESVGKQLGIMSHPRKRQEREREASCCKAATRSAGNSVVLQWHTPSLAHDWCKDTAFPPFTRLQLLATYLSACSASQVGRRLSHHSGERLTSCRGRGVPCASHG	hypothetical protein IF2G_03944 [Cordyceps javanica]
TQW08089.1	MDAAYQRQVVAEGHAVWVCENTYSAGRKSLPDDEYAHRANGSAAHSFMHSKYASPPYVQDVSLESGGGDNCPNVSEVHGVDWLSGASGT	hypothetical protein IF2G_03965 [Cordyceps javanica]
TQW08092.1	MNFDLPSRATFCITYQHYTAPCQMIIRVMFAIVCRAISTLSLAHNRSLHHCSGFHLIVRTVRPVSRHVFATARNKIKSLEEA	hypothetical protein IF2G_03968 [Cordyceps javanica]
TQW08112.1	MAARLCPTPHRRLRSITTFANHPARPRTPWTQRSQRQDSTRPSQKLTLRSRHALLPATVHWSPFSLSLPKRSATIRPSRNLSGRCCFRCRPVVPLGSFICSSICGAFSNMYPDHVPLSDLDRLRSCDGHAFLNLPAWPELGYPLWWTGA	hypothetical protein IF2G_03988 [Cordyceps javanica]
TQW08114.1	MRGGKKGAWMLVGWLGAEENVVGMKLRRKNGSGEKEKTTERRRRKKERERERKRGNKAKHMGSLHKKGQTYCALCNAVPMQSLVLSNLRGLIGHAA	hypothetical protein IF2G_03990 [Cordyceps javanica]
TQW08138.1	MTAVASVIVISIRRIQRGHLRVSYQYGGGRQPATFLQFGMKHPGDSEMPSPDIFHPLCYLFQQFAILASLSYGDVTTGTQ	hypothetical protein IF2G_04014 [Cordyceps javanica]
TQW08161.1	MYFVQKESQYIGTIQRVGREKAVHRPTVATRKASSLPNSPKNAIESYSLAASVVHHSLYCLLELPPVACQCRAASTPPMSG	hypothetical protein IF2G_04037 [Cordyceps javanica]
TQW08203.1	MQMVQCRGAGSSKMGANATTPIRQELADVGTCRQLCQRVPAEHVLTQYWP	hypothetical protein IF2G_04079 [Cordyceps javanica]
TQW08204.1	MSGRGRRPERLDRPSVLAGLGDFRVDGCRYAGSQAKSGSANCLTGQYSIPGWTGGKKIERPDGHDKRWCRKCGARAALGVGGRRKHLCQVTGELRGRTGRSRWVLDREMDEDGDETSKD	hypothetical protein IF2G_04080 [Cordyceps javanica]
TQW08244.1	MVARAVADALQRPPQRNKGGIAGRVPVACNTCCVCRSGVKGRCSDAAMQRCSDFSLVGLEGLMSQTKGLEWDGLNSTASLAQRFVNVVVVESSFQGGRAMHGTEAW	hypothetical protein IF2G_04120 [Cordyceps javanica]
TQW08247.1	MGRIEGSVTCPASAKKKMSERTQGSGVLGGKRERASIVKRCLFRIEKSDGGWGLAASTTSERLGQSDRTKKQSKCTRRASNECPTTAEKGSWVRGKLVPRGCGVDVASEGARFDESCQLGIDVSVRCGLGCVVGGTAVALQEPRRGSRIKWRRRPLLFLPSLPELSRMSWRLMRCVIVHRSTDSRAAVSPCLIAWWQAHVALVAHVPDGLLGKHCWQRLHSQCGGSETAASSSVHSTYQFDQNLVSVESFVRQWQQCLPRTTAREGMLDERHAVIIAQTTCSDGPFVILLVVTHRDGSSRLPNRWACCSQTPWPKLNAGQLHKWGSWQRPSILQKTGHCNIVEADEEKIEAGRETVQPGISTSAKAGCGVQLYPGRRAEAAAAAAARQTPVAFAPPRLP…	hypothetical protein IF2G_04123 [Cordyceps javanica]
TQW08271.1	MLRCNPVPGATGETGCIDCPGCRRKIRRAVTPVWSASLKLNIQSSPGGYDDLFNWSTHLPTLLLSRTRFAGYRLLFVLSSCQLPCLLSTKLSD	hypothetical protein IF2G_04147 [Cordyceps javanica]
TQW08272.1	MFTFIQLYRRPSSSPYLPFPSLSSPSSFHAVCRQDSVSCPEQGESKRNKTGHITLKRIPHCFYRIPQRDQTPPAQPARQPASTNFHPNYAAPQLPG	hypothetical protein IF2G_04148 [Cordyceps javanica]
TQW08288.1	MYSTSSCPQIIDGNSDTLPPLRSHCPTSPRTLGRYGQATSGPPGQMFMCRGKPVSVDFSRTGTGDYREKANNTPLPAHINDYVGETSKVQGPRGGQRPCAQRSTCNKGTGSESRQVDKFIAAGILEEGLAESDSP	hypothetical protein IF2G_04164 [Cordyceps javanica]
TQW08305.1	MCDRRLCATFGRGTSLAKRHQPLIPVPASPSRTCSTSAAHMTLYPLACLHSSLPLLSFTGSSHQSRLRQRR	hypothetical protein IF2G_04181 [Cordyceps javanica]
TQW08321.1	MSVPWASVPANDGRRRWSEPCPAGFTINRLVIGQDFCGFLVGGKPSLVAGVAGQGGREKDMSSAL	hypothetical protein IF2G_04197 [Cordyceps javanica]
TQW08332.1	MSRIKNSTENLQAEKQRRLPLAGQRDQQQSQTRRKPPHWRRCCPPPFPRNIGLSSGCEVRGGLEGGLPHSSTRCKPAMRGRRPSQYKKTGTRRCAVCD	hypothetical protein IF2G_04208 [Cordyceps javanica]
TQW08342.1	MAPIPFVGPWQELRSHPSVYIWGLVVYSGCSLWTAFAVDSAAEDCCIRLIWNGGFGLESKSCKMTLKRSENRWINPVAACGINFGNAHNESNVK	hypothetical protein IF2G_04218 [Cordyceps javanica]
TQW08348.1	MSSGSNEWPCFASEMCVRQDQEWRWRRLPHGQSSWNAHLAFVWDFGHEDRFIEKTALFHRDSSSFQPLSKQHQPHLGSCLSGATSTLRNSHVAPLPRTAAGGSLPFGLISSLFIFVLLKTSLSAAQIKDQKQCVVTGEAAHGNACFSRQSAVTQAVQRPKTQIDTERRMLQRYHAECR	hypothetical protein IF2G_04224 [Cordyceps javanica]
TQW08361.1	MAARLGWQWIFWILAILGGFCLALLIIALPETSRAVVGNGSVVPRGIYRSLIPISRVKRDKQGTNDNVKKKNVTFFNPLALLKILLSFRLSNVLICNGITYTVYCCIQASLSSLFIDVYGYHDIEAGLIYIPFGVACLFSILTWGKRLLSPKQASTDPAQEQSSIANMRAPPSTMELLWMKQSPSLTRPFRSKSHAFVAALYSSELRQWPHVVLALGAFNTDLNTHQSSTASAAANIVRCALAAAFLSILQIMIEHIGPGWCFTIFGLIMLLCGASLYWQITIGYQRRVREQIARPGRTQDGLRFRSHRPSLFELTWHHINMFAETAAAAFVILLGVDCGGGRGDPPSLDLFAAYLECKALFVGNPMAFSKQCSLRHLVSGWNLYAAVHSVPSWIGK	Major facilitator superfamily transporter [Cordyceps javanica]
TQW08365.1	MSLEDSCAAFLSSAQSCLVRVCVCACVRAFFARRIQRVPNNAKRGNTKVECPRIMMVVMGHRKPDYYSFLCRPRRATMKTVGATMPMVITDAPEPDSRAYS	hypothetical protein IF2G_04241 [Cordyceps javanica]
TQW08368.1	MAASIQGLRPAQSKEKVWVGWAGWAGWAAAGRWPLAGQAGFTPLPSGRQSRERMVPICQPFFFFFFFSFYPDSGRCH	hypothetical protein IF2G_04244 [Cordyceps javanica]
TQW08369.1	MQRPATSIMNESQEETRWGKKLLRPCLPIPCMAIPMAVCLGSHLQPSPPQYSGTCLPAFRLLRLLHYLLSTWLVLLGRTVRPLAPDTSVRATYISDRRCVVRYLPVCLRAYTYCRCPST	hypothetical protein IF2G_04245 [Cordyceps javanica]
TQW08370.1	MTTPPQRRALLWAWWLTVVVGQECLVRGHQKSTKKAPRPSSGPPRLGAASTLHDFPSTGIYRYPLPTSIPVHYPHPFMPTYRYTARRHSASQPAQSSRRLPALVGVVRW	hypothetical protein IF2G_04246 [Cordyceps javanica]
TQW08375.1	MDYCALAQQLFQSRSTTLPTAHEATVMPLLAPCGRDLTRVDLLIAKQSTDTPRSDTVTTRCCRSCQHTPSRPPSPATSTTHSLRLRRFFSGRHMKIIVQRPSATILRLCSWRATQKLPYPNKPFHTICAAEKNSASSL	hypothetical protein IF2G_04251 [Cordyceps javanica]
TQW08396.1	MTSKYETEFWFMSPLICPVMQNLPQAPACAMFGHTMIFSLTDQHRQAGWHMYQYMTCHTAGPAVLLRTLCDVLICS	hypothetical protein IF2G_04272 [Cordyceps javanica]
TQW08401.1	MSQTPIIVTHITTTTTASPLPPRPSLNDDYQIHDRDHGALQPLLRVRQARAPVPDPAAAQREDERNDRQHDTAAAHVNGAQLSRRQV	hypothetical protein IF2G_04277 [Cordyceps javanica]
TQW08410.1	MARKGTTTTNGIQLISGKEIYVTRKGEKEAKTTNHQTQHIGQPERFEGVTPSTCSICAYRQLVATQAAEPKGNRSDGKGQSLQATCQAKDHKPSNQSSGEQTADRACRGSLLAWADQTPPLCPSPRYSLLGSLSACLPW	hypothetical protein IF2G_04286 [Cordyceps javanica]
TQW08419.1	MCFMRWGYQRGENIFWKRSNVQSYGAGSKERLLSSSSCSLQISFPQSFDRLHSAQSASELHWMGCSKATCLCVPVDTAPPALALRQSACRDNKAHIPPSCFHESCCLYFGETPLFENGNVLKKDESPRTPFFNSACSIVNGRLYLSTLVRRLSIFSLSSRRTAKRLPTSSNMCPMFQFWENIG	hypothetical protein IF2G_04295 [Cordyceps javanica]
TQW08420.1	MGCACDLERSVETKPDPFSTCLPSTAVLGMHVNQQKRFPTSRDHRRVGSVEIWPDVNPPCSPRRARPTMASDMGKRAKASLPVYVLSTSTSS	hypothetical protein IF2G_04296 [Cordyceps javanica]
TQW08422.1	MNRGASIYHLVQQAPGPPMTCCGYTLLERILSKSVIRRNMLHRCGREGSATRPFLAESGTLYSVVLSWPSHLITFPFFLVPSKW	hypothetical protein IF2G_04298 [Cordyceps javanica]
TQW08424.1	MMCVDIPWIFLMSGLLDGDTLFFSSNFLTWFLVCGKVDDGEKWPTAWNILTLVNGDLTYAWDMEGFLFLFCMGGLVS	hypothetical protein IF2G_04300 [Cordyceps javanica]
TQW08432.1	MGEKLRLAMIHETALPLGLARFQCLRSLSFESHSILVASTGESLQLCLASLGQISFAIPMRVLAGHEILQTGLHSVWTMFVLHTQILLDTRSYRTSFLRCVSRHHCGDAGFGQRTVVARSRAETHTELPKGESRKQAVRTILGDTYRAIRHRIAFVSRVYVLCGRWLLSQPRHCILLAAATGHLECIINQYSTRTY	hypothetical protein IF2G_04308 [Cordyceps javanica]
TQW08437.1	MLTGQCCSRNLMNLALDENFERLQRRLSGDGRKSKGTDLGKSLAQEGEREAGQLWPGLSTTKRRGSSSRTRMRRMGCQRGI	hypothetical protein IF2G_04313 [Cordyceps javanica]
TQW08441.1	MGARHQCLARIVGSQMLHPRPITLERGPSSRDPPRPRIGVGLQTARVSRRSARGGSPKFGLFPSYNSKRRSVRGETRAYGIDGGQAHRVAKNKLRHYRRVNR	hypothetical protein IF2G_04317 [Cordyceps javanica]
TQW08442.1	MVKTWEDSFLTMSNRVLARWQPLMLVLRKPGGNITASAYGSCRLRLMLRTTAVPVAGIGVLGPSVAQ	hypothetical protein IF2G_04318 [Cordyceps javanica]
TQW08446.1	MPPAQQGWYGISNPLPKYLCQKRDAHETRRRWQDEDKTTKTTKAAILVTAQSRGCTIAARLIGGAMMSSWGLDTRSIISGSEKKRPCWAGGVAN	hypothetical protein IF2G_04322 [Cordyceps javanica]
TQW08464.1	MIVVGAAPMGCPVLTSAPGVLTCYEPLVWIMGLAGAVLVWLRGATVDFVVSSWPPNKQAS	hypothetical protein IF2G_04340 [Cordyceps javanica]
TQW08489.1	MKQGTRIKKTPTLCKISHRTQRIKEILRGKKKRSGRMTLCHTFPTPFLLRPTTGPWCPQPGAATSRRGRWPLSSVDAVAGTGPVARAATHEIRAAQRDPLLDRGDGSALDKDLGALAGPSQYGALKLGVAGGLVVFLLQQIVCPFRLAVGVAKLRELLHALPREPLDKLVDAARVLDAEPLLLGDGALGAERADVLQREADVGQGEVVGLRRGRVVAGRVVRRVLAQQQHVPRGQVRERVEHRGPRGVVARRAQDLQDRGPQQRVEKGWRCCHGARRRRRKLRVWEQRFGGIVEVFEPDEGVVRSLVAVAQQ	hypothetical protein IF2G_04365 [Cordyceps javanica]
TQW08493.1	MGISAGIKLGPTLATFYLLQYNSSRSNNLSAPLVNPQCVRRSENLPLRSTSNIPLIPLRLLENI	hypothetical protein IF2G_04369 [Cordyceps javanica]
TQW08501.1	MCFAAARRGNKASHGTTAPFLGGAITKPGPETPQDGAIAHHLFVEPPAPKSQVLAVSWGNGGATSAATGRSPARGGQHQTTPAKCSYTACDSLTESRAHCGPHPPPPPPPPPKGDIDKTDDDGVCVPRPSSADVGIMPYAIGLGSMGICNDALELGRGMMRPHTKGQ	hypothetical protein IF2G_04377 [Cordyceps javanica]
TQW08505.1	MVDPPGWGITQELDDIDTTTFVCTSFLPLFTAVLASCQLSASCLSAPETVFRNWQPHLLLPLPCLSLVYSHVLRRTLTYTAPPATASTSPTTSGTLASIRQIEYFGVEKRSLQYPPPSSSASSSSTLGLHTWVVSPSRCFIACHSCLDCASSIRAPLFTGDHSRRCFEH	hypothetical protein IF2G_04381 [Cordyceps javanica]
TQW08527.1	MGRVCVCGSVGSVHFDRLTLCYQTASSLFRVDSAVLIAPEETDLVRRRAKGRCLRWSCKPAHFASPFGCAWLRLSCSIVGPPACRDAQSRVAVDLASHETSILLRLGCTRRMSYILASGTSARIIRTEKGTRR	hypothetical protein IF2G_04403 [Cordyceps javanica]
TQW08532.1	MRTTDKHPSSTVESKHRPCKDVTYYRPPAGGLHSFLVLSGRSCPGIGLVVCVRSVVQA	hypothetical protein IF2G_04408 [Cordyceps javanica]
TQW08538.1	MLPCSLVHCASLFRSSSVPLPSRPPLHRPSIACLAPVPPLASWPRTGIIPREWQTRNHEESKNVTCASAPLSHLLTDSRVLLTSRAIHAHATCTRTSMQTSQGYGTVRPARSTSHFPI	hypothetical protein IF2G_04414 [Cordyceps javanica]
TQW08554.1	MEVYYKIVRFHVKTMTSPPTLVSSTSSTRPLVTGARYVECCLDNSPGQLPRWKWGV	hypothetical protein IF2G_04430 [Cordyceps javanica]
TQW08562.1	MTDPCKKTPAMMPSWNKAAAAPAQLFFFFGPGLPVISTCLLGDDDTGRNISKTDRETDLGGKREREKRERSKRGEREQVQLDPHQGHDSGNDDKRPTCGIENTDRVDGRGATWP	hypothetical protein IF2G_04438 [Cordyceps javanica]
TQW08577.1	MGPKEARPEYRVVVATARLPQQARDRHDAQRRLARALDFVAQKYKEGVPFFTKESFQTIVQQFDKCAETGASDQSISVPALDGTTVDFPFRTGKVYPYDYGDDDSICIM	hypothetical protein IF2G_04453 [Cordyceps javanica]
TQW08592.1	MEKGGPRRGVATGRDHQGQAGAREVRKQRKRTTQSAASKKGPVNCGLGHCESRRRRKTRADSKAKGDSSGRQYLPRSLGGSLVGVVPTGVWCPRRAAARTREVDQSRGEASMANYRMSLVEMMPFLLASAGSSRPAARSLGGGREVGKKQRRAR	hypothetical protein IF2G_04468 [Cordyceps javanica]
TQW08601.1	MSRFHPASQTQRYIASHSMAPPSSDQTCFHNLHGCRFLTNEMKGLTLFLIQMHSEYHGAESRQAHSQNGVFRDKDGYEGHDWADKQALIEEFIAW	hypothetical protein IF2G_04477 [Cordyceps javanica]
TQW08602.1	MDKSFVAGPWHIIGFTSYQHVAPRGHEAYVRCTRRAGIATWLSTTHYLNYQNNAHLSIPLALSKISPLFLFRFL	hypothetical protein IF2G_04478 [Cordyceps javanica]
TQW08606.1	MLISCQRTEHLIAERFGSPALFSHALAFPLFEACSPSFALPLLIISRQPFSTLFCSFLSPFTSFRIAFSASLHFCLQPLLRTKFTIAAANHNSSSSITTRFSTVHHPPPLHVATPPHPRQGGHQAAWRVPAKRSTEIGQPCPHKLGRQYRCLVYLPRFPSSNLGSAYKKNIASRGQCCLPVCRCQVPTYPPKYLFWCQSTNYLPTYGTN	hypothetical protein IF2G_04482 [Cordyceps javanica]
TQW08636.1	MIPISQSSSSEHSSTTANPAVALRVPDVCGGPDHRRNPSPDELQAHGVATDPFRSYTGPGKVWDGRYGESVADAAEAVRPGGETPA	hypothetical protein IF2G_03067 [Cordyceps javanica]
TQW08637.1	MAVDPEMGSRPRCFSPGSGFGAGEVVFVSDRLRSSEEDPAFSPGTFQRMEQEEQKNPFCIVSRRGEPAMPCARAFTPCPSIVLDSHLFVTSGVSVTERSLPDNGNCEQSTCRCTRRTAR	hypothetical protein IF2G_03068 [Cordyceps javanica]
TQW08639.1	MAGQAVERALPVFIICTNDKSVLRWSFQIASISSATPDGLRGCCSRKLPTPRQACAAVGVERLARASAILHSISVSVFSVSSDDAFGTDLLSGEFIRVGRVSEVVGLVEARAATQTCSSREDCKHECNPEPGQLKSDSRRMIRVTSRATLKR	hypothetical protein IF2G_03070 [Cordyceps javanica]
TQW08640.1	MGRGLISKGTLFHERRQGCNGRTGDEGVMANGLAGYVPSSAGQRGGLTMPTLAGLQQASPDAGAQRRSRGACGQVNQPVVQFNLYRVSNQDAVKPSTDAITELLQMQGVMDDG	hypothetical protein IF2G_03071 [Cordyceps javanica]
TQW08665.1	MYRWPNEAAARARPATCRRWRYGGVRTCLLVQLLTYYCRALSMIAPAPANRDIAHHAPASHLPSWSVSRGSFTNAALVVSFWVSSGK	hypothetical protein IF2G_03096 [Cordyceps javanica]
TQW08666.1	MGSWAGEGGNIRNGLVIGGSTRSGPGTGDQPRWRACCVWLASFNCNISKLQARHVAYRCRKQAALVPGQARNRGPASRVRLRTGDGEGQHPRLAELSKCRGEWGPERASNVWHALMRVEQVPVSRDDRKASLRRMHVSAVRQVMSRCARRQQQAARLCVYRGREAPT	hypothetical protein IF2G_03097 [Cordyceps javanica]
TQW08672.1	MGPTGNEALCLYRKRHHRHSKRQLTSLAFLEPSATACPSWQGAQQPHLAPFADESCAQSRHPRLRRPATLRVSSSLARTQYLKPFASPLAPGGSLSFHHPHFSVPLF	hypothetical protein IF2G_03103 [Cordyceps javanica]
TQW08677.1	METMRADRHLARGCRTCPSIAKRRRQVREASEENMLDGRLSSCDVVIDLAIVVWHRLLLAAMGGLSVANDKALDEPKAVVMSRGKMRFKH	hypothetical protein IF2G_03108 [Cordyceps javanica]
TQW08683.1	MKTAVLAIVLIFVVNLNLLQHMVWQVGPGEISSQALSIQAEQQCVCCGAYPAPVSHVRHDTITYMSKETMDRQEYQSYRHF	hypothetical protein IF2G_03114 [Cordyceps javanica]
TQW08711.1	MSPMTADKDYMTNFYEVFRKRCAARKAADQRNNESRSQNLPDGKDPKIDEPYKVHKTKIRRRRRPEKRRRRKPARELTIGEINETLHRIIGPRLDIVERKLANIRLEGDPRAAMFKEPGAGRDRRALKFVAKGHYPRRAEQGGVSAMQEPHSNRGAAHEESEISTQHGTMSYGEVEHARRETVADRGVGEEDFPGEK	hypothetical protein IF2G_03142 [Cordyceps javanica]
TQW08715.1	MAIAHGYRLGRGAPTTKNNSQNNSPALAQLRSPSGLLSMDRGSRRGPCLNGRHSPGSVRQTHQQAIKLVVGRDVVLLCSYEEHVAQDPCPASATLRRLCFDRRPAWYQTRMFAL	hypothetical protein IF2G_03146 [Cordyceps javanica]
TQW08716.1	MKGPLTPEMRTMCVACSGLAEAPQSPTGNGPTPSTVDVLLSWLLACYITGRIIILVVSPGRPVEHLCRFSLSSFVATGDTSPYLYLSAFLSRPTGFVLPQLRALWPG	hypothetical protein IF2G_03147 [Cordyceps javanica]
TQW08717.1	MGHLVPAGAVRCSGVHVSPGDLARLKGVWASVTLRWWGVGRDGLFLVVTALPSRKVVMVASWWQRTGESDGGARRAAKKTKERVY	hypothetical protein IF2G_03148 [Cordyceps javanica]
TQW08719.1	MLAHEISVRWMAAFAFGMRGVWTASVNGQIRATYTPQRSPPWPRLRSPAAEHARRSRRSGAWGRSTAWTACTLYTEVSMPIAGKWVSPYQSKQSPVVVAIV	hypothetical protein IF2G_03150 [Cordyceps javanica]
TQW08720.1	MASELEAVAVLRSVQVEATVETQTRISVHSSSTPFQAVDSYRGLTKSASHRLEVFFIRSTLTATEGVNLFAGAQGATPRFLRRNLARDETLTCFAARWYALPRRTWPEFVTGAWRVAACSSKFEHISSLCTFKECLLSQVVAFSPNLLPMRAFSRPWTHRTVCVGDWGTSVYQTARWANRHARQSPDLLGQRCSPKRGKAESTMLT	hypothetical protein IF2G_03151 [Cordyceps javanica]
TQW08721.1	MNPSSTPPATYLPTYLSRVCYLQNTTASPSLHHALFDRPLPLPLRPPLPLARRHPNLSSSSSRACPGLPVIPSAKVIRSRLLGTYPKGVSDVLEAHLAAE	hypothetical protein IF2G_03152 [Cordyceps javanica]
TQW08725.1	MPATTSVGGVGLLSTTLATHFGLPKVQALAPANKVGAKLQNWGAVNSVFAELTPYSNVLVARGCRLWLFGCVVTCQLILPLLIASPISQDCCWFASAHY	hypothetical protein IF2G_03156 [Cordyceps javanica]
TQW08730.1	MGSFGEELFHQAGEKKEAVVVQKGHSRFCVVQITYLPVEAGCGGGGRQDLALMGPKIGVAVAIRDEK	hypothetical protein IF2G_03161 [Cordyceps javanica]
TQW08734.1	MLHFAMCFIFFSLDKSCSKYSASANRKEGEGWVVHKFTQTEPTNKYDISKRNSQTSPKSGVGSRVILAPASAQPRANELQNFFMNPTPSLLLRTKCSACSALVSFQFPPGRRKGRWRERREKPFTSIPDPLSIARSMNEQRSLAVFSRHLEKKKGAVTCGATARLQQRTGSLFGLFQVSVCTHKSARL	hypothetical protein IF2G_03165 [Cordyceps javanica]
TQW08735.1	MYARWFGPWGCIRHWVAFLCPTIAWLGRSASIVRGYKHCFSGFFSPSFSLALVSIICAWFAFAIFDSFLDLLLTVANDIFPAALSRAGCTCLLNRSFIRQFDGTMNRARRSFFFNKTKKIQEIESCRQKKKQQQKKTWYSPLGLAATRKKIVLEPISTGSDRWDGCHALLELRAAEAEAAEAQNQAQCTMHTPPPLRLVVTLVLSVLILLIFTPTTNKITIHTPPFPGHPRHAHISSESLDTKYIFALVELPPLSLVSVP	hypothetical protein IF2G_03166 [Cordyceps javanica]
TQW08740.1	MYVCHVAGHERPLAGKRSRKSCAYMSTRPGKRPLRRPGSAWRSSLKYKLASCVVQKNTPIIAMGQYSRDGDRRMCLYIPVQFRQCSSCKPHRVLTQL	hypothetical protein IF2G_03171 [Cordyceps javanica]
TQW08744.1	MRSIDWFLQYLGASLPGREAYLHASVANCQIAECGVHGHVWIFPQYNAWFDKVLVCAIMRLATKALSLA	hypothetical protein IF2G_03175 [Cordyceps javanica]
TQW08747.1	MAYMGNPLAIRQHKVTRPREDVDLITHLQGGAPSQTSRDGAIADSCGNGLLAAEFLKIIYVKTPPSACFQMPVEDGLASIQIPMLCRGDNHLHSVPLILDRIEKQLCCAEDTETEWRPS	hypothetical protein IF2G_03178 [Cordyceps javanica]
TQW08750.1	MTGEKGEQKEICLRPKIRRIVPRPCNVLSSDSHSRQVNRIPRRAAALRKAIRAARSGYTSTESATDPSAQNISAMMATRNFDSLLKGSTANSCRQSAEQSRATAATAHSSRSRGTLQRKEAGSIEVGKTPQPTNPKAHEPRQRHQPYREPPLAGTPPHPTPPQQTQIASSAAEDVDPCLLEPRMICRMENMQ	hypothetical protein IF2G_03181 [Cordyceps javanica]
TQW08753.1	MPLPQFLVCPKTCFPLGGMAGRSYASDVNAAIARQPQHQRLVYMARESMPFHQRHLSTAGHARAKKKFRSSQR	hypothetical protein IF2G_03184 [Cordyceps javanica]
TQW08761.1	MSLRLVCLAATLDSLTEPESAAPCPVPVIPPPPLPSKLPPPASTLQPLHPLLALRDLHAGLAFLTTLPPTPLVVRSPVHPPIHSFSPGRIFCARQLFGCSVYPFASSALAVPTLDILARLLSGTLRVNPLSTTRRHRRSFSTRRLREPPSASQPLITGCWFWRTPISMTRAAVQPSPCSPQPTVIPLRGRV	hypothetical protein IF2G_03192 [Cordyceps javanica]
TQW08778.1	MSNFMTNAREVLLLDACVEAFAQPMIHQPHSSRLPKLKPCSVPTPYLCLSPTRLAVARNGIRRELVRISRRARVNDSLYGRCWPHHYP	hypothetical protein IF2G_03209 [Cordyceps javanica]
TQW08805.1	MPWWYVVVRLLGNAGSDSVVCVCRVLPVCLEELALPSSQANLHRCKRVTVVLGERFGGAQGRRAVPSTVGMSILSSYGYLLTWYLHIGQPSYFGSCRAQPTQAISIHSSPSIHLHPSISASFDFLPARTSHISTHYRVMTHLPMVPSRSSNADGND	hypothetical protein IF2G_03236 [Cordyceps javanica]
TQW08806.1	MEVVAVVVGVASLGIVIRRVRDEGNREEENKTARRGNRGGRFGSDNRNGEAVMSVCGV	hypothetical protein IF2G_03237 [Cordyceps javanica]
TQW08825.1	MPRSKVAFTNRRLEQPDGYLTEERKAQDPDQGFSTFFSETGTATLSLPHRNSVTSLTQRMPSLPFVEY	hypothetical protein IF2G_03256 [Cordyceps javanica]
TQW08826.1	MSGWGGEKERFWASRGSRARVWKRGSGGFRQVKSARRRLLQYPVWVAGVGERVVRPEGCTGKRASQRELPGTLPSCCRATGTSLAGGGNWARQGEPRGGGTWRGGCLGERGPKLSWPGSFWLVGLKQLVGPRLQYMRSRLMHFAVSRCTALYRAVHQRRIHSLQAAPEFPRGTLSSPPSIVHLLTFYFGLANQARFSQNQPPPAQGLHRYRKQGITKSTNMSFLSVQGSARDNATSTLDSVDM	hypothetical protein IF2G_03257 [Cordyceps javanica]
TQW08838.1	MHRPVCGAWTLETRDPFCLGMMGRGMAAQKGRHLSRGTSHHAVVVLLCASGMEGLFRSPHTVCDSLNRCTCKICFFYSALSKLASSINNMHGRSETCRDMGYTAGEGSAAAATGETREECCCCCCRSIWKENWAKWQTARESRGGRMEKKMVAYKAANQKRSEPVWCILLWSSALMAPSAGGVGGVFLLATPALSRVCIILPGIDMTPPGDGTLKLSLGLTSIIYDGGDVQFQGGQKATSAFFEKHDAT	hypothetical protein IF2G_03269 [Cordyceps javanica]
TQW08846.1	MAMPACCGQYCIGIRGNTEVKWGEVSGEAALYQVDRRRPRGINVLVRGMP	hypothetical protein IF2G_03277 [Cordyceps javanica]
TQW08851.1	MRPLSLLYNHNLPPPPSPPPPLPTSSTLPPPSTYRLFLSFLHLPQLDPCSTHCRFREKPVFFLGIASILASSLPSIYPLSLIANLVFSSSCPASRLLNTTSPPLLVPLHLFSFKWRSDTSP	hypothetical protein IF2G_03282 [Cordyceps javanica]
TQW08857.1	MLFPAHSSRNQHLFLLVLVFAPVARSSEFRGPVFFRLASRAQLETRTPSSTNMDSRPGDPFFSFLPVLLLGLLIVVSAKEHAICTPIDRLPVDPHANNLLLSRNSSLDSRDDLISFPHSAVLDGMLSCVHHASSALASGMAQSTLAIGYTMGQLAHWRSHCC	hypothetical protein IF2G_03288 [Cordyceps javanica]
TQW08858.1	MSIPTKLPTVEWPFFSASTKCASIPDVNTIYACYCFTVACSCISSNWHRQRHHGRIATRLLQHAHSTGRDNVCVLRYVASPAISISKRRASACTYLPHACRSHGDQSASFDQFAVADRSNRQGTTFDFGFALCRIVSYTLCNSKHWPFNAVALNATGLDLSHAALRY	hypothetical protein IF2G_03289 [Cordyceps javanica]
TQW08859.1	MRTVLRITHRKSCGFDDENNLLGGSFLACGIRGARKAAAFVSGVAGKPYLW	hypothetical protein IF2G_03290 [Cordyceps javanica]
TQW08881.1	MGSPSIKKRVRQVSYRYITAFVKAICRFVSTGSSCHPSSSTCRQTLPALV	hypothetical protein IF2G_03312 [Cordyceps javanica]
TQW08891.1	MYWSRRQYMEDGLIGKPAGKSETDELLDGTPQKLYQYKVYQYRADFPSNAHKYRVHRMIGRRPG	hypothetical protein IF2G_03322 [Cordyceps javanica]
TQW08900.1	MIGRLLMRTQIKLATQSVSGVLPFPASAQHAKQCYLVPFHLQVSKVKNKKNKMIDCAWALLHRFALFTAVPYCPRQSGRTSSLAVKVTAETRAHTMQSDQHLMFLPVFHHKVFFSVPACSNMMQSQLCSNSFLTVDRITWVTGSSPNGLRRHLVQREIAGCSGEPRSRLHRHFRTPPVASN	hypothetical protein IF2G_03331 [Cordyceps javanica]
TQW08905.1	MSPFSGRSANWCAALRSGMRCRSLAAVKHTPSVARDAQQPEHPQCLTSRKRSPVAKSTMQSTGTTSSGRTGVRRPPRRRTSGQVARDLQASASAGAGQRRRHCCQGEPQHERAECVDARRSR	hypothetical protein IF2G_03336 [Cordyceps javanica]
TQW08907.1	MMRNEKRQQQKALFVCTLREREARGLASGPNLGNSDDLSWGKSHSTSAQSGASACRLLGETAIDVAFISTNQYIYILDTGQGLSDID	hypothetical protein IF2G_03338 [Cordyceps javanica]
TQW08914.1	MQLLNLPRQKRSRLLACLTRMPIFKHVKENVSESRTQLCFISSLAARQGCQPENALIYQQARANAGNPEARSTIHRTLF	sicP binding domain-containing protein [Cordyceps javanica]
TQW08923.1	MNELRENHLNLIQIKGIFDQEHLVVTSRHLTGRVARGLSREADTLARVPNRSRVDVYVAPARRTCFADIIKVGRSRAAGSGVKECVLSCFRRAARAGVAAGFSVRRESSSRAAGDAVRESKSSSCREVARAGVTVKCGVTVEGTWICEVGRRREAAYAGVDTRIRVVAEVEKLACSVKWNRYGA	hypothetical protein IF2G_03354 [Cordyceps javanica]
TQW08930.1	MNRSKAISAQCLDKLAAATNESENNEVFSRRPRPQLSLFLAVFHLLTATLFFSLAFSTAGSQTQTRKKRTPTLAFRLNLKQSHHNA	hypothetical protein IF2G_03361 [Cordyceps javanica]
TQW08938.1	MLTSDTCHFACILVLPREVQITGKRLPWQSLPTFAVGSLRQTRMATEGGNMHVSQAEQDQVCVGSLRS	hypothetical protein IF2G_03369 [Cordyceps javanica]
TQW08950.1	MKSRLYLELNKIKIWEKRRTRSPIYIHQLLRSFRGGGFSRTHAIPEIVENFEPDSVPRRRPWRGGSASQPVSPRPKARESGRGKGKRKRLVIRARAQVSAKIPPSFIVGI	hypothetical protein IF2G_03381 [Cordyceps javanica]
TQW08965.1	MALLPGSSAHSWILSSQNRRVMVELASKTRVIPSLNRGAQREMPAWCVSCRATLAGIGSLPFPTCRCRAEDLALGVLWRGPCRQPRKKFTIQTAG	hypothetical protein IF2G_03396 [Cordyceps javanica]
TQW08968.1	MDLRYKQKPRQRHLLSGTTFRLISLLCMQHAYFFLVPDQRDCLGRSCFCSLPCLAAVEPWLIRAVQPLFPPGQLQPASLYKNVVGSIILAVRLGSDLPLFLFHLLLAQHAVRRSPAAESSPRSPTYIVLHKITEGSGHRME	hypothetical protein IF2G_03399 [Cordyceps javanica]
TQW08971.1	MHPFKQQRSDWHAFGRSAGKRQPASNLFSDTCILICTQTNQRVVDRTATKMKRGGRRASSKDILLKRPLKHLTESEKQKEESSFGPKNHTNN	hypothetical protein IF2G_03402 [Cordyceps javanica]
TQW08972.1	MPRPPLSPPPPPPPLPSESRSPAYRTEEGKFVASKARRRASTVPVGVKMHVFAPSTDQRNWP	hypothetical protein IF2G_03403 [Cordyceps javanica]
TQW08973.1	MRASYYAMELNVAFGKACDLDVPKRLISEQQSKVTTSLILTFEEGEPIACFQYISDECWTQIISTHDSIITTISTTTRTAAVPQLPIASIVPVTVILAEPLSAGLRRPIEQADYTSTTPGNRRSTPPLESRRRSSPLLHMTACPGEWRGGGRTIFNGEGANTIPE	hypothetical protein IF2G_03404 [Cordyceps javanica]
TQW08980.1	MPPPHLQFGQHVTCTGDDTKSSWTPMREGLYEFNKTRCISCGVHLLRARPSSFGVLSEYPGICANGRRRTSCTREDVGRWTLDGAQMPRCSSIGGLARPTTP	hypothetical protein IF2G_03411 [Cordyceps javanica]
TQW08990.1	MAFGKRESNGESRSYLLPTVPSLRIYCNFRWRRANFPWLTLGQATPDRGHGSTIWLVELAASHCSKRRNKASSDEQAQAVICTRITTIGLVRIYLIVAAKTKSAFRIAPFPWTNYLLVCDGPVDQSQLASPCHH	hypothetical protein IF2G_03421 [Cordyceps javanica]
TQW09000.1	MYPRAVLIRGCLSKQSLATPLADTLGCHDGDATLKNVSKDPASHLFVSTA	hypothetical protein IF2G_03431 [Cordyceps javanica]
TQW09006.1	MRFRKPLRAAVPADWGLMVRGWATFSRRRLGQVASKRRARVCLSKTAGQRAQGEMRSVAGRAKAWCLVSRHVRCNIGLGADKSGALLHRALGGDSWVACSDQYHCGLVVSGPWQGPWLA	hypothetical protein IF2G_03437 [Cordyceps javanica]
TQW09018.1	MTERLIAAKNDFSFKRLRRRMKKDQDGPAPQTAIHDHRGKHPLDGSDEIVVENGSRVSRKLEEMKTVAGCLSVR	hypothetical protein IF2G_03449 [Cordyceps javanica]
TQW09025.1	MRTYCNYSLDTAEFGACGGCSTDFSACPPTLMRMHQDGRSHECRAVDIPLERTLRRPGTSRWIEQRYSCL	hypothetical protein IF2G_03456 [Cordyceps javanica]
TQW09037.1	MVYSFTLCASVTLIAKELSKSAYTNSEPKRVDKLSLSLSALDSLLSIIPFSKSKNPQIQPSETALG	hypothetical protein IF2G_03468 [Cordyceps javanica]
TQW09056.1	MKCPSYPYVNRPVEPAAIYCLHRSEISERGSKVGLQRLPKGPLPQWPSQLVGGLARPHAFVLGRRCPRLTNWSSLERYAGVFGARAMGGRTRAAYAASCGVKRLFLTCTLLARLPKTTATLVDMRRNTRNEIPSELRISPPLFNNSAHFYW	hypothetical protein IF2G_03487 [Cordyceps javanica]
TQW09059.1	MSSQTQFLPNAGPGSESFPWETAPALEHCLEHGLAKSKMMLPLNVSIDTPMGETCNAAGEEAHLRHCRCRRRYLSKRPNGCRSGPFYQRCRRIDLHASGPWQMAYTMDVPENYASQMQWHGIARSRKTTMLVAAVLQPSSVFAWHLMC	hypothetical protein IF2G_03490 [Cordyceps javanica]
TQW09093.1	MRSIRNICTCATATLFQFCLGGRGEAKIILVGHLSTCPNLTPRAMPFRCMGAKTVHRCMSVPTAQRASLLLCKVSARVYMFYPLICYP	hypothetical protein IF2G_03524 [Cordyceps javanica]
TQW09094.1	MTAAAAASAASAATPHNYRTALNHAARQTDAGDVYDSWLLPSLFRCQCVHPATPISPDLQDSLASAHAAGQILQLNCRRILSTPFLLAGQSVGHAMFFGARRPSPAVARRRLQLPPFILENSAIRFRSTQLCDRSTQAPRTNSGQR	hypothetical protein IF2G_03525 [Cordyceps javanica]
TQW09095.1	MAGWLTRHPGCIESCIATKPVHHPPLLVLPSLDLDVLSSSSFFFLFPCLFSTSSFTLLPRLLLHRPSSAYLLLAAQYAHLGAGWLAGWLDCSPSQLDTWSPHKRILPCGALLIRPACLSDLLVSDTLVLCEPVVLWSSVLCYPLPSLAIIGCLLLPSTVFHTLVPARASAPSVPLSPTHAHSAFTVTGLPSNSRASYSVLFPTYLAGT	hypothetical protein IF2G_03526 [Cordyceps javanica]
TQW09097.1	MRSVRVMELEAKMPGHLCPSPPIVHRVPEVKGDRVLGSTCGLFARAVGQRTKDDTTTRCARARRAPTFSKPGDGDCGQRQVLKAQDKRAQVARRSERKGGWKLPQWSCCK	hypothetical protein IF2G_03528 [Cordyceps javanica]
TQW09102.1	MHTYPTATYPASRLNTARQEGREELSMINVFVFSSQCPTFLSLTLSVPLSPTSAMPFDQRNPRQLPWRPS	hypothetical protein IF2G_03533 [Cordyceps javanica]
TQW09105.1	MQLKMTLCKHRDTDRLLKLVEPPGSKHEDIITLGGVNAGMSAKIYIPLISLHVN	hypothetical protein IF2G_03536 [Cordyceps javanica]
TQW09118.1	MHCGRHMMPTVALHLVSELSCARRAVRTSNSLRGHALTHALTHALTHALTHSQTHAYIHALCDDESAPPRQRPCKCRREYRVLVLVERDGKGNACSIA	hypothetical protein IF2G_03549 [Cordyceps javanica]
TQW09119.1	MRNFIPLPECQWDGLQKTRTRLLLFFVACCLLVSLARALRVVCVSWGSRGSSPPA	hypothetical protein IF2G_03550 [Cordyceps javanica]
TQW09128.1	MAPRLICACHPSATECLPSLLPVCRYPYSVHIHVSIRNTYKASEDCCLLRSSARQAFFHAQS	hypothetical protein IF2G_03559 [Cordyceps javanica]
TQW09145.1	MFGRYPELGRGGSGRQVLASKESHLHRIHSTSAVHPQLRHRLQSPPVLKVPSHRRLFMRVPGRGCVLCSCRPMTWLIITTHASKPPSMVMGEQDLTVKCRIYFYRSAVALPARANGQGSRRENLDRSLIDLYRDRKLTGNSIKGTTVVLCRYPGGCLGK	hypothetical protein IF2G_03576 [Cordyceps javanica]
TQW09156.1	MRPKRRYIIKKEENENEKEKEKKLLPPTVIYPLPGRGPLIGQEVMVVATPYTHSHARTTAIFFFRHTWSCCLFSVCNEKTRPS	hypothetical protein IF2G_03587 [Cordyceps javanica]
TQW09157.1	MPHNCCRAIRLICARTCEGWRLRPECDILQLRYACGHQASSSGLNAPTPAHSAQGTAAYKFRIASVNPNLEDGIAVRAGELSTCQGTRINLPLLSDFAAHNAAPPGQRLALLLPCMYECCLQIRSALFGV	hypothetical protein IF2G_03588 [Cordyceps javanica]
TQW09159.1	MSYCNLLARLSSSKKEAFRKTIPHQAVRGADGVGAQWPARHTYFYSGHLPITAHSCWNDWRLTHCHSYGRI	hypothetical protein IF2G_03590 [Cordyceps javanica]
TQW09162.1	MARGERGGGERKACALRYNWLSQLEIFPVFVATSPTFLIQLKEVERRSLDGDSEAQPEGLYSRCNCGNGDGREARVRRGGRVSMAGEGLEEIKGKTELRTGSQSLIVLPDRSCEGPSLSE	hypothetical protein IF2G_03593 [Cordyceps javanica]
TQW09170.1	MMEEIGRGDRERVQPRSCSGEHSEGVRVRECARVCMSERVTVEREENRGSVRLGKCRGTEWYLRWFGWCAWCAWCARWWYRPRSGRVRPGEDKQWQTSSGEVAACTGRKAGSCHLLRRTEYRSLASNG	hypothetical protein IF2G_03601 [Cordyceps javanica]
TQW09171.1	MNTGTNSNRIMPFAPEWAGPVNGQPYCFGTKCQVEAPKWRRFNQALAAWPSGMSEHAEPVRGWLVSGGIEKTMTFCFGLLADNSTLHPSVSSNVPGAGTL	hypothetical protein IF2G_03602 [Cordyceps javanica]
TQW09172.1	MIRYFCLSTSPRRAARRAHVPVRPCHLEDELHADAPFAIGAKATMCIFYIKYHRSYAFVPGPSYPISYLLRNPFRMRVARSCELWLRRAIKHQHNCKVSLQQRNKSPSWQP	hypothetical protein IF2G_03603 [Cordyceps javanica]
TQW09186.1	MQPSLQHRRALERLHECNPTPPPLVITGTDSSTPYPVSPYIHTYGRKTGNLGSRAPVARPQHHLTLRRGRAGSLPDLARLAVLPSRVPGDPPTSNWLSQWHCPCARETRPSSTAPSRLL	hypothetical protein IF2G_03617 [Cordyceps javanica]
TQW09187.1	MRQRNGVELVARSMRPSSPAIMLWLVYGVHYNVIIQSILLEVELLKAIQSFDRRIANETQEESYLYGATGCLANVPFSSAHPCKPLGATLRHGQGTIRRAEAASPEPD	hypothetical protein IF2G_03618 [Cordyceps javanica]
TQW09190.1	MGRRFGARMRSRRRSRWRRTRGRTRARTRARTRKTDGGDSLRVFRTGPCPALFNSWCAIDPSIPSCPSAVPCLLARLGQIIGFSVPARPIEGLQSPKLDAAKVTSYLRSATGRHEYLPMSEFYMATEVLGLFCAVRRPVG	hypothetical protein IF2G_03621 [Cordyceps javanica]
TQW09193.1	MVSDGQFFALVTDGGVRLVREEGETGSFSRVRQAVGGADRYGEVMRWVGMKPIEARDGCKPGWERMENSLLVLRFEG	hypothetical protein IF2G_03624 [Cordyceps javanica]
TQW09194.1	MTNKARIAPLQLVIFARLNMRQHQRTLLALRLFPAAGLGSWEYTARSNN	hypothetical protein IF2G_03625 [Cordyceps javanica]
TQW09200.1	MENLAFLGFFFGGRISLARSSRKQKNCIILWIFVFPLFNDTTTITTTTTTTTTTTTGKLDSNSLVHLTAHNS	hypothetical protein IF2G_03631 [Cordyceps javanica]
TQW09223.1	MAKSKSHSFRKKKQGKEKEGSLAKAARGTGRYGRLVDGPGRRPKSERGALAQDPGQRLRGPLLRWAARGQKKKKERASGRESGLGCGLWGALVPETPANTCIVPLHPSHFLCPRNRAIRELLLVASSFIPCRHVSVTFGGGGGGREKLPNMKATLTLETDDGANLIKDDDETVTKSDFLQPILLRPFYQ	hypothetical protein IF2G_03654 [Cordyceps javanica]
TQW09225.1	MTRTKCFEQVGMDPLGKFTIGKGMLKVTRLRERVYILLYALLCSCRLAPSDFILDLFFCLF	hypothetical protein IF2G_03656 [Cordyceps javanica]
TQW09227.1	MPHDAYTLRASGFTGEWEPSAAAAAAAARSLVSFALPIGLQGHDNGAAALLVMQGGCGQPFFARLQASPDPLPAGAHVHAARFKSPDSGGDDDGNGDGTMATRQVHYIHFT	hypothetical protein IF2G_03658 [Cordyceps javanica]
TQW09246.1	MLQRRPSWMATKSGSNGVVSCSQGQRGGNGWVGQAGDATRRAAGQRAAGSQLMSEMTLCGVSSGCATMAGQLLGRIDGQAGVGWRAPWLWIFFFWLVRGSRRCRSGCLCRDDGDDEGCAGSEQSGAPEVGTAESVDNAVERYTRKPFFSSGRASIFSKSSAAVRRSLSLSRKREKKKTRQKAELVGVWGWRETCRPHGDGGGGGKRGSCVAGEEVGGSVIAQTLTTLIQALYLLHL	hypothetical protein IF2G_03677 [Cordyceps javanica]
TQW09264.1	MTGLVGGRQPVVSLGSGGCYARCVVGCRGLARGAAEQSWAPLGWLSMVIVRLTKCHACRRGSGKTGCGFSLPHDTVAVAIVVVSSRAGSSLGELVSTESSSWRGVVGKVVGHG	hypothetical protein IF2G_03695 [Cordyceps javanica]
TQW09271.1	MLAMPSNGLHRRLYFVYALVGLRLLGKSGLFMSVKDVTNDELRGCCLPTVVGSLAGQSRHLKYYKSP	hypothetical protein IF2G_03702 [Cordyceps javanica]
TQW09278.1	MRRTMTTVPSAMGRLLLQHHTIGKRMPLPPRKSLGYEAPRYNSCFHFLSAQTATGEDVRLFHWNSLQSSDRKAVWLKCHSVAENQ	hypothetical protein IF2G_03709 [Cordyceps javanica]
TQW09282.1	MSLSMLGILPSRSVVRKQMFWVQQIRFTSTNKKPNHSFLDSTLYQWAIVTFKSPNFGPLILTMWKRV	hypothetical protein IF2G_03713 [Cordyceps javanica]
TQW09285.1	MANNKECERILDEVRLRQSGAGVAGMMVGVLACHPTPGHSIGSHFTYCDILARYEYKIDHLFASKLCKSRAQHLKSSSVWRADNQRSQSGVADTHSRPCLPVLAHTIVLRFDRQPIGQGPRGKKEEEKESLKPTDKLAAAASPLEFCFSGFSWGIRRDELVGNGGALSCATQQPDTHKHNHARLWRIVPHSRAVGELCALLELISVSV	hypothetical protein IF2G_03716 [Cordyceps javanica]
TQW09302.1	MKCLVVLYVISFYAHDVVWVALRFVAAIAGSLAASPSTALFARPLYTNLSRLECPGRRGTG	hypothetical protein IF2G_03733 [Cordyceps javanica]
TQW09324.1	MQHPFMQGFNSSPPCQLASSPQLAAIRFPPSDHALWVNKTKWIEKCRLVSEAIIRRYALVCPDSRFAMSSSVPAPPHVNTASPLNAPCTEAMVGSRRVVPGQQTRENKARVILDAVEFSKLRSGRHDVTARPHTVPTSKLCPPRFALKVPEWTLEFFNLTVRGIERDANWSLHSLPAVVTPSASAGHGSNTLQFDEVGDRTTQGIVSGTQQRIRGRLRPRMDRGRQAGHQPSFGCNLDPS	hypothetical protein IF2G_03755 [Cordyceps javanica]
TQW09329.1	MQCGWHSWSRPRASPGELPPSMSCGGAAAARLRSQPAAAHSHPVPPAESL	hypothetical protein IF2G_03760 [Cordyceps javanica]
TQW09337.1	MRGSRPVHANSGSDTYPSPQECLLCLRDLKHTPNNQSTAQATFVYLKYRFLMFPTISLHAHQKMSSAPVLLRRLSFGSSMCSFDTFILPHDPAASHRERAQVPFSSLSFSNGSCSRSSS	hypothetical protein IF2G_03768 [Cordyceps javanica]
TQW09338.1	MDRIVSRVVRESRPSYRSPSCFTTATSKDYETHFGKSNKAVHAGPKFPAAFRLMLPHCLSCTDSARNIGRVWWRIARKRAGLGKSRNVLVVKDGFHGTGYLGCRMPDCSVTQIRLCSDRVKLHGRSFFLCRSTGAGASNPRVIFQRCTDSWFEVLLGQNCSSIFFLVSFWFLVRTIARSVRR	hypothetical protein IF2G_03769 [Cordyceps javanica]
TQW09358.1	MAAPASVGGIQRAYAAEMTLGETAQLLMPEGSGSFVGVVTNWAETAQCRVLLGNVAGKEPRTGDEASIASEPTYRNQELSIQAWTEGRGRFVEGWCGLWQVKDGCDEGMPATEG	hypothetical protein IF2G_03789 [Cordyceps javanica]
TQW09369.1	MTASLGVSHDEKPVSDSLYMSLSVETLILALYSLEGKKLVGLQKKTDFYHIIPFLSLSLSPSSPSLQTINAPTTPPSPHMALYALYHVSLQNPTRDADCRDCPQQLNAALSL	hypothetical protein IF2G_03800 [Cordyceps javanica]
TQW09371.1	MAAEPHQVTVECTNAVLEIVIRSFTRLHFFHDMPCHRDVFINGSSLVAVAIKELACQTPAFSSHLQLQVSIVYSTPPKVYNSLKLNVLAIPTTWVGDCLNSAESAFSPCTLRPVILKDYSCCNHNYLQPVQPRKLNFASAFSCIRAATNAASGKIKMKNIKKK	hypothetical protein IF2G_03802 [Cordyceps javanica]
TQW09379.1	MSCLPLSLIIYNFNKYSVLFKGENPALLALPPLPSPSICLFPRAASAIMGIQLGFFAAAHKYWSCTSSINALLPFLFSPHHDACPPTFLPPHSSISPDFLPAARPAGLCGVHFATRRALSLFPSRLTLLSGRPAEYHRP	hypothetical protein IF2G_03810 [Cordyceps javanica]
TQW09385.1	MALFTPRRRMGRVTFRTSLSNVAALKGCLPGLGSGPGSPLTAREPLPLPDAESHVCEQDGCCSAMTRPNSSFAKKSVPHFPSSIAIMERHRAKPLRVQSRTGGTPSLPSSMTARPARGRTPSPSAGRRSWSSSQVLDGGEVHVWPAGRCAP	hypothetical protein IF2G_03816 [Cordyceps javanica]
TQW09386.1	MIIPLSRISYGLGSTQLAVTWSFRGSYVCWLPRSSHHAQMATLSWKAETVLLPTVWLLRNGWLHSLARNGI	hypothetical protein IF2G_03817 [Cordyceps javanica]
TQW09391.1	MTWLMGEACLTPLVKAFHHVAPESRTATKVYASPLTSRNFRLKNSILLRPIGRRSVTLHQHEQPILIRL	hypothetical protein IF2G_03822 [Cordyceps javanica]
TQW09412.1	MARLTHGPSPRVRIETGVTPGRYRVRAESVRPTVAVDMSLNDSLQGRAITFAPQLLALRMHHRQGGPKHREPRTENPAEVESHISKHEAEGWHNQWQSGRRNAAIRSRIYLWSLAVNGGISAKLEAWHSSDGPSTRAANADLRRLKWCRYGSGARLFGEGWPG	hypothetical protein IF2G_03843 [Cordyceps javanica]
TQW09422.1	MPLSTEAVIAIVTAVLAVPPVLVIVLRCTMYVRATGHNRDGLRIIFQLPSPGSASSSDLPSSETDAIERGQAYALQLQFSPANA	hypothetical protein IF2G_02212 [Cordyceps javanica]
TQW09429.1	MYHSFPPCICLYCIIFIPLHSDACDIKLLYVSIVTAFFFLLLTTRLFPLYTCPFLQVACLLVLQVARHAVVLAHAHDDGAPFHALEAEVLGLELRDGVRRQLHLKRPPAAAAAAARHGRPPEQQLADGVRLGAQQRRAAKLVPDHLLRVLREAVRKLLERRVHGALKGLLVGRRGRLGRVRVLDPRVGRQRHVGRLGLQRLVVGVGEVQRRVRRGLLRRGGPCLDGRRPHGVCFGGVYGEGLVGVAAAAAAGWEENGFAPNGLLPAAPPGEELNGFAFDENGFAPAEADGPPPKRASPSLGLGGSGSLGFSAFFASSSFFFLFSAASAAAEPSSSHTRTPRTARMLPSRRLQLARLQAKTYIRRSWLGNRSGSSPLSCSRSTIRSLQILHRASAAEGGL…	hypothetical protein IF2G_02219 [Cordyceps javanica]
TQW09432.1	MRAMQPSGVYLAVFTATVLSFFDSCGERCKVLVARSLGLCIDFFYRTFHRLLRAISFILLKASCCAARGAQSRWISHSATHQHPSPNDQRHLK	hypothetical protein IF2G_02222 [Cordyceps javanica]
TQW09442.1	MNGRDGWMTRLLTGLLAQNHHPHQAASSAIRNSRPCPMTRYIHEGGWSSLSVPNRRGTGRERGLQNGQEEARLRMKRESEHSKAPEHIEKTERERERCGMVDIKPATCRVSHHDELCGFGLAWLGLACRFVSSHHQQYRNDWQTGLQHNTAQQHFLLHSTVLHRPFENRTMGIVICVYRYLLFIIVNFKKIWQTTHDSSTKASAETKRAVQDFLMLSSSASLSLSLVPSPV	hypothetical protein IF2G_02232 [Cordyceps javanica]
TQW09443.1	MTVGSPTNGGGVGPEVAMLSNFPASRPCLAARPFQRVALPHVAPVQRLGNQYHRY	hypothetical protein IF2G_02233 [Cordyceps javanica]
TQW09449.1	MASIVMLRWRRGCSEERFSTSRLDHQSETTDNLPSSIFAIPTWSGTYDFSLHLWRFGTARKYITVDEALWGAGAFGYERQASIWYQLGLTMATLRRAFVVGQDSGSPVLGENHGGKRPCFSDAPLAAHPLPWLRRWTRSLRLQRQLEPLPTVGGVLISPARLLSSFVPPPLPYSLARVCFDS	hypothetical protein IF2G_02239 [Cordyceps javanica]
TQW09451.1	MTTQLKKKLRRTLFLSSFWLRSGLSANQSSRFLRPQQGPPPSPVGTRRRTLMAMGAPATHAKPGSWFSPPLQCIGGASASLSLCLSLSRLGGGDDGGGGLWVGDATVYGAAYNPAPSWRAPSLVEAIRGRQGGKAGGGQKKTERKTETTRPENCETR	hypothetical protein IF2G_02241 [Cordyceps javanica]
TQW09457.1	MPMGRRRSRQREGISRISQTRPCGDSTHRMVENENEPSHKVGVLGSYTSGAGFAFFEDRASITIESGAGTT	hypothetical protein IF2G_02247 [Cordyceps javanica]
TQW09463.1	MPATSTMKRDRHGLSEAAAGASDLCGLQTSTKKPSIFSVTDNCMTGFQPFAYPETNALCSTQSGPLSVLCHFTTVMMIEFAFSL	hypothetical protein IF2G_02253 [Cordyceps javanica]
TQW09464.1	MAGTWHKGVRLHNVERCLFWGGSSNKNLPGPDCRSPRRAMGENSWPRVPREEVMTAAAAFYSCQRRTLLGTLLGHEVASVGKWAGFIDLAVTRKKQPLHNEHEKLSHT	hypothetical protein IF2G_02254 [Cordyceps javanica]
TQW09466.1	MLDKYGASKPRAPCQCEAGLLHKTRGDLFGAARTWDFLRNIGQRASRVKQTKMLIAIDHGLLPRLGERFAVVAFSSRVVGNLDFPTDRASRGVR	hypothetical protein IF2G_02256 [Cordyceps javanica]
TQW09472.1	MDLASTGALLKDYFHKSAVLVPLGERTCFKPTKNCVRKGQPSLRTKHTLRPLLSRNIGDGQMKNIEKLFQETVESPNRSQDEQLTILILKKVLLLWYLRDTIQVMVAAQRQRYIETWKTEAVAAPITCRFSVRNEW	hypothetical protein IF2G_02262 [Cordyceps javanica]
TQW09484.1	MYDSLSGMSINYWTVPARLPTTPGSLDWSRVAPLKSHEPPGKQARPLVDMAIRVVAKNIGHVSKELLEPIPARVLWRLWRFLEARFVHPISPPYTALRSRHHHTPPYLSFR	hypothetical protein IF2G_02274 [Cordyceps javanica]
TQW09502.1	MCSVRCRCRTFRREGKVSLLSLELLRCENSVCHFVFSSVHGLFEYGEYESYFCRSRAKSARHFLVV	hypothetical protein IF2G_02292 [Cordyceps javanica]
TQW09506.1	MYGLHKTRDGCPKTELYLLIGLAQSKMHNLARVALHIIQDTTSRVAPRQCGGMRSDQAFIDLSV	hypothetical protein IF2G_02296 [Cordyceps javanica]
TQW09518.1	MASARIRFLTSFLSSSKSMVVGLDEPGSGRLSHSHESHCRMAASERTEPDSHLRIRRFGDGDSEHCIIVPSCVVAQYIRCSPGATAACRLCTRIPGAAFVIAVLNEFSIVSFSMTFF	hypothetical protein IF2G_02308 [Cordyceps javanica]
TQW09545.1	MRRDCAQYSPYSATSCKYCDLVSMFVMYSCGVSCPRLMLKAVVSVNATLRSWERPWSVWSCRDVKGSVDLHLLHLWRSTGQYLVQAATGGHCVDMYLLREAK	hypothetical protein IF2G_02335 [Cordyceps javanica]
TQW09549.1	MASTTYEVHLVILDLCSYRPPLSSPKEKPQKYPRGQNLRPCDPNNPDDPDLSTTKWPTARCQPFPLTHLGKTHKVRNEISRLDDLVALQSAACLTATDRYLAKGAWESITAKPTFDPQLPRTDKQVDDRLFETLGALSTQETGIVPIQCSDGHVTELPKFKPIKTTYGCVTLELLAPDWLMHDTVLYGVSINRYMRLAISGLQLALSLQVYQGNSTSRPLVNAPQVSNRIWR	hypothetical protein IF2G_02339 [Cordyceps javanica]
TQW09574.1	MSKDYRVHTSHGLGNPGLAAHDWVPYCSEIELHRETQAATLVDRPLQKTALDTTTSTGSQVPGCWDVDSRTARLSPVSTVYTLLFSPFTEY	hypothetical protein IF2G_02364 [Cordyceps javanica]
TQW09597.1	MLARGCCKRGANDAAEGERFNAVWMKDRRMWLIMSIFYVLRKAAAANPIRQLQSESRMDTDGEAGPAGEVGVTKGVRLVTSLQTTVVSESLTDAAGISSLGYLNRAIININVWKLALSL	hypothetical protein IF2G_02387 [Cordyceps javanica]
TQW09635.1	MEYLLFRCMLCSLWAELNARQWVDFDGRTPVSTQLDALFACPYATLPFFTCLPGLGLRRGHRCTGCIITSTIMSRTVAQVFECVPSSCMAA	hypothetical protein IF2G_02425 [Cordyceps javanica]
TQW09643.1	MAVEGETKGLLRKDENAWVKCSLTDWWKDSRDSRDSTLPVLQLGGGAKRPRAAANGVDGRRGDDELRLRGKLSSPNHAHCLPRWLCDATTAPLQPSPCGMSRGGLRCDRQAGRTAGRTGDGECDDNEP	hypothetical protein IF2G_02433 [Cordyceps javanica]
TQW09657.1	MALSVCLCGGRTKHCRLLRDLAGLAAEPTKLGWLAGLVICKVDHLTPWVRSRLARKDDEFACLSGQNRVKKARKRKRTSTKVRNGQLDESSRGRKLILLSVKRQYHAAVIRMGQRTGCIEECRWAR	hypothetical protein IF2G_02447 [Cordyceps javanica]
TQW09659.1	MHAWVRCSGTGWLARGREEKGNAWVDASTFVDACVFCNLGLSRRRLSIPNKEILWKLPFRPQIRSTGACACVRVSDSGRHSHTVNNGAATAVAPLLVKRLGPCRTHVHRHGSWPLLGVKNGYRQMAWDRVHE	hypothetical protein IF2G_02449 [Cordyceps javanica]
TQW09660.1	MFSLLYTCVLVKSHLSIPYCSALPNYRHSLVKDGSRSQRRSVQAVWDYDNRHGK	hypothetical protein IF2G_02450 [Cordyceps javanica]
TQW09663.1	MSIGNTTTNAITTEPLSALSLFDPFLLQDGFQYTCLLFLRSFLSRQSPVSLLPTASIAYASAHRVYHTHGARLPASPLSPSF	hypothetical protein IF2G_02453 [Cordyceps javanica]
TQW09677.1	MRPGRNGKFNSSRHGLAIKGHAEGSKTDDAREAKEGGLPSNTGLYIVCISTVLVLSSFGLSLFGPG	hypothetical protein IF2G_02467 [Cordyceps javanica]
TQW09680.1	MSGLASPVVRKRPRDRHSKVPGETTPADGPGSSLFPTCIGVAASCSKMRLIPGFSAADQG	hypothetical protein IF2G_02470 [Cordyceps javanica]
TQW09683.1	MTSSQSAASLKWSKSVRVLPSIGRKERVQQGSDQSVGPATPKMHFLDDGVSRTAMAAGRALDMDGKLKRRDPRRVPGLWALGGLLLLSSPLSKAFFSRTVLQLTSLSINKKPDLLDSLLPFTHRLAYHHHHIHTQQTIIRTSTHTHPPTPERLSPGAIPPDYYSHPAICLSPIPEKQGFPLCRSR	hypothetical protein IF2G_02473 [Cordyceps javanica]
TQW09686.1	MFFPPLDQPIAYRDAKSGCTVLSRGKRPDGLMAGPRRGFDVGLAPPARMDEKAKV	hypothetical protein IF2G_02476 [Cordyceps javanica]
TQW09693.1	MDDALMREEGSSWPTCPARARFSNAHSFHSQRDTKSLPCSESRATLSAPLDCSLVVSVRCCTSRERTILALRVCCSCKLQLCRCVSVGGLYQPSVTNALRLTII	hypothetical protein IF2G_02483 [Cordyceps javanica]
TQW09713.1	MLTAQAELGTTHQSRPCRIAVKYLGVLSCRGKACSFYVTELAEVVLVASKRFICNSHLYAASFNYAFSILSSAISVRTYLLLEMHLVAVLQSH	hypothetical protein IF2G_02503 [Cordyceps javanica]
TQW09717.1	MTPLLERQKAGPGVPDCLVIPTPFTSNDQSPGMSKARFNCVASNIKSAPSSSSPVAGMSSHEAENKLHHLPPPGGEA	hypothetical protein IF2G_02507 [Cordyceps javanica]
TQW09719.1	MYCLAGPPRAGPPLTPQPRRSSRPGPTSTANTNIAFTLVLFWLQFPSILICIVADAWQKRKVTSRGRNIDCYAPKMANRGRLGNYNGSQDFTVPMRRDRTPACSFRAAHLSETAQNPLSDPGVEVQVATCLIWESMGQLGTVLWNSK	hypothetical protein IF2G_02509 [Cordyceps javanica]
TQW09721.1	MFDPALLLTLVRQVLLVEPNGIVEGHDATWQAKKPDEVSYFGRETTEEMKGYRRAAFSHDWQRTTFSPDNLVGNWLGKARDDAADTGYGRIGERSDVDTTTRKA	hypothetical protein IF2G_02511 [Cordyceps javanica]
TQW09722.1	MRGQWSGRFGATCWDWLRRPSTTAGHRFRRHHGTRRWRLMAPPTTSSIVASLAGSTPRASARPPSI	hypothetical protein IF2G_02512 [Cordyceps javanica]
TQW09723.1	MRCVAFGGGIPGGAGRLIRARLAGWLASGGDGGVGCCWWWYCASHFGHGSVPQPRSLHTQLKIRNYSLFCVAVVPIESHKRNRRRRGRGWLWWSWSRLTKMLI	hypothetical protein IF2G_02513 [Cordyceps javanica]
TQW09731.1	MFMLPGSNALAGGQARDELGHDVSFDAGTDTTSSFDYEATLAFVESEYNKVRRAGVDARKVMSSTKKCTTPGVRWSSPTQLLIWRSSGYRSEIRRDPDFSLGYGRTCQAIEHFCFIYHLQLATSGSGKRESGQKRHAKASWCYLKFSTIEEEMGSVLSMMNTRRHEWQRVGAVVMETNTHRSGWSEQRCAPYIHFREQLYLLIVAVETRAGAIDMLELMIGCVL	hypothetical protein IF2G_02521 [Cordyceps javanica]
TQW09736.1	MLVVPLTRAAFPVLPRQPWNWNLEPVTAWIFYINLFQYLTRQVESSANDSAPSVAVPGHLTTKEAHSMKEILNSCIPTKRLSLTIPPLLLRWFRPRTITVGHLCWISEDAEWQAVPGGRRVPGANHARL	hypothetical protein IF2G_02526 [Cordyceps javanica]
TQW09753.1	MKMDHCRYSYGHYEIVICTLYSTNSTKHAPWRQEGNPCGFMQWVRNRWSPFRGIIERALWLDNHAKQPPRRLTDHRAGAPAQPYTSPATEADRGRPGLIQDLGWAELVESDDGS	hypothetical protein IF2G_02543 [Cordyceps javanica]
TQW09754.1	MELASKSSRSSETRRRSKLGPPVVKRREPLARLKKLFPTARVSSDDTQVNREYGGNAPAEKCRPHV	hypothetical protein IF2G_02544 [Cordyceps javanica]
TQW09760.1	MSRIVRVWPETWNVIELACKEPRAQQRTSIKEWNQRAEPERSVSVFPAATFPFGRE	hypothetical protein IF2G_02550 [Cordyceps javanica]
TQW09766.1	MHALTADIVAVEQGGLVRLRYNTAVGAWQGNFGADLSSAFFFLPFLLLAASSFFFLFLSSVFHFKSSFPSILRTPPGIQWWLLILEDQGPGLAWLPFLSRYLAAPLQLTHNNSLAFLRVAKSHRTAVHPPPRMPSSHTAG	hypothetical protein IF2G_02556 [Cordyceps javanica]
TQW09767.1	MAMDGAPSILVTNKVSNPQQCRFQPAKKTCADHDFAWRLTLRHTWRQPGLAFTALLGGFMIPAEWRLRRRPTAHHKAPWESVMQRRAIRNK	hypothetical protein IF2G_02557 [Cordyceps javanica]
TQW09776.1	MPTVAYNIEKDLKYMIKPGVVGDYKLSEVVPELEVVVSAEFAEVCDDGSETRERGRITNAKKRVLPLISKRPANRITADPRQGVATSEI	hypothetical protein IF2G_02566 [Cordyceps javanica]
TQW09783.1	MRGLFTYYRIPSCRPFVFVSSVAAHRPTSSALDRPAGTVMRPNMRLRCMATGIAWLAAQLTLFFPCWYYVSPLYSLEMRGNGGIVYCRQSCGFGNCLSHSGPLWRRRRPNDGPTDQSRYTFALISLTPPLSSD	hypothetical protein IF2G_02573 [Cordyceps javanica]
TQW09818.1	MLVVWPMVQRIAAHLFGYHAQGRTETLCTLLNMPTSTSSCLVIPGQAHRRWYHEHEQVLTNFAFATASRDPDCMSSGLAHSSYIILPRYALQLRIS	hypothetical protein IF2G_02608 [Cordyceps javanica]
TQW09819.1	MINGPPDDRPPAASGQLPATGQLGNCKHQALNIIHIQTPLNIHHHVSESHQIPCLEATRNSSPNMPNRSNVKLSSLAAHHGSGSPHTPLSLHCTVHTAPDQVLQHTRSCQGQDPVAAALRPEFRALNSAFCCRFCAEA	hypothetical protein IF2G_02609 [Cordyceps javanica]
TQW09821.1	MCWHGRLFRPVLVSILDPTYLTCNVRPFGLPVLIVLKLRWTSNGRPRFRSLTVVVEELHDSTPLTPRKLSQPTITELDFLLENKRRTAGSYTACIDGT	hypothetical protein IF2G_02611 [Cordyceps javanica]
TQW09824.1	MRSPRERRDRSCPRPPEYSVCPTTTIATDHLTSSSLANILPNISKSVLTPKFRLLDYSRAPRTCDLRSSEFQGGIVGRLFATT	hypothetical protein IF2G_02614 [Cordyceps javanica]
TQW09826.1	MSIASPSAVPVSIAISAAATDMRPEVLLTKVRDMSDDCCFAAVSGFHLIKTMIRVANNNNKTRRKSSFSRPSTITQLRCQATTANSLNGHQPCISGQRCSSVAASVQTPGTYRLLQRTAPALTTNYGKLLVLLKMRLLNLIGPWRPLSPPGKRRYQRVD	hypothetical protein IF2G_02616 [Cordyceps javanica]
TQW09827.1	MTVGLIRLSACLYNGPCLALTCSCRQNWATGPQGLPRPPPAGTASSVNTAKSQCPEDHKYSVIAKLQRVPGPSLISQL	hypothetical protein IF2G_02617 [Cordyceps javanica]
TQW09843.1	MNGGCSGQPAHRHRRFLNLARGAATATVGGQPVRPWPSERAGKSTLPRYPTLALHARWRLVRWAFFLFKLRCSLGSSPCVDRASSNEADFLASPTDELKIGTKGHSPYDTSASLFLSSVLFYPDTMHTAAAEKRAMYDRVRIPVLPCAWTRRTPLSIRVSGYEERKIFTQCGRAKDVFE	hypothetical protein IF2G_02633 [Cordyceps javanica]
TQW09848.1	MPCHGRVSTTIIKNAVGRLHCLDSTAGPTVGANGRAGPCAQCHARLRQYELLQRTTQLPNRHGTPRKKHDTATVRVVKTVPSFHEAACE	hypothetical protein IF2G_02638 [Cordyceps javanica]
TQW09855.1	MGGYLVAVVTVATAAREKPALERSGRRKAEANSLAVLHLYTIQQGKERRGLYGGLAGVARRIAGTGWSGA	hypothetical protein IF2G_02645 [Cordyceps javanica]
TQW09861.1	MGQRRRGIPSISSDKMTARAAFFHRGSRAVAVYITGESLLVSGAVHCWTQATWQIRRPRPTVRQRRVPGQAGLSIPASPRQREATVG	hypothetical protein IF2G_02651 [Cordyceps javanica]
TQW09866.1	MRPHPTVPVHGRATVVFRPRQRTRKSRLSQQSLPPPPLRLQNKYGKPAESVMQTPHMRPAQTSPLTSLQSSRSTR	hypothetical protein IF2G_02656 [Cordyceps javanica]
TQW09874.1	MHIHLRLLVLGISRSHLIRHLPGCIARALQLSSRLVPCLSLSPPPGRRRLARTPPPPQPAAGLCGTTATGLQSMVRDTQQRPNKLTRSDLEAASASPEPPLRENSSWICCPPWQLAR	hypothetical protein IF2G_02664 [Cordyceps javanica]
TQW09875.1	MGKGHRGMYPSRGQTGEANGRAQTSSRGQDSRGDRGQRVQPALRQALQAAAGGANTAGIAPTGAGVGTKLLFIWGLVPFANCHGCPFELLNCLLSTPLAATPLVSIRPLLSVQTTKNRLPASPDSPQPLVPFPLQLSRPSSPDLTTSSLAFTAWGLEHNAIIPRKVIRPLACPLPHSNDALAVRTRRSLQRACHTSQGCAPRLACAVPPLTSHDWPHLCS	hypothetical protein IF2G_02665 [Cordyceps javanica]
TQW09876.1	MICEFVPCCQSPHRNPILPTNHHERGRSSPCFISPSEKTFSWCHFPSPHEVSS	hypothetical protein IF2G_02666 [Cordyceps javanica]
TQW09893.1	MILLLVRKHIMLGTTKLSVCADADGGRGGGGNWGSGSGETGRRILRWTAAVRQKKRRRESKAIDWEGRSGSSLFPLWLSLLKLDWRGTVQQSTTGTKRHQTSVAWITSRPLLRRSKTERRRGGVWVEP	hypothetical protein IF2G_02683 [Cordyceps javanica]
TQW09905.1	MARHRLTSYPQSRILVITLPRRRYRALLYFLPHPSVILAPPGPSFAGRPRLHFSALFFITPDGKFDQNCPASAALLFCGSLVPCSLSPFRAVGFFLTWGTRPSISHAHRIHHSMTVRAPLHQ	hypothetical protein IF2G_02695 [Cordyceps javanica]
TQW09943.1	MIMAEKGRQRALASTDRHNSHWLRLRSPPRAGPPGVKYRGRKLCYTETAKVLCSKPRNERRHGRMRGKPFDVQNSTCRIIEFEPSFCAASLIRITPKLCFFAQSFCLETTKPGTNFVASMGWGVQATIRPWCTLVKKNCHCSLLQQKRRHA	hypothetical protein IF2G_02733 [Cordyceps javanica]
TQW09944.1	MTNAMPYMIVRRINYYSCPVCRVCGREIFDKSPISPQVVSISVNSSFGQPSPFLQSVLCIPRSDTVQNCLKVGQVTASQGTVSLARVKRRRV	hypothetical protein IF2G_02734 [Cordyceps javanica]
TQW09963.1	MVLITCAKPKSDAKKAHPLSSCRPRRSSLFCFACLIQNCRVNGWVMDGDGQTILRSLPLVSGCIVSFHFTRGKRKKSMKDSMQLFNSCKKNIHQP	hypothetical protein IF2G_02753 [Cordyceps javanica]
TQW09974.1	MAALKSRISEQDGMGSVRWPFRNAWKRRYTCRVLFMAAVAEVMGFHAATTRGPSLARTAYCSRQHGGPNMAVNAMLQTKWAYSRSTSK	alternative oxidase domain-containing protein [Cordyceps javanica]
TQW09979.1	MPKKLTPPASTQQVTHIRFRPSGWTSQAVVKKLMRLFCLVTARVCVETDGGTGGCVYKWCQYHLYSSF	hypothetical protein IF2G_02769 [Cordyceps javanica]
TQW09980.1	MCDEISMARHYNSYLGQCSNGQFIRTTKSRITGAGYPRETSTESTTATTMSSCPDTAAILAQTRQRFMAAVITDAAKRWAPAEAHSHADVCRTIKITARPKEEGVVCFRLKSRLVICCSPVHHAFPALPAANLFFFLHF	hypothetical protein IF2G_02770 [Cordyceps javanica]
TQW09981.1	MKGKMHPDMVLRCWPFLPPQSQLIREEWPKPDTYQQYGRSTITACRCSGDV	hypothetical protein IF2G_02771 [Cordyceps javanica]
TQW09982.1	MHDEANASKLVRSIYFFLSLSHSTGRFPRGTLDQAGGRARPAQTAPILVASKAATANEGIDDGDGLTRRCQQTMAMRSRDPGPRASGETLCNYMNAFRFGIRNMREASNESRSARGPSHWVSAGVVTE	hypothetical protein IF2G_02772 [Cordyceps javanica]
TQW09988.1	MSARGKPLWGKKPVWGKTGTTSGMRRRQLVTPMLASLEHAAKVRQDGWVNG	hypothetical protein IF2G_02778 [Cordyceps javanica]
TQW09997.1	MNRNQVKLVRLQVPYASRCRLHRPKFVKIESCLISTPRRHSASTKSPRPCLSAPLETRESAESGLPRKCHLAVSPQWHVPFVRRRPIA	hypothetical protein IF2G_02787 [Cordyceps javanica]
TQW10010.1	MVLWVKWERYIQPDGHKTRSVLRPVACASGRVTHNARLRQTTGETVKPQQVRDITVASSAWGLVCLGRCPCPADSRKTARGGLVGTCLVVTYVRAAHTSVRKVCIEAPTTRNSSATLALSQKPKTVSSSGCGLLVFSNFLTCRVPRTAWRYLSDDACFGLGRGESHTCRCMFPIWSAQPYVTHASEQRAQLTFLPVPFPSLDRAEKKRACPTFLVPDLQDSWATSATLPERGVYLTLAPFPGSPVWILLPVCRRVGFPGRNLSA	hypothetical protein IF2G_02800 [Cordyceps javanica]
TQW10015.1	MLKVNLLGNSRHINAANYDETSIEWRQMCLRPCFGSIMLPETHMLMCEGTRERSRVCLPRPLRRGHKGT	hypothetical protein IF2G_02805 [Cordyceps javanica]
TQW10019.1	MAGLGQFVPLHLHQLTNVSAKQRISEHFGLLFIAFLSNLTAARRCYSTTLATFNLSLRRAHIGTAIFPPLEELWPP	hypothetical protein IF2G_02809 [Cordyceps javanica]
TQW10041.1	MLNAAAQEVKAVCAVVAGGALVELLNVDGVLKSAVLDKGAVGDMGKVLGQAHDESEADFGVRVQLARAELDDVAQALGRAVLATHAVVTVETERWLDDAFIVHQKAKRVDLVVYLLHGRKEKLSQSILVAEKENKLEDGHGSAILEEATLTHSRIRAFADDVSLQRHLAATAHRLGGGRGSLSRQLVEAAADVDVVAGQEAVADEDEDEDGQPEAGASSADGGGGHVGGGRGPMAVVQR	hypothetical protein IF2G_02831 [Cordyceps javanica]
TQW10054.1	MHTHLPATLRRWIQFGNTLSISTTPATADEPSLALCHTSSVIQPSIACWYSCRQSCVEIRQSMRPY	hypothetical protein IF2G_02844 [Cordyceps javanica]
TQW10071.1	MLGIRTGLLFERYPGDARSPFQLRQYPHGPKENRGREDPCLETRGTHTQYSFLFHQRALISGHL	hypothetical protein IF2G_02861 [Cordyceps javanica]
TQW10074.1	MHDNPPDYQRGAHATRNQGDQLPDRVQVRAADLLHAVLADQVLDRHGREHQQPGGQRQQGELDARTAVLILVEVRVSRQAALEAGPEARHDQVHPVPDEDDAGDEPQDRDDLAQHAEPAVKGGATEKGHLLAAAAVAGTHDVDTRKPEPAAVGRKGRVEEEARDARQRPQVADAVAGDARQRAAQQELRDDGGGRVRPRRRCRRLPRALGAQADEDGQLDDEVGRAQAGLAARHEDGRQQRRHPLRVQADAHPDPVQVRVAVVAAAVVPRREHVSRPGRCSEPSGAEAVDLRSNGSLLVLVAVSDRGGRIWV	hypothetical protein IF2G_02864 [Cordyceps javanica]
TQW10110.1	MALHSCCTLLRLTATTPTNGIYMPPTCEIAIILLTVHPQPVLNYAVCRLTVSTRRQSVAPLTHRAGSGPAQGRALLCAGAQISGLAHLPTSVWLAVPRITLPNNAGATPLATRCHQTDSQVKCLAAIANCYPAPTLPLANSSVPCE	hypothetical protein IF2G_02900 [Cordyceps javanica]
TQW10115.1	MKYQGLHSMECMEDVQAKPEGLAVRGASSSAAVGDGPALLPFAARERRRPLPVTAGASCGLGWAVRTRQRRRVCLGGAEPCDEDGFLGLAVAVYMCVFAVAPE	hypothetical protein IF2G_02905 [Cordyceps javanica]
TQW10132.1	MLIFPSPPPHGSPAQLGSLFGAAPPARTSTPANVGQSSQWDSPASAKPPNTLEEYETAETKAPTSSLPFSRLARSQARPVNPARPSLSQGFQSVTAGDYERATIEIPFVLHSFLSFFLFSDELFPVCCRI	hypothetical protein IF2G_02922 [Cordyceps javanica]
TQW10141.1	MSQPWAAELSQCTTYKQHGGVAGRRDPGRVPLAYSMAGNRMNIASVLGSNQTYAMINRSLNRRFLLKIAPSGA	hypothetical protein IF2G_02931 [Cordyceps javanica]
TQW10165.1	MCLDTACRCFVPPPPSSRFFPQCALSLTLFLSTWYFAFGRWVRRRAKRTVICMQQVAAAASSSTTGTLQYNGKNLAPRSEQTPPPVAITNNTTKPLSAQS	hypothetical protein IF2G_02955 [Cordyceps javanica]
TQW10166.1	MTLFFSFKHENAKKAGERNGTRSIPSMRAPAACKSMQGLSPHVSLTFSGSYSSLIPGVNTHICMCTCIRSTEYTHTHAPRPHQVVGAAGQPAQGPTDGHGQSCSAGRKAHILLLVGYNASSLSLSLHVVPTAEGGALVSGEARREEYRAQKKKRNSNLSVTGLHASPPTYLRKEEGGMARERGGGRPKRCPRPAKHGNVPLWLLQVSSLISDEAS	hypothetical protein IF2G_02956 [Cordyceps javanica]
TQW10167.1	MGKTAVSFNRINQNVASVSDASIAFRLLGSQSVSQSVCHSVCQSVSLSVCQSVSLSVTQSVTRPVTQAASLLLALVAGATRTREPADSHQVSGKYTHESKKN	hypothetical protein IF2G_02957 [Cordyceps javanica]
TQW10169.1	MNAMQKCLPRDGACMNLINEARSDELRRKVSIPCLQMIGTVGGARCHGALPVCPDYYTGGHASQVVQPNTRGDAANMSILRKRVSIMFKTKLCFWQCLDSEREANRSMGMSCLAAGEPLHLTATAVCTFCHSAIFAAFCLLSGPPLLSVLNSSAYIIILHQHAIPSPSLVTSINVSH	hypothetical protein IF2G_02959 [Cordyceps javanica]
TQW10170.1	MLGCTQPVGPRASVAHQKQASVAGSPPTAKVYAPIVACTGYQPKLSVVFSHLGSYMQGKDKSGSHPDAKKMPCLSSPQRRPILLSLDEPLNVPLEAVAAVLLRHRAAPQRHGTTPKPLVKSSSQRGMVRATCRVNDSTNKTHPRKPPRSQRRIIGAQATLAVCVAHGALVLAACSW	hypothetical protein IF2G_02960 [Cordyceps javanica]
TQW10171.1	MTDRAVLSQKRNSTLRFKTRLQQYGEKCDELAIPNFAGEKLLDRNEKGASWGERGSCTEYCCSNSSDHCCSIC	hypothetical protein IF2G_02961 [Cordyceps javanica]
TQW10172.1	MVYPRHCKCYAKAAFFLFKTSTRGCVRSPLRVATPTCRQNDQLRGYWAAMQFCFQACLSDMRNSRQENKACHAPDMREHCINIWGPHGQHPALAHKSSWGSGVFAATLADRNLTGGAGVSTNELVLILRCTQLRKALACFYRLSLFPPDFSATCCGNLDLSGAALIENLGSEQKQSVKCQWLV	hypothetical protein IF2G_02962 [Cordyceps javanica]
TQW10174.1	MHGECLFALLSRLRCCYAFLEARRRCAFVEGEICYGHGGLVSLCVLRSVASTPQLPTRVGGGPCLCNRTISTE	hypothetical protein IF2G_02964 [Cordyceps javanica]
TQW10178.1	MWATTGSGDKDFGVSWQRRLLICKTCNEYYDFCVWILVEKEDNESTTYHMIAGTKSTMSITTIVARDTAPAVATASLNIARPGSFGYRPALAYSPSDKSAKKKKKRVEKVCGHEG	hypothetical protein IF2G_02968 [Cordyceps javanica]
TQW10198.1	MPHSHTITSANEQLSTHIHGVHSRSDQKHNIADLRRPKVCVLIPSSCSYGRDPSCSKKPAHSRMATPASQRRARVPLVRKSQDLLCTLRSLSTCQSKLPLKLSKEKIQGMPRCTGIAARLFVRRPFRDEHVMPRDHTPLRQLCCHHRAVCRNPCLAEHY	hypothetical protein IF2G_02988 [Cordyceps javanica]
TQW10205.1	MTFGSSSCSFSIRRIGLPNIQKYVTSKMITVYQYRSFMLFRCMSGATDLYCEWLPLCLDGPAHRWRFVPLSFLV	hypothetical protein IF2G_02995 [Cordyceps javanica]
TQW10209.1	MSTYLGGPGTGGLGVGGWGELCTFYCFECFSSSFTLPRYNLGPPMMKGKVPFFSSFFLHPGRQQGWRLTRSTQGKKKERAIRFFFWAGNGHWVFLRARGLDDSFFRASLVL	hypothetical protein IF2G_02999 [Cordyceps javanica]
TQW10215.1	MAKRCRQPLRGNVHHHRRGLKFQVQSIGKENIDMSNLDFPFNRSWCYCNCRVPTDVVRWSVSPPRYVPYVARQFLPASQVTSTGKYHLSSAFGSDMSVYLTAGPTFLVRQTCATPFTLRSSYLVPLGQGKKNIHPWLTDLSSTPLPRLLARRNSPMYSTK	hypothetical protein IF2G_03005 [Cordyceps javanica]
TQW10216.1	MAQPTWNRCLVRQQVRNTQVACLLANMRHTASRIIRRNQPPPAPQARIRLQSPSECASKTDILPCLLGIHTRPASDSRLNHSTTPDYGVLTRRIRCPLLR	hypothetical protein IF2G_03006 [Cordyceps javanica]
TQW10219.1	MVHGSAETGSHWTMGLSTRVAVTFWGNEQSHRIEGSEEFVFMLCNVTDVNVLCDVWNFGLQAPNIECCRVVSIGNEGWVNVRKAALCFAARKHYLHDNVAFQSVREAEPQFISRPRAPQSSRTQGTYGVIAEKLKEGWRSQFRGWRGRSVGQVADWTGAMFPWMAGESPRSKETTKNVCVLCTE	hypothetical protein IF2G_03009 [Cordyceps javanica]
TQW10225.1	MVPGATTSDNFSWVRDIVPQSRLHSDSPTTKQVLGAPTAGSPGARSSIAPRVSQEEVSSCNLPLTITDANRKPLTPLLPKAANAELARGDCEPKAASRWKLPTARAQCDSVREYYASCEAKTLDSVFLVLPGGFRVQCDEARPKWISQKSKISKGGHLSLPRTFSWTLPSKPCCLFDTTNLPGADVDIAQGTNVSVHFQHIEEVIMLFPKMDESWWALFDNDPVLDDSGSGRGRPPPTS	hypothetical protein IF2G_03015 [Cordyceps javanica]
TQW10235.1	MLVGTALAIARPPRYCTIEWTPQPCSLLQSYKMYSARFAPVYFPCVGGSRLHSVSLVYQIHHLTCLEIPKRNVLTHHFKDDNHIITTVTAG	hypothetical protein IF2G_03025 [Cordyceps javanica]
TQW10243.1	MTSQWRSKRAAGCCVTEHAVWTPRYYFTNKILSQALKDLSGDVPPSTDKLSALLPKIQYTVLRTLHRVWFQFRAGLSCIDSKT	hypothetical protein IF2G_03033 [Cordyceps javanica]
TQW10250.1	MLSGLTSLLACVITVLHPRTSSKHHSWFINVFRFEEAQREPTENCSDSSHFFAPRTTAPPQLQTLPLSPYPTPPSKNNEQTSFQHSALNRYCWCPGV	hypothetical protein IF2G_03040 [Cordyceps javanica]
TQW10251.1	MNGSPHPWTRQHNRHSELCLAIDSVLAAGFIQPTSLRSSFHFTLLEQLLSHCVTLVSRPVALATQPGFASVLGHSTTSALHPVSMI	hypothetical protein IF2G_03041 [Cordyceps javanica]
TQW10261.1	MLKPTFNVTRWSLDLFVILTLIQVEKRGSEPFRLPGCSCHDIYLPLLSRNIFCYTLFPLQFRTGL	hypothetical protein IF2G_03051 [Cordyceps javanica]
TQW10272.1	MSASLPGDRELPRSQYDLSTYFGRVQHAITLTDPSTLFAGQSGLENAKQLVTKYKTGEIKDMTPDLWNAKKIVDSTLHPGTSNTSKRLFNDPTHG	tricarboxylate carrier domain-containing protein [Cordyceps javanica]
TQW10280.1	MLLVPYLQGNLGRYQDQVAQGSLRHLILAHPSSISRLGQANPCLSERSEREPSVQFVTTEPSKFYESWQRLEG	hypothetical protein IF2G_01222 [Cordyceps javanica]
TQW10284.1	MPRIFIHGYTYDVPTKSYQQVRLCENRCGEASLAQPLQSRCRVWCALTMFRFVPTKYPHKVRLSLSQSYDSIGTQYFVKWPTGGAASAQRPNHECKTIRKTDLRRGWTTVTNMSHSQPSPR	hypothetical protein IF2G_01226 [Cordyceps javanica]
TQW10285.1	MVSVSGMYHVRRLNLSSQVAGNNNKTRKARVISIVQGRSPCVWQQWRDNAPIKLCRSDG	hypothetical protein IF2G_01227 [Cordyceps javanica]
TQW10288.1	MSNSERKQREAQKVEMVPDDDEDEMVPDDDEDEKDEEKKVHGTRESRHDADVDEMTELPDN	hypothetical protein IF2G_01230 [Cordyceps javanica]
TQW10300.1	MASSLSCSRLPNRDSPLHDSVLVCKLVAVSFACFSLTSPVSGDLPRQVSSAKELGDTKLLDQTMPINLLLVAVSTSYRHHQASLGRHPEPLSKRGNF	hypothetical protein IF2G_01242 [Cordyceps javanica]
TQW10337.1	MRVPQTLNDESRRNQAQGETDLHATLKYIVETRGIQGRWLSSFNFHGRRHSVVSLVPGLIALANRSVE	hypothetical protein IF2G_01279 [Cordyceps javanica]
TQW10359.1	MHAPGTKRSPGSDGPRSRKPEHTPVTRHFALIHYTRSKTSTRLICKQVWALQDLTQFVFKTRYSVVSQWRDMKAVKLSVLGGWARGLRSLPTWLAKLSCKLVKQATRHVKQHPAID	hypothetical protein IF2G_01301 [Cordyceps javanica]
TQW10360.1	MSSYNLLLGADLPPPSGAIHSSVAKTCIHFFRTSHANSTACKRAEAFRPASLPRCVFLEAENQYNGHVLIVSLPAKSLPQTRNGPGTLHDKRPYQAQASLSTAFDLPPATTLHPLWC	hypothetical protein IF2G_01302 [Cordyceps javanica]
TQW10367.1	MAVLERRAGAANTFPLFIKILRGEMNRNIIPPFIVRRTGRCAVLVLSFYVTIVRF	hypothetical protein IF2G_01309 [Cordyceps javanica]
TQW10374.1	MPQPYKSYTLNLFGIAARQLNGSTFAAEEAQDCSPASGPLLVEKDQLVRVCECMARPQRDLKPSSGVLYWISSPKEAGGGGGGFLGAVKVIKPLEGSRASYMKSSRSQPLLSAPGAAERRRNANNVSKSASLRSYIRGSWRASQGRRAGGLVGNAISRFAKAVKWRGHEGGKEIIHQGSIRYLVGDPSSYQELQ	hypothetical protein IF2G_01316 [Cordyceps javanica]
TQW10377.1	MRKETTLGCCSTTSLGLRCTKVRPCGIFGLWDCDKSPFWSVAFGEASCRNVMDLKDRAALCDDTLQPVGDMLPRVPNEVEMSSIATLRRRHSSHLALLCCTSTDST	hypothetical protein IF2G_01319 [Cordyceps javanica]
TQW10385.1	MVGSKRKRVLEDFDPNKSDSDDENFDPTEERPRRSSKKARPAGGRSGRKRGHNYRGSDIEDDEDDLSNSQDDSFGDDDEDDDEDAPINAAGRKTRKVAVKAQNYAESSEEEEAQLSDDGKVESDDDEQDRKPTRSSSRVVKLKVPSAALSDMPRRATRATSHDQEDLVELSASGRHAVASRGSISRSPEPVTRRSSRASKGIKIAAETIDEATQESSLKDTVADDDHLDELDKDIRDLSKRKDVNEVMEDIEKRETADDTNAANDNDDDDDDDDILTSRRTRAPRTETAVEEMEEAEEVQDASSRPNRRLTRKSSARKSTQEPSSDFEPGDDSEDAASDMGKDAADDNLDSPTPHGRGGRQSRSAGASRHDSGDEEADLDLDELNEEARELRKSSRSRR…	AAA family ATPase [Cordyceps javanica]
TQW10390.1	MQMNRLPKQLARMVRSRSRRTGMIGCAALLSHHTNPMKQATESGRVVNGMGWVHGTSVPPVFSPSSSRTKNEHVKKAPR	hypothetical protein IF2G_01332 [Cordyceps javanica]
TQW10404.1	MCPASVYDISQQCLVVWSSKAELQTFLEKYGGWMIRVAHVNLGTKRLVTRLITNSALQLTAVTEYPQLIPWYRVSHTGLRKRE	hypothetical protein IF2G_01346 [Cordyceps javanica]
TQW10408.1	MRRTRLAYSVLTPGSRSRQGRLELPSIHNSESRSSRLGPSNDASISMRIHDAGCGFAQGLARLEHKEKKKTSRATNIVTSAKRLNA	hypothetical protein IF2G_01350 [Cordyceps javanica]
TQW10409.1	MPFETSAGQTEPNACDATHKPCIFEGDLSKRRGSVVVVRCRPSISFWRHQQDFLTFLSLCPPWHLNLTWQNIQRYRRPSTTLFFFSFLSLSSPPIQQPSTRRQQGDRRNPRHIDLG	hypothetical protein IF2G_01351 [Cordyceps javanica]
TQW10410.1	MTNPTQKLQRRRSPTRLTSMPGSHSCNVPACSLVASR	hypothetical protein IF2G_01352 [Cordyceps javanica]
TQW10416.1	MSCNSSSRHLRRKTEIEEAELALHYILDAPLCRLTTLPIYYRAQRGVPFNAVDHDDVNEYIRHRTPYIDWTCKTSAQISLICQKRGKKKEKKGQGKKRTRKKNVQHPVFAGRHRANY	hypothetical protein IF2G_01358 [Cordyceps javanica]
TQW10426.1	MKETMLPKYFQLRLPSDGCTEADALIAYVALWTPNRDRNTAFVLDTLDTAMPAHPQLEGFMAGVSDSVSFNFKLVHCGRLQPNNPFRNLIAFTSRPK	hypothetical protein IF2G_01368 [Cordyceps javanica]
TQW10428.1	MVTVRIIKATPSCLRSNCVKGDRITLGCRLDVLIQQLHLVRHVRSSLLCSDSDIDCRDSSSAAPGQLLQLAVGKFECDAGRARSSPARSLACPVWLLSFILMPCHLTSSLLIPSRTFAKAGGILHSRLERVFNENRKAIRLLSITWSLRHQIPYIIHMAGGYGGDGGGKFDNCEQPTVILLDAV	hypothetical protein IF2G_01370 [Cordyceps javanica]
TQW10435.1	MNSPFRHSAIVSYKSTKTAISWPLGTLLPASFTTLNGHSTRQSTDSTYFYAQRSLTTHSCHRQPTDEALS	hypothetical protein IF2G_01377 [Cordyceps javanica]
TQW10445.1	MRPAHSPHEDRHEQWIIETLLWQGPTCDSWSDPREWSIALLALEIASTLLVRPLRRVPPANLRRAPRSHSSTGNSSGDPRTGGWPGHHICDLARNGSPESCHQLRVDCQNNSFKASYIACFDPPPYCLAGHVKQSLQNKFMSDLKVLMHI	hypothetical protein IF2G_01387 [Cordyceps javanica]
TQW10446.1	MISNPSGLCVNFTIILDLAARILFLPAAIHFSFSPFDLLFPALLPWLLLTDSALHHGSWADGSPDYDVSWLRSRARAVEPKTEVGTSREATISLHVRGPCFLLD	hypothetical protein IF2G_01388 [Cordyceps javanica]
TQW10458.1	MGDESLVLAVGGKAVQQVESVRDPKQDADWLRVPSECCIDQRSCSLVHTEHMRAAARPARNLVPSHAVDYGAL	hypothetical protein IF2G_01400 [Cordyceps javanica]
TQW10459.1	MLILIRPFKCYCRRLGVGRVDVGTKGDHNGSSPWSARLFFNALISEMRQPDQPRQESRK	hypothetical protein IF2G_01401 [Cordyceps javanica]
TQW10472.1	MLDQETLPQSYLASHITHTRGVSLVCTTKRTSASYEQIDSLLRKSSAFLHHTTETVRPNLWQSVSHPKSPFLIVRDRQGPETGKQFAVRSLLATRCLDMIDQYYGYCVGSRLSTYYSRIHEFTS	hypothetical protein IF2G_01414 [Cordyceps javanica]
TQW10475.1	MLPHAVIAAVAGCLLVPDYSAWLLPKRKISSSSALCHSDSQPSISVLPEQALQGHPPCLQSLLCASNLESELAHGDSVSSVVTFAYNLGVNPLGHFSLSNGTDVWPFAGSL	hypothetical protein IF2G_01417 [Cordyceps javanica]
TQW10481.1	MTDRHAQTRGSEYLQRAAHPFRTISGRPSPAIMPANQSTSQPANQPSRRRPNTSKVARCFCSCTTTGSSPLGYNRQPPLHITRNDE	hypothetical protein IF2G_01423 [Cordyceps javanica]
TQW10487.1	MPLFAWCCCETRCRRDKASARQDKRLAPTDMLEGGSWWPSQSDSRRRLCTLSADSSCSLSFLFKVLVTSGQARPASIIWHKRMLQHLHGPRRSFTQAALQNLLTQRYHHQEKKGKKISYNLVFCFVSTLILPPSRQRSDRVGVIRPFSLPLTTIRPGFVAPPPPSYSVLSIMVETLSTWLVLRSTEYRTYGRTPFSHFAARTIGTTPLSLLGLVTGRRTVFLGCNFLWPTRW	hypothetical protein IF2G_01429 [Cordyceps javanica]
TQW10491.1	MQDVPISKYASHRGGGGMRNLRICRPHNWYTKNAKIIHGQFGLRSRYRAHLRLHPRSYLAAQYGVLEVY	hypothetical protein IF2G_01433 [Cordyceps javanica]
TQW10492.1	MSLLGRPPGMEEDEEEVALADMSAASVCGRCSCRQGASRHTSYLSMQAERVDRVCAVKYTLTRYAHDFRREMSGQGRRHWHGSVSTGISRLSHGASWMAIVSAMVFCLSKCR	hypothetical protein IF2G_01434 [Cordyceps javanica]
TQW10495.1	MQRSALCTEPTYYGASQWSPSYPILTTVREQYTTYIPLPDPEKENVNRADRRSRFLAMNRKGFPMVIRASLPVKMLLPALLYKTDTRSSVYLFCFFFLCPTLL	hypothetical protein IF2G_01437 [Cordyceps javanica]
TQW10497.1	MTTLSSNTGQSTVSTTTIDITVSANPLPQREKATRLSRPQLVPASGRRAPLPFSLFSLVSLITHSLTRKKAAPWSLTRTPSHCALHRATATTPPAPCCPTATPLTHSLHRASYTHTPSPSLNSLSLVPPPPVPEQARPSSELASLS	hypothetical protein IF2G_01439 [Cordyceps javanica]
TQW10498.1	MDERRQTLEHVRLCITIPEASSMGGLFDICFKALILPFFRPREDGVGTARVLSGAAISYRSHHRLGQDTSPPHQTAHCLPHEWSRALASTWPKGWLCGPQLAPRQAGST	hypothetical protein IF2G_01440 [Cordyceps javanica]
TQW10503.1	MPVVQSTTPSSSLPLDRFPSPLVTTPVASRHSRPFCTHQLAPTFETRPLAYYSLGPSCICHDVVTTLSSSLHQKHNRSGSVNLTSSVVILASKSMCQHAQQTTVLLGQHCPTPILSRVSDLSQHPCHYPPLSQFFFFFDYVNSRADCLCIFAAGVLLQHKVINTGTSRCFFCSTSIACRIPAHGWSTHTFAFCTKR	hypothetical protein IF2G_01445 [Cordyceps javanica]
TQW10512.1	MVFLPRVPASLSDPRVNSAKLAPFQLGCCKENFSPSVVIRRSSYSIREPLTNHSHRITAHYASRQIRSVKYLYIHQTNLDSV	hypothetical protein IF2G_01454 [Cordyceps javanica]
TQW10513.1	MSKKAGPAVSALNPPRLCITEMYYHRLRCLPPSYCICLRRAGLKCELFLFRNCSRLASTPMASKQGNPRSIACFWTAPALAASLDYN	hypothetical protein IF2G_01455 [Cordyceps javanica]
TQW10518.1	MASTPSVLKDGAFRGGGRGMEGGQVMGKPGRVRVASVATRKSEAVDGHCNPEGLCPCQL	hypothetical protein IF2G_01460 [Cordyceps javanica]
TQW10534.1	MQRVRRTKVLEPSARGMAAVKLGWPGHCSADASGQQLLQDAHRPRGHCRAQERYPAPGYVEERGPVPQHQA	hypothetical protein IF2G_01476 [Cordyceps javanica]
TQW10548.1	MRRLLCPHHTRRTACSGHLHKSDNPCHCQRRECIPNPGSCLPREHTRHRQVLSSIPGQLGEEAFAPSSHHAPPLAGLDQSVTSSKRQRPVSNWLHWLVPLLQLITHYSQPELLDWQDW	hypothetical protein IF2G_01490 [Cordyceps javanica]
TQW10550.1	MPNHSSASRGGATARLVAPFTKPRPSNHARLVSLRLSPYAPSLSGHAKGRNGRRRRVKKKKKGAPQSPVIRPSLPPLPLFAPQDRGLVFDWAIVRGRAPTKTLDGPGKQLSGDGGRNGLCSFSSALSPLLMAVVSVTAARKKKSSLSGSPWRIPHNWSSQTALPPGAHSFYFFLALTTLDTFLLGGGGGKGGGADGRDDPCGPVARKTLAQINGAAGLAGTGDAAQLRSPTQLRAKQWGRGLANTPQTSPRLMHCYY	hypothetical protein IF2G_01492 [Cordyceps javanica]
TQW10551.1	MQTTVIARWVGSVTRLQAFLAWACVAQEEQLRMKQGKMKKKEQRQGHFVFPMPQVEGGWPARCKTLLHDTLRHRERCLGGGIAGRFFFSPTGNHSAVGH	hypothetical protein IF2G_01493 [Cordyceps javanica]
TQW10554.1	MAVWLGMVMVMMPTVGSGRLAVSSWQLAAITRRLLQVINMQFEYTLLFCLPGPSARPFVRLVVAVCFTPVAFSCRLLPRSNPAKLSQTTHHHEAQQDTTTSEFPRPTRPQAGALPSSLALFLSFSPSTYSFASSVRDHLRKRLTGARRGDMAIKGRPCQRQGGWNGGKAKRKKKVKKK	hypothetical protein IF2G_01496 [Cordyceps javanica]
TQW10555.1	MSRVDEADAADAPCQLTMMNAPMTRRMRTATKTMIGFLYREDAMASRKDAEREADLLAGRGPVSGWKRGGWCVKNLEERVVFGGFSGHSGLADGASRGKNREGGLVLR	hypothetical protein IF2G_01497 [Cordyceps javanica]
TQW10585.1	MDRINEKPCAQNITVEDRHRTQHHDSTSITGAASKLVCNHAAPTTVPRDLAKTLNQLTHHLQEDITIYTLCLAVLAETRCISILTDKKVTPTENVATISSPVHGAF	hypothetical protein IF2G_01527 [Cordyceps javanica]
TQW10595.1	MPHTEALFVQAEGSVRPRIYRTGPWTERKAVNIFDGHVLGCSSHPWVLRNMIVRTRQQSRVALHPCGLCSTLS	hypothetical protein IF2G_01537 [Cordyceps javanica]
TQW10596.1	MMADAPAEPALSAAPRPMAHVALEIPSTFLTTTLRPTSVGSHHAATTITNTIHALVRDVDESWLSGDYSNTAREISRRNESFLRGIRLGIGFGAAAFAILLIGAVYVGIRCCRNKPSDEGDSSSMEISGVQYEMREEYGPKPLSRCSTCDTDAVRAESSLRADLGLSRSDRPSSRHVIEDDRIRGAAREEEATPRVNHSV	hypothetical protein IF2G_01538 [Cordyceps javanica]
TQW10602.1	MEEDGRGWASERDFCSCQFQGEKAGQELRGNAVGKENVVTSGCLFFHLLSDRGPSSNL	hypothetical protein IF2G_01544 [Cordyceps javanica]
TQW10609.1	MHVAFMPLDGAVALGRIGHIWAQYLLVPITQASFRHALTPFQTQPRPCSVWRCFSVTDCKDLCMGSGLCFRAMLAATRIADLRSPWREKLFSRVPLMVFFGSTVLDSDL	hypothetical protein IF2G_01551 [Cordyceps javanica]
TQW10610.1	MDGIPRHNHYKLKQFKLFSHHTGNLKRERIVAHLADPRHPSRQTSPAGNIPRRGMAAPRLLAPRCHSRLHEPIMVRGVDPINHSWYFARLVGTGISYESTASVRKRSLGGLHSLDQDGRWAITRAMRGSSKRLLLCKLYQYDMFLAISQFVTS	hypothetical protein IF2G_01552 [Cordyceps javanica]
TQW10624.1	MRLDSLCITRHIPADRQCASNGVFRSQMASNGDSDPRSRASGGQLADGAQVNLVFFIPSLWACKSGVCPSEVTLRFFWVLKGRSALHCSHVHTSIIIEFYNCLASHQLPWSPPFVPRRNAKIIA	hypothetical protein IF2G_01566 [Cordyceps javanica]
TQW10625.1	MAILFAILIRLAVIAYAFQPLQLAFGGADSLDQGATVAKTNLATLDLGDEADFLKLALLLACLPNVCDKLIAGLDGAGETSLVLLDVGRVAAGERADNLEAGRIPRVQAVHDGTAEAHLLAGLGRGMKGVVVAVEAVEEGRLGGGLVSKYGIGLLVLGRRIADSSGALGAIPVALADEEGA	hypothetical protein IF2G_01567 [Cordyceps javanica]
TQW10630.1	MVRSWLPTDTYDDTRGTDVDGAWARDWVELGRLMRPRHFFSSRSPASFRLFCSLYSLSPCQLEQERGHPAARPYREKATTKRRDGPTEEDVIRQGRELTYLPTYLPTQVLYLPVCLCTSSFDRPETSSTATWWSRLGATYRLTLAEIRQRSIRATKKDDEEQDGISKKKKKRSKKSLPLFPFLFSTRLVTTASIGCETSCIASLPLTYVRYLARASSLAARQPPQQTNNRVGYAPWVVPNRTIYLSTLVKYGPEVSYSKGQFWWF	hypothetical protein IF2G_01572 [Cordyceps javanica]
TQW10652.1	MAVQYERPTGGSSVKWPRTAVGGFYHSHVAARWVTTAIPQMGATEGLQQVSRVVQCAKGARYSVVFFRPYTSPYFKRRRRVRSLESGGGGGSGRRSWVVPVTGDYTIERPFLIPCLPC	hypothetical protein IF2G_01594 [Cordyceps javanica]
TQW10663.1	MTLPQIAKNEKGKKSNSFLSAFLGAPWQRLQLFSGWLPQSCGHTDGCCILVLFFDADRINLGRGGGLAD	hypothetical protein IF2G_01605 [Cordyceps javanica]
TQW10664.1	MRSDASCRRTQDRLVCSRSWTGEGRGSGIATITTYRLWWAVKPRLPVAGVSRADWRSDCRLQEKGRRRSDADGESEPAGRCRSSKSRRKALKEPD	hypothetical protein IF2G_01606 [Cordyceps javanica]
TQW10665.1	MRKMHGMPWRCGRVEGWTGGQVDRGGRTVPRVGVAVIVFAVLYVWRARRNETRHESKRSDNHKQEQAEEVERGGRRGRGCAQRGGRRR	hypothetical protein IF2G_01607 [Cordyceps javanica]
TQW10672.1	MEQASAITSQECVTGKMGIIVDHRSEHPVMPKATSIGEYCQLPAASCQLPTASQRSQVGRVERTATCATCGDCQRSSAPLSVCHRLPESQPQS	hypothetical protein IF2G_01614 [Cordyceps javanica]
TQW10674.1	MNDEGRQAWGIYKGDEGTTTNKEMRQREEQPKSTNRWGELIEASCRERGPARSLPIQATYYLRT	hypothetical protein IF2G_01616 [Cordyceps javanica]
TQW10678.1	MCAMPSSEGVVALFLLGFFCLLKRADASGSERYPSRLPVRRQQRMDRAKKDSIGEAGNGQTVTADKANARSK	hypothetical protein IF2G_01620 [Cordyceps javanica]
TQW10680.1	MVRALPCFGFIEAACDPFPGTFRTAQPTPGMWASPGPGPFSSGRAESRMTPPRWLWRPLFMLAYRFSEPLPWYLSFFCLFAFCPSVVRPRFASSRECGVGGASAGKQGLWRLWRRERVDSSLSDVTSSQRQFF	hypothetical protein IF2G_01622 [Cordyceps javanica]
TQW10687.1	MTLPVPPLVACVCSHPDWQQLTLSSPVARSYRQLRPGRATTSATCCWRLPIAYQYHHLILNPSALLRSPFSVQKARVA	hypothetical protein IF2G_01629 [Cordyceps javanica]
TQW10690.1	MLQELKQYSTSASSGADQNIAAMTHGQCCSNLYCIRQRAACNHCGFALRSTRLATELANKYCLVDALAFTRMLSENGAGYPCTSVELPEEKYPGDAM	hypothetical protein IF2G_01632 [Cordyceps javanica]
TQW10694.1	MSDRQHCVPAFVRAPEARSVRAAAHRRTARLLMLPTSIPSPRTIGLPLTSSAVILSRQRTEQAMPLQQMLDTASCPQLLLLPPSTPTRTHSAQARSALWPLPACGLTRYIRS	hypothetical protein IF2G_01636 [Cordyceps javanica]
TQW10695.1	MEYRYSFSWMLNQPHNGRIMSRVSSVAVLGVATLCLRPHSPDTELFLSRPLEMLDWVTNV	hypothetical protein IF2G_01637 [Cordyceps javanica]
TQW10697.1	MSWGQKNFRIYKPVNVLLHLATLSAGQRKKAAGLGLGESHRVISDESAHLALPELNVFATNLIL	hypothetical protein IF2G_01639 [Cordyceps javanica]
TQW10706.1	MMYASAGPATEANELGLPVTNVVPLSLVLLEGFTWRELLPTVMHPLSTSLPKLVASEA	hypothetical protein IF2G_01648 [Cordyceps javanica]
TQW10710.1	MHSSVLDHFLIDALALELYHVQGKFYTGESVHPLLCYHYNESELESVPSHNHSSAAKHIPSNTII	hypothetical protein IF2G_01652 [Cordyceps javanica]
TQW10714.1	MAEMMSEDPGHCGRKKARLLRTGSSKTTCKWRWCWRLLELAGGFMAAHEHGQANESQDDAGWCPGVMIGDPRSPQSPPPSPWGSRTNNEQAR	hypothetical protein IF2G_01656 [Cordyceps javanica]
TQW10716.1	MLLPWGKTPFSHHFRPSCHHGRPPVSQNYDTSNDLLLLLLPEPVRKTNCLPPSCVDQQHVALSTHKLWDLSGWAASNLPSTSVCPQRDT	hypothetical protein IF2G_01658 [Cordyceps javanica]
TQW10719.1	MRVEDGSFKPRAGVNGASCAQQCQNPGVTSAGAGAGARNDGLELEQVNVVMVSLRWRRREGRSAGQVGVAMGWIAMGKLLTDLGKNGQSCGRSNTNRESSELQVKRSRGCGRRITTEGRAWDTGTQGGQGNQEREVVKRAELPNLGYLGRARGARGIARKCARRCSGTAVGCG	hypothetical protein IF2G_01661 [Cordyceps javanica]
TQW10720.1	MTTILDLNVSGVTSICIQCCREQVSATPVGGTEPESRECIQGENQWPGSRHAHTKMYDEAGGGMAATRRCDLIQRHEMLQV	hypothetical protein IF2G_01662 [Cordyceps javanica]
TQW10726.1	MMLCTIATIYLRAFQDIIIRTQWALDIFYQHGQGGSLITRTLAHPNACTLLYVASSAHPPV	hypothetical protein IF2G_01668 [Cordyceps javanica]
TQW10728.1	MIRKPGRLQIGAQSRIQMSKSCKFRSMQRGGVRRLFVSAERSEESVGVNADPGYGDYSETTTRASIAGVVVVLSRQLRFEKVECTSAEFGLVGNNNWSFLAQLECSVVVEWCRCGATPTFLRNGDSFFFPFQPEGRSMARSKQLQTGKAVRLKLERQ	hypothetical protein IF2G_01670 [Cordyceps javanica]
TQW10732.1	MLRMLARAMTRVYTPVLKISLQQHYERSTMKGSPPLAPWLWSGKYLVLCFAGAARDATTPMLYWLMRK	hypothetical protein IF2G_01674 [Cordyceps javanica]
TQW10748.1	MHACGDDGKRHHIIRSAPVVVETCGGCRFEFDARIILAATPPKPCCTRWSAGESTLFILHLLCLGAHRCIMLDAAPSTSYCITRCCQCCQCCQNCPTVSTLPQPTTAGPVTGPPNYEMDSPNSTLVPSWGIYQY	hypothetical protein IF2G_01690 [Cordyceps javanica]
TQW10776.1	MQRIKWGTDIIHSYDKPKQHLFHFQLVCMRMMHSRKTCRPVSPQPRYVGPCATSIWGFKTSSVLLYLSLIPIPVYREVIVTTVVVITIAHITTVCGSSFLCTSVSNFFENGAHHTLFMPT	hypothetical protein IF2G_01718 [Cordyceps javanica]
TQW10778.1	MSAADRQDLVWETTTICTVSLILLEGEAHSDAGRCKTTRHIVHRRLYASSSLSEEDFWGTSDLESLVWL	hypothetical protein IF2G_01720 [Cordyceps javanica]
TQW10787.1	MDSLVLEKNKMAWSRMVRERQAESGDVFDVIKRRHGLSFYLFALPPPGYQRMGYGM	hypothetical protein IF2G_01729 [Cordyceps javanica]
TQW10792.1	MVLFLSIDLSVETAEAHEGAVMWDRWQNTKAASLDTQDGLENVKDKRIVRLGKHKRCSSIMRIALLYTSPDSPIVLKWRAAFSAMTCGNREFKTASLLFAIRDSGM	hypothetical protein IF2G_01734 [Cordyceps javanica]
TQW10797.1	MMQRRGGTYVGVVCLVPGGAAANTNSRSQFTYGTDISKYLSSGYLASWQASSRWTSTGKVPWVSLAQSHHYPQQGSGPLLTATLQAAFGGGQRR	hypothetical protein IF2G_01739 [Cordyceps javanica]
TQW10826.1	MMSAGVMVQFDDGEEASVRTLVRGCCRGGGDRYQARERQKRRHTIPMGSDSQGLSVIL	hypothetical protein IF2G_01768 [Cordyceps javanica]
TQW10827.1	MQGLAPTAPGHVSRARLVGCPVSFTHELDSGCACNLRQAFFPVQTSIANY	hypothetical protein IF2G_01769 [Cordyceps javanica]
TQW10837.1	MPVVSENIWRIVSHRPENSSQSCLQKRTTPGNCPSPVPQSPLALDGQRGYRFHRQRCPGLVGTSSARSGSNLGIRYLNINHVTCLSKGDDFGRNEPGRQLLLGRRHAQVIPQPAGDGPHDAVHDVSPCIRVERLTKFGIELPNHLPKLLLRNASRVQYFGVQVRKGRCQVAVEEPVASHPDDSCRGVFYRVHRHVGVEVRVAWMARTPFLSKVGLDIIAHDGRVGRRKSGADAVTGRCIGKARGILVAAALQVSGKSVARAIGSCHGCQSVFCFLLNLAQRRLPKQRWYFGDWLIRSMGRLFGSTRRRLQLTTTKKE	hypothetical protein IF2G_01779 [Cordyceps javanica]
TQW10853.1	MPQHAHILALYSSTLPALEPAIGETLTNAQVAGRTEQYNRDCPGISGNSHTEFHQLWSPPQDEILRQSLLVYKSALESNAVHTSRMTTGEYPSIVRTTHLFFRRPLKRPPSSVRSPGRTKIDGVHTK	hypothetical protein IF2G_01795 [Cordyceps javanica]
TQW10880.1	MGRPNDAGSGEDSFGGCGSGTMVRRRSWAELGSWPPIEGQAATETAFGVATWQETWRGGRVCACSGLKRLNNTENCTGTDVTGVLGMLGVLDEGAS	hypothetical protein IF2G_01822 [Cordyceps javanica]
TQW10889.1	MRRARKDVEQFRRDRIQDNPEPLSESRRAVVLCCLSKLSSAHHLLPLPLKDGHAYRTLCGGGENLPD	hypothetical protein IF2G_01831 [Cordyceps javanica]
TQW10890.1	MGVRAGQSYSPCRFGVQGRAGLHTSEPARQIDANGGMHLHQQLSPGLPSARILPFCRPRRVFEPPASTIASNLMQWTGSTARTVEYPTDGPGIPSRDHSHTVVSVALYSLRNCSLLQSRHSL	hypothetical protein IF2G_01832 [Cordyceps javanica]
TQW10891.1	MGGTEVLSFVHHQTEKQGASLCQSLRSKAGIFVACPYTCIIKVTVSPGSHRETAEAVFRLSFDLFRR	hypothetical protein IF2G_01833 [Cordyceps javanica]
TQW10894.1	MGGQAKKKGKKKFSSSVRVALLLHWPYFWFAVLLSNLAQVYPTSVVAMAWSIIISICSPYMTDGAPTKPPICASKPRVYSRLLTKCCIASLLCQYIIIQHKHTPSGHLRSPSPIFASRHVDCFLHLHNHHHTHHQQLCLPSFGFDGPETMTRWDQQG	hypothetical protein IF2G_01836 [Cordyceps javanica]
TQW10898.1	MAGRVRIHHVATLGVTLASRKREIASIVVMAECSFLGIGRWGSAGKSRGLARGGLLVISDKTWRDEAQRRAEESKLTSGEPERKVEKKGFDRSRCYSGYCYSLLCYTTTSPQCNFSHVNQH	hypothetical protein IF2G_01840 [Cordyceps javanica]
TQW10917.1	MPALFRDRCLIILTHLPAFWKRFWQKGCLGNHPFLETLSPQEVGPSLVSISPPTVAPVDELENHTQRSGLSGCEVSQQVGCNQPTSASLAYSKRWWLRSAQVMVAQD	hypothetical protein IF2G_01859 [Cordyceps javanica]
TQW10929.1	MSASVLIPPYRPIAITRSHGRALATKDTVSRPLALARSPSHRPRDNSSPLNNSPHLVSKNILWSKRKKKTVTTFAKLASFVFGHSAVASLPSPVCANRLNNPNPSKSTDTLTTCIYAHMIARVPPRRQGEPAAAARRDSRSALLLPKNDPLPALDFCR	hypothetical protein IF2G_01871 [Cordyceps javanica]
TQW10967.1	MQYITKETHSSYNVASFGDAVETHTRGNGGGTEPDLKWELTRHLPDLFYNMTCQYA	hypothetical protein IF2G_01909 [Cordyceps javanica]
TQW10972.1	MEGSKGVCGGVVDFSGVPGLWGSAPKRRLNHFVHVLVIPGDFGALFALGSSLQARVLFINSGQRWSEVVRGN	hypothetical protein IF2G_01914 [Cordyceps javanica]
TQW10994.1	MSIVVDQAYHSQTPQYDDSAVRRAGFRDRCYNRMSRFLAGKNMCRHSQQLDSLGKTKSAEFGCGSGAI	hypothetical protein IF2G_01936 [Cordyceps javanica]
TQW10999.1	MSTRQNPGMTRHARGPRQPPGRVMKCQKREKRAAGKADLPLGCAWLLIWLAKGHQIMPSLVLLSSLKRREYCQRSRSMFHPPNTPSRTVVGLLTG	hypothetical protein IF2G_01941 [Cordyceps javanica]
TQW11003.1	MLQGGGGRAVLAATDFPFPNQPRSLSAEQWLRIVRQGKTLCHYSRGPLITISERKTNDYATRRFGLQRKNFIGGRPETPEMGD	hypothetical protein IF2G_01945 [Cordyceps javanica]
TQW11011.1	MQIFLFPHCAIPSSHSLALTPPTRLHGWLAGHAGMANGFLSSVSWHIRQLPWCLSRRCQGFFFKHDPYLGME	hypothetical protein IF2G_01953 [Cordyceps javanica]
TQW11014.1	MAWVVAGVVGGPLVHDYEIWPVKPGRQRGGEGQDGSMCLLVSLQGTRHFAIDATRVCFDVVGYTVYRMPKDRALVGQLED	hypothetical protein IF2G_01956 [Cordyceps javanica]
TQW11016.1	MEAETDESANLGVFLGEGGEGRRPVQRLGICLNTFSIFSSFDSFSFSRCQAHRPVTAPASPPPPPSHRHRGCNVSCH	hypothetical protein IF2G_01958 [Cordyceps javanica]
TQW11036.1	MWKRQASPRRSYAGRGSAVAKKTYQPNSFRTVLGNKVQYTRLFPLTGLLQAFNAILHSIFVPGSHLSFTILCFRHHTATSTSFSRHL	hypothetical protein IF2G_01978 [Cordyceps javanica]
TQW11044.1	MLLACLLACLLAFIHACCCCRGSGVLPPGPLLSAPRLARVGREAPAGRQFASDAQASPGSKSDNK	hypothetical protein IF2G_01986 [Cordyceps javanica]
TQW11048.1	MQACNTITSGLQKIVCFQKNYPRLDRRAGSTPPPPPPQPTLSRQLGTLCHFMHAARCPTNNLLTGCAQLCQCTERARPLQRPFLFLSYTLESTFVLTSSPRYHNRETSCALLAGTVYL	hypothetical protein IF2G_01990 [Cordyceps javanica]
TQW11049.1	MRCACDSLVRSAMDANSNLPKCTCRGLKQRTESRFYLLRPARVINAPTLSSSQTILPSVTGPVGAPGDLGF	hypothetical protein IF2G_01991 [Cordyceps javanica]
TQW11060.1	MRSIRVSLRCAAKTTTFFDPLERLVKLLASGRWRGKTSPQLTSMCSPRLAAALRIDPTTAPI	hypothetical protein IF2G_02002 [Cordyceps javanica]
TQW11065.1	MLGMSVPVRSTKSSCVVCRAAYLYTHNAGPLSHHAPPLPHLPITVVAFRRRATFFQAALLAHYHRHLPLAFSHRANLLRPGDLAFGTTAANQGTFNVLIRAASSNLLALLIR	hypothetical protein IF2G_02007 [Cordyceps javanica]
TQW11066.1	MWYSVFPSHDPALVPVVRSRCPTRRNREKKEKKKKLYSQQETCRLPVQGYALPRKTLIPPSLIVEARSRLDVPPLLLCLTFHPLLPNPCKFATPSTIKVTASTSGLARPRAAPEHASRYPFDP	hypothetical protein IF2G_02008 [Cordyceps javanica]
TQW11077.1	MPSEECRRLDMTSITVTPRSKKLVGFALEKCIRGYKLRVTAKATPSRGRRLARSRLTGKKNIQIDDRDWNLATLTSSLPLASPFAFLLRSSGSQCLLVTQGISLVRHDLAEPRE	hypothetical protein IF2G_02019 [Cordyceps javanica]
TQW11091.1	MGRFIHAKYSVKKNELDEAKSTGADDALFKTNGYKETRTNTAPRSVVYGDGFHPLLSSTTSFPNRKHATALVSRASATKSRWTLRQATGPYDGLRMLKIQRVLFSLAARRTLSKVLSPAKFMPPAPRRPKCFLCSRTAARKSVKDHPM	hypothetical protein IF2G_02033 [Cordyceps javanica]
TQW11092.1	MNSCVDANLAVLRTFRGSDSQTEVSHTLSAYHPLLAMDSKQGFPRQSRGILGQPGLVRVLLAGG	hypothetical protein IF2G_02034 [Cordyceps javanica]
TQW11095.1	MSLFLFFFGQSSLQVLTFSPSFSCSLRLPKPCLLLGIRLVAYSRVPSPVFSFGALLGTYWYVLAPLVVMAVSRSTTDG	hypothetical protein IF2G_02037 [Cordyceps javanica]
TQW11106.1	MGAKIRIDRTGTLLFSRGQTQADGIPAHTMLKRRRTHITHRHTGVSSPVALRFPQLESTPRTEASFGATNRNAQ	hypothetical protein IF2G_02048 [Cordyceps javanica]
TQW11107.1	MLGVRSSSIWQLICKTEQCIRRCHLRGVFLVCHRRNKCITKPFLHITLLCRAPSPSTRRIHTSIRQAEHNKRADGACRNRPARSIFNRSSPYYYSKLAVNHRSVNK	hypothetical protein IF2G_02049 [Cordyceps javanica]
TQW11123.1	MGDIARKKKRQFKKEKKRKKEKEKAPSPSLCCLSQMAQCMPPGVLHSLRVLAVL	hypothetical protein IF2G_02065 [Cordyceps javanica]
TQW11124.1	MPSDILDYLNLTMSSLLLSRNDRECWVVMIHVMAEAPLFKTMCMLHPKFTSCVLFMISEGTGIIARRQSCTKRPCPYPPRIQPCNAGNGVSRNQDGPDTT	hypothetical protein IF2G_02066 [Cordyceps javanica]
TQW11125.1	MPREQVPFDNQTFCRGISAEYRHSFFEKAAAADHGTAQTLHYAKANLSLEVSLGIDSISIVLSIVTILNWTGRWQLLFNHHVGTVCQ	hypothetical protein IF2G_02067 [Cordyceps javanica]
TQW11127.1	MHDKDYNGRKVHLSYGTMGSNNTWVQTAALAEPKGICVKVRSWRFPDDVPCLSSPQVGLVRRTILSEVAQRQVADDEEDHEGHEDHEAAHPVSSDGGQTHPAPDYLCKRDQRWVRPPMGSPCWRVTVRSAFANGTESPKDRPAHAHRRLDGVGSPEPRRGDDGGSGGGAFPVSGT	hypothetical protein IF2G_02069 [Cordyceps javanica]
TQW11128.1	MWVVASPERKGGRTTKGKAAIASLQRMDKGTRGEEWREVGNCMIPFPRLQSSLTLDAGHFLFPFFLIHGFGPFATTCQLLTTTTKYYTTTTTTTTTTFAPLLPPTRHRHQTCRRVANAPGTGSS	hypothetical protein IF2G_02070 [Cordyceps javanica]
TQW11140.1	MQEGIDWVNAKNSEPASSRYANARKGARWQSLSGVLPYRDNYPHDCRGWPQNKPGIDYSTALENKTPPLVLQKKCRHQGLGLLLGAFLTWPVSDWPLQGLSAMSVQYSVIASEATE	hypothetical protein IF2G_02082 [Cordyceps javanica]
TQW11152.1	MDGYITVTMPNPDSFSLLTGWRAEHTQQIRYTTDRTIDENDVDLFLTFAIPGRALVVRRAVISLCMAITLDPDAHRKAGRQALEERGKPIPETIQKKSLESGERGAQLAW	hypothetical protein IF2G_02094 [Cordyceps javanica]
TQW11154.1	MTCCSGSTAGGNLREGTNTRKGAKSLTSRLVNDTIIILFTRPLSPRHIKSYPPLAVAPRNI	hypothetical protein IF2G_02096 [Cordyceps javanica]
TQW11170.1	MIVGRGAMRFGTSVMVQHTVSKLKSRSITRVSIRVYSFHFASVRAKLTMELARRPETFLALPFLKSAQLAD	hypothetical protein IF2G_02112 [Cordyceps javanica]
TQW11179.1	MVRRNFGGKSAARLLQRVFHVDSLALRGVSLTSEDASVTSWITPHRHHRLKSTLPFGSKVFTVPVTCAGTQ	hypothetical protein IF2G_02121 [Cordyceps javanica]
TQW11186.1	MLPLLQTHRQTVPSANLDCIPHTVNGQPVHDDRLQQERALYQQRSFPIRTLYPHAHFSATGSYDVHASHRGREHQLRRKTPKGTIDAGYDGSSAKSSSGEPPLKQLALPSQPLNALEYQMASARSHQQSLLIDGSGANLPLPTALWQTPGYVTGPIQAQSFQPSSQHSVVSFASVYQPVIRANEYNVRAFCPPPPTLVGGLPLGQLYWQQGLSAWDYQSVPYASAVSRAAYPAVPHSDFTPNLTTPRFLPASNQILRHTPPGSKSNVQNVSTLNYDNYHSHSDFKDKTLSQAYRHYASLVGYIQANARASISKDSHDADHASSRHLIFPKPPRPRRDNTSLSQNPIYSYTPSRTLPSVNFDQIGAQGHQYAPVQQSNRHVMFAGVDQFRAQQNVSNGFV…	UDP-N-acetylglucosaminyltransferase [Cordyceps javanica]
TQW11187.1	MFLLGLSASRVAYSSGTRDLVSIHSLCSKVHSQHTVDLAVGNGLHDDLGRLVVDPATHTVGSTKNFLDDALQVLGEGLVAHSAGDLNDIVKGDGLVVLDVLLLLAIARRLFQGTDDQGRCSRNNRNCGLTVLNGKLDSHAQSTYPVASGLGDVLSDLLGRETKRTDLRRKRRRGADLTSSSTEVARYC	hypothetical protein IF2G_02129 [Cordyceps javanica]
TQW11188.1	MAAEWTVVRPTFLPGCTPIFELVQPLPVDPRLPLLDADGSICIFFKDSFRRQPLSVDCCNTIVNCDHSRKHYAISFLQAYGCCVQFSRRWTAMACRAFASYTSLLEVSLRPS	hypothetical protein IF2G_02130 [Cordyceps javanica]
TQW11198.1	MCQDEASFKTHIGTLDFGRKQGMQRTMRTWLSIRLCVENRERNPGKTTLSPLVDNLINGN	hypothetical protein IF2G_02140 [Cordyceps javanica]
TQW11213.1	MNAAKTYLIDRKVHHIYSVCYTSSSCIISCTRSGHRDFRGWFAVLLKTIKTKYLRCMRPTRLFCEGYRLAQR	hypothetical protein IF2G_02155 [Cordyceps javanica]
TQW11237.1	MAPQPAMRLLRPGKKRATRSLRRRGGSHAPHDYTLAKFRAKDLTSQRIYHTFLCYWTLVLMLF	hypothetical protein IF2G_02179 [Cordyceps javanica]
TQW11238.1	MYRPTLQSQRITTPKHCIIISAVTPHVTVQWPKQKAATMWKLRVPTNFLCTLGELGNSPRQPCCILGTGCFDTIVGIRGQIMDYFSGDLPLPHSKAAWNAYAHSSKCDYALGVNRMTGLARSDTERSRSKVNGSICDRWHTGHKKRCAGRRPTFGRHCSKVASQCQCKRLRWSSR	hypothetical protein IF2G_02180 [Cordyceps javanica]
TQW11245.1	MEERFMPGDHLNLKRVLINDNRRYVRSENVRRTAAADRTIMHTAT	hypothetical protein IF2G_02187 [Cordyceps javanica]
TQW11247.1	MNLLPLNAHRALGRSCISHASKAVGDTVENAALPSLGHELPHSFSAGCFLQSCSYMMLKSMPITILCATLS	hypothetical protein IF2G_02189 [Cordyceps javanica]
TQW11265.1	MPAHDVTKHCCRRPGRRLARGMRDDDLDLGTITTLSYSADPVHGTGRPVELTNHTRLPRTTLYGVRNVYHFSNRQDEPHNQHYRIDSGGDTRKYSCQATASFAIVPRMNKIAFTGKPTERVLDVRLVSIKKTAQKIDA	hypothetical protein IF2G_02207 [Cordyceps javanica]
TQW11266.1	MLACIGLSLMQVSATSCKSPHQNRKIRQRSSATLTHLPYGLIHGNLLPSVTRPAIVGMNPHSSRLYVRLFLLLFNVFLFSCFKPN	hypothetical protein IF2G_02208 [Cordyceps javanica]
TQW11268.1	MMQKEIYATPISRRHRGKGVRPPRGREGAVPGEHACSQREKKQSNSTAYFPSPLRDPLPPPRSRGLPYRDEQGNRPLFRVSNGCTFVGGGAEEGLMGRHRYLAACLYSRVTVLVPNREMRPPKPQLGCTHASALSCFEKNLPICTG	hypothetical protein IF2G_02210 [Cordyceps javanica]
TQW11284.1	MYLQIVTTNIVTINFLQASFGILYYLKCGQVVCHTFPSFTAPSALPVNNHMPDTLVGAPRWCLRVDTRGYRS	hypothetical protein IF2G_00015 [Cordyceps javanica]
TQW11287.1	MTLTLRDGLHDFIDLPQGTERFTLIHLSGYQEDASIQPRTFKDRNYSIESAARYVSDAHMPQTRLTRIEVRYCVESDGCTARLIRLTQASSTRQTLAGHCGDLLVYFPPNNSGQPVIHCGRRRHNLPGLATSVPQKSIALRNPKHDDSLSQISGHQSVCVSLHADAEQYNAATTVSSSGTGTKTEGEAVESRPARLIASRANWTSQPQQYRSLRA	hypothetical protein IF2G_00018 [Cordyceps javanica]
TQW11292.1	MWSSWQASHHERSVYFDFAFGHNEKFDSTVSSLIRVSGSTGHCGQSILKPRVLGDTQVALRQRATSKVTFLFQNGPSISKSIFRSV	hypothetical protein IF2G_00023 [Cordyceps javanica]
TQW11300.1	METHYGWRSGGAGIGLNSASWMNILIRMQKFGRLPKLELGSAPNIKTSHACPLAGERHQRAPPECAPILLRLLTWS	hypothetical protein IF2G_00031 [Cordyceps javanica]
TQW11303.1	MLEPSAICRQEHSDTGVSSCRGLAHLARTTFAVAARPFGGSREPDGPACLNSLPLLRAPCSVLIRRLAGSMGDGTVMISRPAAGGAGIIPPRSSPDQPMYRFQGGQIQALPALPLIYYTSWVHCVSGTRPAQSIYYSTALYTGAMLNPTCIPTNGATSSPCPNQDQTMKSRRVGAP	hypothetical protein IF2G_00034 [Cordyceps javanica]
TQW11305.1	MLSLAMAFRSRPPSIGDVDAQASCVVDACLPRQTQCPAVDARERPSLATVSATLSLHRSSATRNLEARHLLFSVYRSVPERLSSDTNLAVNASMVRHWLLKMTPDTSSQVY	hypothetical protein IF2G_00036 [Cordyceps javanica]
TQW11315.1	MLPACDDTEAASYNPTQSGETKRSVTFSIAHLYSAATTEEHTSSLIPPGRLINNATVAPHQSFLRGGGAPTAAAANNKKTGSRTAKQLIQSSSASPVPSLKGRLVSAEYLVGHRDPSRGEIRLKRNWSLYLAGALSVDEFASFDPSQQAFTTMLRWEPQAAPPVRTHLL	hypothetical protein IF2G_00046 [Cordyceps javanica]
TQW11340.1	MQNAAEETNAFRHSPLARPIAIVHRQIDTLTRPVTAFLDSFIHADGLRNFVSATSNGMPCLASKRSSFPFSINCARYRFLELFPTTSRPGLHLAAAREAVLRHAKYGLLTGQRDNMTARWIEQLSPSFSHCGVILRGCQPYVLPASLPVLYQYLSALFNYTSWRQVASTTNSTSPSDEEVEADMSASPLGWPGWRLLAYFVAIAGTPSLRASLLVSHNTTTTTTTISIPQEEGFLQHHPDGCMKKYFGRQPGSAAAPKYRPLPYKLQGWVDQHIIMLLLPPHPPHNLQEQPFSRCTRGEAGKPPAPDMMPKVMSYIQERGNGIMNPLDVQETCRVPRRKGKRQCSNPHVQSWQLLHTVTSTCMQLGLTTWRGGLGPVPCDDCNVQHKQDRHVSQYYVGR…	hypothetical protein IF2G_00071 [Cordyceps javanica]
TQW11341.1	MPCAAPPRRFGCSGGMHASGRIVSGFCYSLPRQGRFAGKQGSREACLRGKRSLMCSNKIGLLFWGCRRDRGARQIAPVSRPCLTSLELSVASPLGCRRARRRGEGSDALCGLCRILTLYEITSWNNNKGKKKTRGRGAGFYQQG	hypothetical protein IF2G_00072 [Cordyceps javanica]
TQW11343.1	MSWFCCICQVVAIVLAQRRGGNVFRCCCHADVTRPTSHDREPFDCVQMRIWQLDTLLFNLWASCLFPLSSLCPFSSLHIIVRIAAFHQTPYKEFHLAPNFPTSVIKIDNVGTNCASIGSKQAKYIY	hypothetical protein IF2G_00074 [Cordyceps javanica]
TQW11347.1	MQGWRRDVTRRRSKDEQQNCIRNLQCPSARLSIATGPGCSTTAILALTGREGATYWLLSRARACRQPVLAHRPDQFVQAQLFEFFCKWNPYWNCLENDIVTEATADGQSSAFSSWFGMKPHGAVIGSETTRHACFA	hypothetical protein IF2G_00078 [Cordyceps javanica]
TQW11349.1	MHSRCAAQRHVVWQGKLIALYTSKHQQGVAQLCAAQLLDTALRLRRRASRQTASARTVVVRDAPREAGGYSAVRPLDCHPCSTAKGWRAKWIATNQPTWAWWRTCRSGPTSYAWLTKVLLNNPAIGDGRLCYKRGPIVSKRPEVEMCRDLRRWDASSLRMCSGGPRVNILDLLVHSACVMGIFNMTKSNASGLGPLLTASFSLEMRGSRLPFLENRVSHDVRTRRVRCVTVSKGATTTATLTLRRLGGGRRRGQESRDDVEFNGTRPL	hypothetical protein IF2G_00080 [Cordyceps javanica]
TQW11350.1	MQRNAVGVSGGEGEGCVKGQKERSGGVKTVAMVDVGRRGHSVGSHLPACTFALPLPTSLTTACLPACLPT	hypothetical protein IF2G_00081 [Cordyceps javanica]
TQW11354.1	MRSFSRGGTGGEEAKLTWSIKQGTMKAEKRWWRKKRRTFCVFGQYPFAGAGAGNACPKASRCGEA	hypothetical protein IF2G_00085 [Cordyceps javanica]
TQW11358.1	MMLHDRSARAEPSEFFLEQKLQLGVWDDISRLALKGLVELSAFPSPRWQSFLHGKLPYHLTCYLFPCPTPTCTRIPPSNDDKIHLLLFTSESTMKQHSGPLRKGPVTCQYFLSDFSFSLCLVFRLQDFLQILCSESLFANNES	hypothetical protein IF2G_00089 [Cordyceps javanica]
TQW11365.1	MHYLQREWGGLHGGQYMASEGLCISTVDRKVYAAILLSSMSFKIEILLARSCASNPVTHPHSRVGAAKSRDAEGSCHSEPSAQNQPSMIFWPQLPPIDEASLWTTRF	hypothetical protein IF2G_00096 [Cordyceps javanica]
TQW11371.1	MRAGFGVAEEYRILSRTDWEDSGLKGRRSGALTLGAFVKFLTGFLGSGGD	hypothetical protein IF2G_00102 [Cordyceps javanica]
TQW11374.1	MNSCRKMYRTSKVVGSWQLAAWTAKDLPAGMFGNVAFAHFTSLFLPLFVCPLFSRCYRTVMAAVASAAWCVIRWAGCPVLVLWVGMLPTGRVPPAQIRGDLLYYNLFSLSGSLGGSLWYLRSRPRRFCLAANQGD	hypothetical protein IF2G_00105 [Cordyceps javanica]
TQW11375.1	MLIACVLQLYFSGPSPNACFDFSPFYYSTCMISYFLFPAEPCSQHLIANGCTQRGPATRDLSKSLAPPRGQYLVPGPARFRYSRPDRLNTTLARANFCSTRCRLGTYDKLAIPGYFLYARVRLLNRNGRHFDSVAHWSCRIFPLLIRFAPRHVAERPQQLSSFALSLSHTSSPLIVTRALLPSITVSCLFILDGYLIPTASYSQTRTVCALALYCRGRQFCAEKVALANAICNIV	hypothetical protein IF2G_00106 [Cordyceps javanica]
TQW11380.1	MSLARILDVCIGCIRRELTTPAVRSRRAMPSTGTRMSHPWVQCMWPADWCVNNNNPLLSMLISLLHNGSCDIAWFLLILPCPPHPDGERPSGDTG	hypothetical protein IF2G_00111 [Cordyceps javanica]
TQW11427.1	MAAWRCMHGCLAGWLAGSLPNLVHCPLPLAALGTPAQVPFSSSVIHLFHLAFFFSCSTLFFVVFLVACPRRRSRSFRLFSVSTLVCRFSPNTPFNQPSSASSRPFRSSLSLCLRRPRDPEQLYFDSFCALIPFSCDATIVSYSVSGTHQIPVTATAISTPLALEPHPCGPRSLSS	hypothetical protein IF2G_00158 [Cordyceps javanica]
TQW11438.1	MKNILRNYSSHLKENQDTSLSNLGLDTSFPEDLITKLDAASESPNDVGTRGSSVKRQPKILGVFTGQGAQWAGMGKELIKSCEFAVARLTALEMSLQQLPAEDRPSWSLVKTVFEAGDVMEAALSQPICTATQIILVDPYFLLYIIN	acyl transferase domain-containing protein [Cordyceps javanica]
TQW11445.1	MFRGTGETESCICRGGQSLSLSISADRSPQGEAGVAKRSSAVLALPQPRVAARGAPGFSAPMLTGATKQRLAN	hypothetical protein IF2G_00176 [Cordyceps javanica]
TQW11480.1	MNDKRPTPLMASSVFGRALLRWTVIPEPTQHRAAVSRATLVLYIPQRKQRASTFLIAPTLCGEIEQRISSAPRRDGLSSPVSYHLRRFRPALRATRLAASTCLFVKGTIL	hypothetical protein IF2G_00211 [Cordyceps javanica]
TQW11495.1	MGRARKQSAHGSDVRVSLFVVSCPSKPASILFRAPRRLMFIGVLYTGLAMKKEEERGKKKREERKEKESEQYKECEERKLCQD	hypothetical protein IF2G_00226 [Cordyceps javanica]
TQW11527.1	MKGHDAMIPSPIFRVYSNNEKFKSDKSSQIRHTVKDSLVYLQRSVCRNAWEIYAQRWRLPVLCAWMKETKIFGLKKTCDTIMER	hypothetical protein IF2G_00258 [Cordyceps javanica]
TQW11528.1	MWTWSCRTWGRNRGTMQSLSLSMYCYDQCCDTCTITMIVLHCRIRRTTQIRDDKDRKIDSQHVKLRVLKPDIIRDFSEKVLGGTMQTRREYRVGL	hypothetical protein IF2G_00259 [Cordyceps javanica]
TQW11535.1	MRQDDMDGDKRREKVTSEGRRSSLYASLERVAYYLPGATTIHTLSVSLSRMISLLAFSLLPCFLAWGLAPKVYPPRGVESQATRRGRRMMAQVGSQVAGTVLACSVVSTHAQMPIYLPTYLPGNGEWGTGQKRKRASLAA	hypothetical protein IF2G_00266 [Cordyceps javanica]
TQW11536.1	MHLVRGSAEDTIFRSCACVRTEYMDQRPRPTTAGSQYVQVHSYLVRTGKICRMHLIHGAATSSMVVKGEGVAWLPGC	hypothetical protein IF2G_00267 [Cordyceps javanica]
TQW11547.1	MASIPGNLEVNVAHQIRLGENRSGIANPETRCTLSDCAMLRTPVERVVTLLDRPPDLELRRSSYVRRGWQLGWRRLESAMAPQSMP	hypothetical protein IF2G_00278 [Cordyceps javanica]
TQW11558.1	MMGWLMWSLIGCAARRALGKVAGNGGRARVPRTQTGRAAVEERKARAIEEGGWCE	hypothetical protein IF2G_00289 [Cordyceps javanica]
TQW11559.1	MKRKSCGAAGKKTRHTMIVLPRTIGIDREPGGPEERAQVVMVMVPNYELTSKQTCNSRCT	hypothetical protein IF2G_00290 [Cordyceps javanica]
TQW11560.1	MIRRIWKSCYIRQQLFVPNKNLTVKRTQQANPVSSPGCGRRTDALFVLLPAHMHVSGLIPSPWASNVKEECECEKKAHSRFWNDAMEAYKG	hypothetical protein IF2G_00291 [Cordyceps javanica]
TQW11564.1	MLKSLTPPTAIVSPLYTADRSLRRPLATTTTATTTTTRRNVAARSIFPPPTFKNTLGRTLAPASRTTSPTVQGIPDSMACTR	hypothetical protein IF2G_00295 [Cordyceps javanica]
TQW11567.1	MACFQRREVFQLPDASTRIRQILGQKTALNCAPPLALGLWAVESQQDGSVYIQTLNHRGQRIEEGVIPSIRARC	hypothetical protein IF2G_00298 [Cordyceps javanica]
TQW11592.1	MARATGDAAAAAALVLVKTWDDTCTEYSTVRTAYMFGGMPVLPTVQEWRCSCGWCRAIDASQHNDGLHLFILSEIHDTREPVFVERKPEPG	hypothetical protein IF2G_00323 [Cordyceps javanica]
TQW11599.1	MESLQKLACAHAFLSADAAGAAVVLTARDRKETGQNDGAQPCPADGAWHEATRVSEAMGDRYQRRQYPETNRGGKIDDVSIEANRARDLAFRAVIITSSSRELLLKDRACSAARQGFMPKCRDHRFCK	hypothetical protein IF2G_00330 [Cordyceps javanica]
TQW11600.1	MFRLTNIDVHISRKVGGKRIGRAHQAAGAGRSILRGHPPDHRTMHLALQRLFPRHLIFLLLPVRPFCKNRTNDLPWKLQPRLVTRRERLQSRRHKRLVYIAYIGVPAGMTAATRQRQAEIDLTSGSFGSHASRQPGLSVARGLVLGSHTSGA	hypothetical protein IF2G_00331 [Cordyceps javanica]
TQW11635.1	MEPTKSPQLRISQARGAGLFLQQRSTIKPARRRASTNLSVAPLSGSEPTAQAPTDSKRRPLGAGLSLQVHVGECRSRNYPTQSAPNEPLESVPYKYFTFLDPLNKEFYPNLRRPRRVSLRVCSRRVSPFFPYSNPPPFTLPFSSSSTSLRHQSPCLVTELARLIALVPPSQFNQGQLHATAGRPPVCRLPPTSLTTTANGNAHRLQKLYTIGPNSC	hypothetical protein IF2G_00366 [Cordyceps javanica]
TQW11654.1	MRISINRVRRVDLRCPEGGPPCGRTGPCRESSATYVQDIGLDARNARGEEKSTDSSGTAEKGQTESTGQQVSLIHLSRRPRRFAKCSRLIQRQPESKIQHPSSRRCQPIP	hypothetical protein IF2G_00385 [Cordyceps javanica]
TQW11658.1	MLSELVRVVWWPLGWDAFHFTVRSLVTCTKGGVSSCAVCLPVSTVDEKGTGKMQEASHRAQVCTPYCTGLCVQVVQSKPWPCLAGTWIVKERRPWALRLRCSGTSRRCVACPTLAFYCILLGRLVGRMHCLALPCLALP	hypothetical protein IF2G_00389 [Cordyceps javanica]
TQW11659.1	MTVVDPTVCCPSWVSSSASRARLRSPQMLSCNEIVGRANRSIATNANPRSALTDLVAVSSAYDRNGRSFESHLKNKFLSILGFFFYRLPTSSRSNSITKRRTMPGSATRVKLCYQYNAHY	hypothetical protein IF2G_00390 [Cordyceps javanica]
TQW11660.1	MSLTKEREQLLPSPAVNTHPKAPGRHFAVVYRGFQSSSFFPFFFYHHVLRAVIF	hypothetical protein IF2G_00391 [Cordyceps javanica]
TQW11661.1	MREPGLGERESQREEPMVFLICPRRIYIVMFSLLAILPIIVRAGTALRMALRRLFICGHCSLVRSCVQAVAIIFDFHREELYCILARSKCVLVLLRVHRHAEGPSLRVAYNFDGQRLTFLICIIVWPR	hypothetical protein IF2G_00392 [Cordyceps javanica]
TQW11676.1	MRACARRNGNVANDAASRLLATLKRQGRQENEKKVLMAYNENQGVELWLRWRRAKKKRWLNAIYESGRAEQGIRQGSRGTRRMKGKEKEEAIPQQFKSEERGREEEGGGFRRDGKRSKSGRMREMGGMRRLRRGGRREKKGLEGEDETSLGKRIGDGSLGLGWGGGEAGELVATSKYLLTDTGADRGLGLAWPGRSGWASKKEWANEKNEQVGGATTWVPVRLGEMACQTRYQVSSYAPRPSAFRLCKVLISTNLSNQPRLGYLRQAGSWPAGCPKTTTRKSNFEPSRTSLAGSCQRTNTYGKVPCLPACLPTYLSRYTAISTYVPEHLGVGR	hypothetical protein IF2G_00407 [Cordyceps javanica]
TQW11677.1	MTALCTDYLDRSHQLPNPHHHNTPPTARSPVAWPPSPFDFAPIISTPANVSCLTYRQARQKTTTTTTTRYPLLHLAVFKLPVHYTGKRSPTRLSSPSPGLSMARPETLITPQIDLVGGALPPSASSLLNASRRSGTLPTFLYLAPLLCDAMTVQSVYMNFPRPLSEPGRPVLDKGNACD	hypothetical protein IF2G_00408 [Cordyceps javanica]
TQW11683.1	MTAHLPCRFIGERRKKAECCRLSTYVCASLSFMVRGGAWRSWPGCDGAGACEDRYVTCGGSTTTKIISPIFICLYMDTRTIFSALFLPVKFWLLRFFLPGLTHAWESLMAVIVHAQSRPIPYIHLT	hypothetical protein IF2G_00414 [Cordyceps javanica]
TQW11698.1	MSPYRRLCEKTCPGYSISAHNHFVRVPLESTLSNPAETALYTKHGHTEGTTARH	hypothetical protein IF2G_00429 [Cordyceps javanica]
TQW11703.1	MAYDYRGLIILWWQTTTPYTFNLSSVGELRLFFPFIDPVEVGGPRTRCRGERSIVDVVKCPGLRVRQYISQSWRAPALLPTYQSTSKYSVRAVLSVVAPSGPEISGWATYKPQLFHAVHIIN	hypothetical protein IF2G_00434 [Cordyceps javanica]
TQW11704.1	MVRHDSGLGPLGWPSPTCCNIFSSTPSRLRGGGSGGSGSCAGRGLVPLSLGLQLALGWAAKLRAKPGPARAWLPAHVKPQQAPRLLRCIWCLPSTANDSGLAPSCKVQAPQLVHASRVLKPSIIIYPHPCPPLLPPPSRSPLTQYSTRDGNRLPVLTILGHAVHLLVPRSQAQASSSLTLLPRPSAWVGFQNSSSVSRPARTRGLLLETRNSMNNAAPL	hypothetical protein IF2G_00435 [Cordyceps javanica]
TQW11714.1	MDLRHGLVSGLSDPCYVSKGLPRRINTVSSVDNVSSYDVHLPPRCFLFRGFSSSFFLFFCGFSYENGLTCVMP	hypothetical protein IF2G_00445 [Cordyceps javanica]
TQW11722.1	MEALLRNDEKRPEKTRGAYDSPASWQYRTRKSRDTLFDMSFFGSICFFYYRNLIGISGWVSFYICVFLLRF	hypothetical protein IF2G_00453 [Cordyceps javanica]
TQW11731.1	MYPTNRNINYRSIVDDSLFSKAMPTMTQRRHVNRPKDDHVRVPAQPSLNLLLTLPLA	hypothetical protein IF2G_00462 [Cordyceps javanica]
TQW11740.1	MRNTAAGAPTHAKLHSTPACLASYYVASPTTERVFHVSLSRRKGCLFFEPLIPRTTQRPCPIENGLCRLVPQPHSTVPKTRCCSPVQG	hypothetical protein IF2G_00471 [Cordyceps javanica]
TQW11755.1	MPASLLTTDTTPKDGQRSSDPCLASVMPCETTAASPRTRLTTSSSLRAPYRRYYYHYYYHHHLQCPYRASALGPHLRRAAHRRGPRQVRW	hypothetical protein IF2G_00486 [Cordyceps javanica]
TQW11756.1	MAFPIVPCPRLSMIRMQPQPTLVPICLYIRILALLPIPALVLHTLLKPRSYPNSPHHNWLHRSLALSRLCWSPVFIREMPAYCTQDCHYFYRTALRGLNICTTVSPLYS	hypothetical protein IF2G_00487 [Cordyceps javanica]
TQW11759.1	MSHQKRGVVGKQERHRLGTAQEKKFLKNNNNPHHTSNNRERSVQARADQPPVNGIRAGLDKGGLTKL	hypothetical protein IF2G_00490 [Cordyceps javanica]
TQW11763.1	MEGKIPIKRRLIRRQHTSIASHSLKKLYRSLRHNQSSSQRRLRPEGTNSGRGNNLLNCRLRGDRSTGSVIKVVVIPAKLGGLITGSSSIRYSYVQIDKTYVLNYVLRLDAMS	hypothetical protein IF2G_00494 [Cordyceps javanica]
TQW11766.1	MTPTLDVALQICDSPRTAPAISALIRTSLWGRAPPRDPEPVMLQFRHPFYASHPVVSRPWQARTSRAAAQDIATELGHCLEVIHPGKSAKVFRAIHSETRGHDAAAPSEDESRHWQLTSDFHDSLPDKRRRQKMTSREPILQESGTATNAPEDGQLCNWRNMVIVLAIAAKSQHSVTKREGCGLFRRRLKQEVDVKVPFPGATLHHGLKVLLRGWRSRLDLSHDKIRVLLEFGRRIPKFCRRKVCFPDAKCRSEPLIKWQQKVFLARHLIMCKVRGPRDEQPR	hypothetical protein IF2G_00497 [Cordyceps javanica]
TQW11773.1	MPAWHGANRARASVFQVTTKGPEIPAGRAGSGTNAQLLSNFRRAAEEDGVEKSMGHLSQQSQANRRKPELQNSIWLPKIAVPRPNMRSEPPTVASEATVASEACSTRTGTDGYRRRTLANQI	hypothetical protein IF2G_00504 [Cordyceps javanica]
TQW11774.1	MERRTLAVWDRDTNVSKKECGAVVAAERVGWYPTRRRWAVRRIASTPAQTSCARRRGCKTDAVHLAAQVGQARRQEIESTAIRTRDGNELDARDARRGGRPTRAGYLLIATRLVVGSRGGYGRWVVKGGYTRFARLTLSGARSIGRRLGSRKRIREGGGSGGGCGGGAADGGSGGWWKVADEAAAERYEVGAVLLVKADARVMGDDNQKGNDNDNEAALCGGGGGGGAGGGASWPLLGDEARRRPGEGAAKARDCRLILRTSTCGGLQSASSRVLRHLKQSVGKLDGKVPLLPGRTVPLAQSEPAGEGRGQGARVGRREGRDGGGGGGQGMRIRNSTMRRVEKEN	hypothetical protein IF2G_00505 [Cordyceps javanica]
TQW11777.1	MYRRDQCECKESMPSDTIYMHASFFIVSMACYMHCHRRANGDGEAARLGKHKKKKKGLHARAKSNGRIATSENTK	hypothetical protein IF2G_00508 [Cordyceps javanica]
TQW11785.1	MLLSNIQSPLFYFLGIIQFPNIHYSRQADSIRSYYLANCLDAVFNSNSPI	hypothetical protein IF2G_00516 [Cordyceps javanica]
TQW11799.1	MQPCRLEEGGATVSRPFVTGVPAAWLAGAKEWVVEMMCVTVHCRIIAHT	hypothetical protein IF2G_00530 [Cordyceps javanica]
TQW11800.1	MAHMITWDCSCWRLRTGSCTIRADVSCLPCQASALSIIARFIDGVTVVRAATQGPLRHLERAVNNMILLTSSSHDFLSLDRGFSLRDPLPNYQSCDDGECADMCDPTGVD	hypothetical protein IF2G_00531 [Cordyceps javanica]
TQW11803.1	MLHTPSIPAELRTMAEDAWQDSRTASYRYPRTVAGRDGSPVGRQTCTIAEFGWYLFSLGRSLTTSMGNSLENTMLPHVEYDSTMLQAEFLLLPAADPLT	hypothetical protein IF2G_00534 [Cordyceps javanica]
TQW11804.1	MVVACAVNGVAQAQSLLTHRLSCNCEFVQELGSLRTLLVGALAFFVNRCDGYDFVHVLPGEQTAAEHRAIRQHARTSAKESPSSKDFGQGTLFRKYDANKPARCKLVPKCSVMPTKN	hypothetical protein IF2G_00535 [Cordyceps javanica]
TQW11806.1	MVSLIRTRRVYVPKIGMKQEKKKKKPRTNLGVRKTIPGRQYANATNHVPENSESMKQNITSCHVNENKGNKKENQR	hypothetical protein IF2G_00537 [Cordyceps javanica]
TQW11815.1	MEPARSNDLVLSFLISAFRGALFVLCEVHVCLWTLDWGAKYLPPTSKDLGMLLRWPATSTDTIMHS	hypothetical protein IF2G_00546 [Cordyceps javanica]
TQW11817.1	MFVRLTTVDDDNFRSQATAIGYGKSGSFLSVQVTPAASSSSSSSCASIRPFCGLRGRRGTRHLSAIGQRILRAGDHGEFATCRLPGRAEEGVHGCAGRYLDASVDCIWMDVGPVTGNRGGWMGMPRTDIGRPTSRVPLGNEEDGSHLARLL	hypothetical protein IF2G_00548 [Cordyceps javanica]
TQW11821.1	MLGSGRGLATEINSRNSDTRGTLPISTSKATFCKAQDCPAAPVESGEGDLAATEGICLAKLQKHARRRPRR	hypothetical protein IF2G_00552 [Cordyceps javanica]
TQW11823.1	MQPRPILKIVKPKQAVVGSSFFFFCFSKTLSHPLATIQRPRSPTRSKHQKKAHTTHYPSMKDGLRLTSAILPTALSVRITRARLTPHSACQLASLPVYRLGTSPPAYLQSPHLSTYRLLCTDTCIEPCTLPTVSTWSPAFTKQSLNLSIIPASLDNQVEYVPFGAALRHLFAADPSRPKNPLQIRISQSRNVPPPEKGQKTAKITMIHQLDFDAVVPRGFMVPTQVRNYGSAGQRPTDHPPWSSSTLQKLPLYMKTLPSFQSRARARPLLHGH	hypothetical protein IF2G_00554 [Cordyceps javanica]
TQW11826.1	MQKLSGNYSVRRRVLATTTRCIQRGPPHFRRTKARSLANKATPAVLSRSVSSLPCALCLVPSCLMP	hypothetical protein IF2G_00557 [Cordyceps javanica]
TQW11838.1	MEYGMISLQTITSQPSVRGAGALCDGDGARGSAASSTGMYVGSIGHCSPMAQIFHRSCCAHASIDQGPILVARFMSRKPFLERRCQILRTAGSEPRGVE	hypothetical protein IF2G_00569 [Cordyceps javanica]
TQW11848.1	MEAGSSAKQQCKCAMQQMFRCQPGRRGSNRVRVQPPPPSETPPQAGRQLSSQVSVVQWLPDLGREQRNTTGGCSEARRSRKQSSVGGQYRRGMGHGPWYSGEERSSARLSEASYMIKRDGEAGKWLGLMDPSLGLFCKTQETQEAILQPVGSERRRCWIN	hypothetical protein IF2G_00579 [Cordyceps javanica]
TQW11850.1	MAPLKVVNRHGLLPCKLKCMNGCPVAHCRPATRRLAWCLFWQDRGRGISRRCGIRASRRARLGTRAAGLTTLAGALISVPRITVQPPCKRTQADVFLLVRTS	hypothetical protein IF2G_00581 [Cordyceps javanica]
TQW11851.1	MSAVPSDVSALTVSFSFLYRPASSDERARPSPLHSLTSPFVCELTYRFNLGLAPEEVDIRDTRRQRQRRRRRRKTSGPVTRTVLSSLTGKSPTPALRTADFS	hypothetical protein IF2G_00582 [Cordyceps javanica]
TQW11852.1	MHGRKVKCKSKSKSKDDDTVAAAALLLPGVMYIYMLHAANHLDDQVSFVLEATLEACLCPPPRCIYKKKKGPLGLGFGVCAVCCLALQVRRAE	hypothetical protein IF2G_00583 [Cordyceps javanica]
TQW11854.1	MGTDNVHSSALTAQFAKRFRNDIKPWRPCQYRFPTPRQHRLLLQSLSYRPRGGGGGMKGNGQRKQVRMPVFESRSIKRPNRLYTRCPSHRLQTDRQVRLSRRRRPCPDAASQCLSLPGKACCRQVSESIETDRGGKRTRRARGPFRDSFLRGIRGGH	hypothetical protein IF2G_00585 [Cordyceps javanica]
TQW11869.1	MSFSHFDPCFAAVVVFFLAAATWLAQVAVARRPPLCSSRWLRACCSSSLAPPSFFAPLRFLAAIICSRASPTSTTPPLLPPPPPTVTCAGSHSLPGLAARSPPGHATTSTTHDRLLFPFRTRICT	hypothetical protein IF2G_00600 [Cordyceps javanica]
TQW11880.1	MIQDSDASKRRASVCSIAVVTQGAALVAKHTRPTGPASPANRHNGLRLFGPTVLSRHLLVSIHSVPARARIAGSFAPTSFRGEARRTLHEAVLRFCCPLATVRKGPTNIVARHHQSIHQLGSQPTARSPALLPVP	hypothetical protein IF2G_00611 [Cordyceps javanica]
TQW11883.1	MKAKQSCLDGVKKGSRTCSPHSPPLPFFFLVLRRITAALAAVFQHAPYCTQECSYVGLCFKSTLARHACASSTLIIRTEQIFCRQAFSSTPPPTPPVPMPMPWLSCFTVSDFLRGSLRQPTHSEPFWVLFLDPKLPPDQEKSN	hypothetical protein IF2G_00614 [Cordyceps javanica]
TQW11884.1	MRTDPVWEILACPTNKKRKYRSQRLIDDRFQERNTSSSMNKAAGVFPGGVAPPAIG	hypothetical protein IF2G_00615 [Cordyceps javanica]
TQW11893.1	MTLFTLYSVGLNNPPAPPGTATPPTSNRYATLLAPPTADQSPANRIINPRVLAITLVLCFRLARQPHYHSVSDHMPTQPVFMHVHLDLAVPKLLRLRYACKPFLTYASS	hypothetical protein IF2G_00624 [Cordyceps javanica]
TQW11897.1	MSLIASAYAELPRLRTITISVAQRSTWAHYDDCYHGAMRTRTSSPGKTSRQIKMYNASQK	hypothetical protein IF2G_00628 [Cordyceps javanica]
TQW11898.1	MVILHRIFGTTGPGANVSCSREKATAVGGGCFETFSPIRVTELRLVTPDRTKWL	hypothetical protein IF2G_00629 [Cordyceps javanica]
TQW11904.1	MNDSNGYTDMVHKFTSEPLFLAHSFVCTEYILSISGPVSICFPFRVQSAECIESITGLLDARRSSEPFVKCILQLSESTGWSVASRVVRRVVYAGSLDICRTRSFSPSAPAHPAIRQVIKCPCSGTKSRASIHRIEMSDVRKKKLPSNTDDLVGPTAT	hypothetical protein IF2G_00635 [Cordyceps javanica]
TQW11910.1	MHATLRGHRSETKFLATHGRAFHRYGPRSRSLTSFCTIRCFGVFYNSKGKRFSPPSLSNDSCPPPPPTTPPLPNPKARHERADRKRISRLSGSGDGGGGQRQLFQLVRGSGMAFLAAIAEKKFIPKRPLLVCVGRAEHSRTPKTRLLSLWRF	hypothetical protein IF2G_00641 [Cordyceps javanica]
TQW11921.1	MQQNKRGKRIRRRKKKLPIINPASVSRRLLGRTDNKQAHGGLVNSFWLPAYLSTYLYLETYLQATTAACLC	hypothetical protein IF2G_00652 [Cordyceps javanica]
TQW11935.1	MLGTRDCCGVRTKESPSFLSGCAFRRGRWRAKLSDGQFRPLSISRDQGSFDCCRFMQWAIVAYFRTPRLFGEALDL	hypothetical protein IF2G_00666 [Cordyceps javanica]
TQW11949.1	MNKAPNQLTTGHSNDLSTTPLAQGGCVKGGTTRRQGVGYHTSFFQGWCTADISRFWVALSTVVLLTIHASPSSKDALTRGALDAFTRTVMHEDPSCGLVWAAACRPCLLIVFIFDAYTSSETSCRYQSGNKAQGAGER	hypothetical protein IF2G_00680 [Cordyceps javanica]
TQW11950.1	MVRQARARVLSKHPANVSKTIMQLGQKPDSLGNIDKAEWAMQCNAHGRCANLHQRGKEVKTARGTARAKLETGCNLPMLRTACKKERRLLQDMHFTRLRDTRPIDELPELLLPVMEGTEEPVRPFSSTLLQYRSRTRQNEVVFTTQYTAERLSTTASF	hypothetical protein IF2G_00681 [Cordyceps javanica]
TQW11951.1	MPFLAANTRLFLASFISVCPPLRQQASYRCASATAFPGSYATVCERSSPRRSLRVAPLLKVQ	hypothetical protein IF2G_00682 [Cordyceps javanica]
TQW11952.1	MSVQVTLSSPPRCPLPPPPSARRVNAVPNIPVLLLLACELVSRYAAERREREHCAFVSCLDSRCIHHQATLRAMKKFGHLQSVPRSARTICERESVDAVSRTLYFNRPITN	hypothetical protein IF2G_00683 [Cordyceps javanica]
TQW11953.1	MDAHKKVKILESQLDQTLCFLSPPAGGTYQSTSSPLSRLGDKGLLLAQLADPSLRDTYRVPTDAGPRYLSTYGLPTSCTPFLTLGIWAIFSLSVCFFGRNTQVADCCGGVKEKKRKKREKSFAAAAAVATVAYEWATAAIAATVGTTATTKNGRAFIES	hypothetical protein IF2G_00684 [Cordyceps javanica]
TQW11954.1	MNNTAGSAVKKIEFRRPRTIEIARLLETPGTRQCQNRRIPRRSLSRAAEIINASRIAELSHLQSHSCPSHQTLKKKRHILWWLAKHARPPSLVGKYPLISTLRTPPQEQIMG	hypothetical protein IF2G_00685 [Cordyceps javanica]
TQW11955.1	MKIHGKQRRRPWLRLRSHAASLKQLRCSLKATYPVPVYLIRQTKQPYVDP	hypothetical protein IF2G_00686 [Cordyceps javanica]
TQW11980.1	MGTDVWRGSIVACSNWLRVWTRKRDGAGEVSSYSGSARAMCFAQFVMSLQDGRKSKATKPRKLGNQLE	hypothetical protein IF2G_00711 [Cordyceps javanica]
TQW11995.1	MKAAAILFSALAAVAVASPFNLTSLRKNDTAPAAANGTTPITLTLPYCIRNCNLDESIKNSTTGRFISDALFRCRSRQGIARLARYCVATNLCGGHSFWDKVAPGYDKICYINTSTPDQ	hypothetical protein IF2G_00726 [Cordyceps javanica]
TQW12014.1	MLPLRRSSVSAQRLQRCVNGYVSGLRSFQRWAFIPSPSCLWFAAFPSCPTARGPGRQAVGARLPSAGL	hypothetical protein IF2G_00745 [Cordyceps javanica]
TQW12039.1	MFSSDPGGRSSSGHGPCLDTSGQVARDNPKQKLHGLRSMASYPRLDCSQGKLRMGHAIGQICLQPK	hypothetical protein IF2G_00770 [Cordyceps javanica]
TQW12042.1	MRVAEVIAALLSQVHVSGLVRRWDASHHDLSPSGQVAGQIKVRDWASERSGMRHVAAPQRAVFARADLMYGRCR	hypothetical protein IF2G_00773 [Cordyceps javanica]
TQW12053.1	MVCARPSHRNTHIIAQNRERETLCIAELHSTCNSRLSCVFNLHRASGANHAVVPDCKASGSILTLASMWTRQHSLGQQNDGLSAGISTLDVK	hypothetical protein IF2G_00784 [Cordyceps javanica]
TQW12076.1	MPNAAAFATLPVVSPCVPAIPPVLWAYQGTLGNLQRQPDIGLRGCPSAHLSQGKACGKTSSGPTTASSSLLYPRYVLEADSTVCPRAMAVVKHGPRLGCSNCVTYLPTCPSTYLLPRELYSIDTTES	hypothetical protein IF2G_00807 [Cordyceps javanica]
TQW12079.1	MRQSRSIFLKESYTSRRPVDPFFSTGGCVAARQSQKNDSSPAPTHDPVRQVRRSDNEAHLLRRASASSTQTGKTLFPFLDEKREKKKTLPPRYNGRSGSTLRGFFFYPGLPARLGKTPPCTARTILLFSLVLSRWIIDKDAGLTGAAGGRDAERMQREMQRGGDASKNVPSSLRTRQFIAQSIR	hypothetical protein IF2G_00810 [Cordyceps javanica]
TQW12082.1	MLLLIMSRSLLQDVAGIRLAKHFRRTYRGVAFSLAKRLEAACQRCPMLCMVQVGPHVVGNRC	hypothetical protein IF2G_00813 [Cordyceps javanica]
TQW12094.1	MEEYGGILVAVRLKRASGLSGPFLGPSYSVPTGYLSGIGRSQVICSVGRCGILAAKTNAPLAHSIKGARLRRETYMFILASTLHPTMSWNGPFISSCWFCRTCER	hypothetical protein IF2G_00825 [Cordyceps javanica]
TQW12096.1	MDELIEKKVSRTMRQLHAPFIPGRPSFESPMPIPTRPLMELSLLPPSSPLFHLCCIRPHALLTMRVKPKSSPRGACLAKMVIIPQNFCERRWFNGATPARDAIARPGISRCAAGFVALSSKRRCIPRPSAAICEVYCALSNMSCTRPSETSVVPSMAPRGGHKALARHY	hypothetical protein IF2G_00827 [Cordyceps javanica]
TQW12105.1	MNKKKGSGARKTKLMEGGSCCDGGRRSRRRRRKGKRSKDGKRKSSRRTRIAPRKEGEKEATTKKKEERRKCQARADYLERNMYTHTWTTAIPWPELSTAPGY	hypothetical protein IF2G_00836 [Cordyceps javanica]
TQW12168.1	MYSRRSPRQHVWWHLVRVSAILGMNDILALVCQLETRALSLSANSITSKAVVPNW	hypothetical protein IF2G_00899 [Cordyceps javanica]
TQW12172.1	MPCRNNHLAGRGLGLIHSGVSVAIRQTTGWLGQSRKRTVQTRHEQNFMNALFVGDPASWGFRCAWAMYPRASRSKSTLFVISTVVTTQYDCMTL	hypothetical protein IF2G_00903 [Cordyceps javanica]
TQW12178.1	MGNQRGRNVSVAVGPSSFAKPNLEKKIPDRNVTALMAMQLWQLPRSNNFAFYNNDTQQVTQSRTGAACEAKQWHFVLRFLWPKLDVSVGWTIGKASGSGGCGVGGLDVIVWDRRCNDATEKGRTPEVYRPSLGTGSKMRRASMCQKQRRVTSRTICMDNVYRVLRTGQLATHPATSTEYVVPGETREEADRQLQLLEAFSLVNHKQKANCVSRRRYSGV	hypothetical protein IF2G_00909 [Cordyceps javanica]
TQW12180.1	MNTDNYRSESSNSLTIITRIRSAYQCVFRVSLCYYHNSRNKQTHFQSAPSHVSIIRHARTQRRATEHEVRIQIKQTLDE	hypothetical protein IF2G_00911 [Cordyceps javanica]
TQW12185.1	MCLSVRQLSQCCICRNWEDPGCPFLLRVTVADPVTLHTSEHSRQRYVKILAIPPVLHIPQSTVATLTWQAKATRSAVCLAPPVQGGGVSNCERRPWGPKQGCCGWKTAPLHSAQAKPRHYEKLNDEILHWLDAIEGSSQF	hypothetical protein IF2G_00916 [Cordyceps javanica]
TQW12190.1	MCQPGLYRRRGSLCAESVSQGKYVGVELVLPAKGKSVLDIKISHRLQCKKSCHSISSMK	hypothetical protein IF2G_00921 [Cordyceps javanica]
TQW12192.1	MPNQSGPTEIKVQGQNCDLSSPCVQGWNQARFPHFVPQCGVAVKGGFSCQSLFCPFPSRESQLWLHCPLCFRLPSGNSHYQPNMVEASVAEFSAHYTTSGIRLCSALSRCACI	hypothetical protein IF2G_00923 [Cordyceps javanica]
TQW12196.1	MACCTQPYTSNNYRSGYHPGFLPLRLGSIVRAGSTIRGYILSIYRMAGWDLAKTRRGKVATADFMRIASSTSATLLKMEREPALSLHLVGRTNWALGRYPCLAPPLLLSNNLMEHHNKASEKPLLWSMSLAGRQLNMQKGEFSWILSGQPAHCQVPPTSVRLVNSCSN	hypothetical protein IF2G_00927 [Cordyceps javanica]
TQW12205.1	MRLSNRFRGRALLLRAMELRFCWGRRASVDAAARLTKCAHCSESSDESPCRHHLEMKGKLLVAAQAMAVYVMFETFGWRRARVAHGGLWWLK	hypothetical protein IF2G_00936 [Cordyceps javanica]
TQW12210.1	MQADNRCSTRVARALVTQLREDEALLELPTFITVALVVRDKAQEQSPPKHHTGSQAPLKDEHRSLTRCAPDSRQRDTTSRPRDTTGIFTRNGPTEFDDARCPTVPARFNKIGGV	hypothetical protein IF2G_00941 [Cordyceps javanica]
TQW12217.1	MRNVTILCCVVLYFQLWPFELGSFLGLCRLARLNHINNSQIHELIPNSPYGPRNTLIITEEVTNKVSYDVGVISLNYTVSLERFTVTTPRVWRVSTFTNCHNEPAGIRRKSTPSLSTGFDKGGALTLNVLSRLLEDISVVCRSVLAWGAELRVRRHSVQGGRTFLIVVLDRHHIS	hypothetical protein IF2G_00948 [Cordyceps javanica]
TQW12222.1	MAERRFAWLYILALCRHFCPALLIHGKPLEETERRGRKNKIQAPNPPFSPHGEHYLFHGAASEPWQVSCEESGPAVRAGHGLCFFADPVGGALGYRATLYV	hypothetical protein IF2G_00953 [Cordyceps javanica]
TQW12245.1	MDLNLCSGGGDTKSAQLVGRCCCVAAPLSGHSPRLCITKLHVLAYSGQSCELDENQELCAENSDGDLDSTSSQILHLP	hypothetical protein IF2G_00976 [Cordyceps javanica]
TQW12259.1	MADFLPCTSLPCLHTGNTVAYPAVDLLTVIKGPFRAFARKYIFYMLRRHACPSWLAGPAPRLCCSILIIVAIIIIFLPL	hypothetical protein IF2G_00990 [Cordyceps javanica]
TQW12275.1	MGHLREEPSCDGSCDVLDGGQDLLLSRESHSAAKNTPNLPYFRKATFPRILREYTGLGCALVGPIVARHAQRISSTALGY	hypothetical protein IF2G_01006 [Cordyceps javanica]
TQW12284.1	MQQHQQQQHKQLAGVTHLPSPSPACWEGTRCCLRASLNLVFFFVPCVTAHPIITGTSERHTRDVSIKRAGITASGRRWGARDGLQATSSSRGSGRRNTDSDSCNARYAYVGKEG	hypothetical protein IF2G_01015 [Cordyceps javanica]
TQW12285.1	MASHARLVTLVLVAALYPPIRPLHERIVPPSPSFAATAAAAAAATTIERNHRIFQVAMSGRIFFFREKSPVSISASSTCPLHDDHLFRPAAATGCWHACSYPLPRPSPIAPSQRLSSSE	hypothetical protein IF2G_01016 [Cordyceps javanica]
TQW12300.1	MEEEPRKRGERRITSPCQHVSGLPGRHNANPRVYSTWILLLFHRCCGWRSCIDYRAPLFAARVAILCSGATRSSDERNVTARVHSGAFSPVFFFSWAGLVNSSRFWSGVKQGDLAPAN	hypothetical protein IF2G_01031 [Cordyceps javanica]
TQW12301.1	MNVAWRCSPLCPKPTSYSSSRNDPADQNYRSSLVVSKMCSAAVTTHDLVMMVRMPSSSTAPVAHGHLAQSPCVLYSQNKKIAETEGPCIGFWFRQAATWYSPQVIHHITSFHRSNLLDSVQFPTLLTIFSLCCQLSPLQFAHIRAISSQAPIWLQQLSVDTRYARAHGRFRVIQPKSFFTALLWHVK	hypothetical protein IF2G_01032 [Cordyceps javanica]
TQW12302.1	MSGWSTPQAALVAGVMCRPNPIRTRHHHTRLYTSIFPFSVTPGASMAAICRDDLERTKSVRVFSFAWRSKWIVQIGFYWYQ	hypothetical protein IF2G_01033 [Cordyceps javanica]
TQW12306.1	MQVGDESRRTRGLIVGDFDKNYSGRCSETGQAIDYGGIRLLAITAAIAVTRCLCVLWPCGRLKALEDQLPALL	hypothetical protein IF2G_01037 [Cordyceps javanica]
TQW12309.1	MTCHEPQARACMAMLRWLDMVSRVEEEGKANVGPGWERIIPGEWAWLGCNGSQVLRSENGGCAARLWINESGNARERGRGTPSCTVEK	hypothetical protein IF2G_01040 [Cordyceps javanica]
TQW12312.1	MIRIGTQHHRPPGFGRGSLVAPIQTLESLIFSHNIGAESLSSTNAHDDITLPMLCLPSDLSCSRQHSCMAALGRFAQSPGRNPAIAYPPPVDGA	hypothetical protein IF2G_01043 [Cordyceps javanica]
TQW12349.1	MRPSKIVAKNGICCLWCQKGRHYWIREAKGRGHGQTCVVATEITTRGSQINGCPPAHTLLCRKNIITKTLVATLSFFETKTPA	hypothetical protein IF2G_01080 [Cordyceps javanica]
TQW12369.1	MRDGFCPRMRPALPPSVGCVAVPLLMAHRLVLVAKGSCQSCTTTAFHDHAVRQSLLYAIPGPLLTFLCGRSRLWNHSGGLHAIQGHDAVRCELRCTCSFLYNRGVKVQLVTLWDALKLKLPGI	hypothetical protein IF2G_01100 [Cordyceps javanica]
TQW12378.1	MSVKTRSILPFFILDNNECAQIRRGSENRRGGGCQVASARVGGSLTRTAAWQCECERGFGASRPW	hypothetical protein IF2G_01109 [Cordyceps javanica]
TQW12394.1	MCAAKSSASRATAVSSAVSCWLHQLPKVDARLREKDVYNVDVAGRHGVADHRDAQPAGRVDVGARRRHQDPHERRVCRSGRPWRWPDGVERRVAQPPLSSWPPAETPSVALTSAPAASDFLMTLLTCREEPPVAGADPERLGAVHGRGNVVLVEVSVERLEHAAVRAGEPARVRGASEEGCDDEQHFRGQGG	hypothetical protein IF2G_01125 [Cordyceps javanica]
TQW12407.1	MICDWRGVRDLGLVHLLDSGARGGGGGGARHFSCTPVKAGSGLRLSNCPLFTIVTGNRLEHFTCIIEHVIIIMQQSTPTLATRMAPMMCRVCRVGACTDTQRACAAGRQAEHLETGKRGGRAYISKEKRDMVGHGGNLSCC	hypothetical protein IF2G_01138 [Cordyceps javanica]
TQW12412.1	MAWHSRGTRPDGRRRNGVEIFEYPTASPGEDGGPRQRANNGNESPLFSKNLCIISSKRGNRSLKKNNFYGTTTECHRDGRVIGPEMECAITPHFTISNPCTLTIRVQI	hypothetical protein IF2G_01143 [Cordyceps javanica]
TQW12413.1	MGKEAGYPLLVRRLTPNFKLISSVKGPSYHVVPTTSPQYALGALIKSKNSSNVRGNSPGLERSSHPPLLACQPVQSTSRLGMSEEHSPPTQITLGRIPVRPTSFVMARLSLVLALVRTRELPRMDKPRNGNGGTGARVEGAKGA	hypothetical protein IF2G_01144 [Cordyceps javanica]
TQW12427.1	MSLTFLVRLRDRVVGYRSTHDQCNDYYLVQSTDTDSVYSLKSLHLYFHRLSVEWNTTSKSKHSTTITPLSEISVIPVSSFQH	hypothetical protein IF2G_01158 [Cordyceps javanica]
TQW12444.1	MSCLQGLDLSPCRLPVVSSVYRNEEAEELGRNWTDGASVALPGLFLDWSGRDLLRPSTISHWTYLLADTLLCHSFLLVKDTFGLLQGTSQPCPPSPPGWVGTVPLFRKVPVFVRNMRAGTWPGSSYLGPTKYLQTPFIHIHVRSTGTE	hypothetical protein IF2G_01175 [Cordyceps javanica]
TQW12445.1	MNSPSINWGGSPTIQTIPHEQPISAAAAENQAATVRGCQGQEKDRGTWTAEILNQSGRADGEAHLNWDKRASPAFNGSRSWNEEEPAEPRIRKSMEKELKGAGPDPILFLLRLGDQSCDSWNRASQAYLLWGGKVCPNHLRCIGGSLSMLEKDDPFEFYAT	hypothetical protein IF2G_01176 [Cordyceps javanica]

## Sheet: C.fuomsoroseaARSEF2679
SeqID	Amino Acid Sequence	Description
OAA33868.1	MELQLSQIRFITGLHQNQIEAEDIFRIWQMSSKVCPGSPGINASAPLHAARYILGSKFHFVLSLSEDGFPVHRIVSILDVWQMAFAPNAGRITHDDVTFAIKLHSVGLTSREVASILWTRGLQKPIVTRVLSRTVRVSAFEFSEDVAYKLSQVGEVAHIKLENGIYHIQMKTHSQAAEAVKWGHSFAQDQCSFEEDSGVCLFSTRDLSGKDLQKLLDSAGGSRGATQLHQCVEEPDVQEKMESPRK	hypothetical protein ISF_10056 [Cordyceps fumosorosea ARSEF 2679]
OAA34029.1	MRGQLAILRAAQRRLQQRLLATLSQNYALIVSMQELKRQLSQQKLAKDEEIRRLGLEISALRHLRQFTYIVRPLF	hypothetical protein ISF_10033 [Cordyceps fumosorosea ARSEF 2679]
OAA34067.1	MPQDMPQDMPQDMPQDMPQDMPQDMPQDMPQDMPQDMPQDMPQDMPQDMPQDMPQDMPQDMPQDMPQDYKRQDYKPATGACATEWQDVEPQIGSHRQKVTLKMFG	hypothetical protein ISF_10030 [Cordyceps fumosorosea ARSEF 2679]
OAA34131.1	MARQLPKIQAHFRTRHGWKNSRNAGRPDLKRKRSPADEEGGVNVADTPIELHWRENVPNRKLPTLARRRSDAEPMREDDQTTNDTSRLIRCWLVTSKLNSYQANAFSVMTEPSTRYRYRQTWKKFIAFVVREWLLPSRIRRQVKVALSLEIQREIQLLWEHQLWNTPDMTTGKWPNILDRRYSLDVQHIPTLEKDVNTAEYDMEPEGNTVDDSGYNSAEETDWESDTSATEYNSEADEDKWPCTVQPEKSSRNHEHRTRCGSTVLEDQRRSSS	hypothetical protein ISF_10027 [Cordyceps fumosorosea ARSEF 2679]
OAA34399.1	MEFVLIWLIVQLLNLALWLCFARLPVLRLLLDRTIQVRLKRRSPRNGKTALSHIHDKCTLLLENMHTLDKADISGFAPPRVLRALVGSILVAQNVLALSILSDTHALLRRSGQLACINLICLVLVACPDVMEIIARQTTPQTTWAHHLYGWIVWYEVLIHVLAYAMLSVNISKLQ	hypothetical protein ISF_10013 [Cordyceps fumosorosea ARSEF 2679]
OAA34642.1	MKTVVVLGQLAIVAGFCSALEAQNIIVRSTRTLETITLNTCLPASLPPGQSPGQSSGGTPEQSPGQSPEESPEESPEESPGQSSGGTPEQSPGQSPEESTEESPGQSSEGTPEQSPGQSPEQSPEQSPGQSSGGTPEESPGQSPEESPGQSSGQSPEQSSGGTPEPSPGQYPGGNPSGNIPTSSQPSEAQPTGPVGTEPTTVPTAASSRLLANSYWCFVVFGVVFLL	hypothetical protein ISF_10005 [Cordyceps fumosorosea ARSEF 2679]
OAA34886.1	MAGAAVDTPSGSTTPAPPTDLRPSVPILSFIDGEAAFRSAWANDAPGIMREVSALSQAVTNMHEEIMRLRQVANTTNSHIDTLQTRLSNTLMESNDKDETISHMAGQLEAYKVIAATGGSHHQRSAEHPKPDPFNGNNPNELPEFLQKLELKLHMNRDWWTDETERMGFVISCLSGDAHAQVSHNISHGIVKFTNVEAIIATLKTVYGDIDSAATAQKEIYDMKQGHKSLASFLPNWIAVAKLTEFEDKSLISHLKRALHPDIIWRLVVLKVTPATLREFIELVRQCDSECRQLNADYYKKKPSNNNKAPTSTAPAISRSQTPLATNEGDAMDLSAASWGPKDVASGRKPRTMDEREARRAYCTAHGLCNWCNSTDHTAHICPTAPWNSKEGKV	retrotransposon nucleocapsid protein [Cordyceps fumosorosea ARSEF 2679]
OAA35143.1	MYNHPPPSPLLNSYSTHDNLHDDDNDDDNDDDNDDDNDDDNDDDTDDDNDSTSSQLLPTITDKGKPKRKRADRESLDSTYAP	hypothetical protein ISF_09991 [Cordyceps fumosorosea ARSEF 2679]
OAA35199.1	MVPTTADILAGFLDLPGELRNYIYEFILLQKEPLNPFVYYTPQANLTTGLFRANRTIYRETTLFLYSRNVFDVTNAGPGQVSSFIGRIGNINAGYIRHIITTFPSFLDLNPGDVTFEDDSSKTLKMIQAACTGLSTLETSLDSTNSMELRLDNLDHHKLATEALELVNTHFRAIPSIQEIILNVFEDGPSDYLRSIMTSYGWTIKTTEYEEEEEDDRGYYDFDYDDYHYDYSSGDEYDIDNDSDFWRRAAD	hypothetical protein ISF_09989 [Cordyceps fumosorosea ARSEF 2679]
OAA36311.1	MATTSTSARVPAGMIFPYDEGTALPFIVRGPGMELSGYEGTILNSYKTLRVLGDDESRLYLKWCTGDAELYNTKNPDLYKLTNLSLNPDQQTKRLIAHHNALLVSTKFYHQNTYRSPWTVLQTTYINSSSTTCTPSGSVFSNLRAHQRVGAAGHPGHPPLMPPTTVACRALV	arylsulfatase [Cordyceps fumosorosea ARSEF 2679]
OAA38287.1	MSAGREYWPTILDKGNSAVSANRATTAYPGAPAGDGRCEPAAFEPQSTLSNVPLSDKKSAQASANTPTRTPLSIPVTPPSENIQSAFEHCFPFDPTIQVAAFAIQGNATISYQSVDPVIERRLYAVEASVANLKSAVRRALRNNRRSSSKKKMSCIVEDDDSSSSCTAGSDSCSNSSSYDDSSGHGDSRGYGDSSSYGDSSSYGDSSSYSSSYGDSSSYDGSSGYGDGGSDSDDDEYDDHGSSSNGENGGHSKNHETGRSPSPNGFDNGHADDRLNYAEENPPRLHKRQKLADAPICISAANGIA	hypothetical protein ISF_09896 [Cordyceps fumosorosea ARSEF 2679]
OAA38527.1	MDESSIDLKFHDGNGLDTIEEDTGSKRPPALTEASADDSDAQPLYVQRKEAGAGDHSHKADWTNRIHIKKGNVGDSDPADVKKDREDADGNVHADDHSVTLSACAVHMTIRDEDVHEVDSFVWDESKGNYKHLGSPRRITPWLHLKKQSRRERYRSRHNKILATVVWKGWRVVIARLGRDTWRGSHGRSLLTANSKGMKNLMEGKCAEFQIQRI	hypothetical protein ISF_09885 [Cordyceps fumosorosea ARSEF 2679]
OAA38531.1	MAKLQLWIGIGKRRGNDPRHWILILVAPDATESTWYHVTGGPTTSTEYKLVIQNKRFKSFGIAEHHFVGEIDEKDVRKLKSSAQGVPVQMCQEWAVAVLQDLERKGLLTAGTAQHWSTQVESSQSSSTGHHGIVNPAESSSSGIQWVWDAAQQAYRYWDEKSRRWVWQNETTQ	hypothetical protein ISF_09889 [Cordyceps fumosorosea ARSEF 2679]
OAA39767.1	MAAASRQFPVSDNVNQRNAPMQLMNSKYGDENMSKKKAKRGRGDGHQGGCDHHWKGQHEQPGHACLDEQKMWTAKYIRTQEKGQERAKKGPRKGQERAKKGPRKGQERAKKGPRKGQERAKKGPRKGQERAKKGPRKGQERAKKGPRKGQERAKKGPRKGQERAKKGPRKGQERAKKGPRKGQERAKKGPRKGQERAKKGPRKGQERAKKGPRKGQERAKKGPRKGQERAKKGPRKGQERAKKGPRKGQERAKKRAKKRAKKRAKKRRREKSERGHPSLTLIRIGGRRVIKDVL	hypothetical protein ISF_09846 [Cordyceps fumosorosea ARSEF 2679]
OAA39937.1	MAENELHPVFQDWMPAPNACFDIQILEPQEADTGPPCRKKLLNLVKGRCKRLKVETSELQDGVLAIRFARTSSSVALVPFEQKAECLCNAILNYRNTAEIAKITARGAMGISPRSVQFDDIFRKCLYKIACGRPARLLNNIDGAPTDQLPPWVNSFALSIITDIPVYKPSAAMMHKAQPRQAVEAAGRFLEWLINSREDDEDDDAANGSLVIQLQEADELLAGAIASMAISTRRLQGNVTQGNIRQWHRHIDEQSYLVLQAASRILLSNDDVLARFLALYRADDGPGLPGLLGGLGAALSIGSIGTASLPLSQFTFAHFAGLLTTLTWPTIAVINPVTLTAGLGIAMAALIGHLNGSDARKVAARLKRDLEFVCKALRVCREVDLLQKWIRTASGGNVL…	hypothetical protein ISF_09839 [Cordyceps fumosorosea ARSEF 2679]
OAA40554.1	MTIAAPCHCRRHICLARADNDSKDSPPHQVPDIDTRNSHRSGCGSISSNGGSQGSFSGRDGTCRLSGHSSSESGLSSGSCRRCSSSGGSVGGSVGGSVGGSESRSFFSHEGSKSSYSTPGTSDSNHSVIGVFSA	hypothetical protein ISF_09805 [Cordyceps fumosorosea ARSEF 2679]
OAA40558.1	MAGLDGAEPAPSTHHVKSAPITVREWRGNVVGGRKNTSTAWSVYKTWLRVHSTAAKPRFDAR	hypothetical protein ISF_09809 [Cordyceps fumosorosea ARSEF 2679]
OAA42291.1	MSSPPQPEVGPADDFMVEQGAEFAIYHDTANEPPHAADHEDSSESPNVLHELPVPPPPYEQVSEPLGDTEAMEIYDMAQQYQRITYLLRESLAGRSPTFTEAEINLARGYMCSTTRDNLAAVQVDGEYFFAQYNQALEFFRTAVNGAQAYWEHVLSDDEYRSHTTASPVIEFLLVTHVLFPRLQGLINFMYSLEGEQA	hypothetical protein ISF_09731 [Cordyceps fumosorosea ARSEF 2679]
OAA42295.1	MLLSQPYNTSDADIILGNGHFNGHFNGHFNGHFNGHSNGHFNGHRALLESNKQVEHAKPPIHTNLQHGQYTLSGAPGPKPQTETL	hypothetical protein ISF_09735 [Cordyceps fumosorosea ARSEF 2679]
OAA43063.1	MGNERDHYNDRHVEHGSDKVGGLLRKYDPFSNKPSRQCDPIHDQGDGHGRFHGHLHDHHCREEYPTRRKRAYPDRDLAESHRRSRNNHESHSKRHCGGIPYGQAIASAALAGAVEAVSARHDKDKALHVATAAAASAAADAAIGSKGDAKSARHVAESTITGLAMDRLLNGKRKK	hypothetical protein ISF_09689 [Cordyceps fumosorosea ARSEF 2679]
OAA43580.1	MSSRYLVERHRTDQGALLLMHRVVQKHILSRLEQEPKEFQQIFDLAVKLILAVFPKQSPVQTPQNDLWEERELVSPHVLNLCKIFEKNLAALPSAGIEFAEMLSDASSYFWERGLYTEAFQTSDSAEAICSRLGNNLSAQKANIYAIAAAIRVDHGISQRSNSWDKLNKALQMRQFHLHVVKPELITDEDITCWGNAWNDIGCGLIDLGFYDVALDFLFLAWEQKRASILCQQQYNHFPESPMNVSLALAGTGRYKESIALMSETTENTDRNFTRDCAVAQQVHISLASILVSAGRYSDAFSEVREVYERSIKLFGLSSRRTSDAAYLLATVEQKRGNMERAKSILEITLSRLNGWTIEAEARAKYRLGIILTHLREKDAAAALIETSQESLRTLWSQH…	Tetratricopeptide-like helical [Cordyceps fumosorosea ARSEF 2679]
OAA44441.1	MYFPSATFLLAVFMASSSVAWARTPTKTPSAAAASATAAATSSVEAMLIHPECYTSGPLLRVGDGGGGSEDAQIRHFCASNGDKALGVSQTHGLLESKPGDGRLRLRIHLDGVHRGDNTSSPWAGYYVGGAGDGDVQVEYCVAAFAAVIVSCTGRNNTGGSGVDARDLKGGSAVRKYYVNAWGA	hypothetical protein ISF_09635 [Cordyceps fumosorosea ARSEF 2679]
OAA44730.1	MLVRSLSGQHGPDPMLPRQTRQHRLGCGVQVEDVMLGVMYRVLKVVGELLIVHLEPVTLDPQPESFAKLFHCSRGNVCRGG	hypothetical protein ISF_09617 [Cordyceps fumosorosea ARSEF 2679]
OAA44738.1	MSVSRGTTRLLPIFIDDTRGCTSKDSGEEGRDAQKYCASDCGTVKEAGANRREAGFQCYVGQGATQQDDTENHFQNSHNDDANQAGSYASHEACEHANEEGREQDMIKKALGGLIPTKEHQF	hypothetical protein ISF_09625 [Cordyceps fumosorosea ARSEF 2679]
OAA46034.1	MEHKRDNGSNNAPNSTEHNDPINDSDPDGYRYKIGGLVDHESFRWFLLINV	hypothetical protein ISF_09568 [Cordyceps fumosorosea ARSEF 2679]
OAA47531.1	MEGARGRWASCLGLEASLARGQTLGISHFSEFRRTRPSAKSVATCQDYSAEETRQSRLHHCKGMETYIFVVYAWEVA	hypothetical protein ISF_09523 [Cordyceps fumosorosea ARSEF 2679]
OAA47956.1	MALDDDGNEAGAGAAAASGSGESETEDDEGAAASAAAAAGVAYPLHRRPVADDRLEIHGPGILVMWKRKGSAGGAAAAAAAAADDGLMTKEMERKGDF	hypothetical protein ISF_09488 [Cordyceps fumosorosea ARSEF 2679]
OAA53138.1	MASVASAPPRAFTPPGGKVRMTLDGIDPVQFLLVGVDPVVGMTLDDAVLTAALVQDRGIFRRDLLVASPTLVTFPAAPGPAEKAELADARG	hypothetical protein ISF_08979 [Cordyceps fumosorosea ARSEF 2679]
OAA53260.1	MPSLRDILNNADNDSQPRVASGSPSLPPNLPRSLHFANSFDLPTHHASSSASPSRGDPPKCVASCRPFAPPPRPPQRRDGTCSSASEPPRCSSSHPPLPAAASAIVPGKAVLGCGDRLTRPVTITGRVLWFRRGDLIHTCAQCFKTFTRAEHLRRHLPVHTAPSLACDVSGCGKLFHIKHQLPQDIFTGRNKKRTREV	Zinc finger, C2H2-type/integrase, DNA-binding protein [Cordyceps fumosorosea ARSEF 2679]
OAA53261.1	MYEVARNFVESHQNGKDTGRMVRDADFDMVYQGITTSFSSFDTGEQLQQLDWNSHHETISMQAANELDNWFEHSQRLQSLFEDIVDP	hypothetical protein ISF_08875 [Cordyceps fumosorosea ARSEF 2679]
OAA53262.1	MPPLEMALSCIQELRLSSSVRFLWTWDIDTIGQLLEITTKVYTGKASDAELIIVNSTLSRLLPICTGDGDTVPAQVVLEPYIRQCQINLDALLCSIPFNLKPDFNNALAFYHAVSFLPACYRC	hypothetical protein ISF_08876 [Cordyceps fumosorosea ARSEF 2679]
OAA53358.1	MDTPLNTGRLRQSKPRRRLPLCGGLALLLATATLYLVVVLRYSQATVRPLSWLLPPHEIVDSIDATPSDKHDRFALHPELHVSRPPRTLKLDWSITRQQHRPDGVLRDVYFINGQFPGPTIEARSGDELQITVTNNIFNDTDAGIAMHWHGLRMKGK	ferro-O2-oxidoreductase [Cordyceps fumosorosea ARSEF 2679]
OAA53375.1	MLLRLDARVAHRHDDRVTPAAVLPLHARRQQQRRHPPIPREQQLRPLPAKQAHLPTILVPHRRVERERAHPQHPRARVVPRVRVPPDQRPVAEPAARLQRVRQHVPVAARVAKHKRVLGGLREHRAGLDFGVRAKVAARGNGDVDHLGAEAVLRTPAVRQQHRGGRVAIRAQRERRGIRHVRVPVRAAVLAPEYLPGIRPRPQIPAYLYRYAALAVVRVPRAAREPLRCALTRHVRRAADVVHQIRLVRRAVHHRRVVRKCARHLLREDVRPGGARARLGAHDARVRRPVVQPAAVRELGDEEVVQPGVYGVRHDAGAPRGDARAVVAGAPRADRAQVEHAAVGAGPAGVARARAGAAEAVEAAVLVGGAAVGQLASRRRDGEEMWECPAGRLEQALHR…	hypothetical protein ISF_08856 [Cordyceps fumosorosea ARSEF 2679]
OAA53397.1	MKLSIATITLLAATALAHPTAPSSVDRRLQRNGPRFLDLFTRSGGDKSDTDPAPKNSTATATPTPKGNSTASTPTPTPTPTAKPSKDDKGEGDKKGSGGGGIANSLIDTAGGLLKGIVNIFGKRVGEGLVVAPIAFGEMNRQPLVVPERSGLIDHPLRWPFVRAVPVDDGVGRGH	hypothetical protein ISF_08750 [Cordyceps fumosorosea ARSEF 2679]
OAA53409.1	MLVSYGLESTPQSSSIIFRRQLCHQPTLVPALRVLRQLPVHHIRKLLRLVQRHLRAPHKQLRVHRVIPQLRDLANLPVPVHAKRAAAPPQLLLQPRRVQQHLGLLPLLLPLATEEAKRHAERRVQPAERHRLALRRRVHGQRAALHRRLRPAKVPQRRDGRQARGVEQVAVVHEHVQVHAHRPALLPGDQAQRLGVERAGAPDGLLEEPREEHLGLGGAVHLEGGRDHGAQLRGDGEDAVKRPVGERDRDFCGDFGQDSDGELVRKLGGLVGGYVRKHTLSCRIALQQCHTRRRM	hypothetical protein ISF_08762 [Cordyceps fumosorosea ARSEF 2679]
OAA53542.1	MRCESTAVFRRFPITFHDRRLLRVPKERPVRADTKSTRPLSLASYHSHTSPSTWPGPSRLSLPSCPAPPLRAFEAEEAGDGDAASAAKRDAAATYSASMACRREEPY	hypothetical protein ISF_08703 [Cordyceps fumosorosea ARSEF 2679]
OAA53687.1	MRSAIPPYYTRLSIVVILIIINIIGILFTTLVAYFAWLIIVAFCYRTPSTTIWEEQHQDAQCPGPRSPSTASAQDTDSNVQPKPQPPPTQPPTQQRRPWEQCRRALVKLKRALARLKERVQNRVTNMWLICIISRLPN	hypothetical protein ISF_08626 [Cordyceps fumosorosea ARSEF 2679]
OAA53721.1	MAANKEIWEAKNKKVAQSSDAAPSAAPPSGSSTEEASTKGTSDGRQTTSSSRQPPAASDDQREEASDQQKDSSRPVPS	hypothetical protein ISF_08660 [Cordyceps fumosorosea ARSEF 2679]
OAA54670.1	MPTGEVRELPESLGSNYPDAYQHHAHCGTRPPVRRRAGSSDAAILGSLNKRRPLTLLERLGTVSKEISPITLIVDAGSSGERWSEHDRATRVWKKATTNSTIAAIASHAHW	hypothetical protein ISF_08271 [Cordyceps fumosorosea ARSEF 2679]
OAA54691.1	MSTSIKHLVNAQKPRELPLRIAIDGPTGSTAVLSTTATATLDLGAAARFEDTTSPVRLPIDVPLWHRMGYVGSVTPKSQFAAFFREASQPVNPCLLRELLAVALSERQELQRRGEEPTWPRDDSGVWYNGSPPPEFWETDPEDSPTALPLLDQSKSESNSPPELPTPTVFKQTWALPRKRTYDQLVPDDDYGGRDRVAEPERRIVDAHGARKRRRVGAAAGC	hypothetical protein ISF_08292 [Cordyceps fumosorosea ARSEF 2679]
OAA54929.1	MKLSAAVSPDAHTTKAKETPTKPPGEKSSKKPQPQTQAVPATTQILMHYLSVSGVRLYLAGAFITVCYQCLNAAHSWWLTQWTSDDSSNSAPSTAALWNVSLYLLITIFNVVSLASQALVFATVGMAASRAIYGSLIRSVLTATVSWIDSTPFGRLYQIIDTDMHLIDDLIAPAFNGILGTVINLGNIIAVRYDSPRTSLLTMLS	ABC transporter, transmembrane domain, type 1 [Cordyceps fumosorosea ARSEF 2679]
OAA55181.1	MASETLLCLDPSILALTICVLVSCRTSSESSYSLLNIDQKLLKQTLGDQCYESTEDFRPDAYRIGLSESKRELRDAKAMGHESAGYLS	hypothetical protein ISF_08102 [Cordyceps fumosorosea ARSEF 2679]
OAA55366.1	MLAFTLALLCAGVAALPGSADKPCSGEEIANCCDSGKGKLKNKCSPGTCQTPALDVRGANQRRV	hypothetical protein ISF_07877 [Cordyceps fumosorosea ARSEF 2679]
OAA55383.1	MGQQLALGALSDADATEGVYATPPMQLDEARSVARRAPKPPLQASRPEREEAKGNDLHHEPGDDDCLPSVPLVDVLATRHDRARHLRPETGDVDHNEEFRGKLAHQHEIFHIEDPRDATRGHEDAGSKKGRRGQDQQVLDDEGQCSSHVIV	hypothetical protein ISF_07894 [Cordyceps fumosorosea ARSEF 2679]
OAA55979.1	MSFALGQKRCVGSLENAEVRSARRHNPAPDGKVLNHIINSPTLNLGAPQSSDMHLALGVSLQEADADADQPDYTLCPADLDLETQNMQSYDMVWGPLGSAGSSDQQAEPDLFDFGLCPADLDLETQNMQSYDMAWGSGG	hypothetical protein ISF_07577 [Cordyceps fumosorosea ARSEF 2679]
OAA55982.1	MDGIAGGKENISNCPYQLDKLIADQGLRQVFGSKNHRMSNEPSDPEYDATIDMLGWYIPRSKDMPIVID	hypothetical protein ISF_07580 [Cordyceps fumosorosea ARSEF 2679]
OAA56073.1	MRRCAVRRQRAIFAPRTLELAAWPCLFIALWCWKCTMLVVFQNTIIYNPFLPPDARRLEIAEAAMPLCDTSAMHHLYRLDYPRYRQSSAKFETAIAAQATPWLL	hypothetical protein ISF_07671 [Cordyceps fumosorosea ARSEF 2679]
OAA56114.1	MFFYLTVIARLQAPFSELGGDGGEDKVGVSVGRDTDRRAFKSVELDDVTISKRIHRKGVAVVLAVDPFCKSGLVSWLTSAAHAAVPSHALAKGPKHARQRYQSM	hypothetical protein ISF_07712 [Cordyceps fumosorosea ARSEF 2679]
OAA56417.1	MVVSAGAKKVNFVGLGSGPEVQSVDSATDGHDSDVPVALSNPIRNMIQRGDQSPSVHVLETSQRVHRLSVLVLARQWHRDQPSLGGPEMTLQDCPAIDGCGTFRGLRMTVTHVY	hypothetical protein ISF_07485 [Cordyceps fumosorosea ARSEF 2679]
OAA56490.1	MQFSIVALFVGTAAAIPATLSAKLAARDGICSALLYSIPMCCSADVLNCNPPSSANGLEGFRKAGGAAGALPRCCTITTGSFLCKDV	Hydrophobin 2 [Cordyceps fumosorosea ARSEF 2679]
OAA56791.1	MGDIRSYFRTTCYRTRTLSTNFYTLVFVYSLRDFMSTRPDVRLGEDARGHGEDARQDDSTKLVASKVREDEPAPDADGSHDDDHGDRVVLRAAESMREPTAISMCRIWHPTVAHCRKDVQALAGPPEVTSPCLATLSEQTPRPPPEVPGRRTSLREERAALRRGCRAGTEWEADRRGSNEQRNEERIHTI	hypothetical protein ISF_07307 [Cordyceps fumosorosea ARSEF 2679]
OAA56803.1	MQDAFYGDGVAGVAAVLGAFDADVSAAGAECGMPAVKGQRALRVHGAVGGCGGVGAVGDEAVEVGRGRGGGERGSGEDSEELQMGC	hypothetical protein ISF_07319 [Cordyceps fumosorosea ARSEF 2679]
OAA57299.1	MLRWKGKEHTCDTTTAPQIAHNACEIHNERGQRPRPLIGSVFAAQETLRNRRYLGQDLARLLHRHRHRRPGCAGVLLLVPVLPSQSAAAASETQ	hypothetical protein ISF_07220 [Cordyceps fumosorosea ARSEF 2679]
OAA57722.1	MPFRQPSIRFRVRIRMLMLMLMLIPPLAVLFWGPTRNRAQPSNVSPKNGDRVPEPLCLVFCWV	hypothetical protein ISF_06963 [Cordyceps fumosorosea ARSEF 2679]
OAA57774.1	MRMVPSCQKRAGSNTVNSREQKDGHQNQFSIDMYNFEQNALNTSIKNEYAQPRRPLESKPISIPGSMPQPQNAVKPESNEENYVSGCGTKSIPIPKRKKKGTDQQR	hypothetical protein ISF_07015 [Cordyceps fumosorosea ARSEF 2679]
OAA57789.1	MLPPPPPPPPQPPQPPQPPACLRAARRPRADVRLAAIPGQHLALHHAPRGLIDAGGDCHVHADAGADGPAGAVVPAVRRDGRGGGARVPAGRGVADLVPAAAAGDRDDWRVRAIRAVDGRAGGGRGGALGERRRAERVQLAGLEPEPARAGRGDAGVVAAAEHL	hypothetical protein ISF_07030 [Cordyceps fumosorosea ARSEF 2679]
OAA58156.1	MAVEACGRSKEQRGEEPRAGVITTTDGSPLERPAQRLRDDDDDNDDDDDDEEATDTSLATPTESSALLGNSSNANGGGKYDPESGEPKKARDWDQLPAPGEASWGREVKMVLKSSPPLIITFFLQFSINATSVFAVGRLGLLPP	hypothetical protein ISF_06695 [Cordyceps fumosorosea ARSEF 2679]
OAA58317.1	MDITAEPPAEYQEHRRLLELRRHRARRAAARLEKVPLGAGPRPAKIPQAVYRVGAPASARARRRGDAQAAAEPQEAEQARQPARVLPPPPPPPPPPPPPPPAPAPGEDGQGARLLEGKQLGSKPPSLPAASGSGLYGGPLAEILPRILTTSLITGSGSRGAVSRARRRCCGGWRHGRPRWGQDDGFQKRPGAAAAAAAAAAGER	hypothetical protein ISF_06856 [Cordyceps fumosorosea ARSEF 2679]
OAA58318.1	MGGFTVSLLSLVSTVAKPHHQGVLVFLTADIEDVDGLDSGDTSITVNEQLRIWLHDRYSTHRTAISHEQNKNFFNKDETWILASAPDTQALF	hypothetical protein ISF_06857 [Cordyceps fumosorosea ARSEF 2679]
OAA58721.1	MIQAHHHLNARRLRLRLPASRRVRLLLRGQNLEAPPRRLALAFAAVHPRHHAAHQPVVAEPPRPVHAWHRAQEVIVRHVRQRRLLQRRLPFRGFHLGPGQLHDALLLRTLASLPGRGRDADRLKRAVRVHPARRRRLPFTDRGCGGRGTLGLVSQRAGAAPSDAPKVEHRGEDALAGLQAPHGARDDAGAVAEPLDVREQRLVGAHGEEEVAVHGVGEEAGRHGGLRGDEHLGEDGAAKGAPAPERLVKRRLVDEDVAAVLRGGAAGDGALHGGLQ	hypothetical protein ISF_06504 [Cordyceps fumosorosea ARSEF 2679]
OAA59328.1	MRTYAAQPIFISSKTVGTSCVSYKPSPLLWWLLSGQPKYNNVLAVALAAQILLAHVLGLLGPPLLDLNLDARLRHQRHQLLRMRPVRDQRPDRREVAEDDVEVRQGDARVRLVDEHQRAVLAREGGREVERGRRVGGDDGGVDAGVAAAHDVGDAAGGGGVVDRVWNLDGEASVAARLIDFTYATMYFD	hypothetical protein ISF_06263 [Cordyceps fumosorosea ARSEF 2679]
OAA59331.1	MEETAPLVVLLAAQRIPASDADSQVAVAHLAVLGRDLLPVRHVGNPEVMDQDLLNLRYIMGALIGVRDLTSQLRWQGTSVVKGLRA	hypothetical protein ISF_06266 [Cordyceps fumosorosea ARSEF 2679]
OAA59948.1	MKSTIFAASVLLAGLALASPLPKPDTPKPPANQCPLGQHSEPNHWSPGGPPICIPDGAIQ	hypothetical protein ISF_05959 [Cordyceps fumosorosea ARSEF 2679]
OAA60162.1	MQTVNTILLSLIAASVGTGLPQSGGTAIGQATQCKYMVSWQEEKPGYKWIWVCKEDCVTWQFSDKSHPECLRQVPIDSTDERYVAAQRHMDCSDRLTRTLFSV	hypothetical protein ISF_06172 [Cordyceps fumosorosea ARSEF 2679]
OAA60682.1	MLASPQPQPKLYIRKRTAVLPEIWSFRERLHGPPQAHRVHHAMLVRHTLCQGRHRRPAKVQRHLLRTERKPAVMLDRKAVLGRHVLEVPPDDGRAVERRVHHRLDVATQQHLPVDQHRDARVRSDDGFGLLKVRVGEVGHAEDVG	hypothetical protein ISF_05721 [Cordyceps fumosorosea ARSEF 2679]
OAA61306.1	MDTRTNVVARLSNAESATALTPPVTAKEEDQDNATEPTPAPKDSQKHGDQKLPPTTEDKGKGKATEPKQPPHELMAD	hypothetical protein ISF_05385 [Cordyceps fumosorosea ARSEF 2679]
OAA61538.1	MTSSPPLNPSTSGSLFLASFPILGAAHVARARSSRQALVLLRPSLQLRPSPGQTRSAQVEPQNHRQPGLVWGLRSHTNLSVRQSESPVYYTTGTGTATATATATATATAIATATATAINHCSQYLAAGSEIKRQGSSRLPITSPNTRPAPR	hypothetical protein ISF_05617 [Cordyceps fumosorosea ARSEF 2679]
OAA62132.1	MVSQHHARHEIHRGQRDRRYHELVHVVLVKARPKRLLEGAYHGAADRATELQHKKDEPDNDGHLIVRHRCLRHGEHVGGHEPAAQAHQDLRSHDLERRWAGHPILSHPAQAYDADACPRNGQELVPAGVRRDEPGEQVEDDEAQGVDGLLL	hypothetical protein ISF_05141 [Cordyceps fumosorosea ARSEF 2679]
OAA62201.1	MARGFDPDSAFDVAKLQAQRALSWLQGPGLRAATAVTLAAVHQEAPQLAACAGGYLDRHSAMG	hypothetical protein ISF_05210 [Cordyceps fumosorosea ARSEF 2679]
OAA62299.1	MGQLQPDQLQRMVLLLIHHHNVAQVPRACFAARRQRVGTHLPPCLRGKAATTIPTPRKTFPALCRPSTSSTRRSTAPTSAARPGMRTRASSSTRKSTSTSPPSCPSRFSSGFSQCFCGHAIESTAIKADESRCNADCPADPGK	hypothetical protein ISF_05308 [Cordyceps fumosorosea ARSEF 2679]
OAA62335.1	MSLPASPRTGLDANSRDQCHVFSAATINQPQFFRPFLPLRPAPVIEPRPDAVPAHPQRQPQHRRRHARVARQDGGPVLEDTGIRQYGPQRRPTEQLPAGGVDQARHRHVERPRDVAAREAVRASGVQDLILAAATEDQISELLEPHHPRRVGDPVGGGSGVLGKGRRGAESSSGVAVRDVLPEAIEDPHVAEAKVRERPGDPGRAADAGLNRVVHDEGVVGADAEPVHGRGKVSAGRQHDRVARSGVSDLVQVKEATGVMARWMAQELASQDWSVSGCRHLHRVGEVTTRKRRCISVSPGCD	hypothetical protein ISF_05344 [Cordyceps fumosorosea ARSEF 2679]
OAA62370.1	MKQMSAVDKEWGANPSSAEDNHDNQEEQSAEEEKSDEGQEEQSTEEERDPNDQEEHAAQVRG	hypothetical protein ISF_05379 [Cordyceps fumosorosea ARSEF 2679]
OAA63086.1	MTRPKAIDRHAAQIHNRHRLAAATLVSAKGLPVAVDLVACAEPLPLLPGGGARTSAAARRKDSRPCRYVRSLPSSTSIAMNGPPPAPRASAPFRDRAVPRRARVEQHALESVRGGGVDGHDGVHGDVAVEQPRVRVQIAVHARAVAQRLQQLRDGLEVDDRDHARSRGDQVVEWVLLDEGNLLFG	hypothetical protein ISF_04962 [Cordyceps fumosorosea ARSEF 2679]
OAA63130.1	MKPIIAFAQHGGYFISGPGYRRIHNLPDWFKETMSKALEVYCVAFGPGDAAVVTYLDAQTGCVQLRIKNIASMRGLAEYLLDRNPHTEYKRHLRHLQVSFSGRGGSYWASDGQTSIYRELPEQLELDLRMLQTERGAWRDSTRCVVLGAGGNYVLLTGRGASSCQLGSYPGVFHTMNAVDSAPTGIGSIWGIHLDSFRGSSVVQCSDGSLHGFDLSPEARRDIAQINRQVHAAQAAYCMAQEQLRQDLFQAQVMQQAMFVQEEAALKHMFRKQLENQQWCAEMSARAGGVKWVEGDGYGRPK	hypothetical protein ISF_05006 [Cordyceps fumosorosea ARSEF 2679]
OAA63132.1	MESNVSGAAVRGRSAPKDRLLSASVWASTSLMSRELVTWDRRDGVYGERLEEERLLTPPAGDQRSEPPDRSGWVEREREREGGVSLWLFFLCESLVMVVVW	hypothetical protein ISF_05008 [Cordyceps fumosorosea ARSEF 2679]
OAA63194.1	MFRLREQNYTLVIHLPRPARKVLLQDGQKRSPHLVGPVMVRVPDIRQQRGRSLTANRQIFLPKAEVSIYTANLNFSKSAPGEDAGHRGEQQALVDESRVAGGHALLRDGSADPVDEVDDIVVRGALDYNDARVWRARVDNPGHLCEGRLEVVYVGQNPEGDGGVELAVLERELFGCALADVDVGTATVLDEQVVAFVVRLDGVCLAALSGNGHGQIRPQEVLPPYIRLS	hypothetical protein ISF_05070 [Cordyceps fumosorosea ARSEF 2679]
OAA63781.1	MGLRNIAPRSAPDSMSADYSISTSLISLVQTLAAAMDLEHVAIPVVLSRERLAAAPRVLAPVNRAEEAALDAALFVAVPDVTVPERLGVEALAAAAVRARVLRGAVPLIVPT	hypothetical protein ISF_04490 [Cordyceps fumosorosea ARSEF 2679]
OAA63792.1	MGQTADQPELHHVSTAAAHDDDRPSLDKHDAADIREVQGNAHFYETVTAAPLNPWSRTSFQLYLILLVAALNATASGFDGSIFSSINAMPQYQKYFHHTELGSATGMQVVSIFQQFMAC	hexose transport-related protein [Cordyceps fumosorosea ARSEF 2679]
OAA63863.1	MQLLQGSIATPATTNIKPRSRPADPDIGIDDLSKATGRVDIGVGTRVDDDAFRRGSDDEALDDVSAVEVADSGARAVKLEGRSTLVR	hypothetical protein ISF_04572 [Cordyceps fumosorosea ARSEF 2679]
OAA63908.1	MGCRDLGIYQDPRYVPQGEPQWDRRGLKPVPPRHNEHHPVPRPTPNPAPVPAPVPAPVQAVPEMPVPGPRPHPHPQAAPKTAKAHRPHQLNLDAWKRGYCGKRPVVVLPPCGYGNWSRP	hypothetical protein ISF_04617 [Cordyceps fumosorosea ARSEF 2679]
OAA63982.1	MDDKSSKDEDDESSIFKEMRRNGAKASMVFTHSHRVPNIVTKLLTTLIFLNKLVGWRVLVPTLSLAFFFMGIDAIIALQHHKTEEALNKQTSENSTVIANALLKIRQIKLSAAEDEWMIKAREIRSKELRLRRKHSLLICASKLVSGVVSAVLAGVPLYLCTLRASLASLPFEVSDWVEGWNGLQRLQGYFAAPEAERTTETASEDILLDKAAMAWNKDARKDGKLELKASLQFPRGQLSVVTGKTGSGQSLLLSSIAGEAALLSGEFRAPVPHAA	ABC bile acid transporter [Cordyceps fumosorosea ARSEF 2679]
OAA63983.1	MAGGKGLLRIACSGPNEDLATHQAMQCVQKAAMTVTIEGGRAEETIQLENKVSDVVAEDQAPGAIAKDVAPSKGLPQPQAEPGCKSRAAPKLASQNPYAPYYRAIGGVKVVLFVLVTLAVSTALEYTRSDGCNTG	hypothetical protein ISF_04692 [Cordyceps fumosorosea ARSEF 2679]
OAA64006.1	MWLEIAPRPPPEALNKYRRAYSQRNQEIEKGGEANTVNVFSHSIAECPDVRVSSFMLDHAFEFAVEQNKLSMVEVMLTTGKDLLRDINLIRFVKTQSMFKLLLAHGAEVCSNPAPLIHSVRNRDFEFTSLLLSSGYRPDMQLYSATETAVYWAARDDDADMLKKLAEYDGFEAAVTTWLGHEIDDECMCRYCLHELPITPVSAAAVLSRTTDCLEFLLDHNAWKHRQANGFEPYENDGSDHNVPCNMASNNLASDNNDSDNNDSDNNDSDNDDSDSND	AvaB protein [Cordyceps fumosorosea ARSEF 2679]
OAA64053.1	MTRGFDAIAITRASWHYAVLWVGSSRLYGEFTAGSRPSARRNPHDPRGGLKCTQRPISRHQLPFSDTNQARQKQQQQQQQQQQQQQQQQQQQQQQQQQQQQQQQQQQQQQQQQQQQQQQQQQQQQQQQQQQQQQQQQQQQQQQQQQQQQRSQA	hypothetical protein ISF_04762 [Cordyceps fumosorosea ARSEF 2679]
OAA64827.1	MATRGRRHHRGSAQPDQHGDTYFTQHSNLFAARLRHRRFQRDIVPCGRRGQLHQARQAAAADPIYRNDDDGQTSQSHRDGGQNSIVEQTEPNGDQ	hypothetical protein ISF_04237 [Cordyceps fumosorosea ARSEF 2679]
OAA66075.1	MSPAPVNPSSSRGADLQPPEIFDNDPKPSTDPAPTAIIPDQPVKRGRRSNPKVKTGCANCK	hypothetical protein ISF_03913 [Cordyceps fumosorosea ARSEF 2679]
OAA66110.1	MDKPTSSVGAGDTFIAGMLFGLTTAGGDGDDAAWDAHRCVRFAVDLATLKVQREGFAGLGVDIESCTQEAPWPVTTM	Carbohydrate/purine kinase [Cordyceps fumosorosea ARSEF 2679]
OAA66183.1	MYSQAAVLVRQETEALRISSEQLQVLGQLVTELERLEALHHENADGPLPGPEAQTQDQIPAGSPDLPDGVAIPPGWTLMPLQRLDNQHRIQPTSTQRSSRASSAGPATSSLGEERTPHTPTSHPAPTSQPTQRSNVPVLERIPGTNNFRLAGSNNGGAAPRPEPTAVPGDAPAVVSAAGSTRSSEGSDSRGSAALEDEDEGPSEDEAEFGESSKAAGKAVTMEDVSEEE	RING finger protein [Cordyceps fumosorosea ARSEF 2679]
OAA67653.1	MLCSNRAEGFVRSNWLARVKKKKEAHRLTTSLERAFISALANSDVMLRRRHPGAAARLGRPHRARRAASAAPLRPRARHRASRAPAVFMAVPDHRRHLLRPHPVQRPDADARDRAAVADPLRHRPAAVRLHRAAPGRRAALVWRAGGQGPRVAARQHGGVAWWHDRGRGQGGRAG	hypothetical protein ISF_03829 [Cordyceps fumosorosea ARSEF 2679]
OAA68867.1	MTDPQPLPELVLKRIDCFKRFARPGAADCDHPEPDPRAAPRSARGHHLRGPAAGLAVRHDHPPHRDLFEPRRRGPPHELGAPHRLWHRSRLLANVVGGLQVRRRGGRRARAAGQAHGEPWRGG	hypothetical protein ISF_03242 [Cordyceps fumosorosea ARSEF 2679]
OAA68884.1	MVLDLMTAGLALLIVSFAVYLRDKVSVGLTGVALVQLISMSQALNMLIYFWTSVEISIGAVARIKNFTEEAGGENKPDETTQPPDTRPSAGKIEVRNLTASYDDLESAKALDSIEVTINPGEKVGICGRTGRQVYRLNLKDT	hypothetical protein ISF_03259 [Cordyceps fumosorosea ARSEF 2679]
OAA68886.1	MHPRRCLHKKLTLCSGSVLWLWLWLWLWLWLWLWLWLWLWLWLWLWLWLWLWLWLWLWLWLWLWLWLWLWLWLWLWLWLWLWLWLWLWLWLWLWLWLWLWLWLWLWLWLWLWLWLWLWLWLWLWLWLWLWLWLWLWLWLWLWLWLWLWLWLWLWLWLWLWLWLWLWLWLWLWLWLWLWLWLWLWLWLWLWLWLWLWL	hypothetical protein ISF_03261 [Cordyceps fumosorosea ARSEF 2679]
OAA68915.1	MQVSRANIKQASHQRQHQKRSTPPSIRRHAERYWRDNRRDGRQHRLDLLNSHELLHHGQRAVAALIVSRVCEAAAAADGGAAQVLGGQRCQQRGGAPGPATATTDASLWRLWMRSSGLRSEWVARDMPGRGFAGNQKLS	hypothetical protein ISF_03290 [Cordyceps fumosorosea ARSEF 2679]
OAA69469.1	MHDRLRMQRLNPSQSRDIYLTFSKYIHSYDEICLFLSVAPESHAGLFYLALGLFHKEKDVRLKTADLLGRIAEHEAGQHWWKSLSRFEKLAFDRIRRDADAEMRAQLEKEGLSPVFERNVFSY	Spindle pole body interacting protein [Cordyceps fumosorosea ARSEF 2679]
OAA69653.1	MAIATIKVCTSPFEYALTTSSRYWLGTCPDKSAAPLLRISAGSKSGSVVRISSTSLLAKAVWPTATNS	hypothetical protein ISF_02923 [Cordyceps fumosorosea ARSEF 2679]
OAA69654.1	MSTTAYTATIGCCHPMPMPNPTSTWKPIQTADGMDGLSSVSKPPPIDHGQRPLARLDGTNALDGLEPYQQVVDEDEETSTQTKLVECTGLDGSDAKHARRHCGVVLRPALHGNKGQDEDAEQDEQRNHSAVKDFAQLYDGPDGLL	hypothetical protein ISF_02924 [Cordyceps fumosorosea ARSEF 2679]
OAA70227.1	MTGDPIKITNKIKPWKSMRTLEEDPNPDISGLNALERSQPCGGSGSSVSKPMDRRTGQSSITAAKLESGTAQT	hypothetical protein ISF_02201 [Cordyceps fumosorosea ARSEF 2679]
OAA70275.1	MLDRTTTFAKEEELGAIQSPDIWGIWIALITLLCMTDHTFIGGLLLVKRELEVEPSGARPESAQAA	hypothetical protein ISF_02249 [Cordyceps fumosorosea ARSEF 2679]
OAA70296.1	MRFSILFLASLVGMAAAQCASTGGVCRDTGCRMHGGRCVSGPGLCYCGYGHAFDEEQE	hypothetical protein ISF_02270 [Cordyceps fumosorosea ARSEF 2679]
OAA70304.1	MSETATASSDTRQVITDRADNADNEADKKAEPDYEEIICILNAEIRILDLAIQKIEKDDPRVDALTRQRDELINERRMVRLSEISRPGLAPKDEMFMF	hypothetical protein ISF_02278 [Cordyceps fumosorosea ARSEF 2679]
OAA70348.1	MRFETRQGRVVEILRKAATFTVVTDGQSLNTFVVIDSAVVFESIVVVVYAWLRPGRRGTASTFPGAVIGGRPRTAAAVADDEYGGRS	hypothetical protein ISF_02322 [Cordyceps fumosorosea ARSEF 2679]
OAA70349.1	MAVVLQRVALKVLVDKPAGANGGEKVEEQPRLDNPHNGERCERIDRPFLRLLLFKFAWSACIFLALFFRHFLNVGYFPPLRLSMKQLQNRLVQNRRRPQPVPDDAPTRLGEKQHQRHKHDTCQPRQERKYAVPVRVPADHAAQDRSDRQPEHSPDLRPPHVGAALRERDHVGDHCAGQRRRGTAADPLQAAQREQRAVAAAPSRQPGAGGDVHGQERQVHGSSPETIGEGGDEGWHGALRDDEDGDGEVDMGAADGVGGGDLGRGGEVDLRGQRREKGDEGRRDDYGLLFAVAEDGVRLVGRVVCRQGGNGKVVSLAPHVADYSGVAARFTVVCFLV	hypothetical protein ISF_02323 [Cordyceps fumosorosea ARSEF 2679]
OAA70354.1	MRAKAAAVVSVSAAVAAAAATASAGDLVPRHVVLAPLALARHIGSRRRRRPIREAHVSGVVATSPAVPPPAAAAPAPIVAAAPAPAVAVATAPAPTVAAAPAPTVAAAPAHMVASAPAPVVAGAPGPVVVSYVAAAPTPCTAAVPAVAVVVVDVRVAVAVTAASRARARAAAAGLHAHPAKLAPKALDILPQLFALQGSFTPLVDLVLDDLLLFLKDLLRVLGQGYPIVVALMVPAHILELFDHFEDGDRVDSND	hypothetical protein ISF_02328 [Cordyceps fumosorosea ARSEF 2679]
OAA70618.1	MFFSSSPRPRLNIIFKHSTLSTHFRHIYSNAKQRDIKKAKGAAARTGLALHRAQKAETSSTSLSTSKTRRSTTSTRCSGRRKTACSRWQSALWARARRRCHPAASRRLYFQSHLCSRLTGKSTPKGEVPAHEKKDIEGFLTPLNVAAAAGPPRRRGPAAAASWEDGAQRTRGVR	hypothetical protein ISF_02592 [Cordyceps fumosorosea ARSEF 2679]
OAA71168.1	MPTTDRAQQRRNFEEFEDSHDEKVMENRARLMQRQAIIGSTLTNGRVDE	hypothetical protein ISF_01719 [Cordyceps fumosorosea ARSEF 2679]
OAA71248.1	MSLGVVVDGTAAGAVDAFEIAICIATGIAVDTELDGAVDAVDAVDAVDAVDSAADSAVGGAVAADAADGCY	hypothetical protein ISF_01799 [Cordyceps fumosorosea ARSEF 2679]
OAA71410.1	MSGLMSLANGMVDTVKGMLDNYTLVIDGAHSTGLMCLMGPHGSGYTRPLGPENEYLIQVQANSKGLVPAETQQSSRLFAAQIPTSRPDKALPQPRIATRGLGLYARSRRAEATNSLLIESASETHSCHPVDDGRWAVNIAQ	hypothetical protein ISF_01961 [Cordyceps fumosorosea ARSEF 2679]
OAA71554.1	MAAVSTATTLGARLPDPSSTADQDQVGMLHQPLLIGTGVASTLVITLIAAAGRRGGAHAGRRSDKQEEHGSDESRHRDAK	hypothetical protein ISF_02105 [Cordyceps fumosorosea ARSEF 2679]
OAA71581.1	MLREPAAGRNAKAASAPGGNTNPCRPTLRGFRIPEDDAGFCAACHYESNVSLQYLRQWTKSRLPGTILGMHHQALVHRGTLGLAGCREQNTVNALYGSQDDSLNMLVVIGAVGIPGRLMPALLGELRYTERQEQENDVCRRMPCAY	hypothetical protein ISF_02132 [Cordyceps fumosorosea ARSEF 2679]
OAA72193.1	MERESPSRRKQKRKKKKKKKKKKKKKKKKKKKKKKKKKKKKKKKKKKKKKKKKKKKKKKKKKKKKKKKKKKKKKKKKKKKKKKKKKKKKKKQRTPHKRAGIIEGHEGR	Histone H5 [Cordyceps fumosorosea ARSEF 2679]
OAA72195.1	MSRSREAHSWLRMVPRHDYPDTAPGDRHHQLPKADSRPHSSPSYLQVCTVLEHPSSAMRHHADPRTCLCAVSAASQLEDPIAS	hypothetical protein ISF_01268 [Cordyceps fumosorosea ARSEF 2679]
OAA72206.1	MDDMEEMDDMEEMDDMEEMDDMEEMDDMEEMDDMEEMDDMEEMDDMEEMDDMEEMDDMEEMDDMEEMDDMEEMDDMEEMDDMEEMDDMEEMDDMEEMDDMEEMDDMEEMDDMEEMDDMEEMDDMEEMDDMEEMDDMEEMDDMEEMDDMEEMDDMEEMDDMEEMDDMEEMDDMEEMDDMEEMDDMEEMDEMDEMDEMDEMDEMEEAEESEDRTRGKLMSGQERALSPLCREAHGPLYPRLRWLGWLRRLRRLRWRRRWSRHKVDRRFYSSIKLFKSTWVEELTKVVILHAIKVRDVIKP	hypothetical protein ISF_01279 [Cordyceps fumosorosea ARSEF 2679]
OAA72341.1	MPFISALNHDEFRCDESLDALQAATATATAAPDPACRLGHAQAHPPRMSDRENSGGRPPRVRRHGQWLQHRRHLLDARSGGKIPTRATRELRPAQR	hypothetical protein ISF_01414 [Cordyceps fumosorosea ARSEF 2679]
OAA72374.1	MCLSTDDMYTTDTFVVGVDGHLPSDVQALYPSSTGTSTPVGGDSSSNKVPVIVGSVIDCLAAIDLIAALILFRHRLFRKKAADSAPGSGDGDGGGPGLAELDTEESHKLPRQEMVDSSPGDIEDLERAIGSSRRAATLTARTDPSLGKWLTKVAYQLELLYGHTGNIACLREEYSSV	hypothetical protein ISF_01447 [Cordyceps fumosorosea ARSEF 2679]
OAA72590.1	MLRFRVAAVPRLNVRRRAEVEARADDPEEEEGADHGSDHDARDGTAGERCPSASMVRGAGDGDGDGGGCGGGLSAGERNGPRRQRQGQVRGHW	hypothetical protein ISF_01663 [Cordyceps fumosorosea ARSEF 2679]
OAA73183.1	MAVYKAYTSACGHFQLAAWVCFMVVSQAAAIGSGLWIRYWTDKNVKYDGNYQPGQFIAVYTALGLLSALCGAATSIVVNAFCRISASKKLHDNMAAAMFRAPLSFFETTPAGQILNRFGSDMSTIDGEMIGTLTQAVSCLTSILFTLAIVCWSK	multidrug resistance-associated protein 1 [Cordyceps fumosorosea ARSEF 2679]
OAA73218.1	MKITTLLLTTLAGSGLAIAAATAPEGAGLEQRQTCAIPNVGCYSQRDCCGGLKCNFSESCCIDGGDGDGLAAREKRQNCGCCVK	hypothetical protein ISF_00119 [Cordyceps fumosorosea ARSEF 2679]
OAA73529.1	MLMPVREHLGAAREADADAGAPAAVPDGRRARRDARGAGSGEGRGRAAGAVPGLVRPVGGPGGGVHAVGEPPDDAAQQAVPAGVPPHADGQAGGARLERLRRRGPVGPAGARDDGDGARDEQPEPAGGGLRAAVQRAAGGVQGPVDGYRSHRELAAAARLVYRRARAEGCRPDRDGIWVDAFDEE	hypothetical protein ISF_00430 [Cordyceps fumosorosea ARSEF 2679]
OAA73605.1	MPPSVSSSSSASSSSSSPSLLVHPPSPNLSSACVTLQAAASSASPADPCPAEEASRSGALSQAAPSASPADPPPPNEGASGPGALSWLSWLPAPDGDRDEEIAAWRDSGPRHLRLLCCDDEGDDDKEGDDDKEDDEKASKAESGPEVRDESGNSNEDSSTVPEA	hypothetical protein ISF_00506 [Cordyceps fumosorosea ARSEF 2679]
OAA73668.1	MNHPQDATNVDSKGIAFTIRSVFFIDPKKTIRTILSYPASTGRNAAEVLRIVDSLQTGDKHRVTTPINWVPGDDVIVAPPVSNEEAEKLFPGFRIVKPYLRFTSLPKA	Peroxidase [Cordyceps fumosorosea ARSEF 2679]
OAA73702.1	MRAATALGATMTAEEECRCVFGGGGRSVVRKLRAIWNAAMVMLGLARIVVLVRIALVLRDIKAARGPPGASGADPAVGGGVRGCG	hypothetical protein ISF_00603 [Cordyceps fumosorosea ARSEF 2679]
OAA73709.1	MQVEPLQGSGCASNFLAGNLLFFIRILIVASPKDEVGPARAEGHVGVDQAVEGLAQPEHVVSASVCAPQKVDAETNPRFIHREAVPRVSAPTCQADVAAIGHPFLPTRK	hypothetical protein ISF_00610 [Cordyceps fumosorosea ARSEF 2679]
OAA73769.1	MLADGLMLVRKSTKLDGLMLVRKPTKLDGLMLVRKPTKLDGLMLVRKPTKLDGLMLVRKPTKLDGLMLVRKPTKLDGLMLVRKPTKLDGLMLVRKPTKLDGLMLVRKPTKLDGLMLVRKPTKLDGLMLVRKPTKLDGLMLVRKPTKLDGLMLVRKPTKLDGLMLVRKPTKLDGLMLVRKPTKLDGLMLVRKPTKLDGLMLVRKPMKLDGLMLARKPMRLDRLKVVDGPTEADKLTVMDGLMLADNLMLGLELMVVGEPTVEDKLILVLQILGLRLGRIGPFRQDWVCGGILGAASPFDSLDTGSFRAASVPIKDSRRVRLWL	hypothetical protein ISF_00670 [Cordyceps fumosorosea ARSEF 2679]
OAA73773.1	MVGSASLGAFNGPEPVKAGAAQSYLALSNKAANPLATKVSALLSTSYSDADFRSAVALIDHRGIRNDGKTRRRLRLELQKEVIENNGKVLDDFSSVSDVSRVDASNLPSPANRNSN	ATPase, AAA-type, core [Cordyceps fumosorosea ARSEF 2679]
OAA73830.1	MPKPQPKFPTNTPTFAAQTSPCMPPITGSPVILHIHIEAQWWGRGLVLHLGHRFTDIDDGGAGTTSKHGMGVYKGGCARATNFSVPLLFLLLSFARASRRIFLQCLWCEASACIINTHNSTLTPARPFLLTRRGNGRKTNTKKSLGAPKKHAWQLSWEESQHVQVFSPVLPHRAAALARGHRPCHRRPAKSRHRRAGTGTGTGTGSPPPPPAATVGRLGVLRRGPVELHDEQLAALRRRPLERGRAVRQGHDVLPRGADARPAHPA	hypothetical protein ISF_00731 [Cordyceps fumosorosea ARSEF 2679]
OAA73909.1	MQSERESSYPKYLYRAHTYGHPYPRYDDAQTDSFLDRDCVSDYRSWAEYERNLKIGGQFEPESPPTEDVFLELSQHLRKLRIKRNSGGNYYRSRMVSLSGNLCWATHRLCEVWGMAARDGKTPGLAVLDVRKIQERGFHVWRVRDMLRFLRKSGLESSIEILDDARSWANNADEYVCWDFVPGEALVSFTPQPHLRPTNGTARTLLGGNFVNTCNLSAFGQLRKHSVSLNDYVQLVAGFIRTVAPDGLGWEVQIQLLEQLANSFLCPGAWGYHVSASDKELKRRLNAIAYTDG	hypothetical protein ISF_00810 [Cordyceps fumosorosea ARSEF 2679]
OAA74007.1	MTGLHLDAGGAMGDFLLTFDAGKGGGGGGSVGDEDIDTLITDEFLSAQLQTTEPILQPFDFNHPPGMS	hypothetical protein ISF_00908 [Cordyceps fumosorosea ARSEF 2679]
OAA74108.1	MVPTRGQPVGSEWLPAHLGLGARFLAQLVIPAQRVGQHLLPPHPGRRLLAWRVVHAAVPCRQIRGRCFCRRLCCLFRLHADGCRVPIVVDDVPYLTEPFPTRRAFMPATGHAGRSSFYTRRPFLRNIHGFLV	hypothetical protein ISF_01009 [Cordyceps fumosorosea ARSEF 2679]
OAA74155.1	MQKASPLYAPALSNRPRLSIVPPVRMRNACRQHRSGWAANTLAARAPELDEQPVSRLRGGGRGLQHAEHDGGGLGTLRACGGRVFFSD	hypothetical protein ISF_01056 [Cordyceps fumosorosea ARSEF 2679]

## Sheet: C.fumosorosea_grCorFumo1
SeqID	Amino Acid Sequence	Description
OY7_000040-T1	MHQLPSCRNGTPSTERFTFFTSEEVFEVPRRKVKYNKQHLRCSHCERLNIECVWNMVHRDTSGRRASQASQRSRPTIPSGGGNDMATLTD	OY7_000040
OY7_000053-T1	MVMNVTMSNNVPGQNGLTICRLTLRKWAPFCNASSTLALMRTPDVRLTGNGSLPIVQHRIAEKARHAIPVNRGPIN	OY7_000053
OY7_000614-T1	MDTDAAQAAPSDPVKRLPTAPQYLQQRRALLLALEHVVGDPRGAAVDAALEGLSWASRARSASPARSSSDLSSSARWWSARSRAVRRTRRAVSAACAVRTWLQLVGQLLDAPRERGGAVGLGGEDLLDRGVGAFERADLLREGEGGGTSAAAAAAAAAAGETWSRALPRSCRRFGGMVGCVPRRHRERE	OY7_000614
OY7_000885-T1	MSSPRDRLRQGLNPLSTSALGSLVAQQQHGTPISAISMASPHLLALQTPVSALQPYNPQEWVPPGAPQMPERQVQYAAEAQASAPPPPPPYSPPRSRQQRPVSTAFEYALAPMSTPSPRISSNLAEAVEVPATVDSACPLSGAEKSQSSSRAVPQMHTLLLSPDEAWDPRLFMLLNPSARLPSITLDIADEMGARYATPTPASGTTTLRVSIAERAKYRPKCGPNHFSSDPATTT	OY7_000885
OY7_000916-T1	MSVCNTVAIVGAGPSGLSMLKTLREDGFDVTFFERRTWAGAEEAIIATNEAVKKFPVKDSAE	OY7_000916
OY7_001062-T1	MASNNLASDNNDSDNNDSDNNDSDNNDSDNNDSDNNDSDNNDSDNDDSDSND	OY7_001062
OY7_001150-T1	MDLDLTTTGYITQMFNVGSYFFALVIGLVIRQTGNYKWPVLLFGLPITVLGIFVAFGGGTNSVCQQVAIMSVVKHQHIAVVLVIQSMAASIGGGIGRSISSAIWQGVFPGKLREYLPEADRQNWARIYGDITVQLSYPLFMRLLSWL	OY7_001150
OY7_001316-T1	MLRGLGRTARCNMDVGIFLGSVNGFSTPARPNGHCPFGMWRARTVSGQGRKKKKKKKKKKKKKKKKKKKKKKKKKKKKK	OY7_001316
OY7_001371-T1	MDHSIIRITKELADMQRSSDLSIAVACRDVDVRNVKALIIGPHETPYEFGFFEFAIKIPKSYPSTAPSVQCLTTNGGRCRFNPNIYSNGKIHLRDLER	OY7_001371
OY7_001396-T1	MPASVIPNHGDRTAEEATAALHAVHAKHDQILRMLRTAHRESVEALRAVADADLHGRLRRLCPTAEEEMAELFEVMDEGESGMAAHGLMLLALLDGSGNMVRRLRTVHARLGGRD	OY7_001396
OY7_002021-T1	MTASWWEPGFSTHLHLCLCLCPAGQDCGWRHLGCVTIEGQRWPLTGSGEVISSACFLRRKKGSSVPDRNCELTRPNWTAQVHY	OY7_002021
OY7_002038-T1	MTPGSTPNDIINNLNPLFIVIIIPVTDFIVYPGLRKCGVRLSSIREITAGFVLGSMAMVSACVTQAYIYKLSKCGSDINAKVETGREDCAAPISVWVQGIPYGLIGMSEVLAAVTKLE	OY7_002038
OY7_002053-T1	MVGSEDSWEGKCDDNGESYARQIFHVYTCWNFQESGYGEWSLQRNEKNKLRSDDVKASLAAAKGTELLSTLPGQDIPDDEWRYVREVVFQPDEEAFVGCGDVEYLPETDEFRVIGA	OY7_002053
OY7_002056-T1	MVSICAANGLGKATPTIPLFWYKSDMDEVSPVADSDSLVDKYCGAGASVERTAAFSWLKEVMNGAKDVPQKGCSKKTEPSVVLDKSQFEVLPKLIADALLALLGKSISPI	OY7_002056
OY7_002137-T1	MDLNRLHGQSLRLASTMHAKSMHAKCVTAFTSVALNKAFGAGDDGVPDTPPTVHVPAGHAASILRQYCAGFFLDAAQDAAPWKAFKSLFFASIARIEKSASGDRRHYCDVGGPRPQSRDGCAQPRN	OY7_002137
OY7_002192-T1	MDLAPLIQGRSPVQILLDTWALMNHSAADTQLDFIRAQMAVVLKMDDSTNNDKVTALIMYGMVCQETAHRLDNDRQDSLPSWRAALSVFQTALDTATTEEDNLRSIAEEFLEDCSSEVSRLELLSGG	OY7_002192
OY7_002281-T1	MCRQDWTVTYWLCRDAKTSFFQLMPHDGCGGCGKPAAGASQVVASSTEPAPCGPCIAAGAWVSPGGVWMTKEAAGDKPSK	OY7_002281
OY7_002434-T1	MVVRGSFTDAKYIAPEVADLLSAAILNHVLLRTFFECAIVVDIFAQEEAKEDNEVDVPGRFVAQHVSKSM	OY7_002434
OY7_002711-T1	MSGKGADVNARGPNNRNAVHAASESGHIEIVQLLLDRGADVNSQDRWYRNALMDALKGGHLEVVQLLLDNGADVNSQDLWYRNALMDASKGGYLEIVQLLLDKGADINAGDRYDRNALQAASESGHLEVVQLLLDNGADITTGRFYYRNALATALSKRHWEVANLLRTRSAMASSSKKKAGLR	OY7_002711
OY7_002779-T1	MAIALPSSAPESTVEAGAEEASDSDGDDGDDSDDSGDSGDSGDNGDSGDSGDGGDGGDSDDSGDSGDGGDSANFKIDFAKSSDR	OY7_002779
OY7_002807-T1	MCTKFITTITYILCEERCVEVKSRVEQMGCQEFFKEGKACPDPKVVPLAREEKGYMCAKHRL	OY7_002807
OY7_003033-T1	MVVEVKISREDIARFGTEDFRWPKEETFTMDPAAYAVGGPSNKIIDGNFGEMDTRLGGFEPVMTFRFSKLSTLREVTRFDIYHSNLGGFNADCAD	OY7_003033
OY7_003037-T1	MRFRALDAQKKLAIVTFSLGYPADGPGDRADTTLSMVCLRIGQADKSSGGGGKDSPAGRRGVSVVTLAVTLVMMLLAF	OY7_003037
OY7_003083-T1	MRGEVTVRDEQLLVVLLAVWQMCYVQMNLAVRLSRSGRSTSQIQGAKGTVFSLMANEYSDPQWLLSTNIVE	OY7_003083
OY7_003274-T1	MTHSACTIHMLNLPEKTAKRDFTHGVKHLEEISEDWLCARRTLSILSVLARKWHCALPEEAAQILQRTDELYGHYSTSEVPSPKSSAGLSPQAHMEEAAAAAAGVQAHSMQSSHFSKQHPSPGKVQFAQSAIAQAAGPPVSIDARLDMNRPVTPQQQQQQQQQRQHQHQHQHQFQRQAQQQPQRDMGANTQHHVAYAPPGTMDGWAQPIMASSSTPSPTANAYPVSSAATAAGLNSNPDTIREFARSRMAPAGSEGGVLTGQGAGLDNNQWILNDSAKWQHNFNGWDLGQPLPGAMQFAFPHQPGSLAPNTSPAAAAAAAASMQTMGHPPSGLEAFDASMHDTRWLPNLE	OY7_003274
OY7_003404-T1	MSLPGRAGAPTATPPDLQPADDVGQQASKDLLADEEELVDTSDHCLAQAVSAKVKEEEAEFLAGSRGFLRGCCTVPT	OY7_003404
OY7_003597-T1	MSSPLSDMKESGSGSIRRNMPPLYQVQSATITNEMLVQLCLSTASRVKGRATSDRRLVVGGVGQVLVQRNEDTAAQCILLDNSVSLVTPSPKAVSQ	OY7_003597
OY7_003865-T1	MVKSCSLAVPLALSLAPLGLTYKLYCVDKNRYCTAHYNRYDPTGDNIGRVKEILAEQGLPVDEFHVWESLLQCHKSANGTLRLEYVMTCKEWGACSRNKKMGAYCPLPLGVPIPTSRPRIPPK	OY7_003865
OY7_003905-T1	MYVDSLRKTVVIARDATRISPLFLSNLILMRARSHKCILLLRNARVFHIHYQNPDIT	OY7_003905
OY7_003948-T1	MSIRKELTNESYMPTCRSATADRKEQIRLSVVTKKLRGESRFKLVACLFKIGAWGAYSVGVHNFNDVKFAIRKSNLECRFATGIQYIGRNSPIIKKQVHCRRRSVSSSDVQCCLVEVISDGQVNSSNSE	OY7_003948
OY7_003953-T1	MDIPTTLLASGRSLRNEEALCDDEIDWGEELPDEETLPNEETPPDEEIDWDEEILDEEALPNDETLPNGEALCNGEALTNEEIFTLSGIT	OY7_003953
OY7_003958-T1	MGSNPLEVHPTGFTGWTGANFEFDNMGSNPLEVHPTGFTGSTGANFEFDNMGSNPLEVHPTGFTGSTGAGFEFDNMGSNPLEVHPTGFTGSTGAGFEFASGGDFGQGFYDSNSSGLSFNGMCSNEVTPSIPRQDTAFLTQHRTLCESRSS	OY7_003958
OY7_003996-T1	MDPARVVRRWEARSSEGLDAKRRRFVGDLWGSTGIDASKSARRLDVEAKFASWREMYGAEADEAMTELATSHMEDYMWLKSRKF	OY7_003996
OY7_004327-T1	MDNGRPYGFAVALSPSPRLLDKVNNPVRQSGVDDGYDPLDVDAYPQSRRGGDPAMTLPGSPPDPGTRLLLRHYTTMVCWAPNRLGHCLALVDRTAVDHTPLAANHSAADPRHELDHSIVDGSCAWLHHLHLIPAVKL	OY7_004327
OY7_004371-T1	MAPAKAKGKARAAAGYKGSAEMKTADEEARQKAIGGPVTPKKRQTKRTRPVNDPLAQSSSSKVAQDEEDEPLIPLTPLTEPESEGAESEPEDEDTMEKVNGKRQAKQDSPAPKKKQKIDNQLNKAVTPVPTPKKEKKQGKAKAKDTKQAEEEPKKTKDQLNTKDQLNTKDQLNTKDQLNTKDQLNTKDQLNTKDQLNRKYAAAKVKLVKLVAGQDNDTETKLRRVLHTISMMEEAINDEIPEPPGGEKSLQPTALILYQAAKEFWHLWPEEDRYRWVRKDQHYLHATKDSKSFQMTGSPIARNYIRQDANARTPFSIRTIQVKVWTRKKQLALPSTKLHETDYETAILDKIESIDPRVWASAVAATKAQLEGSSPKNRTTKASTSKVAQDKEVKEEQKD…	OY7_004371
OY7_004375-T1	MPEPTRTSTRNYNKVYDTLDPRIRAIVPAPGPRTTAQAFLKAVRDHWITIHNLAISESNQELKASRNIRIGWAREAQQPQIPSWARPTGPTWMAPTRPSLPQHAQHQNENSRGSSYRPPFQPRPNHNNWPNNGYSNSKDNYNGNTGQGRQPFRSQDARFSGPNPPTSGDGQAPPYGRSP	OY7_004375
OY7_004383-T1	MEVAVRVVSQPIFLGIFIDSCELVNDLGDRACPVPQVPIQCPEEEKTGLSPTSPEVTDMSGMDFRPTDQAKLSK	OY7_004383
OY7_004461-T1	MSLEELGGAFEAHNLSLDSQDYLSHKSPPRGAQQATMICRLMHHFIALHSTRISGVRSLSRHELSDVDQRRRSRPGATKGDGAIHEQK	OY7_004461
OY7_004827-T1	MSSAFLEQLYRVSRAFAKANNEVRQLWVSLRGGFNGPLCERGSFIEVIQVAAVPVQASHIEFCQPRPAVVTVTRPGRAICCLFAKQSVAEEDERRNESNRGQRTYDGTDNDGHLV	OY7_004827
OY7_004849-T1	MRSLVPAYRSPPSPPPSGFMALTDTSGQHMQALYTYAPQTVLMQAEQIDEEVGHEDEAITRGAASAAPSPSNREPPRLFKVMVGPGCRCSSVCRPRPATHGET	OY7_004849
OY7_004963-T1	MHEIRRVVLINERADVSGPNYAGITPLLVAVFVGDEELARLLIDKGADINWRDQKGATLLIEPTHAMQEGFAKLLIDKKADVNASDADGKTVLMHAVLYGNQWDLQLLLRCDAKVNTSTADGETALTYAPEQQETRKQHA	OY7_004963
OY7_005189-T1	MISSGRDPSLRTGPKSNRRLFSARTASLSQVLHREVGFGPYSSRIWYCTPEISIEELSSSSDGFFRQHLMPT	OY7_005189
OY7_005379-T1	MPRAQNAEQLPCSRLAGASSGRYTTSLVVYFEMMLPRLIVLMFAVVGTVIALAGMAGPMVAGCSLPMRDGG	OY7_005379
OY7_005396-T1	MKQQKTFFTLASTIYKPNDLIQLGQVIKDAGQPFRRVSPPPKLTEKLEPRVSTVGEFMLRDTDTKDVFVSLVGEASGLVSSKLSARHAKDASLSWGASELETHYFEPDEDKTFIQLLEKDHAVAACLRKLAPFASAYVVVGVKIAIKPGAITCDTNEETTINAKIKTLVDPSAAFRMGGGAGASVKSGSRMRALPLESYVLAYQLREITVNPFTGKARIGDFKKGGDLHEHGADENPAAESQDSAAESQEYDIVIDGNDFGSELPASLYKRQQVKLGEEDSYLLLSATTTA	OY7_005396
OY7_005400-T1	MDSLAITYASELSRWGIATSIVVPGVFTSGTNHFAHAGKGSKEAIAKEYLEGGPYHNMPELVMEKTDAKGDEPGDVLDVAKAIVQLVASDDKMPFRVHVDPWNDGVEVVNNARDQARLNWHRKTGLEVLLDVARD	OY7_005400
OY7_005403-T1	MQHARDAICAGRGEPGAGPGVRFRQFVLLDDQVQTNLARAAAPRQSGDVGARRGDGTTRVKLVDADDDDDVYSGSCALHVGDVLNAYETVARLDGATRFPMEEPPEGESELWTFCDLTYIDESRANQS	OY7_005403
OY7_005479-T1	MKELASQANPSYFSQNVNDDFAVILVNRPVQANHAWIMLRIVFTAHDGLK	OY7_005479
OY7_005480-T1	MSEAQAEALDLVHYVAEAQGLTVALDPGDILLNNNLSVMHGRRAFHDAPTNGQRRHIMRLWMRSGMHAWKTPPELEQKWHRVYGDSDRRSSVCWKVRPEDTEFDRVIGHEMTCS	OY7_005480
OY7_005483-T1	MSIMQMVASGFLALQLEGSFIPLNWSIAPAVEYFGEEVKVQGAISNGKMEKEKHCIIAQ	OY7_005483
OY7_005484-T1	MSGRASKLCPQRDRVSDEKMQNLEPTIQNIVQRVLQHRQAHMTAFQNDWGLFSLDSRTLVPAPKLYGNSLHECHFVLVKTDESIDREFVFEPTLGSMSI	OY7_005484
OY7_005493-T1	MATISRLWSVVAADTATFAGTSILATLSSLTTAGAPMRSSIVHVVSFGLNRSQPSAGIGSSVRIFRVH	OY7_005493
OY7_005554-T1	MSPQTGPHPADTGWPFQLAPAQLLGQPAERTTATVDRVAEILGRLFRVHADAAGGLCRLQHSGLDGEQGGANLAGHSL	OY7_005554
OY7_005678-T1	MCQFQEQYGACGCFAQLTIVFPLDPSLCPRAVERARATNTEVRYCDPPATMPKITSFTICKDSELCRIKAFTDRKWQCCSCRGFVERLDKPHCKRCFHTPCATCLLFRSEV	OY7_005678
OY7_005733-T1	MTGMDDCNLAALAASLQGCVYTGVSGYEAKYFSTPSSGPLPTKPSPLQARQDASLRNALAEVLLRRSELVQLINDVTGTSPHIFIPDPAPPHDAAEGSTAYLFLIRDEDAASARTKSPEAAAIVLGVLQTAATASQPTDGLLVEFRRPSGQHVCGPARPALPACVPHPHRRHDRETWTV	OY7_005733
OY7_006341-T1	MAMVLEDDLLGVDMARVLKLCVVHDLGEAIHGDIPAVEASKFPDKGKQERADLEHLTRELPDSLRKSLLSLWEEYEAGKTPEARAVKAMDKLETIIQHNQGQNPPGFDYGFNLTYGEQYMSYAPIFTMLRQSIDQDTRQNMSSQTEQS	OY7_006341
OY7_006454-T1	MNTDFLPYDRGINPGTLYVPTLGPTKTHTIQEINQQRLERIQNQLTLEGKRALQENSTYLSRRWLEVLPTTKNNQLADFNVTEGLRGMKTPVRVLNATGKFATIRSYGH	OY7_006454
OY7_006500-T1	MSYEEIKSIPYSCVIRKEFVNLRLSSARFDPQSRFTAAHFIKFVAAASGRSGTSCEGAAGNAEEGKKT	OY7_006500
OY7_006513-T1	MTTITSHLKFLAVLATAVLAAAAPTTNFNGFITNSTNTTAATDGAVDAQGTLSLHGRHPAPGAGSGDICVECAKYCRDPSNAVAVEGVCIFIKCGMQCLIA	OY7_006513
OY7_006591-T1	MVFTFKALDIHAGGQLPRRPARLPRRVVRSEDCVTKETCAPDPEPEVKIRSKAAFSIGSDYHADRTGEKPNAESN	OY7_006591
OY7_006629-T1	MQSWPNPSQDDGGGQDAWQSSFAFADQGAAFDPNQQWAQQMAGQTADFSHLHQDPAAFFDASSASSNPYMQAHGSPTNQPTFSTQPYGQQDQDAIDTAFHNEMQPFTSNHSRNRICNNIRSTDSQSSMELSRKPNKPQYNHNESSRRRARIAIVQGSFRRLPVNQHSIKPIRI	OY7_006629
OY7_006656-T1	MSSSLVAACGKLELRRHPGYHQCITEVAQDRHKRRQDELPLRGSPWRHESNENGDGQQV	OY7_006656
OY7_006792-T1	MALAIQYGINMITYNEVGIKVFVQDGEGTSWVKYEGNLNLDDKKPEGYVKLADLGRREVIKGGEFLGWVEAGLEAPGATLKGALMNLNHDEDSANRRIFRKTFYPER	OY7_006792
OY7_006819-T1	MILTEEQISLIKEHPLDDLIPPRPRMVPIIHFETIAELLEALRDGTRVHRNLYAHSRLLHGDISTDTIMTTDPAAADGFKGMLLDPRPPRDCAVLEGKGHPYRYDPESSLLRAAADVRAPPPGRSGSGSAHATRSTATGRPLADTRVAAASRCRL	OY7_006819
OY7_007057-T1	MLSNPTTTRPPRQRQHRRQNSTPSAFEGGTAQNMPSGINRRQAVAHRRGLSLDIRRFQMTPPTSERQDNMPTHRSIEYCEKRSSNAHKHARARIPTTTTTPTSP	OY7_007057
OY7_007187-T1	MARRQHLTLSLLLIVFLFLSVSYFFTSAPAAARDRAAQFVGGAVTPKQQQQQQQQPKEKPLKEKPTQASKTTDSDDAQIVKDTASPSATTPSPSGGFSIDVDSLPSLDGDSIAPTLENATLK	OY7_007187
OY7_007236-T1	MEQQQQQQEQQQQQQEQQQQQQEQQQQQQEQQQQQQQEQQQQQQEQQQQQQEQQQQQQQ	OY7_007236
OY7_007394-T1	MDALELIELLGLGPLEPLELEPLEPGPGLGMALKLEAPTVAPPVLVAPVIAATAMADGVTERHQVTARRPERRAWRDMAATAGELYKVEEVEEVEEEEDADVCVATEAVPCTMMQVYVLMERRGGREDRQ	OY7_007394
OY7_007433-T1	MEQVLLGNNTVGFTPLPGLLPIPLSSSLTCNSSSSFSSSSSSSPSSSSSYRQPFCVSPEGWGPLSGNAFYLTPCFVDGAIGIVSICAIICGLGAVTYLLRRGIVGKALVGKWHFAAKLVCWFPQRPWTRDWREFG	OY7_007433
OY7_007810-T1	MDDPAIPRMQLKQYKQFVAIMDEQFSVKQLPDNLLKQAGIVSSTDGDMEALARLAIHQYNVVSFTQCVK	OY7_007810
OY7_007837-T1	MLGGNSDAQVLAGGSQPSTPAQENPRWIDAPKGPSNGDGAGREQSRGYRDNTRDRPGRSGRPRSHERDGKSGGHGEFRDRRSMGGDPSGGAGAGEQQGPRGPGAGPDWPGNANNTNNHGRVSGGRGGGGQRPDDRHRDDRGRKRRSEEGFGNLSNDRGEKRVRR	OY7_007837
OY7_007848-T1	MAVLMDGDSAMPANDALALRLIWTSPPSPPQNTKSIVDYWNFDGVVLGAQLRDWKRFRWVQARDRQKYRKQFIELVHQRLRAHGVEEMPRLLPNHRRQSRRDNRLEFYHHHLLLLLLLLLLLLLLLLLLRLRRLEKMDPDNVAHHRLAIARGSIESQETPLRWMAARSAEMGTRRRVRERAAPGKHGVHLGPDSRSVPVLLLLLLLLLLLLASDDGGDNPEPPPKRRAVATPRK	OY7_007848
OY7_007988-T1	MPLPARVHVRDRPGHPTPRTTEMPVEHTDTLAHYARNRAALFQRRYDSADRKRDAPPAKEKPRCGVVSAPSMSEQRVLPVLLSKDAIVAAAGQQVCTLTTLDSQASAVTASSGPAAGRRVVLDPNSAHANLARGVRRYPSPRLVPHGPWPPARTQNICSKPWSDRHDAPNICVKCMYTRALPLSQVSDLAQHVGVGPSTASVDGWAGRSRAETSHLGEAHRWMRWSAGKPRTGP	OY7_007988
OY7_008027-T1	MSPEANADPKTQRHLHYATSSAASNVSGSSFEIDSSEHKGDTSDDTLLTVDHIGYEGIDWNCIPGYSISRRRKRPRTGWV	OY7_008027
OY7_008132-T1	MQEGRKRLGQAILPIAEQYKGRLNFITVDAKEFEARATKVGLRPGEFPRVAIQETAKKNINLLLDQNKVVSHESVTDFLHAK	OY7_008132
OY7_008152-T1	MSSDESITDHPLYVENDPILNAPVFPALPKRESQWFVEKLPLMGTTTVVDRLPQATVTDVAPTSPPGPHRQVSSEGAAQVVVLKGAADLKAVAV	OY7_008152
OY7_008157-T1	MAWKSTFSTDPDDVRGRRKLRVPRGSGGNSKIDAPKQPRPSVTLRKLAGF	OY7_008157
OY7_008218-T1	MGPGTGPARKLTLPLVSSQLFATRRGERVLEEAELGYVLAAAFEVHNALCYMDEEGEDEQAELEALRTLHAEFARQATALGLDGDERGRCKEDHLVLLFFQKWKVRQDAQVLHHDM	OY7_008218
OY7_008253-T1	MSALDPDAELNAAWTADVWINTDATVGFGHCRLAVNDNSSSDNSSSAVPTAVQLPQSGMTPLMYAAKQRDPSVTGDL	OY7_008253
OY7_008264-T1	MVETLDFRERLGKLAHIEGEQKKQAKISATPLKGLITNSQALLTVMTEEGLDALKYEKTLASCFFEDTRQFIR	OY7_008264
OY7_008395-T1	MLGRLPQNAFQDLCVNLTYACYLSQPGPFVSAGELVAAADIHEAAPWLRLSK	OY7_008395
OY7_008421-T1	MPNNHPSTPEAGIASSLLSSLESGLPDFGPNDILGLRTNRYARQLFLELLASRPDFFLGAGGGSRSLDGSHREVTELERYLADYHAADEALLFNSGYEAKFARWRRSHDRAT	OY7_008421
OY7_008561-T1	MSLLTQVSLAIVALFSKGTFLRRHNTRPSNQALDNQEPDIELPDWNSRNSEPEWSAISLTD	OY7_008561
OY7_008872-T1	MASLVRAVMFNVLIWDNDVVPVDARWLWMPLIIGIYGIILDFWFYWYHRLMHEIGSLWQFHRTHHLTKHPIPLLSLYTDGV	OY7_008872
OY7_008885-T1	MIIKFLLSFTAVLPLASAAAVPPPKRATTPTNDPFYVPSVSFESSKLGTVLRDRRITASFFGFIPQLIDARQLFYRTTAIDGSAIATVATVFRP	OY7_008885
OY7_008915-T1	MGLPLGARPEVLHLLQDVLYVLFAPREMLVQALGQHANLRGGGGQRLICCIGAILQPIALASQTLRDL	OY7_008915
OY7_008942-T1	MTEKPLLLELTTPNGHTYEQRLGLFINTEFGQGTGAPITAMDPATEIEIASVAAASLDDVDRLPYTSALGEDVPGGIDAIRYFAGWADKMQGQALYPTPQQLAYTLRQPIAVVAQIIHWNSPIMMAGWKLGPALAYGNAVVLKAAEQTPLSILLLARLVREAGLPPSVVDLLNGRGAEAGAGHVEHPLVDRDVTLETGGKSPLLVFADADLEQAAKSAQVGAMAYSGQICTSTSRILVDRKVYPAFLAVPPKDRRGDMHGRATSGGRRPSRGPAGVQGAA	OY7_008942
OY7_009078-T1	MALEVWLLAFNEGAATTLATLLTPPVLATSITLLTIVTIIAFTAVTITITITIPIPIPIPIPIPIPIPIPIPIPIPIPIPIPIPIPIPIPIPIPIPITITITITITIVAISSGGSGGSIVLTAQPEVIS	OY7_009078
OY7_009194-T1	MRGINASPCRARGVSARCDNFLGTCVGVELLLSLKYPDDEPALQADCEGGGSPDHDD	OY7_009194
OY7_009370-T1	MDQEEEEGGEEEEEEEEEDENDLNDEDYETDGKDSYSSDTDCEDSDSSEENPEDSNLFIEEVSPYFQYAEVVSCLIGALGVVSNFDYIWVVSDHKRATLTYPRRAHLQQVEVYRESKDIAKDRSNHDNRRPVATGFEQFRQYYPGWGRLTRFGLGMQNLLDALDDLHALGALKALTALDVFKALGALDDPDASHDPDELDELDDPDASHDPDTSHDSDKPERLLPKHKRKTPPGPPNTWVEGQGPKIYIGGKSLSDILCCDEPSEKREQEIPPAPNTPGAPAANLGCTVSTANDASNVDTEMIPVSLHGLQMPSNDEPSEKRGVRRSLEIDEGCDDEQTDLKRRRLVETQHSELVLRTHPDHAMPLSEHFRKSRDGSYVGLPGRRGVDQLT	OY7_009370
OY7_009414-T1	MDENQAVIIEFRDCDPLETSILARLLPSIAGDPIPPLPSWDDPWDDAPANGQNRLLGVDTTDPIPPAPARLESGRPRGSRRGSHGPRGGGRDESRASRDLDSGSGPPRRNDGQGRRDQQQQRRSGGQEASGQIWNGRSFHRTAVYRHIM	OY7_009414
OY7_009425-T1	MHLQDEELPDEETLPNEETPSDEEINWDEELPDEETLPNEETPPDEEIDWEEELPNEETLPNEETPPDEEIDWEEEIPDEEALPNEETLPNGEALCNGEALTNEEMCFLKRMIFNEPWLLY	OY7_009425
OY7_009457-T1	MTSFMRSPAATGTSTRFMCMIVRLTTVGSFHSCHSGDSILAAAAAAAAVHESLLVRLRRGRARPAALIRAYLDQRGSR	OY7_009457
OY7_009558-T1	MDAEQLKKLLREAEKRAKQRKGNRKSANTPRKQNAGSIGSDNTPRESDNALI	OY7_009558
OY7_009924-T1	MCEYVEAEIVHGSCRRAPPHWTVKRLYRRYAARPWPLGRCAAATHNPGLARLERTEQRRGACRHCRDSGASVGTVVYEHHDFSWIEGENEGGRTRWKGFIRRVLRI	OY7_009924
OY7_010125-T1	MGTKEGQHALNQAIETITLYLDPRRPIRNTGGSYASRARDALVSRWVDGLEPLVPVFAKQHIMKHFDAIKRPL	OY7_010125
OY7_010152-T1	MAAKKSRDVLQRSARHASLDTSHFAWELRQEPSSFTAAGTIASHADLDPIPPSKRT	OY7_010152
OY7_010156-T1	MSGKEIEDLKKQLKEARAREEEAKAREEEAKAREEEAKARKEEAKARKENERHKKEEAKA	OY7_010156
OY7_010157-T1	MSFSGVLTYRPDYSQSFNFSSPHKTQIQDLMRRSDLRRRGWTNAFRIMNHACTHLRLHETHLYHIE	OY7_010157

## Sheet: C.militarisCM01
SeqID	Amino Acid Sequence	Description
EGX87623.1	MSPTYPEVTIVNLPSSFMIVISITPSYTLLAYHSRFLDKCRLIIKDFLIASIFR	hypothetical protein CCM_09678 [Cordyceps militaris CM01]
EGX87625.1	MLSSPAHQRKTPVALSFMRMKIKAQYRSTPPLPHGAAPQGYEPIAAKVCIAKSMGKTGQRQKVSYPNWSFFFPPVPCQEKKKKKRRRNAAQEMADQPRLTMRQAKTGRPLARQPPSSGAYSPRLSAGASWMVWRKGRLGCRASRETSYRYQIDSSSSLAHMCSRVFPQSPQHMS	hypothetical protein CCM_09586 [Cordyceps militaris CM01]
EGX87627.1	MGPPSCFYTVRIKVYLNNNKSNNNVNLLNKLRIYFLYILGYIDLVAKSLI	hypothetical protein CCM_09588 [Cordyceps militaris CM01]
EGX87633.1	MSNATQSYMARPSRASKAAADARRPPPGPVGDAARARAAAQQAGVVVGAVRIGVAGAAAAGVADRMAVAGGRAADIELQRGATAGLLAVVGGDDEGEKRWALPAPPRPVRTYEGIVRCVLSLVEFVEEAKRHGSRPAKRKSSSFKKRTWSGRGVVGGPLYKGIQDASNGGGV	hypothetical protein CCM_09594 [Cordyceps militaris CM01]
EGX87642.1	MNYLLMQIFLPFSPNKPTEGTIMFGSALSLRARHLRCHHPISASSSPSKQQTTSLSLSQRRLSKSAMQVVHQICHQSTVMYPLRASFRDRAEPSSGGSSGPGWLLLPPSVRHAAHWFLFLPRTAHKLLCRTSPVLGVDGRASTNTMRARFYGRISGGRVIDPLDAAARWQDLHKPLRTGSITPLLLAEKKPGAVVVALLILERHDAASLGLCRL	hypothetical protein CCM_09603 [Cordyceps militaris CM01]
EGX87648.1	MSRTWTSNQNARPVVAIPSRHPPNSLQVRYHSDDRPSASPANQLRSTKSTSSRARESEFSGFIRDKDRRPFFFMPYISVNYCVRRARQYMFRRTTEYNLVPKCDCDSADSHASAPWRTPVVDDLPMCTALKLSASPLR	hypothetical protein CCM_09609 [Cordyceps militaris CM01]
EGX87667.1	MTRHTYQRTPPPTRLHGYDANSAPDYNWRLQCVQCGKKPINADAYIYHSCDGMKPDTEERKSRIQFVDDKLAEQQRTDDRPSMIACQPATEGLTTAAMMVQEPVHQAAGLSAKDDSAIHASQYQRESIWTQPGQDLALYFDYGEEARRAACEGAGQNPPIGAVPFDRVSLWQAPM	hypothetical protein CCM_09628 [Cordyceps militaris CM01]
EGX87668.1	MADNPSLRQAPTLYSAEVANMASEFKEDPFREKDQVSSVITPQQSWQFYETHGFFYQRNEIVGALVHALFAAGAASKAYLPLFQPQLSQDERIMSILTNYPYERPDFHFGWGGLDFFYSLDVSNSTYNGIAIYAAEPGTSFCCCDQSQKHSGDGEWTNYGPRRFDAEYAALYRKVSVDLESGGL	hypothetical protein CCM_09629 [Cordyceps militaris CM01]
EGX87689.1	MSLAKVKQSLAFCANAKGPRPSVSLSACARRQLYFQVPPLRFQSANKPQVIASTNGSNNSHCFTKQLNSTDTLDYNNADLVTGRLDGSRPPRQPSRDKPRPTTRAERSMMGSFLWEKATPTTRSALASAFTLRWLLLRQFSSEVPRRMSY	hypothetical protein CCM_09650 [Cordyceps militaris CM01]
EGX87730.1	MYHNHCHMETLFPVLERAGRRKLAHGMTSSLANLETARRRGARLHVQHPPRAVTQYYCRYQVAQSRPGSVLESIVFPTKHLPGLLRVSRCWCDGQRPDERRRAEGRSLCTWPPISCRRAGAGHPVLRHGTRQGHSLSLPASRTAAGARIGRFVLAVYVFGLSCPRRIPSTSFFTRLVLCFCCAGAGGGASSILFTVSCARRPEPRPSACCRLVGGDDASAGRNPLRRCGYSLAQQSCIMCGLSEGSDWEVVFWLLRLDLEQAVGVGVSSYGCELIYRVALGRLGGPPLSQPDAVIFTCLGPSNRVYQSTTAADIYNSLATDHHEDKTEPEVDGEFK	hypothetical protein CCM_09352 [Cordyceps militaris CM01]
EGX87748.1	MQVPGEAPGRDKRGGCRPNANDASGWPNGWAKGQFFDLLGFSVVGEVECQVFSVSRLSSLISCLVFRLPSLDILRALPWPGRLSQLLLCRDYDNASHWGTKARSLSATRTAGSAPSLASSLDMSTPDLPNPRNTPSCPHCRTSRKKENRLAKRRDPLVPGPGGSAFCRRIQKRGRRSSADKKRRLSTRIIVTGIFCSATRSRMMMESNQKDERAEQERKETEGDRIGRPSTFKLQKRTAVVVVLSLSRTQSQWRLMVAFMAAGGWRHPLPPFHQTTSSEYHLGPVHRLLYRRRREKKNTTIISSRIHSAAFIQSPLFQRTMTIHLSLLGSLVPPKSFLALLFSQLLSSRTTGAPLSRRSDSASPNMQVRWLSLLVPSQFAALPCPLFTQPSPAMPSLRL…	hypothetical protein CCM_09370 [Cordyceps militaris CM01]
EGX87823.1	MFGAHAVPRRLRRCHLEDGVANEQTRGSYGYSGQDRRRPGWFAALLRRHQQPNDQSPPRALRHPGLSRTFSILDSHTSNVSVTLTIANCVNDLSCLSYAVGLPASQPKKKPMMLFLGGSRNRRANVDLQAHTHTTTRQQSIGAEPGCASQNQRHWWATLLFLKHRLAAPKPLSISQNVAREGEESCDLYPLFPSGIRVDAPLQEKKVGAEWLVNELFRCLACHESDTCDSNLNVMMNLALEKIFLCCTLRVTQASPFIYMHLCHPLDATAKSPIACPGKCSPVLAGFRGIVGRKKGTRRFGPSAIYSAVWI	hypothetical protein CCM_09445 [Cordyceps militaris CM01]
EGX87873.1	MIKLYTWLALLYSTVALQQGDGVSQAAVRDAGSKDHSSTTDATKTKKEKLIESVSTGFGPFLNTKGSRIEKSWTSKVYGWAEKDMIFSNTETRKSATMVRADIKNCNVTVSDPIALAPGIYCSPGFPVCSLSYTLTESGMFGIKNTVKIGASAKTTLQAGIPLIVDGKVEVGVTLDLTHERHTQNESSTGQTYRFDLKENESCVPSKVQLLLRCHSWPGKYHLQFDVPVTDTSRHGSALYKCRMYDAEEGLLKSPTGEGTWEVLVEDRETEYGKVFTGKAEDVLSKSIIKKWHDEYSKADSPSIHWLPKHNRIILCEPELVDKPDTVDIPLRGPDNLPLGHIGCVIEQWHSSPPLAEGNIKRNWNTAGENA	hypothetical protein CCM_09496 [Cordyceps militaris CM01]
EGX88076.1	MVSGQTLQWFGLFLGLLLLPALIFPSSGDPMQRPDRKHWAGVGATRGDDQDWVFRGSGVGELCSSIHVCRVMWVQHAGGW	hypothetical protein CCM_09212 [Cordyceps militaris CM01]
EGX88133.1	MSAGALLLLATEPLARADVLAAATTTIRTRSREMRNFVSVSNVVDDQARARLFWGSLKVELCCFGVRIRR	hypothetical protein CCM_09269 [Cordyceps militaris CM01]
EGX88149.1	MSASNHVGPSLACGLQNRAAPNTGADPRRSLNNSECMAGEILIPESCYTCPFSTFIASEQKFSQILFAWQDKQAVAKRHQPARIFTAGKQKFLRLANRGVAMLVKKCGNSKERPDALSHATPQNVLQRAGQTTLSDFLYLGRFSPMSPSSILFSNRNRASLQT	hypothetical protein CCM_09285 [Cordyceps militaris CM01]
EGX88269.1	MGSIHSSIISITFPKSKKDHVEKFQWRSPRCRGAPLWTSHLGIRMRSLQPSCHARHPCGLALGGQDTSRSNRRDLEIWFSGTGIPETFGRAAETRVPPPS	hypothetical protein CCM_08312 [Cordyceps militaris CM01]
EGX88290.1	MIGLAVLLDEVLVLLDEVDIARAVPNLARLFHDFAPAAVLQDILGLLVDEALQQLHGPLVEGSKFRSGSIPVVVPPDEDFERLQGLWPVFVPLRLGDDAAQFLFHGLSVLRAAVVGRERGLLGFHASHVLKHVHASVSGHGGCVAEIVSRVLVSETSALIDQCRSSLAASLGIGDKSADRSMSEFFGCE	hypothetical protein CCM_08333 [Cordyceps militaris CM01]
EGX88305.1	MKRPTDTPLATSIMPYPKSRQRIIGIHDARVVDGAVLNPLRVLQARNDGTRPDDTMVKMPGIMGLAGAVGGGGRRGAVGGLTIINSDLLLQRSSS	hypothetical protein CCM_08348 [Cordyceps militaris CM01]
EGX88330.1	MSLRSVMGEQVVELAAFIPLGVRAKVASGRLNDPERGQGCLLCRKNKYQLKRTEKSSSYAQRPTRPKLTGRLATHRRIRNLDKDQRANTDLRGEEKEKLAATADPETAEETFRLDEGSQSLNSALPTLNSALPTGLFAVG	hypothetical protein CCM_08373 [Cordyceps militaris CM01]
EGX88331.1	MSYKARASYEAIAATRQSSSAVPIGPSVMVDITISGFKKATFRIENLVWRRVDSSRLQYSRKWLGLVLPSNGMDNRQ	hypothetical protein CCM_08374 [Cordyceps militaris CM01]
EGX88337.1	MTDHDSLLSSRVIFESLTSISLPLGAKTPDGCADGSKHSRPSGRARPSLVIRTASQQAPVLPWSGSRHYPSAVSWTSH	hypothetical protein CCM_08380 [Cordyceps militaris CM01]
EGX88342.1	MTKLLMKQQAPRQRLVKLQHAIDTIGKADRKCICIAHHLSLFLWAAIVYIFREARRGAEVDVQVAPHRLPRTNQPPRVSPGYDVTIFHFARSLSIEAKLTSWGCWAAKAKEAKRLSPAAAAARTSKW	hypothetical protein CCM_08385 [Cordyceps militaris CM01]
EGX88344.1	MRDPSCQRGSIIDEKGSFEREWARATKGSLRRGALHPANSDWAPAEAVSHAPQRDTTAGLCGVPWPCLDAMIQPTDAGVDAAGGQAKIQGTPNSRDVDGTMDSGQVCLPLIAPPLIFITMSLLWAARGTALQITLLFFASLRRAFSFTGSYGSSLTPRSLLASLSGSKHISMRPTKRLPTGATTRGRLKCQTGPISSAGCYEQQRVISDQSPQTAGFQRTLRLARFWNSLDASVTDPSSWLTRCVAIVMQAVPNGRLPSDAGGCFPVTSTLGVTPVTIQSLILTKMATTASLGLAIIATPDSTSGENRPQRLLTPASLDSPCQETQTISSTNSGSLIGITITNSGAFNGQKAVG	hypothetical protein CCM_08387 [Cordyceps militaris CM01]
EGX88357.1	MTTLTYSLPPPSRGIGVQLRMPGGNSMPGQGRCLALQGRQIIRWRRRLMALGLDAAGASSFL	hypothetical protein CCM_08400 [Cordyceps militaris CM01]
EGX88358.1	MRMNPLPRLLFIDKATTGFIGIVERSRSQPVTSDAALCGARASPPAFARCRHIPAPHRLRAINPACEPPDSPRSCQAFWFLLLFFKLYSSRSDNVVVASKLGTISLKRESKEPQLRKQLAYAALPLQDSLRASSSTSGDLKSATHGGVQEWAKATLSWS	hypothetical protein CCM_08401 [Cordyceps militaris CM01]
EGX88359.1	MDSYWVVFKLALLDHQSRASLLKEPTNAPSSPDHCSATSKGQEGRNARRRLELA	hypothetical protein CCM_08402 [Cordyceps militaris CM01]
EGX88362.1	MRAMSVQFQVPAGLKRPSGATAKNSGCGAVVPPGTSSNWGGRSAGATHPPQGQGTGLA	hypothetical protein CCM_08405 [Cordyceps militaris CM01]
EGX88363.1	MKDETMERDYRAVDMYLPINTCYGRVPPLKSAEQGPRIRLDRDRWLAGCWAQDREAR	hypothetical protein CCM_08406 [Cordyceps militaris CM01]
EGX88372.1	MLSFGPRDKCKSEIGSRIKMKHAATSTHKPVAPKALSWPAPVCPGRALFCCSTNYSELQRTPQLFSRSAVRFYCGGHSIPPSEALLVVTNNRVAPSFTNIIPQARALRTSRSSARQTARIGFPSQTTGATALTATLAAPTTWSALMELI	hypothetical protein CCM_08415 [Cordyceps militaris CM01]
EGX88373.1	MALHQRSRGAWHHWAPSKKRPVLAKIFNHSPDNADKGLLAPNVEGGRETAEGEAWVTCVS	hypothetical protein CCM_08416 [Cordyceps militaris CM01]
EGX88375.1	MAGKQTLANKSWSARNSKFHKLSTIVCSPARLALFPLLIISFSIPGQTRSRDTPPPSSFSRCAVQQQLVDLSPIRALIASANSPAL	hypothetical protein CCM_08418 [Cordyceps militaris CM01]
EGX88376.1	MNFTLRVPISYQELASTAPLVTPPWLLAYDPSMQIHVAVLSSSPTSKNCNSALGHDGHGKVTQNILSNPGPATRARTRRPRAPIGHCHIPKRAGNELIRTISVPGIAKVGSMGHVLAARVLNLHSVSLRRARRDIGSFIGGLTD	hypothetical protein CCM_08419 [Cordyceps militaris CM01]
EGX88377.1	MKTSSGMERQLPAHITSATTAQANVATEETPPSEIPLRTVHINSIDTVRIALSASFISASIYSISLMRLAFF	hypothetical protein CCM_08420 [Cordyceps militaris CM01]
EGX88383.1	MSVNSQAVQVWGHRIVGSHCYSGLTLLLILTQLASKTPEKVKQRGRSSITSKPTHSIHVSSTPLGAKRYVRVVRPEPVLWGLW	hypothetical protein CCM_08426 [Cordyceps militaris CM01]
EGX88391.1	MQQMFLPRGLGTWGRFSSGNTRVAAKLDEFAPSYLLEQPDCHHGLGDQGTAVALAIHVDSDSLVTADR	hypothetical protein CCM_08434 [Cordyceps militaris CM01]
EGX88395.1	MAILLGQFVGSRKRENTQVPFDVVTTSSFWFLYAGSLRLGLSLPKNQSSTLPNAVAPSPSISSIRARGVRLIGAAENSIWRAGLAGVVAKSIAILLRIFSRNENVGQAIYPVSFVYSLNLEKRVTLPVSWLGRAPAPGLLAGI	hypothetical protein CCM_08438 [Cordyceps militaris CM01]
EGX88399.1	MYSFASVVSNPFFDTTAGQREETSLFLTQSYVVFYLACLFGAMRQSCSRGAIIIKQEQGVRNRDQFNAHLASDAEFAKTMTMRTGQPRTRFWSLPGQSPPALSAASHPDPTLWLVRSTPLWFSPLALDSTLGSDPLERAFHELPSEQLR	hypothetical protein CCM_08443 [Cordyceps militaris CM01]
EGX88401.1	MQVSTILSYQLTQIAKPKKLLWYLANPMNKKGQQVAHIAVKSTHTKHRYLRRADHELQLHWAHQPLHFPL	hypothetical protein CCM_08445 [Cordyceps militaris CM01]
EGX88406.1	MALGAANSRPRRSVQAFRFRVANFHSSQQPGSWSEMAPVNSRQQHNTTHRPAADSPASAVGSAAQKDSKVRRTCRDNPATLELQTAACPIRIRPSVSRASRSGIRILPCYGVLTLE	hypothetical protein CCM_08450 [Cordyceps militaris CM01]
EGX88421.1	MTVFLPTRLLRPNESRDVGDSLVSSLVQKAANRVGGKAVTCKSTNSHPVHPYKNAFGASRWLGFLKATLASTILFDNNEESYCNKKRLQPCSMLSLSLAL	hypothetical protein CCM_08465 [Cordyceps militaris CM01]
EGX88433.1	MDQDQLNDMALRCPQSSRYRVPDEHKFSCPECSGEFENIIKLFNHIQRGVACKQALGREDPRGKVLLFLESSIVRHK	hypothetical protein CCM_08477 [Cordyceps militaris CM01]
EGX88440.1	MPSIAGRINDNVRLASALETRLAARTSKESIRRGANGVFAKLKNPWAVALARLYHGMARNMTR	hypothetical protein CCM_08484 [Cordyceps militaris CM01]
EGX88442.1	MLFVLVLTLLDMHSGPLGIKCGTPPSEQLPSLEQGISLKYMQSQKREKSHRVAAHSRKQKQPLLFLSAISVCHRRSPFRLPRKAFGRRYSCT	hypothetical protein CCM_08486 [Cordyceps militaris CM01]
EGX88446.1	MLGRDICSISSRTFWQRTESGKFASPLKPPFHNGKSACRILIPTHSSIHSLNNIDNGNAT	hypothetical protein CCM_08490 [Cordyceps militaris CM01]
EGX88509.1	MRRLCWVLPRWAASNYCRSFKPTSGEFNVTIAAPIWEATNQAIHNMLPGNFPVYTVNATGGKHVAAGFDSARVNNNQRGINNPGLYLGYRRARSSTGTSQDRGNNETKIKGLFRPTTPTELSVSELVNFWLDNSGYYEGIAQMKKQLTDKLSHKDTAPARPWAGPWQADWRNDGFGEDSYGFLLSAKQKYDPDSVFWYWRCVGNDAWAEAWAQETGGALYRLSTETGLPCGRDKIRPDRDRSTAAVILLLVSENLRSLNPFLCCLGATVLSFYRAGDFDPLGRKGGRKVRSLKQQGSPPSIPVSGPHPG	hypothetical protein CCM_08553 [Cordyceps militaris CM01]
EGX88511.1	MNQKWTQAARRFGYSPKARHRFVALQSTNSNWEESVTKAKTKSRFSVVQRPGASGLCYYSSDEETVTTKSAASGQRVRRASLADGQGQPATGRAVARIGQFFVEGDGALQEARFWLLFFRASDITSSLGSTRDATIYPSLYNLGPLGAWRAQVAVVLSWDAITIAASIFAKTTQVPTTPA	hypothetical protein CCM_08555 [Cordyceps militaris CM01]
EGX88552.1	MADANVLAPVLSCRFGNLAVYANPLRQMKVSLLLQRGARRMCIPPAGATFPMPTRLTQLGRLA	hypothetical protein CCM_08597 [Cordyceps militaris CM01]
EGX88569.1	MINKDVARVKAANFNSSPFTMSKHNNDCPFLHCNMAENILYNVWWRVTDMGNYTIQLQPVQPSKERSGKLLQLIEHPTRWVCYKGYDSTKMPEFMGKGVSRGYMRAFGADKSNNVEKLWMCCWKNDRLRGRAWVDRVLRDLGTELMDDGLHAVV	hypothetical protein CCM_08614 [Cordyceps militaris CM01]
EGX88626.1	MVTSLRNVLQPDSKAYNIVVRNNDDKTVDFSAPFGLASISVGRWIGRGAGCTEVTITNMKGNVATVQVEDSNWNMIITGTIAGGVKKFKVGGDRDFNIALTPDGHLRFQCLDGNTWSDGGESVIDVTLLPFQKK	hypothetical protein CCM_08671 [Cordyceps militaris CM01]
EGX88697.1	MAPDEPESRPFALTISSTTPAAVAKQSIPSLASLSTLLLSPQTCVLLLHQQSKKQK	hypothetical protein CCM_08743 [Cordyceps militaris CM01]
EGX88766.1	MTSVYSDLAELAPSIGGCVRLQARLSYITESNSAPHTVLRTPRRTSYCFSTFLDGTVTTPVCRFPPSTDDFHAAIRASATTQAGFPKSGPVPTSISNYTLGSDLLYI	hypothetical protein CCM_08812 [Cordyceps militaris CM01]
EGX88792.1	MPWLVELVWEGSVTLAMLGMHKRKRLAGMAAAARVAWCGSSKDRWCVCTKWERERNVEGRVCGRTGTVLGRDGLKDEDAQQEQTDRLAPSWHRGAEGGKSFAVNTQSRAKEPTDRSLAMRRRNKVSAPVGTWLGEGTQLAGSLDQKRQETKRRGKSEENAGPGKNSKKKVEARRRLNWREPGFRE	hypothetical protein CCM_08838 [Cordyceps militaris CM01]
EGX88817.1	MSATDNIPVHENSYQSRRAPSYHHLDTTILSLFVHTSTYMAESVPGGSVLHLGRAILPVRRGLTKPPCSRSFSPLSPPRYGDWPIVYVPVIPIIVTF	hypothetical protein CCM_08863 [Cordyceps militaris CM01]
EGX88903.1	MYPIPHTKGLFSLSHPVSRQDPKRRQNMKKSKVLRNLAANVVPMHASQQADYLLLAFYMLV	hypothetical protein CCM_08950 [Cordyceps militaris CM01]
EGX88924.1	MEASQENKLRRRLGKQAIAFAGVLELNPRHSKGLPQTEPSVVRILGLVAANGGASAGSLVLAATLCVGAEELMTLAHSWDRPSAETVPQGVNGNGSMACFKRVEMLCGGISSANHWLDLPFRPSFRLDGFTILAIWVPGSLGSKPGRKRETPLASCQWTRDWLQE	hypothetical protein CCM_08971 [Cordyceps militaris CM01]
EGX88956.1	MLRLSLGSEEPRPTIQISSLNTHSCPFDWSKDRSSITPPFQSLLGAEVHIDEETWTEFSVSRQASEDLVFCLASPRAEQSGYSTQAFYVFKI	hypothetical protein CCM_09003 [Cordyceps militaris CM01]
EGX88969.1	MRGPTSTGTSGVPLTFKVAASSVRFEPCSTAFQLPEGSREALSIHEAYNSLAKAISASRVGSESVRHRLADIAQRLAERHALAVRCNDGPMDLPPVDMASTSAQVGDAEPQAQEFVSADDCDRELRGLWNAFSQSPNVDWADWVVSCTDPDRQWPARADAKTVQAMVHRPRDHRSRRCVNVIVDAAASGIRNSAVSYALLLRGELVRSAEEWRMSGDARAYVTQAYNHAMHYYFIRYQGARQILGVDPVVSDAFAISDMLLAPVLDRGRRVHSSGYVSRLCPTFSPDKEPPQFGECVAWLYELAAILGSEGITDRAIALADQLYRSFACLAHQGYDWVAWGTAYDSRVHGVAEEPTTPQMPPTFVCLECGGGKGDGFVRPAWCSSHLV	hypothetical protein CCM_09016 [Cordyceps militaris CM01]
EGX88974.1	MSFSAPAHPPGLRTGASRKSGHRKWAAAITGASPRVRLRTNYREVLMVEFGEEEPKLAQDSSGERRAADLTLDASRPSLSDIGSDMDNLSLSTGGEWGCGQPISIM	hypothetical protein CCM_09021 [Cordyceps militaris CM01]
EGX89016.1	MQPSAQFADGLGFSHLLLSAGRRHWPRGDFASHRLSSLLSFPTSIFLPILCAFFSSSSSITDSKHNRIPTTCAATTPTANP	hypothetical protein CCM_09064 [Cordyceps militaris CM01]
EGX89053.1	MLTSSTRLSVDKNNFKPGCSPFMRKPTNPAQFIRAPTETAWLPPGSLLTLRYQSHSELRTACRGPLAEGCLLLATTRAKGSCTVGERGLDAELGNGPGGRSNSKPLL	hypothetical protein CCM_07305 [Cordyceps militaris CM01]
EGX89185.1	MFNNCNPAVWHVPVCSGPAPTDFASEIWGTAQPDPNPHTVTRKYLIRGGTNSVACNRGNNEEENPDCVETCASSIRVGLFKNPGVEQDGRDAVRMPSFGKMQDEPAPRCGYRQTR	hypothetical protein CCM_07437 [Cordyceps militaris CM01]
EGX89263.1	MLHEGFIFGQLIEKAQMASIVASTGEDRQTALNPAKRSKNTYTDHVERMM	hypothetical protein CCM_07515 [Cordyceps militaris CM01]
EGX89279.1	MQPVSHGATPSVVQPPPAFAQVPRYLRADYLLLPVGNRRVGIMLCPSNDTNIAMQTLLLQPLNLSRSTNVDPTK	hypothetical protein CCM_07531 [Cordyceps militaris CM01]
EGX89280.1	MPSFKPRHLQLHHIVSDVIQAAAFPHTGSHPGSRGRIRRYPQRCIVALLDPIKMSLIIRLVACPSRRNPSDTTGIAG	hypothetical protein CCM_07532 [Cordyceps militaris CM01]
EGX89281.1	MSRRVILRIRNLYSARIIRTSRTKQVGGGLGAPCYRKTTPSKSGESKGISTLAEDVSKLESKKDNASGNFQGGQGVTALVLTPGTLASRRPGLPG	hypothetical protein CCM_07533 [Cordyceps militaris CM01]
EGX89282.1	MAQARLVAFEQPAGSKQYMYVSVTRYYPHRVFQSSYLKLSKFDVLARSLGKAQCPSLVMHPRSAA	hypothetical protein CCM_07534 [Cordyceps militaris CM01]
EGX89285.1	MHVRVASASPGPGAIQIGQMPQAKWLRHRQFFLASSQVVGNTPLTAPNMDGGSIGDVSFFGPQRHKGYVKEGGSCRALPEEHGRAW	hypothetical protein CCM_07537 [Cordyceps militaris CM01]
EGX89311.1	MLTAKPFVSPEFSPVSTDYKQHRERCAALLVSWHRFAGTQTPAKRLLTSYFSIISSSHDSRANHNGRVVQFHGYPLVASPSVHSQSRLDHTGSCLFANAPVVPCHSAQTVGRLRVAIKPVGIVSFRCCTCPAEWDMVL	hypothetical protein CCM_07562 [Cordyceps militaris CM01]
EGX89343.1	MFNAAPFVRYQRGIDCTKLMNRLGMRSTTKVVDGRSFVPGMALFRDSNLVNPAARERGYPSILDWEYPLFDAQGNTVQRLHPKPSMLLDGREESSTSPRT	hypothetical protein CCM_07594 [Cordyceps militaris CM01]
EGX89385.1	MAFCVLEALIVVVYFQRRQATGTTPQQPPSARCHYPQRPETLRDGLAAKLDFISTQVQIA	hypothetical protein CCM_07636 [Cordyceps militaris CM01]
EGX89502.1	MTAELDFSPSGGWPQRLEDVGYGTEDVGYGTEDYGQDPETTCHNGSPWTYRKEPADVFLCKPARYELVVCETRILQGILQWLDLP	hypothetical protein CCM_07754 [Cordyceps militaris CM01]
EGX89509.1	MNKTEWARISACRVPAPRLQDSKTPRLYILIARLSYMQCSAGRRRVVPGIIESQLGVTLKALRPQSGKENISCIRPCCALSLIARVGELVIPGCAQFLNFGGYQNRPHVDKPSNAICGKISAALHQVSLSGNLSVARRMLATCDVGAESHVHRLYCKPRRHRGMPDRVVADSVIKSTPNTKSRSLRPPGKTNISCCRGLDATMAHPCPDWTRCTEEARRGSAMAPTPGLFHSHDLAPRVLRAPLARGQNEGVA	hypothetical protein CCM_07761 [Cordyceps militaris CM01]
EGX89595.1	MPLYKQTAEAVHGKPKQAWSIDPNFLSGTRRQCSSLVCLVSSVGGFGNKKTSKIKKDRKN	hypothetical protein CCM_07847 [Cordyceps militaris CM01]
EGX89653.1	MEAYGGGVWAGQGRSTNFFFHGRAWALAGNGSLMTKTHHIVSASAPPLQLPPVAAAALIDQLAQRGRLGRVAPGTPIEAAERPRNIAPVSQSYVVENARHEKDDTQIVLSAQSKRLRGEPGCAALQHAQTDRYRIRCYKHVVGPKGSQKYGHGLTPADHCYQLPMQRLQDARNTTTQDTSHHRFFPTCEAKDASFRQSAPYIRTGHTLPHLSLNRKGHHRHKTHRLSARHHGPIDLPGSLGLGSSTLTRQRRHRLTCWGQPGPTGVDNPAIQCSAIPGSERTSDFPWPLSPPQDFLPAPPTEKKEASIPPSRSNEAES	hypothetical protein CCM_07905 [Cordyceps militaris CM01]
EGX89668.1	MLLSPVKGRLHDGQAAGRGDGKLSAESSLVRHGSWLCCIADASSNHRVQSNKFDSPPSYVLVAESDECPPRAHPASLLGEATGHPAKVPQDWLQSNTDLDVSGFRQPHTSTNVTLREQTRDKTLMGVQLIHIISPASTYQHRVQGQPDEESDSVPHQRTSGVSKCSWTGYLYTHIRCAKIDQIFDKTLSV	hypothetical protein CCM_07920 [Cordyceps militaris CM01]
EGX89711.1	MDQAAQSLVIRIRNYPRIDLLSAHQHRAGHSLRGPAADRRDTEAFDEWASRAASNRSPPDFRSPKMEARLPDQPALQ	hypothetical protein CCM_07963 [Cordyceps militaris CM01]
EGX89754.1	MTITEKLADLCNININPCSSTSSHRACGCITRGIPGASFCALVATARIAASYSANRSSTASWCRIRARARLHAPVKASVAPMPDKGDAQYLSSAPVIASCRADFPGWPSYPASPGEDHAAGAPGVHLDLHQRVVVKVLGVGHAAHEKQSRVRVVHDGHEDGATLAEVVGSEHDGPAARGVKPFAPLCVVHLPWDAEKGTVHAEAVYCFLLLLDAPDESSRLALGAVYADDDVTSCTPSSPVVAARTAASKPSLRGHQCSGRMVEARTPTPGL	hypothetical protein CCM_08007 [Cordyceps militaris CM01]
EGX89785.1	MTGKFVMFSAPRQLTLNPYRPLSVIDANQAAAKAKRFGGTGTEVYMQGLATCLAKASLGCLPTARPDSRTACAFFISGDMRLGAYGRRPASSLNLSHDAAPSVKSPGNELRTQCVDALLCLPRHKAFALRTGAELQTWSHHLANQRPGAQPRKPEWQTLRLSILHLEVFDKLGHVSEDLRSVAAHRAWSLRRRLCATSSGQTVAWKRVVPLAPTPLSPARPSIHDKGTKLLHVAQLAQCDPRGMNYRIFLGSGGSAANLSVPVNRMPIAAHPPATWRAWRSQHLADVEKPRNISDISTQIASYMRGSPSSGLRSEIETQPTPEAGPDRRDCVSSETLSRGRGAHVIYTGDGVARFGPAPRSLVMARLHPCSAGMRPFN	hypothetical protein CCM_08038 [Cordyceps militaris CM01]
EGX89978.1	MPAFHRPHQLFPQHRDPKIHVSLDRARRRRPRQRNMARSRTAQPRPRIGSRSLQYVSPARGRVLHRALRQHEPACPSAVRSRRRVVVAEHRLPALNPAREVANLGVAQGRLRRGDVDGGAAAAAATLQLLETAAEGVYLEGRRGGGGACHGGLVRRRRAAEVVDAVDGRVPAAVVGRRHVQVAEGLLGVEGLGAAAEAAAQQVEAQPDDGGEQGHADDAGDEDDGVLLRQQHLGQLRRVVWTRMMDYTRCGNNVAEAVEVGNNVALPASSSASFHAFVLGYSLRPADCAGFGGCIALPATGYFLKFPFLELDDSTLAQARALTGSGGPEWGRLEQRSAAYGIRERKESARQLTRLRPYDGRGVAQECGSLALDQCSCLFFATTPIAYPPPPLTGMLSPV…	hypothetical protein CCM_08232 [Cordyceps militaris CM01]
EGX89994.1	MGSGAGSQFVNAMPDLNLEPPAVKNFRSSTTGSWTLTKLPSVCKEYDPYLTRVTYNNLLFRVTLHWKKRAGQHSNAKASNMPSCFNTPYSKRSVLVIIYVVRFGLPHAESRRRSTAVWPAPIHRDASLASGAEAFATPTHFPSFPLPLLQQPAREAFARAWGTLPCMPDFRGLRDEAKPKSVARRSIVALLAEAEEGGKLAKPSAHLLVN	hypothetical protein CCM_06414 [Cordyceps militaris CM01]
EGX90017.1	MAGLGINALPMRSEAEPCFQAVTSRQRGPRPGSESKAIGVAVLLPLVGRNMTRSGIRCAVKQVLKKPTSMIVAAAENAAGVTRGSSLADRHSRIVTAAVTPWMEYSLMKLAHILKKKSG	hypothetical protein CCM_06437 [Cordyceps militaris CM01]
EGX90047.1	MAASVAATAATAATAPRKNVTRAGVGMRRETERKRKRNGSWWGYAGRVEAMFLVDATGADNRSWPALGVPRCLAGRVIAFRKPWTCNHRQARRSKVEILSSFSCFWLVIEPERRNTTSDNCKLRRDCSRISSCFGYIKFPRRGRGWWWSVQWPPRPDQMPTARGGRQTAEAFEFCSPSKPRQIIRLIRGSERARGGGPKRFSAEVGARLICISQSNYQSCSQSVGSKKETLGQGLSENGGLFVCDYLIAIRKHMSNKVAGCIVYHNAVWFGCFATRRGGAYPALAEIEGAWFFKLARINERMQQLSGGSGEAPWHDSTSEEDNVELADTGKDAPAHVAGDKVEKLSS	hypothetical protein CCM_06467 [Cordyceps militaris CM01]
EGX90072.1	MPISSLRRCTKLGDFAWPSKIAARALWRCVFASSGADTAPSHDEHHRPQHSLKNPSLGGNKTGQVGVKLVSQLSKPPLRGYAVIRQTALAASPSNSVPAPGEVMGRYHGSNHITTGGIITLWYCRGLHAARAGKHHVGQSSVTKALTTNYLPRLPGTGSPGWNQNSYGDLWYFEAIPQIDRQVEHYDEKTEYAMILCGVSKCGAGINFLLRGQNSRRAPDESCTPSTLKLTTCHSMRWYLVSWIAMRELQFGGDRNHLVIITPNLLNRQRLGLNNSILGQLHSTSVHQQRHTSSLASMFQLLSSRSSERGKTPDAILLLWSPGSHIYGETLLSGAGALALAIVDESEADIVEVGQY	hypothetical protein CCM_06492 [Cordyceps militaris CM01]
EGX90077.1	MQIIVFSFPKGCTSVGPETFLVLIFCLDSLLLFSTHQLHLSLATRSTILGLLPTFLCVGNWQPKLNLPSVQTSGKATPDCRC	hypothetical protein CCM_06497 [Cordyceps militaris CM01]
EGX90104.1	MDSIFSFSPFWTEDECIVDSESAIDSIRCHALRVSLEKNRGREEKLPCLQDVLEDVIYAIESLLWNPRDDNIIINRIVALGVEETIDPVLLVKEAIAHWYISAVPISTRDPHHGLPPDAEIEQEDGATILRWNRQYAAEKHEIANLGLIAMLLTSETWSRPESPTLRLGTLVANAATAILFGAFMIIPKISIRESSNLLVSVLKDNEAMRLYLRTTWQLAQDGASKYTHSPSAEFGTTTSEVKIDHAGKRLLSKVGQENWSVASLWHPSRKTPGSAWNKFMRNTQQPYFPCKKIKTEIRYRLPSSCLSLAEPWEIYYSELRSKFDQVRCLPPPYLSD	mating-type protein MAT 1-1-2 [Cordyceps militaris CM01]
EGX90123.1	MAVQDGKRFEREDSVYTDEADKVELRRSPEYSVGGIIGRDDAVGVTKLKEGLAILAGAKVVVLVDLGILGQLAVRLERAGLVGRVLEDDVALVVLEITQREEDDVALVDPDLFAHFTANLGMLVLERDECVCEPGGGASADLCRGAAMQRESHETEGGEYCRRRVHPGHRNIKNHLQDLGVLLTVLLEGEFSTLVIVFLGTTTAVLATLRVAESATMSLREPMAGAGKKRPPPRGLVFARAGYRILKSGCYTGVSVWKKTRGSQQALFVMMFFVCKEEWAGGQPFIICFPPSLTGCALCAAATR	hypothetical protein CCM_06542 [Cordyceps militaris CM01]
EGX90182.1	MGGQATCEQHDAETPELTTTSIPPDRELDGLELSPARCRADMAGWHREEASPSLGNSALLVDRAIWIVGRQGWSRDRATGVGSSAPPPRLDWSASARLGALWLNYWTAMENVMEWKGEEIRRKPRVSG	hypothetical protein CCM_06601 [Cordyceps militaris CM01]
EGX90219.1	MCGPSPAILRLLEMALDIAFDRRDRDSSKTFFTPATRPLPENCMTLQFLSTSGSRLASIRSVTSHDIAGATYTLGDTNRTVNDIDNIGHSLT	hypothetical protein CCM_06638 [Cordyceps militaris CM01]
EGX90263.1	MLGASFCAASGRRLPPDSCHTLVWLVPRWTGQVVPTYLLGTYVPTYYSSSININKVTIKYYSKNYSSI	hypothetical protein CCM_06682 [Cordyceps militaris CM01]
EGX90377.1	MCTSNCNTMELNGPDNKPDTSPMPKDRHRKQRSNPDRKPITHQMPVNQKSRPSPLVAGNTK	hypothetical protein CCM_06797 [Cordyceps militaris CM01]
EGX90380.1	MNCPAPCSHLHASHKAVVSFSHPPTRPPHRFIPRGNSNALPVLSFVLDLLRVPTPADPVSTEPPPTTNSIMHATSQY	hypothetical protein CCM_06800 [Cordyceps militaris CM01]
EGX90392.1	MTNQRACLAKLAARPRRHPEPVRILGLSSPLSADGTQYHGLAPDKPYSALDRTTALSHPLHAAAHAGYTTLSELTLRVALVAGAWPGLPADASRRIVSHPLPYRPMAGERGKKSQIVVTPASLLPSPMIPTHHDKQHHNKALGN	hypothetical protein CCM_06812 [Cordyceps militaris CM01]
EGX90396.1	MVPLRGLEWPMQSLGLFKAKRPTSGKDDWAAFALSRRTFDIAALGPMAKEHTSEPVVPSSPVMDTMRLSAKDAGCRRHLFCANGVKAVALPPVIHRTSGGEIGRTMNTRLRNEEECGRGYENAWQTEVLERWEQIHNLPIRFRLPRNLTSSEANRPTQKDFVLSCFWEGKRQGENRQKPTNNGARTVLLLVSGLVPAGILIVAMDRHGHRSDDQSAGDGVCGWPPTSKDKERSLLIRTRFSEEFGLDCLAWGRFGLPGDGLAVPEAFYWSNRASCSLPK	hypothetical protein CCM_06816 [Cordyceps militaris CM01]
EGX90452.1	MVPASGDTVIFSGQHRIAICQKLGSWRVAENLANAFNGNGRAASTVSTQEARGTGDTTAAGGIGSWHAAQDEAARAAMTLPSYNHTSELLPQLRGSRLHVVRLAIGVQPEDTMHVGCCIPNHQPSIIGSSAPHHGQTVSEAPRDAARDAGAYSNFNAGETV	hypothetical protein CCM_06872 [Cordyceps militaris CM01]
EGX90480.1	MAIALPMTFGRFAALLGNYRSYILLLLCVAVTVIKRTTSNYASESSLQSVTLDTRTISAHVLGPMCPWTLVSCFLPPAHGATHLASIGQFFAAPSRKSLCRGLQAVLGVLSIK	hypothetical protein CCM_06900 [Cordyceps militaris CM01]
EGX90524.1	MDAKRSIRLVRNWHARSRHPDQGHTPPCIAKGTPPSSPLGNKSSDGTAPEAAHLVDGGVDGSAMRSR	hypothetical protein CCM_06944 [Cordyceps militaris CM01]
EGX90541.1	MSIKLYSHSTMRVANETEAKTSLALKIGHATVHESSSPHNHPSGCTDRVSRPLWVIYRESRVDNGQSPHSTQQSSWRHGGSAVCFLGAQARLVPARVK	hypothetical protein CCM_06961 [Cordyceps militaris CM01]
EGX90571.1	MQSGILATGGACQVQSHGYQSLMVSSSSIYMYSSVKGGAYLLGGLVSHFWPRLVEQLSIFPILLIQLHPSPSLAAASNLINLVECFKCGHAATQQQDV	hypothetical protein CCM_06991 [Cordyceps militaris CM01]
EGX90586.1	MSHKNKRALTNHTKSPRPSSQGPRRLPERWRRRHGLVRHAHQIRGGGGHTLLNMGKKKNEEKKKSCGVAPDGLLQKEEQGNGGAAGCRTGVRDILAGSKP	hypothetical protein CCM_07006 [Cordyceps militaris CM01]
EGX90597.1	MCRRYALHDEASWAFFACLSFFLVSKSASRRPDIDLSAPYTGALSPREGPADASKS	hypothetical protein CCM_07017 [Cordyceps militaris CM01]
EGX90630.1	MFPCSHLAGEVRRCTGSESGEAHKVSQPGRYPSPATFAHGTASCPATNSFKTGSLSYFLEPDPRVTWSMFMFLDKTHYHRIVGLVISFFFYFRFAALGLFDTEASLYDHRGSVRVRVVRLRACGLAGLGLRGIDPHLY	hypothetical protein CCM_07050 [Cordyceps militaris CM01]
EGX90640.1	MLVGCKAGNACSRTYLVLSGLECDSAPIQATFARQCMHEPVASSDSRPPSRTPPPLTWSDPTPANIISAAKNNRQHLFNTAAIMQASNRLRTVFADGKQAMGMWQMIPGANVSRILASSGVDWIMVDCEHGNMDGKH	Pyruvate/Phosphoenolpyruvate kinase [Cordyceps militaris CM01]
EGX90646.1	MGLATKGIGQRLTGPRVVAGKAIRVHISKVAGQGRVTIDVAAGVMLRRRPIQRLCCGGLGKLMYLLIALFFVIKVSIVNIVGIVIIVVLASILSTFNPVLNFDASKAGAAASTCAGTAIFGGAGEDVSNSRADQPVAGLDATGACACACDCVFACACNAFADLDAIRSVAVDNGTEIARLRDDGGVSGRGSRPGSGGEAASEREQRELNGEHCIQLKR	hypothetical protein CCM_07066 [Cordyceps militaris CM01]
EGX90741.1	MGLYYDRGTEQKRQLNVGHASLKQRRTLFSDHVPYPQVLRGQCRWWVVAVELAVEGVGDTKELVHLLERQALSFGDEEVDKDAHEEAKAAKHEIHAVPGAAHGALHGEHGSSGNEVEEPLSGSGDGDVEGTQAGGGNFADEDPACRAPAELKRCRPQVNAGDGNVAKGGNGLTFDRGLHAAVDADDEEDDTLRAGGGDEAPPTAERIGDEEQEEGAADDLDDAIDAGGKQRRVGGVHAQIGKDSTQISGFLDMVAWWTYNGIDAGELLADHEHDGDEGAVAVAGDEEHFAKESLGRAAAGQAPLNLELVGHFLYLSLHVGVRGGQVSESRECRGGLFPVVLLGEPAGGFGREGHADDEENGRERLEGERDDILGGGGDVEKTAIIDPAREGDHDAKHVK…	hypothetical protein CCM_07161 [Cordyceps militaris CM01]
EGX90752.1	MAVAEAAVADDALGGFAALLGVAADLFGRHGSCLARVVVIDWVVQSLLGLHWSGYYSVDDGCGSVIGKQQRVKLLQREDLEEESWEEEKEKKKSWVEKWGGKKRREAARQTVADG	hypothetical protein CCM_07172 [Cordyceps militaris CM01]
EGX90785.1	MTAETATGATLRRAALAAASRFRPSSPSSMCSHIIGAVYSANLCAFLTDIRVHHHLAAAPPAWQ	hypothetical protein CCM_07205 [Cordyceps militaris CM01]
EGX90840.1	MAFKQPFPVELCIHGINESGAYTSCLGQASEGRHVGRALFWRCRHLEGQSDESSSGNGHGAGLEAESTSGRDHRDAGGDRGHDTGRVDSGGVAGGLGGGRDDTRRGRDGGDGSAGGGAGDGAATQRAVGEGGMALGDGDDLLGGRGDELSRGRVLRDGEGGKESDGSSEAHCDGLVVSSCWKATGNKFASAAI	hypothetical protein CCM_07260 [Cordyceps militaris CM01]
EGX90861.1	MSVSPSTSPLSPIHASASRLSSSRQQLARGWSREGRLTGRPVTPAPATGAIRRRRPVWTSAKLAGPVVNMIMSGTHALLRRLASACCYWWAEASLVRPHQRICQVVTRIGRRMLGGKNSRKKTLGNSVSRETVSYEIQRAGYGRRVPMTCPPDPKVKKSDSHDRTRCLLAWVQPRPNVGLCTPLLEHKTNGTHITALTLALRAAPVMATDGYNYCLLATHSLALEPSAYNPLLPARARIFNPQTASTRSDRYTIITGTLPVIDVILVWLWSCLLTTTNAPPPP	hypothetical protein CCM_07281 [Cordyceps militaris CM01]
EGX90919.1	MTKMFRHWGATSAARNRQTPPPPLLSDVYDAAIDAKAVRIEGSPTMSRISGYGVAEASHSLSFDPVRAALPYQSPPVTIPCRATAQLPNISAVLPKR	hypothetical protein CCM_05075 [Cordyceps militaris CM01]
EGX90936.1	MPMRPAMRKKEENCIAGENSRLRMVYSSQYGLVQLFFYFALGCYPSPGIIGQQVDNCFVSILCTSLAVRDLYQSGKSICPSRSAPPGRSSEQAGHSGADMRATCRISVLYIKVENDARQDGPASRGKGRTHQMGRRMPTTLRADSFEAGNIRQGANFIASRTFDNESNYGYGYIVIVALLCL	hypothetical protein CCM_05092 [Cordyceps militaris CM01]
EGX90994.1	MPGSQIRGIDSVLKGRSPPEPWSSVTTISARLEPRGGQPRFHNPVPTCGAHLGSSSHHQSSGIDGKPCQWGLGSSPTSKQCPQSCNVSLSMGQKDRAMGSAHLAHPLKYMYQTLLYDIHLAMNQFCREMRYAE	hypothetical protein CCM_05151 [Cordyceps militaris CM01]
EGX91044.1	MSLPPQHLQGFHLVDMAVSVRSTNYAYFVQITTQELCSLHVTYTPLPSFVQPPSRIDNLANTFRLSVYRTRPRKIDFQARVALSHTLLIKPPKPAAKHG	hypothetical protein CCM_05201 [Cordyceps militaris CM01]
EGX91045.1	MIHSILARRRRSTLNWAIGQHMFYLHPVVHAAAGPTRGVGSPLLPPSSSITRHTLRQRLDASSDILME	hypothetical protein CCM_05202 [Cordyceps militaris CM01]
EGX91193.1	MRMHAVRSGVGLVPAVTTQPGPGLGEAQRGSALGVGLCDKSRPEQMLHRGFKGRALSSIFGPRVWLQVCGRGWSTLYGHKAELQAQKRDRQSAFILQVLQ	hypothetical protein CCM_05351 [Cordyceps militaris CM01]
EGX91296.1	MAAQLLQLLLFHAQLSTTSANLTPNYMSTDATWLTIASMASPLLERLLLAHPPVRAHPDRGHLQAVSTLTGPPPWALHARQQASALKVKSVAVISQRLLAISLRCVTNFQVTVVRQDSLACSAPSL	hypothetical protein CCM_05454 [Cordyceps militaris CM01]
EGX91451.1	MLCVIPSRDDAAGRKLFTSLLTCYRKPNHLNAGARAVGQGLVADAQVQCQQKRRRRETRLQSASRQLVALPRDRDTKQCCEPTSSTQRPKIATDSPPDGCMWLSCDACPAFALSQIPVSGIAANPEVIVDCANRIARLHSSTVVAHRAEPWSEGGGYAILPPVCRSSSATGQESFAGRERIANRFLITCLSPSRRPTAGGGLYQNWDVL	hypothetical protein CCM_05609 [Cordyceps militaris CM01]
EGX91453.1	MCQTTVGRPNRYLACTASQDTNPSARLLLQALEHHTAQVAQQAPGLRENVRWGEISLRSSYPVVKHRDTYWELGEGGEPQGQKCEQRGGPRCDELALPARYTVKRDQTSCEPQGTSLGSEAATRQKYNPLAPLHSPTKVHPEKAKNGEFRLKGCLGLSSSLMARLRFEPPAA	hypothetical protein CCM_05611 [Cordyceps militaris CM01]
EGX91471.1	MDTGSRDRRSCFLGGAASQPDEQLAYPAPTATKPPTSAAIRAQGYRIHISGTAGSGKRPPGNAVDALTERPDPGRGHARPGSPGLQRNVLLLQGLETHVSYRKAFAAWTVAPSSDVTRDPLCERDAGVFFSCTTDGLPDSGRAGPGVVRGPDDGAGQERCDGRGAGSISAGTSPFCAPSAHISSPLCDELGKGFLTQHYLTMRKMKEKHNVCIAMIMVSDD	hypothetical protein CCM_05629 [Cordyceps militaris CM01]
EGX91602.1	MRPDQKWVGKRGSLHSKSAREGKQYGWDTLTRWLGITRRACQGHESRWLDRYGGEWGLVHTDSNSPKSTYHGPTQNTLRRVELHVTAYISLYKNLFATGH	hypothetical protein CCM_05760 [Cordyceps militaris CM01]
EGX91743.1	MTGDVRLRLSCALLFACLPLMSVQLGGLGQPAFAPNLHTGAAGAAGAAAARPPVAPRPHSRRPRPFRTRPRPFAPTDGFLAAPVPGPKSETKSRYRYKQRKKNPNTHLHSSFSTTTPCFFVEQFPSHHRPCILFHNGADTTSCADTLVRTAPPLYLAIPATSNNCAISLFRTVNASIDSPLRYLAKPGESSPCYHPSALLALLVPNGVQRPVVNDREMQFTNEFRGQLNEVPSGCACRPQTLD	hypothetical protein CCM_05901 [Cordyceps militaris CM01]
EGX91762.1	MASFFNIADRVPHPGQNKKHCLRHVYNNAPVTHRGPATLRPSRHTARDPTHTARSLPLIVLYRGIKCLEGINYYKLFRVLLKVATKLSILGEDRLFILEGYKAIKV	hypothetical protein CCM_05919 [Cordyceps militaris CM01]
EGX91771.1	MWKLCASNKADENATKPAKQEQKEKKKDGQLCVSVRSPTGGPDLRTQRVRKGGTGDCVQPGAKARHCLLASSFSLAVRDANLQFPCPPTLCVTQKKIELRSLGLAPLLSQNRLALLVITAQTVVVLALFSLSWDRILPTQNGCNSPDTETGRVLTATRHFSFAKAHCVLS	hypothetical protein CCM_05928 [Cordyceps militaris CM01]
EGX91772.1	MPRIGIGTFVRDGRGDCAELMSSLEVSGPDASSIYGAFFPLLSCKTTGSPEN	hypothetical protein CCM_05929 [Cordyceps militaris CM01]
EGX91780.1	MHGLVGLWAIPPSCSDRYMNVALGIFKKGVPLISNAQLFILNFLILEIVVVSYYNKSATLNGNSVVSK	hypothetical protein CCM_05937 [Cordyceps militaris CM01]
EGX91808.1	MFEIGPVAGWGLVSDRPSYYGRVVDHFPINALSGLTAQAARKRMLQRRKGD	hypothetical protein CCM_05965 [Cordyceps militaris CM01]
EGX91811.1	MPYFPSCEATLGGVNGVNWTAARSDGKKSWGPAGGPPLQSLVYLLTFEQDPYYLILEMHWIGGFYYWRILRSKGQNSDERKHRQSLHNPQVGYAVAVLLSLFQEFGCRVPPVGGDDKVQDCWSAATASNTHDTLKSTTIVIHDMSDSLHTTAMQRNTDRTLLSPAPLSWSTTQYNHTWAAYSLNGMSGNATVPIESGNDLWREWLALLLRPQLKPTRRYCIVASL	hypothetical protein CCM_05968 [Cordyceps militaris CM01]
EGX91823.1	MTIDDFDPSSSSNRGPFHLDSSATISLTPHSVTPSPTDIPRGNKPILLAWHRQYAAARYSKGPRWRDRLAPALQHAVPVVIGQSMTAAEFGSDACLVWLETPPVDQPPQFSFDQPRTKGQA	hypothetical protein CCM_05980 [Cordyceps militaris CM01]
EGX91834.1	MASEVVGTDRRGDHLGRALVKTILQQWVEEHAVVDSRRHDVNRFISGEVADGQNGHCWNPDRAPGGHQTLDWYESIASGQFACVLDCSGVAL	hypothetical protein CCM_05991 [Cordyceps militaris CM01]
EGX91912.1	MHVDHFWRGTGKVASSPASPPQTSPMRRLGRLTSVKRFERMSGTGIICKHAQVPLGSRVAFGQPKPILWRMESTSVPCDTASWLCSGGYLQTLLGLAGLT	hypothetical protein CCM_06072 [Cordyceps militaris CM01]
EGX91942.1	MASMSRFSGDEARAHCPRKPISEAGRFFASSRLRVANSWWVCSKLGAEGGSLKMACPFESLGKLSSTCSRGYMEEQCRQGIEAAHEVAQAMDTKVKSWSNVIVG	hypothetical protein CCM_06102 [Cordyceps militaris CM01]
EGX91961.1	MISTWPLQSWPRAQVVGSQLGRIEPFKLNNSSSNPPVPRCAVARSLFQTSFTMHDSSDYNYATPISGSQRGMSPLAMSFANSKNALQVTGQKRVEM	hypothetical protein CCM_06121 [Cordyceps militaris CM01]
EGX91974.1	MAAPQLHNRSPSPASTLFVVSKHPSSPLPTSPLPLHIYPFPISLRETIQNGLHMPRRHAAFAPGPAMLLTSHPLHQTSASAACP	hypothetical protein CCM_06134 [Cordyceps militaris CM01]
EGX91998.1	MAGITMELPMRPAPNAASAAGVDAAAEAARKMLQDIKCRMQEFFNVLIRMPHIEPDALRLPPETGWENVGDTRLRARGKTEGAINFLKQLPCLVHGAGMEQPSLTPRIQSVYFSEGIACRMPERHVADAPGNVVWIGEAKSADGCFLLLDTSTGSLTEVSLSKNTRLRKPGKYKALPVTLKWMARKTMPATDWLEQETRKLLELAYIPVPAFFPHGVRFFHRCSDPRMLPAFIAADNYEVNGGRNWRGEFKKNVKPDEDDKVIEDVKMDENVKMDEDVKMDEDAKMDEDVKMDEDAKVDEHAKVDEHAKVDEHAKVDEDVKMDEDIGLTEDIVPNKDIRSEVDSKPNEDAAMSDGNGGENGDATSEWWALTEDEDEDEDQDEDEDEDQDQDEDEDEDED…	hypothetical protein CCM_06158 [Cordyceps militaris CM01]
EGX92002.1	MYLSAEKTKVALSSTSRVPPWSPMQRSQTLLISPHIPNMHRKTDTGTATGLPNPPQPRLFPSWYLVLDKSTFLLVTTLTRAVSPAKRKEEKLLVLLGIIILFNLFVQSAMFLVVRSTTTLYSSILPITDDNPDIIINLLCVASVAPHTARLAFQDQQARFHGALASVCIARQCTTAHLRRFSYAIVDPTFNFTR	hypothetical protein CCM_06162 [Cordyceps militaris CM01]
EGX92003.1	MNKAWRLGAPPAVPGPMLFHEPTPRYPKFHPRQACAIEPDPLCYFCASSSL	hypothetical protein CCM_06163 [Cordyceps militaris CM01]
EGX92008.1	MKGCYVRGKFNSSMPLLSLFMPSSLVVPVILSVPFITLLRLDYCGSRTQAMKAQRDIQLTYLSAL	hypothetical protein CCM_06168 [Cordyceps militaris CM01]
EGX92018.1	MGSYTACDRSPAGQAKRSQGNRWAPAAKLRRPWAKRRRAIGWVVGARGVCNDLNLSGWARDEQRVGWLVMAWREVCAMSWERAEFSPLIRGRFAGLSPARCSVGAGFGGSGYSWDLFNSRKPLLCRM	hypothetical protein CCM_06178 [Cordyceps militaris CM01]
EGX92025.1	MTQPAPASLLGLSLPASVDFAPDAPNQRAPYRTACGSAQNKHLLPTPINTRWAAPLTVGGRTTPKKKKKNQIKNCIAIAHAPRLQHLYPATRRHMHPASYSSEPQQTPPTANVFRRGFLPFACPVKRTIGHTSSADRSESLYAV	hypothetical protein CCM_06185 [Cordyceps militaris CM01]
EGX92037.1	MPPRSPWLPKQMAGLGGQDQQAGISVDPVQEGNLSSRSYALCRIRHFTSLWLPFHCSSNQPKLELRRHSLQLQLATQRRRSSIASFMEPAR	hypothetical protein CCM_06197 [Cordyceps militaris CM01]
EGX92041.1	MDASLYDDERKQRVKRTEDWLVSNVFGLLEKDERRQQDRHRMILGGDSGLYR	hypothetical protein CCM_06201 [Cordyceps militaris CM01]
EGX92047.1	MFFFINRGTLQFLPKIVLVILLVLLYSDLLGEYSTNKTQGSKHYCNDPDGLQCFVFPVDPDEEFWRAM	hypothetical protein CCM_06207 [Cordyceps militaris CM01]
EGX92051.1	MCGPEYNGDKKITLTCQGRDPWMDHGRVPSSISIRSASCSEQIARWRVRGVWLQVSLAFLVQKSQGCVVRRAGAHGIWPSLSHNISGTLAICYTLLSWLSCSQRVISVVNRASPPGLIVL	hypothetical protein CCM_06211 [Cordyceps militaris CM01]
EGX92065.1	MPAHLYAEQQCDHQVQVTSTYRRMCNLPLILAAPGHLVTLTFLATRDDETLFPSHTLDLEPPIRSTHRQDPLLHASQTHAWRVSSGTTEPVARLKMVPYGGSVILRRHTPTLAFKGSRTPLGSVWRNEATSAQLGFIYSSVVIIPKPTRREGPPFPQSRRPPRLLAIALFTLDGGTGGPKGRKRYGSTGVTGPRGPSSAKRIMRFTAYDVFAMLYSDMQGHSAYPVN	hypothetical protein CCM_06225 [Cordyceps militaris CM01]
EGX92079.1	MWASDLFIRLRAPQLVTAGDGCSRDHVRWGKNLCSILHYLIDSPLLTYRPRDAVLNDV	hypothetical protein CCM_06239 [Cordyceps militaris CM01]
EGX92080.1	MGGDFSCVYKERASVFIHDQRSHTLKNLVGIRRPGAKLAVVPARRVRCRASGRLGWPVLSLFSAENSPWCALASSYSSFETHSRPPLCWWTPAMVLSLSRVLSQAFCPGSCRPLFVIAHLARYRASGVGSRVNVAYMEREGGAETSQWGSEAAALMDKMKMHLGMAAITNSYH	hypothetical protein CCM_06240 [Cordyceps militaris CM01]
EGX92081.1	MPTVKPTYALATTLCVIWRSGRVVDMSPARRLTEPGVAGIKKETNRKIKRTIKENT	hypothetical protein CCM_06241 [Cordyceps militaris CM01]
EGX92082.1	MRTRTLQDAALFCVLSGPLAETDQRAMLLQGLLVLNRNRREDEITNTARNRDRALSSLGPKSLELCVGAVTPYGDGVCSQFSIGAVEKSTPSRLRESRNQVVNIMMTAPYR	hypothetical protein CCM_06242 [Cordyceps militaris CM01]
EGX92083.1	MCIGLADTFFNAVSYLTSRHVLIREAFPRNGSEVAQQAASSQLNRPMKTKPRSSRTEAEPCRDTDSLGFTSYIDQQCQETVLHGSECMSTNKTTSAAAHSPDPALWSAPRKRSLAAPNGDTFAAP	hypothetical protein CCM_06243 [Cordyceps militaris CM01]
EGX92085.1	MALPAVVTTQRRAIPAHSFLFARILLVTVIEMASRPEGTWPAVRCACKPYKPLQTKRRPCLHRANEIPVHIATGDESKRSHIVTRRQCLEAPGALLTAHPLASAYHPIVQSTSQPSPWLGRGGGTSHLDTQNLPPELPLVQVADHADVDYWPWSPSENLSHTTRFIKSLGCHQLSVLASSGHNAFVTNTHNM	hypothetical protein CCM_06245 [Cordyceps militaris CM01]
EGX92087.1	MCRSDRGIIAPGLPLSAPISLGGAFPGAKAASAFSKILHDRSSMTRREGLEKASAATALPAVVHATNMGRIKRRTGGRPRDDDIVSA	hypothetical protein CCM_06247 [Cordyceps militaris CM01]
EGX92089.1	MPSLCTPSHSSQRKTNLFQFQGRWRWQGPPPRSIHSASGATRGGGAGCRRGGGITPRLSQTADENRAKNDQRQPPPAGLSCAPYQKRNPGPLTERTTEWSRQLGLASLHELKTPRRKGQEPCFLAPGHVKYDKFDALQVQLRDFRPIRQRYTGE	hypothetical protein CCM_06249 [Cordyceps militaris CM01]
EGX92178.1	MPVEELFLLPLAPMQGYRLGHPVDPPKAKIRIRKPACACIAGFRDRPCMDARGPDAENPLWQLAHRKLRVRAAEAKAFADGPSRRAAGAGHHHTAHRRGHVQAGADLDARFGPEPGLDGAVLGKRQQSEAHVAFASLARVGTGRDAPARHDKVAAGPHHARRANVGAQTPGLAGLRVGEGEDALVRFDGLHARLHEPGEPPGGIAACGKRHLEAVVVLGFAVEVGDVAVPGVEDVGGCEAKVVDRHDDG	hypothetical protein CCM_06339 [Cordyceps militaris CM01]
EGX92211.1	MPQPTQTTGLTLEEVEQAVATLVPYLQAAGARFSISGGAASLLIRRHHGVAARVTEDIDLVVQPSARVTAESISSYLLQAYPTVFVGKELYGTIMPALAFTRPDGSVKHVEIEIFDVSVWPQRPQYNLDDPANEVTTLCVLGVDTPVFSARWLIREKIVTAFERRGSRKEATDLDDAIALLNLVEDNSIDMTNFEDAVRHIYSSCPEDRQILELKIHCPNVLGE	hypothetical protein CCM_06372 [Cordyceps militaris CM01]
EGX92239.1	MKGVVSVFIVKIEAKADLSRWLAAGQEDSQFHENCAQADDSPASAPVPRAGLEPLCGSALPK	hypothetical protein CCM_06400 [Cordyceps militaris CM01]
EGX92285.1	MVPEPVLDIISVGVFHGGWRIERAPQPAARTEELHTRDRERAYVRAGVCTSGRMYERAYVRAGDASLIGHDTVVQLSQLAMARWGGVGEPHDNPSWSGHL	hypothetical protein CCM_03655 [Cordyceps militaris CM01]
EGX92303.1	MGNCIAHLLLERPRLGLDKLRLKLSDPTEAEKDSCHLSSAPFFMAESTAETCSQSTPTTMKIPAALARSLLATVSWPFSRDDVHARDRCDNVRTKCKIEIERFLNLCLDTTQQRHWTPDESDKFCKNWNASDWAWQQNTGLLKHWGDNPGWAWQTPGPWMDPEKFLFYPRKCVSRNTSSSSSSSSTPDAPRPPGWHYPDSVPRLRPGPATVFGIREVLLVTEDFPTKIQEPDGSTLIMHDGIMDLALCVSRLNC	hypothetical protein CCM_03675 [Cordyceps militaris CM01]
EGX92321.1	MDQSRRILQDTHALAYVAHRRLEEPAFSEMDKEADIPDQYGHVQETDGQTERESIMPRLIFQLNNARSASTGHTPHEIVKGINPRDVPDLLGGMPAKPNYTAVRVSAYDALAIVAVTMKNHYDRRHTTRFFAVGDMVYLRLHKGYATAATDCHAILQ	hypothetical protein CCM_03693 [Cordyceps militaris CM01]
EGX92335.1	MFRVLSSQGGSICNVHPTRLLTGPAPSSPTILLIASTRFLFQFPPTPLATPSSGRPPLISLVPNTTIIIRILSVGASARQHFNHRISHPRNTSRRTSQRW	hypothetical protein CCM_03707 [Cordyceps militaris CM01]
EGX92364.1	MHLEMLQAGQRAPPHTVRCVGGEKETILRPVAKKNQHGPLIFCIAFDYTFLQTCQKSQEEQPGEANRQRRGPGAVTERLALMTLARPVGEPAPVVGHRAGAEKWRRAEDGSKCVFAGDAGNTSGMREIWVREILDNASSTQLWRKRENNRTMAMAASRIWPTSLVEMADATAGCERDLRTPGSHRPTGCGERGHGVRVRTG	hypothetical protein CCM_03737 [Cordyceps militaris CM01]
EGX92390.1	MMAAPTAGWPGAIEERLGVESGDTLLLWFVPDAPLICGRAQVVLPQLLLHGSGAAWRQTWGPPVKTYVRISYDAMKKASVSNE	hypothetical protein CCM_03763 [Cordyceps militaris CM01]
EGX92391.1	MRCLRHPFPGRQCDVLQLRSNILGFVAAHDVCPLHCSSCFYAADTGVRTGSLHSDVSSRVTFASIGPRRLLRGLVCALCLRLRSPVPRCGNLNPLYSQNILIAASLTAIGGRYVVCYVCVGLPSPNLLPSWVSVGLHVRLLRRTVQRLAGRAMVAPVDFLLCMRIESLNATEPENLLLVASLVYPRVAVLPRIITERDLQARIGGQDLPMQGDPRFVVLANHNARLSPLLYHYESMGHCHV	hypothetical protein CCM_03764 [Cordyceps militaris CM01]
EGX92394.1	MLEMRCCGRWCGSSPGSCGRGARKPFVLTVSRARRNLPHCSSDSAKAHHGGCSCGLRLSGGDAIFDGQSPVCPHGVISVTRIIRTKMKDGRGYAHRLSMVIITLLQEMSPGGTGGTGTLMTAKTIEALVDT	hypothetical protein CCM_03767 [Cordyceps militaris CM01]
EGX92397.1	MMQGKKKKNRSVCVCALSLACPARTEPQSRLIIVRDGRTDGSAARDGAQKLERGRTLYLEAWEIRPSRETNKKLERRVEKKTTNRGSHHQQVACQALFFWSLVSALASFQ	hypothetical protein CCM_03770 [Cordyceps militaris CM01]
EGX92398.1	MTNRHFFFFPSSHVPYLSPAAPHRPCVRFPAASEKGSGTKKRETYWAMLRNEAT	hypothetical protein CCM_03771 [Cordyceps militaris CM01]
EGX92401.1	MILCISDNMTRYLQQQPEQSPRHLPLTGQLQCRTRNNALAFNKMATKINNGVVISSCDDRIYPLPGRRIREQRNVAVSRSWRSSDISVRNSSDASPGDKSLSLLHCSLVVAGATSTLPSPSEALKLWLAAASPELGNLLLQLAQLCRPGKEHTDSNWAGLWCPPRPGDLYGLLKTPAVVKHIWRRQFPRDNEKSSRGPFDSVLECASAQENENSAAPQPGAASFRLSSQLAVTHLATECDLSPTLHRERGWVAAQCHTALVATFYSTKAQLLTTKSYHCLAAQRLAFYSKYRQMLTHYTAVLR	hypothetical protein CCM_03774 [Cordyceps militaris CM01]
EGX92403.1	MAPRRLWWPCLAVLLQDPLAHLDLSTNNELTTGTSQPGLAGDLDRNSSHLLTHHPWSISEPLKQYAVRALSSGLLLFILRPHPFPCHPSPPRPGAPHTPLTLTSHTSLTHHTPWNPLSPQIPPQQRRPLWVHLKPASRDGT	hypothetical protein CCM_03776 [Cordyceps militaris CM01]
EGX92405.1	MQVTDTPRVPPQIANFFKSRSKIKSHPRAKAPNKKLSQDSGRDLTVDRVNRPRQVSHAQS	hypothetical protein CCM_03778 [Cordyceps militaris CM01]
EGX92406.1	MQGLFDAVWEETCLDPTKSDNMNHLCLLPLDRTSSAHFQCIMLFVLRSAEWRGSSAMETQHWARDSWG	hypothetical protein CCM_03779 [Cordyceps militaris CM01]
EGX92419.1	METRYNPNNCLGLFLLKYWRLWVGQWLAAPKTLEQTSQKVILRFRNISGLEGRCTTQIESPSGDLGPPARQPCVAYFLLHMLDYLSFGLTLTTWLFTRVNFPPMVITGLMQEIHLQPRKARHSANKCLNRCMLLQRRGGCRLAKSRLDTYYGKNCKAPPNLGGVGESPK	hypothetical protein CCM_03792 [Cordyceps militaris CM01]
EGX92420.1	MAAMPKRVTDNPWSLLAHLDVAAGSKTDPVLAFLPWGKDSGGAAGPKCVEARELASLQAGHVQVRVERQVRDKSEGSVGAGAGGQGPAAKQYLRA	hypothetical protein CCM_03793 [Cordyceps militaris CM01]
EGX92421.1	MYPLDRHITWLSCTRTNRMHWGTHPAILRIASPSPGSCLVRRSQRCQVSTQACQAAQLRPNPDYILAAWDLIEPTSAAAAPRSPLLLLAPILCLVLSFVRSSSVFVPYTHVSQVSEAYVASQRTSLTRVSKDPAAQHGSH	hypothetical protein CCM_03794 [Cordyceps militaris CM01]
EGX92426.1	MCDYGQAKVDCQYQPNALGENSDSDRRDPYHPIRTRAPADMYRWEVPPPETTGVTSIQQSNL	hypothetical protein CCM_03799 [Cordyceps militaris CM01]
EGX92430.1	MLRHSNFKLQSRHSYRGTKSLPVRSGAVRLQSSDEEATMMRSVVVRRAACTVSGLGGGEEEKEETLASCKLGIDYV	hypothetical protein CCM_03803 [Cordyceps militaris CM01]
EGX92438.1	MNFKFIASRFAIVTCEACRSPTRRHMCPVDQALEQDAYSSAQRWNPGATV	hypothetical protein CCM_03811 [Cordyceps militaris CM01]
EGX92441.1	MLEATGELASSPNDGHDLDREEEKNNKTKNRSDNSLEHPYLQAADGATLRAQGNSSKSRGGNFSLSGSAKRQTGWLAGLASTDTYLVSSLSPIESRRNLATCVFSIALPNPFD	hypothetical protein CCM_03814 [Cordyceps militaris CM01]
EGX92447.1	MKDSKRRFGEEAEREASPTLIYLVVTFHGRRSFPNNPKEHNGAISITSLFHWEGKYEEDLGTCTSILPSTMNIQHDHPVCVYQAVGQDADTVRKLTDDSAIPLASPFSKLTKV	hypothetical protein CCM_03820 [Cordyceps militaris CM01]
EGX92450.1	MCTPQTGLCFNLIIIRLATTPWWPLWHFLHTLVSIESDPDGACRRSPLWILVAVGEELQSFHDDKKTKKTKMVVANWNGSSGKSRTDGPIPRQAKDVCRGKIWYMMLEYNLPQPCELYPQVAYWSCYHHL	hypothetical protein CCM_03823 [Cordyceps militaris CM01]
EGX92452.1	MYQVRPAKLESSSKLVAASRYLSAPTSVFSSFPSHHVSISRPLVFFFTINLAIFSISSFVLPLPNPASPSIVLGTAALTSNYRATTHHHLSPCLRLCWGIPGPPPQLAAGLTLCPSHTTNLPRRPVNSSPSTNL	hypothetical protein CCM_03825 [Cordyceps militaris CM01]
EGX92457.1	MSNSDMPGGQTRPAPNEPPSDAKETPSLQVASFHLSCCFRLALVLSSHASGTLERLDPGLVWSADHLTRASPKNGTSNLLFWGRLDWPFDQSITRKRQFSHIPTINPTPSNSCISLGG	hypothetical protein CCM_03830 [Cordyceps militaris CM01]
EGX92486.1	MASRAFRRLSLLFYVFCPSVIGSLIAGLAAGGAQPGGRAWGDVVKAVTKTSKQTRIRRILEVSRRDSSVPGSCIVKARISGRRLTGLARSAGKHHGMDRTGHGLA	hypothetical protein CCM_03859 [Cordyceps militaris CM01]
EGX92515.1	MVVTNVQEYATALANARNTMQPWRAAFSRLTGGIEDNGKVNKILPLISAPRWRKQRCC	hypothetical protein CCM_03888 [Cordyceps militaris CM01]
EGX92524.1	MCTRGVHSVIALMNCRGTLVVLGTSTMAQLLWAPPEFFPPAMSLHRTHPPPYPAPPPLSSTVNKTLVIGIGSVEIPVKLGLLGPFPFDRDEA	hypothetical protein CCM_03897 [Cordyceps militaris CM01]
EGX92603.1	MISLGLSLIREILRASLFLSETWHNPALGGRPQLVPGLEDSLLVLMGATASELAPTSGAQLEGGSQSWIECTHPGNRRVPTPAGRRQRNRNGKAGVELHHYYLCPSNLGKKSTASLLIKAGRNGSLCFDANKAS	hypothetical protein CCM_03976 [Cordyceps militaris CM01]
EGX92634.1	MTCASFSEMALTEVQEYRKISFLSSSGQSGVTSLFVNNSTLTSVLTHIQLAESNTRAKTPSPTTVVLVPRLSGDFEARKSSSFHSTRPPLFQLKARTFIPVTPQRRLLFPGAVSCLRLMCLPSETRSRSVSLLDASSSQTLATV	hypothetical protein CCM_04007 [Cordyceps militaris CM01]
EGX92646.1	MHASLLLSLHCVVQCARDHLPMLLLECSRQSLFLRIFFLIARYGLRIAEAEMTFRRRRFHSALSAKFSGNGHFLQLPDERSEQ	hypothetical protein CCM_04019 [Cordyceps militaris CM01]
EGX92650.1	MFRVDGPAATAPACNPTGSKGRRTSQSIWAICGACYEPPRIDNKVVGKGVASGHCRGRKGVHFAELFSALGGKAVLVVLLITCPLRPAKLRSLDLKVKIEIETAGRNLLQEPGFLRLSIKKRNAGFNGYTSCVGKPGGGRRSKRDKRRLAIGDFSAELLDRSLPRSKVSLIPPPKNTTSFLAGPSVPIAHISFPPSVLTSFVCRWPEEGGLFIFPFSWLLAIVPERDLGWRPANDDMERASGAQQNHCEMGGAAPWVRPSDLHTGTPWAAHVFY	hypothetical protein CCM_04023 [Cordyceps militaris CM01]
EGX92651.1	MASCSAVTGLDADEGKPVRTHCNVTKRPCREARYVVGGPDLGPGVAVLGDTEIAARLTLVAMYLDGVGSEKRARVSEEDHCTRVLDHPRKKNHCLHPPYNVPESVQSCPSDTTVGIALLPWVALLASKLPPLYKFQGSWGVTFIVHARLDPPCS	hypothetical protein CCM_04024 [Cordyceps militaris CM01]
EGX92653.1	MGPADKTPRAGKQATLYNVCGKSYQARRVAGSQGDKVQSGSRYSITKTLRVVGAESGTSVLLSYWSA	hypothetical protein CCM_04026 [Cordyceps militaris CM01]
EGX92664.1	MAGGVSMVKGCETKAVTVRGFEDKFHVVGGHVHVGQILQLNPKRRRRKTPFPTGGMSKTTQLRSLPFPMGSSEEKMEENEEKNEDINRMRLISAAEKKKDEQKTSNC	hypothetical protein CCM_04037 [Cordyceps militaris CM01]
EGX92676.1	MHENSIGPMCTVSTEDQDPPAVQGQPTIWRRWDRVSLLAARIHTGYWSWVQKTRGNEQLLVRETKGEETEMGRGVMDSENLEQ	hypothetical protein CCM_04049 [Cordyceps militaris CM01]
EGX92678.1	MATSLKSTTKQVRRLSDPGYPYWNVDMPLTGSWHPSQAYYDKTPEPVCHIGLNERNGLKFASVSLRT	hypothetical protein CCM_04051 [Cordyceps militaris CM01]
EGX92705.1	MYWHWQYHPSARMQKLPANWYSAERNAKLGTRQYHGAPILDNGKRKTAPGLGSRRIMQLFNGRRVLGS	hypothetical protein CCM_04078 [Cordyceps militaris CM01]
EGX92706.1	MACRLGTNGDRSRVGVSPARNQTSCPPKTLGSIYRLLANGSPSEASRHTYKLTR	hypothetical protein CCM_04079 [Cordyceps militaris CM01]
EGX92707.1	MIGSLASRKQRQPGQGRRLVGVETSDLNPQRFGQLILSGRGTFNSLPSPIQCDLQMTSMYQHLISSATPSNRAGVRNIVFAQACIWFGTDRYQVVDTCMGVPVGAIQIHTNLGSWLNFLRLFHLDGEATEKGIYLQRHYIDCL	hypothetical protein CCM_04080 [Cordyceps militaris CM01]
EGX92709.1	MICQFTHDPEKDGRDDHLSAVEMRKSVHKSAEAVDPPFPSLRPAIKAQRPWDRDTPA	hypothetical protein CCM_04082 [Cordyceps militaris CM01]
EGX92711.1	MYNWTRCQDAQVRHKARTRRLVPEKPPVPSRTHMARPSWHFHNAESRPLPWLGGVNPSSTSCLTLLD	hypothetical protein CCM_04084 [Cordyceps militaris CM01]
EGX92726.1	MACDPDDLSPNPLFVWLKLTCEAAPYGDLFRLLHCTLPFESWPWQAMRRAYASWLTASGSPRDALEAGSCGIVGSGVVYGNVLIPRANERYTATTSCMLTGGICHGLGCSISLINSLHPFTSASGDPGLSLSQKAMALESIKETIGAWEVVLVARFRDVTRPDASSLRAYPGRVMRV	hypothetical protein CCM_04099 [Cordyceps militaris CM01]
EGX92745.1	MRDPATTRPALAIEPLRCSTDPKYYGYSEVWLVSRSRILCNSRAVMLAPKDGTALAIQLFQL	hypothetical protein CCM_04118 [Cordyceps militaris CM01]
EGX92750.1	MAKLILLHVSANDATYLPVKPGPVAEYEPQHVMAPIHCPRQRCHELVPCETSASVKRTVQKKYTRRPVHRIRGPEYTVRARILTPYLIPQRLVRSYQKTAAD	hypothetical protein CCM_04123 [Cordyceps militaris CM01]
EGX92782.1	MLVILPAEVTRDSECKIPVILSYLHDRFQRGSCLYLPSRHICDGVVWVLLPSFADCTSPTGARSELDGTGTGVDYSHERNMMYYRGESL	hypothetical protein CCM_04155 [Cordyceps militaris CM01]
EGX92827.1	MECGEEERMRGRCGTRGSSVGGAAAAAAAHNSAGQGVGVAGGDKAPAPFSRFDEGGVLLV	hypothetical protein CCM_04199 [Cordyceps militaris CM01]
EGX92847.1	MSPENTCISMVIHAATRCALICPCFARFQRGNSLSAVTSKKKKEIRLIPVPPRQLHPPTSRSSPVPNKTSSADANATSSGSTRREPVTLYRGKTFTRSSESARSSRCG	hypothetical protein CCM_04219 [Cordyceps militaris CM01]
EGX92849.1	MKFQGSLEVNSIILKLCDLAAIKGMGLQQFVSTAESLGLVGGDVNTEAFGHNIRSTTKDGGSVLASPRKLCQSLCCPRRDPIYPQDWIGPSLQQPGPALGHRKALPASEWLRWAERLYLSILWLLWNVLRMLPRTATGRQLYVCMMQVLAPLLSLQTRLALQSAFAHREMSLGE	hypothetical protein CCM_04221 [Cordyceps militaris CM01]
EGX92876.1	MPCAQPHSVHWASSRQLGAHILRASNAINIPRHKPGTPVVLGIIIGTQVKSTTKKGWAATRFSSAPVERIAKVSIYCLSYRLHCELGDCRIMSLTDRPFASEAATLLCLDGVEVVLPKEYKRTSNIATSKAFSILFSICIGLYMHHTVLYMAEASMVIFHPQCLRYVRFPSFQQRSETPLQKSCGLPALMHCISQNTSPDFVNLAVVGPLPCALYQSAAERSYEACRLVMKQLTCWLLRSAAKRHREMP	hypothetical protein CCM_04248 [Cordyceps militaris CM01]
EGX92903.1	MGHSRLRAGNRLRSTYKNYTKEGPMGNRAVLYTILETSDTRRKVTLLDVTTEVGYAFSSGMMASILQSTLPLLNEWSTPWTTFLVMGTATATSARHLVETPLG	hypothetical protein CCM_04275 [Cordyceps militaris CM01]
EGX92959.1	MVFVGDVDSRCGRRHTSVAHLRMSVVPGGGGRRFASLAAFPNSWEPVLLIPHWETHAPVSIEYDHPAANIKCEKRKTESGVMLALGENSVLNAPLVDCDADREKVKSQRYKLLTLTNVPIVI	hypothetical protein CCM_04331 [Cordyceps militaris CM01]
EGX92987.1	MLSTRQDDKSPCELSLACCTHQPMPAAAKIQCHVSGRIVHSLGKDAKNACRRDAKEARLPFKYTTLAMEGDSIWLVFI	hypothetical protein CCM_04359 [Cordyceps militaris CM01]
EGX92995.1	MCHSKNPALVAELAIGVHGLFVSVRLPLQTFSAQTVIPCMIWIEDQGSVQATVYGGQ	hypothetical protein CCM_04367 [Cordyceps militaris CM01]
EGX93005.1	MTVRNLLHDSVNREPFTARFITCSVSTEICIQAGVGGTVVEFGEAAYGVRQVFATFSLLSRLLVSVYTHELKLTYDESQSFEKHTPIISRLSPARLYTSETS	hypothetical protein CCM_04377 [Cordyceps militaris CM01]
EGX93006.1	MRRNKYENVLSKHPRKGSTPCHVDVILSPLEAVPSRCFFRAGPSKLTSLFLLCSLFLFCKKKKNTVEAESDVMYHLPPCVTSSPSQGSLTHLGLYDEAKTAAFL	hypothetical protein CCM_04378 [Cordyceps militaris CM01]
EGX93009.1	MESGSLDLVLGALLQLVPARLFGATNAFTPLTPGPCEPIKATAPFFGYPSPINRHPPIVMANVAGMRQLGGSVVYIETRNAQLHGRADVALSANLTQPDAPTATTASFRTTPRHKFTA	hypothetical protein CCM_04381 [Cordyceps militaris CM01]
EGX93014.1	MLTVAQTSFLPFDQSVITELGCGIDTTTERCIGREVCRVGDDIRMLASTGKHFVGFWAAD	hypothetical protein CCM_04386 [Cordyceps militaris CM01]
EGX93015.1	MHPLYSRTSLCLHMIARGGGAVITLPGFALGFAGSAGTLTNEDIYGGEKRDGRPMVLFVLLPSSQTAAGDEG	hypothetical protein CCM_04387 [Cordyceps militaris CM01]
EGX93024.1	MSPRMEWRKGGQKIPVLNELERALHLLREGENLAASSFRNAGVDMITRGAEIQKFLSLVGPMVKPADIRQDSIELGAEGAWFPPSRPLT	hypothetical protein CCM_04396 [Cordyceps militaris CM01]
EGX93027.1	MNLAMSRVQKRSIWWRSVNFVKLALVFELLWFRRGFEVGRVFAHGAGWAKSLKDDVSGIVIIGNGVMDSGNNVRNETRSLVKDTKKDKDIAVMPLRAIDAGN	hypothetical protein CCM_04399 [Cordyceps militaris CM01]
EGX93100.1	MGCRMGTIAHLFVVVLDTDADILLATPRRGVRMRDRKGAAVLGDVGELVRLAALDAGAGAGAGPATLAVAVGAVGVLGVLGAVVLCLAQADGGEEGQRRDHVADVELDDAPDDEHGGVVVAELDAVDLRVAQDGAERGEEAEREDGDEAQLLLEPDVELEQDRDGEHGDEHVRDDGEHGVGGKRGDGGQAGARFGGVPRLVNLDMAHVSQKLLFKASISSYRIAVKDEGEGAAQVIEKDKRNGGPDDDAVCAIVGALQQAQVADEQGNLEEADADLVDGAAGVVDARVGDEVLLGPLGGHQAEAVLGLDDAEDRVSNGEDEGEDAHPVVGGDAIVLLANEDARADDDCGQPGHDDAHGDDHLVLGLRIELRRAVGDEDHGGGGGGRCVAPGRGKLFGVC…	hypothetical protein CCM_04472 [Cordyceps militaris CM01]
EGX93119.1	MPAFRISFFVLQAKGAREQAFQRASDSCWRRSPDVYAVHGVDLRRYGLYLFFLDPQGPQGLLVNSLDSANMPRPLRLGFLRPPVSNRVLERTPSTDYRQPTQSSFAQRLMQTVGEHASPPPQRPPNSHDALLCTMTCVKLEPPNIKGGPSLKILQDTRNCYAVRVLLDGDESWAKRTNNMSSSLADELNRPLPLRVALGAGSSCLPFQALREENRRHCLCSANTPTMDAASSSRSLAIPASPPHHRQRFKCVLVVFRPTETPRRLGNGNGSLSAPPSDHLASLATGAASFSGPSCWRHFARRIADSPPILRDKSQLSLE	hypothetical protein CCM_04491 [Cordyceps militaris CM01]
EGX93137.1	MSPAQEKRKYRETAPRAGGSKTCLPFFSQPGSGPSDARPSRLRTSLPALETGDDSGKTSIISLIRAGLPEVTWPAPRSVSCNPKFTPFISRDPQVSQPAN	hypothetical protein CCM_04509 [Cordyceps militaris CM01]
EGX93138.1	MPQSGLPAAFSWTLLLHLETFHHLHACRHQHSHKFCSTEMDVEVEPDMGPRTVLRRLKFPVPGIALFGDFCTLVLPLPNTLQICTCWREEVDSSLRWSHLGARRTDPS	hypothetical protein CCM_04510 [Cordyceps militaris CM01]
EGX93160.1	MDGQMVCHPLGAGSAPGTTISFVGVAGEAALLNYRVPRWPSRPCFAQMNTPSSSSLFAYGGKYQGNYMLAILTGSWYGQATPPYHSIRTGLLGLRFRDILQRGKGRNSPGARPLAESLAGLILAVRVSRGVGGDIGAILDQPYCSESARTLVVCSGEKAGDIRANRGET	hypothetical protein CCM_04532 [Cordyceps militaris CM01]
EGX93207.1	MSYLIIFPGLNRPPPAPDPRPAGYLLLTQPGLSQKKLPPKKRTDAAGFLRLGTCKYVHDSSPSAEGLGYSLSSRRIRRRRRPAA	hypothetical protein CCM_04579 [Cordyceps militaris CM01]
EGX93254.1	MCVSGLAGVGSFGRLFGVLGRRASRKPRRAKIGSDDKANTPASFSSNFAQEVPRGVQPHHSISIHGKQDQKQIFRSLRRRGRGGGGYGERSDTSDTRSSPFPALLSRRNLGQLCPSHPITPPLGQGEWANAQTPTQGCKPSRP	hypothetical protein CCM_04627 [Cordyceps militaris CM01]
EGX93329.1	MATAQSPPATGSTTYPSAIDTYYIQCPAKPKSTRHLTEVLRTLPRPHTRAQARRNQHINETMPMGLPSSSSLTTSLARRWDTTSNKGPTVNNNTASSNTASSNTANNNMGSSNTDPLQVNTASRDRTSKVLINSRATLVTTTEEAWAAPPLAFLVV	hypothetical protein CCM_04702 [Cordyceps militaris CM01]
EGX93371.1	MQSALAACGSIKWLQLAMAKSEVQQDAISATTIRDPLFWLVHSHWPFYPGEAQRKTGCCHSTEYMPYGWYRRITREYACMSVVEIWLQSSQMHISSHQSTTSPILDSSAHNAMHLDMT	hypothetical protein CCM_04745 [Cordyceps militaris CM01]
EGX93414.1	MADEAAFLSPQTSRKRPAGIGQLSTTFLSPRPQLNKGTCTGHREAIAVGLVGYLFVAPASKCPTSRLVYAQRAYQ	hypothetical protein CCM_04788 [Cordyceps militaris CM01]
EGX93433.1	MATFLGRNAFWARFRPLIRLGSCATLGRFQANVYRRAGFPDPFFLTNSGQLYSMVLVWTGVLLWQPPSCFLPSMDPCRPYSPCPLAFAAPSSVARIHNSAPRSHTRGIPNRLGFYAEKLKDTWEGGRATRVAPRAPLTEPCCRVWQGRTEQKAPKLASFPD	hypothetical protein CCM_04807 [Cordyceps militaris CM01]
EGX93445.1	MTCSPGRLGRRVKRRHFFFFYLFTIFTILVTLSLLLAYAGDGPAPGLGNAEFGCLMAAVRCARNQAGGANAEGNAHHLIKDSYILEEVVVPGGGGWTRHSSSIWNVPSCKLLISRSLTDFSEAATRWSELRASGASCPAPSGCFEIVRKLSLSFDCRVDKKTALVNASSRCQQPSSLSQTVKVAAWNYPNCLAALLLVTSPVSETDPPTAISSTLLSSGPSLSGPTGHKPTSQRTDSLCPGHQIICIVIVLCDSLWLILLCRLINSSLFGPPHIHLPRQHAHAT	hypothetical protein CCM_04819 [Cordyceps militaris CM01]
EGX93460.1	MVQGEPKPWDDVGWNQAFGDWPREILSRSSQWYPDGHANREGNWFMNNPQPGCQAERSLATQHVD	hypothetical protein CCM_04834 [Cordyceps militaris CM01]
EGX93461.1	MSQLYVGPVQAPGEQLQITGVQSGIIPQRSKQKLSVELYMSWIESCSQASVLPLVLVREIISSSA	hypothetical protein CCM_04835 [Cordyceps militaris CM01]
EGX93462.1	MWMPSLLRKLPGGLFINPDTARMPKQGERGGTGQKRYECNSGETRGRPLLPRPRYQRESSPGTTCVAPPLRSPRPSPAGLAGVHCSSWQSSAGSSIQSQDDYLASAGGLPSIGGHVNYNMGSFRPRMRWRKPAGAASHARRKSSRRADSLSPSLLSRSHALGVYGLGRAAFVLATLQRGRTHAQITCQCILVDEGTWDKAFRPVESHVFLREEKGITMKLVHCLSSHLSRHEPQRSDEWHAAALCAIDNSPARCGSASPNSTSSAYTAETRQASSRQ	hypothetical protein CCM_04836 [Cordyceps militaris CM01]
EGX93473.1	MSPFPQSSRTQFQKTPIPLGTFQGLSWTLKDKPLSALKNDTSFSPPPPPPRHDP	hypothetical protein CCM_04847 [Cordyceps militaris CM01]
EGX93476.1	MAICIKNTTLLHDSHWPCTATLLVHNYSYDRACFHFDLLGKSPVQGKRVFLLGLLSLALLTPVTPLRGPTKFR	hypothetical protein CCM_04850 [Cordyceps militaris CM01]
EGX93478.1	MPTCETLPGAHNVRRCLTDLAGVGGHTVFSLVPPSSWDPRRRGALNGDALCEAFLCIKDPSSLDGRSPVFRTSSKSLTASYMAP	hypothetical protein CCM_04852 [Cordyceps militaris CM01]
EGX93491.1	MPETRWVACLMSGLPVLSNSVLQAATGRQQFAFEKCNETIMSGGIALTNTTTPSS	hypothetical protein CCM_04865 [Cordyceps militaris CM01]
EGX93495.1	MAVAAGNKRAPAVPLEFSGLGFAAQGSVIQRLLLRWSQARLEIPHGRPMSIVSEAKYTLLLHFLPGYASSPVGPLISVVFACQLATRPKQLGSWRTNRDPGTPRHKAMRGSTHITLLAPPTTLVGCNGQGEGLGLVRRHPVPTRSLPGTLGSAKVTLRDQTNQLTVSSAK	hypothetical protein CCM_04869 [Cordyceps militaris CM01]
EGX93496.1	MATSTKYYYLRRAVHALPPYSSTALRYPAKYTTKITLAPLNVAMPGLCCHVYLKLPRFSIPANVLNAPELRIRPPVPPYPTTAKCPSSMSHLAFHTFLQSVSKQPSAHHFPQPAGPRIMTTA	hypothetical protein CCM_04870 [Cordyceps militaris CM01]
EGX93498.1	MLTGFEQDADPRLSFWQTKPSRALVSWSLQRTSRHMCIWTAVQDSARLDPRFESLCEADDGRDGSSWLLDLPARVLDISQLRWLLPQILPSPMRILSRWAM	hypothetical protein CCM_04872 [Cordyceps militaris CM01]
EGX93516.1	MAATVTEVLPKKLHRPQSETSLSRSLSELQEGSDDNTGNTSKDDLAGIEGSTGVGGTLGRGQRGRGGRRRGGGREGDAAGGLDGGGAVEAGHGGHGRVHAREGDGLGHVLRVGHGGGRRRRAGDGGQAGAVAALRRGESREDGDEDGRQTHR	hypothetical protein CCM_04890 [Cordyceps militaris CM01]
EGX93564.1	MCHKNGELANRDVAASLLRELHYELRVLIVMKVAGSGILRKYIGDTMYIGHETGLVRRQCQDAIDLFEQVAEWVDEHGLVAMQRQIHA	hypothetical protein CCM_04938 [Cordyceps militaris CM01]
EGX93743.1	MAVANPVFPPMKLHLQPRDGCSLCRLVPSDAVAYAVRHPCRRPSRVRSSPNRTELRNKTRSNAPPHGPFRTPAPPPHYTCPA	hypothetical protein CCM_02012 [Cordyceps militaris CM01]
EGX93744.1	MYQLGQWSTGDSRLGVSRRLISGEASLLRAQLRRDGRRAHFVCCQFIILRYGPSSLAYRLSPTVAE	hypothetical protein CCM_02013 [Cordyceps militaris CM01]
EGX93750.1	MASDTTRKRLVSQRLLPPMVRALIRFYIVTWSYSQQSTERTIGIAIDTQHGHRPT	hypothetical protein CCM_02019 [Cordyceps militaris CM01]
EGX93773.1	MTITDDSRCARTTSAGGVDREEAWRWQTRVPTASRIGAAHQGQTFGVLVPHPTLKGRNRKNAQATFLRQAPAARHDYSGRDGGG	hypothetical protein CCM_02042 [Cordyceps militaris CM01]
EGX93774.1	MGTAYVDTQRAPLGLISSVISFEDGQGYRRQGPVWIVSPGRATADGGGVIPSTAVNS	hypothetical protein CCM_02043 [Cordyceps militaris CM01]
EGX93775.1	MCQLSLRPATPEVHTCNLAKPCFFDPAGKMTDRLTLGSVSIATPCLSTGKISLPQWNARR	hypothetical protein CCM_02044 [Cordyceps militaris CM01]
EGX93784.1	MRSPAATLLAWLYHGLISRIVHYIDSSINCALETVKRVKPSSPLHTSPCITPTNSFKSSRMKVIIGLVALLELAGAIPLVAEPDTALKSDIALQSDTTLESQAAQGLPSGLCIYSFCKPLKWMGISEKSYTNCKATCKIPGKMLKASCPPLCQELVGKIPLVGGATAAICTRMCEALFDDKDPPPQSCYFGRCMEFSIGV	hypothetical protein CCM_02053 [Cordyceps militaris CM01]
EGX93800.1	MKRISLFHQTWKAAETLRLQTRGYVDDMNSGVLDFLPLLTGSGTLNLTMPILEGGTGRACAEPASFWPVPPPVRVRQCMPAGEGPN	hypothetical protein CCM_02069 [Cordyceps militaris CM01]
EGX93801.1	MFQKAFERLVHVIRARFSSADSSAVFSSDTVMTKRLLHEAVVVAQSFTRHRRHYRIIRFAAGAVIPPQHCPRPLVLLADEAPFSSLAQSRSEDRQWIAHLQVAANTAAWTVARSCMDGDVRREHGASSCTTAREETRHGNNPTHGTGGTTTREGRDVHLDRQPPTPPPPPAQASQKSLVYLGGRRGYYFASPDIDFFFWHPMESFSAAHTTIEVNVDGDDHMMRICRKGRPSHQDVQMYIVWQKLTILST	hypothetical protein CCM_02070 [Cordyceps militaris CM01]
EGX93854.1	MDWFDGWERMDELDEGMECWKEGESDDAYIDRPVLGAPRIPSPDFNTRTKKKNERTSSASQGNPEDALQGAGNPGAKREASSQLEPA	hypothetical protein CCM_02124 [Cordyceps militaris CM01]
EGX93883.1	MCRVTGCALRSPKSILEAGSGMAEASFKDLTVLRTVNQHAGSVPCSRLGPVGQPASPTSLCGGVLAPSKAYREALRPCSQRDNYHKTAANSDAATRWCPVPAFALGTGCHEVQDVKTCIVISHCIKK	hypothetical protein CCM_02153 [Cordyceps militaris CM01]
EGX93901.1	MAVATAVCGTDKARTMKWYPRDENLRMVLAGVKPCVADFTTALETEERVKERAAELTAELAALYGPRKKGKRQDSKAQETGSTNTEQQGPKIVREIKQVKLVIHTQTRDGSEKETKIMLSDRDPKFMAVLWQHVWKRMHTKLIHTTAYRPPRQAIHPTYRGTRRLRSYPGLVD	hypothetical protein CCM_02171 [Cordyceps militaris CM01]
EGX93902.1	MIILPNPQCLTAASSRRDGLFLPLTSTALRAPQDDTGDIDDAGDTGDTGDTGDTGDMGDTIGVIIADSGARTTHQQVNRRRHRQLRSSRRLRIYQF	hypothetical protein CCM_02172 [Cordyceps militaris CM01]
EGX93971.1	MSNDDEGLRQIGKPRATASPRCQPCGLELRVDSSVACGASSYRPSRILEIGPGGDVTYSNTKVEKNLGEQRAHQFRRPSNIDPRINLDVARNRNSDSPTVGCGDRGGRPVTRTWGRKHPDQPLSLQYSTVGSPQAERRGRTRQTPHVVEPGLESREAKQRSIANQRVFSLDFPGRRVRK	hypothetical protein CCM_02242 [Cordyceps militaris CM01]
EGX94005.1	MYQTPETETQQDREKDAAYVVVGCVAAWDKARLPYEELITHLFAFASLFPSFPSPFLPSLPLSLAIWLAIAHWTAQRLLSLTAICPLAVERLLSESVLPI	hypothetical protein CCM_02276 [Cordyceps militaris CM01]
EGX94039.1	MNNPIHTNPCSNWITEDDLMIYDPKPHSMYNIKRFVYYLSSSCTYLPPPNDDQNDTSGIPHA	hypothetical protein CCM_02310 [Cordyceps militaris CM01]
EGX94051.1	MLQFSYNQPATYLTRHERQRNVHLTEQNRTTFSHYPSQLSLFGCQRWLVGNRAAADGRISTDNFEAIFKGDGQSVQGGADNAVDLSHMECLVSTKASFCSEIAASVCNLDFVWGKYTRLIWRIFVTFNWLSETAPGQNLGEDDKKLRRHSASPGPEVWVKNMSGYVGLDALEHIIDLLQVGAPGVGRGQPENAKGSLDNLLLTCNWSDDTAQGRNHSTNPRASSKKRGQVVAFDQINQVNSAVL	hypothetical protein CCM_02322 [Cordyceps militaris CM01]
EGX94055.1	MYEVQIMLVPAGGPPNQGKTRQAPGWRPDKANHGRQTASRLFNPTCPCLASCIQVPSTSPTPTHLLLPSQLRRRKAHILASQATPDSPTQPSNHDAASGTTRPSDPSQPQGRSV	hypothetical protein CCM_02326 [Cordyceps militaris CM01]
EGX94058.1	MYTPDPSSDIFANLYVPEWIHTTARHVRGSAEDTIKPCQPFSVADPSWSGFTI	hypothetical protein CCM_02329 [Cordyceps militaris CM01]
EGX94059.1	MHEKSFACWLEINQIQKLKETWSWRVTCSHNHLTNALSRELSVPSSGDRSHGPSSTVAARTCLDEMNFIPLLPVGPSLHSVATASFSRGIRNATTKMGRLPVVNLVVLVADGLPSQPATAV	hypothetical protein CCM_02330 [Cordyceps militaris CM01]
EGX94062.1	MRVPEGLSVLPARFQAPRNTQVSKLALLDQPRNKPFLPQVFVRRLEAFFEKSASLQEAWQIMHLPMEWQFLECHFDLAP	hypothetical protein CCM_02333 [Cordyceps militaris CM01]
EGX94164.1	MSRLLPSPPYQAAPGFSVSVCRCALGGQSLDLSRRSDQLRELSPAGRRAMSGRGVSEGCRGEDVDGY	hypothetical protein CCM_02435 [Cordyceps militaris CM01]
EGX94165.1	MSSQFASLARDFPGVSNWAKEVRISFRRAAWACSRHLYQLPYRDSSPCPKLDPPTSRHTQSAYRGIISPRSDEKTDGRGVKGGFKVREMGIGRLKMQDNGGSRMNRGQHALPTRA	hypothetical protein CCM_02436 [Cordyceps militaris CM01]
EGX94168.1	MHLSVTADTTETTLFYTSTRRLIIRTVYGLPPPTQTWQRPASSSSPDRPLALRPTQRLTCVRLRLSLTHSHCVDRANPRTSPSLESFAFRAPACAPRPSALLAVDHQARLP	hypothetical protein CCM_02439 [Cordyceps militaris CM01]
EGX94169.1	MCPSGRFGEDVSGAKDVRNMAHLFTPDASGEMPLQTRGCESLCELESGINRACRHGAGENKKDTHL	hypothetical protein CCM_02440 [Cordyceps militaris CM01]
EGX94191.1	MMRYECNDAQFPIPPLKTERRAAVATLIEKQAKDGNANVDANVDANSNGNDGKTIVSKFVRFDRADTTPSETGQITWRANVGNDVDGARRETFSSRRPGKKRDIFVAPIEGPWLLSRCPLSVVRKMLGTRGL	hypothetical protein CCM_02462 [Cordyceps militaris CM01]
EGX94237.1	MAGVKSGHWSVIRGLKVAPAKEFRWWKVCSEDPQQGGFFVEGKKARRHMQFATQGPGGGIHSPSPT	hypothetical protein CCM_02508 [Cordyceps militaris CM01]
EGX94299.1	MWLATDTTHNTKCRVKRAPAPRCASWSAVDTSLFSRSSRSATQRGPAIRHKRSAPCGVGADGLGTRSNGTFEWGVSNDADRIERVRQLSVNALGEWMGDATLA	hypothetical protein CCM_02570 [Cordyceps militaris CM01]
EGX94305.1	MSRDKLSGGVARPQARFRPKFHPWRASQTSLDLQAAEKGSLPEGNTQVDKAYGKRANNVTWPPWHANRTIGAAMAFLQRQLGPSVQSTLQRVETLQDAVSIPCLQPVAVTAKPMAPPASQSVGRPS	hypothetical protein CCM_02576 [Cordyceps militaris CM01]
EGX94307.1	MDDDNVGIVHRACSTLVRAAENPSATPPCPLRLCTPSPALRGMMHRRIQKARAMEGLLEALWNVVDNMAR	hypothetical protein CCM_02578 [Cordyceps militaris CM01]
EGX94308.1	MCVQKRVKGENRRAQQLQRTKKKAIFDAAVLDGEGRSLEAGLVVRKIEKGRGNNWPSYSGRRTMQPKCTRLSIYDSSHPFISPQPAESQKEYLLPLLPQ	hypothetical protein CCM_02579 [Cordyceps militaris CM01]
EGX94309.1	MEQRIDKRSPRLNITSVQIRVSAMNVEFGEDNSRTVWKHPKSDISDIIALEVATSGPLLSFRGL	hypothetical protein CCM_02580 [Cordyceps militaris CM01]
EGX94312.1	MPEEEECPYVHTDNYPGFPSRKVRAMLKPLPAVAHRPISATMGNDWQRAAATRFTVLMPL	hypothetical protein CCM_02583 [Cordyceps militaris CM01]
EGX94313.1	MQPDGEGTTRNIGRHALCRPLSSLVMVVCSPVVLKAGGPEASSHAARAGLSGGVDTHLEAVMRYMARSMGKLLIAVGRRCT	hypothetical protein CCM_02584 [Cordyceps militaris CM01]
EGX94324.1	MEMCQQNVHNRQSIPRKGACKPNVAAKWNTPIEVADGALLNFDGTVNGNVNHVPPWSFRLRGLDLRLPSNSSLTVDLFTGAVPRTSAQPTEPAMVKLHYKLEKQDIKHQLAARITIQWVIE	hypothetical protein CCM_02595 [Cordyceps militaris CM01]
EGX94325.1	MASNANGVRTYCPSATRRAKGIRLRQKSKLRSAEAARGQPACHVVTGPTLSRTEEIDERDEQGMGKLTSIIT	hypothetical protein CCM_02596 [Cordyceps militaris CM01]
EGX94392.1	MFQISPTHTHLRTITNHIHHTGSSLIKRFPQWGNRFNTIIIIKPSQKRSTIKTTAPTLASMPDAPSSPSYNSRALPFYSISSYQNPVSCLGYHDHHDHAPHPITPNQVIRFPPPSGAILTSLSFSPAFSVLHSPSCHQSAHHLQARKKQERTSLWPAPPFSPFQQPASRSGSLLENRTTRGPA	hypothetical protein CCM_02663 [Cordyceps militaris CM01]
EGX94430.1	MQFIFPLMSRETSLPTSYPVTSSTTRHLKNIKTMISSPDGPCSASLDARLQKARPQ	hypothetical protein CCM_02701 [Cordyceps militaris CM01]
EGX94455.1	MCSSIDVTPFSTLVQRCAELQAAKSATLFSAPHVTSAQAAGTRIVRIVLHAVLLTGLQAQLQHQQGTSSRLSLSIQPPEADVAQWIPASLNIPTGLASHQDPRQLVAGPSLVLEVLELLESEHRLVLLQAMRKHKSKRGWHLDQPHSRPNSARLGPNSTPYYSSPLQFSHCPPTFSIASSPSHQSSIEPFAALAINTQKVRIRPINLSTELPLISFRPLSCLQLVPDVQGLANSAARCLRQVTTVPMELVTRMVSELVVFHGVLFKYFGAEFLNYCCQCWCIPDLYLFQVTKVQSTSQR	hypothetical protein CCM_02726 [Cordyceps militaris CM01]
EGX94462.1	MIEKFKRVVSAETACWSCIYMNSWDRVLEFPATLMLHSCVGLSAGEKLPKVGNNGDGKIRQSSG	hypothetical protein CCM_02733 [Cordyceps militaris CM01]
EGX94469.1	MKARCFGPRPCSSCLAGYSLSPQPQRGLISSLAFSWFGQFQLANPIVVLVNFKVTPGLVWSQGQDPNF	hypothetical protein CCM_02740 [Cordyceps militaris CM01]
EGX94486.1	MQLELNSFSTTPDHPTNQIHNLQKLDRCSSLCAFENRKTRSFSETQMPDEHFE	hypothetical protein CCM_02757 [Cordyceps militaris CM01]
EGX94519.1	MISEGWKPVAKDRLVPPGDFAIVQSRQHPSNFWIPSASSPFPSSVPLLRNFAL	hypothetical protein CCM_02790 [Cordyceps militaris CM01]
EGX94529.1	MIGYEKKSMRRSLRKIHPGPTSAFRPEARDRQDFKLEREGFGGLAQITSGGTDMYRLAALSDILRTAGTVKHGSPSIALVHAGATNPGRVAAGGTRPISRSGDWHPGLAYTANESNSVTRAPEKFARAQYWAIVMAREDRRLGRLAGHGPWCGNPVISEHIQLFGGWGAATSGFCKNSVNRRGGDPMGQDQASAVYYWWRGSRATRTCRALMPNTTAGGGEASTSSMQTWCGAVRRGAAYTHLVIFLARLNMHWAFCSNGPLMPAAMAHQHEQKTTKENGERLQQMSQSLARHQPASVGGLFPHANSAGIGRPFCRNSEPGLPHIKTAT	hypothetical protein CCM_02800 [Cordyceps militaris CM01]
EGX94579.1	MDSEHCPLAPSLIQFGLSSANRLPSLTPESRPVWIGKLEAANSPRNKHDEKQGTTDIHQETSLEQRRKYQCGLNLKSLQQGIRSGLDPGAAETRRPISLP	hypothetical protein CCM_02850 [Cordyceps militaris CM01]
EGX94580.1	MYAAACWVRGEEQSVSVSIRVLDLFASNKAHGWCGLVIGGQVPISWSRGTDVDRLLADVELAVPIESELVAVADQRSRARPLHASFAQPTRRFLMNRHRSKAGGLGSE	hypothetical protein CCM_02851 [Cordyceps militaris CM01]
EGX94585.1	MASSAPVGHHGVQRISDQASARLEASSSTTRYILGLSARGGTKQLASLGDFWLLLFGYDHGVVSRGLDAFPRVAGRSNTHEYA	hypothetical protein CCM_02856 [Cordyceps militaris CM01]
EGX94597.1	MSCIFIHSLASSRAWQCHVSATGAGDASHVLHGAVMPSVRLPTPARQGRPCAHHATGGKQPRRASHGIDLHAMLLVNHADEITGPPWRTTELGSPQSRIPVM	hypothetical protein CCM_02868 [Cordyceps militaris CM01]
EGX94598.1	MCAGQILTLPAELLDQHTVRATPRRRQPARGVVLLVLRLVQVALSALPPQFKAQPGSFDHPRSHQKHADGSYQARVHGFGAAHPSDKSTLAHSRPADVTLGPEPP	hypothetical protein CCM_02869 [Cordyceps militaris CM01]
EGX94609.1	MLDMIRPTRWRGVALAVYYTVPSLGASLGPLVGGFLVHAGGGWRWTFLSAAFSAPLLGGVALVMAPIPWCFWIYGERIRKRSRHETSI	general substrate transporter [Cordyceps militaris CM01]
EGX94613.1	MAGNFLVLAQDPMIAAPPSQQWRTEAAAPLSLSSPLSSPLPTQQLQGYSSADNPALGQLQPGIK	hypothetical protein CCM_02884 [Cordyceps militaris CM01]
EGX94623.1	MWNVEVGLSSLSHVVSIPGSFESTRPPYGATKDSGNYHPDKATTNHSLTCSDVSTPYRCKHLLQTATGWRATMHQLFPSPCAYPYIYICFTKNLQFVLVLVTGEGQHLLITYKPPTTSYSFRPTGATRKEISNLTHHEVMMDHEAPYNVAGATNELLLWDWAGRGIKLGDRPASLASNV	hypothetical protein CCM_02894 [Cordyceps militaris CM01]
EGX94805.1	MRRTQKGSHNISTQTQTHPALCCACQNVPRTKPTADGPPWSLRNPPRECEETHTSPPP	hypothetical protein CCM_03076 [Cordyceps militaris CM01]
EGX94806.1	MREWRLPFIRLSARSALRWSLTQAGWMHYFLACTRHACDERIVEVLIAVGVRPVPAELVELGASGELRDPEISLWLGNRAAWHGAAMAVAPGCQKHKVLREHGRGVETSPPFPPYKAYKEVFPHYPPAFL	hypothetical protein CCM_03077 [Cordyceps militaris CM01]
EGX94814.1	MTKLLVAGESPSDELRQYAYLSWDRKMSWPFRAFSYRLGQRLRDDGKSRLMFGIELASGASASVDYGSVSVQYADALSCCWRRSEWECCEEACH	hypothetical protein CCM_03085 [Cordyceps militaris CM01]
EGX94826.1	MASPGLSRLGLPVSCNAAPPLQLTPPNGVVVLFEEKMAREQQQRPFDMAVHRLSGLAAGTSNDMLLLCVSGNNSYHLVTIADTHTQRQELIRAMAGIFRTTALHPRPDLQKCSVGSWGGGKAAPMLSQNGPTFISSLDLAVIPGGMSRPKGPPSFGEFRDLHGEVEHALTRPAGTA	hypothetical protein CCM_03097 [Cordyceps militaris CM01]
EGX94828.1	MQRVHVPQSTPTTTATVPQSADTAVTALLQDLGEKRVTTSLLTSLPLLYHP	hypothetical protein CCM_03099 [Cordyceps militaris CM01]
EGX94856.1	MGRLTSISSHQLLSSSPLAPVATHQPLWNLPPSPSAQANPKKKRERRRQFSSSSAHDQLHSLHARPRGFPAISKLGFHTPLLFVGTGQFRTASHQDSLRSRAHVRLPSPGSLHPSIQPPTVRHTPPCRPHNRISPSLLSLCPET	hypothetical protein CCM_03127 [Cordyceps militaris CM01]
EGX94865.1	MQQPKQQSSFRAYISSYPSNTTSPFITRNASEQIRKYKTFEIFLNLGLPSPLWLSVYHGGIAHVQSLVCDLLRQEASTLAIRPLSLSAKSKPFMPHVLMTSKSNNILPCHPNRNPSNSWCRDAPLLALRFRNTENQYVDRSSLMLIAHKKNKNPFPQASFCAVVERQAHTDRKTE	hypothetical protein CCM_03136 [Cordyceps militaris CM01]
EGX94870.1	MQRIHPLSRKLELIRKICIRGLYKLQEERKPHTGAHNTHKHTRHARCQAMLHQPDLNKRRGWRLVNAASDTEPEPEPSSSSPALIHPYFAYFAVQVWSGPPPTAANNTSSRKKLSANVQYEYGNAFPSFSYIALFQSLFQQRHSGSSHLALGRREKKVVHHPDSRTRLKHIRVNTRPESRQTLFAEFLGFSPIVSNNVKPSDGRRKKYSQKKKVRLPYSLPPDTLMTGSGSARGCLAKSDIDNMALSA	hypothetical protein CCM_03141 [Cordyceps militaris CM01]
EGX94874.1	MIGASAAALSSVGKTYCAAGNGQFQKQKASRLSWGRAAAARSREQPLVLPIIYELLRTCAVGTKRQDGLLTWAALGNRLGGWTRFIVSIPGAVNNMRPSQ	hypothetical protein CCM_03145 [Cordyceps militaris CM01]
EGX94893.1	MSRMVRRRGSHPSAKYVESLVLFRYTSNNSSTCCSEERLGDEKKSDGNFHFDQYYQFVDSHGTFEGDNMQVMPGGTIA	hypothetical protein CCM_03164 [Cordyceps militaris CM01]
EGX94894.1	MTSGALLQEASQDEEALQEEEALQEEEVLQQEEEALQQEEEALQEEEALQEKEALQERRRCIFSAESSAYHY	hypothetical protein CCM_03165 [Cordyceps militaris CM01]
EGX94957.1	MLPKFSINSKRDEYQNTTKTSTIIVSSPRMIAINRRVVPFTIVRIPSCSFFTSFRKGSAAMKEIEKNFSAKQRFSTSKIPLSAYRFTEKEDARALG	hypothetical protein CCM_03229 [Cordyceps militaris CM01]
EGX95025.1	MTGGPNDQRSAWRISRPPFIRAFRAHPSEAPRALRFELALRVRASLLRDEERCDIAGAKIKQAGNNL	hypothetical protein CCM_03297 [Cordyceps militaris CM01]
EGX95040.1	MKPFAGTRRKDAPHLNATLHIDQGRAFLQDPSCRPFLLVNGIDFAPEIGRLALAIKALTNVVPLVKFFDARSCCTPPPGQTAGPLTVSPGMEKAKSMFLSCKCNYCSPNRGLACNTCPEIRGPFHDTAYNKGNRLTAHSRPLAAPRPREHNQILHYKATHSFYAMKIQTPT	hypothetical protein CCM_03312 [Cordyceps militaris CM01]
EGX95107.1	MLCHTPPIVALVVAKPLQPGNFLPGRHSASMYVFAHLDSIGRITLRIVAVAAAVGSQSSRVYVYIPCPGAVTTTLQPQDDVRTNAYYLHGRSME	hypothetical protein CCM_03379 [Cordyceps militaris CM01]
EGX95113.1	MTGYFDLILIMTFEAARPVILTGVMPKTCPGWQCGCSAAWTTGYKGCASPTSMLLALVKGGIVAHSVTQCRLSDGGCHWPFPGSVGAYNAQRVHSRTACGVSQPQVAMSHEVQHGSLLATPLEEFSQAGGSAAWDGISTPTPRSLAVKPSLKEAHGQIRHPTKRRTPFLNESRASSFQ	hypothetical protein CCM_03385 [Cordyceps militaris CM01]
EGX95134.1	MRRVQHGVTSSEASEPKTLLPPSLPARLEHVLELIQAHFPIHCVAFEWPLPLEVPIFLDKLPQIRNGHYKASTRAKTEYINTILEASVETAVPEASVKIIETVSEASVEIVETVSEASIKIVEAVSEASIEIVETVSEASVEIIETVSASVEIVETVSASVEIVETVLESSVKLRITDYQRTSRNQSSKRSGEGN	hypothetical protein CCM_03406 [Cordyceps militaris CM01]
EGX95155.1	MHVFHSMPGNVRTAGDPDENPGKYKDRRGVEDRAQDLSRSTKRARACARRCAQATPDDQYK	hypothetical protein CCM_03427 [Cordyceps militaris CM01]
EGX95193.1	MAFMERELLLKAPQMLGAWNTERQTRYRGVALSQWRSLADIGLVYTAFAGVDLAKPPREHQLWQARSNVAVDACFGIRRKAGCRLCFTGAGVWPLRSNERRQVVHGWRGYHDMSKTISVTTKIADEPHVAVQGEFQRI	hypothetical protein CCM_03465 [Cordyceps militaris CM01]
EGX95232.1	MSTCKLLLISAPRFMQSGIIPNVDLFQCQNDDPTDKRTMGSRYTITCVSGLSTAVRPNHGNVLVPWTRRARHWRASRRPVASDAPPLSLPGLTKLGKPAC	hypothetical protein CCM_03504 [Cordyceps militaris CM01]
EGX95266.1	MQSASAVSCLVTTTRGLVTEAAPRGAKSPGQALLGIHHQTIILGCSCPALALCAPDTYDSGISRFVSRSHDRRKSRLMVAYLSDSGQSPHAKLSSFVPLS	hypothetical protein CCM_03538 [Cordyceps militaris CM01]
EGX95325.1	MRRQRGKRIFDSALLPCQSPSALRCPLLGRDMRVVQLRDRRYNQRLNLLVGLVGRYLVGAERAALGVAPAALSRDAQPAVGAAGAHKDHFPLARRQQVANDEVVLVAVEAGARLVHQQRRVRLELVAGNHALGRPPVDEVLEKLGHGVEVHDEPLGARHARRVKVVKRLLLLVGPRQRARRVRGLDLVLGHALRRHEEVGHGGRQVQQAGGAERPHEARQPAQLVQVVANGDKREQEQHVVLAGLFVLAQHGAEARLVAGADHDARVVGVLLEEVQEAVLGVRVVPRVRLQAELAVQEDDGVPGAEKVLGRRGAARARAEVVDEPHRLLLQRHRRPARRDEHDPALRRRVGLNKGPRRGEVRLEVPRRRVRREVGVLGLD	hypothetical protein CCM_03597 [Cordyceps militaris CM01]
EGX95402.1	MCNCRLPLPLLRPLWVASSTTRTGSGPGAQQLATSRRINEEIMYKLLARPLPLSRRHISSRTSKSPSMRGDLVMEQAHPSWNTPRRRRPASVPTPPVGFKSRGKPLSPAAMWRPSRRL	hypothetical protein CCM_00056 [Cordyceps militaris CM01]
EGX95485.1	MSEYGRRISYRRLRYHKTWLGKQPECLHLNKCPVAREIMTGDLSFMRNYRDVQFGRISGLPRNGGAKSYIPGCLGGSHGYINNISAAYLTTVATVWTFDANK	hypothetical protein CCM_00139 [Cordyceps militaris CM01]
EGX95503.1	MPLYKKPDCNFSLFPHSSSTLPLHDDARVGGDTGPQLRGLLADGAGDGGALHLALGVDDDAGIVLKVEEDTVEALPGLGLADNDGGVDLLAELGLALLDGRDNHVADAAGGQTVQAGTDTLDGDDVEVAGTRVVGAVHDGTAASCVLAHCGLYFALCAWRRGRRRGVGGNVHRETQGHLELATGGTTAARSLLVLLDRRYEVLRRRAALLARLLRYDVGGNWFETNGDANSIRRRKTTSGNSIAATQCIRRPVFHGCSHIRAQVVIFADPAHSSSYPANLKMSPAACRPDLLLLHIVCFAFACIVEAESSRGSRENLRDLGHCEGLCVALIREGETAVSGIAVVIESFQGHSGENFLWGEKPYVEASELARDDKPLIQPCVGRL	hypothetical protein CCM_00157 [Cordyceps militaris CM01]
EGX95514.1	MMMRSGVDLYPKSQSMHPLVDEEEGTKFTMVDSDVNEDLSRFSIRSMENEEFQVRGRDAD	hypothetical protein CCM_00168 [Cordyceps militaris CM01]
EGX95515.1	MLPSCGPGDWAGWTAVRSVILKRADKSVGSDVVGSADTRLQTRSAISPHRRRRHLCSRFSHNQFAWGCITSPVYLGGLSKSVPSTSSAGPRVADRALRLPATIIGTYQDGKKFAISPQALAGTRSRLRQGTKPGQYKSPFPLAREQTAQRVVHRQHLADNREADFSEAIILSSVNRRLRQWRMLIPDFTARQPRQGFRRPTAPVILGASIL	hypothetical protein CCM_00169 [Cordyceps militaris CM01]
EGX95530.1	MPRCNQQSPLRVGNSRLHGLLQVKVKVRPVQAVDGNKTSAARVLGHIVLGARSGPNLRLGSHLALEVIRATASLLVQGRSLGRAVSTAEVGNAEDGLPVSSALAGLGLGRTVPEASSGQSTLRPAVLDMRKVPVHGTRGSVAVQLVAHVNQRLGGSDINVVHRGKVKDNGLENWPGVVDGLLQGITWRRVVPGTILSRIVSQLNRIKQRATTYANFADKCNIGSASLLENGRREVVQVARRVGVVEAFGEAVHVDTRIRALKIDSRVGAVFVVKWQETSSERLFGISNEGVLSTQAGHGAVRRRGDSADAGNAKEATAAQEQAPNNNSKGNADCGVNAILNGGEDGHQDTGEENDNFERRDTPELQNHLGRSNDVADSVDDDTSQRSVGNVVEDGRQSV…	hypothetical protein CCM_00184 [Cordyceps militaris CM01]
EGX95539.1	MSDEGSAYRPRATLGWSSAIEFVVPGGPSFDQISSLRRVAGYKGALIACGAHRALSEGVLCTEYTRASGSHRIALKCGMEWDDAGRRTMSAFKARVVGGGAPRDQASAWRNEEGATRRSWEAWKLDEERRGIVSLCCLFELGARRTSQAVGSVGRWRRSCNRYPWASWRLFRCSLGPEKQGLRRAARDGVGFGQRLAVDSSQDTTVPAFEAPERMTRRRSWQLATGNWQLATGNWQLATGNWQLATGNWQLATGNWQLAGISTSSYDQRFWRANGADEAMRRQHRNTGNNKYQNTGKRAMTCSEWDDSIETHPSSRNDATAVPESGATRGLALGKLVIQKTNFPPGCDGLRSPSWIHGARKELVMDEAVPDPGH	hypothetical protein CCM_00193 [Cordyceps militaris CM01]
EGX95574.1	MAPNPGKPTQSLKPLGINSHAHSAPAAFPSRKSDTAFSKPGTRGFGIHNLDGQPYSRHSLSHPALEIGISERLIRTWLANVGNQRKWHVASTKMDEEKNGPIENVSPRSSTPAQNAASHQDVFLCSSLSRSISTSSHNARGWRGLTTCRMMQPDGSKYEVLSLVHAIGTNARPWLPKPHHHNES	hypothetical protein CCM_00228 [Cordyceps militaris CM01]
EGX95579.1	MCSRSKPKMSHWIQAATFLMPVLFPGLRNMLHVSSAFRLDSSKSRPFVQIR	hypothetical protein CCM_00233 [Cordyceps militaris CM01]
EGX95609.1	MRQLIRIIVDGQTSGILDQRNIFPGLLVSSASVRTLPDNKAMTRVVAFASR	hypothetical protein CCM_00263 [Cordyceps militaris CM01]
EGX95619.1	MYRAEIAVKANSQPGERHRPSPSISFPEGHDHLSAPSGSQLFDHAAGGRDCIQRAAKTCIPFVQSRDRNLRKHIMHGAARRETCSSLLKPSTSRHTDESPPSSVVQLKRVEN	hypothetical protein CCM_00273 [Cordyceps militaris CM01]
EGX95622.1	MYPGGWAVLRWSAMSDEGGKGGWSGKLVTRILHTPHTQGNIELIESLGIQCPQHRGGSAGSTPTKKACVAPAPSLLGKRAKLMSCPACSETRAGSLPEELLNLCSIWSQ	hypothetical protein CCM_00276 [Cordyceps militaris CM01]
EGX95628.1	MTSLPANCRQRASDSVLPVDMVLQCSYLCRVHRAPVVHIENQHEWLAAFLLFAITNKLVLNRNA	hypothetical protein CCM_00282 [Cordyceps militaris CM01]
EGX95684.1	MASFAQLSIHLSAISTLSFAPARSSSLQQILGVAASPRSTAVQSKHNPQQQISPHSARSPCITTATTLACKRQSQPRAEGVQVYMPRKPALSSTASILRDRGGQIHQNTTCTGQVAIILSPHQACSLALGSLPYKQQDKREAKESGRPAIAEEPGIRNVLDAATDTYTLRPRVHSSFFADSGHWVRPFFLVTKFIKRGPDACPSDAGIKQASRGPKFFWKGIWLAGLLSRAPIAPPHSRLKNQAEQQKKNKKSRADSVLTEWRDFFGRSHPSLV	hypothetical protein CCM_00338 [Cordyceps militaris CM01]
EGX95744.1	MCVPVSKEPVRKPASQPAQVVTYNLVQLHGRYNRGKLFIKKAIYLVAGLLTRLLAGFLAGWLLAGWLVGFLAESAGDPFDPDIWHYFICAGLAAHATICRLSMKKRLSRRDIRQKPTLESPLSSRPLLSLSPGRFISDNSFIYPSRAVSDGGRSGDYE	hypothetical protein CCM_00398 [Cordyceps militaris CM01]
EGX95895.1	MPAVAMTKNNTVDRFLGPYPSSSSPSQESPTPQICYTILVPCRLNSVEQVPARLDFNGESPPVLH	hypothetical protein CCM_00549 [Cordyceps militaris CM01]
[truncated: 60 more rows]

## Sheet: C.militarisATCC34164
SeqID	Amino Acid Sequence	Description
[truncated: 117 more rows]

## Sheet: C.cateniannulataFRD24
SeqID	Amino Acid Sequence	Description
[truncated: 88 more rows]

## Sheet: C.cateniannulataMCB234
SeqID	Amino Acid Sequence	Description
[truncated: 208 more rows]

[truncated: 8 more sheets: B.bassianaJEF-350, B.bassianaERL836, M.brunneumARSEF4556, M.brunneumARSEF3297, E.festucaeFl1, E.festucaeRoseCity, T.reeseiQM6a, T.reeseiCBS999]
