# Supplementary material for: Discovery of a fungal Tc toxin complex and functional mycoserpin through a novel two-by-two comparative genomics approach
Source: Front Cell Infect Microbiol. 2026 May 22;16:1800461. doi: 10.3389/fcimb.2026.1800461 (PMC13236867; doi:10.3389/fcimb.2026.1800461)
Supplement: Supplementary file 4 [file Table4.xlsx]

## Sheet: Info
These hits consist of clusters formed uniquely between two strains of the same species (two-by-two hits) that mapped within 5kb of eachother on the genome. They may comprise BGCs or multimeric proteins unique to the species.

## Sheet: C.fumosorosea
Chromome ID		Accession number	Uniprot Match	Protein Name	Species of match	Function (Uniprot)	Uniprot seq length
Chromosome_OY756920.1
3272778	3273074	Cf_grCorFumo1|OY7_000992-T1	No match	No match	No match	No match	No match
3273319	3273688	Cf_grCorFumo1|OY7_000993-T1	No match	No match	No match	No match	No match
7236131	7236586	Cf_grCorFumo1|OY7_002262-T1	No match	No match	No match	No match	No match
7237797	7239263	Cf_grCorFumo1|OY7_002264-T1	P13188	Glutamine--tRNA ligase (EC 6.1.1.18) (Glutaminyl-tRNA synthetase) (GlnRS)	Saccharomyces cerevisiae (strain ATCC 204508 / S288c) (Baker's yeast)		809
8488016	8488500	Cf_grCorFumo1|OY7_002664-T1	No match	No match	No match	No match	No match
8491476	8491736	Cf_grCorFumo1|OY7_002666-T1	No match	No match	No match	No match	No match
8516165	8516584	Cf_grCorFumo1|OY7_002676-T1	No match	No match	No match	No match	No match
8517225	8517641	Cf_grCorFumo1|OY7_002677-T1	No match	No match	No match	No match	No match
Chromosome_OY756921.1
1043448	1044007	Cf_grCorFumo1|OY7_003043-T1	No match	No match	No match	No match	No match
1043448	1044007	Cf_grCorFumo1|OY7_008078-T1	No match	No match	No match	No match	No match
1043448	1044007	Cf_grCorFumo1|OY7_008121-T1	No match	No match	No match	No match	No match
1046563	1047125	Cf_grCorFumo1|OY7_003045-T1	No match	No match	No match	No match	No match
1046563	1047125	Cf_grCorFumo1|OY7_008080-T1	No match	No match	No match	No match	No match
1046563	1047125	Cf_grCorFumo1|OY7_008123-T1	No match	No match	No match	No match	No match
5029743	5030609	Cf_grCorFumo1|OY7_004247-T1	No match	No match	No match	No match	No match
5031451	5032389	Cf_grCorFumo1|OY7_004248-T1	No match	No match	No match	No match	No match
5201422	5201683	Cf_grCorFumo1|OY7_004288-T1	No match	No match	No match	No match	No match
5201979	5202479	Cf_grCorFumo1|OY7_004289-T1	No match	No match	No match	No match	No match
Chromosome_OY756925.1
161293	162691	Cf_grCorFumo1|OY7_007477-T1	Q8J0G0	ML-236A carboxylate methylbutanoyltransferase mlcH (EC 2.3.1.-) (Compactin biosynthesis protein H)	Penicillium citrinum	FUNCTION: Compactin diketide synthase; part of the gene cluster that mediates the biosynthesis of compactin, also known as mevastatin or ML-236B, and which acts as a potent competitive inhibitor of HMG-CoA reductase (PubMed:12172803). Compactin biosynthesis is performed in two stages (PubMed:12172803). The first stage is catalyzed by the nonaketide synthase mlcA, which belongs to type I polyketid…	418
166294	167371	Cf_grCorFumo1|OY7_007480-T1	Q8KWT4	Dihydroanticapsin 7-dehydrogenase (EC 1.1.1.385) (Bacilysin biosynthesis oxidoreductase BacC)	Bacillus subtilis	FUNCTION: Part of the bacABCDEFG operon responsible for the biosynthesis of bacilysin, an irreversible inactivator of the glutaminase domain of glucosamine synthetase. Catalyzes the dehydrogenation of the C7-hydroxyl group in the 4S-tetrahydrotyrosine (4S-H4Tyr) to yield anticapsin (epoxycyclohexanonyl-Ala). {ECO:0000250|UniProtKB:P39640}.	253
1314599	1315684	Cf_grCorFumo1|OY7_007780-T1	No match	No match	No match	No match	No match
1317226	1317495	Cf_grCorFumo1|OY7_007781-T1	No match	No match	No match	No match	No match
1908630	1909004	Cf_grCorFumo1|OY7_007956-T1	No match	No match	No match	No match	No match
1909788	1910159	Cf_grCorFumo1|OY7_007957-T1	No match	No match	No match	No match	No match
2168982	2173096	Cf_grCorFumo1|OY7_008029-T1	No match	No match	No match	No match	No match
2174625	2176101	Cf_grCorFumo1|OY7_008030-T1	No match	No match	No match	No match	No match
2176495	2177370	Cf_grCorFumo1|OY7_008031-T1	No match	No match	No match	No match	No match
2338181	2338740	Cf_grCorFumo1|OY7_003043-T1	No match	No match	No match	No match	No match
2338181	2338740	Cf_grCorFumo1|OY7_008078-T1	No match	No match	No match	No match	No match
2338181	2338740	Cf_grCorFumo1|OY7_008121-T1	No match	No match	No match	No match	No match
2341583	2342145	Cf_grCorFumo1|OY7_003045-T1	No match	No match	No match	No match	No match
2341583	2342145	Cf_grCorFumo1|OY7_008080-T1	No match	No match	No match	No match	No match
2341583	2342145	Cf_grCorFumo1|OY7_008123-T1	No match	No match	No match	No match	No match
2599939	2600498	Cf_grCorFumo1|OY7_003043-T1	No match	No match	No match	No match	No match
2599939	2600498	Cf_grCorFumo1|OY7_008078-T1	No match	No match	No match	No match	No match
2599939	2600498	Cf_grCorFumo1|OY7_008121-T1	No match	No match	No match	No match	No match
2603306	2603868	Cf_grCorFumo1|OY7_003045-T1	No match	No match	No match	No match	No match
2603306	2603868	Cf_grCorFumo1|OY7_008080-T1	No match	No match	No match	No match	No match
2603306	2603868	Cf_grCorFumo1|OY7_008123-T1	No match	No match	No match	No match	No match
Chromosome_OY756924.1
2170	2550	Cf_grCorFumo1|OY7_010158-T1	No match	No match	No match	No match	No match
2170	3795	Cf_grCorFumo1|OY7_006452-T1	No match	No match	No match	No match	No match
423889	424383	Cf_grCorFumo1|OY7_006605-T1	No match	No match	No match	No match	No match
424552	425464	Cf_grCorFumo1|OY7_006606-T1	No match	No match	No match	No match	No match
718594	720378	Cf_grCorFumo1|OY7_003065-T1	A0A084B9Z8	Ankyrin repeat domain-containing protein SAT10 (Satratoxin biosynthesis SC1 cluster protein 10)	Stachybotrys chartarum (strain CBS 109288 / IBT 7711) (Toxic black mold) (Stilbospora chartarum)	FUNCTION: Ankyrin repeat domain-containing protein; part of the satratoxin SC1 cluster involved in the biosynthesis of satratoxins, trichothecene mycotoxins that are associated with human food poisonings (PubMed:25015739). Satratoxins are suggested to be made by products of multiple gene clusters (SC1, SC2 and SC3) that encode 21 proteins in all, including polyketide synthases, acetyltransferases…	1930
718594	720378	Cf_grCorFumo1|OY7_006678-T1	A0A084B9Z8	Ankyrin repeat domain-containing protein SAT10 (Satratoxin biosynthesis SC1 cluster protein 10)	Stachybotrys chartarum (strain CBS 109288 / IBT 7711) (Toxic black mold) (Stilbospora chartarum)	FUNCTION: Ankyrin repeat domain-containing protein; part of the satratoxin SC1 cluster involved in the biosynthesis of satratoxins, trichothecene mycotoxins that are associated with human food poisonings (PubMed:25015739). Satratoxins are suggested to be made by products of multiple gene clusters (SC1, SC2 and SC3) that encode 21 proteins in all, including polyketide synthases, acetyltransferases…	1930
1091873	1092310	Cf_grCorFumo1|OY7_006788-T1	No match	No match	No match	No match	No match
1094978	1095646	Cf_grCorFumo1|OY7_006790-T1	No match	No match	No match	No match	No match
1330473	1331152	Cf_grCorFumo1|OY7_006861-T1	No match	No match	No match	No match	No match
1332372	1333175	Cf_grCorFumo1|OY7_006862-T1	No match	No match	No match	No match	No match
2392795	2393265	Cf_grCorFumo1|OY7_007218-T1	No match	No match	No match	No match	No match
2394215	2394802	Cf_grCorFumo1|OY7_007219-T1	No match	No match	No match	No match	No match
Chromosome_OY756922.1
411576	414573	Cf_grCorFumo1|OY7_004444-T1	No match	No match	No match	No match	No match
416063	417797	Cf_grCorFumo1|OY7_004445-T1	No match	No match	No match	No match	No match
2474630	2474872	Cf_grCorFumo1|OY7_005100-T1	No match	No match	No match	No match	No match
2475329	2476816	Cf_grCorFumo1|OY7_005101-T1	No match	No match	No match	No match	No match
Chromosome_OY756923.1
3239277	3240905	Cf_grCorFumo1|OY7_006452-T1	No match	No match	No match	No match	No match
3240525	3240905	Cf_grCorFumo1|OY7_010158-T1	No match	No match	No match	No match	No match
Chromosome_OY756927.1
206155	206934	Cf_grCorFumo1|OY7_008948-T1	Q12556	Copper amine oxidase 1 (EC 1.4.3.22)	Aspergillus niger		671
209039	209276	Cf_grCorFumo1|OY7_008951-T1	No match	No match	No match	No match	No match
1758489	1758854	Cf_grCorFumo1|OY7_009398-T1	No match	No match	No match	No match	No match
1758999	1759560	Cf_grCorFumo1|OY7_009399-T1	No match	No match	No match	No match	No match
Chromosome_OY756926.1
Chromosome_OY756928.1
1606803	1607287	Cf_grCorFumo1|OY7_009986-T1	No match	No match	No match	No match	No match
1609828	1611476	Cf_grCorFumo1|OY7_009988-T1	No match	No match	No match	No match	No match

## Sheet: C.javanica
Chromosome ID			Uniprot Match	Protein Name	Species of match	Function (Uniprot)	Uniprot seq length
Chromosome_CP146855
1286157	1287421	Cj_Apopka97|V2A60_000396-T1	B6Q5I3	Nitrilase (EC 3.5.5.1) (NitPm)	Talaromyces marneffei (strain ATCC 18224 / CBS 334.59 / QM 7333) (Penicillium marneffei)	FUNCTION: Nitrilase that hydrolyzes preferentially 4-cyanopyridine. {ECO:0000269|PubMed:21892598, ECO:0000269|PubMed:23475593}.	322
1288141	1288799	Cj_Apopka97|V2A60_000397-T1	Q5BFG8	Beta-glucosidase B (EC 3.2.1.21) (Beta-D-glucoside glucohydrolase B) (Cellobiase B) (Gentiobiase B)	Emericella nidulans (strain FGSC A4 / ATCC 38163 / CBS 112.46 / NRRL 194 / M139) (Aspergillus nidulans)	FUNCTION: Beta-glucosidases are one of a number of cellulolytic enzymes involved in the degradation of cellulosic biomass. Catalyzes the last step releasing glucose from the inhibitory cellobiose. {ECO:0000269|PubMed:16844780}.	845
1290981	1293073	Cj_Apopka97|V2A60_000400-T1	No match	No match	No match	No match	No match
2372053	2373558	Cj_Apopka97|V2A60_000716-T1	No match	No match	No match	No match	No match
2374565	2375938	Cj_Apopka97|V2A60_000717-T1	P24552	D-amino-acid oxidase (DAAO) (DAMOX) (DAO) (EC 1.4.3.3)	Fusarium vanettenii (Neocosmospora pisi)	FUNCTION: Catalyzes the oxidative deamination of D-amino acids with broad substrate specificity (PubMed:1982443). Enables the organism to utilize D-amino acids as a source of nutrients (By similarity). {ECO:0000250|UniProtKB:Q9HGY3, ECO:0000269|PubMed:1982443}.	361
2430586	2431365	Cj_Apopka97|V2A60_000731-T1	P47173	Uncharacterized protein YJR142W	Saccharomyces cerevisiae (strain ATCC 204508 / S288c) (Baker's yeast)		342
2431878	2433518	Cj_Apopka97|V2A60_000732-T1	No match	No match	No match	No match	No match
7747284	7748540	Cj_Apopka97|V2A60_002358-T1	No match	No match	No match	No match	No match
7747284	7748540	Cj_Apopka97|V2A60_008697-T1	No match	No match	No match	No match	No match
7747284	7748540	Cj_Apopka97|V2A60_008771-T1	No match	No match	No match	No match	No match
7907457	7908671	Cj_Apopka97|V2A60_002415-T1	No match	No match	No match	No match	No match
7913665	7914396	Cj_Apopka97|V2A60_002417-T1	No match	No match	No match	No match	No match
7913665	7914396	Cj_Apopka97|V2A60_008695-T1	No match	No match	No match	No match	No match
7913665	7914396	Cj_Apopka97|V2A60_008773-T1	No match	No match	No match	No match	No match
8028681	8030176	Cj_Apopka97|V2A60_002450-T1	No match	No match	No match	No match	No match
8032109	8032917	Cj_Apopka97|V2A60_002451-T1	No match	No match	No match	No match	No match
8217205	8218778	Cj_Apopka97|V2A60_002508-T1	No match	No match	No match	No match	No match
8223127	8223456	Cj_Apopka97|V2A60_002510-T1	No match	No match	No match	No match	No match
Chromosome_CP146860
794931	795662	Cj_Apopka97|V2A60_002417-T1	No match	No match	No match	No match	No match
794931	795662	Cj_Apopka97|V2A60_008695-T1	No match	No match	No match	No match	No match
794931	795662	Cj_Apopka97|V2A60_008773-T1	No match	No match	No match	No match	No match
800633	801889	Cj_Apopka97|V2A60_002358-T1	No match	No match	No match	No match	No match
800633	801889	Cj_Apopka97|V2A60_008697-T1	No match	No match	No match	No match	No match
800633	801889	Cj_Apopka97|V2A60_008771-T1	No match	No match	No match	No match	No match
1024016	1025272	Cj_Apopka97|V2A60_002358-T1	No match	No match	No match	No match	No match
1024016	1025272	Cj_Apopka97|V2A60_008697-T1	No match	No match	No match	No match	No match
1024016	1025272	Cj_Apopka97|V2A60_008771-T1	No match	No match	No match	No match	No match
1030266	1030997	Cj_Apopka97|V2A60_002417-T1	No match	No match	No match	No match	No match
1030266	1030997	Cj_Apopka97|V2A60_008695-T1	No match	No match	No match	No match	No match
1030266	1030997	Cj_Apopka97|V2A60_008773-T1	No match	No match	No match	No match	No match
1189321	1192852	Cj_Apopka97|V2A60_008814-T1	No match	No match	No match	No match	No match
1196129	1196897	Cj_Apopka97|V2A60_008816-T1	No match	No match	No match	No match	No match
Chromosome_CP146856
596422	597276	Cj_Apopka97|V2A60_002694-T1	No match	No match	No match	No match	No match
600094	600617	Cj_Apopka97|V2A60_002696-T1	No match	No match	No match	No match	No match
959460	973031	Cj_Apopka97|V2A60_002796-T1	Q4WR82	Nonribosomal peptide synthetase sidC (NPRS sidC) (EC 6.3.2.-) (Siderophore peptide synthetase C)	Aspergillus fumigatus (strain ATCC MYA-4609 / CBS 101355 / FGSC A1100 / Af293) (Neosartorya fumigata)	FUNCTION: Nonribosomal peptide synthase; part of the siderophore biosynthetic pathway (PubMed:17845073). Aspergillus fumigatus produces four types of siderophores, low-molecular-mass iron chelators, including excreted fusarinine C (FsC) and triacetylfusarinine C (TAFC) for iron uptake; and intacellular ferricrocin (FC) for hyphal and hydroxyferricrocin (HFC) for conidial iron distribution and sto…	4763
975008	976294	Cj_Apopka97|V2A60_002797-T1	Q52UT1	Acyltransferase ato1 (EC 2.3.1.-) (Ferrichrome A biosynthesis cluster protein ato1)	Omphalotus olearius (Jack o'lantern)	FUNCTION: L-ornithine N(5)-monooxygenase; part of the siderophore biosynthetic pathway (PubMed:16019163). Omphalotus olearius produces ferrichrome A, but no other siderophore has been detected (PubMed:16019163). Ferrichrome A consists of a hexapeptide ring made up of one glycine, two serine, and three N(5)-hydroxyornithine amino acid residues, the latter acylated by trans-(alpha-methyl)-glutaconi…	393
977252	981498	Cj_Apopka97|V2A60_002798-T1	A0A0D1CZ63	Multidrug resistance protein fer6 (ATP-binding cassette sub-family C member fer6) (Fe-regulated protein 6)	Ustilago maydis (strain 521 / FGSC 9021) (Corn smut fungus)	FUNCTION: Multidrug resistance protein; part of the gene cluster that mediates the biosynthesis of siderophore ferrichrome A which is contributing to organismal virulence (PubMed:17138696, Ref.4). {ECO:0000269|PubMed:17138696, ECO:0000269|Ref.4}.	1337
1432528	1433980	Cj_Apopka97|V2A60_002922-T1	O81360	Zeaxanthin epoxidase, chloroplastic (EC 1.14.15.21) (PA-ZE)	Prunus armeniaca (Apricot) (Armeniaca vulgaris)	FUNCTION: Converts zeaxanthin into antheraxanthin and subsequently violaxanthin. Involved in the epoxidation of zeaxanthin. {ECO:0000250}.	661
1435371	1436367	Cj_Apopka97|V2A60_002923-T1	Q6UEH3	Efflux pump aflT (Aflatoxin biosynthesis protein T)	Aspergillus parasiticus (strain ATCC 56775 / NRRL 5862 / SRRC 143 / SU-1)	FUNCTION: Efflux pump; part of the gene cluster that mediates the biosynthesis of aflatoxins (PubMed:15006741, PubMed:15094053). {ECO:0000305|PubMed:15006741, ECO:0000305|PubMed:15094053}.	514
1556534	1557910	Cj_Apopka97|V2A60_002963-T1	P54793	Arylsulfatase F (ASF) (EC 3.1.6.1)	Homo sapiens (Human)	FUNCTION: Exhibits arylsulfatase activity towards the artificial substrate 4-methylumbelliferyl sulfate. {ECO:0000269|PubMed:9192838}.	590
1557987	1559741	Cj_Apopka97|V2A60_002964-T1	No match	No match	No match	No match	No match
5470619	5471245	Cj_Apopka97|V2A60_004146-T1	No match	No match	No match	No match	No match
5472560	5473738	Cj_Apopka97|V2A60_004147-T1	No match	No match	No match	No match	No match
5477714	5478997	Cj_Apopka97|V2A60_004148-T1	No match	No match	No match	No match	No match
5565363	5566008	Cj_Apopka97|V2A60_004181-T1	No match	No match	No match	No match	No match
5566571	5569959	Cj_Apopka97|V2A60_004182-T1	Q5ATG7	Aspyridones efflux protein apdF (Aspyridones biosynthesis protein F)	Emericella nidulans (strain FGSC A4 / ATCC 38163 / CBS 112.46 / NRRL 194 / M139) (Aspergillus nidulans)	FUNCTION: Efflux pump that may be involved in the secretion of aspyridones (PubMed:17369821). {ECO:0000269|PubMed:17369821}.	487
5570826	5571833	Cj_Apopka97|V2A60_004183-T1	A0A024FA41	Fatty acid hydroxylase vlmA (EC 1.-.-.-) (Verlamelin biosynthesis protein A)	Lecanicillium sp	FUNCTION: Fatty acid hydroxylase; part of the gene cluster that mediates the biosynthesis of verlamelin, a lipopeptide that exhibits antifungal activity against plant pathogenic fungi (PubMed:24848421). Verlamelin is a cyclic hexadepsipeptide and is bridged by ester bonding between a 5-hydroxytetradecanoic acid moiety and a carboxyl group on the terminal Val of amide-bonded tetradecanoyl-hexapept…	365
5623823	5625372	Cj_Apopka97|V2A60_004200-T1	No match	No match	No match	No match	No match
5626787	5627433	Cj_Apopka97|V2A60_004201-T1	No match	No match	No match	No match	No match
Chromosome_CP146857
614895	615497	Cj_Apopka97|V2A60_004411-T1	Q9UTS5	Zinc finger protein zas1	Schizosaccharomyces pombe (strain 972 / ATCC 24843) (Fission yeast)		897
615597	617007	Cj_Apopka97|V2A60_004412-T1	Q9UTS5	Zinc finger protein zas1	Schizosaccharomyces pombe (strain 972 / ATCC 24843) (Fission yeast)		897
1049555	1050474	Cj_Apopka97|V2A60_004541-T1	No match	No match	No match	No match	No match
1051188	1055303	Cj_Apopka97|V2A60_004542-T1	D4ALG0	LysM domain-containing protein ARB_05157	Arthroderma benhamiae (strain ATCC MYA-4681 / CBS 112371) (Trichophyton mentagrophytes)	FUNCTION: Might have a role in sequestration of chitin oligosaccharides (breakdown products of fungal cell walls that are released during invasion and act as triggers of host immunity) to dampen host defense. {ECO:0000305|PubMed:19299132}.	458
2679957	2680739	Cj_Apopka97|V2A60_005017-T1	P42769	Glutathione S-transferase PM239X14 (EC 2.5.1.18) (GST class-phi)	Arabidopsis thaliana (Mouse-ear cress)	FUNCTION: Specifically catalyzes the conjugation of synthetic 1-chloro-2,4-ditrobenzene to GSH. Also functions as a glutathione peroxidase, converting linoleate oxidation products into their corresponding hydroxyacids. This enzyme may thus serve to protect the cell from oxygen toxicity as well as from exogenous toxins such as herbicides. {ECO:0000269|PubMed:8375395}.	218
2681184	2682480	Cj_Apopka97|V2A60_005018-T1	C8V3N0	Aspercryptin biosynthesis cluster-specific transcription regulator atnN (Aspercryptin biosynthesis cluster protein N)	Emericella nidulans (strain FGSC A4 / ATCC 38163 / CBS 112.46 / NRRL 194 / M139) (Aspergillus nidulans)	FUNCTION: Transcription factor that positively regulates the cluster that mediate the production of aspercryptins, linear lipopeptides built from six amino acids including 2 highly unusual and nonproteogenic amino acids, 2-amino-octanoic acid (2aoa) and 2-amino-dodecanol (2adol) (PubMed:27310134, PubMed:26563584). {ECO:0000269|PubMed:27310134, ECO:0000305|PubMed:26563584}.	610
5031932	5033592	Cj_Apopka97|V2A60_005700-T1	No match	No match	No match	No match	No match
5034768	5037532	Cj_Apopka97|V2A60_005701-T1	P28737	Outer mitochondrial transmembrane helix translocase (EC 7.4.2.-) (Mitochondrial sorting of proteins) (Tat-binding homolog 4)	Saccharomyces cerevisiae (strain ATCC 204508 / S288c) (Baker's yeast)	FUNCTION: Outer mitochondrial translocase required to remove mislocalized tail-anchored transmembrane proteins on mitochondria (PubMed:24843043, PubMed:24821790, PubMed:28906250, PubMed:30858337, PubMed:31445887, PubMed:28712723). Specifically recognizes and binds exposed hydrophobic surfaces of mistargeted tail-anchored transmembrane proteins (PubMed:30858337). Acts as a dislocase that mediates …	362
5599930	5600142	Cj_Apopka97|V2A60_005884-T1	No match	No match	No match	No match	No match
5603573	5604462	Cj_Apopka97|V2A60_005886-T1	No match	No match	No match	No match	No match
5606726	5608325	Cj_Apopka97|V2A60_005887-T1	No match	No match	No match	No match	No match
5612403	5613665	Cj_Apopka97|V2A60_005889-T1	No match	No match	No match	No match	No match
Chromosome_CP146858
Chromosome_CP146859
2564804	2565452	Cj_Apopka97|V2A60_008010-T1	No match	No match	No match	No match	No match
2565954	2567630	Cj_Apopka97|V2A60_008011-T1	Q2U100	Mannitol 2-dehydrogenase (M2DH) (MDH) (EC 1.1.1.67)	Aspergillus oryzae (strain ATCC 42149 / RIB 40) (Yellow koji mold)	FUNCTION: Catalyzes the NAD(H)-dependent interconversion of D-fructose and D-mannitol in the mannitol metabolic pathway. {ECO:0000250}.	502
2569254	2570084	Cj_Apopka97|V2A60_008012-T1	No match	No match	No match	No match	No match
3081410	3082435	Cj_Apopka97|V2A60_008146-T1	No match	No match	No match	No match	No match
3083084	3084233	Cj_Apopka97|V2A60_008147-T1	No match	No match	No match	No match	No match
3086797	3089522	Cj_Apopka97|V2A60_008149-T1	Q0CXB1	Probable dipeptidyl-aminopeptidase B (DPAP B) (EC 3.4.14.5)	Aspergillus terreus (strain NIH 2624 / FGSC A1156)	FUNCTION: Type IV dipeptidyl-peptidase which removes N-terminal dipeptides sequentially from polypeptides having unsubstituted N-termini provided that the penultimate residue is proline. {ECO:0000250}.	914
3090433	3092111	Cj_Apopka97|V2A60_008150-T1	B8MYS8	Probable efflux pump mfs2 (Asparasone A synthesis protein mfs2)	Aspergillus flavus (strain ATCC 200026 / FGSC A1120 / IAM 13836 / NRRL 3357 / JCM 12722 / SRRC 167)	FUNCTION: Probable efflux pump; part of the gene cluster 27 that mediates the biosynthesis of asparasone A, a sclerotium-specific anthraquinone pigment important for sclerotial survival (PubMed:24412484). {ECO:0000269|PubMed:24412484}.	423
3093174	3094552	Cj_Apopka97|V2A60_008151-T1	No match	No match	No match	No match	No match
3815067	3815330	Cj_Apopka97|V2A60_008382-T1	No match	No match	No match	No match	No match
3815607	3816047	Cj_Apopka97|V2A60_008383-T1	No match	No match	No match	No match	No match
Chromosome_CP146861
404305	405062	Cj_Apopka97|V2A60_009646-T1	No match	No match	No match	No match	No match
405176	405518	Cj_Apopka97|V2A60_009647-T1	No match	No match	No match	No match	No match
1020401	1021628	Cj_Apopka97|V2A60_009824-T1	Q55AR8	U5 small nuclear ribonucleoprotein 40 kDa protein (U5 snRNP 40 kDa protein) (WD repeat-containing protein 57 homolog)	Dictyostelium discoideum (Social amoeba)	FUNCTION: Required for pre-mRNA splicing as component of the activated spliceosome. Component of the U5 small nuclear ribonucleoprotein (snRNP) complex and the U4/U6-U5 tri-snRNP complex, building blocks of the spliceosome. {ECO:0000250|UniProtKB:Q96DI7}.	355
1023273	1024412	Cj_Apopka97|V2A60_009825-T1	No match	No match	No match	No match	No match
1167906	1168301	Cj_Apopka97|V2A60_009863-T1	No match	No match	No match	No match	No match
1170174	1171714	Cj_Apopka97|V2A60_009864-T1	No match	No match	No match	No match	No match
2613382	2614887	Cj_Apopka97|V2A60_010278-T1	No match	No match	No match	No match	No match
2619831	2621369	Cj_Apopka97|V2A60_010280-T1	Q9JJA4	Ribosome biogenesis protein WDR12 (WD repeat-containing protein 12)	Mus musculus (Mouse)	FUNCTION: Component of the PeBoW complex, which is required for maturation of 28S and 5.8S ribosomal RNAs and formation of the 60S ribosome. {ECO:0000255|HAMAP-Rule:MF_03029}.	423
2846833	2848215	Cj_Apopka97|V2A60_010348-T1	No match	No match	No match	No match	No match
2851461	2851877	Cj_Apopka97|V2A60_010349-T1	No match	No match	No match	No match	No match

## Sheet: C.militaris
Chromosome ID			Uniprot Match	Protein Name	Species of match	Function (Uniprot)	Uniprot seq length
Chromosome_CP023322.1
4722075	4722546	Cm_34164|ATY59739.1	No match	No match	No match	No match	No match
4725027	4725406	Cm_34164|ATY58488.1	No match	No match	No match	No match	No match
4726191	4726969	Cm_34164|ATY58489.1	No match	No match	No match	No match	No match
4993375	4994492	Cm_34164|ATY59345.1	B8NM67	Oxidase ustYa (EC 1.-.-.-) (Ustiloxin B biosynthesis protein Ya)	Aspergillus flavus (strain ATCC 200026 / FGSC A1120 / IAM 13836 / NRRL 3357 / JCM 12722 / SRRC 167)	FUNCTION: Oxidase; part of the gene cluster that mediates the biosynthesis of the secondary metabolite ustiloxin B, an antimitotic tetrapeptide (PubMed:24841822, PubMed:27166860, PubMed:26703898). First, ustA is processed by the subtilisin-like endoprotease Kex2 that is outside the ustiloxin B gene cluster, at the C-terminal side of Arg-Lys, after transfer to Golgi apparatus through the endoplasm…	213
4995520	4996565	Cm_34164|ATY58926.1	No match	No match	No match	No match	No match
4997359	4997809	Cm_34164|ATY58925.1	No match	No match	No match	No match	No match
5153542	5155087	Cm_34164|ATY58808.1	P40971	Lysine biosynthesis regulatory protein LYS14	Saccharomyces cerevisiae (strain ATCC 204508 / S288c) (Baker's yeast)	FUNCTION: Activates the transcription of lysine biosynthesis genes. This activation is dependent on the inducer alpha-aminoadipate semialdehyde and repressed by lysine.	790
5157343	5158482	Cm_34164|ATY58807.1	Q10494	Uncharacterized oxidoreductase C26F1.07 (EC 1.-.-.-)	Schizosaccharomyces pombe (strain 972 / ATCC 24843) (Fission yeast)		321
Chromosome_CP023323.1
214264	214566	Cm_34164|ATY59962.1	No match	No match	No match	No match	No match
215366	216288	Cm_34164|ATY61167.1	No match	No match	No match	No match	No match
2023585	2024086	Cm_34164|ATY60521.1	No match	No match	No match	No match	No match
2025183	2025862	Cm_34164|ATY60520.1	No match	No match	No match	No match	No match
2026488	2027069	Cm_34164|ATY61244.1	No match	No match	No match	No match	No match
2035725	2037396	Cm_34164|ATY61246.1	No match	No match	No match	No match	No match
2037540	2041372	Cm_34164|ATY61247.1	No match	No match	No match	No match	No match
2041500	2043802	Cm_34164|ATY61240.1	No match	No match	No match	No match	No match
2043973	2044610	Cm_34164|ATY61241.1	No match	No match	No match	No match	No match
2045474	2046978	Cm_34164|ATY61242.1	No match	No match	No match	No match	No match
2105209	2105921	Cm_34164|ATY61190.1	No match	No match	No match	No match	No match
2106044	2106427	Cm_34164|ATY61191.1	No match	No match	No match	No match	No match
2619694	2620043	Cm_34164|ATY60800.1	No match	No match	No match	No match	No match
2620333	2621052	Cm_34164|ATY60803.1	No match	No match	No match	No match	No match
2981111	2981912	Cm_34164|ATY60173.1	No match	No match	No match	No match	No match
2982779	2983409	Cm_34164|ATY60172.1	No match	No match	No match	No match	No match
3086623	3086895	Cm_34164|ATY60343.1	No match	No match	No match	No match	No match
3086929	3088615	Cm_34164|ATY60344.1	No match	No match	No match	No match	No match
3295570	3295807	Cm_34164|ATY59900.1	No match	No match	No match	No match	No match
3295998	3296861	Cm_34164|ATY59901.1	No match	No match	No match	No match	No match
4418393	4419048	Cm_34164|ATY61141.1	No match	No match	No match	No match	No match
4419292	4419673	Cm_34164|ATY60977.1	No match	No match	No match	No match	No match
4500014	4500886	Cm_34164|ATY60678.1	No match	No match	No match	No match	No match
4501905	4503158	Cm_34164|ATY60677.1	No match	No match	No match	No match	No match
5324843	5326710	Cm_34164|ATY60071.1	O74308	Uncharacterized transcriptional regulatory protein C15D4.02	Schizosaccharomyces pombe (strain 972 / ATCC 24843) (Fission yeast)		547
5328372	5329695	Cm_34164|ATY60067.1	No match	No match	No match	No match	No match
5426961	5427307	Cm_34164|ATY61127.1	No match	No match	No match	No match	No match
5427312	5428867	Cm_34164|ATY61124.1	No match	No match	No match	No match	No match
5554956	5555686	Cm_34164|ATY61032.1	No match	No match	No match	No match	No match
5558640	5559063	Cm_34164|ATY59916.1	No match	No match	No match	No match	No match
5839202	5840972	Cm_34164|ATY61343.1	Q9HE12	Putative purine permease C1399.01c	Schizosaccharomyces pombe (strain 972 / ATCC 24843) (Fission yeast)		601
5841511	5843035	Cm_34164|ATY61346.1	Q92342	Uncharacterized protein C1F8.04c	Schizosaccharomyces pombe (strain 972 / ATCC 24843) (Fission yeast)		463
Chromosome_CP023324.1
532083	532706	Cm_34164|ATY62363.1	A0A1U8QYH7	Efflux pump alnA (Asperlin biosynthesis cluster protein E)	Emericella nidulans (strain FGSC A4 / ATCC 38163 / CBS 112.46 / NRRL 194 / M139) (Aspergillus nidulans)	FUNCTION: Efflux pump; part of the gene cluster that mediates the biosynthesis of asperlin, a polyketide showing anti-inflammatory, antitumor and antibiotic activities (PubMed:30339758). Is probably involved in the efflux of asperlin (Probable). {ECO:0000269|PubMed:30339758, ECO:0000305|PubMed:30339758}.	553
536008	536277	Cm_34164|ATY62369.1	No match	No match	No match	No match	No match
628614	628950	Cm_34164|ATY62260.1	No match	No match	No match	No match	No match
631593	631931	Cm_34164|ATY62439.1	No match	No match	No match	No match	No match
4777630	4779209	Cm_34164|ATY63625.1	No match	No match	No match	No match	No match
4779310	4779984	Cm_34164|ATY63624.1	No match	No match	No match	No match	No match
5862395	5862654	Cm_34164|ATY63576.1	No match	No match	No match	No match	No match
5863382	5864484	Cm_34164|ATY63577.1	No match	No match	No match	No match	No match
7239839	7240974	Cm_34164|ATY63423.1	No match	No match	No match	No match	No match
7245015	7246109	Cm_34164|ATY63425.1	No match	No match	No match	No match	No match
Chromosome_CP023325.1
253834	255272	Cm_34164|ATY64256.1	Q9UTM9	L-saccharopine oxidase (EC 1.5.3.18)	Schizosaccharomyces pombe (strain 972 / ATCC 24843) (Fission yeast)		433
257704	259620	Cm_34164|ATY64255.1	No match	No match	No match	No match	No match
709571	711378	Cm_34164|ATY63842.1	No match	No match	No match	No match	No match
711998	712257	Cm_34164|ATY63843.1	No match	No match	No match	No match	No match
714195	714508	Cm_34164|ATY63848.1	No match	No match	No match	No match	No match
775292	777234	Cm_34164|ATY63821.1	No match	No match	No match	No match	No match
778970	779276	Cm_34164|ATY63816.1	No match	No match	No match	No match	No match
782122	782518	Cm_34164|ATY64426.1	No match	No match	No match	No match	No match
804961	805370	Cm_34164|ATY64417.1	No match	No match	No match	No match	No match
809086	810398	Cm_34164|ATY64568.1	No match	No match	No match	No match	No match
999581	999964	Cm_34164|ATY64040.1	No match	No match	No match	No match	No match
1001824	1002434	Cm_34164|ATY64039.1	No match	No match	No match	No match	No match
1707816	1710478	Cm_34164|ATY65134.1	No match	No match (Cordycepin)	No match	No match	No match
1711740	1712777	Cm_34164|ATY65129.1	O05502	Uncharacterized protein YdhJ (Cordycepin)	Bacillus subtilis (strain 168)		325
1714634	1717012	Cm_34164|ATY65128.1	No match	No match (Cordycepin)	No match	No match	No match
1848245	1848930	Cm_34164|ATY65239.1	No match	No match	No match	No match	No match
1849743	1850461	Cm_34164|ATY65238.1	No match	No match	No match	No match	No match
1987535	1988006	Cm_34164|ATY64320.1	No match	No match	No match	No match	No match
1989846	1990747	Cm_34164|ATY65297.1	No match	No match	No match	No match	No match
1993175	1994622	Cm_34164|ATY65296.1	No match	No match	No match	No match	No match
1998986	1999861	Cm_34164|ATY65295.1	No match	No match	No match	No match	No match
2593500	2594576	Cm_34164|ATY64168.1	No match	No match	No match	No match	No match
2595923	2597953	Cm_34164|ATY64167.1	No match	No match	No match	No match	No match
2820656	2821445	Cm_34164|ATY65031.1	No match	No match	No match	No match	No match
2822005	2822398	Cm_34164|ATY65025.1	No match	No match	No match	No match	No match
2881172	2881815	Cm_34164|ATY65060.1	No match	No match	No match	No match	No match
2883182	2883467	Cm_34164|ATY65061.1	No match	No match	No match	No match	No match
2883531	2883921	Cm_34164|ATY65058.1	No match	No match	No match	No match	No match
3503597	3503958	Cm_34164|ATY65056.1	No match	No match	No match	No match	No match
3506374	3507671	Cm_34164|ATY64108.1	No match	No match	No match	No match	No match
4231761	4232084	Cm_34164|ATY64075.1	No match	No match	No match	No match	No match
4233553	4234595	Cm_34164|ATY64096.1	No match	No match	No match	No match	No match
Chromosome_CP023326.1
704150	704460	Cm_34164|ATY65587.1	No match	No match	No match	No match	No match
707197	707634	Cm_34164|ATY65588.1	No match	No match	No match	No match	No match
1121074	1121503	Cm_34164|ATY65493.1	No match	No match	No match	No match	No match
1124336	1125331	Cm_34164|ATY65730.1	No match	No match	No match	No match	No match
1132532	1133466	Cm_34164|ATY66252.1	No match	No match	No match	No match	No match
1137811	1138200	Cm_34164|ATY65372.1	No match	No match	No match	No match	No match
1164016	1164311	Cm_34164|ATY65687.1	No match	No match	No match	No match	No match
1165329	1165876	Cm_34164|ATY65688.1	No match	No match	No match	No match	No match
1225792	1226147	Cm_34164|ATY65658.1	No match	No match	No match	No match	No match
1226263	1227327	Cm_34164|ATY65659.1	No match	No match	No match	No match	No match
1227352	1227782	Cm_34164|ATY65656.1	No match	No match	No match	No match	No match
1399047	1399320	Cm_34164|ATY65391.1	No match	No match	No match	No match	No match
1403591	1404144	Cm_34164|ATY65389.1	No match	No match	No match	No match	No match
1405161	1406246	Cm_34164|ATY65390.1	No match	No match	No match	No match	No match
1408755	1409029	Cm_34164|ATY65394.1	No match	No match	No match	No match	No match
1767325	1769137	Cm_34164|ATY65621.1	P51977	Aldehyde dehydrogenase 1A1 (EC 1.2.1.19) (EC 1.2.1.28) (EC 1.2.1.3) (EC 1.2.1.36) (3-deoxyglucosone dehydrogenase) (ALDH-E1) (ALHDII) (Aldehyde dehydrogenase family 1 member A1) (Aldehyde dehydrogenase, cytosolic) (Retinal dehydrogenase 1) (RALDH 1) (RalDH1)	Ovis aries (Sheep)	FUNCTION: Cytosolic dehydrogenase that catalyzes the irreversible oxidation of a wide range of aldehydes to their corresponding carboxylic acid (PubMed:26373694). Functions downstream of retinol dehydrogenases and catalyzes the oxidation of retinaldehyde into retinoic acid, the second step in the oxidation of retinol/vitamin A into retinoic acid. This pathway is crucial to control the levels of r…	501
1769952	1771336	Cm_34164|ATY65614.1	P07754	Alcohol dehydrogenase 3 (EC 1.1.1.1) (Alcohol dehydrogenase III) (ADH III)	Emericella nidulans (strain FGSC A4 / ATCC 38163 / CBS 112.46 / NRRL 194 / M139) (Aspergillus nidulans)		352
2326301	2326865	Cm_34164|ATY65754.1	No match	No match	No match	No match	No match
2327060	2327607	Cm_34164|ATY65757.1	No match	No match	No match	No match	No match
Chromosome_CP023327.1
697794	699414	Cm_34164|ATY66446.1	No match	No match	No match	No match	No match
700170	703693	Cm_34164|ATY66734.1	No match	No match	No match	No match	No match
1122257	1122729	Cm_34164|ATY66698.1	No match	No match	No match	No match	No match
1124233	1124973	Cm_34164|ATY66697.1	No match	No match	No match	No match	No match
1275384	1275685	Cm_34164|ATY66666.1	No match	No match	No match	No match	No match
1276894	1277612	Cm_34164|ATY66863.1	No match	No match	No match	No match	No match
1278052	1278535	Cm_34164|ATY66862.1	No match	No match	No match	No match	No match
1958965	1959391	Cm_34164|ATY66379.1	No match	No match	No match	No match	No match
1962023	1963188	Cm_34164|ATY66378.1	No match	No match	No match	No match	No match
2044971	2046942	Cm_34164|ATY66991.1	No match	No match	No match	No match	No match
2050252	2050598	Cm_34164|ATY66990.1	No match	No match	No match	No match	No match
2050687	2051226	Cm_34164|ATY66989.1	No match	No match	No match	No match	No match
2053496	2054148	Cm_34164|ATY66688.1	No match	No match	No match	No match	No match
2054945	2055183	Cm_34164|ATY66689.1	No match	No match	No match	No match	No match
2055921	2056300	Cm_34164|ATY66690.1	No match	No match	No match	No match	No match
2056391	2057208	Cm_34164|ATY66691.1	No match	No match	No match	No match	No match
Chromosome_CP023328.1
919500	921426	Cm_34164|ATY67311.1	No match	No match	No match	No match	No match
923031	923365	Cm_34164|ATY67207.1	No match	No match	No match	No match	No match

## Sheet: E.festucae
Chromosome ID			Uniprot Match	Protein Name	Species of match	Function (Uniprot)	Uniprot seq length
Chromosome_CP031385.1
44454	47708	Ef_Fl1|QPG93466.1	No match	No match	No match	No match	No match
48877	50188	Ef_Fl1|QPG93467.1	No match	No match	No match	No match	No match
50592	51747	Ef_Fl1|QPG93468.1	No match	No match	No match	No match	No match
302642	304381	Ef_Fl1|QPG93512.1	No match	No match	No match	No match	No match
308729	310001	Ef_Fl1|QPG93513.1	No match	No match	No match	No match	No match
814955	815575	Ef_Fl1|QPG93592.1	No match	No match	No match	No match	No match
817531	818663	Ef_Fl1|QPG93593.1	No match	No match	No match	No match	No match
1820274	1821488	Ef_Fl1|QPG93802.1	No match	No match	No match	No match	No match
1823354	1824379	Ef_Fl1|QPG93803.1	No match	No match	No match	No match	No match
2961403	2961903	Ef_Fl1|QPG94094.1	No match	No match	No match	No match	No match
2963212	2963562	Ef_Fl1|QPG94095.1	No match	No match	No match	No match	No match
4139790	4141039	Ef_Fl1|QPG94389.1	No match	No match	No match	No match	No match
4141714	4141968	Ef_Fl1|QPG94390.1	No match	No match	No match	No match	No match
4415633	4416128	Ef_Fl1|QPG94430.1	No match	No match	No match	No match	No match
4416265	4417021	Ef_Fl1|QPG94431.1	No match	No match	No match	No match	No match
4418886	4419356	Ef_Fl1|QPG94433.1	No match	No match	No match	No match	No match
4863861	4864341	Ef_Fl1|QPG94561.1	No match	No match	No match	No match	No match
4866798	4867379	Ef_Fl1|QPG94562.1	No match	No match	No match	No match	No match
4916956	4917613	Ef_Fl1|QPG94584.1	D4B1P2	Uncharacterized FAD-linked oxidoreductase ARB_02372 (EC 1.-.-.-)	Arthroderma benhamiae (strain ATCC MYA-4681 / CBS 112371) (Trichophyton mentagrophytes)		500
4919775	4920586	Ef_Fl1|QPG94585.1	A0A084R1M7	Cytochrome P450 monooxygenase ATR4 (EC 1.-.-.-) (Core atranone cluster (CAC) protein 4)	Stachybotrys chlorohalonata (strain IBT 40285)	FUNCTION: Cytochrome P450 monooxygenase; part of the core atranone cluster (CAC) which products are predicted to catalyze most or all steps of mycotoxin atranone synthesis, starting from geranylgeranyl pyrophosphate (GGPP) (PubMed:25015739). The initial cyclization of GGPP to dolabellane is probably performed by the terpene cyclase ATR13 (PubMed:25015739). The Baeyer-Villiger oxidation near the e…	524
5237722	5241591	Ef_Fl1|QPG94657.1	No match	No match	No match	No match	No match
5241823	5244905	Ef_Fl1|QPG94658.1	No match	No match	No match	No match	No match
5552642	5553627	Ef_Fl1|QPG94733.1	No match	No match	No match	No match	No match
5554521	5555578	Ef_Fl1|QPG94734.1	No match	No match	No match	No match	No match
6324570	6326644	Ef_Fl1|QPG94932.1	No match	No match	No match	No match	No match
6327664	6328731	Ef_Fl1|QPG94933.1	No match	No match	No match	No match	No match
7714053	7716155	Ef_Fl1|QPG95265.1	O94556	Anaphase-promoting complex subunit 8 (20S cyclosome/APC complex protein apc8) (Cell untimely torn protein 23)	Schizosaccharomyces pombe (strain 972 / ATCC 24843) (Fission yeast)	FUNCTION: Component of the anaphase-promoting complex/cyclosome (APC/C), a cell cycle-regulated E3 ubiquitin-protein ligase complex that controls progression through mitosis and the G1 phase of the cell cycle. The APC/C is thought to confer substrate specificity and, in the presence of ubiquitin-conjugating E2 enzymes, it catalyzes the formation of protein-ubiquitin conjugates that are subsequent…	565
7718188	7719996	Ef_Fl1|QPG95267.1	No match	No match	No match	No match	No match
7722978	7723673	Ef_Fl1|QPG95269.1	No match	No match	No match	No match	No match
7725371	7725933	Ef_Fl1|QPG95270.1	No match	No match	No match	No match	No match
Chromosome_CP031386.1
202395	202684	Ef_Fl1|QPG95357.1	No match	No match	No match	No match	No match
204263	204733	Ef_Fl1|QPG95358.1	No match	No match	No match	No match	No match
207715	208058	Ef_Fl1|QPG95359.1	No match	No match	No match	No match	No match
209066	209545	Ef_Fl1|QPG95360.1	No match	No match	No match	No match	No match
210289	211004	Ef_Fl1|QPG95361.1	No match	No match	No match	No match	No match
1100559	1101299	Ef_Fl1|QPG95639.1	No match	No match	No match	No match	No match
1103156	1104607	Ef_Fl1|QPG95641.1	S0DS17	Cytochrome P450 monooxygenase apf8 (EC 1.-.-.-) (Apicidin F synthesis protein 8)	Gibberella fujikuroi (strain CBS 195.34 / IMI 58289 / NRRL A-6831) (Bakanae and foot rot disease fungus) (Fusarium fujikuroi)	FUNCTION: Cytochrome P450 monooxygenase; part of the gene cluster that mediates the biosynthesis of the cyclic tetrapeptide apicidin F (APF) (PubMed:25058475). The non-ribosomal peptide synthetase apf1 incorporates four different amino acids to produce apicidin F: L-phenylalanine, D-pipecolic acid (D-pip), N-methoxy-L-tryptophan and L-2-aminooctanedioic acid (PubMed:25058475). L-Phenylalanine is …	369
2723086	2723534	Ef_Fl1|QPG96440.1	No match	No match	No match	No match	No match
2726111	2726825	Ef_Fl1|QPG96443.1	No match	No match	No match	No match	No match
4578210	4579708	Ef_Fl1|QPG97343.1	Q02953	Heat shock factor protein (HSF) (Heat shock transcription factor) (HSTF)	Schizosaccharomyces pombe (strain 972 / ATCC 24843) (Fission yeast)	FUNCTION: DNA-binding protein that specifically binds heat shock promoter elements (HSE) and activates transcription. Also required for growth at normal temperatures.	609
4584552	4584932	Ef_Fl1|QPG97347.1	No match	No match	No match	No match	No match
5319462	5322357	Ef_Fl1|QPG97661.1	No match	No match	No match	No match	No match
5325599	5326435	Ef_Fl1|QPG97663.1	No match	No match	No match	No match	No match
5400188	5401015	Ef_Fl1|QPG97695.1	No match	No match	No match	No match	No match
5402360	5403031	Ef_Fl1|QPG97697.1	No match	No match	No match	No match	No match
5406368	5407350	Ef_Fl1|QPG97700.1	No match	No match	No match	No match	No match
5505792	5506441	Ef_Fl1|QPG97761.1	No match	No match	No match	No match	No match
5506651	5507458	Ef_Fl1|QPG97762.1	No match	No match	No match	No match	No match
5639110	5639651	Ef_Fl1|QPG97838.1	No match	No match	No match	No match	No match
5640735	5641132	Ef_Fl1|QPG97840.1	No match	No match	No match	No match	No match
7590184	7590406	Ef_Fl1|QPG98721.1	No match	No match	No match	No match	No match
7590852	7593236	Ef_Fl1|QPG98722.1	No match	No match	No match	No match	No match
Chromosome_CP031387.1
2336494	2337039	Ef_Fl1|QPH00270.1	No match	No match	No match	No match	No match
2337911	2338735	Ef_Fl1|QPH00272.1	No match	No match	No match	No match	No match
2545373	2545717	Ef_Fl1|QPH00414.1	No match	No match	No match	No match	No match
2547422	2548718	Ef_Fl1|QPH00415.1	No match	No match	No match	No match	No match
5505749	5506083	Ef_Fl1|QPH02613.1	No match	No match	No match	No match	No match
5506850	5507276	Ef_Fl1|QPH02616.1	No match	No match	No match	No match	No match
Chromosome_CP031388.1
4231	6126	Ef_Fl1|QPH03705.1	No match	No match	No match	No match	No match
7422	9915	Ef_Fl1|QPH03707.1	No match	No match	No match	No match	No match
99608	100018	Ef_Fl1|QPH03760.1	No match	No match	No match	No match	No match
101050	103270	Ef_Fl1|QPH03761.1	No match	No match	No match	No match	No match
1551113	1551496	Ef_Fl1|QPH04962.1	No match	No match	No match	No match	No match
1552173	1552501	Ef_Fl1|QPH04964.1	No match	No match	No match	No match	No match
2281821	2282661	Ef_Fl1|QPH05635.1	No match	No match	No match	No match	No match
2286753	2287469	Ef_Fl1|QPH05638.1	P38331	5'-deoxynucleotidase YBR242W (EC 3.1.3.89)	Saccharomyces cerevisiae (strain ATCC 204508 / S288c) (Baker's yeast)	FUNCTION: Catalyzes the dephosphorylation of the nucleoside 5'-monophosphates deoxyadenosine monophosphate (dAMP), deoxycytidine monophosphate (dCMP), deoxyguanosine monophosphate (dGMP) and deoxythymidine monophosphate (dTMP). {ECO:0000269|PubMed:29752939}.	238
2291447	2292043	Ef_Fl1|QPH05644.1	Q6A3P9	Urease (EC 3.5.1.5) (Urea amidohydrolase)	Aspergillus fumigatus (strain ATCC MYA-4609 / CBS 101355 / FGSC A1100 / Af293) (Neosartorya fumigata)		838
2392303	2392698	Ef_Fl1|QPH05762.1	No match	No match	No match	No match	No match
2392459	2392698	Ef_Fl1|QPH05773.1	No match	No match	No match	No match	No match
2392459	2392698	Ef_Fl1|QPH05782.1	No match	No match	No match	No match	No match
2401379	2401774	Ef_Fl1|QPH05762.1	No match	No match	No match	No match	No match
2401535	2401774	Ef_Fl1|QPH05773.1	No match	No match	No match	No match	No match
2401535	2401774	Ef_Fl1|QPH05782.1	No match	No match	No match	No match	No match
2404506	2404969	Ef_Fl1|QPH05776.1	Q06235	Protein YLR162W	Saccharomyces cerevisiae (strain ATCC 204508 / S288c) (Baker's yeast)	FUNCTION: Overexpression confers resistance to the antimicrobial peptide MiAMP1. {ECO:0000269|PubMed:15700139}.	118
2410230	2410625	Ef_Fl1|QPH05762.1	No match	No match	No match	No match	No match
2410386	2410625	Ef_Fl1|QPH05773.1	No match	No match	No match	No match	No match
2410386	2410625	Ef_Fl1|QPH05782.1	No match	No match	No match	No match	No match
3238709	3239679	Ef_Fl1|QPH06542.1	No match	No match	No match	No match	No match
3240968	3241581	Ef_Fl1|QPH06546.1	No match	No match	No match	No match	No match
Chromosome_CP031389.1
1363607	1364737	Ef_Fl1|QPH10649.1	No match	No match	No match	No match	No match
1369174	1369442	Ef_Fl1|QPH10655.1	No match	No match	No match	No match	No match
2144435	2146576	Ef_Fl1|QPH11538.1	No match	No match	No match	No match	No match
2146787	2148284	Ef_Fl1|QPH11542.1	Q25337	NAD-dependent protein deacetylase SIR2rp1 (EC 2.3.1.286) (Regulatory protein SIR2 homolog 1) (SIR2-related protein 1)	Leishmania major	FUNCTION: NAD-dependent deacetylase, which probably acts as a regulator of gene expression believed to help form modified chromatin structures on the genes it regulates. {ECO:0000250}.	373
2946735	2947184	Ef_Fl1|QPH12405.1	No match	No match	No match	No match	No match
2947357	2947954	Ef_Fl1|QPH12406.1	No match	No match	No match	No match	No match
2951599	2952685	Ef_Fl1|QPH12413.1	No match	No match	No match	No match	No match
2991334	2992080	Ef_Fl1|QPH12456.1	No match	No match	No match	No match	No match
2995866	2996585	Ef_Fl1|QPH12463.1	No match	No match	No match	No match	No match
Chromosome_CP031390.1
15908	18008	Ef_Fl1|QPH15581.1	No match	No match	No match	No match	No match
18540	18746	Ef_Fl1|QPH15583.1	No match	No match	No match	No match	No match
388599	391963	Ef_Fl1|QPH15962.1	No match	No match	No match	No match	No match
394830	395300	Ef_Fl1|QPH15967.1	No match	No match	No match	No match	No match
1740463	1741329	Ef_Fl1|QPH17739.1	No match	No match	No match	No match	No match
1741962	1742637	Ef_Fl1|QPH17740.1	No match	No match	No match	No match	No match
1846635	1847207	Ef_Fl1|QPH17861.1	Q12545	3-isopropylmalate dehydrogenase (3-IPM-DH) (IMDH) (EC 1.1.1.85) (Beta-IPM dehydrogenase)	Hapsidospora chrysogena (Acremonium chrysogenum)	FUNCTION: Catalyzes the oxidation of 3-carboxy-2-hydroxy-4-methylpentanoate (3-isopropylmalate) to 3-carboxy-4-methyl-2-oxopentanoate. The product decarboxylates to 4-methyl-2 oxopentanoate.	380
1847270	1847710	Ef_Fl1|QPH17862.1	Q12545	3-isopropylmalate dehydrogenase (3-IPM-DH) (IMDH) (EC 1.1.1.85) (Beta-IPM dehydrogenase)	Hapsidospora chrysogena (Acremonium chrysogenum)	FUNCTION: Catalyzes the oxidation of 3-carboxy-2-hydroxy-4-methylpentanoate (3-isopropylmalate) to 3-carboxy-4-methyl-2-oxopentanoate. The product decarboxylates to 4-methyl-2 oxopentanoate.	380
2073813	2076308	Ef_Fl1|QPH18181.1	No match	No match	No match	No match	No match
2078716	2079120	Ef_Fl1|QPH18190.1	No match	No match	No match	No match	No match
3326666	3329351	Ef_Fl1|QPH19898.1	No match	No match	No match	No match	No match
3332371	3332774	Ef_Fl1|QPH19906.1	No match	No match	No match	No match	No match

## Sheet: M.brunneum
Chromosome ID			Uniprot Match	Protein Name	Species of match	Function (Uniprot)	Uniprot seq length
Chromosome_CP058932.1
17358	18439	Mb_4556|QLI66223.1	No match	No match	No match	No match	No match
23268	24041	Mb_4556|QLI63539.1	G0R6S9	Non-reducing polyketide synthase sor2 (NR-PKS sor2) (EC 2.3.1.-) (Sorbicillinoid biosynthetic cluster protein 2)	Hypocrea jecorina (strain QM6a) (Trichoderma reesei)	FUNCTION: Non-reducing polyketide synthase; part of the SOR gene cluster that mediates the biosynthesis of sorbicillinoids, a diverse group of yellow secondary metabolites that restrict growth of competing pathogenic fungi but not of bacteria (PubMed:29104566). Sorbicillinoids biosynthesis requires the action of two PKSs (PubMed:28809958). The SOR cluster is required for the production of trichod…	2633
125831	126628	Mb_4556|QLI65933.1	No match	No match	No match	No match	No match
128101	132765	Mb_4556|QLI64504.1	Q4WY82	Linoleate 10R-lipoxygenase (EC 1.13.11.62) (Cyclooxygenase-like fatty acid oxygenase) (Fatty acid oxygenase ppoC) (Linoleate 10R-dioxygenase) (10R-DOX) (Psi-producing oxygenase C) (AfPpoC)	Aspergillus fumigatus (strain ATCC MYA-4609 / CBS 101355 / FGSC A1100 / Af293) (Neosartorya fumigata)	FUNCTION: Responsible for the synthesis of various fatty acid-derived oxylipins. Oxidizes linoleic acid primarily to 10R-hydroperoxy-8,12-octadecadienoic acid (10R-HPODE) and, to a lesser extent, 8R-hydroperoxylinoleic acid (8R-HPODE). Also synthesizes 10-hydroxy-octadeca-8,12-dienoic acid (10-HODE) from linoleic acid and primarily 8R-hydroxy-octadeca-9-monoenoic acid (8-HOME, also known as psiB …	1121
133771	135015	Mb_4556|QLI65830.1	No match	No match	No match	No match	No match
139238	139861	Mb_4556|QLI65721.1	No match	No match	No match	No match	No match
223373	224148	Mb_4556|QLI63689.1	No match	No match	No match	No match	No match
227132	227929	Mb_4556|QLI65128.1	No match	No match	No match	No match	No match
229911	230696	Mb_4556|QLI65448.1	No match	No match	No match	No match	No match
232090	233148	Mb_4556|QLI63904.1	No match	No match	No match	No match	No match
235876	237356	Mb_4556|QLI63793.1	No match	No match	No match	No match	No match
239430	240977	Mb_4556|QLI65650.1	No match	No match	No match	No match	No match
283112	284304	Mb_4556|QLI64771.1	Q9US36	Zinc finger protein klf1 (Krueppel-like zinc finger transcription factor 1)	Schizosaccharomyces pombe (strain 972 / ATCC 24843) (Fission yeast)	FUNCTION: Required for maintaining cell viability in nitrogen-deficient stationary phase (G0) cells. {ECO:0000269|PubMed:17535257}.	781
285427	286155	Mb_4556|QLI64871.1	Q12556	Copper amine oxidase 1 (EC 1.4.3.22)	Aspergillus niger		671
288289	289625	Mb_4556|QLI64570.1	No match	No match	No match	No match	No match
334102	335290	Mb_4556|QLI65191.1	B6F0W8	4,5-DOPA dioxygenase extradiol (MjDOD) (EC 1.13.11.29) (DOPA 4,5-dioxygenase)	Mirabilis jalapa (Garden four-o'clock)	FUNCTION: Opens the cyclic ring of dihydroxy-phenylalanine (DOPA) between carbons 4 and 5, thus producing an unstable seco-DOPA that rearranges nonenzymatically to betalamic acid. Produces mainly (S)-betalamic acid. Required for the coloration of flowers. {ECO:0000269|PubMed:19366710}.	267
337102	337487	Mb_4556|QLI63638.1	No match	No match	No match	No match	No match
410674	411843	Mb_4556|QLI65458.1	No match	No match	No match	No match	No match
413677	414798	Mb_4556|QLI64030.1	No match	No match	No match	No match	No match
425679	429024	Mb_4556|QLI66149.1	No match	No match	No match	No match	No match
431324	431629	Mb_4556|QLI66053.1	No match	No match	No match	No match	No match
434521	435189	Mb_4556|QLI65953.1	No match	No match	No match	No match	No match
442022	442855	Mb_4556|QLI65844.1	O31158	Non-heme chloroperoxidase (EC 1.11.1.-) (Chloride peroxidase) (Chloroperoxidase F) (CPO-F)	Pseudomonas fluorescens		274
446991	447410	Mb_4556|QLI63583.1	No match	No match	No match	No match	No match
447571	448095	Mb_4556|QLI65027.1	No match	No match	No match	No match	No match
524255	525943	Mb_4556|QLI63739.1	W7LC91	Cytochrome P450 monooxygenase FUM15 (EC 1.-.-.-) (Fumonisin biosynthesis cluster protein 15)	Gibberella moniliformis (strain M3125 / FGSC 7600) (Maize ear and stalk rot fungus) (Fusarium verticillioides)	FUNCTION: Cytochrome P450 monooxygenase; part of the gene cluster that mediates the biosynthesis of fumonisins B1 (FB1), B2 (FB2), B3 (FB3), and B4 (FB4), which are carcinogenic mycotoxins (PubMed:12620260). On the basis of the chemical structures of fumonisins and precursor feeding studies, fumonisin biosynthesis is predicted to include at least five groups of biochemical reactions: synthesis of…	596
528435	530408	Mb_4556|QLI64086.1	No match	No match	No match	No match	No match
534401	536986	Mb_4556|QLI63981.1	No match	No match	No match	No match	No match
630761	631006	Mb_4556|QLI64449.1	No match	No match	No match	No match	No match
632778	633005	Mb_4556|QLI65985.1	No match	No match	No match	No match	No match
633805	635545	Mb_4556|QLI64554.1	No match	No match	No match	No match	No match
640153	640991	Mb_4556|QLI64653.1	No match	No match	No match	No match	No match
746404	746697	Mb_4556|QLI64722.1	No match	No match	No match	No match	No match
750001	751359	Mb_4556|QLI65452.1	P38127	Mitochondrial carrier protein RIM2	Saccharomyces cerevisiae (strain ATCC 204508 / S288c) (Baker's yeast)		377
752518	753201	Mb_4556|QLI64186.1	No match	No match	No match	No match	No match
1086278	1087575	Mb_4556|QLI64455.1	No match	No match	No match	No match	No match
1091991	1092785	Mb_4556|QLI66313.1	No match	No match	No match	No match	No match
1110666	1111595	Mb_4556|QLI63742.1	Q8J1X7	Allergen Fus c 3 (allergen Fus c 3)	Fusarium culmorum		450
1111821	1113473	Mb_4556|QLI65295.1	O58308	NAD(P)H coenzyme A polysulfide/persulfide reductase (EC 1.8.1.-) (Coenzyme A disulfide reductase) (CoA-disulfide reductase) (CoADR) (EC 1.8.1.14) (Polysulfide reductase)	Pyrococcus horikoshii (strain ATCC 700860 / DSM 12428 / JCM 9974 / NBRC 100139 / OT-3)	FUNCTION: Catalyzes the NAD(P)H-dependent reduction of polysulfide, CoA-polysulfides, and CoA persulfide, as well as the reduction of a range of other small persulfides, including TNB and glutathione persulfides. The likely in vivo substrates are di-, poly-, and persulfide derivatives of coenzyme A, although polysulfide itself is also efficiently reduced (PubMed:23530771). Shows coenzyme A disulf…	445
1115015	1116235	Mb_4556|QLI65367.1	No match	No match	No match	No match	No match
1715208	1719628	Mb_4556|QLI63701.1	P53048	General alpha-glucoside permease (Maltose permease MAL11) (Maltose transport protein MAL11)	Saccharomyces cerevisiae (strain ATCC 204508 / S288c) (Baker's yeast)	FUNCTION: High-affinity uptake of alpha-glucosides such as maltose, turanose, isomaltose, alpha-methylglucoside, maltotriose, palatinose, trehalose, melezitose and glucose. Acts with the concomitant transport of protons into the cell (symport system). {ECO:0000269|PubMed:10618490, ECO:0000269|PubMed:12210897, ECO:0000269|PubMed:8594329}.	616
1721678	1723723	Mb_4556|QLI64147.1	E8MGH8	Non-reducing end beta-L-arabinofuranosidase (EC 3.2.1.185) (Beta-L-arabinofuranosidase) (Beta-AFase)	Bifidobacterium longum subsp. longum (strain ATCC 15707 / DSM 20219 / JCM 1217 / NCTC 11818 / E194b)	FUNCTION: Beta-L-arabinofuranosidase that removes the beta-L-arabinofuranose residue from the non-reducing end of various substrates, including beta-L-arabinofuranosyl-hydroxyproline (Ara-Hyp), Ara-beta-1,2-Ara-beta-Hyp (Ara(2)-Hyp), Ara-beta-1,2-Ara-beta-1,2-Ara-beta-Hyp (Ara(3)-Hyp), and beta-L-arabinofuranosyl-(1->2)-1-O-methyl-beta-L-arabinofuranose. In the presence of 1-alkanols, shows trans…	658
1745792	1746147	Mb_4556|QLI65791.1	No match	No match	No match	No match	No match
1748772	1750223	Mb_4556|QLI64577.1	No match	No match	No match	No match	No match
1861964	1864145	Mb_4556|QLI64779.1	No match	No match	No match	No match	No match
1868045	1868674	Mb_4556|QLI66066.1	Q566R0	Acyl-coenzyme A thioesterase THEM4 (Acyl-CoA thioesterase THEM4) (EC 3.1.2.2) (Thioesterase superfamily member 4)	Rattus norvegicus (Rat)	FUNCTION: Has acyl-CoA thioesterase activity towards medium and long-chain (C14 to C18) fatty acyl-CoA substrates, and probably plays a role in mitochondrial fatty acid metabolism (By similarity). Plays a role in the apoptotic process, possibly via its regulation of AKT1 activity (By similarity). {ECO:0000250|UniProtKB:Q5T1C6}.	230
1870373	1871017	Mb_4556|QLI64622.1	No match	No match	No match	No match	No match
1873475	1874557	Mb_4556|QLI65963.1	No match	No match	No match	No match	No match
2068509	2069105	Mb_4556|QLI64014.1	No match	No match	No match	No match	No match
2073097	2074613	Mb_4556|QLI64114.1	No match	No match	No match	No match	No match
2077481	2079691	Mb_4556|QLI63790.1	I1RF57	Aurofusarin cluster transcription factor aurR2 (Aurofusarin biosynthesis cluster protein R2) (Gibberella pigment protein 5)	Gibberella zeae (strain ATCC MYA-4620 / CBS 123657 / FGSC 9075 / NRRL 31084 / PH-1) (Wheat head blight fungus) (Fusarium graminearum)	FUNCTION: Transcription factor that may participate in the regulation of the expression of the gene cluster that mediates the biosynthesis of aurofusarin, a red mycelium pigment which is acting as a mycotoxin (PubMed:15809006, PubMed:16879655, PubMed:16461721). {ECO:0000269|PubMed:15809006, ECO:0000269|PubMed:16461721, ECO:0000269|PubMed:16879655}.	670
2082273	2082872	Mb_4556|QLI64183.1	No match	No match	No match	No match	No match
2698267	2700293	Mb_4556|QLI64170.1	No match	No match	No match	No match	No match
2700324	2700908	Mb_4556|QLI65710.1	No match	No match	No match	No match	No match
2999950	3000532	Mb_4556|QLI66366.1	No match	No match	No match	No match	No match
3005415	3007275	Mb_4556|QLI63595.1	No match	No match	No match	No match	No match
3135206	3136277	Mb_4556|QLI64681.1	Q9UKM7	Endoplasmic reticulum mannosyl-oligosaccharide 1,2-alpha-mannosidase (EC 3.2.1.113) (ER alpha-1,2-mannosidase) (ER mannosidase 1) (ERMan1) (Man9GlcNAc2-specific-processing alpha-mannosidase) (Mannosidase alpha class 1B member 1)	Homo sapiens (Human)	FUNCTION: Involved in glycoprotein quality control targeting of misfolded glycoproteins for degradation. It primarily trims a single alpha-1,2-linked mannose residue from Man(9)GlcNAc(2) to produce Man(8)GlcNAc(2), but at high enzyme concentrations, as found in the ER quality control compartment (ERQC), it further trims the carbohydrates to Man(5-6)GlcNAc(2). {ECO:0000269|PubMed:12090241, ECO:000…	699
3137789	3138451	Mb_4556|QLI66116.1	No match	No match	No match	No match	No match
3233366	3234333	Mb_4556|QLI63819.1	No match	No match	No match	No match	No match
3236499	3238165	Mb_4556|QLI65363.1	No match	No match	No match	No match	No match
3763017	3764777	Mb_4556|QLI63766.1	O64745	Berberine bridge enzyme-like 16 (AtBBE-like 16) (EC 1.1.1.-)	Arabidopsis thaliana (Mouse-ear cress)		540
3768543	3770082	Mb_4556|QLI65403.1	Q5IZM4	Sterol 14alpha-demethylase (EC 1.14.15.36) (CYPLI) (Cytochrome P450 51) (Cytochrome P450-14DM) (Cytochrome P450-LIA1) (Sterol 14-alpha demethylase)	Mycolicibacterium vanbaalenii (strain DSM 7251 / JCM 13017 / BCRC 16820 / KCTC 9966 / NRRL B-24157 / PYR-1) (Mycobacterium vanbaalenii)	FUNCTION: Sterol 14alpha-demethylase whose physiological substrate is not known. Accepts electrons from the iron-sulfur ferredoxin Fdx encoded by an adjacent gene. In vitro, catalyzes C14-demethylation of lanosterol, 24,25-dihydrolanosterol and obtusifoliol, to produce the 8,14-dienes stereoselectively. {ECO:0000250|UniProtKB:P9WPP9}.	452
3771593	3772672	Mb_4556|QLI66402.1	E9KMQ2	Non-reducing polyketide synthase PKS16 (NR-PKS PKS16) (EC 2.3.1.-) (Grayanic acid biosynthesis cluster PKS)	Cladonia grayi (Gray's cup lichen)	FUNCTION: Non-reducing polyketide synthase; part of the gene cluster that mediates the biosynthesis of orcinol depsidone grayanic acid (GRA), the only major secondary metabolite known in C.grayi (PubMed:21289108). The first step consists in the ring and depside synthesis by PKS16 leading to 4-O-demethylsphaerophorin, involving different orcinol-like rings, one with acetyl CoA and the other with o…	2089
3776979	3778758	Mb_4556|QLI65537.1	Q9C447	FAD-dependent monooxygenase paxM (EC 1.-.-.-) (Paxilline synthesis protein M)	Penicillium paxilli	FUNCTION: FAD-dependent monooxygenase; part of the gene cluster that mediates the biosynthesis of paxilline, a mycotoxin that acts as an inhibitor of mammalian maxi-K channels (PubMed:11169115, PubMed:23949005, PubMed:16494875). PaxG, the geranylgeranyl diphosphate (GGPP) synthase is proposed to catalyze the first step in paxilline biosynthesis (PubMed:23949005, PubMed:16494875). Condensation of …	477
3780699	3783302	Mb_4556|QLI66234.1	No match	No match	No match	No match	No match
4256045	4257343	Mb_4556|QLI65217.1	B5BLW5	Arylesterase (A-esterase) (EC 3.1.1.2) (Paraoxonase) (EC 3.1.8.1)	Saccharolobus solfataricus (Sulfolobus solfataricus)	FUNCTION: Has a broad substrate specificity. Hydrolyzes various p-nitrophenyl phosphates, aromatic esters and p-nitrophenyl fatty acids in vitro. Most active against paraoxon, phenyl acetate and p-nitrophenyl caproate (C6), respectively. Has also tributyrinase activity, but shows no hydrolytic activity toward other triacylglycerols including tricaprylin, trimyristin, tripalmitin or triolein in vi…	306
4257823	4259833	Mb_4556|QLI63671.1	Q92253	Probable glucose transporter rco-3	Neurospora crassa (strain ATCC 24698 / 74-OR23-1A / CBS 708.71 / DSM 1257 / FGSC 987)	FUNCTION: Probable glucose transporter. Involved in sugar transport, carbon catabolite repression, and initiation of conidiophore development.	594
5043905	5044969	Mb_4556|QLI65573.1	B3QPI5	S-adenosylmethionine:tRNA ribosyltransferase-isomerase (EC 2.4.99.17) (Queuosine biosynthesis protein QueA)	Chlorobaculum parvum (strain DSM 263 / NCIMB 8327) (Chlorobium vibrioforme subsp. thiosulfatophilum)	FUNCTION: Transfers and isomerizes the ribose moiety from AdoMet to the 7-aminomethyl group of 7-deazaguanine (preQ1-tRNA) to give epoxyqueuosine (oQ-tRNA). {ECO:0000255|HAMAP-Rule:MF_00113}.	340
5046743	5047878	Mb_4556|QLI63733.1	Q8GWL1	Protein HEAT-STRESS-ASSOCIATED 32 (Heat-stress-associated 32-kDa protein)	Arabidopsis thaliana (Mouse-ear cress)	FUNCTION: Transactivator required, together with HSP101, for long-term acquired thermotolerance (LAT) maintenance, probably by regulating heat-inducible genes expression, thus being a cellular component of thermomemory. {ECO:0000269|PubMed:16500991, ECO:0000269|PubMed:17085506}.	286
5511381	5512038	Mb_4556|QLI63616.1	No match	No match	No match	No match	No match
5512975	5513541	Mb_4556|QLI65172.1	No match	No match	No match	No match	No match
5518316	5519385	Mb_4556|QLI64856.1	No match	No match	No match	No match	No match
5661084	5662903	Mb_4556|QLI65590.1	No match	No match	No match	No match	No match
5663994	5664793	Mb_4556|QLI64150.1	No match	No match	No match	No match	No match
5904047	5905252	Mb_4556|QLI66178.1	No match	No match	No match	No match	No match
5909494	5910447	Mb_4556|QLI64938.1	No match	No match	No match	No match	No match
5924973	5925964	Mb_4556|QLI65230.1	Q2UPC1	MFS efflux transporter aclA (Aspirochlorine biosynthesis protein A)	Aspergillus oryzae (strain ATCC 42149 / RIB 40) (Yellow koji mold)	FUNCTION: MFS efflux transporter; part of the gene cluster that mediates the biosynthesis of aspirochlorine (or antibiotic A30641), an unusual halogenated spiro compound with distinctive antifungal properties due to selective inhibition of protein biosynthesis, and which is also active against bacteria, viruses, and murine tumor cells (PubMed:25302411). {ECO:0000305|PubMed:25302411}.	551
5930021	5931174	Mb_4556|QLI63897.1	No match	No match	No match	No match	No match
6320517	6322774	Mb_4556|QLI65162.1	P25375	Saccharolysin (EC 3.4.24.37) (Oligopeptidase YSCD) (Protease D) (Proteinase yscD)	Saccharomyces cerevisiae (strain ATCC 204508 / S288c) (Baker's yeast)	FUNCTION: Could be involved in late stage of protein degradation.	712
6325829	6326713	Mb_4556|QLI64692.1	No match	No match	No match	No match	No match
6407163	6409050	Mb_4556|QLI64015.1	S0EEY7	Efflux pump FUS6 (Fusarin biosynthesis protein 6)	Gibberella fujikuroi (strain CBS 195.34 / IMI 58289 / NRRL A-6831) (Bakanae and foot rot disease fungus) (Fusarium fujikuroi)	FUNCTION: Efflux pump; part of the gene cluster that mediates the biosynthesis of the mycotoxin fusarin C (PubMed:23932525). Within the cluster, FUS1, FUS2, FUS8 and FUS9 are sufficient for fusarin production (PubMed:23932525). The other FUS cluster members are not essential for fusarin C biosynthesis (PubMed:23932525). {ECO:0000269|PubMed:23932525}.	555
6412798	6414261	Mb_4556|QLI65556.1	No match	No match	No match	No match	No match
6419167	6421380	Mb_4556|QLI64390.1	No match	No match	No match	No match	No match
6523630	6524532	Mb_4556|QLI65323.1	B9KYW4	Endonuclease MutS2 (EC 3.1.-.-)	Thermomicrobium roseum (strain ATCC 27502 / DSM 5159 / P-2)	FUNCTION: Endonuclease that is involved in the suppression of homologous recombination and may therefore have a key role in the control of bacterial genetic diversity. {ECO:0000255|HAMAP-Rule:MF_00092}.	792
6525479	6526804	Mb_4556|QLI63782.1	No match	No match	No match	No match	No match
6735930	6736463	Mb_4556|QLI63705.1	No match	No match	No match	No match	No match
6737071	6738144	Mb_4556|QLI65261.1	O06012	Uncharacterized zinc-type alcohol dehydrogenase-like protein AdhB (EC 1.-.-.-)	Bacillus subtilis (strain 168)		378
6743048	6743680	Mb_4556|QLI63928.1	No match	No match	No match	No match	No match
6743885	6745223	Mb_4556|QLI65469.1	O82056	Probable cinnamyl alcohol dehydrogenase (CAD) (EC 1.1.1.195)	Saccharum officinarum (Sugarcane)	FUNCTION: Involved in lignin biosynthesis. Catalyzes the final step specific for the production of lignin monomers. Catalyzes the NADPH-dependent reduction of coniferaldehyde, 5-hydroxyconiferaldehyde, sinapaldehyde, 4-coumaraldehyde and caffeyl aldehyde to their respective alcohols. {ECO:0000250|UniProtKB:O49482}.	365
6749167	6750463	Mb_4556|QLI64312.1	No match	No match	No match	No match	No match
6751404	6752117	Mb_4556|QLI65742.1	No match	No match	No match	No match	No match
6752810	6754118	Mb_4556|QLI64201.1	Q6HMS9	Trans-3-hydroxy-L-proline dehydratase (T3LHyp dehydratase) (t3HypD) (EC 4.2.1.77) (Trans-L-3-hydroxyproline dehydratase)	Bacillus thuringiensis subsp. konkukian (strain 97-27)	FUNCTION: Catalyzes the dehydration of trans-3-hydroxy-L-proline (t3LHyp) to Delta(1)-pyrroline-2-carboxylate (Pyr2C). Is likely involved in a degradation pathway that converts t3LHyp to L-proline. Can also catalyze the epimerization of trans-4-hydroxy-L-proline (t4LHyp) to cis-4-hydroxy-D-proline (c4DHyp) in vitro. Displays no proline racemase activity. {ECO:0000269|PubMed:24980702, ECO:0000305|…	334
6757430	6757987	Mb_4556|QLI65639.1	No match	No match	No match	No match	No match
6842851	6845027	Mb_4556|QLI65632.1	Q4WT65	ABC multidrug transporter B	Aspergillus fumigatus (strain ATCC MYA-4609 / CBS 101355 / FGSC A1100 / Af293) (Neosartorya fumigata)	FUNCTION: Pleiotropic ABC efflux transporter that may be involved in A.fumigatus adaptation to azoles such as vorizonazole. {ECO:0000305|PubMed:16622700}.	1458
6847770	6848371	Mb_4556|QLI65297.1	No match	No match	No match	No match	No match
6866522	6868093	Mb_4556|QLI64671.1	O34703	Uncharacterized ATPase YjoB (EC 3.-.-.-)	Bacillus subtilis (strain 168)	FUNCTION: Shows ATPase activity. {ECO:0000269|PubMed:14757246}.	423
6870231	6870797	Mb_4556|QLI66100.1	No match	No match	No match	No match	No match
6893247	6893825	Mb_4556|QLI65077.1	No match	No match	No match	No match	No match
6898514	6899408	Mb_4556|QLI66351.1	No match	No match	No match	No match	No match
7214823	7216873	Mb_4556|QLI65279.1	No match	No match	No match	No match	No match
7216967	7217688	Mb_4556|QLI63843.1	Q2UB88	3-hydroxyanthranilate 3,4-dioxygenase 2 (EC 1.13.11.6) (3-hydroxyanthranilate oxygenase 2) (3-HAO-2) (3-hydroxyanthranilic acid dioxygenase 2) (HAD-2) (Biosynthesis of nicotinic acid protein 1-2)	Aspergillus oryzae (strain ATCC 42149 / RIB 40) (Yellow koji mold)	FUNCTION: Catalyzes the oxidative ring opening of 3-hydroxyanthranilate to 2-amino-3-carboxymuconate semialdehyde, which spontaneously cyclizes to quinolinate. {ECO:0000255|HAMAP-Rule:MF_03019}.	179
7218037	7219368	Mb_4556|QLI65176.1	Q54LN9	2-amino-3-carboxymuconate-6-semialdehyde decarboxylase (EC 4.1.1.45) (Picolinate carboxylase)	Dictyostelium discoideum (Social amoeba)	FUNCTION: Converts alpha-amino-beta-carboxymuconate-epsilon-semialdehyde (ACMS) to alpha-aminomuconate semialdehyde (AMS). {ECO:0000250}.	359
7219666	7221322	Mb_4556|QLI63727.1	Q0P5F9	2-aminomuconic semialdehyde dehydrogenase (EC 1.2.1.32) (Aldehyde dehydrogenase family 8 member A1)	Bos taurus (Bovine)	FUNCTION: Catalyzes the NAD-dependent oxidation of 2-aminomuconic semialdehyde of the kynurenine metabolic pathway in L-tryptophan degradation. {ECO:0000250|UniProtKB:Q9H2A2}.	487
8385832	8386373	Mb_4556|QLI64117.1	No match	No match	No match	No match	No match
8387832	8388821	Mb_4556|QLI65653.1	No match	No match	No match	No match	No match
8621059	8621519	Mb_4556|QLI65868.1	A6NFH5	Fatty acid-binding protein 12	Homo sapiens (Human)	FUNCTION: May play a role in lipid transport. {ECO:0000250}.	140
8622265	8623956	Mb_4556|QLI64332.1	P33287	Pyruvate decarboxylase (EC 4.1.1.1) (8-10 nm cytoplasmic filament-associated protein) (P59NC)	Neurospora crassa (strain ATCC 24698 / 74-OR23-1A / CBS 708.71 / DSM 1257 / FGSC 987)		570
8681920	8682456	Mb_4556|QLI66339.1	No match	No match	No match	No match	No match
8683334	8684194	Mb_4556|QLI64800.1	No match	No match	No match	No match	No match
8687699	8688764	Mb_4556|QLI64895.1	No match	No match	No match	No match	No match
8746443	8747358	Mb_4556|QLI64991.1	No match	No match	No match	No match	No match
8748985	8750858	Mb_4556|QLI66040.1	A0A075TXZ3	Carboxylesterase patB (EC 3.1.1.1) (Patulin biosynthesis cluster protein B)	Penicillium expansum (Blue mold rot fungus)	FUNCTION: Carboxylesterase; part of the gene cluster that mediates the biosynthesis of patulin, an acetate-derived tetraketide mycotoxin produced by several fungal species that shows antimicrobial properties against several bacteria (PubMed:30100914, PubMed:25625822, PubMed:30680886). The function of patB in patulin synthesis has still to be characterized (PubMed:30680886). The pathway begins wit…	561
8752164	8753059	Mb_4556|QLI64503.1	P76049	Uncharacterized protein YcjY	Escherichia coli (strain K12)		306
8895924	8897753	Mb_4556|QLI63759.1	No match	No match	No match	No match	No match
8899217	8899473	Mb_4556|QLI65306.1	No match	No match	No match	No match	No match
8900276	8901097	Mb_4556|QLI63657.1	No match	No match	No match	No match	No match
8940342	8942647	Mb_4556|QLI65629.1	S0E028	Bikaverin cluster transcription factor bik5 (Bikaverin biosynthesis protein 5)	Gibberella fujikuroi (strain CBS 195.34 / IMI 58289 / NRRL A-6831) (Bakanae and foot rot disease fungus) (Fusarium fujikuroi)	FUNCTION: Transcription factor that regulates the expression of the gene cluster that mediates the biosynthesis of bikaverin, a red pigment also considered as a mycotoxin (PubMed:19400779). {ECO:0000269|PubMed:19400779}.	743
8943287	8944258	Mb_4556|QLI64091.1	P56095	AP-1-like transcription factor YAP1	Kluyveromyces lactis (strain ATCC 8585 / CBS 2359 / DSM 70799 / NBRC 1267 / NRRL Y-1140 / WM37) (Yeast) (Candida sphaerica)	FUNCTION: Transcription activator involved in oxidative stress response and cadmium resistance (PubMed:9439570). Regulates the transcription of genes encoding antioxidant enzymes and components of the cellular thiol-reducing pathways. Activity of the transcription factor is controlled through oxidation of specific cysteine residues resulting in the alteration of its subcellular location. Activati…	583
8971916	8972725	Mb_4556|QLI63694.1	No match	No match	No match	No match	No match
8974144	8975501	Mb_4556|QLI65243.1	No match	No match	No match	No match	No match
8985038	8985856	Mb_4556|QLI65032.1	No match	No match	No match	No match	No match
8989331	8990052	Mb_4556|QLI64728.1	No match	No match	No match	No match	No match
8992189	8994282	Mb_4556|QLI63992.1	No match	No match	No match	No match	No match
8998910	9000578	Mb_4556|QLI65633.1	No match	No match	No match	No match	No match
8998910	9000578	Mb_4556|QLI74768.1	No match	No match	No match	No match	No match
9002834	9003466	Mb_4556|QLI64094.1	No match	No match	No match	No match	No match
9016874	9017905	Mb_4556|QLI64419.1	No match	No match	No match	No match	No match
9016874	9017905	Mb_4556|QLI74366.1	No match	No match	No match	No match	No match
9023848	9024438	Mb_4556|QLI66367.1	No match	No match	No match	No match	No match
9023848	9024438	Mb_4556|QLI74803.1	No match	No match	No match	No match	No match
9023848	9029516	Mb_4556|QLI66367.1	No match	No match	No match	No match	No match
9023848	9029516	Mb_4556|QLI74803.1	No match	No match	No match	No match	No match
9025530	9026146	Mb_4556|QLI64733.1	No match	No match	No match	No match	No match
9025530	9026146	Mb_4556|QLI64926.1	No match	No match	No match	No match	No match
9027519	9028124	Mb_4556|QLI65037.1	No match	No match	No match	No match	No match
9027519	9028124	Mb_4556|QLI65248.1	No match	No match	No match	No match	No match
9028878	9029516	Mb_4556|QLI63590.1	No match	No match	No match	No match	No match
9030607	9031223	Mb_4556|QLI64733.1	No match	No match	No match	No match	No match
9030607	9031223	Mb_4556|QLI64926.1	No match	No match	No match	No match	No match
9032596	9033201	Mb_4556|QLI65037.1	No match	No match	No match	No match	No match
9032596	9033201	Mb_4556|QLI65248.1	No match	No match	No match	No match	No match
9034812	9037169	Mb_4556|QLI63826.1	No match	No match	No match	No match	No match
9037453	9038412	Mb_4556|QLI63927.1	No match	No match	No match	No match	No match
9039471	9040118	Mb_4556|QLI65349.1	No match	No match	No match	No match	No match
9157780	9158238	Mb_4556|QLI64753.1	No match	No match	No match	No match	No match
9162391	9164378	Mb_4556|QLI65518.1	No match	No match	No match	No match	No match
9244370	9244739	Mb_4556|QLI65783.1	No match	No match	No match	No match	No match
9245600	9245944	Mb_4556|QLI65672.1	No match	No match	No match	No match	No match
9290362	9291271	Mb_4556|QLI64461.1	No match	No match	No match	No match	No match
9292992	9293875	Mb_4556|QLI66319.1	No match	No match	No match	No match	No match
9297405	9298550	Mb_4556|QLI64879.1	No match	No match	No match	No match	No match
9311683	9312509	Mb_4556|QLI64778.1	No match	No match	No match	No match	No match
9316022	9317908	Mb_4556|QLI64477.1	No match	No match	No match	No match	No match
9318609	9321857	Mb_4556|QLI64041.1	No match	No match	No match	No match	No match
9323545	9323811	Mb_4556|QLI65470.1	No match	No match	No match	No match	No match
9339381	9340463	Mb_4556|QLI65155.1	No match	No match	No match	No match	No match
9341664	9342589	Mb_4556|QLI63603.1	No match	No match	No match	No match	No match
9385222	9385551	Mb_4556|QLI66069.1	No match	No match	No match	No match	No match
9388146	9388457	Mb_4556|QLI65431.1	No match	No match	No match	No match	No match
9398904	9400140	Mb_4556|QLI64026.1	No match	No match	No match	No match	No match
9400593	9401488	Mb_4556|QLI65447.1	No match	No match	No match	No match	No match
9405566	9406231	Mb_4556|QLI64912.1	No match	No match	No match	No match	No match
9435757	9436936	Mb_4556|QLI64297.1	No match	No match	No match	No match	No match
9437933	9439585	Mb_4556|QLI65839.1	Q9P6J0	Uncharacterized transporter C1683.12	Schizosaccharomyces pombe (strain 972 / ATCC 24843) (Fission yeast)		482
9444174	9444498	Mb_4556|QLI64894.1	No match	No match	No match	No match	No match
9448526	9449670	Mb_4556|QLI65241.1	No match	No match	No match	No match	No match
9452061	9452930	Mb_4556|QLI65347.1	No match	No match	No match	No match	No match
Chromosome_CP058938.1
6594	9817	Mb_4556|QLI74312.1	S0DTP6	Non-reducing polyketide synthase fsr1 (EC 2.3.1.-) (Fusarubin biosynthesis cluster protein 1) (Pigmentless perithecia protein 1) (Polyketide synthase 3)	Gibberella fujikuroi (strain CBS 195.34 / IMI 58289 / NRRL A-6831) (Bakanae and foot rot disease fungus) (Fusarium fujikuroi)	FUNCTION: Non-reducing polyketide synthase; part of the gene cluster that mediates the biosynthesis of fusarubins, highly pigmented naphthoquinones responsible for the coloration of the fruiting bodies (PubMed:22492438, PubMed:23825955). The non-reducing polyketide synthase FSR1 is responsible for the condensation of seven acetyl-CoA units to yield a haptaketide (PubMed:22492438). After rings A a…	2286
9899	14022	Mb_4556|QLI74744.1	S0DTP6	Non-reducing polyketide synthase fsr1 (EC 2.3.1.-) (Fusarubin biosynthesis cluster protein 1) (Pigmentless perithecia protein 1) (Polyketide synthase 3)	Gibberella fujikuroi (strain CBS 195.34 / IMI 58289 / NRRL A-6831) (Bakanae and foot rot disease fungus) (Fusarium fujikuroi)	FUNCTION: Non-reducing polyketide synthase; part of the gene cluster that mediates the biosynthesis of fusarubins, highly pigmented naphthoquinones responsible for the coloration of the fruiting bodies (PubMed:22492438, PubMed:23825955). The non-reducing polyketide synthase FSR1 is responsible for the condensation of seven acetyl-CoA units to yield a haptaketide (PubMed:22492438). After rings A a…	2286
92564	93114	Mb_4556|QLI74290.1	No match	No match	No match	No match	No match
94505	95680	Mb_4556|QLI74553.1	B8N106	Alkaline protease 1 (ALP) (EC 3.4.21.63) (Aspergillopeptidase B) (Aspergillus proteinase B) (Elastase) (Elastinolytic serine proteinase) (Oryzin) (allergen Asp fl 1)	Aspergillus flavus (strain ATCC 200026 / FGSC A1120 / IAM 13836 / NRRL 3357 / JCM 12722 / SRRC 167)	FUNCTION: Secreted alkaline protease that allows assimilation of proteinaceous substrates. {ECO:0000250}.	403
124137	124427	Mb_4556|QLI74097.1	No match	No match	No match	No match	No match
126007	127195	Mb_4556|QLI74671.1	No match	No match	No match	No match	No match
136526	137800	Mb_4556|QLI74787.1	Q12109	Tryptophan--tRNA ligase, cytoplasmic (EC 6.1.1.2) (Tryptophanyl-tRNA synthetase) (TrpRS)	Saccharomyces cerevisiae (strain ATCC 204508 / S288c) (Baker's yeast)		432
142191	144046	Mb_4556|QLI74763.1	Q4WED9	Isocyanide synthase xanB (ICS xanB) (EC 1.-.-.-) (Xanthocillin biosynthesis cluster protein B)	Aspergillus fumigatus (strain ATCC MYA-4609 / CBS 101355 / FGSC A1100 / Af293) (Neosartorya fumigata)	FUNCTION: Isocyanide synthase; part of the gene cluster that mediates the biosynthesis of the isocyanide xanthocillin and its derivatives (PubMed:29844112). The first step of the pathway consists in the conversion of tyrosine into a vinyl-isonitrile intermediate by the isocyanide synthase xanB (PubMed:29844112). Subsequent oxidative dimerization of this intermediate to form xanthocillin may invol…	761
186365	187525	Mb_4556|QLI74068.1	C5A4R8	Asparagine--tRNA ligase (EC 6.1.1.22) (Asparaginyl-tRNA synthetase) (AsnRS)	Thermococcus gammatolerans (strain DSM 15229 / JCM 11827 / EJ3)		430
190310	192550	Mb_4556|QLI74724.1	Q99S97	Multidrug efflux pump SdrM	Staphylococcus aureus (strain N315)	FUNCTION: Energy-dependent drug efflux pump that increases resistance to antimicrobial agents such as norfloxacin, acriflavine and ethidium bromide. {ECO:0000269|PubMed:16508166}.	447
192708	194547	Mb_4556|QLI74634.1	P50287	Isoaspartyl peptidase/L-asparaginase 1 (EC 3.4.19.5) (L-asparagine amidohydrolase 1) [Cleaved into: Isoaspartyl peptidase/L-asparaginase 1 subunit alpha; Isoaspartyl peptidase/L-asparaginase 1 subunit beta]	Arabidopsis thaliana (Mouse-ear cress)	FUNCTION: Acts in asparagine catabolism but also in the final steps of protein and degradation via hydrolysis of a range of isoaspartyl dipeptides. The affinity for Asn and at least 4 isoaspartyl dipeptides (L-beta-Asp-Ala, L-beta-Asp-Gly, L-beta-Asp-Leu, L-beta-Asp-Phe) is quite low, KM being greater than 4.0 mM. The enzyme is inactive on alpha-aspartyl dipeptides. {ECO:0000269|PubMed:11988085}.	315
264754	265691	Mb_4556|QLI74720.1	No match	No match	No match	No match	No match
267657	268019	Mb_4556|QLI74345.1	No match	No match	No match	No match	No match
269427	270428	Mb_4556|QLI74745.1	No match	No match	No match	No match	No match
271264	272778	Mb_4556|QLI74136.1	No match	No match	No match	No match	No match
273218	273736	Mb_4556|QLI74541.1	No match	No match	No match	No match	No match
330711	332045	Mb_4556|QLI74277.1	No match	No match	No match	No match	No match
333087	333458	Mb_4556|QLI74675.1	No match	No match	No match	No match	No match
395235	398526	Mb_4556|QLI74386.1	No match	No match	No match	No match	No match
401708	402742	Mb_4556|QLI74728.1	No match	No match	No match	No match	No match
408525	410213	Mb_4556|QLI74329.1	E9KMQ4	Grayanic acid biosynthesis cluster O-methyltransferase (EC 2.1.1.-)	Cladonia grayi (Gray's cup lichen)	FUNCTION: Non-reducing polyketide synthase; part of the gene cluster that mediates the biosynthesis of orcinol depsidone grayanic acid (GRA), the only major secondary metabolite known in C.grayi (PubMed:21289108). The first step consists in the ring and depside synthesis by PKS16 leading to 4-O-demethylsphaerophorin, involving different orcinol-like rings, one with acetyl CoA and the other with o…	450
411306	414101	Mb_4556|QLI74667.1	A7XRY0	Didemethylasterriquinone D synthetase tdiA (EC 2.3.1.-) (Nonribosomal peptide synthase tdiA) (Terrequinone biosynthesis protein A)	Emericella nidulans (strain FGSC A4 / ATCC 38163 / CBS 112.46 / NRRL 194 / M139) (Aspergillus nidulans)	FUNCTION: Didemethylasterriquinone D synthetase; part of the gene cluster that mediates the biosynthesis of terrequinone A, an antitumor agent (PubMed:17704773, PubMed:16426969, PubMed:17291795, PubMed:22083274). The first step in the biosynthetic pathway for terrequinone A is formation of indole pyruvic acid (IPA) from L-tryptophan by the aminotransferase tdiD (PubMed:17704773). The nonribosomal…	970
415080	415451	Mb_4556|QLI74237.1	No match	No match	No match	No match	No match
436856	438223	Mb_4556|QLI74425.1	No match	No match	No match	No match	No match
439328	441049	Mb_4556|QLI74511.1	No match	No match	No match	No match	No match
441146	441538	Mb_4556|QLI74481.1	No match	No match	No match	No match	No match
534864	535373	Mb_4556|QLI74212.1	No match	No match	No match	No match	No match
537579	538151	Mb_4556|QLI74607.1	No match	No match	No match	No match	No match
548296	549242	Mb_4556|QLI74820.1	Q01663	AP-1-like transcription factor (Caffeine resistance protein 3)	Schizosaccharomyces pombe (strain 972 / ATCC 24843) (Fission yeast)	FUNCTION: Transcription activator involved in multidrug resistance, oxidative stress response, and redox homeostasis. Regulates the transcription of genes encoding antioxidant enzymes like catalase ctt1 and components of the cellular thiol-reducing pathways, including the thioredoxin system (trx2, trr1), ABC transporters involved in multidrug resistance like bfr1/hba2 and pmd1 as well as the gene…	552
553596	554502	Mb_4556|QLI74088.1	No match	No match	No match	No match	No match
555593	556186	Mb_4556|QLI74515.1	Q59RQ0	ATP-dependent DNA helicase PIF1 (EC 3.6.4.12) (DNA repair and recombination helicase PIF1)	Candida albicans (strain SC5314 / ATCC MYA-2876) (Yeast)	FUNCTION: DNA-dependent ATPase and 5'-3' DNA helicase required for the maintenance of both mitochondrial and nuclear genome stability. Efficiently unwinds G-quadruplex (G4) DNA structures and forked RNA-DNA hybrids. Resolves G4 structures, preventing replication pausing and double-strand breaks (DSBs) at G4 motifs. Involved in the maintenance of telomeric DNA. Inhibits telomere elongation, de nov…	906
708030	709029	Mb_4556|QLI74278.1	P47173	Uncharacterized protein YJR142W	Saccharomyces cerevisiae (strain ATCC 204508 / S288c) (Baker's yeast)		342
712134	714006	Mb_4556|QLI74746.1	Q9US44	Uncharacterized transporter C1002.16c	Schizosaccharomyces pombe (strain 972 / ATCC 24843) (Fission yeast)		499
714632	716117	Mb_4556|QLI74315.1	O94343	Uncharacterized MFS-type transporter C1271.10c	Schizosaccharomyces pombe (strain 972 / ATCC 24843) (Fission yeast)		581
856651	858542	Mb_4556|QLI74633.1	Q4WGE2	Siderochrome iron transporter 2	Aspergillus fumigatus (strain ATCC MYA-4609 / CBS 101355 / FGSC A1100 / Af293) (Neosartorya fumigata)	FUNCTION: Major facilitator transporter involved in ferrichrome (FC) uptake (PubMed:26929401). {ECO:0000269|PubMed:26929401}.	607
860298	861479	Mb_4556|QLI74260.1	No match	No match	No match	No match	No match
863866	864435	Mb_4556|QLI74697.1	No match	No match	No match	No match	No match
917627	918646	Mb_4556|QLI74641.1	No match	No match	No match	No match	No match
922897	923488	Mb_4556|QLI74608.1	No match	No match	No match	No match	No match
923744	924569	Mb_4556|QLI74072.1	No match	No match	No match	No match	No match
930775	931581	Mb_4556|QLI74439.1	No match	No match	No match	No match	No match
934281	939058	Mb_4556|QLI74006.1	Q00808	Vegetative incompatibility protein HET-E-1	Podospora anserina (Pleurage anserina)	FUNCTION: Responsible for vegetative incompatibility through specific interactions with different alleles of the unlinked gene, het-c.	1356
1014420	1017047	Mb_4556|QLI74244.1	No match	No match	No match	No match	No match
1019542	1021629	Mb_4556|QLI74060.1	No match	No match	No match	No match	No match
1127207	1127516	Mb_4556|QLI74640.1	No match	No match	No match	No match	No match
1128899	1132066	Mb_4556|QLI74238.1	No match	No match	No match	No match	No match
1852391	1853344	Mb_4556|QLI74025.1	No match	No match	No match	No match	No match
1855633	1856043	Mb_4556|QLI74818.1	No match	No match	No match	No match	No match
1873835	1875113	Mb_4556|QLI74776.1	No match	No match	No match	No match	No match
1877836	1878327	Mb_4556|QLI74350.1	No match	No match	No match	No match	No match
1879346	1880547	Mb_4556|QLI74749.1	No match	No match	No match	No match	No match
1916218	1918272	Mb_4556|QLI74106.1	No match	No match	No match	No match	No match
1921096	1921896	Mb_4556|QLI74281.1	No match	No match	No match	No match	No match
1942728	1943474	Mb_4556|QLI74709.1	Q9UUG8	Transcriptional repressor tup12	Schizosaccharomyces pombe (strain 972 / ATCC 24843) (Fission yeast)	FUNCTION: Transcriptional repressor.	598
1947344	1949092	Mb_4556|QLI74530.1	Q68FU4	Succinate--hydroxymethylglutarate CoA-transferase (EC 2.8.3.13) (SuccinylCoA:glutarate-CoA transferase)	Rattus norvegicus (Rat)	FUNCTION: Catalyzes the succinyl-CoA-dependent conversion of glutarate to glutaryl-CoA. Can use different dicarboxylic acids as CoA acceptors, the preferred ones are glutarate, succinate, adipate, and 3-hydroxymethylglutarate (By similarity). {ECO:0000250}.	436
1950303	1952217	Mb_4556|QLI74135.1	Q5SBL4	Fusaridione A cluster transcription factor fsdR (Fusaridione A biosynthesis protein R)	Fusarium heterosporum	FUNCTION: Transcription factor that regulates the expression of the gene cluster that mediates the biosynthesis of fusaridione A (PubMed:23614392). {ECO:0000305|PubMed:23614392}.	520
1952869	1954232	Mb_4556|QLI74222.1	Q5BD77	Probable 4-hydroxy-2-oxoglutarate aldolase, mitochondrial (EC 4.1.3.16) (Dihydrodipicolinate synthase-like) (DHDPS-like protein) (Probable 2-keto-4-hydroxyglutarate aldolase) (Probable KHG-aldolase)	Emericella nidulans (strain FGSC A4 / ATCC 38163 / CBS 112.46 / NRRL 194 / M139) (Aspergillus nidulans)	FUNCTION: Catalyzes the final step in the metabolic pathway of hydroxyproline (By similarity). Involved in osmoadaptation. {ECO:0000250}.	309
2083250	2084506	Mb_4556|QLI74468.1	No match	No match	No match	No match	No match
2087345	2087954	Mb_4556|QLI74102.1	B8N0F1	MFS transporter asaE (Aspergillic acid biosynthesis cluster protein E)	Aspergillus flavus (strain ATCC 200026 / FGSC A1120 / IAM 13836 / NRRL 3357 / JCM 12722 / SRRC 167)	FUNCTION: MFS transporter; part of the gene cluster that mediates the biosynthesis of aspergillic acid (PubMed:29674152). Probably involved in aspergillic acid metabolism and transport (PubMed:29674152). {ECO:0000269|PubMed:29674152}.	442
2192551	2193201	Mb_4556|QLI74423.1	No match	No match	No match	No match	No match
2193304	2195449	Mb_4556|QLI74596.1	Q4WVN4	Nonribosomal peptide synthetase 8 (EC 6.3.2.-)	Aspergillus fumigatus (strain ATCC MYA-4609 / CBS 101355 / FGSC A1100 / Af293) (Neosartorya fumigata)	FUNCTION: Nonribosomal peptide synthesis (NRPS) is a key mechanism responsible for the biosynthesis of bioactive metabolites which are potentially contributing to organismal virulence. However, contarary to other nonribosomal peptide synthases, NRPS8 does not encode a secreted peptide, but has more a structural role since it is involved in germ tube formation. {ECO:0000269|PubMed:21746855}.	8515
2195673	2196998	Mb_4556|QLI74197.1	R4WH05	Highly reducing polyketide synthase ACRTS2 (HR-PKS ACRTS2) (EC 2.3.1.-) (ACR-toxin biosynthesis protein S2)	Alternaria alternata (Alternaria rot fungus) (Torula alternata)	FUNCTION: Highly reducing polyketide synthase; part of the gene cluster that mediates the biosynthesis of the host-selective toxins (HSTs) ACR-toxins responsible for brown spot of rough lemon disease by the rough lemon pathotype (PubMed:22835272). ACR-toxins cause uncoupling of mitochondrial oxidative-phosphorylation similar to that of classic protonophore (PubMed:22846083). The structure of the …	2513
2221120	2221724	Mb_4556|QLI74303.1	Q54EW2	Putative bifunctional amine oxidase DDB_G0291301 [Includes: Putative sarcosine oxidase (PSO) (EC 1.5.3.1) (EC 1.5.3.7); Putative L-amino-acid oxidase (EC 1.4.3.2)]	Dictyostelium discoideum (Social amoeba)	FUNCTION: Catalyzes an oxidative deamination of predominantly hydrophobic and aromatic L-amino acids. Metabolizes sarcosine, L-pipecolic acid and L-proline (By similarity). {ECO:0000250}.	1080
2222711	2224459	Mb_4556|QLI74214.1	P10045	Nitrilase, bromoxynil-specific (EC 3.5.5.1)	Klebsiella pneumoniae subsp. ozaenae	FUNCTION: Specific for the herbicide bromoxynil (3,5-dibromo-4-hydroxybenzonitrile); converts it to its metabolite 3,5-dibromo-4-hydroxybenzoic acid.	349
2226602	2227710	Mb_4556|QLI74786.1	No match	No match	No match	No match	No match
2285759	2286160	Mb_4556|QLI74067.1	No match	No match	No match	No match	No match
2289718	2290799	Mb_4556|QLI74466.1	No match	No match	No match	No match	No match
2292315	2296763	Mb_4556|QLI74039.1	No match	No match	No match	No match	No match
2468168	2468771	Mb_4556|QLI74248.1	No match	No match	No match	No match	No match
2468824	2470796	Mb_4556|QLI74714.1	No match	No match	No match	No match	No match
2475599	2477267	Mb_4556|QLI65633.1	No match	No match	No match	No match	No match
2475599	2477267	Mb_4556|QLI74768.1	No match	No match	No match	No match	No match
2479665	2480297	Mb_4556|QLI74612.1	No match	No match	No match	No match	No match
2492588	2493620	Mb_4556|QLI64419.1	No match	No match	No match	No match	No match
2492588	2493620	Mb_4556|QLI74366.1	No match	No match	No match	No match	No match
2499546	2500136	Mb_4556|QLI66367.1	No match	No match	No match	No match	No match
2499546	2500136	Mb_4556|QLI74803.1	No match	No match	No match	No match	No match
2501230	2501846	Mb_4556|QLI74539.1	No match	No match	No match	No match	No match
2505476	2505997	Mb_4556|QLI74193.1	No match	No match	No match	No match	No match
2506450	2506920	Mb_4556|QLI74594.1	No match	No match	No match	No match	No match
2507086	2507705	Mb_4556|QLI74164.1	No match	No match	No match	No match	No match
2509082	2509687	Mb_4556|QLI74256.1	No match	No match	No match	No match	No match
2511294	2513654	Mb_4556|QLI74373.1	No match	No match	No match	No match	No match
2513944	2514903	Mb_4556|QLI74799.1	No match	No match	No match	No match	No match
2515962	2516630	Mb_4556|QLI74407.1	No match	No match	No match	No match	No match
2633193	2634442	Mb_4556|QLI74311.1	No match	No match	No match	No match	No match
2635600	2637126	Mb_4556|QLI74742.1	No match	No match	No match	No match	No match
2641542	2642785	Mb_4556|QLI74254.1	No match	No match	No match	No match	No match
2643576	2645458	Mb_4556|QLI74687.1	No match	No match	No match	No match	No match
2820890	2821420	Mb_4556|QLI74168.1	No match	No match	No match	No match	No match
2821538	2822541	Mb_4556|QLI74252.1	S3D9F1	Highly reducing polyketide synthase gloL (HR-PKS gloL) (EC 2.3.1.-) (Pneumocandin acyl side chain synthase) (Pneumocandin biosynthesis cluster protein L)	Glarea lozoyensis (strain ATCC 20868 / MF5171)	FUNCTION: Highly reducing polyketide synthase; part of the gene cluster that mediates the biosynthesis of pneumocandins, lipohexapeptides of the echinocandin family that prevent fungal cell wall formation by non-competitive inhibition of beta-1,3-glucan synthase (PubMed:23688303, PubMed:27705900). The 10,12-dimethylmyristoyl side chain is synthesized by the reducing polyketide synthase gloL/GLPKS…	2531
Chromosome_CP058933.1
27009	27617	Mb_4556|QLI67319.1	No match	No match	No match	No match	No match
29464	30256	Mb_4556|QLI68481.1	No match	No match	No match	No match	No match
32597	33490	Mb_4556|QLI68603.1	P30759	Arginase-1 (EC 3.5.3.1) (Arginase, hepatic) (Type I arginase)	Xenopus laevis (African clawed frog)		316
37930	38466	Mb_4556|QLI67437.1	S0DQQ0	O-methyltransferase fsr2 (EC 2.1.1.-) (Fusarubin biosynthesis cluster protein 2)	Gibberella fujikuroi (strain CBS 195.34 / IMI 58289 / NRRL A-6831) (Bakanae and foot rot disease fungus) (Fusarium fujikuroi)	FUNCTION: O-methyltransferase; part of the gene cluster that mediates the biosynthesis of fusarubins, highly pigmented naphthoquinones responsible for the coloration of the fruiting bodies (PubMed:22492438, PubMed:23825955). The non-reducing polyketide synthase FSR1 is responsible for the condensation of seven acetyl-CoA units to yield a haptaketide (PubMed:22492438). After rings A and B are form…	387
42313	43218	Mb_4556|QLI67357.1	S0DTP6	Non-reducing polyketide synthase fsr1 (EC 2.3.1.-) (Fusarubin biosynthesis cluster protein 1) (Pigmentless perithecia protein 1) (Polyketide synthase 3)	Gibberella fujikuroi (strain CBS 195.34 / IMI 58289 / NRRL A-6831) (Bakanae and foot rot disease fungus) (Fusarium fujikuroi)	FUNCTION: Non-reducing polyketide synthase; part of the gene cluster that mediates the biosynthesis of fusarubins, highly pigmented naphthoquinones responsible for the coloration of the fruiting bodies (PubMed:22492438, PubMed:23825955). The non-reducing polyketide synthase FSR1 is responsible for the condensation of seven acetyl-CoA units to yield a haptaketide (PubMed:22492438). After rings A a…	2286
43901	45527	Mb_4556|QLI68437.1	S0DTP6	Non-reducing polyketide synthase fsr1 (EC 2.3.1.-) (Fusarubin biosynthesis cluster protein 1) (Pigmentless perithecia protein 1) (Polyketide synthase 3)	Gibberella fujikuroi (strain CBS 195.34 / IMI 58289 / NRRL A-6831) (Bakanae and foot rot disease fungus) (Fusarium fujikuroi)	FUNCTION: Non-reducing polyketide synthase; part of the gene cluster that mediates the biosynthesis of fusarubins, highly pigmented naphthoquinones responsible for the coloration of the fruiting bodies (PubMed:22492438, PubMed:23825955). The non-reducing polyketide synthase FSR1 is responsible for the condensation of seven acetyl-CoA units to yield a haptaketide (PubMed:22492438). After rings A a…	2286
49462	50561	Mb_4556|QLI67834.1	S0DPM1	Cytochrome P450 monooxygenase apf7 (EC 1.-.-.-) (Apicidin F synthesis protein 7)	Gibberella fujikuroi (strain CBS 195.34 / IMI 58289 / NRRL A-6831) (Bakanae and foot rot disease fungus) (Fusarium fujikuroi)	FUNCTION: Cytochrome P450 monooxygenase; part of the gene cluster that mediates the biosynthesis of the cyclic tetrapeptide apicidin F (APF) (PubMed:25058475). The non-ribosomal peptide synthetase apf1 incorporates four different amino acids to produce apicidin F: L-phenylalanine, D-pipecolic acid (D-pip), N-methoxy-L-tryptophan and L-2-aminooctanedioic acid (PubMed:25058475). L-Phenylalanine is …	530
76300	77805	Mb_4556|QLI66844.1	A1DA63	Fumitremorgin C synthase (EC 1.14.19.71) (Fumitremorgin biosynthesis protein E)	Neosartorya fischeri (strain ATCC 1020 / DSM 3700 / CBS 544.65 / FGSC A1164 / JCM 1740 / NRRL 181 / WB 181) (Aspergillus fischerianus)	FUNCTION: Cytochrome P450 monooxygenase; part of the gene cluster that mediates the biosynthesis of fumitremorgins, indole alkaloids that carry not only intriguing chemical structures, but also interesting biological and pharmacological activities (PubMed:23109474). The biosynthesis of fumitremorgin-type alkaloids begins by condensation of the two amino acids L-tryptophan and L-proline to brevian…	526
81467	83278	Mb_4556|QLI66931.1	I1S163	Cytochrome P450 monooxygenase FSL4 (EC 1.-.-.-) (Fusarielin biosynthesis cluster protein 4)	Gibberella zeae (strain ATCC MYA-4620 / CBS 123657 / FGSC 9075 / NRRL 31084 / PH-1) (Wheat head blight fungus) (Fusarium graminearum)	FUNCTION: Cytochrome P450 monooxygenase; part of the gene cluster that mediates the biosynthesis of fusarielins F, G and H, decaketide compounds with 5 methylations and a decaline core that act as mycoestrogens as they stimulate growth of MCF-7 breast cancer cells (PubMed:22252016, PubMed:27983606). The initial compound in the pathway is produced by the reducing polyketide synthase FSL1. FSL1 lac…	557
191530	193730	Mb_4556|QLI66634.1	Q5B8L0	Transcriptional activator of proteases prtT (Zn(2)-C6 zinc finger-containing protein prtT)	Emericella nidulans (strain FGSC A4 / ATCC 38163 / CBS 112.46 / NRRL 194 / M139) (Aspergillus nidulans)	FUNCTION: Transcription factor required for protein utilization and degradation. Regulates transcription of major secreted proteases (By similarity). {ECO:0000250}.	660
194801	195037	Mb_4556|QLI68337.1	No match	No match	No match	No match	No match
196689	196961	Mb_4556|QLI68069.1	No match	No match	No match	No match	No match
277653	279095	Mb_4556|QLI67638.1	P0CT41	Transposon Tf2-12 polyprotein (Retrotransposable element Tf2 155 kDa protein)	Schizosaccharomyces pombe (strain 972 / ATCC 24843) (Fission yeast)		1333
277653	279095	Mb_4556|QLI71179.1	P0CT41	Transposon Tf2-12 polyprotein (Retrotransposable element Tf2 155 kDa protein)	Schizosaccharomyces pombe (strain 972 / ATCC 24843) (Fission yeast)		1333
342220	342927	Mb_4556|QLI67002.1	No match	No match	No match	No match	No match
345686	346734	Mb_4556|QLI68001.1	No match	No match	No match	No match	No match
408119	408974	Mb_4556|QLI68241.1	No match	No match	No match	No match	No match
410832	411356	Mb_4556|QLI67155.1	No match	No match	No match	No match	No match
470303	471163	Mb_4556|QLI66912.1	No match	No match	No match	No match	No match
473247	474062	Mb_4556|QLI66535.1	Q4WAZ3	Dioxygenase af480 (EC 1.14.11.82) (5-dehydro-6-demethoxyfumagillol dioxygenase) (Fumagillin biosynthesis cluster C-6 hydroxylase) (Fma-C6H)	Aspergillus fumigatus (strain ATCC MYA-4609 / CBS 101355 / FGSC A1100 / Af293) (Neosartorya fumigata)	FUNCTION: Dioxygenase; part of the gene cluster that mediates the biosynthesis of fumagillin, a meroterpenoid that has numerous biological activities including irreversible inhibition of human type 2 methionine aminopeptidase (METAP2) (PubMed:23488861, PubMed:24568283). Within the pathway, the dioxygenase af480 acts as a 5-dehydro-6-demethoxyfumagillol dioxygenase that hydroylates 5-keto-demethox…	309
476254	477261	Mb_4556|QLI67423.1	D4AU26	Dioxygenase swnH1 (EC 1.14.11.-) (Swainsonine biosynthesis gene cluster protein H1)	Arthroderma benhamiae (strain ATCC MYA-4681 / CBS 112371) (Trichophyton mentagrophytes)	FUNCTION: Dioxygenase; part of the gene cluster that mediates the biosynthesis of swainsonine (SW), a cytotoxic fungal alkaloid and a potential cancer therapy drug (PubMed:28381497). Swainsonine production occurs via a multibranched pathway and is dispensable for fungal colonization of plants and infection of insect hosts (By similarity). The first step of swainsonine biosynthesis is the producti…	307
510547	513369	Mb_4556|QLI68206.1	Q4WAZ0	Dual-functional monooxygenase/methyltransferase psoF (EC 1.-.-.-) (EC 2.1.1.-) (Pseurotin biosynthesis protein F)	Aspergillus fumigatus (strain ATCC MYA-4609 / CBS 101355 / FGSC A1100 / Af293) (Neosartorya fumigata)	FUNCTION: Dual-functional monooxygenase/methyltransferase; part of the gene cluster that mediates the biosynthesis of pseurotin A, a competitive inhibitor of chitin synthase and an inducer of nerve-cell proliferation (PubMed:24082142, PubMed:24939566). The PKS-NRPS hybrid synthetase psoA is responsible for the biosynthesis of azaspirene, one of the first intermediates having the 1-oxa-7-azaspiro[…	905
514958	515925	Mb_4556|QLI67801.1	Q5SBL1	Methyltransferase fsdD (EC 2.1.1.-) (Fusaridione A biosynthesis protein D)	Fusarium heterosporum	FUNCTION: Methyltransferase; part of the gene cluster that mediates the biosynthesis of fusaridione A, a bright yellow trans-fused decalin-containing tetramic acid with antimicrobial activity (PubMed:23614392). The PKS module of fsdS catalyzes the formation of the polyketide unit which is then conjugated to L-tyrosine by the condensation domain of the fsdS NRPS module. Activity of the Dieckmann c…	284
516672	517674	Mb_4556|QLI66978.1	Q4WB03	Glutathione S-transferase psoE (EC 2.5.1.-) (Pseurotin biosynthesis protein E)	Aspergillus fumigatus (strain ATCC MYA-4609 / CBS 101355 / FGSC A1100 / Af293) (Neosartorya fumigata)	FUNCTION: Glutathione S-transferase; part of the gene cluster that mediates the biosynthesis of pseurotin A, a competitive inhibitor of chitin synthase and an inducer of nerve-cell proliferation (PubMed:24082142, PubMed:24939566). The PKS-NRPS hybrid synthetase psoA is responsible for the biosynthesis of azaspirene, one of the first intermediates having the 1-oxa-7-azaspiro[4,4]-non-2-ene-4,6-dio…	237
522236	522787	Mb_4556|QLI66566.1	No match	No match	No match	No match	No match
527015	528536	Mb_4556|QLI68283.1	Q5ATJ7	Non-reducing polyketide synthase ausA (EC 2.3.1.-) (Austinoid biosynthesis clusters protein A) (Methylorcinaldehyde synthase ausA)	Emericella nidulans (strain FGSC A4 / ATCC 38163 / CBS 112.46 / NRRL 194 / M139) (Aspergillus nidulans)	FUNCTION: Non-reducing polyketide synthase; part of the gene cluster A that mediates the biosynthesis of austinol and dehydroaustinol, two fungal meroterpenoids (PubMed:22329759). The first step of the pathway is the synthesis of 3,5-dimethylorsellinic acid by the polyketide synthase ausA (PubMed:22329759). 3,5-dimethylorsellinic acid is then prenylated by the polyprenyl transferase ausN (PubMed:…	2476
528774	529661	Mb_4556|QLI67043.1	No match	No match	No match	No match	No match
531016	532879	Mb_4556|QLI68207.1	B6HJU0	Efflux pump roqT (Roquefortine/meleagrin synthesis protein T)	Penicillium rubens (strain ATCC 28089 / DSM 1075 / NRRL 1951 / Wisconsin 54-1255) (Penicillium chrysogenum)	FUNCTION: Efflux pump; part of the gene cluster that mediates the biosynthesis of the mycotoxins roquefortine C and meleagrin (PubMed:22118684). {ECO:0000269|PubMed:22118684}.	539
554033	555039	Mb_4556|QLI66488.1	No match	No match	No match	No match	No match
555722	556678	Mb_4556|QLI67706.1	No match	No match	No match	No match	No match
557383	558015	Mb_4556|QLI66557.1	No match	No match	No match	No match	No match
559365	560699	Mb_4556|QLI67485.1	No match	No match	No match	No match	No match
561220	561912	Mb_4556|QLI68564.1	No match	No match	No match	No match	No match
562013	563503	Mb_4556|QLI67561.1	No match	No match	No match	No match	No match
564800	565466	Mb_4556|QLI66414.1	No match	No match	No match	No match	No match
670568	670906	Mb_4556|QLI67774.1	P40974	Putrescine oxidase (EC 1.4.3.10)	Kocuria rosea (Deinococcus erythromyxa) (Micrococcus rubens)		478
673618	674994	Mb_4556|QLI67685.1	No match	No match	No match	No match	No match
769789	771198	Mb_4556|QLI67713.1	No match	No match	No match	No match	No match
771929	773302	Mb_4556|QLI67963.1	No match	No match	No match	No match	No match
818023	819011	Mb_4556|QLI67169.1	D4AU26	Dioxygenase swnH1 (EC 1.14.11.-) (Swainsonine biosynthesis gene cluster protein H1)	Arthroderma benhamiae (strain ATCC MYA-4681 / CBS 112371) (Trichophyton mentagrophytes)	FUNCTION: Dioxygenase; part of the gene cluster that mediates the biosynthesis of swainsonine (SW), a cytotoxic fungal alkaloid and a potential cancer therapy drug (PubMed:28381497). Swainsonine production occurs via a multibranched pathway and is dispensable for fungal colonization of plants and infection of insect hosts (By similarity). The first step of swainsonine biosynthesis is the producti…	307
820161	821627	Mb_4556|QLI68254.1	E9F8M0	Transmembrane transporter swnT (Swainsonine biosynthesis gene cluster protein T)	Metarhizium robertsii (strain ARSEF 23 / ATCC MYA-3075) (Metarhizium anisopliae (strain ARSEF 23))	FUNCTION: Transmembrane transporter; part of the gene cluster that mediates the biosynthesis of swainsonine, a cytotoxic fungal alkaloid and a potential cancer therapy drug (PubMed:28381497). Does not mediate the secretion of SW and the exact role of swnT in SW biosynthesis remains to be determined (PubMed:32786262). {ECO:0000269|PubMed:28381497, ECO:0000269|PubMed:32786262}.	496
869074	869514	Mb_4556|QLI66537.1	No match	No match	No match	No match	No match
871511	872224	Mb_4556|QLI67764.1	No match	No match	No match	No match	No match
877044	877828	Mb_4556|QLI67215.1	No match	No match	No match	No match	No match
877883	878341	Mb_4556|QLI68299.1	No match	No match	No match	No match	No match
928323	930167	Mb_4556|QLI67733.1	No match	No match	No match	No match	No match
931401	932725	Mb_4556|QLI67657.1	No match	No match	No match	No match	No match
933999	934314	Mb_4556|QLI66818.1	No match	No match	No match	No match	No match
1062861	1063619	Mb_4556|QLI68150.1	No match	No match	No match	No match	No match
1065281	1067402	Mb_4556|QLI67059.1	No match	No match	No match	No match	No match
1070914	1071785	Mb_4556|QLI66824.1	P50842	2-dehydro-3-deoxy-D-gluconate 5-dehydrogenase (EC 1.1.1.127) (2-keto-3-deoxygluconate 5-dehydrogenase) (2-keto-3-deoxygluconate oxidoreductase) (KDG oxidoreductase)	Bacillus subtilis (strain 168)	FUNCTION: Catalyzes the reduction of 2,5-diketo-3-deoxygluconate (DKII or 4,6-dihydroxy-2,5-dioxohexanoate) into 2-keto-3-deoxygluconate (KDG or 2-dehydro-3-deoxygluconate) with a concomitant oxidation of NADH. {ECO:0000250}.	254
1072712	1074040	Mb_4556|QLI67989.1	Q54E41	2-Hydroxyacid oxidase (HAOX) (EC 1.1.3.15) (Glycolate oxidase) (GOX)	Dictyostelium discoideum (Social amoeba)	FUNCTION: Catalyzes the oxidation of glycolate to glyoxylate, with a reduction of O2 to H2O2. May use other 2-hydroxyacids as substrates. {ECO:0000250|UniProtKB:P05414}.	388
1456261	1458644	Mb_4556|QLI67570.1	No match	No match	No match	No match	No match
1459226	1460227	Mb_4556|QLI67797.1	P35587	Hypodermin-A (HA) (EC 3.4.21.-)	Hypoderma lineatum (Early cattle grub) (Common cattle grub)	FUNCTION: Specificity, limited to carboxyl side of arginine residue in B-chain of insulin.	256
2336156	2337076	Mb_4556|QLI68491.1	Q4KJX9	Agmatine deiminase (EC 3.5.3.12) (Agmatine iminohydrolase)	Pseudomonas fluorescens (strain ATCC BAA-477 / NRRL B-23932 / Pf-5)	FUNCTION: Mediates the hydrolysis of agmatine into N-carbamoylputrescine in the arginine decarboxylase (ADC) pathway of putrescine biosynthesis, a basic polyamine. {ECO:0000255|HAMAP-Rule:MF_01841}.	368
2342062	2343773	Mb_4556|QLI66648.1	D4AK94	Uncharacterized secreted protein ARB_04696	Arthroderma benhamiae (strain ATCC MYA-4681 / CBS 112371) (Trichophyton mentagrophytes)		512
2752685	2753824	Mb_4556|QLI66489.1	No match	No match	No match	No match	No match
2757667	2758032	Mb_4556|QLI66713.1	No match	No match	No match	No match	No match
2847534	2848490	Mb_4556|QLI66969.1	No match	No match	No match	No match	No match
2849542	2850039	Mb_4556|QLI68123.1	No match	No match	No match	No match	No match
3455498	3456079	Mb_4556|QLI67145.1	No match	No match	No match	No match	No match
3458847	3459173	Mb_4556|QLI66630.1	No match	No match	No match	No match	No match
3588783	3589148	Mb_4556|QLI66451.1	No match	No match	No match	No match	No match
3589868	3590750	Mb_4556|QLI68527.1	No match	No match	No match	No match	No match
5182171	5184751	Mb_4556|QLI66422.1	P28584	Low-affinity potassium transport protein	Saccharomyces cerevisiae (strain ATCC 204508 / S288c) (Baker's yeast)	FUNCTION: This protein is required for low-affinity potassium transport.	889
5185069	5186076	Mb_4556|QLI67481.1	C4JUE5	Sphingomyelinase D (SMase D) (EC 3.1.4.41)	Uncinocarpus reesii (strain UAMH 1704)	FUNCTION: Catalyzes the hydrolysis of sphingomyelin. Sphingomyelinases D are produced by some spider in their venoms, but also by arthropods such as ticks, or pathogenic bacteria and fungi. They might play a role in pathogenicity through different mechanisms, such as membrane destabilization and host cell penetration, but also pulmonary inflammation and cutaneous lesions. {ECO:0000250|UniProtKB:B…	349
5397119	5398801	Mb_4556|QLI68381.1	Q87CC5	Glucans biosynthesis glucosyltransferase H (EC 2.4.1.-)	Xylella fastidiosa (strain Temecula1 / ATCC 700964)	FUNCTION: Involved in the biosynthesis of osmoregulated periplasmic glucans (OPGs). {ECO:0000255|HAMAP-Rule:MF_01072}.	638
5399521	5400098	Mb_4556|QLI67144.1	No match	No match	No match	No match	No match
5401567	5403346	Mb_4556|QLI68302.1	No match	No match	No match	No match	No match
5403374	5404072	Mb_4556|QLI68517.1	No match	No match	No match	No match	No match
5404279	5405812	Mb_4556|QLI66518.1	No match	No match	No match	No match	No match
5406243	5406455	Mb_4556|QLI66767.1	No match	No match	No match	No match	No match
5406677	5407264	Mb_4556|QLI67856.1	No match	No match	No match	No match	No match
5407665	5408816	Mb_4556|QLI66695.1	B6A878	Toxin subunit YenA2	Yersinia entomophaga	FUNCTION: Part of an orally active toxin complex (TC) with strong insecticidal effects on larvae of the Coleoptera Costelytra zealandica, Acrossidius tasmania and Adoryphorus couloni and some Lepidoptera larvae (PubMed:21278295, PubMed:22158901). The TC has an endochitinase activity (PubMed:21278295) (Probable). {ECO:0000269|PubMed:21278295, ECO:0000269|PubMed:22158901, ECO:0000305|PubMed:2215890…	1364
6041670	6042035	Mb_4556|QLI67012.1	No match	No match	No match	No match	No match
6044855	6045532	Mb_4556|QLI68249.1	No match	No match	No match	No match	No match
6047074	6049008	Mb_4556|QLI67091.1	P39932	Sugar transporter STL1	Saccharomyces cerevisiae (strain ATCC 204508 / S288c) (Baker's yeast)		569
6359446	6361425	Mb_4556|QLI67741.1	Q08347	Alkyl/aryl-sulfatase BDS1 (EC 3.1.6.-) (Bacterially-derived sulfatase 1)	Saccharomyces cerevisiae (strain ATCC 204508 / S288c) (Baker's yeast)	FUNCTION: Alkyl/aryl-sulfatase. Enables the use of SDS and 4-nitrocatechol as sulfur source. {ECO:0000269|PubMed:15947202}.	646
6364658	6369095	Mb_4556|QLI66663.1	P39109	Metal resistance protein YCF1 (ABC-type Cd(2+) transporter) (EC 7.2.2.2) (ABC-type glutathione-S-conjugate transporter) (EC 7.6.2.3) (Yeast cadmium factor 1)	Saccharomyces cerevisiae (strain ATCC 204508 / S288c) (Baker's yeast)	FUNCTION: Cooperates for the ATP-dependent vacuolar transport of bilirubin and glutathione conjugates. {ECO:0000269|PubMed:10790694, ECO:0000269|PubMed:8626454}.	1515
6428303	6429457	Mb_4556|QLI67244.1	P33182	Phosphoenolpyruvate phosphomutase (PEP mutase) (PEP phosphomutase) (Phosphoenolpyruvate mutase) (EC 5.4.2.9)	Tetrahymena pyriformis	FUNCTION: Formation of a carbon-phosphorus bond by converting phosphoenolpyruvate (PEP) to phosphonopyruvate (P-Pyr).	300
6430618	6432109	Mb_4556|QLI68328.1	O42652	Aspartate aminotransferase, cytoplasmic (EC 2.6.1.1) (Transaminase A)	Schizosaccharomyces pombe (strain 972 / ATCC 24843) (Fission yeast)	FUNCTION: Plays a key role in amino acid metabolism. {ECO:0000250}.	409
6522554	6523300	Mb_4556|QLI68099.1	No match	No match	No match	No match	No match
6524425	6524992	Mb_4556|QLI67008.1	No match	No match	No match	No match	No match
6527595	6527993	Mb_4556|QLI68013.1	No match	No match	No match	No match	No match
6556512	6557979	Mb_4556|QLI68532.1	B8N0F1	MFS transporter asaE (Aspergillic acid biosynthesis cluster protein E)	Aspergillus flavus (strain ATCC 200026 / FGSC A1120 / IAM 13836 / NRRL 3357 / JCM 12722 / SRRC 167)	FUNCTION: MFS transporter; part of the gene cluster that mediates the biosynthesis of aspergillic acid (PubMed:29674152). Probably involved in aspergillic acid metabolism and transport (PubMed:29674152). {ECO:0000269|PubMed:29674152}.	442
6558905	6559648	Mb_4556|QLI67373.1	No match	No match	No match	No match	No match
6559782	6561521	Mb_4556|QLI66776.1	No match	No match	No match	No match	No match
6563002	6564622	Mb_4556|QLI67243.1	Q5AUZ9	Cytochrome P450 monooxygenase atnE (EC 1.-.-.-) (Aspercryptin biosynthesis cluster protein E)	Emericella nidulans (strain FGSC A4 / ATCC 38163 / CBS 112.46 / NRRL 194 / M139) (Aspergillus nidulans)	FUNCTION: Cytochrome P450 monooxygenase; part of the gene cluster that mediates the biosynthesis of aspercryptins, linear lipopeptides built from six amino acids including 2 highly unusual and nonproteogenic amino acids, 2-amino-octanoic acid (2aoa) and 2-amino-dodecanol (2adol) (PubMed:23248299, PubMed:27310134, PubMed:26563584). The core structure of aspercryptins is as follows: Ser/Ala-Thr-Ile…	518
6565832	6567131	Mb_4556|QLI68405.1	No match	No match	No match	No match	No match
6568886	6570532	Mb_4556|QLI68495.1	No match	No match	No match	No match	No match
6626159	6628245	Mb_4556|QLI67776.1	No match	No match	No match	No match	No match
6630172	6631470	Mb_4556|QLI67131.1	No match	No match	No match	No match	No match
6633346	6633673	Mb_4556|QLI68289.1	No match	No match	No match	No match	No match
6638448	6640344	Mb_4556|QLI68214.1	No match	No match	No match	No match	No match
6817184	6817925	Mb_4556|QLI66678.1	No match	No match	No match	No match	No match
6819876	6821436	Mb_4556|QLI67837.1	No match	No match	No match	No match	No match
6822023	6822307	Mb_4556|QLI68368.1	No match	No match	No match	No match	No match
6823843	6824961	Mb_4556|QLI67287.1	No match	No match	No match	No match	No match
6826844	6828253	Mb_4556|QLI67636.1	No match	No match	No match	No match	No match
6889956	6890615	Mb_4556|QLI66527.1	No match	No match	No match	No match	No match
6891620	6892027	Mb_4556|QLI67604.1	No match	No match	No match	No match	No match
6902577	6903169	Mb_4556|QLI66936.1	No match	No match	No match	No match	No match
6904193	6904525	Mb_4556|QLI67239.1	E4USP0	Extracellular metalloprotease MGYG_03559 (EC 3.4.24.-)	Arthroderma gypseum (strain ATCC MYA-4604 / CBS 118893) (Microsporum gypseum)	FUNCTION: Secreted metalloproteinase that allows assimilation of proteinaceous substrates. Plays a pivotal role as a pathogenicity determinant during infections and contributes to the ability of the pathogen to persist within the mammalian host (By similarity). {ECO:0000250}.	275
7010804	7012405	Mb_4556|QLI67079.1	No match	No match	No match	No match	No match
7013236	7015815	Mb_4556|QLI66937.1	No match	No match	No match	No match	No match
7019021	7019632	Mb_4556|QLI68502.1	No match	No match	No match	No match	No match
7186076	7188688	Mb_4556|QLI67768.1	Q9P6I9	Uncharacterized transcriptional regulatory protein C1683.13c	Schizosaccharomyces pombe (strain 972 / ATCC 24843) (Fission yeast)		618
7191963	7195301	Mb_4556|QLI67771.1	No match	No match	No match	No match	No match
7232331	7233212	Mb_4556|QLI68212.1	No match	No match	No match	No match	No match
7233399	7236647	Mb_4556|QLI67888.1	O81027	Hydroxymethylglutaryl-CoA lyase, mitochondrial (HL) (HMG-CoA lyase) (EC 4.1.3.4) (3-hydroxy-3-methylglutarate-CoA lyase)	Arabidopsis thaliana (Mouse-ear cress)	FUNCTION: Involved in the catabolism of branched amino acids such as leucine. {ECO:0000305}.	468
7273601	7273933	Mb_4556|QLI66728.1	No match	No match	No match	No match	No match
7274959	7276913	Mb_4556|QLI67972.1	Q4WR83	Acyl-CoA ligase sidI (EC 6.2.1.-) (Siderophore biosynthesis protein I)	Aspergillus fumigatus (strain ATCC MYA-4609 / CBS 101355 / FGSC A1100 / Af293) (Neosartorya fumigata)	FUNCTION: Acyl-CoA ligase; part of the siderophore biosynthetic pathway (PubMed:22106303). Aspergillus fumigatus produces 4 types of siderophores, low-molecular-mass iron chelators, including excreted fusarinine C (FsC) and triacetylfusarinine C (TAFC) for iron uptake and intacellular ferricrocin (FC) for hyphal and hydroxyferricrocin (HFC) for conidial iron distribution and storage. TAFC consist…	590
7277279	7279264	Mb_4556|QLI66802.1	Q9V9A7	Probable methylcrotonoyl-CoA carboxylase beta chain, mitochondrial (MCCase subunit beta) (EC 6.4.1.4) (3-methylcrotonyl-CoA carboxylase 2) (3-methylcrotonyl-CoA carboxylase non-biotin-containing subunit) (3-methylcrotonyl-CoA:carbon dioxide ligase subunit beta)	Drosophila melanogaster (Fruit fly)	FUNCTION: Carboxyltransferase subunit of the 3-methylcrotonyl-CoA carboxylase, an enzyme that catalyzes the conversion of 3-methylcrotonyl-CoA to 3-methylglutaconyl-CoA, a critical step for leucine and isovaleric acid catabolism (By similarity). Vital for adult survival. {ECO:0000250}.	578
7279420	7281819	Mb_4556|QLI67712.1	Q58626	Pyruvate carboxylase subunit A (EC 6.4.1.1) (Pyruvic carboxylase A)	Methanocaldococcus jannaschii (strain ATCC 43067 / DSM 2661 / JAL-1 / JCM 10045 / NBRC 100440) (Methanococcus jannaschii)	FUNCTION: Pyruvate carboxylase catalyzes a 2-step reaction, involving the ATP-dependent carboxylation of the covalently attached biotin in the first step and the transfer of the carboxyl group to pyruvate in the second. {ECO:0000269|PubMed:11195096}.	501
7282236	7283834	Mb_4556|QLI66562.1	Q50LG2	Acyl-CoA dehydrogenase AFT10-1 (EC 1.-.-.-) (AF-toxin biosynthesis protein 10-1)	Alternaria alternata (Alternaria rot fungus) (Torula alternata)	FUNCTION: Acyl-CoA dehydrogenase; part of the gene clusters that mediate the biosynthesis of the host-selective toxins (HSTs) AF-toxins responsible for Alternaria black spot of strawberry disease by the strawberry pathotype (Ref.1). AF-toxin I and III are valine derivatives of 2,3-dyhydroxy-isovaleric acid and 2-hydroxy-isovaleric acid respectively, while AF II is an isoleucine derivative of 2-hy…	432
7302295	7304658	Mb_4556|QLI66638.1	Q9P7J8	Serine/threonine-protein kinase gad8 (EC 2.7.11.1)	Schizosaccharomyces pombe (strain 972 / ATCC 24843) (Fission yeast)	FUNCTION: Involved in a signaling module for sexual development and cell growth under stressed conditions. Required for G1 arrest under nitrogen starvation and for growth at high temperature and osmolarity. {ECO:0000269|PubMed:12805221}.	569
7309563	7310738	Mb_4556|QLI67880.1	Q5AV04	Aminotransferase atnJ (EC 2.6.1.-) (Aspercryptin biosynthesis cluster protein J)	Emericella nidulans (strain FGSC A4 / ATCC 38163 / CBS 112.46 / NRRL 194 / M139) (Aspergillus nidulans)	FUNCTION: Aminotransferase; part of the gene cluster that mediates the biosynthesis of aspercryptins, linear lipopeptides built from six amino acids including 2 highly unusual and nonproteogenic amino acids, 2-amino-octanoic acid (2aoa) and 2-amino-dodecanol (2adol) (PubMed:23248299, PubMed:27310134, PubMed:26563584). The core structure of aspercryptins is as follows: Ser/Ala-Thr-Ile/Val-2aoa-Asn…	348
7312142	7313147	Mb_4556|QLI66792.1	A0A2Z5TTA9	Efflux pump himE (Himeic acid A biosynthesis cluster protein E)	Aspergillus japonicus	FUNCTION: Efflux pump that is probably involved in the efflux of himeic acid A, a ubiquitin-activating enzyme (E1) inhibitor. {ECO:0000305|PubMed:29314577}.	321
7314563	7316225	Mb_4556|QLI67962.1	Q5AUZ9	Cytochrome P450 monooxygenase atnE (EC 1.-.-.-) (Aspercryptin biosynthesis cluster protein E)	Emericella nidulans (strain FGSC A4 / ATCC 38163 / CBS 112.46 / NRRL 194 / M139) (Aspergillus nidulans)	FUNCTION: Cytochrome P450 monooxygenase; part of the gene cluster that mediates the biosynthesis of aspercryptins, linear lipopeptides built from six amino acids including 2 highly unusual and nonproteogenic amino acids, 2-amino-octanoic acid (2aoa) and 2-amino-dodecanol (2adol) (PubMed:23248299, PubMed:27310134, PubMed:26563584). The core structure of aspercryptins is as follows: Ser/Ala-Thr-Ile…	518
7316993	7321786	Mb_4556|QLI66880.1	P78615	Fatty acid synthase subunit alpha (EC 2.3.1.86) [Includes: Acyl carrier; 3-oxoacyl-[acyl-carrier-protein] reductase (EC 1.1.1.100) (Beta-ketoacyl reductase); 3-oxoacyl-[acyl-carrier-protein] synthase (EC 2.3.1.41) (Beta-ketoacyl synthase)]	Emericella nidulans (Aspergillus nidulans)	FUNCTION: Fatty acid synthetase catalyzes the formation of long-chain fatty acids from acetyl-CoA, malonyl-CoA and NADPH. The alpha subunit contains domains for: acyl carrier protein, 3-oxoacyl-[acyl-carrier-protein] reductase, and 3-oxoacyl-[acyl-carrier-protein] synthase. {ECO:0000269|PubMed:8962148}.	1858
7323449	7324774	Mb_4556|QLI68042.1	S0DPL8	Apicidin F cluster transcription factor apf2 (Apicidin F synthesis protein 2)	Gibberella fujikuroi (strain CBS 195.34 / IMI 58289 / NRRL A-6831) (Bakanae and foot rot disease fungus) (Fusarium fujikuroi)	FUNCTION: Transcription factor that regulates the expression of the gene cluster that mediates the biosynthesis of apicidin F (PubMed:23825955, PubMed:25058475). Binds to the eight-base-pair motif 5'-TGACGTGA-3' called the 'Api-box' that is found in all promoters of the apicidin F cluster except in the promoter region of apf2 itself (PubMed:25058475). {ECO:0000269|PubMed:23825955, ECO:0000269|Pub…	389
7355168	7356046	Mb_4556|QLI68092.1	Q5AV06	Probable thioesterase atnL (EC 2.3.1.-) (Aspercryptin biosynthesis cluster protein L)	Emericella nidulans (strain FGSC A4 / ATCC 38163 / CBS 112.46 / NRRL 194 / M139) (Aspergillus nidulans)	FUNCTION: Part of the gene cluster that mediates the biosynthesis of aspercryptins, linear lipopeptides built from six amino acids including 2 highly unusual and nonproteogenic amino acids, 2-amino-octanoic acid (2aoa) and 2-amino-dodecanol (2adol) (PubMed:23248299, PubMed:27310134, PubMed:26563584). The core structure of aspercryptins is as follows: Ser/Ala-Thr-Ile/Val-2aoa-Asn-2adol (PubMed:273…	306
7357460	7363971	Mb_4556|QLI67230.1	P34229	Fatty acid synthase subunit beta (EC 2.3.1.86) [Includes: 3-hydroxyacyl-[acyl-carrier-protein] dehydratase (EC 4.2.1.59); Enoyl-[acyl-carrier-protein] reductase [NADH] (EC 1.3.1.9); [Acyl-carrier-protein] acetyltransferase (EC 2.3.1.38); [Acyl-carrier-protein] malonyltransferase (EC 2.3.1.39); S-acyl fatty acid synthase thioesterase (EC 3.1.2.14)]	Yarrowia lipolytica (strain CLIB 122 / E 150) (Yeast) (Candida lipolytica)	FUNCTION: Fatty acid synthetase catalyzes the formation of long-chain fatty acids from acetyl-CoA, malonyl-CoA and NADPH. The beta subunit contains domains for: [acyl-carrier-protein] acetyltransferase and malonyltransferase, S-acyl fatty acid synthase thioesterase, enoyl-[acyl-carrier-protein] reductase, and 3-hydroxypalmitoyl-[acyl-carrier-protein] dehydratase.	2086
7364411	7364764	Mb_4556|QLI68313.1	No match	No match	No match	No match	No match
7465785	7471580	Mb_4556|QLI68625.1	No match	No match	No match	No match	No match
7472918	7476320	Mb_4556|QLI67461.1	A6NGH8	Ankyrin repeat domain-containing protein 61	Homo sapiens (Human)		418
Chromosome_CP058935.1
2965	5697	Mb_4556|QLI71214.1	No match	No match	No match	No match	No match
7275	10064	Mb_4556|QLI70471.1	No match	No match	No match	No match	No match
12227	12838	Mb_4556|QLI71168.1	No match	No match	No match	No match	No match
13648	14798	Mb_4556|QLI70423.1	No match	No match	No match	No match	No match
15528	15881	Mb_4556|QLI71120.1	No match	No match	No match	No match	No match
15992	16472	Mb_4556|QLI70378.1	Q5Z5S6	Ent-kaurene oxidase-like 5 (OsKOL5) (EC 1.14.13.-) (Cytochrome P450 701A9) (Ent-kaurene oxidase 5) (OsKO5) (OsKOS2)	Oryza sativa subsp. japonica (Rice)	FUNCTION: May hydroxylate diterpenes. {ECO:0000305|PubMed:22247270}.	503
25717	27540	Mb_4556|QLI70317.1	I3R7F1	Propionyl-CoA carboxylase, carboxyltransferase subunit (PCC) (EC 6.4.1.3)	Haloferax mediterranei (strain ATCC 33500 / DSM 1411 / JCM 8866 / NBRC 14739 / NCIMB 2177 / R-4) (Halobacterium mediterranei)	FUNCTION: Part of the propionyl coenzyme A carboxylase (PCC) complex involved in propionate utilization and in the production of the poly(3-hydroxybutyrate-co-3-hydroxyvalerate)(PHBV), which is a water-insoluble biopolymer used as intracellular energy reserve material when cells grow under conditions of nutrient limitation. The complex catalyzes the carboxylation of propionyl-CoA to methylmalonyl…	516
27974	29970	Mb_4556|QLI71047.1	Q9HES8	Pyruvate carboxylase (EC 6.4.1.1) (Pyruvic carboxylase) (PCB)	Aspergillus niger	FUNCTION: Pyruvate carboxylase catalyzes a 2-step reaction, involving the ATP-dependent carboxylation of the covalently attached biotin in the first step and the transfer of the carboxyl group to pyruvate in the second. {ECO:0000250}.	1192
32604	33859	Mb_4556|QLI70271.1	No match	No match	No match	No match	No match
165219	165652	Mb_4556|QLI70637.1	No match	No match	No match	No match	No match
166234	167370	Mb_4556|QLI71441.1	No match	No match	No match	No match	No match
169819	170871	Mb_4556|QLI70691.1	No match	No match	No match	No match	No match
180411	182327	Mb_4556|QLI70181.1	Q08347	Alkyl/aryl-sulfatase BDS1 (EC 3.1.6.-) (Bacterially-derived sulfatase 1)	Saccharomyces cerevisiae (strain ATCC 204508 / S288c) (Baker's yeast)	FUNCTION: Alkyl/aryl-sulfatase. Enables the use of SDS and 4-nitrocatechol as sulfur source. {ECO:0000269|PubMed:15947202}.	646
185876	186052	Mb_4556|QLI70863.1	No match	No match	No match	No match	No match
253324	254088	Mb_4556|QLI71288.1	No match	No match	No match	No match	No match
257377	257850	Mb_4556|QLI70784.1	No match	No match	No match	No match	No match
258865	260957	Mb_4556|QLI70608.1	Q0CNV1	Pyruvate decarboxylase (EC 4.1.1.1)	Aspergillus terreus (strain NIH 2624 / FGSC A1156)		569
361696	364317	Mb_4556|QLI70370.1	No match	No match	No match	No match	No match
364854	366995	Mb_4556|QLI71111.1	P15245	Phenol hydroxylase (PHHY) (EC 1.14.13.7)	Cutaneotrichosporon cutaneum (Yeast) (Trichosporon cutaneum)	FUNCTION: Hydroxylates phenol to catechol (PubMed:1429434, PubMed:4146224, PubMed:3203745, PubMed:2022646, PubMed:7858421, PubMed:7851397, PubMed:11591156). Phenol is the best substrate, but the enzyme also accepts isomeric diphenols, hydroxyl-, amino-, halogen- or methyl-substituted phenols and, to a lesser degree, cresols (PubMed:4146224, PubMed:17425111, PubMed:7851397). {ECO:0000269|PubMed:11…	665
370774	376813	Mb_4556|QLI70385.1	P19838	Nuclear factor NF-kappa-B p105 subunit (DNA-binding factor KBF1) (EBP-1) (Nuclear factor of kappa light polypeptide gene enhancer in B-cells 1) [Cleaved into: Nuclear factor NF-kappa-B p50 subunit]	Homo sapiens (Human)	FUNCTION: NF-kappa-B is a pleiotropic transcription factor present in almost all cell types and is the endpoint of a series of signal transduction events that are initiated by a vast array of stimuli related to many biological processes such as inflammation, immunity, differentiation, cell growth, tumorigenesis and apoptosis. NF-kappa-B is a homo- or heterodimeric complex formed by the Rel-like d…	968
381278	381820	Mb_4556|QLI70277.1	No match	No match	No match	No match	No match
397855	399646	Mb_4556|QLI70134.1	C8V329	Purine-cytosine permease fcyB (PCP fcyB) (Cytosine/purine transport protein fcyB) (Fluorocytosine resistance protein fcyB)	Emericella nidulans (strain FGSC A4 / ATCC 38163 / CBS 112.46 / NRRL 194 / M139) (Aspergillus nidulans)	FUNCTION: This permease has a broad specificity towards purines, and also transports cytosine, but neither uracil nor thymine. Contributes very little in purine uptake. Its major role may be the uptake of cytosine. {ECO:0000269|PubMed:18384518}.	508
402615	404286	Mb_4556|QLI70864.1	No match	No match	No match	No match	No match
493464	494130	Mb_4556|QLI70804.1	No match	No match	No match	No match	No match
495942	498003	Mb_4556|QLI71431.1	P96712	Multidrug resistance protein 3 (Multidrug-efflux transporter 3)	Bacillus subtilis (strain 168)	FUNCTION: Confers resistance to puromycin, tosufloxacin and norfloxacin. {ECO:0000269|PubMed:9023234}.	512
501898	503650	Mb_4556|QLI71378.1	S0DPM1	Cytochrome P450 monooxygenase apf7 (EC 1.-.-.-) (Apicidin F synthesis protein 7)	Gibberella fujikuroi (strain CBS 195.34 / IMI 58289 / NRRL A-6831) (Bakanae and foot rot disease fungus) (Fusarium fujikuroi)	FUNCTION: Cytochrome P450 monooxygenase; part of the gene cluster that mediates the biosynthesis of the cyclic tetrapeptide apicidin F (APF) (PubMed:25058475). The non-ribosomal peptide synthetase apf1 incorporates four different amino acids to produce apicidin F: L-phenylalanine, D-pipecolic acid (D-pip), N-methoxy-L-tryptophan and L-2-aminooctanedioic acid (PubMed:25058475). L-Phenylalanine is …	530
505155	506359	Mb_4556|QLI70683.1	No match	No match	No match	No match	No match
507427	508522	Mb_4556|QLI71318.1	Q5AV06	Probable thioesterase atnL (EC 2.3.1.-) (Aspercryptin biosynthesis cluster protein L)	Emericella nidulans (strain FGSC A4 / ATCC 38163 / CBS 112.46 / NRRL 194 / M139) (Aspergillus nidulans)	FUNCTION: Part of the gene cluster that mediates the biosynthesis of aspercryptins, linear lipopeptides built from six amino acids including 2 highly unusual and nonproteogenic amino acids, 2-amino-octanoic acid (2aoa) and 2-amino-dodecanol (2adol) (PubMed:23248299, PubMed:27310134, PubMed:26563584). The core structure of aspercryptins is as follows: Ser/Ala-Thr-Ile/Val-2aoa-Asn-2adol (PubMed:273…	306
528687	529769	Mb_4556|QLI71153.1	No match	No match	No match	No match	No match
530463	531434	Mb_4556|QLI70406.1	No match	No match	No match	No match	No match
540703	542935	Mb_4556|QLI71245.1	No match	No match	No match	No match	No match
544174	549223	Mb_4556|QLI70496.1	No match	No match	No match	No match	No match
551411	552985	Mb_4556|QLI71380.1	No match	No match	No match	No match	No match
570101	571639	Mb_4556|QLI70566.1	No match	No match	No match	No match	No match
572683	573597	Mb_4556|QLI71320.1	No match	No match	No match	No match	No match
577503	577877	Mb_4556|QLI70632.1	No match	No match	No match	No match	No match
578757	580921	Mb_4556|QLI71232.1	No match	No match	No match	No match	No match
582869	584887	Mb_4556|QLI70295.1	No match	No match	No match	No match	No match
582869	584887	Mb_4556|QLI70359.1	No match	No match	No match	No match	No match
585847	588858	Mb_4556|QLI71205.1	No match	No match	No match	No match	No match
624818	626260	Mb_4556|QLI67638.1	P0CT41	Transposon Tf2-12 polyprotein (Retrotransposable element Tf2 155 kDa protein)	Schizosaccharomyces pombe (strain 972 / ATCC 24843) (Fission yeast)		1333
624818	626260	Mb_4556|QLI71179.1	P0CT41	Transposon Tf2-12 polyprotein (Retrotransposable element Tf2 155 kDa protein)	Schizosaccharomyces pombe (strain 972 / ATCC 24843) (Fission yeast)		1333
676660	680896	Mb_4556|QLI71149.1	P18160	Dual specificity protein kinase splA (EC 2.7.10.2) (Non-receptor tyrosine kinase spore lysis A) (Tyrosine-protein kinase 1)	Dictyostelium discoideum (Social amoeba)	FUNCTION: Essential for spore differentiation.	2410
680987	683090	Mb_4556|QLI70954.1	No match	No match	No match	No match	No match
693197	694438	Mb_4556|QLI70124.1	D4B387	Glutathione hydrolase proenzyme (EC 3.4.19.13) (Gamma-glutamyltransferase ARB_02921) (EC 2.3.2.2) (Gamma-glutamyltranspeptidase) (Gamma-GT) (Leukotriene-C4 hydrolase) (EC 3.4.19.14) [Cleaved into: Glutathione hydrolase heavy chain; Glutathione hydrolase light chain]	Arthroderma benhamiae (strain ATCC MYA-4681 / CBS 112371) (Trichophyton mentagrophytes)	FUNCTION: Cleaves the gamma-glutamyl bond of extracellular glutathione (gamma-Glu-Cys-Gly), glutathione conjugates, and other gamma-glutamyl compounds. The metabolism of glutathione releases free glutamate and the dipeptide cysteinyl-glycine, which is hydrolyzed to cysteine and glycine by dipeptidases. In the presence of high concentrations of dipeptides and some amino acids, can also catalyze a …	584
695696	696163	Mb_4556|QLI70916.1	No match	No match	No match	No match	No match
703097	704374	Mb_4556|QLI70746.1	No match	No match	No match	No match	No match
705522	706415	Mb_4556|QLI71432.1	A2QK68	FAD-binding monooxygenase ktnD (EC 1.14.13.-) (Kotanin biosynthesis cluster protein D)	Aspergillus niger (strain ATCC MYA-4892 / CBS 513.88 / FGSC A1513)	FUNCTION: Non-reducing polyketide synthase; part of the gene cluster that mediates the biosynthesis of the bicoumarin kotanin (PubMed:22945023, PubMed:26389790). The non-reducing polyketide synthase ktnS first catalyzes the formation of the pentaketidic 4,7-dihydroxy-5-methylcoumarin from acetyl coenzyme A and 4 malonyl coenzyme A molecules (PubMed:17315249, PubMed:22945023). Further O-methylatio…	608
726216	727277	Mb_4556|QLI70989.1	No match	No match	No match	No match	No match
727881	728396	Mb_4556|QLI70305.1	No match	No match	No match	No match	No match
838571	841607	Mb_4556|QLI70473.1	No match	No match	No match	No match	No match
842814	844832	Mb_4556|QLI70295.1	No match	No match	No match	No match	No match
842814	844832	Mb_4556|QLI70359.1	No match	No match	No match	No match	No match
846779	848943	Mb_4556|QLI70841.1	No match	No match	No match	No match	No match
849823	850197	Mb_4556|QLI70971.1	No match	No match	No match	No match	No match
854130	855044	Mb_4556|QLI70708.1	No match	No match	No match	No match	No match
856092	857714	Mb_4556|QLI70501.1	No match	No match	No match	No match	No match
873596	874228	Mb_4556|QLI70148.1	No match	No match	No match	No match	No match
876484	878071	Mb_4556|QLI70284.1	No match	No match	No match	No match	No match
882650	883438	Mb_4556|QLI70415.1	No match	No match	No match	No match	No match
884138	885831	Mb_4556|QLI70548.1	No match	No match	No match	No match	No match
885863	886465	Mb_4556|QLI70726.1	No match	No match	No match	No match	No match
886776	891042	Mb_4556|QLI70894.1	Q196V4	Uncharacterized protein 106R	Invertebrate iridescent virus 3 (IIV-3) (Mosquito iridescent virus)		473
891180	892337	Mb_4556|QLI71246.1	No match	No match	No match	No match	No match
893761	894588	Mb_4556|QLI70544.1	No match	No match	No match	No match	No match
905966	906714	Mb_4556|QLI71426.1	No match	No match	No match	No match	No match
906775	908856	Mb_4556|QLI70679.1	No match	No match	No match	No match	No match
1040942	1042599	Mb_4556|QLI70477.1	L8GD75	Subtilisin-like protease 3 (EC 3.4.21.-) (Destructin-3) (Serine protease 3) (PdSP3)	Pseudogymnoascus destructans (strain ATCC MYA-4855 / 20631-21) (Bat white-nose syndrome fungus) (Geomyces destructans)	FUNCTION: Secreted subtilisin-like serine endopeptidase (PubMed:25944934). Mediates the degradation of collagen, the major structural protein in the mammalian host. Degrades the nonhelical regions of collagen that function in the cross-linking of the helical components (By similarity). May function as virulence factor involved in epidermal wing necrosis observed in white nose syndrome (WNS) in ba…	404
1043323	1045398	Mb_4556|QLI71220.1	Q9D3J5	Ankyrin repeat domain-containing protein 22	Mus musculus (Mouse)		191
1054637	1055212	Mb_4556|QLI71112.1	B6HE56	Putative glutathione-dependent formaldehyde-activating enzyme (EC 4.4.1.22) (S-(hydroxymethyl)glutathione synthase)	Penicillium rubens (strain ATCC 28089 / DSM 1075 / NRRL 1951 / Wisconsin 54-1255) (Penicillium chrysogenum)	FUNCTION: Catalyzes the condensation of formaldehyde and glutathione to S-hydroxymethylglutathione. {ECO:0000255|HAMAP-Rule:MF_03142}.	191
1057878	1058416	Mb_4556|QLI70462.1	Q9GV41	9,11-endoperoxide prostaglandin H2 reductase (EC 1.1.1.-) (Prostaglandin F2-alpha synthase)	Trypanosoma brucei brucei	FUNCTION: Catalyzes the NADP-dependent formation of prostaglandin F2-alpha from prostaglandin H2. Has also aldo/ketoreductase activity towards the synthetic substrates 9,10-phenanthrenequinone and p-nitrobenzaldehyde. {ECO:0000269|PubMed:11067881}.	276
1091460	1094228	Mb_4556|QLI70735.1	No match	No match	No match	No match	No match
1096054	1104757	Mb_4556|QLI71331.1	B6A878	Toxin subunit YenA2	Yersinia entomophaga	FUNCTION: Part of an orally active toxin complex (TC) with strong insecticidal effects on larvae of the Coleoptera Costelytra zealandica, Acrossidius tasmania and Adoryphorus couloni and some Lepidoptera larvae (PubMed:21278295, PubMed:22158901). The TC has an endochitinase activity (PubMed:21278295) (Probable). {ECO:0000269|PubMed:21278295, ECO:0000269|PubMed:22158901, ECO:0000305|PubMed:2215890…	1364
1522728	1523153	Mb_4556|QLI71193.1	No match	No match	No match	No match	No match
1526071	1527501	Mb_4556|QLI71091.1	P05085	Arginine metabolism regulation protein II (Arginine-requiring protein 81)	Saccharomyces cerevisiae (strain ATCC 204508 / S288c) (Baker's yeast)	FUNCTION: With ARG80, ARG82 and MCM1, coordinates the expression of arginine anabolic and catabolic genes in response to arginine. {ECO:0000269|PubMed:2274024, ECO:0000269|PubMed:3298999}.	880
1547086	1548872	Mb_4556|QLI70595.1	A3R044	Sulfite efflux pump SSU1	Arthroderma benhamiae (strain ATCC MYA-4681 / CBS 112371) (Trichophyton mentagrophytes)	FUNCTION: Sulphite efflux pump required for the secretion of sulphite as a reducing agent. In the presence of sulphite, cystine in keratin is directly cleaved to cysteine and S-sulphocysteine, and thereby, reduced proteins become accessible to hydrolysis by a variety of secreted endo- and exoproteases. Excretion of sulphite mediated by an efflux pump represents also an detoxification pathway for …	375
1551449	1552698	Mb_4556|QLI70929.1	No match	No match	No match	No match	No match
2658202	2658825	Mb_4556|QLI71382.1	No match	No match	No match	No match	No match
2659461	2660213	Mb_4556|QLI70186.1	Q2TXI3	Protein fmp52-2, mitochondrial	Aspergillus oryzae (strain ATCC 42149 / RIB 40) (Yellow koji mold)		229
2662948	2664000	Mb_4556|QLI70786.1	P0CT50	Salicylate decarboxylase (EC 4.1.1.91) (Salicylic acid decarboxylase)	Cutaneotrichosporon moniliiforme (Yeast) (Trichosporon moniliiforme)	FUNCTION: Reversibly catalyzes the regioselective carboxylation of phenol to form salicylic acid. Involved in a pathway for the degradation of salicylate via phenol. Also catalyzes the decarboxylation of beta-resorcylic acid (2,4-dihydroxybenzoic acid) into resorcinol (1,3-dihydroxybenzene), gamma-resorcylic acid (2,6-dihydroxybenzoic acid) into resorcinol, 2,3-dihydroxybenzoic acid into catechol…	350
3021206	3022060	Mb_4556|QLI71219.1	No match	No match	No match	No match	No match
3022765	3023835	Mb_4556|QLI70560.1	No match	No match	No match	No match	No match
3370878	3372694	Mb_4556|QLI70436.1	Q99385	Vacuolar calcium ion transporter (High copy number undoes manganese protein 1) (Manganese resistance 1 protein) (Vacuolar Ca(2+)/H(+) exchanger)	Saccharomyces cerevisiae (strain ATCC 204508 / S288c) (Baker's yeast)	FUNCTION: Has a role in promoting intracellular calcium ion sequestration via the exchange of calcium ions for hydrogen ions across the vacuolar membrane. Involved also in manganese ion homeostasis via its uptake into the vacuole. {ECO:0000269|PubMed:8628289, ECO:0000269|PubMed:8668190}.	411
3376733	3378129	Mb_4556|QLI71178.1	No match	No match	No match	No match	No match
3455021	3455353	Mb_4556|QLI71018.1	No match	No match	No match	No match	No match
3456499	3457025	Mb_4556|QLI71171.1	No match	No match	No match	No match	No match
3644304	3645524	Mb_4556|QLI70293.1	No match	No match	No match	No match	No match
3645582	3646433	Mb_4556|QLI70974.1	No match	No match	No match	No match	No match
3649109	3649808	Mb_4556|QLI70937.1	No match	No match	No match	No match	No match
3776495	3777956	Mb_4556|QLI70130.1	P9WLM0	Uncharacterized protein MT2089	Mycobacterium tuberculosis (strain CDC 1551 / Oshkosh)		681
3780330	3781160	Mb_4556|QLI70857.1	No match	No match	No match	No match	No match
3789799	3791279	Mb_4556|QLI70809.1	P06873	Proteinase K (EC 3.4.21.64) (Endopeptidase K) (Tritirachium alkaline proteinase)	Parengyodontium album (Tritirachium album)	FUNCTION: Hydrolyzes keratin at aromatic and hydrophobic residues.	384
3793072	3794079	Mb_4556|QLI71126.1	No match	No match	No match	No match	No match
3795933	3796931	Mb_4556|QLI71257.1	O31788	Serine protease AprX (EC 3.4.21.-)	Bacillus subtilis (strain 168)	FUNCTION: Displays serine protease activity. Seems to have a broad substrate specificity. {ECO:0000269|PubMed:17884659}.	442
3797400	3797783	Mb_4556|QLI70388.1	No match	No match	No match	No match	No match
3832217	3832558	Mb_4556|QLI70949.1	No match	No match	No match	No match	No match
3834218	3834574	Mb_4556|QLI70220.1	No match	No match	No match	No match	No match
3837621	3837951	Mb_4556|QLI70480.1	No match	No match	No match	No match	No match
3841426	3842634	Mb_4556|QLI70421.1	No match	No match	No match	No match	No match
3880970	3881470	Mb_4556|QLI70659.1	No match	No match	No match	No match	No match
3883181	3883630	Mb_4556|QLI71405.1	C8VP36	6-phosphogluconate dehydrogenase, decarboxylating (EC 1.1.1.44)	Emericella nidulans (strain FGSC A4 / ATCC 38163 / CBS 112.46 / NRRL 194 / M139) (Aspergillus nidulans)	FUNCTION: Catalyzes the oxidative decarboxylation of 6-phosphogluconate to ribulose 5-phosphate and CO(2), with concomitant reduction of NADP to NADPH. {ECO:0000250}.	496
3883660	3884552	Mb_4556|QLI70604.1	C8VP36	6-phosphogluconate dehydrogenase, decarboxylating (EC 1.1.1.44)	Emericella nidulans (strain FGSC A4 / ATCC 38163 / CBS 112.46 / NRRL 194 / M139) (Aspergillus nidulans)	FUNCTION: Catalyzes the oxidative decarboxylation of 6-phosphogluconate to ribulose 5-phosphate and CO(2), with concomitant reduction of NADP to NADPH. {ECO:0000250}.	496
4198095	4198406	Mb_4556|QLI70542.1	No match	No match	No match	No match	No match
4199126	4200013	Mb_4556|QLI70407.1	No match	No match	No match	No match	No match
4201410	4203782	Mb_4556|QLI70887.1	No match	No match	No match	No match	No match
4209493	4210782	Mb_4556|QLI71022.1	Q5AUW8	Tyrosinase-like protein orsC (EC 1.14.-.-) (Orsellinic acid/F9775 biosynthesis cluster protein C)	Emericella nidulans (strain FGSC A4 / ATCC 38163 / CBS 112.46 / NRRL 194 / M139) (Aspergillus nidulans)	FUNCTION: Tyrosinase-like protein; part of the gene cluster that mediates the biosynthesis of orsellinic acid, as well as of the cathepsin K inhibitors F9775 A and F9775 B (PubMed:19666480, PubMed:20174687). The non-reducing polyketide synthase orsA produces orsellinic acid by condensing acetyl-CoA with 3 malonyl-CoA units (PubMed:19666480, PubMed:20174687). Further modifications by the decarboxy…	369
4211528	4212512	Mb_4556|QLI71472.1	No match	No match	No match	No match	No match
4252516	4253499	Mb_4556|QLI70184.1	No match	No match	No match	No match	No match
4253947	4254867	Mb_4556|QLI70824.1	No match	No match	No match	No match	No match
4255918	4256943	Mb_4556|QLI70225.1	No match	No match	No match	No match	No match
4279728	4281497	Mb_4556|QLI71088.1	Q5Z5S6	Ent-kaurene oxidase-like 5 (OsKOL5) (EC 1.14.13.-) (Cytochrome P450 701A9) (Ent-kaurene oxidase 5) (OsKO5) (OsKOS2)	Oryza sativa subsp. japonica (Rice)	FUNCTION: May hydroxylate diterpenes. {ECO:0000305|PubMed:22247270}.	503
4282232	4283661	Mb_4556|QLI70633.1	No match	No match	No match	No match	No match
4284290	4289572	Mb_4556|QLI70807.1	Q6F5E3	Aspyridones efflux protein	Neocamarosporium betae (Beet black rot fungus) (Pleospora betae)	FUNCTION: Efflux pump that may be involved in the secretion of leporins (PubMed:14745177). {ECO:0000305|PubMed:14745177}.	564
4435313	4436289	Mb_4556|QLI70845.1	A0A0U1LQF6	Transacylase cctO (EC 2.3.1.-) (Cyclochlorotine biosynthesis protein O)	Talaromyces islandicus (Penicillium islandicum)	FUNCTION: Transacylase; part of the gene cluster that mediates the biosynthesis of the mycotoxin cyclochlorotine, a hepatotoxic and carcinogenic cyclic chlorinated pentapeptide (PubMed:26954535, PubMed:33736433). Within the pathway, cctO catalyzes the intramolecular O,N-transacylation from isocyclochlorotine to cyclochlorotine (PubMed:33736433). The NRPS cctN initially catalyzes the condensation …	300
4437580	4438007	Mb_4556|QLI70345.1	No match	No match	No match	No match	No match
4443550	4446132	Mb_4556|QLI70465.1	No match	No match	No match	No match	No match
4448999	4449547	Mb_4556|QLI70418.1	No match	No match	No match	No match	No match
4454577	4455662	Mb_4556|QLI70374.1	No match	No match	No match	No match	No match
4457632	4459236	Mb_4556|QLI71064.1	No match	No match	No match	No match	No match
4518390	4520213	Mb_4556|QLI70114.1	P37967	Para-nitrobenzyl esterase (EC 3.1.1.-) (Intracellular esterase B) (PNB carboxy-esterase) (PNBCE)	Bacillus subtilis (strain 168)	FUNCTION: Catalyzes hydrolysis of several beta-lactam antibiotic PNB esters to the corresponding free acid and PNB alcohol.	489
4521282	4522740	Mb_4556|QLI70843.1	No match	No match	No match	No match	No match
4526511	4526816	Mb_4556|QLI70491.1	No match	No match	No match	No match	No match
Chromosome_CP058934.1
27071	28909	Mb_4556|QLI69704.1	Q68FU4	Succinate--hydroxymethylglutarate CoA-transferase (EC 2.8.3.13) (SuccinylCoA:glutarate-CoA transferase)	Rattus norvegicus (Rat)	FUNCTION: Catalyzes the succinyl-CoA-dependent conversion of glutarate to glutaryl-CoA. Can use different dicarboxylic acids as CoA acceptors, the preferred ones are glutarate, succinate, adipate, and 3-hydroxymethylglutarate (By similarity). {ECO:0000250}.	436
31319	33133	Mb_4556|QLI69653.1	Q54EW2	Putative bifunctional amine oxidase DDB_G0291301 [Includes: Putative sarcosine oxidase (PSO) (EC 1.5.3.1) (EC 1.5.3.7); Putative L-amino-acid oxidase (EC 1.4.3.2)]	Dictyostelium discoideum (Social amoeba)	FUNCTION: Catalyzes an oxidative deamination of predominantly hydrophobic and aromatic L-amino acids. Metabolizes sarcosine, L-pipecolic acid and L-proline (By similarity). {ECO:0000250}.	1080
43701	45051	Mb_4556|QLI69292.1	M1WCQ3	Nonribosomal peptide synthetase tcpP (NRPS tcpP) (EC 6.3.2.-) (Thioclapurine biosynthesis protein P)	Claviceps purpurea (strain 20.1) (Ergot fungus) (Sphacelia segetum)	FUNCTION: Nonribosomal peptide synthetase; part of the gene cluster that mediates the biosynthesis of an unusual class of epipolythiodioxopiperazines (ETPs) lacking the reactive thiol group important for toxicity (PubMed:27390873). Firstly, L-tyrosine is prenylated by tcpD, before undergoing condensation with L-glycine in a reaction catalyzed by the NRPS tcpP leading to the diketopiperazine (DKP)…	2049
45978	49923	Mb_4556|QLI70004.1	Q6Q883	Nonribosomal peptide synthetase sirP (NRPS sirP) (EC 6.3.2.-) (Sirodesmin biosynthesis protein P)	Leptosphaeria maculans (Blackleg fungus) (Phoma lingam)	FUNCTION: Nonribosomal peptide synthetase; part of the gene cluster that mediates the biosynthesis of sirodesmin PL, an epipolythiodioxopiperazine (ETP) characterized by a disulfide bridged cyclic dipeptide and that acts as a phytotoxin which is involved in the blackleg didease of canola (PubMed:15387811, PubMed:18272357, PubMed:19762440). SirD catalyzes the O-prenylation of L-tyrosine (L-Tyr) in…	2176
68361	70165	Mb_4556|QLI69189.1	A0A1R3RGJ7	Cytochrome P450 monooxygenase otaC (EC 1.14.14.-) (Ochratoxin A biosynthesis cluster protein C)	Aspergillus carbonarius (strain ITEM 5010)	FUNCTION: Cytochrome P450 monooxygenase; part of the gene cluster that mediates the biosynthesis of ochratoxin A (OTA), a mycotoxin composed of a chlorinated type I polyketide dihydroisocoumarin moiety linked to L-phenylalanine, and demonstrated to have nephrotoxic, immunotoxic, genotoxic, neurotoxic, and teratogenic properties (PubMed:30054361). OtaC catalyzes the oxidation of 7-methylmellein (7…	516
73949	75734	Mb_4556|QLI69143.1	A0A0B4GDU5	Scytalone dehydratase-like protein Arp1 (EC 4.2.1.-)	Metarhizium brunneum (strain ARSEF 3297)	FUNCTION: Scytalone dehydratase-like protein; part of the Pks2 gene cluster that mediates the formation of infectious structures (appressoria), enabling these fungi to kill insects faster (PubMed:29958281). The product of the Pks2 gene cluster is different from the one of Pks1 and has still not been identified (PubMed:29958281). {ECO:0000269|PubMed:29958281}.	744
77482	77775	Mb_4556|QLI69854.1	No match	No match	No match	No match	No match
113915	114907	Mb_4556|QLI69858.1	Q7S4Z6	Probable squalene synthase (SQS) (SS) (EC 2.5.1.21) (FPP:FPP farnesyltransferase) (Farnesyl-diphosphate farnesyltransferase)	Neurospora crassa (strain ATCC 24698 / 74-OR23-1A / CBS 708.71 / DSM 1257 / FGSC 987)	FUNCTION: Catalyzes the condensation of 2 two farnesyl pyrophosphate moieties to form squalene. It is the first committed enzyme of the sterol biosynthesis pathway. Required for the biosynthesis of ergosterol (By similarity). {ECO:0000250}.	481
115504	116239	Mb_4556|QLI69194.1	Q92887	ATP-binding cassette sub-family C member 2 (EC 7.6.2.-) (EC 7.6.2.2) (EC 7.6.2.3) (Canalicular multidrug resistance protein) (Canalicular multispecific organic anion transporter 1) (Multidrug resistance-associated protein 2)	Homo sapiens (Human)	FUNCTION: ATP-dependent transporter of the ATP-binding cassette (ABC) family that binds and hydrolyzes ATP to enable active transport of various substrates including many drugs, toxicants and endogenous compound across cell membranes. Transports a wide variety of conjugated organic anions such as sulfate-, glucuronide- and glutathione (GSH)-conjugates of endo- and xenobiotics substrates (PubMed:1…	1545
131127	131582	Mb_4556|QLI69353.1	K3VDP2	Nonribosomal peptide synthetase 32 (NRPS 32) (EC 6.3.2.-) (W493 A and B biosynthesis cluster protein NRPS320)	Fusarium pseudograminearum (strain CS3096) (Wheat and barley crown-rot fungus)	FUNCTION: Nonribosomal peptide synthetase; part of the gene cluster that mediates the biosynthesis of the lipopeptides W493 A and B (PubMed:25412204). W493 A and B consist of six amino acid residues D-allo-thr, L-Ala, D-Ala, L-Gln, D-Tyr, and L-Val/L-Ile linked to a 3-hydroxy-4-methyltetradecanoic acid polyketide chain (PubMed:25412204). The biosynthesis starts with formation of the linear polyke…	8892
136278	137885	Mb_4556|QLI68764.1	Q4WR17	Cytochrome P450 monooxygenase helB1 (EC 1.-.-.-) (Helvolic acid biosynthesis cluster protein B1)	Aspergillus fumigatus (strain ATCC MYA-4609 / CBS 101355 / FGSC A1100 / Af293) (Neosartorya fumigata)	FUNCTION: Cytochrome P450 monooxygenase; part of the gene cluster that mediates the biosynthesis of helvolic acid, an antibacterial nortriterpenoid (PubMed:19415934, PubMed:19216560, PubMed:29158519). Protostadienol synthase helA cyclizes (3S)-oxidosqualene to (17Z)-protosta-17(20),24-dien-3-beta-ol (protostadienol)(PubMed:19415934, PubMed:19216560, PubMed:29158519). The synthesis of protostadien…	580
138730	140346	Mb_4556|QLI69513.1	Q4WR22	Cytochrome P450 monooxygenase helB4 (EC 1.-.-.-) (Helvolic acid biosynthesis cluster protein B4)	Aspergillus fumigatus (strain ATCC MYA-4609 / CBS 101355 / FGSC A1100 / Af293) (Neosartorya fumigata)	FUNCTION: Cytochrome P450 monooxygenase; part of the gene cluster that mediates the biosynthesis of helvolic acid, an antibacterial nortriterpenoid (PubMed:19415934, PubMed:19216560, PubMed:29158519). Protostadienol synthase helA cyclizes (3S)-oxidosqualene to (17Z)-protosta-17(20),24-dien-3-beta-ol (protostadienol)(PubMed:19415934, PubMed:19216560, PubMed:29158519). The synthesis of protostadien…	504
141590	143845	Mb_4556|QLI68920.1	E4V6I8	Protostadienol synthase A (EC 5.4.99.32)	Arthroderma gypseum (strain ATCC MYA-4604 / CBS 118893) (Microsporum gypseum)	FUNCTION: Protostadienol synthase which cyclizes (3S)-oxidosqualene to (17Z)-protosta-17(20),24-dien-3-beta-ol (protostadienol), the biosynthetic precursor of helvolic acid, a secondary metabolite which promotes virulence. {ECO:0000250}.	735
144851	145648	Mb_4556|QLI69668.1	Q4WR19	Short chain dehydrogenase helC (EC 1.1.1.-) (Helvolic acid biosynthesis cluster protein helC)	Aspergillus fumigatus (strain ATCC MYA-4609 / CBS 101355 / FGSC A1100 / Af293) (Neosartorya fumigata)	FUNCTION: Short chain dehydrogenase; part of the gene cluster that mediates the biosynthesis of helvolic acid, an antibacterial nortriterpenoid (PubMed:19415934, PubMed:19216560, PubMed:29158519). Protostadienol synthase helA cyclizes (3S)-oxidosqualene to (17Z)-protosta-17(20),24-dien-3-beta-ol (protostadienol)(PubMed:19415934, PubMed:19216560, PubMed:29158519). The synthesis of protostadienol i…	257
145844	147430	Mb_4556|QLI68866.1	Q4WR18	Cytochrome P450 monooxygenase helB2 (EC 1.-.-.-) (Helvolic acid biosynthesis cluster protein B2)	Aspergillus fumigatus (strain ATCC MYA-4609 / CBS 101355 / FGSC A1100 / Af293) (Neosartorya fumigata)	FUNCTION: Cytochrome P450 monooxygenase; part of the gene cluster that mediates the biosynthesis of helvolic acid, an antibacterial nortriterpenoid (PubMed:19415934, PubMed:19216560, PubMed:29158519). Protostadienol synthase helA cyclizes (3S)-oxidosqualene to (17Z)-protosta-17(20),24-dien-3-beta-ol (protostadienol)(PubMed:19415934, PubMed:19216560, PubMed:29158519). The synthesis of protostadien…	507
148300	149760	Mb_4556|QLI69621.1	Q4WR23	Acyltransferase helD2 (EC 2.3.1.-) (Helvolic acid biosynthesis cluster protein D2)	Aspergillus fumigatus (strain ATCC MYA-4609 / CBS 101355 / FGSC A1100 / Af293) (Neosartorya fumigata)	FUNCTION: Acyltransferase; part of the gene cluster that mediates the biosynthesis of helvolic acid, an antibacterial nortriterpenoid (PubMed:19415934, PubMed:19216560, PubMed:29158519). Protostadienol synthase helA cyclizes (3S)-oxidosqualene to (17Z)-protosta-17(20),24-dien-3-beta-ol (protostadienol)(PubMed:19415934, PubMed:19216560, PubMed:29158519). The synthesis of protostadienol is followed…	463
150021	151760	Mb_4556|QLI69019.1	Q4WR24	3-ketosteroid 1-dehydrogenase helE (EC 1.3.-.-) (Helvolic acid biosynthesis cluster protein E)	Aspergillus fumigatus (strain ATCC MYA-4609 / CBS 101355 / FGSC A1100 / Af293) (Neosartorya fumigata)	FUNCTION: 3-ketosteroid 1-dehydrogenase; part of the gene cluster that mediates the biosynthesis of helvolic acid, an antibacterial nortriterpenoid (PubMed:19415934, PubMed:19216560, PubMed:29158519). Protostadienol synthase helA cyclizes (3S)-oxidosqualene to (17Z)-protosta-17(20),24-dien-3-beta-ol (protostadienol)(PubMed:19415934, PubMed:19216560, PubMed:29158519). The synthesis of protostadien…	596
152636	154108	Mb_4556|QLI69776.1	Q4WR21	Acyltransferase helD1 (EC 2.3.1.-) (Helvolic acid biosynthesis cluster protein D1)	Aspergillus fumigatus (strain ATCC MYA-4609 / CBS 101355 / FGSC A1100 / Af293) (Neosartorya fumigata)	FUNCTION: Acyltransferase; part of the gene cluster that mediates the biosynthesis of helvolic acid, an antibacterial nortriterpenoid (PubMed:19415934, PubMed:19216560, PubMed:29158519). Protostadienol synthase helA cyclizes (3S)-oxidosqualene to (17Z)-protosta-17(20),24-dien-3-beta-ol (protostadienol)(PubMed:19415934, PubMed:19216560, PubMed:29158519). The synthesis of protostadienol is followed…	478
154320	155951	Mb_4556|QLI69831.1	Q4WR20	Cytochrome P450 monooxygenase helB3 (EC 1.-.-.-) (Helvolic acid biosynthesis cluster protein B3)	Aspergillus fumigatus (strain ATCC MYA-4609 / CBS 101355 / FGSC A1100 / Af293) (Neosartorya fumigata)	FUNCTION: Cytochrome P450 monooxygenase; part of the gene cluster that mediates the biosynthesis of helvolic acid, an antibacterial nortriterpenoid (PubMed:19415934, PubMed:19216560, PubMed:29158519). Protostadienol synthase helA cyclizes (3S)-oxidosqualene to (17Z)-protosta-17(20),24-dien-3-beta-ol (protostadienol)(PubMed:19415934, PubMed:19216560, PubMed:29158519). The synthesis of protostadien…	507
177046	177457	Mb_4556|QLI69121.1	No match	No match	No match	No match	No match
181826	183862	Mb_4556|QLI69478.1	Q0WQJ7	Kinesin-like protein KIN-5B (AtKRP125a)	Arabidopsis thaliana (Mouse-ear cress)	FUNCTION: Responsible for microtubule translocation. May be important for the organization of phragmoplast-specific arrays of microtubules (By similarity). Plays an essential role in stabilizing the mitotic spindle. Required during mitotic cytokinesis (By similarity). {ECO:0000250|UniProtKB:F4IIS5, ECO:0000250|UniProtKB:O23826}.	1039
208387	211389	Mb_4556|QLI69004.1	A7XRY0	Didemethylasterriquinone D synthetase tdiA (EC 2.3.1.-) (Nonribosomal peptide synthase tdiA) (Terrequinone biosynthesis protein A)	Emericella nidulans (strain FGSC A4 / ATCC 38163 / CBS 112.46 / NRRL 194 / M139) (Aspergillus nidulans)	FUNCTION: Didemethylasterriquinone D synthetase; part of the gene cluster that mediates the biosynthesis of terrequinone A, an antitumor agent (PubMed:17704773, PubMed:16426969, PubMed:17291795, PubMed:22083274). The first step in the biosynthetic pathway for terrequinone A is formation of indole pyruvic acid (IPA) from L-tryptophan by the aminotransferase tdiD (PubMed:17704773). The nonribosomal…	970
212369	213884	Mb_4556|QLI69758.1	L0MXX3	O-methyltransferase PaMT (EC 2.1.1.-) (Fusicoccin A biosynthetic gene clusters protein 8)	Phomopsis amygdali (Fusicoccum amygdali)	FUNCTION: O-methyltransferase; part of the 2 gene clusters that mediate the biosynthesis of fusicoccins, diterpene glucosides that display phytohormone-like activity and function as potent activators of plasma membrane H(+)-ATPases in plants by modifying 14-3-3 proteins and cause the plant disease constriction canker (PubMed:22870285). The first step in the pathway is performed by the fusicoccadi…	427
214097	214672	Mb_4556|QLI68957.1	No match	No match	No match	No match	No match
255605	256786	Mb_4556|QLI69936.1	No match	No match	No match	No match	No match
259235	260528	Mb_4556|QLI69990.1	No match	No match	No match	No match	No match
304680	305110	Mb_4556|QLI69260.1	No match	No match	No match	No match	No match
307829	308626	Mb_4556|QLI69208.1	No match	No match	No match	No match	No match
589228	589812	Mb_4556|QLI69396.1	P47232	Biphenyl-2,3-diol 1,2-dioxygenase 2 (EC 1.13.11.39) (2,3-dihydroxybiphenyl dioxygenase II) (DHBD II) (23OHBP oxygenase II) (Biphenyl-2,3-diol 1,2-dioxygenase II)	Rhodococcus globerulus		190
592555	593121	Mb_4556|QLI69986.1	No match	No match	No match	No match	No match
595131	595472	Mb_4556|QLI68746.1	No match	No match	No match	No match	No match
630939	631634	Mb_4556|QLI69420.1	No match	No match	No match	No match	No match
636192	636659	Mb_4556|QLI68646.1	No match	No match	No match	No match	No match
699751	700388	Mb_4556|QLI69856.1	No match	No match	No match	No match	No match
701051	701476	Mb_4556|QLI69099.1	No match	No match	No match	No match	No match
704379	705893	Mb_4556|QLI69803.1	No match	No match	No match	No match	No match
709558	711948	Mb_4556|QLI69190.1	Q59LV8	Activator of stress genes protein 1	Candida albicans (strain SC5314 / ATCC MYA-2876) (Yeast)	FUNCTION: Transcription factor necessary to sustain growth on non-fermentative carbon sources such as sodium acetate, acetic acid, or ethanol. Plays a role in hyphal formation. {ECO:0000269|PubMed:18451058, ECO:0000269|PubMed:22073120}.	990
753074	753493	Mb_4556|QLI70042.1	No match	No match	No match	No match	No match
754922	755369	Mb_4556|QLI69179.1	No match	No match	No match	No match	No match
767789	768572	Mb_4556|QLI69784.1	No match	No match	No match	No match	No match
768895	771816	Mb_4556|QLI68963.1	No match	No match	No match	No match	No match
791642	793297	Mb_4556|QLI69009.1	No match	No match	No match	No match	No match
794513	795025	Mb_4556|QLI69761.1	No match	No match	No match	No match	No match
795595	795945	Mb_4556|QLI68742.1	No match	No match	No match	No match	No match
860100	861348	Mb_4556|QLI69694.1	F4JLE5	Phosphatidylinositol/phosphatidylcholine transfer protein SFH1 (Phosphatidylinositol transfer protein 1) (AtPITP1) (Protein CAN OF WORMS1) (Protein SEC FOURTEEN HOMOLOGS 1) (AtSFH1) (Protein SHORT ROOT HAIR 1)	Arabidopsis thaliana (Mouse-ear cress)	FUNCTION: Required for transport of secretory proteins from the Golgi complex (By similarity). Catalyzes the transfer of phosphatidylinositol and phosphatidylcholine between membranes in vitro. Plays a role in root hair tip elongation as a key regulator of polarized membrane trafficking. May promote the PtdIns(4,5)P2 synthesis and organization in root hair membrane. {ECO:0000250, ECO:0000269|PubM…	554
864215	865894	Mb_4556|QLI69402.1	No match	No match	No match	No match	No match
888638	889371	Mb_4556|QLI68918.1	No match	No match	No match	No match	No match
890623	891617	Mb_4556|QLI69742.1	No match	No match	No match	No match	No match
905816	906370	Mb_4556|QLI68663.1	No match	No match	No match	No match	No match
907577	910241	Mb_4556|QLI69697.1	P28584	Low-affinity potassium transport protein	Saccharomyces cerevisiae (strain ATCC 204508 / S288c) (Baker's yeast)	FUNCTION: This protein is required for low-affinity potassium transport.	889
970481	971416	Mb_4556|QLI68658.1	S3D9F1	Highly reducing polyketide synthase gloL (HR-PKS gloL) (EC 2.3.1.-) (Pneumocandin acyl side chain synthase) (Pneumocandin biosynthesis cluster protein L)	Glarea lozoyensis (strain ATCC 20868 / MF5171)	FUNCTION: Highly reducing polyketide synthase; part of the gene cluster that mediates the biosynthesis of pneumocandins, lipohexapeptides of the echinocandin family that prevent fungal cell wall formation by non-competitive inhibition of beta-1,3-glucan synthase (PubMed:23688303, PubMed:27705900). The 10,12-dimethylmyristoyl side chain is synthesized by the reducing polyketide synthase gloL/GLPKS…	2531
973269	974893	Mb_4556|QLI70059.1	B2RML6	Cytochrome P450 monooxygenase BOT4 (EC 1.-.-.-) (Botrydial biosynthesis cluster protein 4)	Botryotinia fuckeliana (Noble rot fungus) (Botrytis cinerea)	FUNCTION: Cytochrome P450 monooxygenase; part of the gene cluster that mediates the biosynthesis of botrydial (PubMed:14651630, PubMed:19476353, PubMed:27529428). Botrydial is necessary for colonization of plant tissue by the T4 strain (PubMed:19035644). It is a strain-dependent virulence factor since highly aggressive strains like SAS56 or B05 still retain substantial virulence when botrydial sy…	526
979928	980386	Mb_4556|QLI68754.1	Q9P5L0	Probable cytochrome b5	Neurospora crassa (strain ATCC 24698 / 74-OR23-1A / CBS 708.71 / DSM 1257 / FGSC 987)	FUNCTION: Membrane bound hemoprotein which function as an electron carrier for several membrane bound oxygenases. {ECO:0000250}.	139
980831	982358	Mb_4556|QLI69171.1	No match	No match	No match	No match	No match
1034267	1036638	Mb_4556|QLI69368.1	Q9P7F2	Copper amine oxidase 1 (EC 1.4.3.21)	Schizosaccharomyces pombe (strain 972 / ATCC 24843) (Fission yeast)	FUNCTION: Copper amine oxidase involved in the metabolism of xenobiotic and biogenic amines. Capable of catalyzing the oxidative deamination of primary amines such as ethylamine as alternate sources of nitrogen to support growth. {ECO:0000269|PubMed:18723604}.	712
1036878	1038935	Mb_4556|QLI70075.1	C8V3N0	Aspercryptin biosynthesis cluster-specific transcription regulator atnN (Aspercryptin biosynthesis cluster protein N)	Emericella nidulans (strain FGSC A4 / ATCC 38163 / CBS 112.46 / NRRL 194 / M139) (Aspergillus nidulans)	FUNCTION: Transcription factor that positively regulates the cluster that mediate the production of aspercryptins, linear lipopeptides built from six amino acids including 2 highly unusual and nonproteogenic amino acids, 2-amino-octanoic acid (2aoa) and 2-amino-dodecanol (2adol) (PubMed:27310134, PubMed:26563584). {ECO:0000269|PubMed:27310134, ECO:0000305|PubMed:26563584}.	610
1058268	1059608	Mb_4556|QLI69795.1	Q9SN58	UDP-glucose 4-epimerase 5 (AtUGE5) (EC 5.1.3.2) (UDP-galactose 4-epimerase 5)	Arabidopsis thaliana (Mouse-ear cress)	FUNCTION: Catalyzes the interconversion between UDP-glucose and UDP-galactose. {ECO:0000269|PubMed:16644739, ECO:0000269|PubMed:19754426}.	351
1060848	1061757	Mb_4556|QLI69093.1	No match	No match	No match	No match	No match
1062893	1063950	Mb_4556|QLI69850.1	No match	No match	No match	No match	No match
1065561	1074300	Mb_4556|QLI69343.1	No match	No match	No match	No match	No match
1095668	1097638	Mb_4556|QLI69369.1	No match	No match	No match	No match	No match
1098394	1099447	Mb_4556|QLI70076.1	No match	No match	No match	No match	No match
1099923	1101125	Mb_4556|QLI69315.1	No match	No match	No match	No match	No match
1105707	1106806	Mb_4556|QLI69690.1	No match	No match	No match	No match	No match
1114010	1114735	Mb_4556|QLI69060.1	No match	No match	No match	No match	No match
1115688	1116182	Mb_4556|QLI69753.1	No match	No match	No match	No match	No match
1118383	1118733	Mb_4556|QLI69005.1	No match	No match	No match	No match	No match
1149579	1151518	Mb_4556|QLI68824.1	Q3URE1	Malonate--CoA ligase ACSF3, mitochondrial (EC 6.2.1.76) (Acyl-CoA synthetase family member 3)	Mus musculus (Mouse)	FUNCTION: Catalyzes the initial reaction in intramitochondrial fatty acid synthesis, by activating malonate and methylmalonate, but not acetate, into their respective CoA thioester. May have some preference toward very-long-chain substrates. {ECO:0000250|UniProtKB:Q4G176}.	583
1155226	1156323	Mb_4556|QLI68668.1	P07046	3-dehydroshikimate dehydratase (DHS dehydratase) (DHSase) (EC 4.2.1.118) (Quinic acid degradation cluster protein 4)	Neurospora crassa (strain ATCC 24698 / 74-OR23-1A / CBS 708.71 / DSM 1257 / FGSC 987)	FUNCTION: 3-dehydroshikimate dehydratase; part of the qa gene cluster that mediates the catabolism of quinic acid (QA) and as such, allows the use of QA as a sole carbon source (PubMed:2525625, PubMed:6458044). Catalyzes the third reaction in the inducible quinic acid catabolic pathway by converting dehydroshikimate to protocatechuate (PubMed:149131). The qa cluster encodes 3 inducible enymes (qa…	359
1156457	1157086	Mb_4556|QLI69411.1	No match	No match	No match	No match	No match
1158603	1160608	Mb_4556|QLI68717.1	No match	No match	No match	No match	No match
1163257	1164216	Mb_4556|QLI68978.1	No match	No match	No match	No match	No match
1331693	1333081	Mb_4556|QLI69284.1	No match	No match	No match	No match	No match
1335709	1336808	Mb_4556|QLI69333.1	D7PHZ1	Oxidoreductase vrtI (EC 1.14.-.-) (Viridicatumtoxin synthesis protein I)	Penicillium aethiopicum	FUNCTION: Oxidoreductase; part of the gene cluster that mediates the biosynthesis of viridicatumtoxin, a tetracycline-like fungal meroterpenoid with a unique, fused spirobicyclic ring system (PubMed:20534346). The first step of the pathway is the production of the malonamoyl-CoA starter unit for the polyketide synthase vrtA (PubMed:20534346). The aldolase vrtJ may be involved in the synthesis of …	413
1347603	1349868	Mb_4556|QLI68924.1	D7PHZ3	Malonamoyl-CoA synthetase vrtB (EC 6.2.1.-) (Viridicatumtoxin synthesis protein B)	Penicillium aethiopicum	FUNCTION: Malonamoyl-CoA synthetase; part of the gene cluster that mediates the biosynthesis of viridicatumtoxin, a tetracycline-like fungal meroterpenoid with a unique, fused spirobicyclic ring system (PubMed:20534346). The first step of the pathway is the production of the malonamoyl-CoA starter unit for the polyketide synthase vrtA (PubMed:20534346). The aldolase vrtJ may be involved in the sy…	723
1353455	1354772	Mb_4556|QLI68873.1	D7PHZ9	FAD-dependent monooxygenase vrtH (EC 1.-.-.-) (Viridicatumtoxin synthesis protein H)	Penicillium aethiopicum	FUNCTION: FAD-dependent monooxygenase; part of the gene cluster that mediates the biosynthesis of viridicatumtoxin, a tetracycline-like fungal meroterpenoid with a unique, fused spirobicyclic ring system (PubMed:20534346). The first step of the pathway is the production of the malonamoyl-CoA starter unit for the polyketide synthase vrtA (PubMed:20534346). The aldolase vrtJ may be involved in the …	413
1910194	1911114	Mb_4556|QLI69441.1	No match	No match	No match	No match	No match
1912151	1912891	Mb_4556|QLI68699.1	No match	No match	No match	No match	No match
1916922	1919353	Mb_4556|QLI70003.1	P52959	Cutinase transcription factor 1 beta	Fusarium vanettenii (Neocosmospora pisi)		882
3054506	3056980	Mb_4556|QLI69468.1	No match	No match	No match	No match	No match
3057660	3059432	Mb_4556|QLI68723.1	No match	No match	No match	No match	No match
3082126	3084041	Mb_4556|QLI69318.1	No match	No match	No match	No match	No match
3084245	3085802	Mb_4556|QLI70034.1	No match	No match	No match	No match	No match
3314689	3315729	Mb_4556|QLI69069.1	No match	No match	No match	No match	No match
3316563	3318484	Mb_4556|QLI69826.1	G1XU03	Cytochrome P450 monooxygenase AOL_s00215g282 (EC 1.-.-.-) (Sesquiterpenyl epoxy-cyclohexenoids cluster protein AOL_s00215g282) (SECs cluster protein AOL_s00215g282) (m-cresol hydroxylase AOL_s00215g282)	Arthrobotrys oligospora (strain ATCC 24927 / CBS 115.81 / DSM 1491) (Nematode-trapping fungus) (Didymozoophaga oligospora)	FUNCTION: Cytochrome P450 monooxygenase; part of the gene cluster that mediates the biosynthesis of sesquiterpenyl epoxy-cyclohexenoids (SECs) such as anthrobotrisins and arthrosporols, metabolites that possess a novel hybrid carbon skeleton consisting of a polyketide-derived epoxycyclohexenol combined with a terpenoid-derived monocyclic sesquiterpenol substructure (PKS-PTS hybrid) (PubMed:277239…	537
3391337	3392969	Mb_4556|QLI69188.1	No match	No match	No match	No match	No match
3394694	3397084	Mb_4556|QLI69950.1	No match	No match	No match	No match	No match
3559706	3561122	Mb_4556|QLI69182.1	No match	No match	No match	No match	No match
3561182	3561904	Mb_4556|QLI69944.1	No match	No match	No match	No match	No match
3659594	3659980	Mb_4556|QLI69805.1	No match	No match	No match	No match	No match
3661863	3662726	Mb_4556|QLI69852.1	No match	No match	No match	No match	No match
3666230	3667843	Mb_4556|QLI69899.1	P39907	O-glucosyltransferase LpsA (EC 2.4.1.-)	Dichelobacter nodosus (Bacteroides nodosus)	FUNCTION: Involved in lipopolysaccharide core biosynthesis.	318
3680697	3682174	Mb_4556|QLI69044.1	No match	No match	No match	No match	No match
3683704	3684126	Mb_4556|QLI69650.1	No match	No match	No match	No match	No match
3703622	3704631	Mb_4556|QLI69564.1	No match	No match	No match	No match	No match
3707684	3708328	Mb_4556|QLI68862.1	No match	No match	No match	No match	No match
3711038	3713292	Mb_4556|QLI69303.1	Q8NKB6	Probable aspartic-type endopeptidase opsB (EC 3.4.23.-) (Oryzapsin B)	Aspergillus oryzae (strain ATCC 42149 / RIB 40) (Yellow koji mold)	FUNCTION: Probable GPI-anchored aspartic-type endopeptidase. {ECO:0000250}.	487
3715380	3716327	Mb_4556|QLI70062.1	Q9UT59	Putative uncharacterized oxidoreductase C513.07 (EC 1.1.1.-)	Schizosaccharomyces pombe (strain 972 / ATCC 24843) (Fission yeast)		336
3745613	3748374	Mb_4556|QLI69789.1	A1CLY8	Polyketide synthase-nonribosomal peptide synthetase (PKS-NRPS) (EC 2.3.1.-) (EC 6.3.2.-) (Cytochalasin biosynthesis protein A)	Aspergillus clavatus (strain ATCC 1007 / CBS 513.65 / DSM 816 / NCTC 3887 / NRRL 1 / QM 1276 / 107)	FUNCTION: Hybrid PKS-NRPS synthetase; part of the gene cluster that mediates the biosynthesis of the mycotoxins cytochalasins E and K (PubMed:21983160). The hybrid PKS-NRPS synthetase ccsA and the enoyl reductase ccsC are responsible for fusion of phenylalanine with an octaketide backbone and subsequent release of the stable tetramic acid precursor (PubMed:21983160, PubMed:27551732). The polyketi…	4043
3748399	3748928	Mb_4556|QLI69086.1	A0JJU1	Tenellin synthetase (TENS) (EC 2.3.1.-) (EC 6.3.2.-) (Hybrid PKS-NRPS synthetase tenS) (Tenellin-type 2-pyridones biosynthesis cluster protein S)	Beauveria bassiana (White muscardine disease fungus) (Tritirachium shiotae)	FUNCTION: Hybrid PKS-NRPS synthetase; part of the gene cluster that mediates the biosynthesis of tenellin-type 2-pyridones, iron-chelating compounds involved in iron stress tolerance, competition with the natural competitor fungus Metarhizium robertsii and insect hosts infection (PubMed:17216664, PubMed:18266306, PubMed:20575135, PubMed:34903054). TenS catalyzes the assembly of the polyketide-ami…	4239
3821656	3823977	Mb_4556|QLI69644.1	P29138	Cuticle-degrading protease (EC 3.4.21.-) (Chymoelastase) (PR1)	Metarhizium anisopliae (Entomophthora anisopliae)	FUNCTION: Capable of breaching the insect cuticle.	388
3826286	3826925	Mb_4556|QLI68943.1	No match	No match	No match	No match	No match
3990721	3991176	Mb_4556|QLI69962.1	No match	No match	No match	No match	No match
3992009	3992407	Mb_4556|QLI69153.1	No match	No match	No match	No match	No match
3995335	3996215	Mb_4556|QLI69912.1	D4ATA2	Uncharacterized secreted protein ARB_07466	Arthroderma benhamiae (strain ATCC MYA-4681 / CBS 112371) (Trichophyton mentagrophytes)		245
4011702	4013916	Mb_4556|QLI69755.1	No match	No match	No match	No match	No match
4016449	4018173	Mb_4556|QLI69151.1	Q4WR24	3-ketosteroid 1-dehydrogenase helE (EC 1.3.-.-) (Helvolic acid biosynthesis cluster protein E)	Aspergillus fumigatus (strain ATCC MYA-4609 / CBS 101355 / FGSC A1100 / Af293) (Neosartorya fumigata)	FUNCTION: 3-ketosteroid 1-dehydrogenase; part of the gene cluster that mediates the biosynthesis of helvolic acid, an antibacterial nortriterpenoid (PubMed:19415934, PubMed:19216560, PubMed:29158519). Protostadienol synthase helA cyclizes (3S)-oxidosqualene to (17Z)-protosta-17(20),24-dien-3-beta-ol (protostadienol)(PubMed:19415934, PubMed:19216560, PubMed:29158519). The synthesis of protostadien…	596
4039229	4039822	Mb_4556|QLI69248.1	Q9Y7X4	Uncharacterized membrane protein C365.16	Schizosaccharomyces pombe (strain 972 / ATCC 24843) (Fission yeast)		277
4041703	4042723	Mb_4556|QLI69959.1	Q08235	Ribosome biogenesis protein BRX1	Saccharomyces cerevisiae (strain ATCC 204508 / S288c) (Baker's yeast)	FUNCTION: Required for biogenesis of the 60S ribosomal subunit. {ECO:0000269|PubMed:11843177}.	291
4053566	4054000	Mb_4556|QLI68768.1	No match	No match	No match	No match	No match
4058696	4061440	Mb_4556|QLI68819.1	Q8R9K5	Tryptophanase (EC 4.1.99.1) (L-tryptophan indole-lyase) (TNase)	Caldanaerobacter subterraneus subsp. tengcongensis (strain DSM 15242 / JCM 11007 / NBRC 100824 / MB4) (Thermoanaerobacter tengcongensis)		462
4087176	4088732	Mb_4556|QLI69754.1	No match	No match	No match	No match	No match
4090623	4091978	Mb_4556|QLI69006.1	No match	No match	No match	No match	No match
4190467	4191963	Mb_4556|QLI69287.1	No match	No match	No match	No match	No match
4196868	4197932	Mb_4556|QLI69796.1	Q4WB00	Methyltransferase psoC (EC 2.1.1.-) (Pseurotin biosynthesis protein C)	Aspergillus fumigatus (strain ATCC MYA-4609 / CBS 101355 / FGSC A1100 / Af293) (Neosartorya fumigata)	FUNCTION: Methyltransferase; part of the gene cluster that mediates the biosynthesis of pseurotin A, a competitive inhibitor of chitin synthase and an inducer of nerve-cell proliferation (PubMed:24082142, PubMed:24939566). The PKS-NRPS hybrid synthetase psoA is responsible for the biosynthesis of azaspirene, one of the first intermediates having the 1-oxa-7-azaspiro[4,4]-non-2-ene-4,6-dione core …	271
4359889	4361783	Mb_4556|QLI69988.1	No match	No match	No match	No match	No match
4362893	4364065	Mb_4556|QLI69278.1	No match	No match	No match	No match	No match
4364631	4365956	Mb_4556|QLI70040.1	No match	No match	No match	No match	No match
4368393	4370123	Mb_4556|QLI68927.1	No match	No match	No match	No match	No match
4373629	4375968	Mb_4556|QLI68796.1	Q9P7F2	Copper amine oxidase 1 (EC 1.4.3.21)	Schizosaccharomyces pombe (strain 972 / ATCC 24843) (Fission yeast)	FUNCTION: Copper amine oxidase involved in the metabolism of xenobiotic and biogenic amines. Capable of catalyzing the oxidative deamination of primary amines such as ethylamine as alternate sources of nitrogen to support growth. {ECO:0000269|PubMed:18723604}.	712
4438471	4445988	Mb_4556|QLI69508.1	P42772	Cyclin-dependent kinase 4 inhibitor B (Multiple tumor suppressor 2) (MTS-2) (p14-INK4b) (p15-INK4b) (p15INK4B)	Homo sapiens (Human)	FUNCTION: Interacts strongly with CDK4 and CDK6. Potent inhibitor. Potential effector of TGF-beta induced cell cycle arrest.	138
4447931	4448818	Mb_4556|QLI68812.1	No match	No match	No match	No match	No match
4642191	4643783	Mb_4556|QLI69255.1	P0CT44	3-hydroxy-3-methylglutaryl-coenzyme A reductase (HMG-CoA reductasee) (EC 1.1.1.34)	Gibberella fujikuroi (Bakanae and foot rot disease fungus) (Fusarium fujikuroi)	FUNCTION: HMG-CoA reductase; part of the first module of ergosterol biosynthesis pathway that includes the early steps of the pathway, conserved across all eukaryotes, and which results in the formation of mevalonate from acetyl-coenzyme A (acetyl-CoA) (By similarity). In this module, the cytosolic acetyl-CoA acetyltransferase catalyzes the formation of acetoacetyl-CoA (By similarity). The hydrox…	976
4644798	4645298	Mb_4556|QLI70017.1	No match	No match	No match	No match	No match
4648571	4649136	Mb_4556|QLI69386.1	No match	No match	No match	No match	No match
4654035	4655260	Mb_4556|QLI69435.1	P0CT93	O-methylsterigmatocystin oxidoreductase (OMST oxidoreductase) (EC 1.14.14.117) (Aflatoxin B synthase) (Aflatoxin biosynthesis protein Q) (Cytochrome P450 64)	Aspergillus flavus	FUNCTION: Converts O-methylsterigmatocystin (OMST) to aflatoxin B1 and converts dihydro-O-methylsterigmatocystin (DHOMST) to aflatoxin B2 in the aflatoxin biosynthesis pathway. {ECO:0000250}.	528
4715646	4716797	Mb_4556|QLI70063.1	No match	No match	No match	No match	No match
4717780	4718304	Mb_4556|QLI68760.1	No match	No match	No match	No match	No match
4718326	4719910	Mb_4556|QLI69148.1	Q59RQ0	ATP-dependent DNA helicase PIF1 (EC 3.6.4.12) (DNA repair and recombination helicase PIF1)	Candida albicans (strain SC5314 / ATCC MYA-2876) (Yeast)	FUNCTION: DNA-dependent ATPase and 5'-3' DNA helicase required for the maintenance of both mitochondrial and nuclear genome stability. Efficiently unwinds G-quadruplex (G4) DNA structures and forked RNA-DNA hybrids. Resolves G4 structures, preventing replication pausing and double-strand breaks (DSBs) at G4 motifs. Involved in the maintenance of telomeric DNA. Inhibits telomere elongation, de nov…	906
4746419	4747288	Mb_4556|QLI69444.1	No match	No match	No match	No match	No match
4751808	4752161	Mb_4556|QLI70080.1	No match	No match	No match	No match	No match
Chromosome_CP058936.1
159552	160256	Mb_4556|QLI71909.1	No match	No match	No match	No match	No match
160320	161690	Mb_4556|QLI72509.1	P16588	Alkaline serine exoprotease A (EC 3.4.21.-)	Vibrio alginolyticus		534
171019	172200	Mb_4556|QLI72560.1	A7UMW1	Non-reducing polyketide synthase 1 (EC 2.3.1.-) (Elsinochromes biosynthesis cluster protein PKS1)	Elsinoe fawcettii (Citrus scab fungus) (Sphaceloma fawcettii)	FUNCTION: Non-reducing polyketide synthase; part of the gene cluster that mediates the biosynthesis of elsinochromes, pigments consisting of at least four interconvertible tautomers (A, B, C and D) that have a core phenolic quinone to which various side chains are attached and which play an important role in fungal pathogenesis (PubMed:18957608, PubMed:18321192). The non-reducing polyketide synth…	2192
172703	173988	Mb_4556|QLI71647.1	Q6Q877	C6 finger domain transcription factor sirZ (Sirodesmin production protein Z)	Leptosphaeria maculans (Blackleg fungus) (Phoma lingam)	FUNCTION: Transcription factor that regulates sirodesmin production and contributes to virulence (PubMed:15387811, PubMed:18023597). Probably binds to the consensus motif TCGGN(3)CCGA found in the promoters of sirT, sirP, sirO, sirN, sirP, sirB, sirR, sirJ and sirQ (PubMed:18023597). {ECO:0000269|PubMed:15387811, ECO:0000269|PubMed:18023597}.	500
198134	198468	Mb_4556|QLI72105.1	No match	No match	No match	No match	No match
201117	202741	Mb_4556|QLI72055.1	Q7TNE1	Succinate--hydroxymethylglutarate CoA-transferase (EC 2.8.3.13) (SuccinylCoA:glutarate-CoA transferase)	Mus musculus (Mouse)	FUNCTION: Catalyzes the succinyl-CoA-dependent conversion of glutarate to glutaryl-CoA. Can use different dicarboxylic acids as CoA acceptors, the preferred ones are glutarate, succinate, adipate, and 3-hydroxymethylglutarate (By similarity). {ECO:0000250}.	436
237767	238198	Mb_4556|QLI71585.1	No match	No match	No match	No match	No match
239417	239980	Mb_4556|QLI72119.1	No match	No match	No match	No match	No match
262451	263764	Mb_4556|QLI72720.1	W7MX26	Secreted aspartic protease FUS4 (EC 3.4.23.-) (Fusarin biosynthesis protein 4)	Gibberella moniliformis (strain M3125 / FGSC 7600) (Maize ear and stalk rot fungus) (Fusarium verticillioides)	FUNCTION: Secreted aspartic protease; part of the gene cluster that mediates the biosynthesis of the mycotoxin fusarin C (PubMed:22652150). Within the cluster, FUS1, FUS2, FUS8 and FUS9 are sufficient for fusarin production (By similarity). The other FUS cluster members are not essential for fusarin C biosynthesis (By similarity). {ECO:0000250|UniProtKB:S0ELJ9, ECO:0000269|PubMed:22652150}.	439
264339	264947	Mb_4556|QLI71923.1	W7MMJ0	Glutathione S-transferase-like protein FUS3 (EC 2.5.1.-) (Fusarin biosynthesis protein 3)	Gibberella moniliformis (strain M3125 / FGSC 7600) (Maize ear and stalk rot fungus) (Fusarium verticillioides)	FUNCTION: Glutathione S-transferase-like protein; part of the gene cluster that mediates the biosynthesis of the mycotoxin fusarin C (PubMed:22652150). Within the cluster, FUS1, FUS2, FUS8 and FUS9 are sufficient for fusarin production (By similarity). The other FUS cluster members are not essential for fusarin C biosynthesis (By similarity). {ECO:0000250|UniProtKB:S0EHD0, ECO:0000269|PubMed:2265…	220
383908	384357	Mb_4556|QLI72095.1	No match	No match	No match	No match	No match
385846	386361	Mb_4556|QLI72369.1	No match	No match	No match	No match	No match
450591	451857	Mb_4556|QLI72739.1	Q9Z9P2	Glycerate kinase (EC 2.7.1.31)	Halalkalibacterium halodurans (strain ATCC BAA-125 / DSM 18197 / FERM 7344 / JCM 9153 / C-125) (Bacillus halodurans)		380
453566	455286	Mb_4556|QLI71682.1	D7PHY8	Efflux pump vrtL (Viridicatumtoxin synthesis protein L)	Penicillium aethiopicum	FUNCTION: Efflux pump; part of the gene cluster that mediates the biosynthesis of viridicatumtoxin, a tetracycline-like fungal meroterpenoid with a unique, fused spirobicyclic ring system (PubMed:20534346). {ECO:0000269|PubMed:20534346}.	503
459264	460448	Mb_4556|QLI72368.1	No match	No match	No match	No match	No match
531035	532194	Mb_4556|QLI72477.1	No match	No match	No match	No match	No match
536027	536760	Mb_4556|QLI71788.1	No match	No match	No match	No match	No match
597349	598388	Mb_4556|QLI71719.1	O14311	SAGA complex subunit spt3	Schizosaccharomyces pombe (strain 972 / ATCC 24843) (Fission yeast)	FUNCTION: Functions as a component of the transcription regulatory histone acetylation (HAT) complex SAGA. SAGA is involved in RNA polymerase II-dependent transcriptional regulation. At the promoters, SAGA is required for recruitment of the basal transcription machinery. It influences RNA polymerase II transcriptional activity through different activities such as TBP interaction (spt3, spt8 and s…	307
599291	601081	Mb_4556|QLI72448.1	No match	No match	No match	No match	No match
681808	683757	Mb_4556|QLI72479.1	No match	No match	No match	No match	No match
685085	685816	Mb_4556|QLI71844.1	No match	No match	No match	No match	No match
745401	745889	Mb_4556|QLI71610.1	No match	No match	No match	No match	No match
746695	755649	Mb_4556|QLI71730.1	P18160	Dual specificity protein kinase splA (EC 2.7.10.2) (Non-receptor tyrosine kinase spore lysis A) (Tyrosine-protein kinase 1)	Dictyostelium discoideum (Social amoeba)	FUNCTION: Essential for spore differentiation.	2410
756865	757410	Mb_4556|QLI72594.1	No match	No match	No match	No match	No match
770506	772719	Mb_4556|QLI72717.1	P17405	Sphingomyelin phosphodiesterase (EC 3.1.4.12) (EC 3.1.4.3) (Acid sphingomyelinase) (aSMase) [Cleaved into: Sphingomyelin phosphodiesterase, processed form]	Homo sapiens (Human)	FUNCTION: Converts sphingomyelin to ceramide (PubMed:1840600, PubMed:18815062, PubMed:27659707, PubMed:25920558, PubMed:25339683, PubMed:33163980, PubMed:12563314). Exists as two enzymatic forms that arise from alternative trafficking of a single protein precursor, one that is targeted to the endolysosomal compartment, whereas the other is released extracellularly (PubMed:21098024, PubMed:9660788…	631
774750	775040	Mb_4556|QLI72035.1	No match	No match	No match	No match	No match
808279	808719	Mb_4556|QLI72220.1	No match	No match	No match	No match	No match
812857	813471	Mb_4556|QLI72521.1	Q67XW5	Ubiquitin carboxyl-terminal hydrolase 18 (EC 3.4.19.12) (Deubiquitinating enzyme 18) (AtUBP18) (Ubiquitin thioesterase 18) (Ubiquitin-specific-processing protease 18)	Arabidopsis thaliana (Mouse-ear cress)	FUNCTION: Recognizes and hydrolyzes the peptide bond at the C-terminal Gly of ubiquitin. Involved in the processing of poly-ubiquitin precursors as well as that of ubiquitinated proteins (By similarity). {ECO:0000250}.	631
819111	819659	Mb_4556|QLI71833.1	No match	No match	No match	No match	No match
822535	824662	Mb_4556|QLI71879.1	D4B1N9	Probable secreted lipase ARB_02369 (EC 3.1.1.3)	Arthroderma benhamiae (strain ATCC MYA-4681 / CBS 112371) (Trichophyton mentagrophytes)		564
931470	932303	Mb_4556|QLI71809.1	No match	No match	No match	No match	No match
936905	938107	Mb_4556|QLI71859.1	No match	No match	No match	No match	No match
1007658	1008044	Mb_4556|QLI72126.1	No match	No match	No match	No match	No match
1008867	1011121	Mb_4556|QLI72725.1	P32791	Ferric/cupric reductase transmembrane component 1 (EC 1.16.1.9) (Ferric-chelate reductase 1)	Saccharomyces cerevisiae (strain ATCC 204508 / S288c) (Baker's yeast)	FUNCTION: Metalloreductase responsible for reducing extracellular iron and copper prior to import. Catalyzes the reductive uptake of Fe(3+)-salts and Fe(3+) bound to catecholate or hydroxamate siderophores. Fe(3+) is reduced to Fe(2+), which then dissociates from the siderophore and can be imported by the high-affinity Fe(2+) transport complex in the plasma membrane. Also participates in Cu(2+) r…	686
1013532	1014046	Mb_4556|QLI72172.1	No match	No match	No match	No match	No match
1176389	1177743	Mb_4556|QLI71940.1	No match	No match	No match	No match	No match
1178934	1179284	Mb_4556|QLI71903.1	No match	No match	No match	No match	No match
1214285	1216021	Mb_4556|QLI72181.1	Q2UMX6	Probable feruloyl esterase B-2 (EC 3.1.1.73) (Ferulic acid esterase B-2) (FAEB-2)	Aspergillus oryzae (strain ATCC 42149 / RIB 40) (Yellow koji mold)	FUNCTION: Involved in degradation of plant cell walls. Hydrolyzes the feruloyl-arabinose ester bond in arabinoxylans as well as the feruloyl-galactose and feruloyl-arabinose ester bonds in pectin. {ECO:0000250|UniProtKB:Q8WZI8}.	526
1219423	1220607	Mb_4556|QLI71901.1	B8N106	Alkaline protease 1 (ALP) (EC 3.4.21.63) (Aspergillopeptidase B) (Aspergillus proteinase B) (Elastase) (Elastinolytic serine proteinase) (Oryzin) (allergen Asp fl 1)	Aspergillus flavus (strain ATCC 200026 / FGSC A1120 / IAM 13836 / NRRL 3357 / JCM 12722 / SRRC 167)	FUNCTION: Secreted alkaline protease that allows assimilation of proteinaceous substrates. {ECO:0000250}.	403
1317361	1318613	Mb_4556|QLI71779.1	No match	No match	No match	No match	No match
1319904	1320851	Mb_4556|QLI72273.1	No match	No match	No match	No match	No match
1466514	1467221	Mb_4556|QLI71536.1	No match	No match	No match	No match	No match
1471094	1471423	Mb_4556|QLI71705.1	No match	No match	No match	No match	No match
1471802	1472993	Mb_4556|QLI71579.1	No match	No match	No match	No match	No match
1481038	1482402	Mb_4556|QLI72339.1	Q73XV3	Salicylate synthase (Chorismate mutase) (CM) (EC 5.4.99.5) (Isochorismate synthase/isochorismate lyase) (EC 4.2.99.21, EC 5.4.4.2) (Mycobactin synthase protein)	Mycolicibacterium paratuberculosis (strain ATCC BAA-968 / K-10) (Mycobacterium paratuberculosis)	FUNCTION: Involved in the incorporation of salicylate into the virulence-conferring salicylate-based siderophore mycobactin. Catalyzes the initial conversion of chorismate to yield the intermediate isochorismate (isochorismate synthase activity), and the subsequent elimination of the enolpyruvyl side chain in a lyase reaction to give salicylate (isochorismate pyruvate-lyase activity). In the abse…	450
1484444	1485130	Mb_4556|QLI72662.1	D4AL88	Probable extracellular metalloproteinase 3 (EC 3.4.24.-) (Fungalysin MEP3)	Arthroderma benhamiae (strain ATCC MYA-4681 / CBS 112371) (Trichophyton mentagrophytes)	FUNCTION: Secreted metalloproteinase probably acting as a virulence factor. {ECO:0000250}.	633
1486070	1486458	Mb_4556|QLI71975.1	No match	No match	No match	No match	No match
1649631	1650216	Mb_4556|QLI71733.1	No match	No match	No match	No match	No match
1655067	1656461	Mb_4556|QLI72129.1	No match	No match	No match	No match	No match
1695856	1696863	Mb_4556|QLI72264.1	No match	No match	No match	No match	No match
1698484	1701773	Mb_4556|QLI72218.1	No match	No match	No match	No match	No match
1794964	1795473	Mb_4556|QLI72741.1	No match	No match	No match	No match	No match
1797063	1798101	Mb_4556|QLI72104.1	No match	No match	No match	No match	No match
1802277	1803395	Mb_4556|QLI72300.1	No match	No match	No match	No match	No match
3209197	3210846	Mb_4556|QLI72038.1	A0A089FNE5	MFS transporter prlL (Pyrrolocin biosynthesis protein L)	Fungal sp. (strain NRRL 50135)	FUNCTION: Efflux pump that might be required for efficient secretion of pyrrolocin or other secondary metabolies produced by the pyrrolocin gene cluster (PubMed:25226362). {ECO:0000305|PubMed:25226362}.	495
3213894	3214465	Mb_4556|QLI72455.1	No match	No match	No match	No match	No match
3218139	3218893	Mb_4556|QLI72127.1	Q9ZW22	Methylsterol monooxygenase 2-1 (EC 1.14.18.11) (EC 1.14.18.9) (Sterol 4-alpha-methyl-oxidase 2) (AtSMO2) (Sterol 4-alpha-methyl-oxidase 2-1)	Arabidopsis thaliana (Mouse-ear cress)	FUNCTION: Non-heme iron oxygenase involved in sterols biosynthesis by catalyzing the removal of the second methyl group at the C-4 position (PubMed:11707264). 24-ethylidenelophenol and 24-ethyllophenol are the preferred substrates (PubMed:11707264). Together with SMO2-2, required during embryogenesis, probably by maintaining sterols and auxin homeostasis (PubMed:27006488). {ECO:0000269|PubMed:117…	272
3220820	3222051	Mb_4556|QLI72726.1	No match	No match	No match	No match	No match
3636930	3639398	Mb_4556|QLI71546.1	No match	No match	No match	No match	No match
3642650	3643494	Mb_4556|QLI71503.1	No match	No match	No match	No match	No match
4092219	4092971	Mb_4556|QLI72501.1	No match	No match	No match	No match	No match
4097242	4098057	Mb_4556|QLI71812.1	Q2UHA7	NADPH--cytochrome P450 reductase (CPR) (P450R) (EC 1.6.2.4)	Aspergillus oryzae (strain ATCC 42149 / RIB 40) (Yellow koji mold)	FUNCTION: This enzyme is required for electron transfer from NADP to cytochrome P450 in microsomes. It can also provide electron transfer to heme oxygenase and cytochrome B5. Involved in ergosterol biosynthesis. {ECO:0000255|HAMAP-Rule:MF_03212}.	695
4098136	4098783	Mb_4556|QLI72456.1	Q00141	NADPH--cytochrome P450 reductase (CPR) (P450R) (EC 1.6.2.4)	Aspergillus niger	FUNCTION: This enzyme is required for electron transfer from NADP to cytochrome P450 in microsomes. It can also provide electron transfer to heme oxygenase and cytochrome B5. Involved in ergosterol biosynthesis. {ECO:0000255|HAMAP-Rule:MF_03212}.	694
4136920	4138879	Mb_4556|QLI72286.1	No match	No match	No match	No match	No match
4140116	4141787	Mb_4556|QLI71645.1	D4AU27	Swainsonine transporter swnT (Swainsonine biosynthesis gene cluster protein T)	Arthroderma benhamiae (strain ATCC MYA-4681 / CBS 112371) (Trichophyton mentagrophytes)	FUNCTION: Transmembrane transporter; part of the gene cluster that mediates the biosynthesis of swainsonine, a cytotoxic fungal alkaloid and a potential cancer therapy drug (PubMed:28381497). Does not mediate the secretion of SW and the exact role of swnT in SW biosynthesis remains to be determined (By similarity). {ECO:0000250|UniProtKB:E9F8M0, ECO:0000269|PubMed:28381497}.	498
4142343	4144368	Mb_4556|QLI72237.1	S0EFU6	Beauvericin cluster-specific repressor BEA4 (Beauvericin biosynthesis cluster protein 4)	Gibberella fujikuroi (strain CBS 195.34 / IMI 58289 / NRRL A-6831) (Bakanae and foot rot disease fungus) (Fusarium fujikuroi)	FUNCTION: Transcription factor that specifically represses the expression of the gene cluster involved in the biosynthesis of beauvericin (BEA), a non-ribosomal cyclic hexadepsipeptide that shows antibiotic, antifungal, insecticidal, and cancer cell antiproliferative and antihaptotactic activity (PubMed:27750383). {ECO:0000269|PubMed:27750383}.	633
4232477	4233310	Mb_4556|QLI72412.1	No match	No match	No match	No match	No match
4235001	4235774	Mb_4556|QLI71820.1	No match	No match	No match	No match	No match
4242205	4243903	Mb_4556|QLI71905.1	A1CLZ3	Cytochrome P450 monooxygenase ccsG (EC 1.-.-.-) (Cytochalasin biosynthesis protein G)	Aspergillus clavatus (strain ATCC 1007 / CBS 513.65 / DSM 816 / NCTC 3887 / NRRL 1 / QM 1276 / 107)	FUNCTION: Cytochrome P450 monooxygenase; part of the gene cluster that mediates the biosynthesis of a family of the mycotoxins cytochalasins E and K (PubMed:21983160). The hybrid PKS-NRPS synthetase ccsA and the enoyl reductase ccsC are responsible for fusion of phenylalanine with an octaketide backbone and subsequent release of the stable tetramic acid precursor (PubMed:21983160, PubMed:27551732…	501
4244213	4245562	Mb_4556|QLI72403.1	No match	No match	No match	No match	No match
4245980	4246236	Mb_4556|QLI72558.1	No match	No match	No match	No match	No match
4247386	4247875	Mb_4556|QLI72000.1	No match	No match	No match	No match	No match
4250318	4252781	Mb_4556|QLI71793.1	K0E2F6	Putative transcription factor ecdB	Aspergillus rugulosus (Emericella rugulosa)		545
4254559	4254942	Mb_4556|QLI72680.1	No match	No match	No match	No match	No match
4256536	4258336	Mb_4556|QLI72074.1	A1CLY9	Cytochrome P450 monooxygenase ccsD (EC 1.-.-.-) (Cytochalasin biosynthesis protein D)	Aspergillus clavatus (strain ATCC 1007 / CBS 513.65 / DSM 816 / NCTC 3887 / NRRL 1 / QM 1276 / 107)	FUNCTION: Cytochrome P450 monooxygenase; part of the gene cluster that mediates the biosynthesis of a family of the mycotoxins cytochalasins E and K (PubMed:21983160). The hybrid PKS-NRPS synthetase ccsA and the enoyl reductase ccsC are responsible for fusion of phenylalanine with an octaketide backbone and subsequent release of the stable tetramic acid precursor (PubMed:21983160, PubMed:27551732…	494
4272405	4273626	Mb_4556|QLI72122.1	O74959	Uncharacterized oxidoreductase C736.13 (EC 1.-.-.-)	Schizosaccharomyces pombe (strain 972 / ATCC 24843) (Fission yeast)		339
4274476	4275927	Mb_4556|QLI71512.1	A1CLY6	Cytochalasin cluster regulator ccsR (Cytochalasin biosynthesis protein R)	Aspergillus clavatus (strain ATCC 1007 / CBS 513.65 / DSM 816 / NCTC 3887 / NRRL 1 / QM 1276 / 107)	FUNCTION: Transcription factor involved in regulation of gene cluster that mediates the biosynthesis of the mycotoxins cytochalasins E and K (PubMed:21983160). {ECO:0000269|PubMed:21983160}.	534
Chromosome_CP058937.1
29723	36873	Mb_4556|QLI72968.1	D2E9X0	Reducing polyketide synthase DEP5 (EC 2.3.1.-) (Depudecin biosynthesis cluster protein 1)	Alternaria brassicicola (Dark leaf spot agent)	FUNCTION: Reducing polyketide synthase; part of the gene cluster that mediates the biosynthesis of depudecin, a highly oxidized eleven-carbon linear polyketide that acts as a histone deacetylase (HDAC) inhibitor and makes a small contribution to pathogenesis (PubMed:19737099). The reducing polyketide synthase DEP5 is the central enzyme in depudecin biosynthesis by yielding the backbone polyketide…	2376
37230	37583	Mb_4556|QLI73379.1	I1S166	Fusarielin synthase FSL1 (EC 2.3.1.-) (Fusarielin biosynthesis cluster protein 1) (Reducing polyketide synthase FSL1)	Gibberella zeae (strain ATCC MYA-4620 / CBS 123657 / FGSC 9075 / NRRL 31084 / PH-1) (Wheat head blight fungus) (Fusarium graminearum)	FUNCTION: Reducing polyketide synthase; part of the gene cluster that mediates the biosynthesis of fusarielins F, G and H, decaketide compounds with 5 methylations and a decaline core that act as mycoestrogens as they stimulate growth of MCF-7 breast cancer cells (PubMed:22252016, PubMed:27983606). The initial compound in the pathway is produced by the reducing polyketide synthase FSL1. FSL1 lack…	2642
49283	50689	Mb_4556|QLI73652.1	No match	No match	No match	No match	No match
52729	53460	Mb_4556|QLI73992.1	No match	No match	No match	No match	No match
65897	66623	Mb_4556|QLI73109.1	No match	No match	No match	No match	No match
68500	72159	Mb_4556|QLI73032.1	A3AWA4	Copper-transporting ATPase HMA5 (EC 7.2.2.8) (Protein HEAVY METAL ATPASE 5) (OsHMA5)	Oryza sativa subsp. japonica (Rice)	FUNCTION: Copper (Cu) transporter that plays an essential role in promoting translocation of Cu from roots to shoots. Involved in loading Cu to the xylem of the roots and other organs, including panicles. {ECO:0000269|PubMed:24064929}.	1002
75369	76161	Mb_4556|QLI73366.1	A0JJU1	Tenellin synthetase (TENS) (EC 2.3.1.-) (EC 6.3.2.-) (Hybrid PKS-NRPS synthetase tenS) (Tenellin-type 2-pyridones biosynthesis cluster protein S)	Beauveria bassiana (White muscardine disease fungus) (Tritirachium shiotae)	FUNCTION: Hybrid PKS-NRPS synthetase; part of the gene cluster that mediates the biosynthesis of tenellin-type 2-pyridones, iron-chelating compounds involved in iron stress tolerance, competition with the natural competitor fungus Metarhizium robertsii and insect hosts infection (PubMed:17216664, PubMed:18266306, PubMed:20575135, PubMed:34903054). TenS catalyzes the assembly of the polyketide-ami…	4239
77111	78482	Mb_4556|QLI73574.1	No match	No match	No match	No match	No match
79613	80713	Mb_4556|QLI73625.1	P11838	Endothiapepsin (EC 3.4.23.22) (Aspartate protease)	Cryphonectria parasitica (Chestnut blight fungus) (Endothia parasitica)		419
95901	97782	Mb_4556|QLI73315.1	D7UQ44	Prosolanapyrone synthase (PSS) (EC 3.2.1.-) (Highly reducing polyketide synthase sol1) (HR-PKS sol1) (Solanapyrone biosynthesis protein 1)	Alternaria solani	FUNCTION: Prosolanapyrone synthase; part of the gene cluster that mediates the biosynthesis of the phytotoxin solanapyrone, a causal agent of early blight disease of potato and tomato (PubMed:20486243). The prosolanapyrone synthase sol1 is a polyketide synthase that produces the octaketide desmethylprosolanapyrone I via sequential condensations of 7 malonyl-CoA units with one acetyl-CoA unit, and…	2641
97948	99297	Mb_4556|QLI72795.1	S3D9F1	Highly reducing polyketide synthase gloL (HR-PKS gloL) (EC 2.3.1.-) (Pneumocandin acyl side chain synthase) (Pneumocandin biosynthesis cluster protein L)	Glarea lozoyensis (strain ATCC 20868 / MF5171)	FUNCTION: Highly reducing polyketide synthase; part of the gene cluster that mediates the biosynthesis of pneumocandins, lipohexapeptides of the echinocandin family that prevent fungal cell wall formation by non-competitive inhibition of beta-1,3-glucan synthase (PubMed:23688303, PubMed:27705900). The 10,12-dimethylmyristoyl side chain is synthesized by the reducing polyketide synthase gloL/GLPKS…	2531
99518	100084	Mb_4556|QLI73434.1	D2E9X0	Reducing polyketide synthase DEP5 (EC 2.3.1.-) (Depudecin biosynthesis cluster protein 1)	Alternaria brassicicola (Dark leaf spot agent)	FUNCTION: Reducing polyketide synthase; part of the gene cluster that mediates the biosynthesis of depudecin, a highly oxidized eleven-carbon linear polyketide that acts as a histone deacetylase (HDAC) inhibitor and makes a small contribution to pathogenesis (PubMed:19737099). The reducing polyketide synthase DEP5 is the central enzyme in depudecin biosynthesis by yielding the backbone polyketide…	2376
105638	106958	Mb_4556|QLI73967.1	No match	No match	No match	No match	No match
106986	107851	Mb_4556|QLI73351.1	No match	No match	No match	No match	No match
112354	113766	Mb_4556|QLI73390.1	No match	No match	No match	No match	No match
132317	133428	Mb_4556|QLI72755.1	S0EET5	Polyketide synthase 19 (PKS19) (EC 2.3.1.-) (Fujikurins biosynthesis cluster protein PKS19)	Gibberella fujikuroi (strain CBS 195.34 / IMI 58289 / NRRL A-6831) (Bakanae and foot rot disease fungus) (Fusarium fujikuroi)	FUNCTION: Highly reducing polyketide synthase; part of the gene cluster that mediates the biosynthesis of fujikurins A-D, secondary metabolites playing a role during rice infection (PubMed:23825955, PubMed:26192387). The polyketide synthase PKS19 acts with the trans-enoyl reductase FFUJ_12240 and the polyketide transferase FFUJ_12241 to produce fujikurins, however, the biosynthesis pathway has no…	2492
135811	137181	Mb_4556|QLI73869.1	No match	No match	No match	No match	No match
146448	147005	Mb_4556|QLI72910.1	No match	No match	No match	No match	No match
149936	151408	Mb_4556|QLI72851.1	No match	No match	No match	No match	No match
180717	181327	Mb_4556|QLI73161.1	No match	No match	No match	No match	No match
182291	183538	Mb_4556|QLI73837.1	No match	No match	No match	No match	No match
184840	185370	Mb_4556|QLI72902.1	No match	No match	No match	No match	No match
207058	207597	Mb_4556|QLI73123.1	No match	No match	No match	No match	No match
210117	215179	Mb_4556|QLI73898.1	S0E028	Bikaverin cluster transcription factor bik5 (Bikaverin biosynthesis protein 5)	Gibberella fujikuroi (strain CBS 195.34 / IMI 58289 / NRRL A-6831) (Bakanae and foot rot disease fungus) (Fusarium fujikuroi)	FUNCTION: Transcription factor that regulates the expression of the gene cluster that mediates the biosynthesis of bikaverin, a red pigment also considered as a mycotoxin (PubMed:19400779). {ECO:0000269|PubMed:19400779}.	743
249829	250671	Mb_4556|QLI73421.1	No match	No match	No match	No match	No match
253134	254922	Mb_4556|QLI73997.1	Q54QI4	Homogentisate 1,2-dioxygenase (EC 1.13.11.5) (Homogentisate oxygenase) (Homogentisic acid oxidase) (Homogentisicase)	Dictyostelium discoideum (Social amoeba)		432
255441	257482	Mb_4556|QLI73377.1	Q00730	FAD-binding monooxygenase stcW (EC 1.14.13.-) (Sterigmatocystin biosynthesis cluster protein W)	Emericella nidulans (strain FGSC A4 / ATCC 38163 / CBS 112.46 / NRRL 194 / M139) (Aspergillus nidulans)	FUNCTION: FAD-binding monooxygenase; part of the gene cluster that mediates the biosynthesis of sterigmatocystin (ST), a polyketide-derived furanocoumarin which is part of the most toxic and carcinogenic compounds among the known mycotoxins (PubMed:8643646, PubMed:10618248). The first step in the biosynthesis of sterigmatocystin is the production of hexanoate by the fatty acid synthase (FAS) unit…	601
257889	260342	Mb_4556|QLI73952.1	No match	No match	No match	No match	No match
264075	264518	Mb_4556|QLI73041.1	No match	No match	No match	No match	No match
291425	292868	Mb_4556|QLI73018.1	No match	No match	No match	No match	No match
295062	303929	Mb_4556|QLI72953.1	No match	No match	No match	No match	No match
305209	306483	Mb_4556|QLI72812.1	Q9SN58	UDP-glucose 4-epimerase 5 (AtUGE5) (EC 5.1.3.2) (UDP-galactose 4-epimerase 5)	Arabidopsis thaliana (Mouse-ear cress)	FUNCTION: Catalyzes the interconversion between UDP-glucose and UDP-galactose. {ECO:0000269|PubMed:16644739, ECO:0000269|PubMed:19754426}.	351
311193	313500	Mb_4556|QLI73046.1	No match	No match	No match	No match	No match
352248	354212	Mb_4556|QLI73687.1	No match	No match	No match	No match	No match
358406	359013	Mb_4556|QLI73211.1	No match	No match	No match	No match	No match
360826	362839	Mb_4556|QLI73804.1	No match	No match	No match	No match	No match
364773	365240	Mb_4556|QLI73100.1	No match	No match	No match	No match	No match
369137	370846	Mb_4556|QLI72826.1	No match	No match	No match	No match	No match
371246	371743	Mb_4556|QLI73163.1	No match	No match	No match	No match	No match
398578	400912	Mb_4556|QLI73554.1	No match	No match	No match	No match	No match
404019	404629	Mb_4556|QLI73217.1	No match	No match	No match	No match	No match
431419	432258	Mb_4556|QLI73341.1	No match	No match	No match	No match	No match
433714	435075	Mb_4556|QLI73790.1	No match	No match	No match	No match	No match
436135	436752	Mb_4556|QLI72803.1	No match	No match	No match	No match	No match
835539	835955	Mb_4556|QLI73778.1	No match	No match	No match	No match	No match
837359	838148	Mb_4556|QLI72941.1	No match	No match	No match	No match	No match
850343	850742	Mb_4556|QLI73631.1	No match	No match	No match	No match	No match
853509	854679	Mb_4556|QLI72987.1	Q10323	Inositol phosphoceramide mannosyltransferase 3 (EC 2.4.-.-) (IPC mannosyltransferase 3)	Schizosaccharomyces pombe (strain 972 / ATCC 24843) (Fission yeast)	FUNCTION: With imt1 and imt2, is required for the synthesis of mannosylinositol phosphoceramide (MIPC). Catalyzes the addition of mannosyl to inositol phosphoceramide (IPC). MIPC is essential for cell morphology, cell-surface distribution of ergosterol, localization for plasma-membrane transporters, and lipid-raft-mediated endocytosis of plasma membrane proteins to the vacuole. {ECO:0000269|PubMe…	356
905812	910125	Mb_4556|QLI73171.1	O60999	Cullin-1 (CUL-1) (Cullin-A)	Dictyostelium discoideum (Social amoeba)	FUNCTION: Probable core component of cullin-based SCF-like E3 ubiquitin-protein ligase complexes which mediate the ubiquitination and subsequent proteasomal degradation of target proteins. The E3 ubiquitin-protein ligase activity of the complex is dependent on the neddylation of the cullin subunit (By similarity). Required at several stages during development. CulA and fbxA regulate multicellular…	770
911106	912019	Mb_4556|QLI73513.1	No match	No match	No match	No match	No match
1070734	1071729	Mb_4556|QLI73632.1	No match	No match	No match	No match	No match
1076091	1076768	Mb_4556|QLI72969.1	No match	No match	No match	No match	No match
1131902	1132605	Mb_4556|QLI73668.1	No match	No match	No match	No match	No match
1136025	1137104	Mb_4556|QLI73008.1	No match	No match	No match	No match	No match
1829421	1830815	Mb_4556|QLI73811.1	No match	No match	No match	No match	No match
1832114	1833104	Mb_4556|QLI72954.1	Q12726	Homocitrate synthase, mitochondrial (HCS) (EC 2.3.3.14)	Yarrowia lipolytica (strain CLIB 122 / E 150) (Yeast) (Candida lipolytica)	FUNCTION: Catalyzes the aldol-type condensation of 2-oxoglutarate with acetyl-CoA to yield homocitrate. Carries out the first step of the alpha-aminoadipate (AAA) lysine biosynthesis pathway. {ECO:0000250|UniProtKB:O87198}.	446
1874605	1876079	Mb_4556|QLI72808.1	S0E2X6	FAD-dependent monooxygenase bik2 (EC 1.-.-.-) (Bikaverin biosynthesis protein 2)	Gibberella fujikuroi (strain CBS 195.34 / IMI 58289 / NRRL A-6831) (Bakanae and foot rot disease fungus) (Fusarium fujikuroi)	FUNCTION: FAD-dependent monooxygenase; part of the gene cluster that mediates the biosynthesis of bikaverin, a red pigment also considered as a mycotoxin (PubMed:19400779). The first stage is catalyzed by the polyketide synthase bik1, which catalyzes the formation of the intermediate SMA76a also knowm as pre-bikaverin (PubMed:19400779). FAD-dependent monooxygenase bik2 might then be responsible f…	489
1877457	1878071	Mb_4556|QLI73001.1	No match	No match	No match	No match	No match
2887746	2889014	Mb_4556|QLI73825.1	No match	No match	No match	No match	No match
2893596	2895195	Mb_4556|QLI73035.1	No match	No match	No match	No match	No match
3404223	3404696	Mb_4556|QLI73532.1	No match	No match	No match	No match	No match
3405837	3409092	Mb_4556|QLI72895.1	P91863	Endoprotease aex-5 (EC 3.4.21.-) (Subtilisin-like protease)	Caenorhabditis elegans	FUNCTION: Probable serine endoprotease which cleaves preproteins at paired basic amino acids (PubMed:16945111). May process FMRFamide-like (flp) and neuropeptide-like protein (nlp) neuropeptides (PubMed:16945111). In muscles, involved in neuronal retrograde signaling by regulating presynaptic activity and localization of synaptic vesicle fusion protein unc-13 at the neuromuscular junction (NMJ) (…	537
3411562	3417444	Mb_4556|QLI72938.1	Q96JX3	Protein SERAC1 (Serine active site-containing protein 1)	Homo sapiens (Human)	FUNCTION: Plays an important role in the phosphatidylglycerol remodeling that is essential for both mitochondrial function and intracellular cholesterol trafficking. May catalyze the remodeling of phosphatidylglycerol and be involved in the transacylation-acylation reaction to produce phosphatidylglycerol-36:1. May be involved in bis(monoacylglycerol)phosphate biosynthetic pathway. {ECO:0000269|P…	654
3556438	3557272	Mb_4556|QLI73906.1	Q078T0	3-hydroxyphenylacetate 6-hydroxylase (EC 1.14.13.63)	Emericella nidulans (Aspergillus nidulans)	FUNCTION: Catalyzes the hydroxylation of 3-hydroxyphenylacetate and 3,4-dihydroxyphenylacetate to 2,5-dihydroxyphenylacetate (homogentisate) and 2,4,5-trihydroxyphenylacetate, respectively. Both of these compounds are used as substrate by homogentisate dioxygenase in the homogentisate pathway. The homogentisate pathway is used to catabolize phenylacetate and use it as a carbon source. Can also ca…	517
3559082	3560053	Mb_4556|QLI72838.1	No match	No match	No match	No match	No match
3591596	3594546	Mb_4556|QLI73662.1	P00782	Subtilisin BPN' (EC 3.4.21.62) (Alkaline protease) (Subtilisin DFE) (Subtilisin Novo)	Bacillus amyloliquefaciens (Bacillus velezensis)	FUNCTION: Subtilisin is an extracellular alkaline serine protease, it catalyzes the hydrolysis of proteins and peptide amides. Has a high substrate specificity to fibrin. {ECO:0000269|PubMed:12524032}.	382
3594683	3598969	Mb_4556|QLI73699.1	No match	No match	No match	No match	No match
3669085	3671489	Mb_4556|QLI72854.1	Q54EW2	Putative bifunctional amine oxidase DDB_G0291301 [Includes: Putative sarcosine oxidase (PSO) (EC 1.5.3.1) (EC 1.5.3.7); Putative L-amino-acid oxidase (EC 1.4.3.2)]	Dictyostelium discoideum (Social amoeba)	FUNCTION: Catalyzes an oxidative deamination of predominantly hydrophobic and aromatic L-amino acids. Metabolizes sarcosine, L-pipecolic acid and L-proline (By similarity). {ECO:0000250}.	1080
3672286	3677219	Mb_4556|QLI73242.1	No match	No match	No match	No match	No match
3879575	3880108	Mb_4556|QLI73803.1	No match	No match	No match	No match	No match
3882646	3883878	Mb_4556|QLI73026.1	A4GNA8	Phosphatidylserine decarboxylase proenzyme 3 (EC 4.1.1.65) [Cleaved into: Phosphatidylserine decarboxylase 3 beta chain; Phosphatidylserine decarboxylase 3 alpha chain]	Arabidopsis thaliana (Mouse-ear cress)	FUNCTION: Catalyzes the formation of phosphatidylethanolamine (PtdEtn) from phosphatidylserine (PtdSer). Plays a central role in phospholipid metabolism and in the interorganelle trafficking of phosphatidylserine. Contributes only to a minor proportion of PtdEtn production. {ECO:0000255|HAMAP-Rule:MF_03209, ECO:0000269|PubMed:17449644}.	635
3915194	3916687	Mb_4556|QLI73335.1	A0ST43	FAD-dependent monooxygenase CTB5 (EC 1.-.-.-) (Cercosporin toxin biosynthesis cluster protein 5)	Cercospora nicotianae (Barn spot disease fungus)	FUNCTION: FAD-dependent monooxygenase; part of the gene cluster that mediates the biosynthesis of cercosporin, a light-activated, non-host-selective toxin (PubMed:17074519, PubMed:15915645, PubMed:26938470). The perylenequinone chromophore of cercosporin absorbs light energy to attain an electronically-activated triplet state and produces active oxygen species such as the hydroxyl radical, supero…	459
3920307	3921748	Mb_4556|QLI73634.1	Q9LMX7	Cytochrome P450 78A5 (EC 1.14.-.-) (Protein KLUH)	Arabidopsis thaliana (Mouse-ear cress)	FUNCTION: Plays a role in regulating directional growth at the meristem/organ boundary. Is required for the promotion of leaf and floral organ growth and for the prolongation of the plastochron. Promotes organ growth in a non-cell-autonomous manner and may generate a mobile growth signal distinct from the classical phytohormones that prevents premature arrest of proliferation, until the correct p…	517
3922171	3923863	Mb_4556|QLI72777.1	A0ST43	FAD-dependent monooxygenase CTB5 (EC 1.-.-.-) (Cercosporin toxin biosynthesis cluster protein 5)	Cercospora nicotianae (Barn spot disease fungus)	FUNCTION: FAD-dependent monooxygenase; part of the gene cluster that mediates the biosynthesis of cercosporin, a light-activated, non-host-selective toxin (PubMed:17074519, PubMed:15915645, PubMed:26938470). The perylenequinone chromophore of cercosporin absorbs light energy to attain an electronically-activated triplet state and produces active oxygen species such as the hydroxyl radical, supero…	459
3924725	3925870	Mb_4556|QLI73895.1	B1NF18	Salutaridine synthase (EC 1.14.19.67) (Cytochrome P450 719B1)	Papaver somniferum (Opium poppy)	FUNCTION: Cytochrome P450 monooxygenase involved in biosynthesis of morphinan-type benzylisoquinoline and opiate alkaloids natural products (PubMed:19567876, PubMed:22098111). Catalyzes the formation of the morphinan alkaloid salutaridine by intramolecular phenol oxidation of (R)-reticuline without the incorporation of oxygen into the product (PubMed:19567876, PubMed:22098111). Can also use (R)-n…	505
3932324	3939683	Mb_4556|QLI72818.1	Q3U213	Protein SERAC1 (Serine active site-containing protein 1)	Mus musculus (Mouse)	FUNCTION: Plays an important role in the phosphatidylglycerol remodeling that is essential for both mitochondrial function and intracellular cholesterol trafficking. May catalyze the remodeling of phosphatidylglycerol and be involved in the transacylation-acylation reaction to produce phosphatidylglycerol-36:1. May be involved in bis(monoacylglycerol)phosphate biosynthetic pathway (By similarity)…	654
3939758	3940417	Mb_4556|QLI73149.1	No match	No match	No match	No match	No match
3955232	3956633	Mb_4556|QLI73860.1	No match	No match	No match	No match	No match
3957502	3958672	Mb_4556|QLI73266.1	No match	No match	No match	No match	No match
4012627	4014184	Mb_4556|QLI73735.1	No match	No match	No match	No match	No match
4017558	4018136	Mb_4556|QLI73815.1	No match	No match	No match	No match	No match
4019324	4019843	Mb_4556|QLI73406.1	No match	No match	No match	No match	No match
4102609	4103199	Mb_4556|QLI73228.1	No match	No match	No match	No match	No match
4105000	4105748	Mb_4556|QLI73828.1	D4AM78	Chitin deacetylase (EC 3.5.1.41)	Arthroderma benhamiae (strain ATCC MYA-4681 / CBS 112371) (Trichophyton mentagrophytes)	FUNCTION: Hydrolyzes the N-acetamido groups of N-acetyl-D-glucosamine residues in chitin to form chitosan and acetate. {ECO:0000250|UniProtKB:Q6DWK3}.	371

## Sheet: T.reesei
Chromosome ID			Uniprot Match	Protein Name	Species of match	Function (Uniprot)	Uniprot seq length
Chromosome_CP016232.1
18330	18833	Tr_QM6a|TreeseiQM6a_000003-T1	D7PI00	Transcription factor vrtR1 (Viridicatumtoxin synthesis protein R1)	Penicillium aethiopicum	FUNCTION: Probable transcription factor that regulates expression of the gene cluster that mediates the biosynthesis of viridicatumtoxin, a tetracycline-like fungal meroterpenoid with a unique, fused spirobicyclic ring system (PubMed:20534346). {ECO:0000269|PubMed:20534346}.	715
20651	21727	Tr_QM6a|TreeseiQM6a_000004-T1	No match	No match	No match	No match	No match
155773	156187	Tr_QM6a|TreeseiQM6a_000046-T1	No match	No match	No match	No match	No match
158231	159028	Tr_QM6a|TreeseiQM6a_000047-T1	P24665	Aspergillopepsin-2 (EC 3.4.23.19) (Acid protease A) (Aspergillopepsin II) (Proctase A) [Cleaved into: Aspergillopepsin-2 light chain (Aspergillopepsin II light chain); Aspergillopepsin-2 heavy chain (Aspergillopepsin II heavy chain)]	Aspergillus niger		282
166729	167881	Tr_QM6a|TreeseiQM6a_000049-T1	No match	No match	No match	No match	No match
169486	171060	Tr_QM6a|TreeseiQM6a_000050-T1	P55651	Uncharacterized protein y4sH	Sinorhizobium fredii (strain NBRC 101917 / NGR234)	FUNCTION: Could be involved in the biosynthesis of a cell wall component.	461
174610	175805	Tr_QM6a|TreeseiQM6a_000051-T1	No match	No match	No match	No match	No match
207766	208557	Tr_QM6a|TreeseiQM6a_000060-T1	No match	No match	No match	No match	No match
211248	211915	Tr_QM6a|TreeseiQM6a_000061-T1	Q8H151	Malonate--CoA ligase (EC 6.2.1.76) (Acyl-activating enzyme 13) (Malonyl-CoA synthetase)	Arabidopsis thaliana (Mouse-ear cress)	FUNCTION: Malonate--CoA ligase that catalyzes the formation of malonyl-CoA directly from malonate and CoA. May be required for the detoxification of malonate. {ECO:0000269|PubMed:21642549}.	608
241010	241630	Tr_QM6a|TreeseiQM6a_000073-T1	No match	No match	No match	No match	No match
241766	242563	Tr_QM6a|TreeseiQM6a_000074-T1	No match	No match	No match	No match	No match
264381	268619	Tr_QM6a|TreeseiQM6a_000083-T1	No match	No match	No match	No match	No match
273547	275371	Tr_QM6a|TreeseiQM6a_000085-T1	No match	No match	No match	No match	No match
299575	301266	Tr_QM6a|TreeseiQM6a_000097-T1	Q9UV10	Heterokaryon incompatibility protein 6, OR allele (Het-6(OR))	Neurospora crassa (strain ATCC 24698 / 74-OR23-1A / CBS 708.71 / DSM 1257 / FGSC 987)	FUNCTION: Involved in the non-self-recognition during asexual growth of N.crassa. This process involves restriction of heterokaryon formation via genetic differences at 11 het loci, including mating type.	680
301764	302604	Tr_QM6a|TreeseiQM6a_000098-T1	No match	No match	No match	No match	No match
596836	597549	Tr_QM6a|TreeseiQM6a_000188-T1	No match	No match	No match	No match	No match
600317	600670	Tr_QM6a|TreeseiQM6a_000190-T1	No match	No match	No match	No match	No match
634351	635441	Tr_QM6a|TreeseiQM6a_000202-T1	No match	No match	No match	No match	No match
637812	638723	Tr_QM6a|TreeseiQM6a_000203-T1	No match	No match	No match	No match	No match
719849	721200	Tr_QM6a|TreeseiQM6a_000229-T1	B5BP48	Putative alpha-ketoglutarate-dependent sulfonate dioxygenase (EC 1.14.11.-)	Schizosaccharomyces pombe (strain 972 / ATCC 24843) (Fission yeast)	FUNCTION: Acts as an alpha-ketoglutarate-dependent dioxygenase active on sulfonates. {ECO:0000250}.	391
722771	723517	Tr_QM6a|TreeseiQM6a_000230-T1	No match	No match	No match	No match	No match
724251	724673	Tr_QM6a|TreeseiQM6a_000231-T1	No match	No match	No match	No match	No match
1709191	1715152	Tr_QM6a|TreeseiQM6a_000519-T1	Q96NS5	Ankyrin repeat and SOCS box protein 16 (ASB-16)	Homo sapiens (Human)	FUNCTION: May be a substrate-recognition component of a SCF-like ECS (Elongin-Cullin-SOCS-box protein) E3 ubiquitin-protein ligase complex which mediates the ubiquitination and subsequent proteasomal degradation of target proteins. {ECO:0000250}.	453
1717232	1718488	Tr_QM6a|TreeseiQM6a_000521-T1	D7PI10	Transcription factor gsfR2 (Griseofulvin synthesis protein R2A)	Penicillium aethiopicum	FUNCTION: Transcription factor that regulates expression of the gene cluster that mediates the biosynthesis of Griseofulvin, an important antifungal drug that has been in use for a long time for treating dermatophyte infections (PubMed:20534346). {ECO:0000269|PubMed:20534346}.	415
2456516	2457085	Tr_QM6a|TreeseiQM6a_000720-T1	No match	No match	No match	No match	No match
2457698	2457994	Tr_QM6a|TreeseiQM6a_000721-T1	No match	No match	No match	No match	No match
2497221	2498090	Tr_QM6a|TreeseiQM6a_000732-T1	No match	No match	No match	No match	No match
2502126	2503545	Tr_QM6a|TreeseiQM6a_000734-T1	P23262	Salicylate hydroxylase (EC 1.14.13.1) (Salicylate 1-monooxygenase)	Pseudomonas putida (Arthrobacter siderocapsulatus)		434
2507756	2508754	Tr_QM6a|TreeseiQM6a_000736-T1	No match	No match	No match	No match	No match
2620879	2621511	Tr_QM6a|TreeseiQM6a_000761-T1	No match	No match	No match	No match	No match
2625157	2626929	Tr_QM6a|TreeseiQM6a_000764-T1	P14912	4-coumarate--CoA ligase 1 (4CL 1) (EC 6.2.1.12) (4-coumaroyl-CoA synthase 1)	Petroselinum crispum (Parsley) (Petroselinum hortense)	FUNCTION: Carboxylate--CoA ligase that may use 4-coumarate as substrate. Follows a two-step reaction mechanism, wherein the carboxylate substrate first undergoes adenylation by ATP, followed by a thioesterification in the presence of CoA to yield the final CoA thioester. {ECO:0000250|UniProtKB:O24146}.	544
2631671	2633093	Tr_QM6a|TreeseiQM6a_000766-T1	P80576	Phospho-2-dehydro-3-deoxyheptonate aldolase (EC 2.5.1.54) (3-deoxy-D-arabino-heptulosonate 7-phosphate synthase) (DAHP synthase) (Phospho-2-keto-3-deoxyheptonate aldolase)	Neurospora crassa (strain ATCC 24698 / 74-OR23-1A / CBS 708.71 / DSM 1257 / FGSC 987)		481
2636558	2638075	Tr_QM6a|TreeseiQM6a_000768-T1	No match	No match	No match	No match	No match
2639647	2641989	Tr_QM6a|TreeseiQM6a_000769-T1	No match	No match	No match	No match	No match
2696625	2698101	Tr_QM6a|TreeseiQM6a_000781-T1	No match	No match	No match	No match	No match
2698380	2698559	Tr_QM6a|TreeseiQM6a_000782-T1	No match	No match	No match	No match	No match
2883817	2884602	Tr_QM6a|TreeseiQM6a_000833-T1	No match	No match	No match	No match	No match
2886917	2887538	Tr_QM6a|TreeseiQM6a_000835-T1	Q5A287	Transcription factor SFL1	Candida albicans (strain SC5314 / ATCC MYA-2876) (Yeast)	FUNCTION: Transcription factor that plays a role of repressor of filamentous growth and flocculation. Antagonizes functions of SFL2 and FLO8. Plays a role in the hyphal repression induced by secreted factors like dodecanol by competitors such as Pseudomonas aeruginosa and Burkholderia cenocepacia. {ECO:0000269|PubMed:17715361, ECO:0000269|PubMed:17766464, ECO:0000269|PubMed:21205158, ECO:0000269|…	805
4915508	4916716	Tr_QM6a|TreeseiQM6a_001340-T1	Q7Z5M8	Protein ABHD12B (EC 3.-.-.-) (Abhydrolase domain-containing protein 12B) (Alpha/beta hydrolase domain-containing protein 12B)	Homo sapiens (Human)		362
4917221	4917487	Tr_QM6a|TreeseiQM6a_001341-T1	No match	No match	No match	No match	No match
4991806	4993152	Tr_QM6a|TreeseiQM6a_001362-T1	P29141	Minor extracellular protease Vpr (EC 3.4.21.-)	Bacillus subtilis (strain 168)	FUNCTION: Serine protease (PubMed:1938892, PubMed:17666034). Involved in the production of the competence and sporulation stimulating factor CSF (PubMed:17666034). Is directly involved in the processing of pro-CSF to CSF (PubMed:17666034). Can also cleave pro-PhrA to PhrA, but cannot cleave pro-PhrE (PubMed:17666034). Shows fibrinolytic activity in vitro (PubMed:15596354). Not essential for growt…	806
4993235	4994365	Tr_QM6a|TreeseiQM6a_001363-T1	P29141	Minor extracellular protease Vpr (EC 3.4.21.-)	Bacillus subtilis (strain 168)	FUNCTION: Serine protease (PubMed:1938892, PubMed:17666034). Involved in the production of the competence and sporulation stimulating factor CSF (PubMed:17666034). Is directly involved in the processing of pro-CSF to CSF (PubMed:17666034). Can also cleave pro-PhrA to PhrA, but cannot cleave pro-PhrE (PubMed:17666034). Shows fibrinolytic activity in vitro (PubMed:15596354). Not essential for growt…	806
4995786	4997115	Tr_QM6a|TreeseiQM6a_001364-T1	No match	No match	No match	No match	No match
5860192	5860776	Tr_QM6a|TreeseiQM6a_001587-T1	No match	No match	No match	No match	No match
5861526	5862675	Tr_QM6a|TreeseiQM6a_001588-T1	O27472	Uncharacterized protein MTH_1421	Methanothermobacter thermautotrophicus (strain ATCC 29096 / DSM 1053 / JCM 10044 / NBRC 100330 / Delta H) (Methanobacterium thermoautotrophicum)		399
5930063	5930617	Tr_QM6a|TreeseiQM6a_001611-T1	No match	No match	No match	No match	No match
5933769	5936682	Tr_QM6a|TreeseiQM6a_001613-T1	Q1E3R8	Endochitinase 1 (EC 3.2.1.14) (Complement-fixation antigen) (CF-AG) (CF-antigen)	Coccidioides immitis (strain RS) (Valley fever fungus)		427
5940522	5940947	Tr_QM6a|TreeseiQM6a_001615-T1	No match	No match	No match	No match	No match
5941140	5941957	Tr_QM6a|TreeseiQM6a_001616-T1	No match	No match	No match	No match	No match
5963446	5964228	Tr_QM6a|TreeseiQM6a_001625-T1	No match	No match	No match	No match	No match
5964851	5965261	Tr_QM6a|TreeseiQM6a_001626-T1	No match	No match	No match	No match	No match
5988017	5989206	Tr_QM6a|TreeseiQM6a_001632-T1	No match	No match	No match	No match	No match
5989606	5991541	Tr_QM6a|TreeseiQM6a_001633-T1	No match	No match	No match	No match	No match
6010224	6011108	Tr_QM6a|TreeseiQM6a_001639-T1	Q7Z9M7	AA9 family lytic polysaccharide monooxygenase cel61B (LPMO9 cel61B) (EC 3.2.1.4) (Cellulase-61B) (Cel61B) (Endo-beta-1,4-glucanase cel61B) (Endoglucanase cel61B) (Endoglucanase-7) (Glycosyl hydrolase 61 family protein cel61B)	Hypocrea jecorina (strain QM6a) (Trichoderma reesei)	FUNCTION: Lytic polysaccharide monooxygenase (LMPO) that depolymerizes crystalline and amorphous polysaccharides via the oxidation of scissile alpha- or beta-(1-4)-glycosidic bonds, yielding C1 or C4 oxidation products (PubMed:18723026). Catalysis by LPMOs requires the reduction of the active-site copper from Cu(II) to Cu(I) by a reducing agent and H(2)O(2) or O(2) as a cosubstrate (PubMed:187230…	249
6014738	6016879	Tr_QM6a|TreeseiQM6a_001640-T1	No match	No match	No match	No match	No match
6017820	6019727	Tr_QM6a|TreeseiQM6a_001641-T1	No match	No match	No match	No match	No match
6071212	6071998	Tr_QM6a|TreeseiQM6a_001654-T1	P41808	Sporulation-specific mitogen-activated protein kinase SMK1 (MAP kinase SMK1) (EC 2.7.11.24)	Saccharomyces cerevisiae (strain ATCC 204508 / S288c) (Baker's yeast)	FUNCTION: Required for spore wall assembly. Required for proper deposition of the two outer layers of the spore wall, the chitosan and dityrosine layers. Negatively regulates GSC2, an alternate catalytic subunit of the 1,3-beta-glucan synthase (GS). Participates in a developmentally regulated signal transduction pathway that coordinates cytodifferentiation events with the transcriptional program.…	388
6073958	6074546	Tr_QM6a|TreeseiQM6a_001655-T1	P9WPJ6	Beta-carbonic anhydrase 1 (Beta-CA 1) (EC 4.2.1.1) (Carbonate dehydratase 1) (mtCA 1)	Mycobacterium tuberculosis (strain CDC 1551 / Oshkosh)	FUNCTION: Catalyzes the reversible hydration of carbon dioxide to form bicarbonate. {ECO:0000250}.	163
6076409	6078007	Tr_QM6a|TreeseiQM6a_001657-T1	No match	No match	No match	No match	No match
6079734	6080512	Tr_QM6a|TreeseiQM6a_001658-T1	No match	No match	No match	No match	No match
6322851	6323608	Tr_QM6a|TreeseiQM6a_001722-T1	A7UX13	Hercynylcysteine sulfoxide lyase (EC 4.4.1.-) (Ergothioneine biosynthesis protein 2) (PLP-binding cysteine desulfurase) (PLP-dependent C-S lyase)	Neurospora crassa (strain ATCC 24698 / 74-OR23-1A / CBS 708.71 / DSM 1257 / FGSC 987)	FUNCTION: Catalyzes the conversion of hercynylcysteine sulfoxide to ergothioneine by cleaving the cysteine residue at the sulfur atom, the last step in the biosynthesis pathway of ergothioneine. {ECO:0000269|PubMed:25275953}.	473
6324288	6324821	Tr_QM6a|TreeseiQM6a_001723-T1	P40037	Protein HMF1 (High dosage growth inhibitor) (Homologous mitochondrial matrix factor 1)	Saccharomyces cerevisiae (strain ATCC 204508 / S288c) (Baker's yeast)		129
6329427	6330964	Tr_QM6a|TreeseiQM6a_001725-T1	Q7M4T0	Endo-1,6-beta-D-glucanase (EC 3.2.1.75) (Beta-1,6-glucanase Neg1) (Glucan endo-1,6-beta-glucosidase)	Neurospora crassa (strain ATCC 24698 / 74-OR23-1A / CBS 708.71 / DSM 1257 / FGSC 987)	FUNCTION: Partially degrades N.crassa cell wall beta-D-glucan, liberating small amounts of oligosaccharides.	480
6388862	6389635	Tr_QM6a|TreeseiQM6a_001738-T1	No match	No match	No match	No match	No match
6390504	6391304	Tr_QM6a|TreeseiQM6a_001739-T1	No match	No match	No match	No match	No match
6647594	6649433	Tr_QM6a|TreeseiQM6a_001808-T1	A2QEQ6	Beta-glucuronidase (GlcAase) (EC 3.2.1.31) (Beta-D-glucuronoside glucuronosohydrolase)	Aspergillus niger (strain ATCC MYA-4892 / CBS 513.88 / FGSC A1513)	FUNCTION: Beta-glucuronidase that hydrolyzes beta-glucuronosyl and 4-O-methyl-beta-glucuronosyl residues of arabinogalactan-protein. Hydrolyzed heparan sulfate only very weakly. Has no activity on xylan from birchwood. Able to catalyze the transglycosylation of glucuronic acid (GlcA) residues from p-nitrophenyl-beta-glucuronic acid (PNP beta-GlcA) to various monosaccharide acceptors such as gluco…	541
6650117	6651240	Tr_QM6a|TreeseiQM6a_001809-T1	O95154	Aflatoxin B1 aldehyde reductase member 3 (EC 1.-.-.-) (AFB1 aldehyde reductase 2) (AFB1-AR 2)	Homo sapiens (Human)	FUNCTION: Can reduce the dialdehyde protein-binding form of aflatoxin B1 (AFB1) to the non-binding AFB1 dialcohol. May be involved in protection of liver against the toxic and carcinogenic effects of AFB1, a potent hepatocarcinogen. {ECO:0000269|PubMed:18416522}.	331
6710615	6711808	Tr_QM6a|TreeseiQM6a_001834-T1	L7X8G0	Dehydrocurvularin biosynthesis regulator	Aspergillus terreus	FUNCTION: Transcription factor involved in regulation of the dehydrocurvularin biosynthesis gene cluster (PubMed:23335766). {ECO:0000305|PubMed:23335766}.	728
6713804	6714802	Tr_QM6a|TreeseiQM6a_001835-T1	A6SSW9	Oxidoreductase BOA17 (EC 1.-.-.-) (Botcinic acid biosynthesis cluster B protein 17)	Botryotinia fuckeliana (strain B05.10) (Noble rot fungus) (Botrytis cinerea)	FUNCTION: Oxidoreductase; part of the gene cluster B that mediates the biosynthesis of botcinic acid and its botcinin derivatives, acetate-derived polyketides that contribute to virulence when combined with the sesquiterpene botrydial (PubMed:21722295). Botcinic acid and its derivatives have been shown to induce chlorosis and necrosis during host plant infection, but also have antifungal activiti…	274
6754226	6755304	Tr_QM6a|TreeseiQM6a_001849-T1	No match	No match	No match	No match	No match
6755662	6756263	Tr_QM6a|TreeseiQM6a_001850-T1	No match	No match	No match	No match	No match
Chromosome_CP016233.1
20534	21976	Tr_QM6a|TreeseiQM6a_001868-T1	Q9UT27	Pyruvyl transferase 1 (EC 2.-.-.-) (Pyruvylated Gal-beta-1,3-epitope synthesis protein 1) (PvGal synthesis protein 1)	Schizosaccharomyces pombe (strain 972 / ATCC 24843) (Fission yeast)	FUNCTION: Involved in cell wall biogenesis. Has a role in the addition of Gal-beta1,3 moieties to galactomannans and their subsequent pyruvylation. {ECO:0000269|PubMed:15173185}.	401
22704	24059	Tr_QM6a|TreeseiQM6a_001869-T1	No match	No match	No match	No match	No match
29369	30529	Tr_QM6a|TreeseiQM6a_001870-T1	Q9UUI8	Uncharacterized transporter C22F8.04	Schizosaccharomyces pombe (strain 972 / ATCC 24843) (Fission yeast)		383
31833	32880	Tr_QM6a|TreeseiQM6a_001871-T1	No match	No match	No match	No match	No match
34245	35495	Tr_QM6a|TreeseiQM6a_001872-T1	L0MZK0	O-glycosyltransferase PaGT (EC 2.4.1.-) (Fusicoccin A biosynthetic gene clusters protein 6)	Phomopsis amygdali (Fusicoccum amygdali)	FUNCTION: O-glycosyltransferase; part of the 2 gene clusters that mediate the biosynthesis of fusicoccins, diterpene glucosides that display phytohormone-like activity and function as potent activators of plasma membrane H(+)-ATPases in plants by modifying 14-3-3 proteins and cause the plant disease constriction canker (PubMed:22870285). The first step in the pathway is performed by the fusicocca…	406
38626	40470	Tr_QM6a|TreeseiQM6a_001874-T1	P31434	Alpha-xylosidase (EC 3.2.1.177)	Escherichia coli (strain K12)	FUNCTION: Can catalyze the transfer of alpha-xylosyl residue from alpha-xyloside to xylose, glucose, mannose, fructose, maltose, isomaltose, nigerose, kojibiose, sucrose and trehalose. {ECO:0000269|PubMed:15294295, ECO:0000269|PubMed:15501829}.	772
190171	191220	Tr_QM6a|TreeseiQM6a_001919-T1	A0ST44	Ketoreductase CTB6 (EC 1.-.-.-) (Cercosporin toxin biosynthesis cluster protein 6)	Cercospora nicotianae (Barn spot disease fungus)	FUNCTION: Ketoreductase; part of the gene cluster that mediates the biosynthesis of cercosporin, a light-activated, non-host-selective toxin (PubMed:17074519, PubMed:15915645, PubMed:26938470). The perylenequinone chromophore of cercosporin absorbs light energy to attain an electronically-activated triplet state and produces active oxygen species such as the hydroxyl radical, superoxide, hydrogen…	357
195902	196639	Tr_QM6a|TreeseiQM6a_001921-T1	No match	No match	No match	No match	No match
288855	290381	Tr_QM6a|TreeseiQM6a_001944-T1	No match	No match	No match	No match	No match
290540	291437	Tr_QM6a|TreeseiQM6a_001945-T1	No match	No match	No match	No match	No match
553394	554433	Tr_QM6a|TreeseiQM6a_002031-T1	Q3APK7	Probable GTP-binding protein EngB	Chlorobium chlorochromatii (strain CaD3)	FUNCTION: Necessary for normal cell division and for the maintenance of normal septation. {ECO:0000255|HAMAP-Rule:MF_00321}.	194
556106	556381	Tr_QM6a|TreeseiQM6a_002032-T1	No match	No match	No match	No match	No match
559098	559880	Tr_QM6a|TreeseiQM6a_002033-T1	No match	No match	No match	No match	No match
707013	715065	Tr_QM6a|TreeseiQM6a_002074-T1	No match	No match	No match	No match	No match
718246	719141	Tr_QM6a|TreeseiQM6a_002075-T1	No match	No match	No match	No match	No match
794001	794727	Tr_QM6a|TreeseiQM6a_002086-T1	No match	No match	No match	No match	No match
797963	799549	Tr_QM6a|TreeseiQM6a_002087-T1	No match	No match	No match	No match	No match
815652	816031	Tr_QM6a|TreeseiQM6a_002091-T1	No match	No match	No match	No match	No match
817833	818861	Tr_QM6a|TreeseiQM6a_002092-T1	No match	No match	No match	No match	No match
824299	826002	Tr_QM6a|TreeseiQM6a_002094-T1	Q0D1P6	Efflux pump terG (Terrein biosynthesis cluster protein terG)	Aspergillus terreus (strain NIH 2624 / FGSC A1156)	FUNCTION: Efflux pump that might be required for efficient secretion of terrein or other secondary metabolies produced by the terrein genne cluster (PubMed:24816227). {ECO:0000269|PubMed:24816227}.	531
827315	830257	Tr_QM6a|TreeseiQM6a_002095-T1	No match	No match	No match	No match	No match
833381	834963	Tr_QM6a|TreeseiQM6a_002096-T1	Q9QXE5	Thymus-specific serine protease (EC 3.4.-.-) (Serine protease 16)	Mus musculus (Mouse)	FUNCTION: Protease that may play a role in T-cell development.	509
836589	838305	Tr_QM6a|TreeseiQM6a_002097-T1	No match	No match	No match	No match	No match
1032123	1034235	Tr_QM6a|TreeseiQM6a_002166-T1	No match	No match	No match	No match	No match
1036581	1037123	Tr_QM6a|TreeseiQM6a_002168-T1	No match	No match	No match	No match	No match
1085197	1086126	Tr_QM6a|TreeseiQM6a_002183-T1	No match	No match	No match	No match	No match
1087365	1087985	Tr_QM6a|TreeseiQM6a_002184-T1	No match	No match	No match	No match	No match
1192924	1193430	Tr_QM6a|TreeseiQM6a_002220-T1	No match	No match	No match	No match	No match
1195899	1197803	Tr_QM6a|TreeseiQM6a_002222-T1	O06724	Uncharacterized protein YisK	Bacillus subtilis (strain 168)		301
1245671	1246102	Tr_QM6a|TreeseiQM6a_002238-T1	P34762	Conidiation-specific protein 6	Neurospora crassa (strain ATCC 24698 / 74-OR23-1A / CBS 708.71 / DSM 1257 / FGSC 987)	FUNCTION: May protect dormant spores from desiccation and play a significant role in the formation or survival of microconidia and ascospores.	93
1246874	1247200	Tr_QM6a|TreeseiQM6a_002239-T1	No match	No match	No match	No match	No match
1247840	1248850	Tr_QM6a|TreeseiQM6a_002240-T1	P54202	Alcohol dehydrogenase 2 (EC 1.1.1.1) (Alcohol dehydrogenase II) (ADH II)	Emericella nidulans (strain FGSC A4 / ATCC 38163 / CBS 112.46 / NRRL 194 / M139) (Aspergillus nidulans)		367
1267231	1268920	Tr_QM6a|TreeseiQM6a_002249-T1	O13716	Glucan endo-1,3-alpha-glucosidase agn1 (EC 3.2.1.59) (Endo-1,3-alpha-glucanase agn1)	Schizosaccharomyces pombe (strain 972 / ATCC 24843) (Fission yeast)	FUNCTION: Has a role in cell separation where it is required for the degradation of the cell wall material surrounding the septum (the septum edging) which must be hydrolyzed before full separation of the daughter cells can occur. Hydrolyzes 1,3-alpha-glucan predominantly into pentasaccharides. {ECO:0000269|PubMed:15194814}.	424
1271722	1272041	Tr_QM6a|TreeseiQM6a_002250-T1	No match	No match	No match	No match	No match
1773290	1774739	Tr_QM6a|TreeseiQM6a_002397-T1	No match	No match	No match	No match	No match
1776260	1778139	Tr_QM6a|TreeseiQM6a_002398-T1	No match	No match	No match	No match	No match
3009519	3010071	Tr_QM6a|TreeseiQM6a_002721-T1	No match	No match	No match	No match	No match
3011149	3011862	Tr_QM6a|TreeseiQM6a_002722-T1	No match	No match	No match	No match	No match
3135369	3137174	Tr_QM6a|TreeseiQM6a_002755-T1	P34331	Serine/threonine-protein kinase plk-1 (EC 2.7.11.21) (Polo-like kinase 1)	Caenorhabditis elegans	FUNCTION: Required for oocyte nuclear envelope breakdown before entry of oocyte into spermatheca (PubMed:10660671). In meiotic cells, required for spindle dynamics and probably for spindle attachment to the chromosomes (PubMed:10660671). Zygotic role in the development of the germline and nerve cord (PubMed:10660671). In mitotic cells, plays a role in spindle organization and centrosome maturatio…	649
3137806	3138981	Tr_QM6a|TreeseiQM6a_002756-T1	No match	No match	No match	No match	No match
4741014	4742894	Tr_QM6a|TreeseiQM6a_003170-T1	No match	No match	No match	No match	No match
4742970	4744856	Tr_QM6a|TreeseiQM6a_003171-T1	No match	No match	No match	No match	No match
5410386	5410877	Tr_QM6a|TreeseiQM6a_003359-T1	No match	No match	No match	No match	No match
5411104	5413171	Tr_QM6a|TreeseiQM6a_003360-T1	No match	No match	No match	No match	No match
5414517	5416544	Tr_QM6a|TreeseiQM6a_003361-T1	I1S163	Cytochrome P450 monooxygenase FSL4 (EC 1.-.-.-) (Fusarielin biosynthesis cluster protein 4)	Gibberella zeae (strain ATCC MYA-4620 / CBS 123657 / FGSC 9075 / NRRL 31084 / PH-1) (Wheat head blight fungus) (Fusarium graminearum)	FUNCTION: Cytochrome P450 monooxygenase; part of the gene cluster that mediates the biosynthesis of fusarielins F, G and H, decaketide compounds with 5 methylations and a decaline core that act as mycoestrogens as they stimulate growth of MCF-7 breast cancer cells (PubMed:22252016, PubMed:27983606). The initial compound in the pathway is produced by the reducing polyketide synthase FSL1. FSL1 lac…	557
5439896	5441420	Tr_QM6a|TreeseiQM6a_003370-T1	No match	No match	No match	No match	No match
5443130	5443717	Tr_QM6a|TreeseiQM6a_003371-T1	No match	No match	No match	No match	No match
5538011	5538634	Tr_QM6a|TreeseiQM6a_003405-T1	No match	No match	No match	No match	No match
5543008	5544856	Tr_QM6a|TreeseiQM6a_003408-T1	P04413	Serine/threonine-protein kinase US3 (EC 2.7.11.1)	Human herpesvirus 1 (strain 17) (HHV-1) (Human herpes simplex virus 1)	FUNCTION: Multifunctional serine/threonine kinase that plays a role in several processes including egress of virus particles from the nucleus, modulation of the actin cytoskeleton and inhibition of host immune response (PubMed:25907557, PubMed:31249678, PubMed:34935440). Phosphorylates UL31 and UL34, two critical regulators of capsid budding from nucleus to endoplasmic reticulum, thereby facilita…	481
5568514	5569771	Tr_QM6a|TreeseiQM6a_003413-T1	No match	No match	No match	No match	No match
5571766	5574201	Tr_QM6a|TreeseiQM6a_003415-T1	No match	No match	No match	No match	No match
5575822	5577596	Tr_QM6a|TreeseiQM6a_003416-T1	A5D1G6	5-methylthioadenosine/S-adenosylhomocysteine deaminase (MTA/SAH deaminase) (EC 3.5.4.28) (EC 3.5.4.31)	Pelotomaculum thermopropionicum (strain DSM 13744 / JCM 10971 / SI)	FUNCTION: Catalyzes the deamination of 5-methylthioadenosine and S-adenosyl-L-homocysteine into 5-methylthioinosine and S-inosyl-L-homocysteine, respectively. Is also able to deaminate adenosine. {ECO:0000255|HAMAP-Rule:MF_01281}.	433
5665244	5666656	Tr_QM6a|TreeseiQM6a_003448-T1	No match	No match	No match	No match	No match
5670852	5674107	Tr_QM6a|TreeseiQM6a_003450-T1	No match	No match	No match	No match	No match
5845983	5846915	Tr_QM6a|TreeseiQM6a_003493-T1	Q8CEE7	Retinol dehydrogenase 13 (EC 1.1.1.300)	Mus musculus (Mouse)	FUNCTION: Retinol dehydrogenase with a clear preference for NADP. Oxidizes all-trans-retinol, but seems to reduce all-trans-retinal with much higher efficiency. Has no activity towards steroid. {ECO:0000250|UniProtKB:Q8NBN7}.	334
5848073	5849517	Tr_QM6a|TreeseiQM6a_003494-T1	No match	No match	No match	No match	No match
5925169	5925387	Tr_QM6a|TreeseiQM6a_003516-T1	No match	No match	No match	No match	No match
5926453	5928172	Tr_QM6a|TreeseiQM6a_003517-T1	No match	No match	No match	No match	No match
5928789	5930869	Tr_QM6a|TreeseiQM6a_003518-T1	A6SSW6	Transcription factor BOA15 (Botcinic acid biosynthesis cluster B protein 15)	Botryotinia fuckeliana (strain B05.10) (Noble rot fungus) (Botrytis cinerea)	FUNCTION: Transcription factor that probably coregulates the gene clusters that mediates the biosynthesis of botcinin acid and its botcinin derivatives, acetate-derived polyketides that contribute to virulence when combined with the sesquiterpene botrydial (Probable). Botcinin acid and its derivatives have been shown to induce chlorosis and necrosis during host plant infection, but also have anti…	179
5948876	5951263	Tr_QM6a|TreeseiQM6a_003524-T1	A2R797	Probable alpha-fucosidase A (EC 3.2.1.51) (Alpha-L-fucoside fucohydrolase A)	Aspergillus niger (strain ATCC MYA-4892 / CBS 513.88 / FGSC A1513)	FUNCTION: Alpha-fucosidase involved in degradation of fucosylated xyloglucans. Hydrolyzes alpha-1,2-linked fucose (By similarity). {ECO:0000250}.	793
5953641	5954351	Tr_QM6a|TreeseiQM6a_003526-T1	No match	No match	No match	No match	No match
5966482	5967418	Tr_QM6a|TreeseiQM6a_003533-T1	No match	No match	No match	No match	No match
5969219	5969671	Tr_QM6a|TreeseiQM6a_003534-T1	No match	No match	No match	No match	No match
6093558	6095259	Tr_QM6a|TreeseiQM6a_003574-T1	No match	No match	No match	No match	No match
6097779	6099248	Tr_QM6a|TreeseiQM6a_003576-T1	No match	No match	No match	No match	No match
6188844	6190301	Tr_QM6a|TreeseiQM6a_003590-T1	No match	No match	No match	No match	No match
6192529	6193759	Tr_QM6a|TreeseiQM6a_003591-T1	G0RV93	4-O-methyl-glucuronoyl methylesterase (EC 3.1.1.117) (Glucuronoyl esterase) (GE)	Hypocrea jecorina (strain QM6a) (Trichoderma reesei)	FUNCTION: Glucuronoyl esterase which may play a significant role in biomass degradation, as it is considered to disconnect hemicellulose from lignin through the hydrolysis of the ester bond between 4-O-methyl-D-glucuronic acid residues of glucuronoxylans and aromatic alcohols of lignin. Does not hydrolyze substrates of other carbohydrate esterases such as acetylxylan esterase, acetyl esterase and…	460
Chromosome_CP016234.1
46618	47331	Tr_QM6a|TreeseiQM6a_003612-T1	No match	No match	No match	No match	No match
50362	51123	Tr_QM6a|TreeseiQM6a_003615-T1	No match	No match	No match	No match	No match
303865	304263	Tr_QM6a|TreeseiQM6a_003674-T1	No match	No match	No match	No match	No match
304413	305698	Tr_QM6a|TreeseiQM6a_003675-T1	No match	No match	No match	No match	No match
310338	312149	Tr_QM6a|TreeseiQM6a_003677-T1	No match	No match	No match	No match	No match
312369	314520	Tr_QM6a|TreeseiQM6a_003678-T1	No match	No match	No match	No match	No match
325252	327671	Tr_QM6a|TreeseiQM6a_003681-T1	No match	No match	No match	No match	No match
332481	334385	Tr_QM6a|TreeseiQM6a_003683-T1	No match	No match	No match	No match	No match
347056	348440	Tr_QM6a|TreeseiQM6a_003688-T1	No match	No match	No match	No match	No match
350411	350665	Tr_QM6a|TreeseiQM6a_003689-T1	No match	No match	No match	No match	No match
350954	351211	Tr_QM6a|TreeseiQM6a_003690-T1	No match	No match	No match	No match	No match
606343	606948	Tr_QM6a|TreeseiQM6a_003757-T1	No match	No match	No match	No match	No match
609214	609639	Tr_QM6a|TreeseiQM6a_003758-T1	No match	No match	No match	No match	No match
2593686	2595611	Tr_QM6a|TreeseiQM6a_004262-T1	Q3UMW7	MAP kinase-activated protein kinase 3 (MAPK-activated protein kinase 3) (MAPKAP kinase 3) (MAPKAP-K3) (MAPKAPK-3) (MK-3) (EC 2.7.11.1)	Mus musculus (Mouse)	FUNCTION: Stress-activated serine/threonine-protein kinase involved in cytokines production, endocytosis, cell migration, chromatin remodeling and transcriptional regulation. Following stress, it is phosphorylated and activated by MAP kinase p38-alpha/MAPK14, leading to phosphorylation of substrates. Phosphorylates serine in the peptide sequence, Hyd-X-R-X(2)-S, where Hyd is a large hydrophobic r…	384
2596888	2598687	Tr_QM6a|TreeseiQM6a_004263-T1	No match	No match	No match	No match	No match
2691206	2692150	Tr_QM6a|TreeseiQM6a_004289-T1	No match	No match	No match	No match	No match
2694936	2697530	Tr_QM6a|TreeseiQM6a_004291-T1	No match	No match	No match	No match	No match
2941227	2942831	Tr_QM6a|TreeseiQM6a_004354-T1	Q7T2E3	Casein kinase I isoform delta-A (CKI-delta-A) (CKId-A) (EC 2.7.11.1) (Casein kinase I isoform delta-like)	Danio rerio (Zebrafish) (Brachydanio rerio)	FUNCTION: Casein kinases are operationally defined by their preferential utilization of acidic proteins such as caseins as substrates. Central component of the circadian clock. May act as a negative regulator of circadian rhythmicity by phosphorylating per1 and per2, which may lead to their degradation. Participates in wnt signaling (By similarity). {ECO:0000250}.	403
2945920	2946781	Tr_QM6a|TreeseiQM6a_004356-T1	No match	No match	No match	No match	No match
3089233	3089744	Tr_QM6a|TreeseiQM6a_004389-T1	No match	No match	No match	No match	No match
3093933	3094727	Tr_QM6a|TreeseiQM6a_004391-T1	No match	No match	No match	No match	No match
3097330	3098484	Tr_QM6a|TreeseiQM6a_004392-T1	Q6RVV4	Short-chain dehydrogenase TIC 32, chloroplastic (EC 1.1.1.-) (Translocon at the inner envelope membrane of chloroplasts 32) (PsTIC32)	Pisum sativum (Garden pea) (Lathyrus oleraceus)	FUNCTION: Involved in protein precursor import into chloroplasts. Part of the redox regulon consisting of TIC32, TIC 55 and TIC62. Has a NADPH-dependent dehydrogenase activity, but only after preincubation with lipids. {ECO:0000269|PubMed:17035502}.	316
3475253	3475883	Tr_QM6a|TreeseiQM6a_004497-T1	No match	No match	No match	No match	No match
3476392	3477789	Tr_QM6a|TreeseiQM6a_004498-T1	No match	No match	No match	No match	No match
4129346	4130712	Tr_QM6a|TreeseiQM6a_004670-T1	No match	No match	No match	No match	No match
4131732	4133696	Tr_QM6a|TreeseiQM6a_004671-T1	No match	No match	No match	No match	No match
4646733	4647689	Tr_QM6a|TreeseiQM6a_004798-T1	O74822	Zinc-type alcohol dehydrogenase-like protein C337.11 (EC 1.-.-.-)	Schizosaccharomyces pombe (strain 972 / ATCC 24843) (Fission yeast)		325
4650388	4651200	Tr_QM6a|TreeseiQM6a_004800-T1	No match	No match	No match	No match	No match
4651919	4652441	Tr_QM6a|TreeseiQM6a_004801-T1	M1W271	Decarboxylase CPUR_05434 (EC 4.1.1.-) (Ergochrome gene cluster protein CPUR_05434)	Claviceps purpurea (strain 20.1) (Ergot fungus) (Sphacelia segetum)	FUNCTION: Decarboxylase; part of the ergochrome gene cluster responsible for the typical purple-black color of the ergot sclerotia (PubMed:28955461). The ergochrome gene cluster produces several ergot pigments including the yellow ergochrome secalonic acid and its derivatives, as well as the red anthraquinones endocrocin and clavorubin (PubMed:28955461). The pathway begins with the synthesis of a…	141
4677129	4679966	Tr_QM6a|TreeseiQM6a_004812-T1	No match	No match	No match	No match	No match
4682180	4682965	Tr_QM6a|TreeseiQM6a_004814-T1	No match	No match	No match	No match	No match
4804526	4807438	Tr_QM6a|TreeseiQM6a_004854-T1	P29141	Minor extracellular protease Vpr (EC 3.4.21.-)	Bacillus subtilis (strain 168)	FUNCTION: Serine protease (PubMed:1938892, PubMed:17666034). Involved in the production of the competence and sporulation stimulating factor CSF (PubMed:17666034). Is directly involved in the processing of pro-CSF to CSF (PubMed:17666034). Can also cleave pro-PhrA to PhrA, but cannot cleave pro-PhrE (PubMed:17666034). Shows fibrinolytic activity in vitro (PubMed:15596354). Not essential for growt…	806
4810176	4810778	Tr_QM6a|TreeseiQM6a_004857-T1	No match	No match	No match	No match	No match
4994806	4999078	Tr_QM6a|TreeseiQM6a_004902-T1	P56823	Hemocyanin, beta-C chain unit G	Helix pomatia (Roman snail) (Edible snail)	FUNCTION: Hemocyanins are copper-containing oxygen carriers occurring freely dissolved in the hemolymph of many mollusks and arthropods.	404
5000315	5001884	Tr_QM6a|TreeseiQM6a_004903-T1	No match	No match	No match	No match	No match
5005172	5006488	Tr_QM6a|TreeseiQM6a_004905-T1	No match	No match	No match	No match	No match
5065709	5066513	Tr_QM6a|TreeseiQM6a_004918-T1	No match	No match	No match	No match	No match
5071383	5072576	Tr_QM6a|TreeseiQM6a_004921-T1	No match	No match	No match	No match	No match
5140027	5141820	Tr_QM6a|TreeseiQM6a_004941-T1	No match	No match	No match	No match	No match
5142100	5143637	Tr_QM6a|TreeseiQM6a_004942-T1	No match	No match	No match	No match	No match
5144994	5145398	Tr_QM6a|TreeseiQM6a_004943-T1	No match	No match	No match	No match	No match
5246020	5248576	Tr_QM6a|TreeseiQM6a_004970-T1	F1DBA9	Non-reducing polyketide synthase mapC (EC 2.3.1.-) (Mycophenolic acid biosynthesis cluster protein C)	Penicillium brevicompactum	FUNCTION: Non-reducing polyketide synthase; part of the gene cluster that mediates the biosynthesis of mycophenolic acid (MPA), the first isolated antibiotic natural product in the world obtained from a culture of Penicillium brevicompactum in 1893 (PubMed:21398490, PubMed:21398493). MpaC catalyzes the synthesis of 5-methylorsellinic acid (5MOA) via the condensation of 1 acetyl-CoA starter unit w…	2448
5249218	5252526	Tr_QM6a|TreeseiQM6a_004971-T1	A0A1B1ZGB5	Adenylate-forming reductase Nps10 (EC 1.2.1.-) (Nonribosomal peptide synthase-like enzyme 10) (NRPS-like) (Phenylpyruvate reductase)	Heterobasidion annosum (Root rot fungus) (Polyporus annosus)	FUNCTION: Adenylate-forming reductase, a natural product biosynthesis enzyme that resembles non-ribosomal peptide synthetases, yet serves to modify one substrate, rather than to condense two or more building blocks. The A-domain preferentially accepts phenylpyruvic acid and benzoic acid as substrate. The natural product of the enzyme is not yet known. {ECO:0000269|PubMed:27457378}.	1088
5255160	5256984	Tr_QM6a|TreeseiQM6a_004973-T1	W7MWX4	Putative aldehyde dehydrogenase FUS7 (EC 1.2.1.3) (Fusarin biosynthesis protein 7)	Gibberella moniliformis (strain M3125 / FGSC 7600) (Maize ear and stalk rot fungus) (Fusarium verticillioides)	FUNCTION: Putative aldehyde dehydrogenase; part of the gene cluster that mediates the biosynthesis of the mycotoxin fusarin C (PubMed:22652150). Within the cluster, FUS1, FUS2, FUS8 and FUS9 are sufficient for fusarin production (By similarity). The other FUS cluster members are not essential for fusarin C biosynthesis (By similarity). {ECO:0000250|UniProtKB:S0ENH1, ECO:0000269|PubMed:22652150}.	461
5260156	5261360	Tr_QM6a|TreeseiQM6a_004975-T1	B1GVX5	Oxidoreductase BOA1 (EC 1.3.1.-) (Botcinic acid biosynthesis cluster A protein 1)	Botryotinia fuckeliana (strain B05.10) (Noble rot fungus) (Botrytis cinerea)	FUNCTION: Oxidoreductase; part of the gene cluster A that mediates the biosynthesis of botcinic acid and its botcinin derivatives, acetate-derived polyketides that contribute to virulence when combined with the sesquiterpene botrydial (PubMed:18208491, PubMed:21722295). Botcinic acid and its derivatives have been shown to induce chlorosis and necrosis during host plant infection, but also have an…	300
5298456	5300732	Tr_QM6a|TreeseiQM6a_004983-T1	M1W853	Ergochrome gene cluster transcriptional regulator CPUR_05433 (Ergochrome gene cluster protein CPUR_05433)	Claviceps purpurea (strain 20.1) (Ergot fungus) (Sphacelia segetum)	FUNCTION: Transcription factor; part of the gene cluster responsible for the typical purple-black color of the ergot sclerotia (PubMed:28955461). The ergochrome gene cluster produces several ergot pigments including the yellow ergochrome secalonic acid and its derivatives, as well as the red anthraquinones endocrocin and clavorubin (PubMed:28955461). {ECO:0000269|PubMed:28955461}.	488
5303680	5304891	Tr_QM6a|TreeseiQM6a_004984-T1	No match	No match	No match	No match	No match
Chromosome_CP016235.1
25969	26670	Tr_QM6a|TreeseiQM6a_004988-T1	P79381	Epoxide hydrolase 1 (EC 3.3.2.9) (Epoxide hydratase) (Microsomal epoxide hydrolase) (mEH)	Sus scrofa (Pig)	FUNCTION: Biotransformation enzyme that catalyzes the hydrolysis of arene and aliphatic epoxides to less reactive and more water soluble dihydrodiols by the trans addition of water. May play a role in the metabolism of endogenous lipids such as epoxide-containing fatty acids. Metabolizes the abundant endocannabinoid 2-arachidonoylglycerol (2-AG) to free arachidonic acid (AA) and glycerol (By simi…	454
27999	28721	Tr_QM6a|TreeseiQM6a_004989-T1	No match	No match	No match	No match	No match
208781	210339	Tr_QM6a|TreeseiQM6a_005047-T1	No match	No match	No match	No match	No match
210772	211418	Tr_QM6a|TreeseiQM6a_005048-T1	No match	No match	No match	No match	No match
212532	214537	Tr_QM6a|TreeseiQM6a_005049-T1	Q8VY13	Ferric reduction oxidase 8, mitochondrial (AtFRO8) (EC 1.16.1.7) (Ferric-chelate reductase 8)	Arabidopsis thaliana (Mouse-ear cress)	FUNCTION: Ferric chelate reductase probably involved in iron reduction in leaf veins for transport. May participate in the transport of electrons to a Fe(3+) ion via FAD and heme intermediates. {ECO:0000269|PubMed:16006655}.	728
325831	328193	Tr_QM6a|TreeseiQM6a_005079-T1	P52959	Cutinase transcription factor 1 beta	Fusarium vanettenii (Neocosmospora pisi)		882
330655	332633	Tr_QM6a|TreeseiQM6a_005081-T1	No match	No match	No match	No match	No match
334497	335460	Tr_QM6a|TreeseiQM6a_005083-T1	P49374	High-affinity glucose transporter	Kluyveromyces lactis (strain ATCC 8585 / CBS 2359 / DSM 70799 / NBRC 1267 / NRRL Y-1140 / WM37) (Yeast) (Candida sphaerica)	FUNCTION: High-affinity glucose transporter.	551
405312	405757	Tr_QM6a|TreeseiQM6a_005107-T1	No match	No match	No match	No match	No match
406295	406823	Tr_QM6a|TreeseiQM6a_005108-T1	No match	No match	No match	No match	No match
407737	408832	Tr_QM6a|TreeseiQM6a_005110-T1	Q6L732	Kanamycin B dioxygenase (EC 1.14.11.37) (Kanamycin biosynthesis protein J)	Streptomyces kanamyceticus	FUNCTION: Mediates the conversion of kanamycin B into 2'-dehydrokanamycin A during the transformation of kanamycin B to kanamycin A. {ECO:0000269|PubMed:22374809}.	285
409062	410653	Tr_QM6a|TreeseiQM6a_005111-T1	No match	No match	No match	No match	No match
617107	618162	Tr_QM6a|TreeseiQM6a_005168-T1	No match	No match	No match	No match	No match
619358	620614	Tr_QM6a|TreeseiQM6a_005169-T1	No match	No match	No match	No match	No match
621430	622725	Tr_QM6a|TreeseiQM6a_005170-T1	No match	No match	No match	No match	No match
723377	725494	Tr_QM6a|TreeseiQM6a_005195-T1	No match	No match	No match	No match	No match
728321	728684	Tr_QM6a|TreeseiQM6a_005196-T1	No match	No match	No match	No match	No match
889222	890811	Tr_QM6a|TreeseiQM6a_005238-T1	No match	No match	No match	No match	No match
892314	892838	Tr_QM6a|TreeseiQM6a_005239-T1	No match	No match	No match	No match	No match
993516	994244	Tr_QM6a|TreeseiQM6a_005267-T1	No match	No match	No match	No match	No match
994325	994948	Tr_QM6a|TreeseiQM6a_005268-T1	No match	No match	No match	No match	No match
995760	997154	Tr_QM6a|TreeseiQM6a_005269-T1	No match	No match	No match	No match	No match
997585	1000242	Tr_QM6a|TreeseiQM6a_005270-T1	No match	No match	No match	No match	No match
1000510	1001927	Tr_QM6a|TreeseiQM6a_005271-T1	No match	No match	No match	No match	No match
1915971	1916767	Tr_QM6a|TreeseiQM6a_005475-T1	No match	No match	No match	No match	No match
1917870	1922829	Tr_QM6a|TreeseiQM6a_005476-T1	No match	No match	No match	No match	No match
1966682	1967984	Tr_QM6a|TreeseiQM6a_005490-T1	No match	No match	No match	No match	No match
1969291	1969896	Tr_QM6a|TreeseiQM6a_005492-T1	No match	No match	No match	No match	No match
2208705	2209418	Tr_QM6a|TreeseiQM6a_005555-T1	No match	No match	No match	No match	No match
2209712	2211112	Tr_QM6a|TreeseiQM6a_005556-T1	No match	No match	No match	No match	No match
2289329	2290021	Tr_QM6a|TreeseiQM6a_005578-T1	D7UQ42	Short chain dehydrogenase sol3 (EC 1.1.1.-) (Solanapyrone biosynthesis protein 3)	Alternaria solani	FUNCTION: Short chain dehydrogenase; part of the gene cluster that mediates the biosynthesis of the phytotoxin solanapyrone, a causal agent of early blight disease of potato and tomato (PubMed:20486243). The prosolanapyrone synthase sol1 is a polyketide synthase that produces the octaketide desmethylprosolanapyrone I via sequential condensations of 7 malonyl-CoA units with one acetyl-CoA unit, an…	285
2290612	2291591	Tr_QM6a|TreeseiQM6a_005579-T1	No match	No match	No match	No match	No match
2777706	2778234	Tr_QM6a|TreeseiQM6a_005713-T1	No match	No match	No match	No match	No match
2779173	2780174	Tr_QM6a|TreeseiQM6a_005714-T1	Q4WQZ2	Glutathione S-transferase-like protein tpcF (EC 2.5.1.-) (Trypacidin synthesis protein E)	Aspergillus fumigatus (strain ATCC MYA-4609 / CBS 101355 / FGSC A1100 / Af293) (Neosartorya fumigata)	FUNCTION: Glutathione S-transferase-like protein; part of the gene cluster that mediates the biosynthesis of trypacidin, a mycotoxin with antiprotozoal activity and that plays a role in the infection process (PubMed:26278536, PubMed:26242966). The pathway begins with the synthesis of atrochrysone thioester by the polyketide synthase (PKS) tpcC (PubMed:26242966). The atrochrysone carboxyl ACP thio…	225
2996805	2997330	Tr_QM6a|TreeseiQM6a_005775-T1	No match	No match	No match	No match	No match
2999031	2999835	Tr_QM6a|TreeseiQM6a_005776-T1	No match	No match	No match	No match	No match
3000657	3003519	Tr_QM6a|TreeseiQM6a_005777-T1	P46468	Putative cell division cycle ATPase	Plasmodium falciparum (isolate 3D7)		1229
3108876	3110144	Tr_QM6a|TreeseiQM6a_005807-T1	No match	No match	No match	No match	No match
3114297	3115667	Tr_QM6a|TreeseiQM6a_005809-T1	A1CIA7	Alkaline protease 1 (ALP) (EC 3.4.21.63) (Aspergillopeptidase B) (Aspergillus proteinase B) (Elastase) (Elastinolytic serine proteinase) (Oryzin)	Aspergillus clavatus (strain ATCC 1007 / CBS 513.65 / DSM 816 / NCTC 3887 / NRRL 1 / QM 1276 / 107)	FUNCTION: Secreted alkaline protease that allows assimilation of proteinaceous substrates. {ECO:0000250}.	403
4011814	4012482	Tr_QM6a|TreeseiQM6a_006044-T1	No match	No match	No match	No match	No match
4012906	4014529	Tr_QM6a|TreeseiQM6a_006045-T1	P36032	Probable transporter MCH2	Saccharomyces cerevisiae (strain ATCC 204508 / S288c) (Baker's yeast)	FUNCTION: Probable transporter. Does not act in the transport of monocarboxylic acids across the plasma membrane.	473
4019071	4021429	Tr_QM6a|TreeseiQM6a_006047-T1	No match	No match	No match	No match	No match
4023948	4025935	Tr_QM6a|TreeseiQM6a_006048-T1	No match	No match	No match	No match	No match
4028333	4028858	Tr_QM6a|TreeseiQM6a_006050-T1	No match	No match	No match	No match	No match
4032306	4034681	Tr_QM6a|TreeseiQM6a_006052-T1	No match	No match	No match	No match	No match
4035695	4038422	Tr_QM6a|TreeseiQM6a_006053-T1	No match	No match	No match	No match	No match
4070046	4072029	Tr_QM6a|TreeseiQM6a_006064-T1	No match	No match	No match	No match	No match
4073192	4073700	Tr_QM6a|TreeseiQM6a_006065-T1	No match	No match	No match	No match	No match
4075497	4076327	Tr_QM6a|TreeseiQM6a_006066-T1	Q9MZU4	S-adenosylmethionine-dependent nucleotide dehydratase RSAD2 (SAND) (EC 4.2.-.-) (Inflammatory response gene 6 protein) (Radical S-adenosyl methionine domain-containing protein 2) (Virus inhibitory protein, endoplasmic reticulum-associated, interferon-inducible) (Viperin)	Sus scrofa (Pig)	FUNCTION: Interferon-inducible antiviral protein which plays a major role in the cell antiviral state induced by type I and type II interferon. Catalyzes the conversion of cytidine triphosphate (CTP) to 3'-deoxy-3',4'-didehydro-CTP (ddhCTP) via a SAM-dependent radical mechanism. In turn, ddhCTP acts as a chain terminator for the RNA-dependent RNA polymerases from multiple viruses and directly inh…	362
4076715	4077093	Tr_QM6a|TreeseiQM6a_006067-T1	P00568	Adenylate kinase isoenzyme 1 (AK 1) (EC 2.7.4.10) (EC 2.7.4.3) (EC 2.7.4.6) (ATP-AMP transphosphorylase 1) (ATP:AMP phosphotransferase) (Adenylate monophosphate kinase) (Myokinase)	Homo sapiens (Human)	FUNCTION: Catalyzes the reversible transfer of the terminal phosphate group between ATP and AMP (PubMed:2542324). Exhibits nucleoside diphosphate kinase activity, catalyzing the production of ATP, CTP, GTP, UTP, dATP, dCTP, dGTP and dTTP from the corresponding diphosphate substrates with either ATP or GTP as phosphate donor (PubMed:23416111). Also catalyzes at a very low rate the synthesis of thi…	194
4077782	4078417	Tr_QM6a|TreeseiQM6a_006068-T1	No match	No match	No match	No match	No match
4079716	4080093	Tr_QM6a|TreeseiQM6a_006069-T1	No match	No match	No match	No match	No match
4148519	4148842	Tr_QM6a|TreeseiQM6a_006091-T1	No match	No match	No match	No match	No match
4149647	4150429	Tr_QM6a|TreeseiQM6a_006092-T1	Q94522	Succinate--CoA ligase [ADP/GDP-forming] subunit alpha, mitochondrial (EC 6.2.1.4) (EC 6.2.1.5) (Succinyl-CoA synthetase subunit alpha) (SCS-alpha) (Succinyl-coenzyme A synthetase alpha subunit 1)	Drosophila melanogaster (Fruit fly)	FUNCTION: Succinyl-CoA synthetase functions in the citric acid cycle (TCA), coupling the hydrolysis of succinyl-CoA to the synthesis of either ATP or GTP and thus represents the only step of substrate-level phosphorylation in the TCA. The alpha subunit of the enzyme binds the substrates coenzyme A and phosphate, while succinate binding and specificity for either ATP or GTP is provided by differen…	328
4152538	4154874	Tr_QM6a|TreeseiQM6a_006093-T1	Q9H2K2	Poly [ADP-ribose] polymerase tankyrase-2 (EC 2.4.2.30) (ADP-ribosyltransferase diphtheria toxin-like 6) (ARTD6) (Poly [ADP-ribose] polymerase 5B) (Protein poly-ADP-ribosyltransferase tankyrase-2) (EC 2.4.2.-) (TNKS-2) (TRF1-interacting ankyrin-related ADP-ribose polymerase 2) (Tankyrase II) (Tankyrase-2) (TANK2) (Tankyrase-like protein) (Tankyrase-related protein)	Homo sapiens (Human)	FUNCTION: Poly-ADP-ribosyltransferase involved in various processes such as Wnt signaling pathway, telomere length and vesicle trafficking (PubMed:11739745, PubMed:11802774, PubMed:19759537, PubMed:21478859, PubMed:23622245, PubMed:25043379). Acts as an activator of the Wnt signaling pathway by mediating poly-ADP-ribosylation of AXIN1 and AXIN2, 2 key components of the beta-catenin destruction co…	1166
4190902	4191148	Tr_QM6a|TreeseiQM6a_006101-T1	No match	No match	No match	No match	No match
4194429	4195352	Tr_QM6a|TreeseiQM6a_006104-T1	No match	No match	No match	No match	No match
4345152	4348838	Tr_QM6a|TreeseiQM6a_006133-T1	No match	No match	No match	No match	No match
4349602	4350624	Tr_QM6a|TreeseiQM6a_006134-T1	No match	No match	No match	No match	No match
4351637	4354575	Tr_QM6a|TreeseiQM6a_006135-T1	No match	No match	No match	No match	No match
4442608	4443356	Tr_QM6a|TreeseiQM6a_006156-T1	No match	No match	No match	No match	No match
4444617	4447466	Tr_QM6a|TreeseiQM6a_006157-T1	No match	No match	No match	No match	No match
4457706	4458923	Tr_QM6a|TreeseiQM6a_006160-T1	B8NPS8	Probable endo-xylogalacturonan hydrolase A (EC 3.2.1.-)	Aspergillus flavus (strain ATCC 200026 / FGSC A1120 / IAM 13836 / NRRL 3357 / JCM 12722 / SRRC 167)	FUNCTION: Pectinolytic enzyme involved in the degradation of xylogalacturonan (xga), a galacturonan backbone heavily substituted with xylose, and which is one important component of the hairy regions of pectin. Activity requires a galacturonic acid backbone substituted with xylose (By similarity). {ECO:0000250}.	406
4459671	4460330	Tr_QM6a|TreeseiQM6a_006161-T1	Q0CGP0	Probable exopolygalacturonase X (ExoPG) (EC 3.2.1.67) (Galacturan 1,4-alpha-galacturonidase) (Poly(1,4-alpha-D-galacturonide)galacturonohydrolase)	Aspergillus terreus (strain NIH 2624 / FGSC A1156)	FUNCTION: Specific in hydrolyzing the terminal glycosidic bond of polygalacturonic acid and oligogalacturonates. {ECO:0000250}.	434
4463525	4464576	Tr_QM6a|TreeseiQM6a_006162-T1	A1CPX0	Probable quinate permease (Quinate transporter)	Aspergillus clavatus (strain ATCC 1007 / CBS 513.65 / DSM 816 / NCTC 3887 / NRRL 1 / QM 1276 / 107)	FUNCTION: Integral membrane transporter that imports quinic acid to be catabolized as a carbon source. {ECO:0000250}.	540
4466351	4467635	Tr_QM6a|TreeseiQM6a_006164-T1	P80402	2,3-dihydroxybenzoate decarboxylase (2,3-DHBA decarboxylase) (DHBD) (EC 4.1.1.46) (o-pyrocatechuate decarboxylase)	Aspergillus oryzae (strain ATCC 42149 / RIB 40) (Yellow koji mold)	FUNCTION: Has an absolute substrate specificity for 2,3-DHBA.	338
4470376	4472492	Tr_QM6a|TreeseiQM6a_006166-T1	No match	No match	No match	No match	No match
4473258	4474943	Tr_QM6a|TreeseiQM6a_006167-T1	P23262	Salicylate hydroxylase (EC 1.14.13.1) (Salicylate 1-monooxygenase)	Pseudomonas putida (Arthrobacter siderocapsulatus)		434
Chromosome_CP016236.1
76525	78618	Tr_QM6a|TreeseiQM6a_006197-T1	A2TBU0	Probable inactive reductase easA (Ergot alkaloid synthesis protein A)	Epichloe festucae var. lolii (Neotyphodium lolii) (Acremonium lolii)	FUNCTION: Probable inactive dehydrogenase; part of the gene cluster that mediates the biosynthesis of fungal ergot alkaloid ergovaline, the predominant ergopeptine product in E.festucae var. lolii (PubMed:17308187). DmaW catalyzes the first step of ergot alkaloid biosynthesis by condensing dimethylallyl diphosphate (DMAP) and tryptophan to form 4-dimethylallyl-L-tryptophan (By similarity). The se…	380
78723	79166	Tr_QM6a|TreeseiQM6a_006198-T1	A2TBU0	Probable inactive reductase easA (Ergot alkaloid synthesis protein A)	Epichloe festucae var. lolii (Neotyphodium lolii) (Acremonium lolii)	FUNCTION: Probable inactive dehydrogenase; part of the gene cluster that mediates the biosynthesis of fungal ergot alkaloid ergovaline, the predominant ergopeptine product in E.festucae var. lolii (PubMed:17308187). DmaW catalyzes the first step of ergot alkaloid biosynthesis by condensing dimethylallyl diphosphate (DMAP) and tryptophan to form 4-dimethylallyl-L-tryptophan (By similarity). The se…	380
79806	80675	Tr_QM6a|TreeseiQM6a_006199-T1	No match	No match	No match	No match	No match
81193	82800	Tr_QM6a|TreeseiQM6a_006200-T1	No match	No match	No match	No match	No match
169266	170237	Tr_QM6a|TreeseiQM6a_006230-T1	No match	No match	No match	No match	No match
172001	172828	Tr_QM6a|TreeseiQM6a_006232-T1	O32003	SPbeta prophage-derived aminoglycoside N(3')-acetyltransferase-like protein YokD (EC 2.3.1.-)	Bacillus subtilis (strain 168)	FUNCTION: May contribute to antibiotic resistance. {ECO:0000305}.	272
185828	187171	Tr_QM6a|TreeseiQM6a_006236-T1	P54989	Nitrilotriacetate monooxygenase component A (NTA monooxygenase component A) (NTA-MO A) (EC 1.14.14.10)	Aminobacter aminovorans (Chelatobacter heintzii)	FUNCTION: Hydroxylation of nitrilotriacetate.	453
187354	188847	Tr_QM6a|TreeseiQM6a_006237-T1	Q7M4T0	Endo-1,6-beta-D-glucanase (EC 3.2.1.75) (Beta-1,6-glucanase Neg1) (Glucan endo-1,6-beta-glucosidase)	Neurospora crassa (strain ATCC 24698 / 74-OR23-1A / CBS 708.71 / DSM 1257 / FGSC 987)	FUNCTION: Partially degrades N.crassa cell wall beta-D-glucan, liberating small amounts of oligosaccharides.	480
303292	303831	Tr_QM6a|TreeseiQM6a_006275-T1	No match	No match	No match	No match	No match
305312	306424	Tr_QM6a|TreeseiQM6a_006276-T1	No match	No match	No match	No match	No match
307080	309029	Tr_QM6a|TreeseiQM6a_006277-T1	No match	No match	No match	No match	No match
332271	332759	Tr_QM6a|TreeseiQM6a_006282-T1	No match	No match	No match	No match	No match
336636	337988	Tr_QM6a|TreeseiQM6a_006284-T1	No match	No match	No match	No match	No match
449281	452054	Tr_QM6a|TreeseiQM6a_006298-T1	Q4WR75	Ferric/cupric reductase transmembrane component B (EC 1.-.-.-) (Ferric reductase B) (Ferrireductase B) (Ferric-chelate reductase B) (Metalloreductase freB)	Aspergillus fumigatus (strain ATCC MYA-4609 / CBS 101355 / FGSC A1100 / Af293) (Neosartorya fumigata)	FUNCTION: Ferric reductase involved in adaptation to iron starvation and which is most likely part of the reductive iron assimilatory system (RIA), a siderophore-independent high affinity iron uptake mechanism (PubMed:21840411). {ECO:0000269|PubMed:21840411}.	743
456315	457799	Tr_QM6a|TreeseiQM6a_006300-T1	O69763	Vanillin dehydrogenase (EC 1.2.1.67)	Pseudomonas fluorescens	FUNCTION: Catalyzes the NAD-dependent oxidation of vanillin to vanillic acid. {ECO:0000250}.	482
461733	463431	Tr_QM6a|TreeseiQM6a_006303-T1	No match	No match	No match	No match	No match
500885	501856	Tr_QM6a|TreeseiQM6a_006314-T1	No match	No match	No match	No match	No match
503420	503915	Tr_QM6a|TreeseiQM6a_006315-T1	No match	No match	No match	No match	No match
569734	570630	Tr_QM6a|TreeseiQM6a_006340-T1	No match	No match	No match	No match	No match
571283	571756	Tr_QM6a|TreeseiQM6a_006341-T1	No match	No match	No match	No match	No match
573439	577049	Tr_QM6a|TreeseiQM6a_006342-T1	No match	No match	No match	No match	No match
586517	586985	Tr_QM6a|TreeseiQM6a_006347-T1	No match	No match	No match	No match	No match
589100	590254	Tr_QM6a|TreeseiQM6a_006350-T1	Q6RVV4	Short-chain dehydrogenase TIC 32, chloroplastic (EC 1.1.1.-) (Translocon at the inner envelope membrane of chloroplasts 32) (PsTIC32)	Pisum sativum (Garden pea) (Lathyrus oleraceus)	FUNCTION: Involved in protein precursor import into chloroplasts. Part of the redox regulon consisting of TIC32, TIC 55 and TIC62. Has a NADPH-dependent dehydrogenase activity, but only after preincubation with lipids. {ECO:0000269|PubMed:17035502}.	316
598666	599850	Tr_QM6a|TreeseiQM6a_006352-T1	No match	No match	No match	No match	No match
600479	601687	Tr_QM6a|TreeseiQM6a_006353-T1	No match	No match	No match	No match	No match
675945	676219	Tr_QM6a|TreeseiQM6a_006374-T1	No match	No match	No match	No match	No match
677513	678172	Tr_QM6a|TreeseiQM6a_006375-T1	No match	No match	No match	No match	No match
680963	681493	Tr_QM6a|TreeseiQM6a_006377-T1	No match	No match	No match	No match	No match
1446664	1449207	Tr_QM6a|TreeseiQM6a_006539-T1	Q99024	Alpha-glucuronidase (EC 3.2.1.139) (Alpha-glucosiduronase) (GLRI)	Hypocrea jecorina (Trichoderma reesei)	FUNCTION: Releases 4-O-methylglucuronic acid from xylan.	847
1452501	1453775	Tr_QM6a|TreeseiQM6a_006541-T1	No match	No match	No match	No match	No match
1726430	1727223	Tr_QM6a|TreeseiQM6a_006615-T1	No match	No match	No match	No match	No match
1730463	1731428	Tr_QM6a|TreeseiQM6a_006617-T1	No match	No match	No match	No match	No match
1863817	1864464	Tr_QM6a|TreeseiQM6a_006648-T1	A1CPX0	Probable quinate permease (Quinate transporter)	Aspergillus clavatus (strain ATCC 1007 / CBS 513.65 / DSM 816 / NCTC 3887 / NRRL 1 / QM 1276 / 107)	FUNCTION: Integral membrane transporter that imports quinic acid to be catabolized as a carbon source. {ECO:0000250}.	540
1869259	1870751	Tr_QM6a|TreeseiQM6a_006651-T1	No match	No match	No match	No match	No match
2069843	2070946	Tr_QM6a|TreeseiQM6a_006707-T1	Q06479	F-box protein YLR352W	Saccharomyces cerevisiae (strain ATCC 204508 / S288c) (Baker's yeast)	FUNCTION: Substrate recognition component of a SCF (SKP1-CUL1-F-box protein) E3 ubiquitin-protein ligase complex which mediates the ubiquitination and subsequent proteasomal degradation of target proteins. Probably recognizes and binds to phosphorylated target proteins (By similarity). {ECO:0000250}.	807
2071896	2072171	Tr_QM6a|TreeseiQM6a_006708-T1	No match	No match	No match	No match	No match
2072682	2073650	Tr_QM6a|TreeseiQM6a_006709-T1	No match	No match	No match	No match	No match
2214464	2215057	Tr_QM6a|TreeseiQM6a_006745-T1	No match	No match	No match	No match	No match
2219457	2220467	Tr_QM6a|TreeseiQM6a_006747-T1	P62694	Exoglucanase 1 (EC 3.2.1.91) (1,4-beta-cellobiohydrolase) (Cellobiohydrolase 7A) (Cel7A) (Exocellobiohydrolase I) (CBHI) (Exoglucanase I)	Hypocrea jecorina (Trichoderma reesei)	FUNCTION: Exocellobiohydrolases (CBH) that catalyzes the hydrolysis of 1,4-beta-D-glucosidic bonds in cellulose to release the disaccharide cellobiose (Ref.4). The degradation of cellulose involves an interplay between different cellulolytic enzymes. Hydrolysis starts with endoglucanases (EGs), which cut internal beta-1,4-glucosidic bonds in cellulose to reduce the polymerization degree of the su…	513
2221294	2222382	Tr_QM6a|TreeseiQM6a_006748-T1	O14405	AA9 family lytic polysaccharide monooxygenase cel61A (LPMO9 cel61A) (EC 3.2.1.4) (Cellulase-61A) (Cel61A) (Endo-beta-1,4-glucanase cel61A) (Endoglucanase cel61A) (Endoglucanase IV) (Glycosyl hydrolase 61 family protein cel61A)	Hypocrea jecorina (Trichoderma reesei)	FUNCTION: Lytic polysaccharide monooxygenase (LMPO) that depolymerizes crystalline and amorphous polysaccharides via the oxidation of scissile alpha- or beta-(1-4)-glycosidic bonds, yielding C1 or C4 oxidation products (PubMed:9370370, PubMed:11737205). Catalysis by LPMOs requires the reduction of the active-site copper from Cu(II) to Cu(I) by a reducing agent and H(2)O(2) or O(2) as a cosubstrat…	344
2411199	2413585	Tr_QM6a|TreeseiQM6a_006809-T1	Q5ANB1	White-opaque regulator 2	Candida albicans (strain SC5314 / ATCC MYA-2876) (Yeast)	FUNCTION: Transcriptional regulator of the switch between 2 heritable states, the white and opaque states. These 2 cell types differ in many characteristics, including cell structure, mating competence, and virulence. Each state is heritable for many generations, and switching between states occurs stochastically, at low frequency. WOR2 is necessary for the stability of the opaque state phenotypi…	446
2414264	2415461	Tr_QM6a|TreeseiQM6a_006810-T1	No match	No match	No match	No match	No match
3266998	3269061	Tr_QM6a|TreeseiQM6a_007038-T1	No match	No match	No match	No match	No match
3272873	3273779	Tr_QM6a|TreeseiQM6a_007040-T1	No match	No match	No match	No match	No match
3275769	3276443	Tr_QM6a|TreeseiQM6a_007041-T1	No match	No match	No match	No match	No match
4028762	4029391	Tr_QM6a|TreeseiQM6a_007270-T1	No match	No match	No match	No match	No match
4030452	4030883	Tr_QM6a|TreeseiQM6a_007271-T1	No match	No match	No match	No match	No match
4032248	4034790	Tr_QM6a|TreeseiQM6a_007272-T1	No match	No match	No match	No match	No match
4034904	4035560	Tr_QM6a|TreeseiQM6a_007273-T1	No match	No match	No match	No match	No match
4037072	4037308	Tr_QM6a|TreeseiQM6a_007274-T1	No match	No match	No match	No match	No match
4043386	4046826	Tr_QM6a|TreeseiQM6a_007276-T1	Q9RT44	Nuclease SbcCD subunit C	Deinococcus radiodurans (strain ATCC 13939 / DSM 20539 / JCM 16871 / CCUG 27074 / LMG 4051 / NBRC 15346 / NCIMB 9279 / VKM B-1422 / R1)	FUNCTION: SbcCD cleaves DNA hairpin structures. These structures can inhibit DNA replication and are intermediates in certain DNA recombination reactions. The complex acts as a 3'->5' double strand exonuclease that can open hairpins. It also has a 5' single-strand endonuclease activity (By similarity). {ECO:0000250}.	909
4047619	4048969	Tr_QM6a|TreeseiQM6a_007277-T1	Q12358	Alpha-ketoglutarate-dependent sulfonate dioxygenase (EC 1.14.11.-)	Saccharomyces cerevisiae (strain ATCC 204508 / S288c) (Baker's yeast)	FUNCTION: Acts as an alpha-ketoglutarate-dependent dioxygenase active on sulfonates. Although taurine is a poor substrate, a variety of other sulfonates are utilized, with the best natural substrates being isethionate and taurocholate. {ECO:0000269|PubMed:10482536}.	412
Chromosome_CP016237.1
99648	101147	Tr_QM6a|TreeseiQM6a_007303-T1	O13899	Cardiolipin synthase (CMP-forming) / mitochondrial hydrolase fusion protein [Cleaved into: Mitochondrial hydrolase (EC 3.-.-.-); Cardiolipin synthase (CMP-forming) (CLS) (EC 2.7.8.41)]	Schizosaccharomyces pombe (strain 972 / ATCC 24843) (Fission yeast)	FUNCTION: [Cardiolipin synthase (CMP-forming)]: Catalyzes the synthesis of cardiolipin (CL) (diphosphatidylglycerol) by specifically transferring a phosphatidyl group from CDP-diacylglycerol to phosphatidylglycerol (PG) (PubMed:29958934). CL is a key phospholipid in mitochondrial membranes and plays important roles in maintaining the functional integrity and dynamics of mitochondria under both op…	595
102430	103386	Tr_QM6a|TreeseiQM6a_007304-T1	Q0GYU4	Glycerol 2-dehydrogenase (NADP(+)) (EC 1.1.1.156)	Hypocrea jecorina (Trichoderma reesei)	FUNCTION: Glycerol oxidoreductase probably involved in glycerol synthesis. {ECO:0000269|PubMed:16930134}.	318
153033	153629	Tr_QM6a|TreeseiQM6a_007319-T1	Q12586	Cytochrome P450 52A9 (EC 1.14.14.-) (Alkane-inducible P450-ALK5-A) (CYPLIIA9)	Candida maltosa (Yeast)	FUNCTION: Together with an NADPH cytochrome P450 the enzyme system catalyzes the terminal hydroxylation as the first step in the assimilation of alkanes and fatty acids.	521
156900	158999	Tr_QM6a|TreeseiQM6a_007320-T1	P48016	Periplasmic acid trehalase ATH1 (EC 3.2.1.28) (Alpha,alpha-trehalase) (Alpha,alpha-trehalose glucohydrolase)	Saccharomyces cerevisiae (strain ATCC 204508 / S288c) (Baker's yeast)	FUNCTION: Periplasmic acid trehalase that catalyzes hydrolysis of the disaccharide trehalose and required for growth on trehalose as carbon source (PubMed:7502577, PubMed:8647289, PubMed:19703229, PubMed:8764988). Growth on trehalose is strictly respiratory (By similarity). {ECO:0000250|UniProtKB:N1P212, ECO:0000269|PubMed:19703229, ECO:0000269|PubMed:7502577, ECO:0000269|PubMed:8647289, ECO:0000…	1211
226719	227570	Tr_QM6a|TreeseiQM6a_007338-T1	No match	No match	No match	No match	No match
229362	230162	Tr_QM6a|TreeseiQM6a_007339-T1	No match	No match	No match	No match	No match
231505	232147	Tr_QM6a|TreeseiQM6a_007340-T1	No match	No match	No match	No match	No match
278270	281775	Tr_QM6a|TreeseiQM6a_007350-T1	No match	No match	No match	No match	No match
284242	285092	Tr_QM6a|TreeseiQM6a_007352-T1	P43317	Endoglucanase-5 (EC 3.2.1.4) (Cellulase V) (Endo-1,4-beta-glucanase V) (EG V) (Endoglucanase V)	Hypocrea jecorina (Trichoderma reesei)		242
286635	287764	Tr_QM6a|TreeseiQM6a_007353-T1	P50166	D-arabinitol 2-dehydrogenase [ribulose-forming] (ARDH) (EC 1.1.1.250)	Candida tropicalis (Yeast)	FUNCTION: Catalyzes the NAD(+)-dependent oxidation of D-arabinitol at carbon 4 to produce D-ribulose. {ECO:0000269|PubMed:7698655, ECO:0000269|PubMed:8250887}.	282
288654	290312	Tr_QM6a|TreeseiQM6a_007354-T1	Q2KVT3	Transaldolase (EC 2.2.1.2)	Bordetella avium (strain 197N)	FUNCTION: Transaldolase is important for the balance of metabolites in the pentose-phosphate pathway. {ECO:0000255|HAMAP-Rule:MF_00492}.	319
341095	342386	Tr_QM6a|TreeseiQM6a_007360-T1	No match	No match	No match	No match	No match
345609	347229	Tr_QM6a|TreeseiQM6a_007361-T1	No match	No match	No match	No match	No match
592586	594495	Tr_QM6a|TreeseiQM6a_007438-T1	No match	No match	No match	No match	No match
594686	595376	Tr_QM6a|TreeseiQM6a_007439-T1	No match	No match	No match	No match	No match
596362	601302	Tr_QM6a|TreeseiQM6a_007440-T1	No match	No match	No match	No match	No match
667329	668640	Tr_QM6a|TreeseiQM6a_007449-T1	Q09851	NADPH-dependent 1-acyldihydroxyacetone phosphate reductase (ADR) (EC 1.1.1.101) (1-acyl DHAP reductase) (Acyl/alkyl DHAP reductase) (Acylglycerone-phosphate reductase) (Triacylglycerol lipase ayr1) (TAG lipase) (EC 3.1.1.3)	Schizosaccharomyces pombe (strain 972 / ATCC 24843) (Fission yeast)	FUNCTION: Can convert acyl and alkyl dihydroxyacetone-phosphate (DHAP) into glycerolipids and ether lipids, respectively. Required for the biosynthesis of phosphatidic acid via the DHAP pathway, where it reduces 1-acyl DHAP to lysophosphatidic acid (LPA). Also has triacylglycerol (TAG) lipase activity. Involved in the mobilization of the non-polar storage lipids triacylglycerols (TAGs) from lipid…	296
671831	673682	Tr_QM6a|TreeseiQM6a_007451-T1	G3XMD0	FAD-linked oxidoreductase azaL (EC 1.-.-.-) (Azaphilone biosynthesis cluster protein azaL)	Aspergillus niger (strain ATCC 1015 / CBS 113.46 / FGSC A1144 / LSHB Ac4 / NCTC 3858a / NRRL 328 / USDA 3528.7)	FUNCTION: FAD-linked oxidoreductase; part of the gene cluster that mediates the biosynthesis of azaphilones, a class of fungal metabolites characterized by a highly oxygenated pyrano-quinone bicyclic core and exhibiting a broad range of bioactivities (PubMed:22921072). In the first step, the non-reducing polyketide synthase azaA forms the hexaketide precursor from successive condensations of five…	472
746203	746687	Tr_QM6a|TreeseiQM6a_007472-T1	No match	No match	No match	No match	No match
746930	752815	Tr_QM6a|TreeseiQM6a_007473-T1	No match	No match	No match	No match	No match
753430	757628	Tr_QM6a|TreeseiQM6a_007474-T1	No match	No match	No match	No match	No match
903412	906944	Tr_QM6a|TreeseiQM6a_007518-T1	No match	No match	No match	No match	No match
907774	908872	Tr_QM6a|TreeseiQM6a_007519-T1	No match	No match	No match	No match	No match
967925	969746	Tr_QM6a|TreeseiQM6a_007533-T1	A0A142PTM2	Dehydrogenase mpl7 (EC 1.1.-.-) (Citrinin synthesis protein mpl7)	Monascus purpureus (Red mold) (Monascus anka)	FUNCTION: Dehydrogenase; part of the gene cluster that mediates the biosynthesis of the mycotoxin citrinin, a hepato-nephrotoxic compound to humans due to inhibition of respiration complex III (PubMed:27913218, PubMed:19012408, PubMed:19111642, PubMed:28238725). The pathway begins with the synthesis of a keto-aldehyde intermediate by the citrinin PKS (pksCT) from successive condensations of 4 mal…	622
973137	975757	Tr_QM6a|TreeseiQM6a_007535-T1	No match	No match	No match	No match	No match
980437	980853	Tr_QM6a|TreeseiQM6a_007537-T1	No match	No match	No match	No match	No match
981655	982503	Tr_QM6a|TreeseiQM6a_007538-T1	P15369	Scytalidopepsin B (SLB) (EC 3.4.23.32) (Acid protease B)	Scytalidium lignicola (Hyphomycete)		260
1114793	1116199	Tr_QM6a|TreeseiQM6a_007545-T1	Q9UV10	Heterokaryon incompatibility protein 6, OR allele (Het-6(OR))	Neurospora crassa (strain ATCC 24698 / 74-OR23-1A / CBS 708.71 / DSM 1257 / FGSC 987)	FUNCTION: Involved in the non-self-recognition during asexual growth of N.crassa. This process involves restriction of heterokaryon formation via genetic differences at 11 het loci, including mating type.	680
1117256	1118614	Tr_QM6a|TreeseiQM6a_007546-T1	No match	No match	No match	No match	No match
1120002	1121960	Tr_QM6a|TreeseiQM6a_007547-T1	D4AUF4	WSC domain-containing protein ARB_07870	Arthroderma benhamiae (strain ATCC MYA-4681 / CBS 112371) (Trichophyton mentagrophytes)		720
1266348	1266887	Tr_QM6a|TreeseiQM6a_007579-T1	No match	No match	No match	No match	No match
1270356	1272566	Tr_QM6a|TreeseiQM6a_007580-T1	No match	No match	No match	No match	No match
1277355	1279659	Tr_QM6a|TreeseiQM6a_007583-T1	No match	No match	No match	No match	No match
1280311	1283780	Tr_QM6a|TreeseiQM6a_007584-T1	No match	No match	No match	No match	No match
1317860	1318204	Tr_QM6a|TreeseiQM6a_007596-T1	No match	No match	No match	No match	No match
1320453	1322303	Tr_QM6a|TreeseiQM6a_007597-T1	No match	No match	No match	No match	No match
1326781	1327019	Tr_QM6a|TreeseiQM6a_007600-T1	No match	No match	No match	No match	No match
1327124	1327989	Tr_QM6a|TreeseiQM6a_007601-T1	No match	No match	No match	No match	No match
1329122	1329994	Tr_QM6a|TreeseiQM6a_007602-T1	No match	No match	No match	No match	No match
1330767	1331746	Tr_QM6a|TreeseiQM6a_007603-T1	No match	No match	No match	No match	No match
1366081	1372871	Tr_QM6a|TreeseiQM6a_007614-T1	Q4WMJ7	Nonribosomal peptide synthetase gliP (NRPS gliP) (EC 6.3.2.-) (Gliotoxin biosynthesis protein P)	Aspergillus fumigatus (strain ATCC MYA-4609 / CBS 101355 / FGSC A1100 / Af293) (Neosartorya fumigata)	FUNCTION: Nonribosomal peptide synthetase; part of the gene cluster that mediates the biosynthesis of gliotoxin, a member of the epipolythiodioxopiperazine (ETP) class of toxins characterized by a disulfide-bridged cyclic dipeptide (PubMed:15979823, PubMed:16757745, PubMed:16956378, PubMed:21612254). The first step in gliotoxin biosynthesis is the condensation of serine and phenylalanine to form …	2135
1377210	1378083	Tr_QM6a|TreeseiQM6a_007617-T1	No match	No match	No match	No match	No match
1402740	1404160	Tr_QM6a|TreeseiQM6a_007627-T1	No match	No match	No match	No match	No match
1405521	1406417	Tr_QM6a|TreeseiQM6a_007628-T1	No match	No match	No match	No match	No match
1407032	1407576	Tr_QM6a|TreeseiQM6a_007629-T1	Q58ED9	N-alpha-acetyltransferase 20 (EC 2.3.1.254) (Methionine N-acetyltransferase) (N-acetyltransferase 5) (N-terminal acetyltransferase B complex catalytic subunit NAA20) (N-terminal acetyltransferase B complex catalytic subunit NAT5) (NatB complex subunit NAT5) (NatB catalytic subunit)	Danio rerio (Zebrafish) (Brachydanio rerio)	FUNCTION: Catalytic subunit of the NatB complex which catalyzes acetylation of the N-terminal methionine residues of peptides beginning with Met-Asp, Met-Glu, Met-Asn and Met-Gln. Proteins with cell cycle functions are overrepresented in the pool of NatB substrates. Required for maintaining the structure and function of actomyosin fibers and for proper cellular migration. {ECO:0000250|UniProtKB:P…	178
1501978	1504115	Tr_QM6a|TreeseiQM6a_007656-T1	D4B1N9	Probable secreted lipase ARB_02369 (EC 3.1.1.3)	Arthroderma benhamiae (strain ATCC MYA-4681 / CBS 112371) (Trichophyton mentagrophytes)		564
1506478	1507966	Tr_QM6a|TreeseiQM6a_007657-T1	No match	No match	No match	No match	No match
1510247	1514109	Tr_QM6a|TreeseiQM6a_007659-T1	No match	No match	No match	No match	No match
1514798	1515830	Tr_QM6a|TreeseiQM6a_007660-T1	No match	No match	No match	No match	No match
1536656	1538627	Tr_QM6a|TreeseiQM6a_007667-T1	Q8H151	Malonate--CoA ligase (EC 6.2.1.76) (Acyl-activating enzyme 13) (Malonyl-CoA synthetase)	Arabidopsis thaliana (Mouse-ear cress)	FUNCTION: Malonate--CoA ligase that catalyzes the formation of malonyl-CoA directly from malonate and CoA. May be required for the detoxification of malonate. {ECO:0000269|PubMed:21642549}.	608
1538719	1541322	Tr_QM6a|TreeseiQM6a_007668-T1	Q9UV10	Heterokaryon incompatibility protein 6, OR allele (Het-6(OR))	Neurospora crassa (strain ATCC 24698 / 74-OR23-1A / CBS 708.71 / DSM 1257 / FGSC 987)	FUNCTION: Involved in the non-self-recognition during asexual growth of N.crassa. This process involves restriction of heterokaryon formation via genetic differences at 11 het loci, including mating type.	680
1547833	1548957	Tr_QM6a|TreeseiQM6a_007670-T1	No match	No match	No match	No match	No match
1549345	1550816	Tr_QM6a|TreeseiQM6a_007671-T1	No match	No match	No match	No match	No match
1552451	1555483	Tr_QM6a|TreeseiQM6a_007672-T1	No match	No match	No match	No match	No match
1594449	1595264	Tr_QM6a|TreeseiQM6a_007686-T1	No match	No match	No match	No match	No match
1598027	1598778	Tr_QM6a|TreeseiQM6a_007687-T1	G0R947	Endo-1,4-beta-xylanase 1 (EX 1) (Xylanase 1) (EC 3.2.1.8) (1,4-beta-D-xylan xylanohydrolase 1) (Acidic endo-beta-1,4-xylanase)	Hypocrea jecorina (strain QM6a) (Trichoderma reesei)	FUNCTION: Glycoside hydrolase involved in the hydrolysis of xylan, a major plant cell wall hemicellulose made up of 1,4-beta-linked D-xylopyranose residues. Catalyzes the endohydrolysis of the main-chain 1,4-beta-glycosidic bonds connecting the xylose subunits yielding various xylooligosaccharides and xylose. {ECO:0000250|UniProtKB:P36218}.	229
1651045	1652352	Tr_QM6a|TreeseiQM6a_007689-T1	No match	No match	No match	No match	No match
1653224	1654578	Tr_QM6a|TreeseiQM6a_007690-T1	No match	No match	No match	No match	No match
1654872	1656400	Tr_QM6a|TreeseiQM6a_007691-T1	No match	No match	No match	No match	No match
1657204	1657824	Tr_QM6a|TreeseiQM6a_007692-T1	No match	No match	No match	No match	No match
1658662	1661073	Tr_QM6a|TreeseiQM6a_007693-T1	No match	No match	No match	No match	No match
1664665	1666241	Tr_QM6a|TreeseiQM6a_007695-T1	No match	No match	No match	No match	No match
1701038	1702623	Tr_QM6a|TreeseiQM6a_007706-T1	I1RF57	Aurofusarin cluster transcription factor aurR2 (Aurofusarin biosynthesis cluster protein R2) (Gibberella pigment protein 5)	Gibberella zeae (strain ATCC MYA-4620 / CBS 123657 / FGSC 9075 / NRRL 31084 / PH-1) (Wheat head blight fungus) (Fusarium graminearum)	FUNCTION: Transcription factor that may participate in the regulation of the expression of the gene cluster that mediates the biosynthesis of aurofusarin, a red mycelium pigment which is acting as a mycotoxin (PubMed:15809006, PubMed:16879655, PubMed:16461721). {ECO:0000269|PubMed:15809006, ECO:0000269|PubMed:16461721, ECO:0000269|PubMed:16879655}.	670
1702992	1703846	Tr_QM6a|TreeseiQM6a_007707-T1	O13871	Uncharacterized methyltransferase C1B3.06c (EC 2.1.1.-)	Schizosaccharomyces pombe (strain 972 / ATCC 24843) (Fission yeast)	FUNCTION: Probable methyltransferase. {ECO:0000250}.	278
2720824	2721291	Tr_QM6a|TreeseiQM6a_007924-T1	No match	No match	No match	No match	No match
2722847	2723914	Tr_QM6a|TreeseiQM6a_007925-T1	No match	No match	No match	No match	No match
2725488	2727458	Tr_QM6a|TreeseiQM6a_007926-T1	No match	No match	No match	No match	No match
2732437	2734417	Tr_QM6a|TreeseiQM6a_007928-T1	O43301	Heat shock 70 kDa protein 12A	Homo sapiens (Human)	FUNCTION: Adapter protein for SORL1, but not SORT1. Delays SORL1 internalization and affects SORL1 subcellular localization. {ECO:0000269|PubMed:30679749}.	675
2898627	2898887	Tr_QM6a|TreeseiQM6a_007982-T1	No match	No match	No match	No match	No match
2899391	2900055	Tr_QM6a|TreeseiQM6a_007983-T1	No match	No match	No match	No match	No match
2903677	2904377	Tr_QM6a|TreeseiQM6a_007986-T1	No match	No match	No match	No match	No match
2905344	2906396	Tr_QM6a|TreeseiQM6a_007987-T1	No match	No match	No match	No match	No match
3106549	3107568	Tr_QM6a|TreeseiQM6a_008039-T1	No match	No match	No match	No match	No match
3109687	3112304	Tr_QM6a|TreeseiQM6a_008040-T1	No match	No match	No match	No match	No match
3361994	3364005	Tr_QM6a|TreeseiQM6a_008103-T1	A1CPX0	Probable quinate permease (Quinate transporter)	Aspergillus clavatus (strain ATCC 1007 / CBS 513.65 / DSM 816 / NCTC 3887 / NRRL 1 / QM 1276 / 107)	FUNCTION: Integral membrane transporter that imports quinic acid to be catabolized as a carbon source. {ECO:0000250}.	540
3366870	3367574	Tr_QM6a|TreeseiQM6a_008104-T1	No match	No match	No match	No match	No match
3515227	3516619	Tr_QM6a|TreeseiQM6a_008141-T1	No match	No match	No match	No match	No match
3520275	3524758	Tr_QM6a|TreeseiQM6a_008142-T1	No match	No match	No match	No match	No match
3689545	3690783	Tr_QM6a|TreeseiQM6a_008191-T1	No match	No match	No match	No match	No match
3694235	3695848	Tr_QM6a|TreeseiQM6a_008193-T1	A0A161CLJ6	Citrinin biosynthesis cluster MFS transporter mrr1	Monascus ruber (Mold)	FUNCTION: MFS transporter; part of the gene cluster that mediates the biosynthesis the mycotoxin citrinin, a hepato-nephrotoxic compound to humans due to inhibition of respiration complex III (Ref.1). {ECO:0000305|Ref.1}.	499
3696321	3696788	Tr_QM6a|TreeseiQM6a_008194-T1	No match	No match	No match	No match	No match
3708472	3709989	Tr_QM6a|TreeseiQM6a_008196-T1	D4AZ50	Nuclear distribution protein PAC1 (Lissencephaly-1 homolog) (LIS-1) (nudF homolog)	Arthroderma benhamiae (strain ATCC MYA-4681 / CBS 112371) (Trichophyton mentagrophytes)	FUNCTION: Positively regulates the activity of the minus-end directed microtubule motor protein dynein. May enhance dynein-mediated microtubule sliding by targeting dynein to the microtubule plus end. Required for nuclear migration during vegetative growth as well as development. Required for retrograde early endosome (EE) transport from the hyphal tip. Required for localization of dynein to the …	461
3713226	3715230	Tr_QM6a|TreeseiQM6a_008199-T1	P11018	Major intracellular serine protease (EC 3.4.21.-) (ISP-1)	Bacillus subtilis (strain 168)	FUNCTION: Major intracellular protease produced by Bacillus subtilis.	319
Chromosome_CP016238.1
54053	55641	Tr_QM6a|TreeseiQM6a_008271-T1	No match	No match	No match	No match	No match
57747	58926	Tr_QM6a|TreeseiQM6a_008272-T1	No match	No match	No match	No match	No match
60539	66101	Tr_QM6a|TreeseiQM6a_008273-T1	No match	No match	No match	No match	No match
104269	104810	Tr_QM6a|TreeseiQM6a_008287-T1	O74969	High-affinity glucose transporter ght2 (Hexose transporter 2)	Schizosaccharomyces pombe (strain 972 / ATCC 24843) (Fission yeast)	FUNCTION: High-affinity glucose transporter.	531
108761	109432	Tr_QM6a|TreeseiQM6a_008289-T1	No match	No match	No match	No match	No match
451764	452633	Tr_QM6a|TreeseiQM6a_008387-T1	No match	No match	No match	No match	No match
453575	455985	Tr_QM6a|TreeseiQM6a_008388-T1	O60177	Uncharacterized ATP-dependent helicase C23E6.02 (EC 3.6.4.-)	Schizosaccharomyces pombe (strain 972 / ATCC 24843) (Fission yeast)		1040
796806	797174	Tr_QM6a|TreeseiQM6a_008470-T1	No match	No match	No match	No match	No match
800642	802177	Tr_QM6a|TreeseiQM6a_008472-T1	V5XZS6	Cytochrome P450 monooxygenase AKT7 (EC 1.-.-.-) (AK-toxin biosynthesis protein 7)	Alternaria alternata (Alternaria rot fungus) (Torula alternata)	FUNCTION: Cytochrome P450 monooxygenase; part of the gene clusters that mediate the biosynthesis of the host-selective toxins (HSTs) AK-toxins responsible for Japanese pear black spot disease by the Japanese pear pathotype (PubMed:24611558). AK-toxins are esters of 9,10-epoxy 8-hydroxy 9-methyldecatrienoic acid (EDA) (PubMed:22846083). On cellular level, AK-toxins affect plasma membrane of suscep…	522
1104839	1107454	Tr_QM6a|TreeseiQM6a_008555-T1	No match	No match	No match	No match	No match
1109517	1111399	Tr_QM6a|TreeseiQM6a_008557-T1	No match	No match	No match	No match	No match
1991897	1993366	Tr_QM6a|TreeseiQM6a_008748-T1	No match	No match	No match	No match	No match
1995472	1997260	Tr_QM6a|TreeseiQM6a_008749-T1	Q6FVD3	Protein HIR1	Candida glabrata (strain ATCC 2001 / BCRC 20586 / JCM 3761 / NBRC 0622 / NRRL Y-65 / CBS 138) (Yeast) (Nakaseomyces glabratus)	FUNCTION: Required for replication-independent chromatin assembly and for the periodic repression of histone gene transcription during the cell cycle. {ECO:0000250}.	840
2608933	2609504	Tr_QM6a|TreeseiQM6a_008925-T1	No match	No match	No match	No match	No match
2611624	2616159	Tr_QM6a|TreeseiQM6a_008926-T1	P27643	Stage V sporulation protein K	Bacillus subtilis (strain 168)		322
2616391	2620182	Tr_QM6a|TreeseiQM6a_008927-T1	No match	No match	No match	No match	No match
2621038	2623233	Tr_QM6a|TreeseiQM6a_008928-T1	Q822Q4	Chaperone protein ClpB	Chlamydia caviae (strain ATCC VR-813 / DSM 19441 / 03DC25 / GPIC) (Chlamydophila caviae)	FUNCTION: Part of a stress-induced multi-chaperone system, it is involved in the recovery of the cell from heat-induced damage, in cooperation with DnaK, DnaJ and GrpE. Acts before DnaK, in the processing of protein aggregates. Protein binding stimulates the ATPase activity; ATP hydrolysis unfolds the denatured protein aggregates, which probably helps expose new hydrophobic binding sites on the s…	864
2623770	2624333	Tr_QM6a|TreeseiQM6a_008929-T1	No match	No match	No match	No match	No match
2625168	2625650	Tr_QM6a|TreeseiQM6a_008930-T1	No match	No match	No match	No match	No match
2702504	2703757	Tr_QM6a|TreeseiQM6a_008952-T1	No match	No match	No match	No match	No match
2705470	2706655	Tr_QM6a|TreeseiQM6a_008953-T1	M1W079	N-methyltransferase tcpN (EC 2.1.1.-) (Thioclapurine biosynthesis protein N)	Claviceps purpurea (strain 20.1) (Ergot fungus) (Sphacelia segetum)	FUNCTION: N-methyltransferase; part of the gene cluster that mediates the biosynthesis of an unusual class of epipolythiodioxopiperazines (ETPs) lacking the reactive thiol group important for toxicity (PubMed:27390873). Firstly, L-tyrosine is prenylated by tcpD, before undergoing condensation with L-glycine in a reaction catalyzed by the NRPS tcpP leading to the diketopiperazine (DKP) backbone (P…	281
2706702	2708555	Tr_QM6a|TreeseiQM6a_008954-T1	P14581	Cytochrome P450 4A7 (CYPIVA7) (Cytochrome P450-KA-2) (Lauric acid omega-hydroxylase) (Long-chain fatty acid omega-monooxygenase) (EC 1.14.14.80)	Oryctolagus cuniculus (Rabbit)	FUNCTION: Cytochromes P450 are a group of heme-thiolate monooxygenases. In liver microsomes, this enzyme is involved in an NADPH-dependent electron transport pathway. It oxidizes a variety of structurally unrelated compounds, including steroids, fatty acids, and xenobiotics.; FUNCTION: The kidney P-450 system is rather specialized for the omega-hydroxylation of fatty acids. Both P450-KA1 and P450…	511
2760722	2761238	Tr_QM6a|TreeseiQM6a_008972-T1	No match	No match	No match	No match	No match
2763072	2766765	Tr_QM6a|TreeseiQM6a_008973-T1	No match	No match	No match	No match	No match
2774646	2775852	Tr_QM6a|TreeseiQM6a_008976-T1	No match	No match	No match	No match	No match
2778148	2778738	Tr_QM6a|TreeseiQM6a_008978-T1	No match	No match	No match	No match	No match
2779433	2779843	Tr_QM6a|TreeseiQM6a_008979-T1	No match	No match	No match	No match	No match
2828164	2830015	Tr_QM6a|TreeseiQM6a_008988-T1	Q10097	Uncharacterized transporter C11D3.18C	Schizosaccharomyces pombe (strain 972 / ATCC 24843) (Fission yeast)		498
2830635	2831804	Tr_QM6a|TreeseiQM6a_008989-T1	D4AV38	Probable secreted lipase ARB_00047 (EC 3.1.1.1)	Arthroderma benhamiae (strain ATCC MYA-4681 / CBS 112371) (Trichophyton mentagrophytes)	FUNCTION: Lipase that displays broad substrate specificity. {ECO:0000250|UniProtKB:L0TC47}.	394
2832445	2833695	Tr_QM6a|TreeseiQM6a_008990-T1	No match	No match	No match	No match	No match
2849867	2850262	Tr_QM6a|TreeseiQM6a_008995-T1	No match	No match	No match	No match	No match
2850738	2851214	Tr_QM6a|TreeseiQM6a_008996-T1	No match	No match	No match	No match	No match
3166861	3167448	Tr_QM6a|TreeseiQM6a_009088-T1	No match	No match	No match	No match	No match
3169865	3170440	Tr_QM6a|TreeseiQM6a_009089-T1	No match	No match	No match	No match	No match
3300174	3300620	Tr_QM6a|TreeseiQM6a_009125-T1	No match	No match	No match	No match	No match
3305313	3308219	Tr_QM6a|TreeseiQM6a_009127-T1	Q9FIY7	DNA repair protein RAD5B (EC 3.6.4.-) (Putative SWI/SNF-related matrix-associated actin-dependent regulator of chromatin subfamily A member 3-like 3) (SMARCA3-like protein 3) (RAD5 homolog B) (AtRAD5B)	Arabidopsis thaliana (Mouse-ear cress)	FUNCTION: Possesses intrinsic ATP-dependent nucleosome-remodeling activity. This activity may be required for DNA repair. Does not seem to be required for DNA repair and regulation of homologous recombination (HR) (PubMed:18310306). {ECO:0000250, ECO:0000269|PubMed:18310306}.	1277
3321184	3321675	Tr_QM6a|TreeseiQM6a_009131-T1	No match	No match	No match	No match	No match
3321849	3324416	Tr_QM6a|TreeseiQM6a_009132-T1	No match	No match	No match	No match	No match
3328044	3329204	Tr_QM6a|TreeseiQM6a_009134-T1	No match	No match	No match	No match	No match
3445562	3447065	Tr_QM6a|TreeseiQM6a_009176-T1	No match	No match	No match	No match	No match
3447173	3447585	Tr_QM6a|TreeseiQM6a_009177-T1	No match	No match	No match	No match	No match
3454267	3455139	Tr_QM6a|TreeseiQM6a_009179-T1	No match	No match	No match	No match	No match
3459783	3461333	Tr_QM6a|TreeseiQM6a_009182-T1	No match	No match	No match	No match	No match
3617048	3617508	Tr_QM6a|TreeseiQM6a_009232-T1	No match	No match	No match	No match	No match
3621220	3622221	Tr_QM6a|TreeseiQM6a_009234-T1	O97764	Zeta-crystallin	Bos taurus (Bovine)	FUNCTION: Interacts with (AU)-rich elements (ARE) in the 3'-UTR of target mRNA species and enhances their stability. NADPH binding interferes with mRNA binding (By similarity). Has minimal or no quinone reductase activity. Binds strongly to single-stranded DNA. {ECO:0000250, ECO:0000269|PubMed:9154917}.	330
3622521	3624359	Tr_QM6a|TreeseiQM6a_009235-T1	G1XU01	Cytochrome P450 monooxygenase AOL_s00215g280 (EC 1.-.-.-) (Sesquiterpenyl epoxy-cyclohexenoids cluster protein AOL_s00215g280) (SECs cluster protein AOL_s00215g280)	Arthrobotrys oligospora (strain ATCC 24927 / CBS 115.81 / DSM 1491) (Nematode-trapping fungus) (Didymozoophaga oligospora)	FUNCTION: Cytochrome P450 monooxygenase; part of the gene cluster that mediates the biosynthesis of sesquiterpenyl epoxy-cyclohexenoids (SECs) such as anthrobotrisins and arthrosporols, metabolites that possess a novel hybrid carbon skeleton consisting of a polyketide-derived epoxycyclohexenol combined with a terpenoid-derived monocyclic sesquiterpenol substructure (PKS-PTS hybrid) (PubMed:284758…	501
3669896	3670291	Tr_QM6a|TreeseiQM6a_009252-T1	No match	No match	No match	No match	No match
3672689	3673318	Tr_QM6a|TreeseiQM6a_009254-T1	No match	No match	No match	No match	No match
3730870	3731446	Tr_QM6a|TreeseiQM6a_009272-T1	No match	No match	No match	No match	No match
3734768	3735692	Tr_QM6a|TreeseiQM6a_009273-T1	P22008	Pyrroline-5-carboxylate reductase (P5C reductase) (P5CR) (EC 1.5.1.2) (PCA reductase)	Pseudomonas aeruginosa (strain ATCC 15692 / DSM 22644 / CIP 104116 / JCM 14847 / LMG 12228 / 1C / PRS 101 / PAO1)	FUNCTION: Catalyzes the reduction of 1-pyrroline-5-carboxylate (PCA) to L-proline. {ECO:0000255|HAMAP-Rule:MF_01925, ECO:0000269|PubMed:2107123}.	273
3805219	3806351	Tr_QM6a|TreeseiQM6a_009295-T1	P07987	Exoglucanase 2 (EC 3.2.1.91) (1,4-beta-cellobiohydrolase) (Cellobiohydrolase 6A) (Cel6A) (Exocellobiohydrolase II) (CBHII) (Exoglucanase II)	Hypocrea jecorina (Trichoderma reesei)	FUNCTION: Exocellobiohydrolases (CBH) that catalyzes the hydrolysis of 1,4-beta-D-glucosidic bonds in cellulose to release the disaccharide cellobiose (Ref.3). The degradation of cellulose involves an interplay between different cellulolytic enzymes. Hydrolysis starts with endoglucanases (EGs), which cut internal beta-1,4-glucosidic bonds in cellulose to reduce the polymerization degree of the su…	471
3810016	3811026	Tr_QM6a|TreeseiQM6a_009296-T1	Q4WXZ5	Ribonuclease T2-like (RNase T2-like) (EC 4.6.1.19)	Aspergillus fumigatus (strain ATCC MYA-4609 / CBS 101355 / FGSC A1100 / Af293) (Neosartorya fumigata)	FUNCTION: Rnase which modulates cell survival under stress conditions. Released from the vacuole to the cytoplasm during stress to promote tRNA and rRNA cleavage and to activate separately a downstream pathway that promotes cell death. Involved in cell size, vacuolar morphology and growth at high temperatures and high salt concentration (By similarity). {ECO:0000250}.	408
